# Supplementary material for: Systematic mapping of TF-mediated cell fate changes by a pooled induction coupled with scRNA-seq and multi-omics approaches
Source: HighWire-hosted journal article supplement (doi:10.1101/gr.277926.123), 2024-04-05
Supplement: Supplelmental_Figure_S1_S8.pdf [file Supplelmental_Figure_S1_S8.pdf]

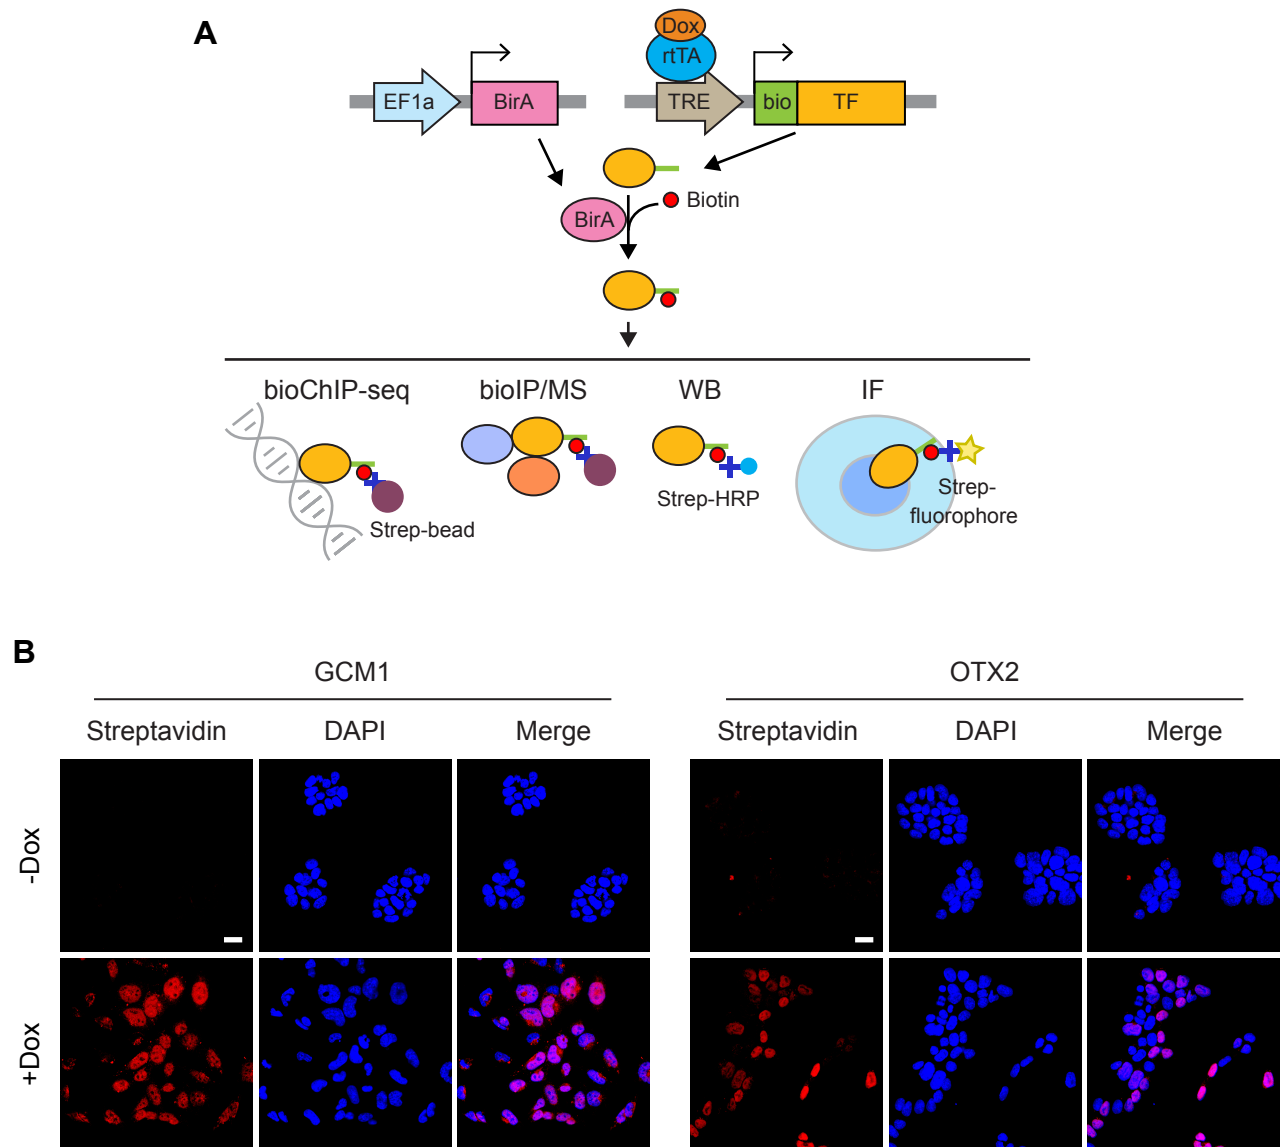

**Figure S1. Downstream applications of metabolic biotinylation of TFs**

(A) Schematic representation of the SBFB system and its diverse applications.

(B) Visualization of biotinylated Gcm1 and Otx2 induced by treatment of doxycycline (Dox, 0.5  $\mu\text{g/mL}$ ) for 2 days. Immunofluorescence was performed using streptavidin-fluorophore (Alexa Fluor™ 555 conjugate, Thermo Fisher Scientific, S21381). Scale bar: 20  $\mu\text{m}$ .

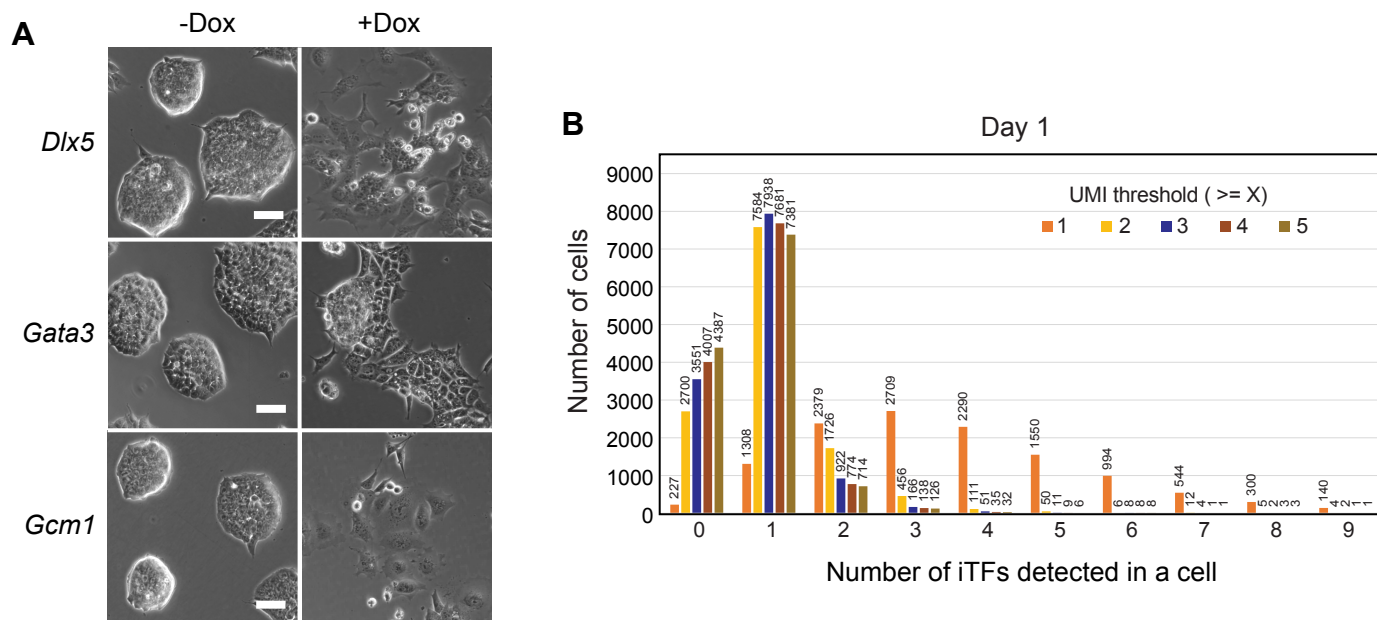

**Figure S2. Morphology of representative individual iTF lines upon induction**

(A) Morphology of representative individual iTF lines under uninduced condition (-Dox) and upon induction of TFs after treatment with Dox (0.5  $\mu\text{g/mL}$ ) for 2 days. Scale bars = 50  $\mu\text{m}$ .

(B) The number of cells after 1 day of induction according to the number of detected iTFs and UMI thresholds. UMI threshold 3 shows the highest number of cells expressing a single iTF (7,938 cells). Cells without detected iTFs under UMI threshold 1 (227 cells) were used as control.

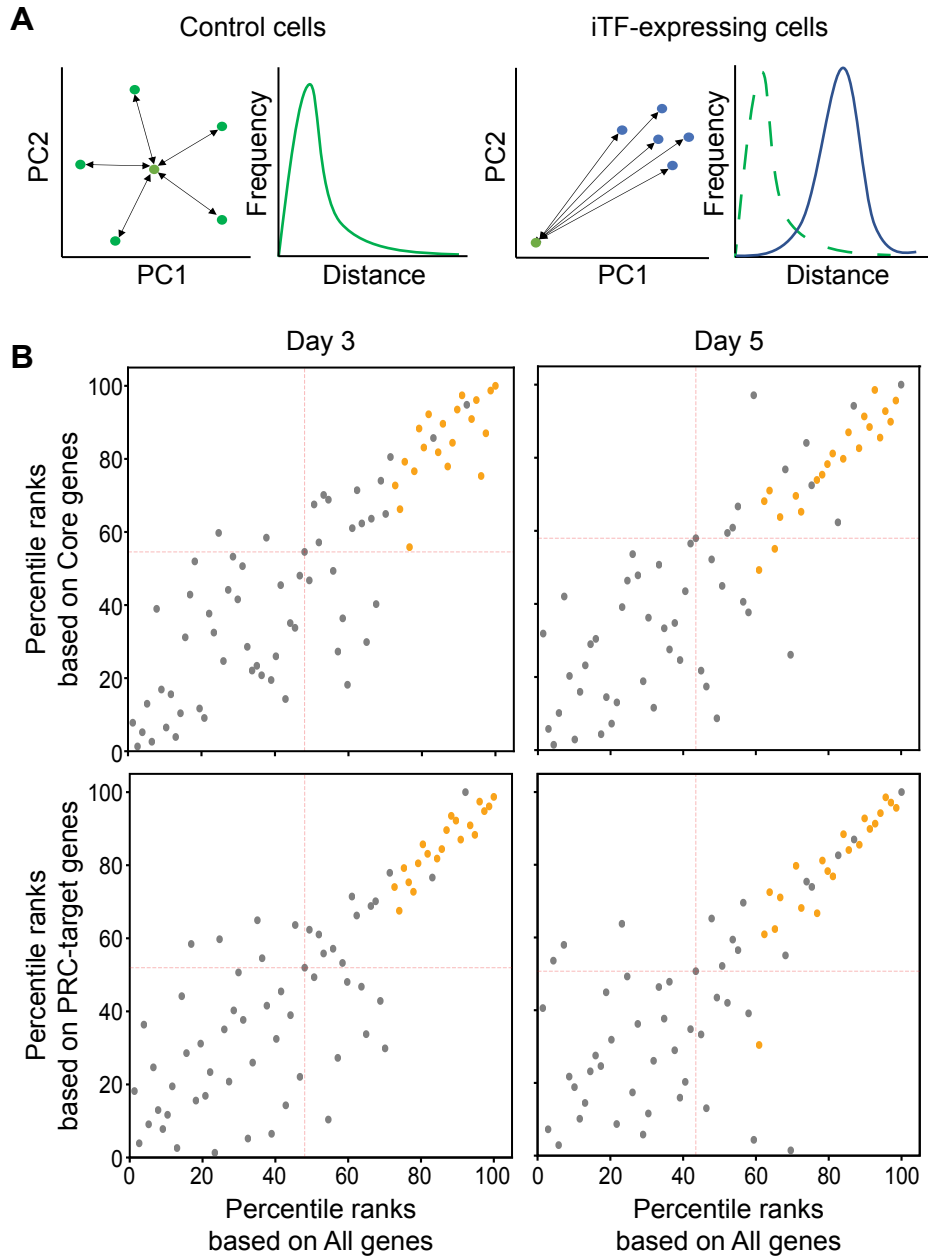

**Figure S3. Determining cell fate changes by calculating differentiation index and fate-changing potential of iTFs**

(A) Schematic view of differentiation index calculation. Distances between control cells and their centroid were calculated based on principal components (PC), and the distribution was right-skewed (left panels). Then, distances between iTF-overexpressing cells and the centroid of control cells were measured and compared with those of control cells (right panels).

(B) Comparison between differentiation indexes based on All genes (x-axis) and Core genes (y-axis of top plots) or PRC-target genes (y-axis of bottom plots) after 3 and 5 days of induction. Since the differentiation indexes for each gene group have different ranges, percentile ranks were used. TFs with cell fate conversion potential are marked with orange. Red dashed lines show the location of control cells.

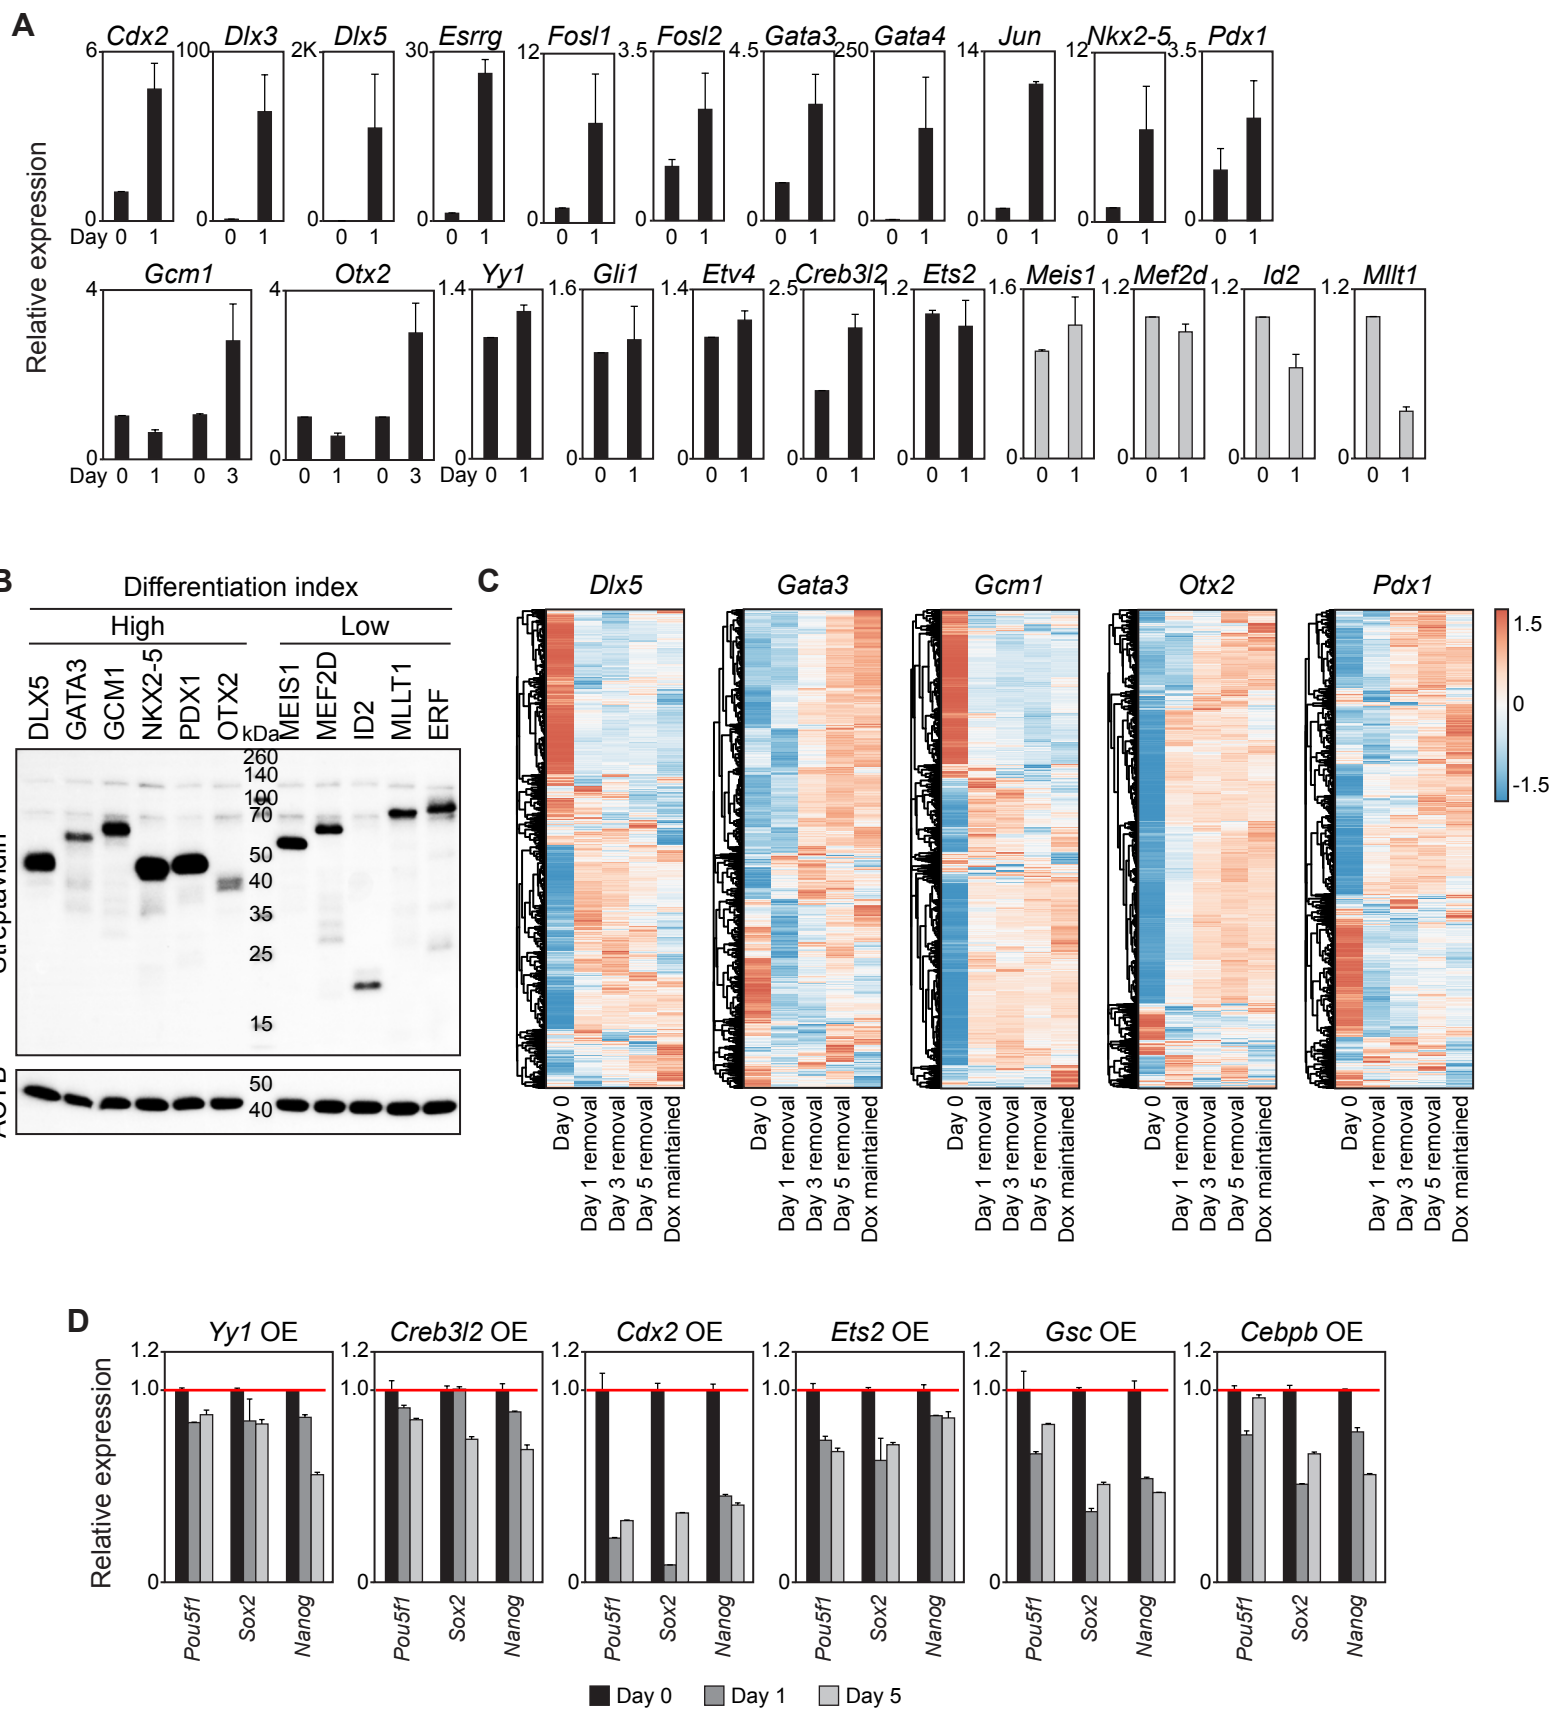



#### **Figure S4. Stable differentiation by induction of potent TFs**

(A) Relative expression of the endogenous TF following the overexpression of the ectopic TF with high and low differentiation index. Individual TFs were induced by the addition of doxycycline (Dox, 0.5 µg/ml) for 1 day or 3 days, and the measurements were performed using RT-qPCR. Non-treated cells (Day 0) were used as the control. Error bars indicate mean  $\pm$  SD (n = 2).

(B) Western blot analysis of expression levels for ectopically expressed TFs by doxycycline treatment (Dox, 0.5 µg/ml) for 2 days. The asterisk (\*) denotes non-specific bands.

(C) Heatmaps showing clustering analysis results for genes exhibiting higher expression variance (total 3,000) upon induction of each TF. Cells were treated with doxycycline (Dox, 0.5 µg/ml) for 1, 3, or 5 days, followed by Dox removal, and then maintained for a total of 7 days. Non-treated cells (Day 0) and cells maintained with Dox for 7 days (Dox maintained) were used as controls. The values represent Z-scores (standard scores) of each gene's expressions across conditions.

(D) Relative expression of pluripotency markers, *Pou5f1*, *Sox2*, and *Nanog*, in cells following 1 day or 5 days of induction of indicated ectopic TFs using Dox (0.5 µg/ml), as measured by RT-qPCR. Non-treated cells (Dox 0) were used as the control. Error bars indicate mean  $\pm$  SD (n = 2).

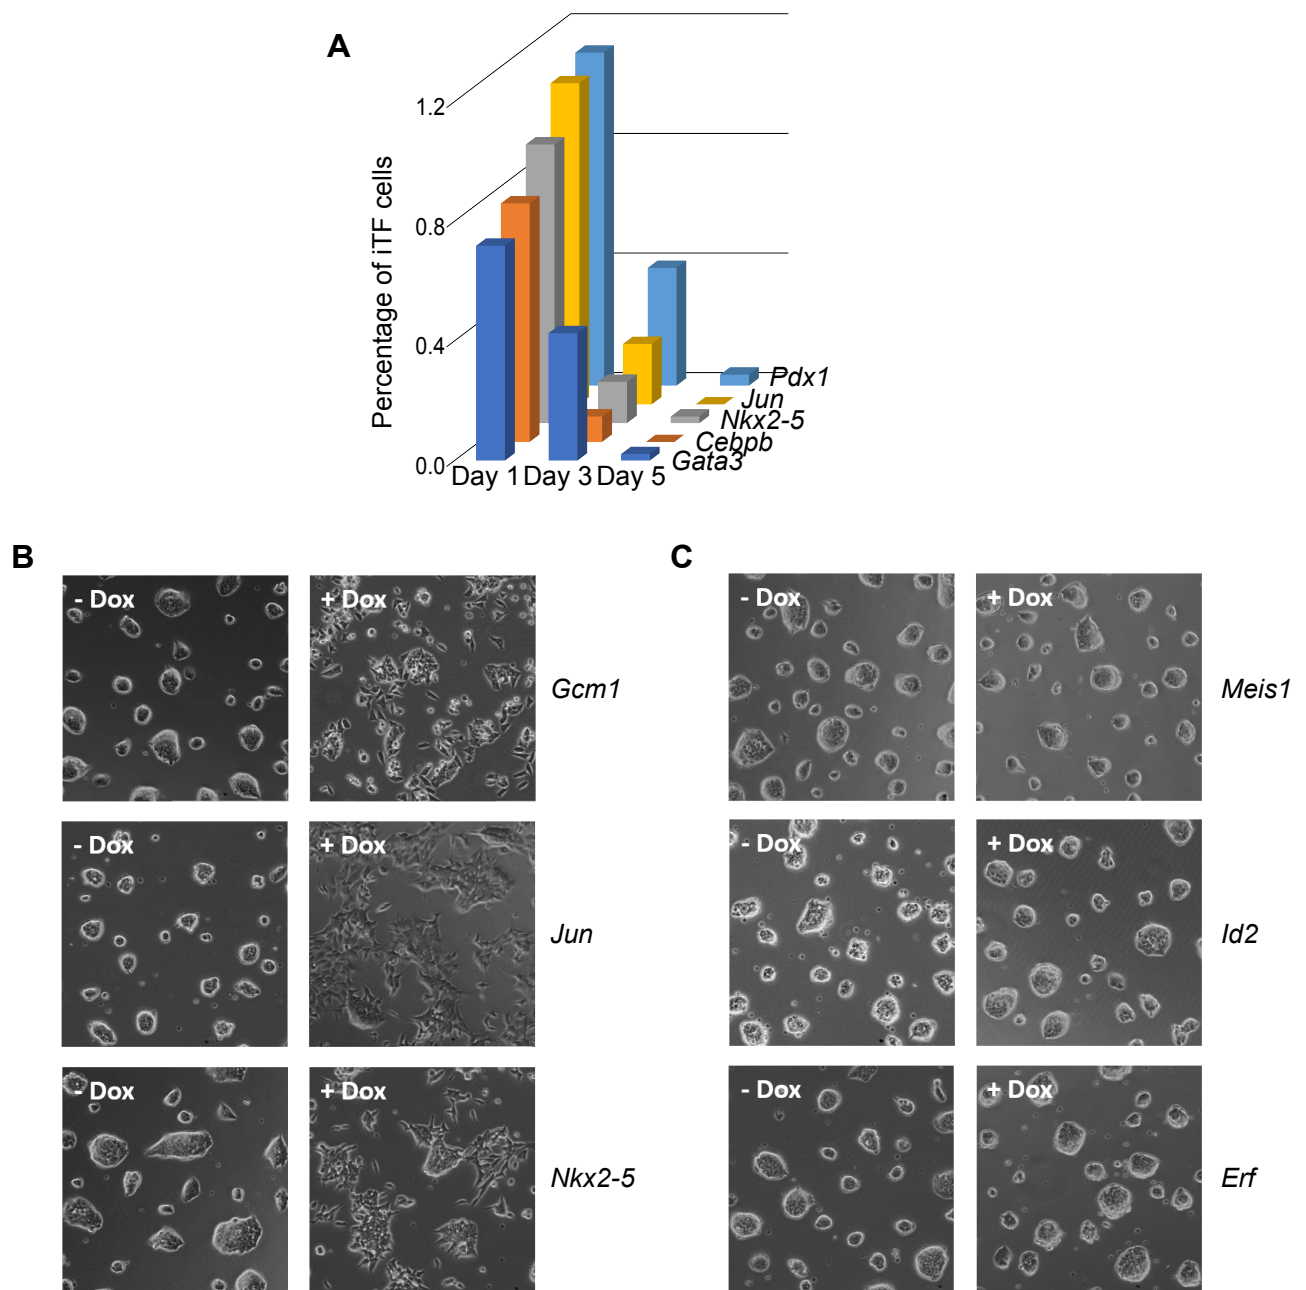

**Figure S5. TF induction and cell morphology**

(A) Changes in percentage of cell populations expressing indicated TFs among all cells upon induction.  
 (B) Rapid changes in ES cell morphology upon induction of representative TFs (1 day) with high differentiation index shown in Fig. 3A.  
 (C) Cell morphology upon induction of TFs with low differentiation index (1 day).



**Figure S6. Rapid induction of TFs alters transcriptome dynamics and activates lineage marker genes**

(A) Heatmaps illustrate the expression profiles of cells overexpressing individual TFs at different time points. Cells were treated with doxycycline (Dox, 0.5  $\mu\text{g/ml}$ ) for 3h, 6h, 12h, 1 day, 3 days, or 5 days, and subsequent transcriptome profiling was performed via RNA-seq. Non-treated cells (0h) were used as the control. The values represent Z-scores (standard scores) of each gene's expressions across conditions.

(B, C) Relative expression levels of lineage markers associated with Dlx3/Dlx4/Dlx5 family TFs (B) and Nkx2-1/Nkx2-5 family TFs (C). Measurements were conducted in cells overexpressing each TF indicated TFs, induced by treating with doxycycline (Dox, 0.5  $\mu\text{g/ml}$ ) for 2 days, as measured by RT-qPCR. Non-treated cells (-Dox) were used as the control. Error bars indicate mean  $\pm$  SD ( $n = 2$ ). Statistical significance was determined using Student's t-test (\* $p < 0.05$ , \*\* $p < 0.01$ , \*\*\* $p < 0.001$ ).

(D) Relative expression levels of three germ layers and trophectoderm marker genes in cells upon induction of Jun/Fos family TFs. The induction of individual TFs was achieved by treating cells with doxycycline (Dox, 0.5  $\mu\text{g/ml}$ ) for 2 days. Non-treated cells (-Dox) were used as the control. Error bars indicate mean  $\pm$  SD ( $n = 2$ ).

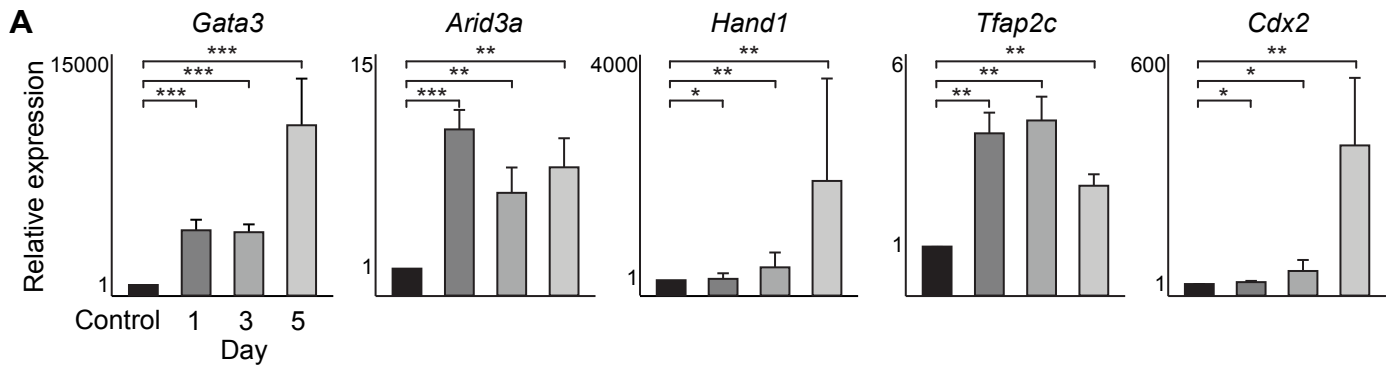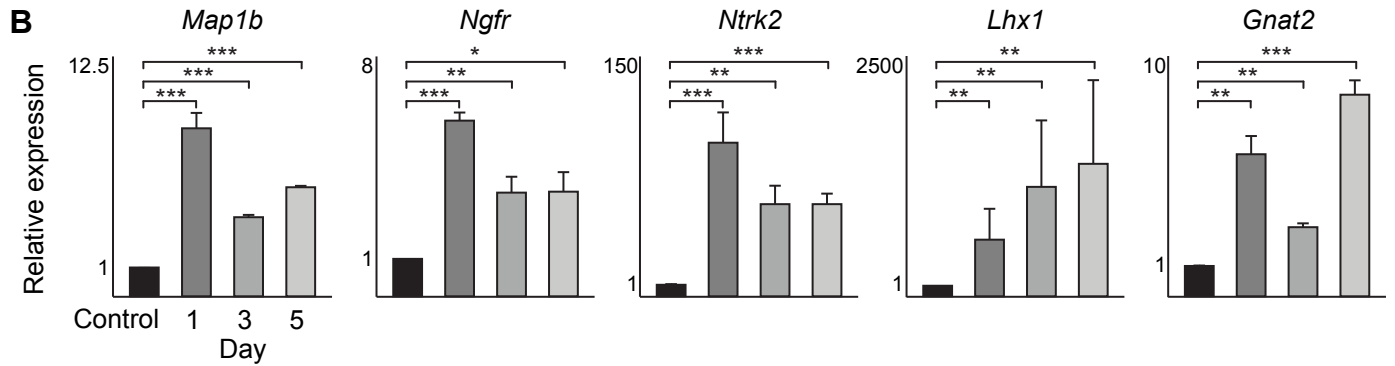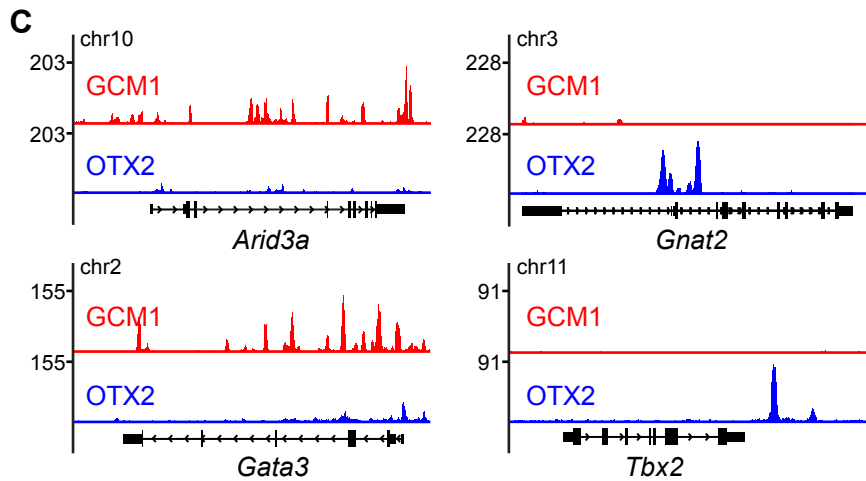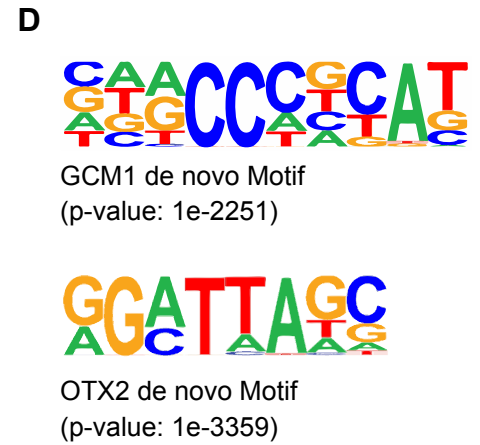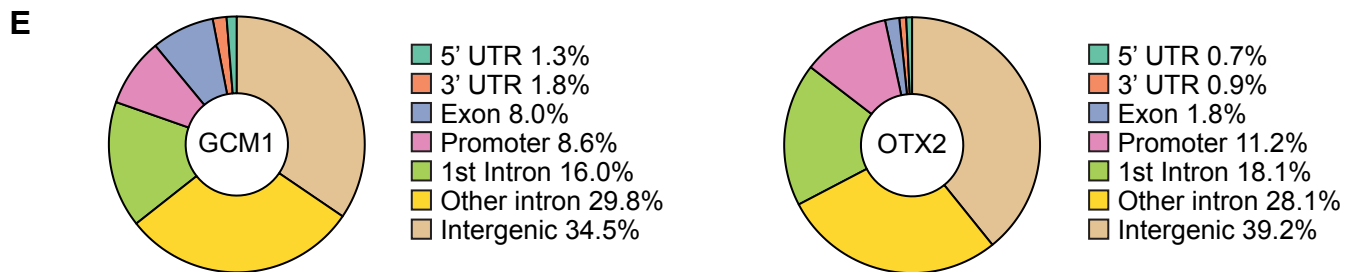

### Figure S7. Gcm1 and Otx2 mediated cell fate conversion

(A, B) Expressions of placenta and trophoblast marker genes in *Gcm1*-overexpressing cells (A) or neurogenesis-related genes in *Otx2*-overexpressing cells (B) compared to control cells. All data are from three independent samples (SEM: \* =  $0.01 < P < 0.05$ , \*\* =  $0.001 < P < 0.01$ , \*\*\* =  $P \leq 0.001$ ).

(C) Representative signal track images depicting occupancy of GCM1 or OTX2 around specific genes. (trophoblast lineage; *Arid3a* and *Gata3*, neuronal lineage; *Gnat2* and *Tbx2*).

(D) De novo motifs of GCM1 and OTX2 top peaks identified by HOMER.

(E) Genomic distributions of GCM1 or OTX2 binding peaks.

**A**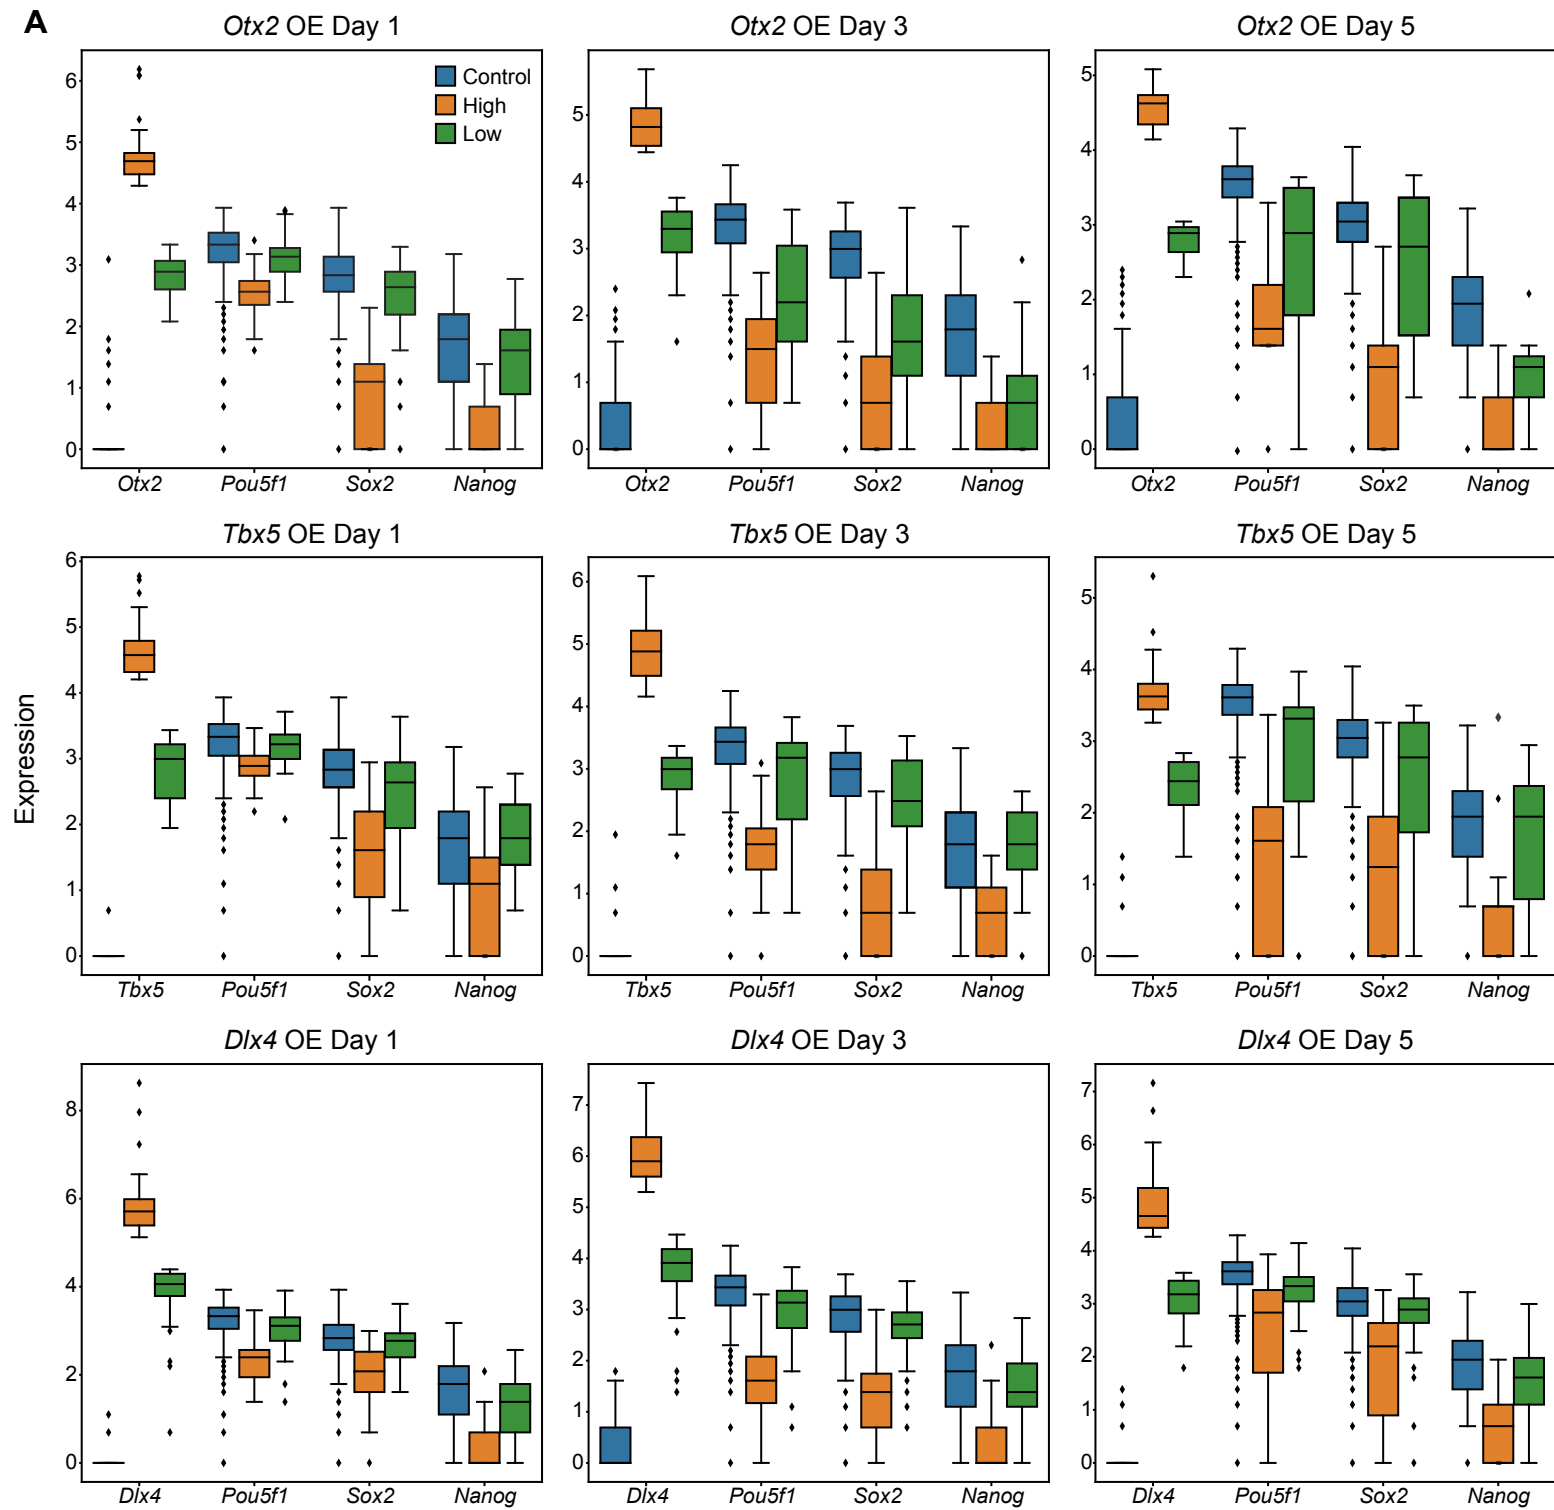**B**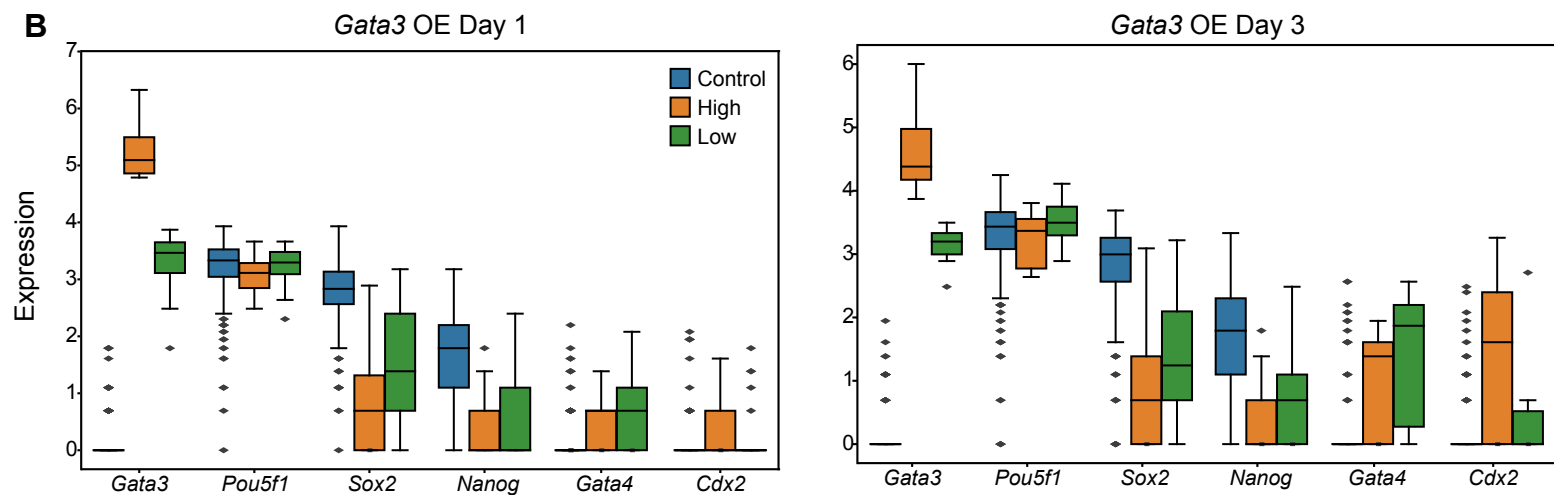

**Figure S8. Variation in pluripotency marker expression based on ectopically expressed TF induction levels**

(A) Graphs illustrating the expression levels (log-normalized count) of pluripotency markers, *Pou5f1*, *Sox2*, and *Nanog*, in cells with varying levels of ectopically expressed TFs indicated. The induced cells are categorized into two groups: high induction (top 33%) and low induction (bottom 33%). Uninduced control cells were used as the baseline for comparison.

(B) The level of ectopic *Gata3* affects *Gata4* (primitive endoderm marker) vs. *Cdx2* (trophectoderm marker) expression.
