# Supplementary material for: Systematic mapping of TF-mediated cell fate changes by a pooled induction coupled with scRNA-seq and multi-omics approaches
Source: Genome Res. 2024 Mar;34(3):484–97. doi: 10.1101/gr.277926.123 (PMC11067882; doi:10.1101/gr.277926.123)
Supplement: Supplement 1 [file Supplemental_Table_S1.xlsx]

## Sheet: Table S1
Table S1. List of the 80 transcription factors
No.	Symbol	Name	Known cell-type-changing function (OE of a single TF)	Known cell-type-changing function (OE of multiple TFs)	TFs inducing hPSC differentiation (Ng et al., 2020. PMID: 33257861)	CellMarker (Zhang et al., 2019. PMID: 30289549), TissueType; Cell Type
1	Gata6	GATA binding protein 6	Extraembryonic endoderm stem cells (PMID: 11937486, 26109048)			Lung; Epithelial cell, Embryo; Endoderm cell
2	Gata4	GATA binding protein 4	Extraembryonic endoderm stem cells (PMID: 11937486, 19850025)	Cardiomyocyte-like cells (PMID: 22522929, 22660318, 29276141)		Liver; Liver stem cell, Embryo; Endoderm cell, Cardiomyocyte
3	Pdx1	pyruvate dehydrogenase complex, component X	Pancreas-like cell (PMID: 19056911)			Pancreas; Alpha cell, Beta cell
4	Cited1	Cbp/p300-interacting transactivator with Glu/Asp-rich carboxy-terminal domain 1	Trophoblast-like cells (PMID: 30206204)			Mammary gland; Hormone sensing progenitor, Hormone sensing differentiated cell
5	Cdx2	caudal type homeobox 2	Trophoblast stem cells (PMID: 16325584, 25625326)			Embryo; Extraembryonic cell, Intestinal crypt; Enteroendocrine precursor cell
6	Gli1	GLI-Kruppel family member GLI1	Floor plate progenitor cells from human embryonic stem cells (PMID: 20799336)		V	Adipose tissue; NA, Brain; Ventral otocyst, Lung; NA
7	Arid3a	AT rich interactive domain 3A (BRIGHT-like)	Trophoblast stem-like cells (PMID: 25319825)			Bone marrow; Stage I neutrophil
8	Gata3	GATA binding protein 3	Trophoblast cells (PMID: 20081188)	Trophoblast stem cells (PMID: 26412560)		Undefined; Natural killer cell, T helper2 (Th2) cell, Bone marrow; Hematopoietic stem cell, Brain; Type II spiral ganglion neuron, Kidney; Mesangial cell
9	Elf5	E74-like factor 5	Trophoblast stem cells (PMID: 26584622)		V	Lung; Epithelial cell, Kidney; Collecting duct principal cell
10	Nkx2-5	NK2 homeobox 5	Cardiomyocyte-like cells (PMID: 26898431)			Embryo; Mesoderm cell
11	Tfap2c	transcription factor AP-2, gamma	Trophoblast stem cells (PMID: 26584622)	Trophoblast stem cells (PMID: 26412560)
12	Fosl1	fos-like antigen 1	Trophoblast stem-like cells (PMID: 29272857)		V
13	Zfp36l1	zinc finger protein 36, C3H type-like 1	Osteoblastic cells (PMID: 28206953)			Adipose tissue; NA
14	Nkx2-1	NK2 homeobox 1		Thyroid follicular cells with Pax8 oeverexpression (PMID: 23051751)		Lung; Epithelial cell
15	Tbx5	T-box 5		Cardiomyocyte-like cells (PMID: 22522929, 22660318, 29276141)		Lung; Smooth muscle cell, Myofibroblast, Retina; NA
16	Gsc	goosecoid homeobox				Adipose tissue; NA
17	Id2	inhibitor of DNA binding 2			V	Trachea; Neuroendocrine cell, Lung; Epithelial cell, Brush cell (Tuft cell), Kidney; Collecting duct intercalated cell, Collecting duct principal cell, Collecting duct principal cell, Intestinal crypt; Goblet cell, Brain; Type II spiral ganglion neuron, Bergmann glial cell, Bone marrow; Dendritic cell, Undefined; Effector T cell, Natural killer cell
18	Ets2	E26 avian leukemia oncogene 2, 3' domain		Cardiac progenitors (PMID: 22826236), Trophoblast stem cells (PMID: 26412560)		Trachea; Neuroendocrine cell
19	Jun	jun proto-oncogene				Lung; Myofibroblast, Intestinal crypt; Enteroendocrine precursor cell, Brush cell (Tuft cell), Brain; Type I spiral ganglion neuron, Bone; Hematopoietic stem cell progenitor cell, Adipose tissue; NA
20	Fos	FBJ osteosarcoma oncogene				Bone; Osteoclast, Hematopoietic stem cell progenitor cell, Intestinal crypt; Enteroendocrine cell, Kidney; Neutrophil
21	Otx2	orthodenticle homeobox 2			V	Brain; Ventral otocyst
22	Hand1	heart and neural crest derivatives expressed 1				Embryo; Mesoderm cell, Cardiomyocyte
23	Tbx20	T-box 20				Embryo; Cardiomyocyte
24	Meis1	Meis homeobox 1			V	Embryo; Pre-hematopoietic stem cell, Brain; Bergmann glial cell, Bone marrow; Hematopoietic stem cell, Megakaryocyte, Bone; Hematopoietic stem cell
25	Id1	inhibitor of DNA binding 1, HLH protein			V	Bone marrow; Stage I neutrophil, Brain; Type II spiral ganglion neuron, Kidney; Vascular endothelial cell, Trachea; Basal cell
26	Cited2	Cbp/p300-interacting transactivator, with Glu/Asp-rich carboxy-terminal domain, 2				Bone marrow; Megakaryocyte, Brain; Type I spiral ganglion neuron, Kidney; Mesangial cell, Lung; Brush cell (Tuft cell)
27	Creb3	cAMP responsive element binding protein 3				Spleen; Plasmacytoid dendritic cell
28	Hmgn2	predicted gene, 20379				Brain; Type II spiral ganglion neuron, Trachea; Cycling basal cell
29	Tcf7	transcription factor 7, T cell specific				Blood; Activated CD8+ T cell, CD4+ T cell, CD8+ T cell, Dendritic cell, Induced regulatory T (Treg) cell, Regulatory T (Treg) cell
30	Npm1	nucleophosmin 1				Intestinal crypt; Transit amplifying (TA) cell
31	Rbfox2	RNA binding protein, fox-1 homolog (C. elegans) 2				Intestinal crypt; Enteroendocrine precursor cell
32	Hdac2	histone deacetylase 2				Brain; Type I spiral ganglion neuron, Intestinal crypt; Enteroendocrine precursor cell
33	Esrrg	estrogen-related receptor gamma				Brain; Basket cell, Type I spiral ganglion neuron
34	Max	Max protein			V	Brain; Type I spiral ganglion neuron
35	Psmc3	proteasome (prosome, macropain) 26S subunit, ATPase 3				Kidney; Podocyte
36	Rbpj	recombination signal binding protein for immunoglobulin kappa J region				Undefined; Memory B cell, Adipose tissue; NA, Brain; Macrophage, Kidney; Macrophage
37	Dlx5	distal-less homeobox 2			V	Brain; Dorsal otocyst, Neuroblast
38	Vgll3	vestigial like family member 3				Adipose tissue; NA
39	Rybp	RING1 and YY1 binding protein				Brain; Type II spiral ganglion neuron, Intestinal crypt; Enteroendocrine precursor cell
40	Trim25	tripartite motif-containing 25				Brain; Type II spiral ganglion neuron
41	Hopx	HOP homeobox				Brain; Martinotti cell, Type IC spiral ganglion neuron, Intestinal crypt; Enteroendocrine cell, Kidney; Mesangial cell, Lung; Epithelial cell, Type I pneumocyte, Spleen; Natural killer cell
42	Yap1	yes-associated protein 1				Brain; Olfactory ensheathing glia
43	Wwtr1	WW domain containing transcription regulator 1				Bone marrow; Hematopoietic stem cell, Brain; Endothelial cell
44	Cebpb	CCAAT/enhancer binding protein (C/EBP), beta				Adipose tissue; NA, Bone marrow; Monocyte
45	Creb3l2	cAMP responsive element binding protein 3-like 2				Kidney; Podocyte, Retina; NA
46	Rbpjl	recombination signal binding protein for immunoglobulin kappa J region-like				Lung; Epithelial cell
47	Tsc22d3	TSC22 domain family, member 3			V	Brain; Type I spiral ganglion neuron
48	Taf6	TATA-box binding protein associated factor 6
49	Mef2d	myocyte enhancer factor 2D
50	Med26	mediator complex subunit 26
51	E2f5	E2F transcription factor 5
52	Pax9	paired box 9
53	Dlx3	distal-less homeobox 3			V
54	Vgll4	vestigial like family member 4
55	Fosl2	fos-like antigen 2
56	Dlx4	distal-less homeobox 4
57	Snai1	snail family zinc finger 1
58	Fbxl19	F-box and leucine-rich repeat protein 19
59	Zfp13	zinc finger protein 13
60	Smarce1	SWI/SNF related, matrix associated, actin dependent regulator of chromatin, subfamily e, member 1
61	Pou2f1	POU domain, class 2, transcription factor 1
62	Tcea1	transcription elongation factor A (SII) 1
63	Pole3	polymerase (DNA directed), epsilon 3 (p17 subunit)
64	Hdac1	histone deacetylase 1
65	Dnajb6	DnaJ heat shock protein family (Hsp40) member B6
66	Tfdp1	transcription factor Dp 1			V
67	Etv4	ets variant 4
68	Polr2e	polymerase (RNA) II (DNA directed) polypeptide E
69	Smarcb1	SWI/SNF related, matrix associated, actin dependent regulator of chromatin, subfamily b, member 1
70	Dpf1	double PHD fingers 1			V
71	Tgif1	TGFB-induced factor homeobox 1
72	Mllt1	myeloid/lymphoid or mixed-lineage leukemia; translocated to, 1
73	Arnt	aryl hydrocarbon receptor nuclear translocator
74	Gcm1	glial cells missing homolog 1
75	Tle3	transducin-like enhancer of split 3
76	Maff	v-maf musculoaponeurotic fibrosarcoma oncogene family, protein F (avian)
77	Mafk	v-maf musculoaponeurotic fibrosarcoma oncogene family, protein K (avian)			V
78	Yy1	YY1 transcription factor
79	Foxn2	forkhead box N2			V
80	Erf	Ets2 repressor factor
