# Supplementary material for: Systematic mapping of TF-mediated cell fate changes by a pooled induction coupled with scRNA-seq and multi-omics approaches
Source: Genome Res. 2024 Mar;34(3):484–97. doi: 10.1101/gr.277926.123 (PMC11067882; doi:10.1101/gr.277926.123)
Supplement: Supplement 2 [file Supplemental_Table_S2.xlsx]

## Sheet: Table S2
Table S2. Summary of detected cells with iTF expression
iTF	Number of detected cells			Percentage of detected cells among all cells
	day1	day3	day5	day1	day3	day5
Arid3a	74	58	48	0.932225	1.01505	0.607441
Arnt	42	49	101	0.529101	0.857543	1.27816
Cdx2	30	3	0	0.377929	0.0525026	0
Cebpb	101	8	0	1.27236	0.140007	0
Cited1	216	215	333	2.72109	3.76269	4.21412
Cited2	220	220	443	2.77148	3.85019	5.60618
Creb3	168	142	105	2.1164	2.48512	1.32878
Creb3l2	152	43	17	1.91484	0.752538	0.215135
Dlx3	93	33	15	1.17158	0.577529	0.189825
Dlx4	202	235	202	2.54472	4.11271	2.55631
Dlx5	34	7	0	0.428319	0.122506	0
Dnajb6	44	64	57	0.554296	1.12006	0.721336
Dpf1	97	111	144	1.22197	1.9426	1.82232
E2f5	132	100	135	1.66289	1.75009	1.70843
Elf5	170	37	20	2.1416	0.647532	0.2531
Erf	151	211	370	1.90224	3.69268	4.68236
Esrrg	65	54	49	0.818846	0.945047	0.620096
Ets2	137	64	56	1.72588	1.12006	0.708681
Etv4	158	75	79	1.99043	1.31257	0.999747
Fbxl19	92	64	81	1.15898	1.12006	1.02506
Fos	72	20	2	0.907029	0.350018	0.02531
Fosl1	147	101	103	1.85185	1.76759	1.30347
Fosl2	75	45	34	0.944822	0.787539	0.430271
Foxn2	79	39	30	0.995213	0.682534	0.379651
Gata3	91	40	3	1.14638	0.700035	0.0379651
Gata4	85	9	2	1.0708	0.157508	0.02531
Gata6	0	0	0	0	0	0
Gcm1	90	5	0	1.13379	0.0875044	0
Gli1	74	38	33	0.932225	0.665033	0.417616
Gsc	39	2	0	0.491308	0.0350018	0
Hand1	150	73	174	1.88964	1.27756	2.20197
Hdac1	95	79	74	1.19678	1.38257	0.936472
Hdac2	17	30	28	0.21416	0.525026	0.354341
Hmgn2	155	119	204	1.95263	2.0826	2.58162
Hopx	295	298	477	3.7163	5.21526	6.03645
Id1	120	154	204	1.51172	2.69513	2.58162
Id2	219	239	519	2.75888	4.18271	6.56796
Jun	136	19	0	1.71328	0.332517	0
Maff	18	5	0	0.226757	0.0875044	0
Mafk	4	2	0	0.0503905	0.0350018	0
Max	148	144	159	1.86445	2.52013	2.01215
Med26	77	74	70	0.970018	1.29506	0.885852
Mef2d	78	71	181	0.982615	1.24256	2.29056
Meis1	63	73	143	0.793651	1.27756	1.80967
Mllt1	60	85	148	0.755858	1.48757	1.87294
Nkx2-1	98	12	0	1.23457	0.210011	0
Nkx2-5	118	13	3	1.48652	0.227511	0.0379651
Npm1	30	24	43	0.377929	0.420021	0.544166
Otx2	105	97	29	1.32275	1.69758	0.366996
Pax9	166	13	1	2.09121	0.227511	0.012655
Pdx1	141	37	5	1.77627	0.647532	0.0632751
Pole3	163	109	207	2.05341	1.9076	2.61959
Polr2e	99	85	115	1.24717	1.48757	1.45533
Pou2f1	55	32	12	0.69287	0.560028	0.15186
Psmc3	101	77	150	1.27236	1.34757	1.89825
Rbfox2	75	7	2	0.944822	0.122506	0.02531
Rbpj	86	83	144	1.0834	1.45257	1.82232
Rbpjl	159	145	239	2.00302	2.53763	3.02455
Rybp	110	83	104	1.38574	1.45257	1.31612
Smarcb1	88	53	134	1.10859	0.927546	1.69577
Smarce1	86	86	118	1.0834	1.50508	1.49329
Snai1	200	204	409	2.51953	3.57018	5.1759
Taf6	55	46	87	0.69287	0.80504	1.10099
Tbx20	107	59	56	1.34795	1.03255	0.708681
Tbx5	119	103	66	1.49912	1.80259	0.835232
Tcea1	91	78	117	1.14638	1.36507	1.48064
Tcf7	132	128	172	1.66289	2.24011	2.17666
Tfap2c	29	0	1	0.365331	0	0.012655
Tfdp1	65	63	98	0.818846	1.10256	1.24019
Tgif1	123	84	68	1.54951	1.47007	0.860542
Tle3	4	1	2	0.0503905	0.0175009	0.02531
Trim25	65	48	98	0.818846	0.840042	1.24019
Tsc22d3	96	68	43	1.20937	1.19006	0.544166
Vgll3	118	99	204	1.48652	1.73259	2.58162
Vgll4	91	113	197	1.14638	1.9776	2.49304
Wwtr1	0	0	0	0	0	0
Yap1	0	0	0	0	0	0
Yy1	61	10	1	0.768456	0.175009	0.012655
Zfp13	95	92	132	1.19678	1.61008	1.67046
Zfp36l1	42	5	2	0.529101	0.0875044	0.02531
total	7938	5714	7902	100	100	100
