# Supplementary material for: Systematic mapping of TF-mediated cell fate changes by a pooled induction coupled with scRNA-seq and multi-omics approaches
Source: Genome Res. 2024 Mar;34(3):484–97. doi: 10.1101/gr.277926.123 (PMC11067882; doi:10.1101/gr.277926.123)
Supplement: Supplement 3 [file Supplemental_Table_S3.xlsx]

## Sheet: Sheet1
Table S3. Proportion of cells in the separated clusters
iTF	Cells in separted clusters (%)
	Day 1	Day 3	Day 5
Arid3a	2.7027	0	8.33333
Arnt	2.38095	0	6.93069
Cdx2	86.6667	100	NA
Cebpb	2.9703	0	NA
Cited1	84.7222	90.6977	87.6877
Cited2	4.09091	2.72727	3.16027
Control	18.5022	23.0392	11.7895
Creb3	1.78571	4.92958	2.85714
Creb3l2	2.63158	2.32558	5.88235
Dlx3	100	90.9091	80
Dlx4	91.0891	96.1702	93.0693
Dlx5	97.0588	100	NA
Dnajb6	2.27273	0	0
Dpf1	6.18557	6.30631	4.16667
E2f5	5.30303	5	3.7037
Elf5	94.1176	97.2973	95
Erf	3.97351	3.79147	3.51351
Esrrg	3.07692	11.1111	24.4898
Ets2	43.7956	32.8125	32.1429
Etv4	73.4177	80	48.1013
Fbxl19	2.17391	3.125	2.46914
Fos	98.6111	100	100
Fosl1	78.2313	94.0594	94.1748
Fosl2	80	95.5556	94.1176
Foxn2	3.79747	5.12821	3.33333
Gata3	86.8132	92.5	100
Gata4	95.2941	100	100
Gcm1	97.7778	80	NA
Gli1	52.7027	47.3684	30.303
Gsc	64.1026	50	NA
Hand1	70.6667	87.6712	80.4598
Hdac1	1.05263	3.79747	2.7027
Hdac2	0	3.33333	7.14286
Hmgn2	3.87097	6.72269	5.39216
Hopx	4.74576	4.02685	2.72537
Id1	1.66667	2.5974	1.96078
Id2	2.28311	2.09205	1.7341
Jun	97.7941	94.7368	NA
Maff	16.6667	0	NA
Mafk	25	0	NA
Max	4.72973	3.47222	2.51572
Med26	5.19481	5.40541	7.14286
Mef2d	1.28205	5.6338	1.65746
Meis1	4.7619	5.47945	6.29371
Mllt1	8.33333	4.70588	2.02703
Nkx2-1	91.8367	91.6667	NA
Nkx2-5	95.7627	84.6154	0
Npm1	0	8.33333	9.30233
Otx2	62.8571	89.6907	79.3103
Pax9	92.1687	84.6154	100
Pdx1	87.9433	97.2973	80
Pole3	1.84049	8.25688	2.89855
Polr2e	1.0101	8.23529	2.6087
Pou2f1	5.45455	3.125	8.33333
Psmc3	0	2.5974	2.66667
Rbfox2	4	0	0
Rbpj	2.32558	2.40964	3.47222
Rbpjl	3.77358	7.58621	3.76569
Rybp	7.27273	3.61446	5.76923
Smarcb1	1.13636	0	5.97015
Smarce1	3.48837	4.65116	6.77966
Snai1	2	3.92157	1.22249
Taf6	5.45455	4.34783	2.29885
Tbx20	10.2804	6.77966	26.7857
Tbx5	89.0756	88.3495	75.7576
Tcea1	1.0989	2.5641	1.7094
Tcf7	3.0303	3.90625	3.48837
Tfap2c	48.2759	NA	0
Tfdp1	1.53846	1.5873	5.10204
Tgif1	2.43902	1.19048	2.94118
Tle3	25	0	0
Trim25	3.07692	2.08333	1.02041
Tsc22d3	1.04167	4.41176	4.65116
Vgll3	2.54237	12.1212	11.7647
Vgll4	1.0989	0.884956	2.53807
Yy1	3.27869	0	0
Zfp13	7.36842	0	5.30303
Zfp36l1	9.52381	0	0
