# Supplementary material for: Systematic mapping of TF-mediated cell fate changes by a pooled induction coupled with scRNA-seq and multi-omics approaches
Source: Genome Res. 2024 Mar;34(3):484–97. doi: 10.1101/gr.277926.123 (PMC11067882; doi:10.1101/gr.277926.123)
Supplement: Supplement 4 [file Supplemental_Table_S4.xlsx]

## Sheet: Day 1
Table S4. Pseudo-bulk RNA-seq data
Gene	Control	Arid3a	Arnt	Cdx2	Cebpb	Cited1	Cited2	Creb3	Creb3l2	Dlx3	Dlx4	Dlx5	Dnajb6	Dpf1	E2f5	Elf5	Erf	Esrrg	Ets2	Etv4	Fbxl19	Fos	Fosl1	Fosl2	Foxn2	Gata3	Gata4	Gcm1	Gli1	Gsc	Hand1	Hdac1	Hdac2	Hmgn2	Hopx	Id1	Id2	Jun	Maff	Mafk	Max	Med26	Mef2d	Meis1	Mllt1	Nkx2-1	Nkx2-5	Npm1	Otx2
44621	0.00305351	0	0	0.0462098	0	0.00641803	0	0	0.00912036	0.0223596	0.00343142	0	0	0	0	0	0	0	0.00505947	0.00877401	0	0	0	0	0	0	0	0.0616131	0.00936685	0.017773	0	0	0	0	0.00234965	0	0	0.01529	0.0385082	0	0	0	0	0	0	0	0	0	0
44621	0.00305351	0.0187337	0	0.0231049	0	0.0128361	0.00945201	0.00412588	0.00456018	0.0149064	0.00343142	0	0.0157533	0.00714585	0.0105022	0.024464	0.0137711	0.0106638	0.00505947	0	0.00753421	0.00962704	0	0.00924196	0	0	0.00815467	0	0.0281006	0.017773	0.00924196	0.0218889	0	0.0134158	0.0117483	0.00577623	0.00633011	0.00509667	0	0	0.00468343	0.0270057	0.0088865	0	0	0	0.0176224	0	0.0066014
44622	1.24934	1.10664	1.19853	0.941949	1.35973	1.17544	1.17523	1.28829	1.40938	1.11221	1.23022	1.15855	1.18942	1.2379	1.29985	0.925985	1.25978	1.23119	0.942395	1.19438	0.991394	1.58645	1.35396	1.28245	1.43458	1.45493	1.69332	1.35296	1.52011	1.4049	1.13999	1.22518	1.43953	1.18644	1.18145	1.20928	1.20991	1.65185	1.53165	1.52731	1.20665	1.14353	1.13629	1.21478	1.34504	2.01972	1.77969	1.15894	1.12909
44622	0.332384	0.372226	0.458053	0.334833	0.373576	0.383519	0.385998	0.365578	0.382564	0.519788	0.391255	0.467361	0.487169	0.355004	0.394734	0.317732	0.386814	0.514494	0.333553	0.242446	0.42519	0.404352	0.373848	0.410497	0.447489	0.413024	0.341883	0.397301	0.343573	0.368877	0.334719	0.414791	0.36696	0.351513	0.435541	0.342326	0.364824	0.509477	0.314609	0.346574	0.350806	0.328658	0.387492	0.373252	0.324563	0.336832	0.41474	0.437256	0.302672
44623	0.0170537	0.0281006	0	0.142556	0.00686284	0.0128361	0.0157533	0.00412588	0.039149	0.0298128	0.0137257	0.0407734	0.0157533	0.00714585	0.00525112	0.0203867	0.0275423	0.0213276	0.0151784	0.00877401	0.0301368	0	0	0	0.00877401	0.007617	0	0.0154033	0	0.035546	0.00924196	0.0218889	0.0407734	0.0134158	0.00704895	0.0115525	0.0176767	0.01529	0	0	0.00742306	0.0270057	0.0088865	0.0110023	0.0231049	0.0141459	0.0504292	0	0.0170644
44624	0	0	0	0	0	0	0	0	0	0	0.00343142	0	0	0	0	0	0	0	0	0	0	0	0.00471529	0	0	0	0	0	0	0	0	0	0	0	0.00234965	0	0	0	0	0	0	0	0	0	0	0	0.0117483	0	0
44625	1.37533	1.21627	1.44403	1.62957	1.41043	1.42307	1.42881	1.21793	1.43049	1.46719	1.5672	1.53207	1.05371	1.36119	1.29078	1.30862	1.28065	1.2223	1.44137	1.59794	1.22235	1.18345	1.29739	1.35451	1.324	1.21306	1.52183	1.19998	1.57693	1.3259	1.30172	1.31564	1.47277	1.2921	1.21458	1.27464	1.22189	1.545	1.01795	1.02359	1.44201	1.42772	1.43118	1.37703	1.43573	1.63624	1.61851	1.20173	1.43074
44626	0.415637	0.536237	0.510368	0.606428	0.413587	0.533263	0.465655	0.514426	0.506701	0.626226	0.504503	0.671228	0.569541	0.440216	0.476976	0.609482	0.468234	0.528539	0.471878	0.520305	0.396198	0.564755	0.441295	0.449686	0.432923	0.380999	0.417914	0.290787	0.427875	0.531854	0.49779	0.374042	0.479286	0.528548	0.471267	0.464618	0.466468	0.633154	0.446116	0.549306	0.465266	0.435327	0.459252	0.492426	0.454284	0.462029	0.450887	0.52575	0.425359
44627	1.53387	1.63919	1.69454	1.90028	1.51478	1.68244	1.63869	1.55364	1.48757	1.54247	1.62813	1.72429	1.5034	1.56129	1.61547	1.43623	1.58848	1.50301	1.55214	1.51538	1.45142	1.58815	1.64961	1.54423	1.64091	1.43032	1.48077	1.77365	1.65842	1.69521	1.69688	1.46437	1.41069	1.56505	1.53732	1.56952	1.57773	1.64071	1.56535	1.47153	1.63269	1.45224	1.60976	1.57744	1.56172	1.49972	1.50191	1.52611	1.55745
44628	0.0615891	0.145982	0.141682	0.0828302	0.211066	0.167959	0.12579	0.146819	0.26303	0.17705	0.106957	0.256566	0.25473	0.168535	0.0901613	0.119249	0.12472	0.10845	0.19312	0.128306	0.0872835	0.0730208	0.146975	0.145606	0.0350961	0.147312	0.205253	0.0706234	0.117882	0.251842	0.122849	0.109444	0.12232	0.122262	0.124313	0.145387	0.12714	0.268491	0.115525	0	0.0823579	0.213839	0.088865	0.133898	0.117488	0.217527	0.212025	0.138629	0.162295
44629	0.342742	0.401366	0.276514	0.161734	0.21508	0.365052	0.377194	0.324555	0.307089	0.251021	0.352926	0.186944	0.288914	0.295957	0.357977	0.13186	0.385336	0.300399	0.162763	0.271335	0.347287	0.349122	0.299112	0.254244	0.333427	0.211409	0.255566	0.168857	0.123361	0.379273	0.214136	0.299839	0.390811	0.383576	0.350551	0.29034	0.309999	0.398249	0.231049	0.173287	0.338094	0.274646	0.351104	0.305369	0.299495	0.294266	0.341707	0.290774	0.229431
44630	0	0	0	0	0.00686284	0	0	0	0	0	0.00686284	0	0	0	0	0	0	0	0	0	0	0.00962704	0.00943057	0	0	0	0	0.00770164	0	0	0	0	0	0	0	0	0	0.0386581	0	0	0	0	0	0	0	0	0.00587413	0	0
44631	0.0414818	0.0897809	0.0495105	0.0231049	0.0205885	0.0339673	0.0365004	0.0825175	0.0756304	0.120518	0.048623	0.195406	0.0315067	0.0428751	0.0787667	0.0285414	0.0585498	0	0.0484948	0.0350961	0.0571467	0.0192541	0.0518682	0.0277259	0.0665506	0.0273067	0.0407734	0.00770164	0.024213	0	0.051616	0.0583703	0.129249	0.0383912	0.0577661	0.0577623	0.070169	0.0182714	0	0	0.0562011	0.0540115	0.071092	0.0880187	0.11073	0.0282917	0.00587413	0.0462098	0.033007
44805	1.76067	2.05436	2.07193	1.13479	1.79103	1.71717	1.87524	1.99245	1.71182	0.975098	1.343	0.718027	1.95876	1.78257	2.08156	1.44031	2.11683	1.939	1.51712	1.55272	2.06593	1.98129	2.28833	2.19387	1.8601	0.856607	0.65007	0.809517	1.00622	0.927774	1.84796	2.17183	1.92311	2.08917	2.20008	1.96604	2.10015	0.744028	2.08041	2.83213	2.14648	1.53277	2.03109	1.96009	1.98739	0.675109	0.666775	1.94108	1.20011
44806	0.636952	0.747482	0.742416	0.72063	0.582321	0.824469	0.671592	0.768588	0.864799	0.670826	0.782791	0.999353	0.812303	0.708398	0.661555	0.695419	0.752006	0.754988	0.638675	0.661163	0.675384	0.677024	0.723544	0.608973	0.62099	0.823039	0.648552	0.80612	0.749226	0.952952	0.742024	0.641383	0.77403	0.683663	0.713796	0.725617	0.665164	0.887643	0.808044	0.173287	0.698107	0.870291	0.82665	0.756482	0.62102	0.699227	0.765951	0.69141	0.915626
44807	0.0651615	0.0843017	0.099021	0.142556	0.205369	0.100025	0.154146	0.138567	0.0573897	0.218676	0.15558	0.239643	0.0787667	0.0827844	0.102843	0.116551	0.0459038	0.0808845	0.0818112	0.0778908	0.0797493	0.0962704	0.0782029	0.0885839	0.0753246	0.0850813	0.12709	0.170028	0.00936685	0.183452	0.0462098	0.133813	0.0407734	0.135677	0.107907	0.11073	0.104985	0.06116	0.375643	0.346574	0.0495739	0.0810172	0.143694	0.121026	0.0231049	0.0790041	0.116936	0.115525	0.185961
44808	0.0305351	0.0374674	0.0165035	0.0462098	0.0343142	0.0275493	0.0157533	0.00412588	0.0197088	0.0223596	0.0225958	0	0	0.0357292	0	0.012232	0.0244297	0.0319914	0.0282569	0.013161	0.0226026	0.0288811	0.0169041	0.0277259	0.0350961	0.030468	0.0326187	0.0706234	0.0281006	0.035546	0.0119451	0	0.0407734	0.0134158	0.00939861	0	0.0126602	0.111652	0.0770164	0	0.0140503	0.00900191	0.0266595	0.0440093	0.0231049	0.24115	0.372969	0	0.126548
44809	0	0.00936685	0	0	0.00686284	0.00641803	0.00945201	0.00412588	0.0182407	0	0.00686284	0.0203867	0	0	0.00525112	0.0203867	0	0.0106638	0.00505947	0.00877401	0	0	0	0	0	0.015234	0.024464	0.0693147	0	0	0.00924196	0	0	0	0.0046993	0	0	0.0488514	0	0	0.00468343	0	0	0	0	0.0141459	0.0117483	0	0.0132028
44810	0.170253	0.343406	0.299867	0.271596	0.249395	0.361659	0.19356	0.325641	0.290048	0.413604	0.403882	0.21043	0.270484	0.199546	0.254336	0.240643	0.216528	0.270219	0.263191	0.240547	0.120547	0.165296	0.25783	0.208729	0.286732	0.24001	0.306506	0.0706234	0.164716	0.384676	0.176383	0.212284	0.373889	0.230347	0.217546	0.202715	0.262467	0.329268	0.337135	0.173287	0.152969	0.309124	0.2059	0.223786	0.21187	0.739515	0.785521	0.115525	0.2663
44811	2.34488	2.39997	2.29466	2.72034	2.1417	2.58024	2.37097	2.32401	2.26491	2.59569	2.34043	2.46681	2.34851	2.2399	2.25336	2.50572	2.33334	2.39692	2.46811	2.46126	2.20652	2.88527	2.4725	2.55318	2.29762	2.27181	2.32365	2.61086	2.5627	2.44919	2.3555	2.31909	2.32671	2.24756	2.31818	2.28645	2.28296	2.98263	2.33651	2.17687	2.32927	2.48871	2.36965	2.33601	2.24893	2.46117	2.38465	2.32162	2.35226
44812	0.186429	0.160828	0.193997	0.317805	0.257424	0.318059	0.197483	0.155772	0.272925	0.315567	0.357843	0.361963	0.144457	0.1382	0.195184	0.151554	0.134681	0.176859	0.150544	0.110421	0.106759	0.231961	0.163879	0.291907	0.183595	0.189143	0.206638	0.462439	0.147574	0.275337	0.253459	0.173322	0.170022	0.22326	0.169398	0.145387	0.14852	0.318117	0.115525	0	0.141299	0.153032	0.216296	0.099021	0.19356	0.220463	0.326628	0.0828302	0.309273
44813	0.721578	0.715095	0.675134	0.267669	0.754957	0.772514	0.859209	0.921933	0.678729	0.588133	0.627463	0.398809	0.670523	0.842347	0.879848	0.545365	0.739045	0.549307	0.759434	0.551889	0.771962	1.01918	0.860572	0.689841	0.652947	0.569036	0.477141	1.05568	1.277	1.27154	0.767205	0.722417	0.526988	0.774336	0.797774	0.691325	0.74816	0.546326	0.487582	0.823959	0.676205	0.810688	0.805027	0.720927	0.690826	0.693182	0.712212	0.566296	0.453393
44814	0.344029	0.496138	0.354691	0.467799	0.379161	0.556822	0.432305	0.444981	0.345545	0.503309	0.473295	0.629757	0.517209	0.41084	0.466173	0.542139	0.437391	0.563578	0.58432	0.370085	0.413113	0.467918	0.384273	0.488224	0.246504	0.424697	0.464216	0.155341	0.499642	0.599636	0.544513	0.363717	0.573959	0.453878	0.424189	0.397257	0.415155	0.577832	0.0385082	0.44794	0.407557	0.460642	0.37091	0.4461	0.296664	0.353785	0.390591	0.360089	0.595238
44815	1.74123	1.80258	1.80242	1.84605	1.64714	1.80405	1.67898	1.77998	1.68123	2.12541	1.92804	2.07687	1.70846	1.77364	1.56968	2.01112	1.74851	1.40628	1.89584	1.95247	1.77836	1.90326	1.70386	1.72324	1.82955	1.12272	1.46771	2.6105	2.49051	2.1054	1.78143	1.68801	1.6456	1.73811	1.65065	1.7995	1.75294	2.30801	1.42424	1.35291	1.70596	1.90438	1.77474	1.64822	1.54851	1.72711	1.86196	1.74038	1.50975
44816	0.00305351	0	0	0	0	0	0	0	0	0	0	0	0	0	0	0	0	0	0	0	0	0	0	0	0	0	0	0	0	0	0.00462098	0	0	0	0	0	0	0	0	0	0	0	0	0	0	0	0	0	0
44818	0.00610702	0	0	0	0	0	0.00315067	0	0.00456018	0	0.00686284	0	0	0.00714585	0	0	0	0	0	0	0	0	0	0	0	0	0	0	0	0	0	0.00729629	0	0	0.00234965	0	0	0	0	0	0.00468343	0	0	0	0	0	0	0	0
0610005C13Rik	0.0140002	0	0.0165035	0	0.0137257	0.0160451	0.00630134	0.0123776	0.00456018	0	0.00686284	0.0203867	0.0630134	0.0142917	0.0240762	0.00815467	0.0229519	0	0.0101189	0.0420493	0.00753421	0	0.0141459	0.00924196	0	0.007617	0.024464	0	0.00936685	0.017773	0.00462098	0	0	0.0178877	0.0211469	0.0115525	0.0253204	0.00509667	0.0385082	0	0.0214733	0.00900191	0.017773	0.033007	0.0231049	0.0141459	0.00587413	0	0.118329
0610009B22Rik	0.873741	0.996394	0.893456	0.905211	0.965604	1.02352	1.02881	0.809022	0.906486	0.799234	0.979499	0.989822	1.03581	1.00366	1.02164	0.778665	0.99039	0.963981	0.912948	0.839532	0.906705	0.879149	1.07382	0.872688	0.898592	0.822812	0.753323	0.864474	0.847886	0.974355	0.965727	1.05094	0.99555	1.03039	0.970136	0.977146	0.980875	1.05252	0.873354	0.621227	0.90653	0.832578	1.00907	1.07199	0.860868	0.971283	0.877635	1.13437	0.833797
0610009E02Rik	0.0170537	0	0.0165035	0	0.0274514	0.0192541	0.0126027	0.0371329	0.0399239	0.0521724	0.0308828	0.0407734	0	0.0214375	0.0157533	0.0186944	0.0137711	0.0106638	0.0252973	0.00438701	0.0270099	0.00962704	0.0141459	0.00924196	0	0	0.0163093	0.0430133	0.0187337	0.035546	0.0138629	0.0218889	0	0.0268315	0.0191965	0.0173287	0.0284855	0.0203867	0.0385082	0	0.00468343	0.0270057	0.0088865	0	0.0298627	0.0141459	0.0352448	0.0231049	0.0264056
0610009L18Rik	0.062108	0.0468343	0.0495105	0.0963457	0.10126	0.0481352	0.04726	0.0742658	0.0764053	0.0521724	0.0726429	0.101933	0.0630134	0.0500209	0.0669774	0.0407734	0.0550845	0.0426552	0.0303568	0.0438701	0.0150684	0.0673893	0.0707293	0.0739357	0.0614181	0.045702	0.0733921	0.00770164	0.0897809	0.145204	0.039671	0.0437777	0.0407734	0.051807	0.0446434	0.051986	0.0379807	0.100684	0.0770164	0	0.0636242	0.0592772	0.0088865	0.0440093	0.06452	0.113167	0.0763637	0.0924196	0.0198042
0610010F05Rik	0.217897	0.227988	0.148532	0.281185	0.2099	0.338949	0.23006	0.235566	0.238336	0.377726	0.357002	0.38235	0.245515	0.238241	0.262658	0.242641	0.206222	0.223138	0.266441	0.280776	0.22546	0.349122	0.218506	0.337422	0.235422	0.282551	0.248797	0.222051	0.170195	0.297785	0.198355	0.287035	0.333115	0.170693	0.19658	0.263215	0.20442	0.378811	0.468642	0.173287	0.285697	0.31439	0.312538	0.252226	0.19356	0.238214	0.281517	0.285111	0.241016
0610010K14Rik	1.23721	1.13308	1.31352	1.2981	1.32726	1.25239	1.28681	1.25047	1.33723	1.16233	1.15372	1.06554	1.38656	1.26096	1.2637	1.31451	1.28551	1.13823	1.40322	1.33672	1.20137	1.30512	1.33065	1.42538	1.32903	1.22106	1.03832	1.30591	1.25957	1.2599	1.22459	1.36002	1.28004	1.34279	1.29737	1.33062	1.33194	1.01624	1.19967	1.47153	1.23653	1.33453	1.27011	1.22539	1.28488	1.02791	1.06992	1.18965	0.980885
0610012G03Rik	1.484	1.46843	1.32277	1.09247	1.30005	1.55808	1.54873	1.39627	1.61272	1.40868	1.37556	1.3548	1.44095	1.49663	1.48798	1.3662	1.42503	1.74775	1.48901	1.39601	1.31169	1.33392	1.38233	1.37114	1.30516	1.51232	1.55907	1.63723	1.30454	1.57183	1.37274	1.49889	1.46956	1.56095	1.56461	1.50427	1.55798	1.42327	1.43911	1.72893	1.40185	1.58894	1.4636	1.40992	1.48098	1.37701	1.32388	1.62854	1.33696
0610030E20Rik	0.0956966	0.142094	0.108675	0.182688	0.142438	0.100025	0.0892895	0.0890569	0.122007	0.156517	0.127546	0.175019	0.0945201	0.0857502	0.0901613	0.104318	0.143862	0.140441	0.119327	0.0866648	0.0722151	0.121156	0.107296	0.0978258	0.0892311	0.188558	0.180788	0.185431	0.159237	0.188127	0.133661	0.104628	0.0815467	0.0831104	0.112607	0.0669174	0.106836	0.0896248	0.0385082	0.173287	0.097204	0.0540115	0.0799785	0.033007	0.133835	0.258231	0.210922	0.138629	0.13315
0610033M10Rik	0	0	0	0	0.00686284	0	0.00315067	0	0	0	0	0	0	0	0	0	0	0	0	0	0	0	0	0	0	0	0	0	0	0	0	0	0	0.00447192	0	0	0	0.00509667	0	0	0.00468343	0	0	0	0	0	0	0	0
0610038B21Rik	0.0183211	0	0	0.0231049	0.0137257	0.0128361	0.00945201	0.00825175	0.00912036	0.0298128	0.0123015	0	0	0.00714585	0.00525112	0.0309264	0	0	0.0202379	0.021935	0	0.0288811	0.0141459	0	0	0.007617	0.0163093	0	0.00936685	0	0.0184839	0.00729629	0	0.00447192	0.00704895	0.00577623	0.00316506	0.0101933	0.0770164	0	0.00468343	0.0180038	0.0088865	0.0110023	0.0115525	0.0182833	0.0176224	0	0.0264056
0610039K10Rik	0.0183211	0.00936685	0	0	0.0589173	0.00508617	0.00630134	0.00825175	0.00912036	0.0074532	0.0123015	0.0203867	0.0157533	0	0.00832282	0.0285414	0.00918076	0.0106638	0.0151784	0.00877401	0.0150684	0.00962704	0.0243777	0.00924196	0.017548	0	0	0.00770164	0	0	0.00462098	0.0188606	0	0.00894383	0.0187972	0.00577623	0.0158253	0.0254834	0	0	0	0.00900191	0	0.0110023	0.0115525	0	0.0234965	0	0.0132028
0610040B10Rik	0.0463215	0.0616804	0.0825175	0.12904	0.100094	0.0743526	0.0730008	0.0495105	0.0866434	0.101251	0.109547	0.134246	0.0630134	0.0726727	0.0459729	0.0951644	0.0623601	0.0639828	0.0708326	0.0804571	0.0753421	0.0481352	0.0668153	0.0831777	0.0665506	0.0806257	0.114165	0.0539114	0.103035	0.0992616	0.0673968	0.0991198	0.227718	0.049951	0.0742137	0.0404336	0.0619875	0.0824128	0.115525	0	0.0562011	0.0720153	0.0622055	0.0678836	0.0231049	0.132652	0.141977	0.0462098	0.0528112
0610040F04Rik	0	0	0	0	0.0480399	0.00508617	0.00630134	0.00412588	0.00456018	0	0.00343142	0	0.0157533	0.0142917	0	0.00407734	0	0	0.0101189	0	0.0226026	0.0481352	0.033007	0.0277259	0	0	0	0.00770164	0	0	0.0138629	0.00729629	0	0.0134158	0.0046993	0	0	0.01529	0.0385082	0	0.00468343	0.0180038	0.0266595	0.0110023	0.0115525	0	0.0117483	0	0
0610040J01Rik	0.0201073	0.00936685	0	0.0231049	0.00686284	0.0128361	0.00630134	0.0123776	0.0228009	0.0074532	0	0	0	0.0214375	0.00525112	0.117243	0.00459038	0.0275655	0.0151784	0.0332753	0.00753421	0.0152585	0.00943057	0	0	0.007617	0.0163093	0.0308065	0	0.053319	0.00462098	0.00729629	0	0.00894383	0.0140979	0.0288811	0.00316506	0.0101933	0	0.173287	0	0	0.017773	0.0220047	0.0115525	0.0141459	0.0117483	0.0462098	0.0066014
0610043K17Rik	0.00610702	0.00936685	0.0165035	0.17525	0.0383287	0.0160451	0.00945201	0.0206294	0.0136805	0.0149064	0.0171571	0.06116	0.0315067	0.0214375	0.0157533	0.0448507	0.0302275	0.0213276	0.0282569	0.0201143	0.0226026	0	0.0188611	0.0184839	0.017548	0.015234	0.0163093	0.0385082	0.00936685	0.017773	0.0138629	0.0218889	0.0407734	0.00447192	0.0117483	0.00577623	0	0.0101933	0	0	0.0187337	0	0.0444325	0.0110023	0.0346574	0.0282917	0.0234965	0.0231049	0.0198042
1010001B22Rik	0.00610702	0.00936685	0.0165035	0	0.0343142	0.00320901	0.00630134	0.00412588	0.0228009	0	0.0205885	0.0407734	0	0.0285834	0.0315067	0.00815467	0.0183615	0.0319914	0.00505947	0.00877401	0.0150684	0	0.0141459	0.0331321	0.00877401	0.0196897	0	0.0154033	0.0281006	0.053319	0.00462098	0.00729629	0	0.00894383	0.0187972	0.0115525	0.00633011	0.00509667	0.0770164	0	0	0.00900191	0.017773	0.0220047	0	0.0212188	0.0176224	0	0.033007
1010001N08Rik	0.0244281	0	0	0	0.00686284	0	0.00630134	0	0.00456018	0	0.00686284	0	0.0157533	0	0	0.00946728	0	0.159155	0.018138	0.0101863	0.00753421	0	0.00943057	0	0	0.281269	0.438847	0.00770164	0	0.017773	0.00924196	0	0	0.00447192	0.00607376	0	0.00501649	0.0101933	0	0.173287	0.00468343	0	0	0	0	0	0.00587413	0	0.0066014
1110002J07Rik	0.0554821	0.0843017	0.066014	0.0597253	0.0686284	0.0596394	0.0653918	0.0395464	0.0254684	0.037266	0.081513	0	0.0315067	0.0571668	0.0713362	0.0431585	0.0459038	0.0702207	0.086011	0.021935	0.0841565	0.277564	0.0707293	0.133933	0.026322	0.0622303	0.00815467	0.0231049	0.0281006	0.124411	0.107068	0.0626383	0.0407734	0.0588948	0.0511164	0.0346574	0.0783506	0.16137	0.115525	0	0.0691034	0.0540115	0.0762903	0.0220047	0.0346574	0.00707293	0.0234965	0.115525	0.04347
1110002L01Rik	0.248432	0.265455	0.342528	0.377531	0.24538	0.293174	0.305862	0.343783	0.181289	0.167636	0.22136	0.195406	0.297847	0.281117	0.298833	0.340577	0.276292	0.20181	0.372788	0.319929	0.306354	0.34349	0.274296	0.23262	0.299148	0.162546	0.125091	0.231779	0.345869	0.333331	0.279969	0.260329	0.550839	0.333289	0.309847	0.245546	0.311499	0.28802	0.0995422	0	0.233467	0.297916	0.276164	0.309108	0.14735	0.264645	0.214463	0.184839	0.310395
1110002O04Rik	0	0	0	0	0	0	0	0	0	0	0	0	0	0	0	0	0	0	0	0	0	0	0	0	0	0	0	0	0	0	0	0	0	0	0	0.00577623	0	0.0182714	0	0	0	0	0	0	0	0	0	0	0
1110004F10Rik	2.45178	2.53963	2.45718	2.47115	2.32389	2.51957	2.47031	2.40055	2.4303	2.50535	2.49099	2.56158	2.38888	2.46176	2.47786	2.3776	2.43459	2.39371	2.42406	2.48869	2.36939	2.49377	2.39873	2.5052	2.25951	2.39223	2.4725	2.66045	2.66165	2.61838	2.40696	2.3781	2.42071	2.43677	2.43117	2.52378	2.42875	2.62967	1.94985	2.33622	2.43697	2.48088	2.45435	2.45783	2.40139	2.46836	2.54389	2.33336	2.4543
1110006O24Rik	0.0201073	0.0562011	0	0.0231049	0.0343142	0.0192541	0.0346574	0.0123776	0.0209082	0.0223596	0.0137257	0.0407734	0	0.0428751	0.0262556	0.024464	0.0183615	0.0213276	0.0282569	0.017548	0.0150684	0.0192541	0.0141459	0.0277259	0.026322	0	0.0210795	0.0321152	0.0281006	0.035546	0.0323469	0.0145926	0.0815467	0.0313034	0.0164476	0.00577623	0.0303369	0.0314461	0.0385082	0	0.0140503	0.0270057	0.071092	0.0550117	0	0.0424376	0.0352448	0.0231049	0.0566728
1110008P14Rik	1.27723	1.15817	1.18262	1.06721	1.16022	1.40254	1.25064	1.19095	1.05811	1.14591	1.22167	1.24416	1.05775	1.14976	1.132	1.10934	1.14969	1.41784	1.1089	1.09522	0.955837	1.2802	1.28644	1.2571	1.31364	1.32514	1.48999	2.29657	1.07511	1.32155	1.19708	1.16181	1.2292	1.17297	1.21432	1.19031	1.21281	1.36931	1.22693	1.19687	1.26399	1.09403	1.16332	1.11807	1.2866	1.54689	1.24853	1.30233	1.1988
1110012L19Rik	0.424278	0.434946	0.506027	0.419814	0.420977	0.338346	0.415481	0.449033	0.454379	0.346086	0.497057	0.52006	0.408403	0.429439	0.405331	0.271569	0.384211	0.545683	0.443538	0.303456	0.468548	0.30171	0.369487	0.424285	0.343692	0.496424	0.348039	0.345869	0.300627	0.216296	0.363585	0.459809	0.573959	0.351856	0.447018	0.366413	0.428782	0.419676	0.314609	0.173287	0.44768	0.310654	0.400734	0.42537	0.523805	0.31775	0.243834	0.225386	0.523387
1110013H19Rik	0.00610702	0.00936685	0	0	0.0205885	0.0128361	0.0175964	0.00825175	0.0182407	0.0192662	0.00686284	0.0407734	0.04726	0.0214375	0.0105022	0.00407734	0.00459038	0	0	0.00438701	0.00753421	0	0.00471529	0.0184839	0.00877401	0.015234	0	0.00770164	0	0.017773	0	0.00729629	0	0.00894383	0.00939861	0.00577623	0.00316506	0	0	0	0.00468343	0.0180038	0	0.0110023	0.0115525	0	0.0117483	0	0.0066014
1110017D15Rik	0	0	0	0	0.00686284	0	0	0	0	0	0.00343142	0	0	0	0	0.00407734	0.00459038	0	0.00505947	0	0	0.00962704	0.00943057	0	0	0.007617	0	0.0308065	0	0	0.00924196	0	0	0	0	0.00577623	0	0.00509667	0	0	0	0.00900191	0	0.0174383	0.0115525	0.00707293	0	0	0
1110018N20Rik	0.0048397	0.00936685	0	0	0	0.00320901	0	0	0.00456018	0	0	0	0.0157533	0	0	0	0	0	0	0	0	0	0	0	0	0	0.00815467	0	0	0	0	0	0	0.00447192	0.00234965	0	0	0	0	0	0	0	0	0	0.0183102	0	0	0	0
1110019B22Rik	0.00305351	0	0	0	0.0137257	0	0.00315067	0.00825175	0	0	0.00686284	0	0	0.00714585	0	0.00407734	0	0	0	0	0.00753421	0	0	0	0	0.007617	0.00815467	0	0	0	0	0	0	0	0	0.00577623	0.00316506	0.0203867	0	0	0	0	0	0	0.0115525	0	0	0	0
1110019D14Rik	0.144553	0.0897809	0.181539	0.0963457	0.165874	0.0917296	0.146537	0.145107	0.163824	0.037266	0.08093	0.0407734	0.200932	0.135771	0.120776	0.102626	0.131216	0.12354	0.155603	0.0998259	0.214799	0.0922749	0.167439	0.107068	0.168197	0.053319	0.0652374	0.133545	0.0952602	0.0814886	0.185624	0.192183	0.24464	0.125974	0.147851	0.113127	0.136635	0.0662567	0.253575	0	0.142094	0.140294	0.0977515	0.166905	0.124245	0.0677938	0.0528672	0.0924196	0.125427
1110020A21Rik	0.0341075	0.00936685	0.0495105	0.0231049	0.0411771	0.0371763	0.018904	0.0247553	0.0273611	0.0074532	0.0514713	0.0815467	0.0787667	0.0285834	0.0420089	0.0203867	0.0229519	0.0106638	0.0151784	0.013161	0.0226026	0.0481352	0.033007	0.0369678	0.026322	0.030468	0.0326187	0.0860267	0.0187337	0.106638	0.0231049	0.0437777	0.0815467	0.0313034	0.0305455	0.0288811	0.0461622	0.0263494	0.0770164	0	0.0234171	0.0720153	0.0266595	0.0614476	0.0577623	0	0.0797998	0.0231049	0.0132028
1110028F11Rik	0	0	0	0	0	0.00641803	0	0	0	0	0	0	0	0.0142917	0	0	0.00459038	0	0	0	0	0	0	0	0	0	0	0	0	0	0	0	0	0	0	0	0	0.00509667	0	0	0	0	0	0	0	0.0353647	0.083236	0	0
1110028F18Rik	0	0	0.0165035	0	0	0.00320901	0	0	0	0	0	0	0	0	0	0	0	0	0	0	0	0	0	0	0	0.007617	0.0163093	0	0	0	0	0	0	0	0.00234965	0	0	0	0	0	0.00936685	0	0	0	0	0	0.00587413	0	0
1110032A03Rik	0.204361	0.198296	0.191192	0.317805	0.276846	0.234263	0.208006	0.159898	0.299511	0.202503	0.181349	0.248104	0.257407	0.235276	0.250277	0.206252	0.206222	0.257743	0.245822	0.146929	0.132489	0.206903	0.192972	0.224948	0.124327	0.248921	0.263721	0.196467	0.541165	0.2059	0.203678	0.253582	0.24464	0.229588	0.216613	0.237373	0.194092	0.316093	0.154033	0.173287	0.240094	0.149296	0.245134	0.237485	0.191597	0.21339	0.244727	0.21187	0.202529
1110032F04Rik	0.00305351	0.00936685	0	0.0231049	0.0137257	0.00320901	0.0220547	0.0123776	0.00456018	0.098158	0.106116	0.175019	0	0.00714585	0	0.012232	0	0	0.0252973	0.00438701	0.0150684	0	0.00471529	0	0	0.022851	0.0992418	0	0.0187337	0	0.00924196	0.00729629	0	0.00447192	0	0.00577623	0.0158253	0.0182714	0	0	0	0.00900191	0.0088865	0.0110023	0	0.0141459	0.0352448	0.0231049	0.0594126
1110035H17Rik	0.0280005	0.00936685	0.0165035	0	0.0274514	0.0545533	0.0504107	0.0395464	0.0228009	0.0447192	0.0377456	0.06116	0.0722285	0.00714585	0.0210045	0.0186944	0.0439986	0.0746466	0.0151784	0.013161	0.0722151	0.0288811	0.0518682	0	0.0438701	0.022851	0.0210795	0.0539114	0	0.035546	0.0415888	0	0	0.0294474	0.0234965	0.0288811	0.0398321	0.0101933	0	0	0.0187337	0.0180038	0.035546	0.033007	0.0231049	0.0424376	0.0352448	0.0462098	0.033007
1110038B12Rik	2.32432	2.25879	2.2616	2.44153	2.34413	2.19805	2.22245	2.34766	2.27897	2.23666	2.28911	2.35053	2.30056	2.29724	2.39023	2.18857	2.29751	2.28441	2.2657	2.25651	2.30051	2.33072	2.27083	2.35196	2.33536	2.37311	2.39078	2.09825	2.27434	2.10816	2.28775	2.40143	2.33368	2.25855	2.34667	2.30754	2.28852	2.15391	2.30996	2.78823	2.3603	2.52843	2.32964	2.2826	2.49106	2.45085	2.32625	2.2589	2.46604
1110038F14Rik	1.29485	1.19411	1.33407	1.23699	1.27967	1.3261	1.29279	1.24672	1.26234	1.27937	1.26441	1.3077	1.31038	1.2784	1.24871	1.15334	1.33991	1.25113	1.2058	1.27857	1.28223	1.26024	1.23221	1.25981	1.30701	1.26738	1.10843	1.37801	1.25021	1.62752	1.3605	1.36343	1.28171	1.22494	1.26336	1.30749	1.38167	1.34974	1.19879	1.42595	1.26256	1.21018	1.33643	1.32383	1.18274	1.19853	1.05596	1.2445	1.254
1110046J04Rik	0.0213746	0.0468343	0.0165035	0.0231049	0.0589173	0.0435943	0.028356	0.037834	0.050162	0.0565322	0.0397529	0.0203867	0.0315067	0.00714585	0.0293273	0.00815467	0.036723	0.0426552	0.0252973	0.017548	0.0527395	0.0441396	0.0377223	0.0277259	0.0350961	0.038085	0.0944716	0.0430133	0.0749348	0.035546	0.0323469	0.0553421	0	0.0339193	0.0399441	0.0404336	0.0221554	0.0743347	0.0385082	0	0.0234171	0.0450096	0.0407443	0.0220047	0.0366204	0.0324291	0.0117483	0.0462098	0.0632742
1110051M20Rik	0.23518	0.170195	0.181539	0.138629	0.247713	0.246612	0.215615	0.264838	0.239454	0.248488	0.308901	0.297339	0.30199	0.202512	0.312098	0.227718	0.252906	0.2169	0.194839	0.16961	0.293268	0.329867	0.23541	0.195652	0.163065	0.205086	0.221562	0.239342	0.270934	0.282713	0.172547	0.222608	0.203867	0.271778	0.240509	0.199771	0.215767	0.194156	0.13805	0	0.252201	0.228107	0.248154	0.201781	0.287943	0.1863	0.174784	0.188765	0.221211
1110059E24Rik	0.586999	0.696745	0.59569	0.629533	0.594364	0.701983	0.666212	0.724961	0.605065	0.892305	0.752946	0.764368	0.630442	0.650716	0.667227	0.628704	0.601287	0.660808	0.698152	0.661393	0.537502	0.579841	0.674148	0.58697	0.658739	0.626362	0.636665	0.613413	0.65643	0.644213	0.64705	0.669125	0.849379	0.55394	0.637531	0.697942	0.641302	0.669705	0.606692	0.850299	0.610186	0.589581	0.594074	0.684877	0.747228	0.874041	0.861896	0.566296	0.818391
1110059G10Rik	0.430959	0.509009	0.485478	0.500907	0.487521	0.54118	0.497296	0.499008	0.590953	0.603867	0.524306	0.593145	0.469949	0.388316	0.442895	0.414209	0.503059	0.412282	0.492595	0.432357	0.405457	0.393985	0.417087	0.49384	0.510398	0.41708	0.505136	0.470404	0.488851	0.639453	0.499602	0.479361	0.479286	0.435807	0.435676	0.471272	0.404713	0.478246	0.676537	0.346574	0.503285	0.457597	0.439141	0.357683	0.459891	0.511008	0.552849	0.54104	0.38301
1110065P20Rik	0.783042	0.740351	0.802821	0.616432	0.635711	0.784317	0.692221	0.754687	0.889042	0.754903	0.638592	0.862008	0.614406	0.695354	0.830124	0.672148	0.740911	0.813118	0.721182	0.858974	0.633428	0.843013	0.798965	0.676914	0.807769	0.803396	0.749458	0.644094	0.63808	1.01042	0.679481	0.67859	0.771628	0.705423	0.766701	0.74338	0.703454	0.815519	0.673579	0.9678	0.665353	0.859964	0.664338	0.738435	0.790004	0.927727	0.760893	0.529676	0.891862
1190005I06Rik	0.694439	0.414453	1.00543	0.152145	0.89427	0.841242	0.931481	0.798827	0.667523	0.211222	0.430012	0.243107	0.77812	1.19115	0.769903	0.291503	0.664633	0.517753	0.944515	0.531575	0.848857	0.324741	0.676883	0.678529	0.864719	0.304692	0.334355	0.251512	0.625698	0.946708	0.80194	0.792912	0.638583	0.88581	0.84484	0.875167	0.879252	0.241193	0.72876	0.794513	0.799973	0.702562	0.805891	0.845494	0.710893	0.200446	0.343598	0.841566	1.04314
1190007I07Rik	0.64059	0.566969	0.853599	0.51616	0.667141	0.574009	0.685224	0.759398	0.627523	0.502615	0.623964	0.560833	0.656237	0.729707	0.633791	0.604545	0.661667	0.659136	0.729283	0.663879	0.669166	0.52642	0.643544	0.639991	0.615027	0.674204	0.647776	0.327395	0.517336	0.77624	0.68667	0.729104	0.900146	0.750692	0.749124	0.626221	0.729318	0.436665	0.513693	0.51986	0.606656	0.611321	0.69958	0.713068	0.656357	0.584557	0.569368	0.706286	0.58979
1190028D05Rik	0.0109467	0.00936685	0	0	0.0205885	0.0128361	0.0126027	0.0165035	0.0182407	0.0223596	0.0123015	0	0.04726	0.00714585	0.00525112	0.0163093	0.0137711	0.0106638	0.0151784	0.0157273	0.037671	0	0.00943057	0.00924196	0.0226805	0.007617	0.0129249	0	0.0187337	0.017773	0.0138629	0	0	0.0223596	0.00704895	0.0231049	0.0284855	0	0	0	0.0187337	0.00900191	0.0674038	0.0174383	0.0115525	0	0	0.0231049	0.0066014
1300002E11Rik	0.318094	0.347461	0.404497	0.51616	0.335247	0.33865	0.400557	0.328128	0.418858	0.345952	0.365228	0.288878	0.442586	0.383587	0.359358	0.165172	0.396422	0.392957	0.250493	0.282905	0.398759	0.280096	0.327404	0.332016	0.347333	0.340325	0.242641	0.393388	0.302923	0.474178	0.404034	0.364957	0.333115	0.365272	0.396434	0.321619	0.347742	0.478629	0.407608	0	0.309887	0.376727	0.374075	0.425567	0.354426	0.351381	0.369187	0.373605	0.348882
1300014J16Rik	0.0109467	0	0	0	0.0137257	0.0128361	0.00315067	0.00412588	0.00912036	0.0074532	0	0	0	0.00714585	0.00525112	0.012232	0	0	0.0151784	0.00438701	0	0.0192541	0	0.0184839	0.00877401	0.007617	0.00815467	0	0	0	0.00924196	0.00729629	0	0	0.0046993	0	0.00316506	0.0101933	0.0770164	0	0.00936685	0.00900191	0	0	0	0.0141459	0	0	0
1300017J02Rik	0.00916054	0.0187337	0	0	0.0343142	0.0160451	0.00945201	0.0165035	0.0319213	0.0074532	0.0171571	0.0203867	0	0.0142917	0.0293273	0.00815467	0.0183615	0	0.0101189	0.00877401	0.0226026	0	0.0282917	0.00924196	0	0.045702	0.00815467	0.0462098	0.0187337	0.017773	0.0277259	0.0145926	0	0.0249755	0.0281958	0.0346574	0.0158253	0.0203867	0.115525	0	0.0308402	0.0232696	0.017773	0.0770164	0.0115525	0	0.0176224	0.0231049	0.0132028
1500002C15Rik	0	0	0.0165035	0	0.00686284	0.0160451	0.018904	0	0.00912036	0	0.0171571	0.0203867	0.0157533	0.0142917	0.0105022	0.00407734	0.00459038	0.0213276	0.0151784	0.017548	0.00753421	0.00962704	0.00943057	0	0.017548	0.022851	0.0163093	0.00770164	0.00936685	0.017773	0.0138629	0.00729629	0.0407734	0.0223596	0.0164476	0.00577623	0.00949517	0.0203867	0	0.173287	0.0187337	0	0.0088865	0.0220047	0.0231049	0	0.0234965	0	0
1500002F19Rik	0.00305351	0	0.0165035	0	0.0205885	0.00320901	0.00814436	0	0	0	0	0	0	0	0.0105022	0.012232	0	0	0.0101189	0	0	0	0	0.00924196	0	0.022851	0	0	0	0	0.00462098	0	0	0.00447192	0	0	0	0	0	0	0.0167899	0.00900191	0	0.0110023	0	0	0.0151844	0	0
1500004A13Rik	0.043268	0.0749348	0.099021	0.0828302	0.0604435	0.0839797	0.0932124	0.0453846	0.0619499	0.156348	0.097246	0.195406	0.04726	0.0684927	0.0525112	0.0652374	0.0596749	0.0382293	0.0484948	0.0394831	0.037671	0.0288811	0.0518682	0.0662642	0.0577766	0.030468	0.0326187	0.234837	0.106051	0.053319	0.0646937	0.0334532	0.0815467	0.049951	0.0746129	0.0495887	0.067004	0.0636669	0.0770164	0.173287	0.0691034	0.0682792	0.0444325	0.126081	0.0808672	0.10436	0.0563033	0.0693147	0.0500714
1500009C09Rik	0	0.00936685	0.0165035	0	0.0205885	0	0	0	0	0	0	0	0	0	0.00525112	0	0.00918076	0.0106638	0	0	0.0226026	0.00962704	0.00471529	0	0	0	0	0.00770164	0	0	0	0.00729629	0	0	0.0046993	0.00577623	0.00949517	0.00509667	0	0	0.0121065	0.00900191	0.0088865	0.0220047	0	0.0141459	0	0.0231049	0
1500009L16Rik	0.875977	0.913789	0.763154	1.04437	0.962089	0.999016	0.788367	0.727424	0.648887	1.04382	1.03134	0.994721	0.731852	0.653389	0.749016	0.766775	0.777886	1.18956	0.833111	0.906199	0.710803	1.00724	1.03655	0.813175	0.842666	1.16014	2.28411	0.449463	0.44234	0.58924	0.60408	0.750577	0.730855	0.76135	0.803161	0.683388	0.657753	0.753184	1.00486	1.02359	0.835965	0.713669	0.730915	0.900629	0.883655	1.59581	1.15368	0.868435	0.968533
1500011B03Rik	1.11388	1.02122	1.10426	0.920722	1.12874	1.13097	1.11502	1.00053	1.05347	1.14172	1.07973	1.17135	1.17741	1.03222	1.07945	0.81852	1.08635	1.04806	1.10422	0.89179	0.879572	1.1821	1.20913	1.06094	0.9124	0.966493	0.942892	1.41502	0.810202	1.09461	1.0049	1.18673	1.08923	1.10165	1.04753	1.11708	1.00612	1.15782	1.18867	1.19687	1.05241	1.13189	1.04377	1.02887	0.925595	1.27575	1.25689	1.0979	1.08108
1500015A07Rik	0.647021	0.675163	0.621847	0.708061	0.661671	0.604789	0.565838	0.612135	0.619895	0.769873	0.770446	0.840552	0.632554	0.662685	0.637908	0.642295	0.607085	0.689193	0.632434	0.595171	0.573191	0.623873	0.641604	0.773714	0.715039	0.670457	0.701342	0.601798	0.65467	0.725298	0.679586	0.744687	0.608535	0.652929	0.689842	0.631602	0.641659	0.664983	0.760097	0.621227	0.62396	0.674865	0.654101	0.575879	0.64218	0.60358	1.07435	0.612506	0.72032
1500026H17Rik	0.00610702	0.0187337	0	0	0.00686284	0.00641803	0.00945201	0.0123776	0.00912036	0.0223596	0.0137257	0.0203867	0	0	0.0262556	0.0203867	0.00918076	0	0.00505947	0.017548	0.0150684	0	0.0141459	0.00924196	0.017548	0	0	0.0661183	0.00936685	0	0.0138629	0	0	0.0134158	0.0117483	0	0.00949517	0.0203867	0.0385082	0	0.00468343	0	0.017773	0.066014	0	0.0141459	0.00587413	0.0231049	0.0132028
1500035N22Rik	0	0	0	0	0	0	0	0	0.00456018	0	0.00343142	0	0	0	0	0	0	0	0	0	0	0	0	0	0	0	0	0	0	0.017773	0	0	0	0	0.00234965	0.00577623	0	0.00509667	0	0	0	0	0	0	0	0	0.00587413	0	0.0132028
1520401A03Rik	0	0.0187337	0	0.0231049	0.00686284	0.00962704	0.00315067	0	0.00456018	0.0149064	0	0	0.0157533	0	0.0105022	0.012232	0.0137711	0	0.0404757	0	0.00753421	0	0.00471529	0	0.00877401	0.007617	0	0.189936	0	0.0814886	0.00462098	0.00729629	0	0.00894383	0.00939861	0.0231049	0.0158253	0.00509667	0	0	0.00936685	0.00900191	0.017773	0.033007	0.0115525	0.00707293	0	0.0462098	0.0198042
1600002K03Rik	0.245897	0.397479	0.295822	0.267669	0.219095	0.216399	0.33898	0.384879	0.39064	0.508108	0.417927	0.402737	0.361142	0.324669	0.239869	0.318805	0.36273	0.285309	0.257181	0.270589	0.38241	0.39636	0.427951	0.407522	0.413884	0.300237	0.392197	0.365916	0.408269	0.159957	0.323997	0.324756	0.285414	0.331009	0.31397	0.346252	0.367436	0.262528	0.237593	0.346574	0.25494	0.29418	0.361341	0.236658	0.29842	0.386746	0.362314	0.360089	0.363702
1600010M07Rik	0	0.00936685	0	0	0	0	0	0	0	0	0.00343142	0	0	0	0	0	0	0	0	0	0.00753421	0	0.00471529	0	0	0	0	0	0	0	0	0	0	0	0	0	0	0.00509667	0	0	0.00468343	0	0	0	0	0	0	0	0
1600012H06Rik	0.256614	0.2241	0.233853	0.487392	0.250561	0.260182	0.255266	0.236267	0.391415	0.235981	0.289473	0.455435	0.311206	0.355681	0.248098	0.228717	0.218088	0.166195	0.207058	0.2494	0.295693	0.364207	0.275536	0.348069	0.241371	0.394815	0.227718	0.320147	0.198296	0.26494	0.204546	0.307135	0.333115	0.196428	0.281428	0.263856	0.211583	0.378419	0.414151	0.693147	0.224812	0.264115	0.242956	0.39069	0.205113	0.26357	0.31632	0.267669	0.259698
1600014C10Rik	0.0341075	0.0429467	0.066014	0.0231049	0.0686284	0.0288811	0.04726	0.0577623	0.0437091	0.0670788	0.0549027	0.0815467	0.04726	0.0214375	0.0525112	0.024464	0.0715409	0.0319914	0.0354163	0.026322	0.0150684	0.0537667	0.064057	0.00924196	0.017548	0.0546133	0.0652374	0.0308065	0.0616804	0.0563391	0.039671	0.0291851	0.227718	0.0402473	0.0328951	0.0288811	0.0379807	0.0590447	0.0385082	0.173287	0.0421508	0.0720153	0.0444325	0.0550117	0.0577623	0.0919481	0.0411189	0.0231049	0.0605344
1600014C23Rik	0	0	0	0.0231049	0	0.00320901	0	0	0	0	0.0102943	0.0203867	0.0157533	0.00714585	0	0.00407734	0	0	0.0202379	0	0.00753421	0	0	0	0.00877401	0	0	0	0.0187337	0	0	0	0.0407734	0.0134158	0.0046993	0	0.00316506	0.00509667	0	0	0	0.00900191	0	0	0	0	0.00587413	0	0
1600020E01Rik	0.150376	0.117882	0.233853	0.0462098	0.141271	0.101902	0.15914	0.103848	0.223456	0.108705	0.144703	0.101933	0.0722285	0.12984	0.153055	0.165172	0.195136	0.127966	0.125247	0.129789	0.14571	0.0704885	0.161922	0.180309	0.229615	0.100315	0.0863169	0.11044	0.220704	0.124411	0.155981	0.121009	0.12232	0.15754	0.130029	0.168492	0.139024	0.105781	0.176559	0.173287	0.175674	0.132822	0.124411	0.192451	0.21187	0.124377	0.106732	0.105935	0.146353
1600022D10Rik	0	0	0	0	0	0	0	0	0	0.0074532	0	0	0	0	0	0	0	0	0	0	0	0	0	0	0	0	0	0	0	0	0	0	0	0	0	0	0	0.0692381	0	0	0	0	0	0	0	0	0.00587413	0	0
1600025M17Rik	0	0	0	0	0	0	0	0	0	0.0074532	0	0	0	0	0	0	0	0	0	0	0	0.0152585	0	0	0	0	0	0	0	0	0	0	0	0	0	0	0	0	0	0	0.00468343	0	0	0	0	0	0	0	0
1600027J07Rik	0	0	0.0165035	0	0	0	0	0.00412588	0	0	0	0.0203867	0	0	0	0	0	0	0	0	0	0	0	0	0	0	0	0.0154033	0	0	0	0	0	0	0	0	0	0	0	0	0	0	0	0	0	0	0	0	0
1700001C19Rik	0.00305351	0	0	0	0.00686284	0.00641803	0	0.00825175	0.00912036	0	0	0	0.0157533	0.00714585	0	0.00815467	0.0137711	0.0106638	0.00505947	0.00438701	0	0	0	0	0	0	0.0129249	0	0.00936685	0.017773	0.00462098	0.0145926	0	0	0	0	0	0.0101933	0	0	0	0	0	0	0	0.00707293	0.00587413	0	0.0198042
1700001G11Rik	0.0353748	0.0671596	0.115525	0.0597253	0.089217	0.0307583	0.0504107	0.0460857	0.0490442	0.037266	0.0554858	0.06116	0.0787667	0.0684927	0.0555829	0.0163093	0.0558646	0.0426552	0.036276	0.0350961	0.037671	0.0192541	0.0546264	0.060858	0.0768155	0.022851	0.0733921	0.0385082	0.0374674	0.088865	0.0766388	0.0784707	0.0815467	0.0633667	0.0473923	0.0346574	0.0619875	0.0509667	0.0770164	0	0.0589408	0.0630134	0.111836	0.066014	0.0693147	0.0282917	0.044555	0.0693147	0.076477
1700001K19Rik	0	0	0	0	0	0	0	0	0	0	0	0.0203867	0	0	0	0	0.00459038	0	0	0	0	0	0	0	0	0	0	0	0	0	0	0	0	0	0	0	0	0	0	0	0	0	0	0	0	0.00707293	0.00587413	0	0
1700001K23Rik	0	0	0	0	0	0	0	0	0	0	0	0	0	0	0	0	0	0	0	0	0.00753421	0.00962704	0	0	0	0	0	0	0	0	0	0.00729629	0	0	0	0	0	0	0	0	0	0.00900191	0	0	0	0	0.00587413	0	0
1700001L05Rik	0.149911	0.198296	0.191192	0.0924196	0.165874	0.123033	0.147845	0.131017	0.102991	0.212489	0.18219	0.248104	0.298129	0.132805	0.182502	0.15871	0.156853	0.0808845	0.107109	0.127969	0.113013	0.0633937	0.12064	0.0646937	0.159423	0.17778	0.187557	0.0539114	0.0804141	0.071092	0.120931	0.125277	0.105398	0.19086	0.144926	0.15694	0.175154	0.0904908	0.115525	0	0.105775	0.109553	0.111836	0.138464	0.0808672	0.139725	0.201717	0.198355	0.131532
1700001L19Rik	0.0152676	0.0468343	0.033007	0.0462098	0.0343142	0.00962704	0.00945201	0.0206294	0.00456018	0.0149064	0.0137257	0	0	0.0142917	0.0157533	0.012232	0.0137711	0	0.00505947	0.00877401	0.0150684	0.0192541	0.00943057	0.0277259	0.017548	0.015234	0.00815467	0.00770164	0.0187337	0.035546	0.00462098	0.0334532	0.0407734	0	0.0046993	0.00577623	0.0189903	0.0254834	0	0	0.0140503	0.0180038	0.0088865	0	0.0115525	0	0.0269327	0.0231049	0.0066014
1700001O22Rik	0.00610702	0.0187337	0	0.0693147	0.0205885	0.0128361	0.0157533	0.0165035	0.0136805	0.0149064	0.0102943	0.0203867	0.0315067	0.00714585	0.0105022	0.00815467	0.0137711	0	0.0101189	0.017548	0	0	0.0357653	0.00924196	0	0	0.024464	0	0.0281006	0.017773	0.00462098	0.0145926	0	0.00894383	0.0140979	0	0.0126602	0.0254834	0	0.173287	0.0140503	0.00900191	0.017773	0.0110023	0.0231049	0.00707293	0.0293706	0.0231049	0.0198042
1700001P01Rik	0.00610702	0.0187337	0.0165035	0.0462098	0.0137257	0.0160451	0.0220547	0.0123776	0	0.0149064	0.0260272	0	0	0.00714585	0.00525112	0	0.0275423	0.0213276	0.00505947	0.013161	0.0150684	0.0192541	0.0141459	0	0.00877401	0.007617	0.0163093	0	0	0.017773	0.0184839	0.0334532	0	0.0223596	0.017822	0.0288811	0.0316506	0.00509667	0.0385082	0	0.0261568	0.00900191	0.017773	0	0.0346574	0.00707293	0.00587413	0	0.0066014
1700003E16Rik	0.00305351	0	0	0	0.0137257	0.00320901	0.00315067	0.00825175	0	0.0074532	0	0	0	0	0	0	0	0	0	0	0	0	0.00471529	0	0.00877401	0	0.00815467	0.0154033	0	0	0.00462098	0	0	0.00447192	0.00234965	0.00577623	0	0	0	0	0	0	0	0	0	0	0.00587413	0	0
1700003F12Rik	0.0140002	0.00936685	0	0.0231049	0	0.0160451	0.00315067	0.00825175	0.0117879	0.0310793	0.00343142	0.0407734	0.0157533	0.00714585	0.00525112	0.00815467	0	0	0.0101189	0.013161	0	0	0	0	0	0.007617	0.00815467	0.0462098	0	0	0	0	0	0.00447192	0.00234965	0.00577623	0	0.0203867	0	0	0.00468343	0	0	0	0.0115525	0.0141459	0.0621774	0	0.0198042
1700003G18Rik	0.00610702	0.0374674	0	0.0231049	0.00686284	0.00641803	0.00630134	0.0123776	0	0.0149064	0.00686284	0	0.0157533	0	0.00525112	0.0203867	0.00459038	0	0.0151784	0	0.0226026	0.00962704	0.0141459	0.00924196	0.00877401	0.007617	0.00815467	0	0.00936685	0	0.0277259	0.0115643	0	0.0223596	0.00939861	0.00577623	0.0189903	0.01529	0.0385082	0	0.00936685	0.0180038	0	0.0110023	0	0	0.0117483	0	0.0132028
1700003I16Rik	0	0	0	0	0	0	0	0	0	0	0	0	0	0.00714585	0.00525112	0	0	0	0	0	0	0	0	0	0	0.015234	0	0	0	0	0	0	0	0	0	0	0	0	0	0	0	0	0	0.0110023	0	0	0	0	0.0170644
1700003M07Rik	0	0.00936685	0.0165035	0	0.00686284	0.00829518	0	0	0.0136805	0.0074532	0.00343142	0.0203867	0.0157533	0	0.00525112	0.00407734	0.00459038	0.0106638	0	0	0.00753421	0	0.00471529	0.00924196	0	0.007617	0.024464	0.0430133	0	0.017773	0.0138629	0.00729629	0	0	0.00704895	0	0.00949517	0.00509667	0	0	0.00468343	0.00900191	0	0	0.0115525	0	0.00587413	0	0.0066014
1700006J14Rik	0.00610702	0.00936685	0.0165035	0.0231049	0	0.00962704	0.0157533	0.00412588	0.00456018	0.0298128	0.00343142	0.0407734	0	0.0214375	0.0262556	0.024464	0	0.0106638	0.0404757	0.017548	0.0420783	0.0481352	0.0235764	0.0184839	0.00877401	0.015234	0.0163093	0.00770164	0.0562011	0.017773	0.00924196	0.0145926	0	0.00894383	0.0046993	0.0288811	0.00949517	0.0599108	0.0385082	0	0.0234171	0.00900191	0.017773	0.0220047	0.0231049	0.0353647	0.044555	0	0
1700007J10Rik	0	0	0	0.0231049	0	0.00320901	0	0	0	0.0074532	0	0	0	0	0	0	0	0	0	0	0	0	0	0	0	0	0.00815467	0.00770164	0	0	0	0.00729629	0	0	0	0.00577623	0	0	0	0	0	0	0	0	0	0	0.00587413	0	0
1700007K13Rik	0.354518	0.226396	0.532917	0.105935	0.637498	0.199263	0.280662	0.393273	0.351284	0.15905	0.283653	0.251569	0.3136	0.409753	0.428552	0.153633	0.353797	0.467604	0.270914	0.277343	0.38837	0.276825	0.351697	0.236455	0.255278	0.366077	0.423443	0.419144	0.370802	0.226693	0.297238	0.353822	0.427788	0.334305	0.371741	0.40414	0.407289	0.149762	0.192541	0.794513	0.342969	0.335453	0.354124	0.414368	0.378418	0.086391	0.164034	0.359564	0.281013
1700007L15Rik	0.0987501	0.237355	0.0825175	0	0.159012	0.124365	0.123947	0.132729	0.125792	0.0670788	0.0932315	0.0730855	0	0.0714585	0.129098	0.118936	0.127405	0.117302	0.122287	0.105288	0.096098	0.165296	0.097064	0.11631	0.0526441	0.107932	0.15294	0.0892232	0.136615	0.053319	0.147524	0.176351	0.24464	0.114414	0.104759	0.130456	0.121829	0.123186	0.237593	0.173287	0.0636242	0.0900191	0.115525	0.188909	0.0577623	0.0677938	0.145413	0.198355	0.111727
1700008J07Rik	0.105376	0.138207	0.148532	0.12904	0.11382	0.158878	0.139644	0.102136	0.13457	0.108705	0.17073	0.341577	0.0630134	0.13402	0.138314	0.0944716	0.110949	0.219514	0.139565	0.1086	0.156372	0.0770164	0.105339	0.157113	0.0614181	0.111094	0.140015	0.0937283	0.132728	0.124411	0.132876	0.114952	0	0.147917	0.135704	0.166095	0.140876	0.0743347	0.154033	0	0.131932	0.113289	0.131119	0.138464	0.127077	0.188034	0.183096	0.12904	0.194688
1700008O03Rik	0.0659099	0.0843017	0.125178	0.0462098	0.134409	0.0738073	0.0934544	0.0973086	0.112887	0.0894383	0.0377456	0.0407734	0.135242	0.122694	0.133062	0.0927793	0.101768	0.0853104	0.0333164	0.0701921	0.0646809	0.0385082	0.0762458	0.103232	0.0438701	0.07617	0.0373889	0.0154033	0.103035	0.035546	0.0893691	0.0802591	0.146171	0.0972861	0.0924349	0.0635385	0.090473	0.0101933	0.0385082	0	0.0827176	0.064543	0.088865	0.0550117	0.0991774	0.0565834	0.0352448	0.138629	0.04347
1700010B13Rik	0	0	0	0	0	0	0.00315067	0	0	0	0	0	0	0	0	0	0	0	0	0	0	0	0.00471529	0	0	0	0	0	0	0	0.00462098	0	0	0	0.00234965	0	0	0	0	0	0	0	0	0	0	0	0	0	0
1700010I14Rik	0.00610702	0.024213	0.0165035	0	0.0274514	0.00962704	0.028356	0.018917	0.0300286	0.0223596	0.0102943	0.0526988	0.0157533	0.00714585	0.0210045	0.00815467	0.0256371	0.0106638	0.0231975	0.017548	0.0150684	0.00962704	0.0141459	0	0	0.007617	0.0407734	0	0	0.017773	0.0442919	0.0145926	0	0.0178877	0.0201717	0.0231049	0.00949517	0.0182714	0.0385082	0	0	0.0180038	0.0266595	0.0110023	0.0115525	0.00707293	0.0117483	0	0.0066014
1700010K24Rik	0	0	0.0165035	0	0.0137257	0	0.00315067	0	0	0.0149064	0	0	0.0157533	0	0	0.00407734	0.00918076	0	0.0101189	0.013161	0	0.00962704	0.00471529	0	0	0.007617	0	0	0	0.017773	0	0	0	0.00894383	0.00939861	0.0173287	0.00949517	0	0	0	0	0	0.0088865	0	0	0.0141459	0.00587413	0	0
1700011B04Rik	0	0	0	0	0	0	0.00630134	0	0	0	0.00343142	0	0.0157533	0	0.00525112	0	0	0	0	0.0245013	0	0	0	0	0	0	0	0	0	0	0	0.00729629	0	0	0	0	0	0.01529	0	0	0	0	0	0	0	0	0	0	0
1700011D18Rik	0.00305351	0	0	0	0.00686284	0	0	0	0	0	0.00343142	0	0	0.00714585	0	0.00815467	0	0	0	0	0.00753421	0	0.00471529	0	0	0	0	0	0.0148461	0	0	0.00729629	0	0	0.00234965	0	0.00316506	0	0	0	0	0	0	0	0.0115525	0.00707293	0.00587413	0	0.0066014
1700012B07Rik	0.00305351	0	0	0	0	0	0	0	0	0	0	0	0.0157533	0	0	0	0	0	0	0.00877401	0	0	0	0	0	0	0	0	0	0	0	0.00729629	0	0	0	0	0.00633011	0	0	0	0	0	0	0	0	0	0	0	0
1700012B09Rik	0	0	0	0	0.0137257	0.00320901	0	0	0.00456018	0.0074532	0.00343142	0	0	0	0	0	0.00459038	0.0106638	0	0	0	0	0	0.00924196	0	0	0	0.00770164	0	0	0.00462098	0.00729629	0	0	0.00234965	0.00577623	0	0.0365427	0	0	0.00468343	0	0	0	0	0	0	0.0231049	0
1700012C14Rik	0.00916054	0	0.0165035	0	0.0274514	0.0256721	0.00945201	0.033007	0.00456018	0.0074532	0.0205885	0	0.04726	0.0285834	0.0105022	0.00407734	0.00918076	0.0213276	0.0151784	0.00438701	0.0150684	0.0192541	0.0235764	0.0238901	0.00877401	0.007617	0.00815467	0.00770164	0.0281006	0	0.00462098	0	0	0.0268315	0.0211469	0.00577623	0.0221554	0.00509667	0	0.173287	0.00468343	0.00900191	0	0.0110023	0.0346574	0.0636564	0.046993	0	0.0066014
1700012D14Rik	0.0967343	0.160828	0.184343	0.0693147	0.0932315	0.142833	0.127098	0.110387	0.0866434	0.0757984	0.100094	0.06116	0.11295	0.0899302	0.100663	0.0723926	0.0899024	0.12354	0.0919302	0.116628	0.0753421	0.0673893	0.0809611	0.0755061	0.103138	0.118711	0.0733921	0.12904	0.147574	0.142184	0.119013	0.0887953	0.12232	0.115853	0.100459	0.0991774	0.120515	0.0802975	0.0385082	0	0.1261	0.0772811	0.138496	0.132028	0.11073	0.0536479	0.0891101	0.138629	0.129288
1700012D16Rik	0.00305351	0	0	0	0	0	0	0	0	0	0	0	0	0	0	0	0	0	0	0	0	0	0	0	0	0	0	0	0	0	0	0	0	0	0	0	0	0	0	0	0.00936685	0	0	0.0110023	0	0	0	0	0
1700013F07Rik	0	0	0	0.0231049	0	0.00641803	0.00315067	0	0	0	0	0	0	0	0.0240762	0	0	0.0106638	0.00505947	0	0	0	0	0	0	0	0.00815467	0	0	0.017773	0	0.00729629	0	0	0.0046993	0	0.00633011	0	0	0	0.00468343	0.00900191	0	0.0110023	0	0	0	0	0
1700013G24Rik	0.00610702	0	0	0	0	0	0	0.00412588	0	0	0	0	0	0	0	0	0	0	0	0	0	0	0	0	0	0	0	0	0	0	0	0	0	0	0	0	0	0	0	0	0	0	0	0	0	0	0	0	0
1700013H16Rik	0	0	0	0	0	0	0	0	0	0	0	0	0	0	0	0	0	0	0	0	0	0	0	0	0	0	0	0.00770164	0	0	0	0	0	0	0	0	0	0	0	0	0	0	0	0	0	0	0	0	0.0066014
1700014D04Rik	0.00305351	0	0.0165035	0	0	0.00320901	0	0	0.00456018	0.0074532	0	0	0	0.00714585	0	0	0.00459038	0	0.00505947	0	0	0	0.00471529	0.0184839	0.0350961	0	0	0	0.00936685	0	0.00462098	0	0	0	0	0.00577623	0.00633011	0.00509667	0	0	0	0	0	0.0110023	0.0115525	0	0.0176224	0	0
1700015F17Rik	0	0.00936685	0	0	0	0	0	0	0	0	0	0	0	0	0	0	0	0	0	0	0	0	0.00471529	0	0	0	0.00815467	0	0	0	0	0	0	0	0	0	0	0	0	0	0	0	0	0	0	0	0	0	0
1700016D06Rik	0.0213746	0.0843017	0	0	0.00686284	0.00962704	0.0346574	0.0271687	0.0300286	0.0223596	0.00686284	0	0.0157533	0.0184717	0.0345784	0.00407734	0.0394082	0.0213276	0.00505947	0.017548	0.00753421	0.0192541	0.0188611	0.0184839	0.0314545	0	0.00815467	0	0.024213	0	0.00462098	0.0364814	0	0.0294474	0.0450426	0.0288811	0.0303369	0.00509667	0	0.173287	0.0140503	0	0.035546	0.0110023	0.0298627	0.00707293	0.0117483	0.0231049	0
1700016G22Rik	0	0.00936685	0	0	0	0.00320901	0	0	0	0	0	0	0	0	0	0	0	0	0	0	0	0.00962704	0	0	0	0	0	0	0	0	0	0	0	0	0	0	0	0	0.0385082	0	0	0	0	0	0	0	0	0	0
1700016H13Rik	0	0.00936685	0	0	0.0137257	0	0.00945201	0.00412588	0	0	0	0	0	0.00714585	0.0105022	0.00407734	0.00459038	0.0106638	0.0101189	0	0.00753421	0.0152585	0.00471529	0	0	0	0	0	0.00936685	0	0	0	0	0.00447192	0.00704895	0.00577623	0.0126602	0.00509667	0.0385082	0	0	0	0.0266595	0	0	0	0.00587413	0	0
1700016J18Rik	0	0	0	0	0	0	0	0	0	0	0	0	0	0	0	0	0	0	0.0101189	0	0	0	0	0	0	0	0	0	0	0	0.00924196	0	0	0	0	0	0	0	0	0	0	0	0	0	0	0	0	0	0
1700016K19Rik	0.0335886	0.065568	0.0495105	0.0231049	0.0520544	0.0454715	0.0365004	0.0477981	0.06651	0.0341726	0.0603414	0.0526988	0.0879818	0.0285834	0.0735156	0.0716998	0.0439986	0.0213276	0.0404757	0.0394831	0.0527395	0.0633937	0.0734876	0.0369678	0.00877401	0.0501577	0.0815467	0.324477	0.0187337	0.035546	0.0415888	0.0699346	0.163093	0.0223596	0.0379937	0.0115525	0.0429972	0.0203867	0.0385082	0.346574	0.0448905	0.0270057	0.0444325	0.0944546	0.0876249	0.0212188	0.0386809	0.0693147	0.0368686
1700016P03Rik	0	0	0	0	0	0	0	0	0	0.0074532	0	0.0203867	0	0	0	0	0	0	0	0	0	0.00962704	0	0	0	0	0.00815467	0	0	0	0	0	0	0	0	0	0	0.00509667	0	0	0	0	0	0	0	0	0	0	0
1700017B05Rik	0.25195	0.328727	0.316371	0.188765	0.403764	0.30946	0.270726	0.269901	0.265616	0.368312	0.291418	0.419659	0.204793	0.300803	0.289309	0.229957	0.304878	0.262169	0.233604	0.289628	0.269385	0.409983	0.296354	0.362883	0.337226	0.335746	0.615254	0.200068	0.507585	0.251842	0.303505	0.240229	0.492412	0.224699	0.266935	0.245546	0.250639	0.184738	0.192541	0	0.233819	0.342087	0.264417	0.239355	0.3226	0.228738	0.324085	0.152145	0.377412
1700017J07Rik	0.00916054	0	0	0	0.00686284	0.00641803	0.0157533	0.00825175	0	0	0.00686284	0	0	0.0184717	0.00525112	0	0	0.0106638	0.00505947	0	0.0150684	0	0.00471529	0.00924196	0	0	0	0	0	0.017773	0.00924196	0	0	0.00447192	0.0046993	0.0115525	0.00633011	0.00509667	0	0	0.00468343	0	0	0	0	0	0.00587413	0	0
1700018A04Rik	0.00305351	0	0	0	0.00686284	0	0	0	0	0	0	0	0	0	0	0	0	0	0	0	0	0	0	0	0	0	0	0.0539114	0	0	0	0	0	0	0	0	0	0	0	0	0	0	0	0	0.0115525	0	0	0	0
1700018B08Rik	0.00610702	0	0	0	0.00686284	0.00320901	0.00945201	0	0	0.0074532	0.00686284	0	0	0	0	0	0	0	0	0	0.00753421	0	0.00471529	0.00924196	0	0.007617	0	0.0616131	0.00936685	0	0.00462098	0	0	0.00447192	0	0	0.00633011	0	0	0	0.00468343	0	0	0.0220047	0	0	0	0	0
1700018B24Rik	0	0	0	0	0	0	0	0	0	0	0	0	0	0	0	0	0	0.0106638	0	0.00438701	0.00753421	0	0	0.00924196	0	0	0	0	0	0	0.00924196	0	0	0.00447192	0.0046993	0	0	0	0	0	0	0.00900191	0	0	0	0	0	0	0
1700018F24Rik	0	0	0	0	0	0	0	0	0	0	0.00343142	0	0	0	0	0	0	0	0	0	0	0	0	0	0	0	0	0	0	0	0	0	0	0	0	0	0	0	0	0	0.00936685	0	0	0	0	0	0	0	0
1700018L02Rik	0.00305351	0.0148461	0.033007	0.0231049	0.00686284	0.00320901	0.00315067	0	0	0	0.00343142	0	0	0	0.0105022	0.0163093	0.0137711	0.0106638	0	0.0157273	0	0	0.00471529	0.00924196	0.017548	0	0.00815467	0	0	0	0.016566	0.0145926	0	0.00447192	0.00704895	0	0.00633011	0	0	0	0.0140503	0.0180038	0	0	0.0231049	0.00707293	0.0117483	0	0.0066014
1700019A02Rik	0	0	0	0	0	0.00962704	0	0.00412588	0	0	0	0	0	0	0	0	0.00918076	0	0	0	0	0.00962704	0	0	0	0	0.0163093	0	0	0.017773	0.00732408	0.00729629	0	0	0	0.00577623	0	0	0	0	0	0	0	0	0	0	0	0	0.0132028
1700019C18Rik	0	0	0	0	0	0.00320901	0	0	0	0	0	0	0	0	0	0	0	0	0	0	0.00753421	0	0	0	0	0	0	0	0	0	0	0	0	0	0	0.00577623	0	0	0	0	0	0	0	0	0	0	0	0	0
1700019D03Rik	0.776135	1.02258	0.953782	0.262006	0.838201	0.611901	0.994046	0.925265	1.17705	0.305593	0.405306	0.190409	1.00992	1.00736	1.08862	0.295653	1.03717	0.856835	0.675754	0.503195	0.98187	0.643407	0.922675	0.997866	0.927816	0.350531	0.295726	0.200255	0.398183	0.797233	0.822711	0.944133	1.17011	0.949257	0.964151	1.04309	0.937342	0.23234	1.19584	0.9678	0.900529	0.917818	0.958654	0.942411	1.01824	0.618188	0.590331	1.23314	0.330934
1700019E08Rik	0	0	0	0	0.00686284	0	0.00315067	0	0	0	0	0	0	0	0	0	0	0	0	0	0	0	0	0	0	0	0	0	0	0	0.00462098	0	0	0	0	0	0	0	0	0	0	0	0	0	0	0	0	0.0231049	0
1700019G24Rik	0	0	0	0	0	0.00320901	0	0	0	0	0	0	0	0	0	0	0	0	0	0	0	0	0.00943057	0	0	0	0	0	0	0	0	0	0	0	0	0	0	0	0	0	0.00468343	0	0	0	0	0	0	0	0
1700019L13Rik	0.00305351	0.0187337	0	0	0.00686284	0.0275493	0.0157533	0.00412588	0.00456018	0	0.0137257	0.0407734	0	0	0.0210045	0.00815467	0.0137711	0.0319914	0.0101189	0.017548	0.037671	0.0577623	0.0188611	0.0277259	0.017548	0.022851	0.0163093	0.0584166	0.0187337	0.0459426	0.00462098	0	0	0.00894383	0.00704895	0.0231049	0.0158253	0.0467361	0.0770164	0	0.032784	0	0.017773	0	0	0.0282917	0.0293706	0.0231049	0.033007
1700019N19Rik	0	0	0	0	0	0	0	0	0	0	0	0.0203867	0	0	0	0	0	0	0	0.00438701	0	0	0	0	0	0	0	0.00770164	0	0	0	0	0	0.00447192	0	0	0	0	0	0	0	0	0	0	0	0	0	0	0.0132028
1700020D05Rik	0.00305351	0.0187337	0.0165035	0.0231049	0.00686284	0.00320901	0.00945201	0.0165035	0	0	0.0102943	0	0	0.0142917	0	0	0.00918076	0.0169017	0.00505947	0	0.0226026	0.0192541	0.00943057	0.0277259	0	0.007617	0	0.0154033	0.00936685	0	0	0	0.0407734	0.00447192	0.0046993	0.0231049	0.0158253	0	0	0	0.00468343	0	0	0	0	0	0.0117483	0	0.0132028
1700020G17Rik	0	0	0	0	0.00686284	0	0	0	0	0	0	0	0.0157533	0	0	0	0	0	0	0	0	0	0	0.00924196	0	0	0	0	0	0	0	0	0	0	0	0	0.00316506	0.00509667	0	0	0	0	0	0	0	0	0	0	0
1700020L24Rik	0.00610702	0	0	0	0.00686284	0.0192541	0.00945201	0.00412588	0.0136805	0	0	0	0	0	0	0.00407734	0	0.0106638	0	0.00438701	0	0	0.00471529	0	0.00877401	0.007617	0	0	0.0187337	0	0.00924196	0.0218889	0	0.00447192	0.00704895	0	0.00949517	0	0.0385082	0	0.00468343	0.0142677	0	0	0.0231049	0.0141459	0.0293706	0	0.0066014
1700020N01Rik	0.00916054	0	0.0165035	0	0.0274514	0	0.0126027	0.0453846	0.00912036	0.0074532	0.00686284	0	0	0.0142917	0.0105022	0.012232	0.00918076	0	0.0101189	0.00877401	0.0150684	0.0152585	0.0141459	0	0.0226805	0.007617	0	0.00770164	0.00936685	0	0.00924196	0.0218889	0.0815467	0.00447192	0.0117483	0.0288811	0.00633011	0	0	0	0.00936685	0.00900191	0	0.0110023	0.0115525	0	0	0	0
1700020N15Rik	0	0	0	0	0.00686284	0	0	0.00412588	0	0	0.00343142	0	0	0	0	0.00407734	0	0.0106638	0	0.00877401	0	0	0.00471529	0	0	0	0.00815467	0	0.00936685	0.017773	0	0	0	0	0	0	0.00633011	0	0	0	0	0	0	0	0	0	0	0	0
1700021A07Rik	0.00305351	0	0	0.0231049	0	0	0	0	0.00456018	0.0074532	0	0	0	0	0.00525112	0	0	0	0	0	0	0	0.00943057	0	0	0	0	0	0	0.035546	0	0.0145926	0	0	0.00234965	0	0	0	0	0	0	0	0	0	0	0	0	0	0
1700021F05Rik	1.03952	0.955671	0.907155	0.866135	1.04349	1.10492	1.04961	1.07335	1.08374	0.980779	1.09916	1.06208	1.04181	0.942892	0.97689	0.985987	1.06383	1.04032	0.939129	0.926846	0.984969	0.911582	1.03883	0.941114	0.973673	1.10289	0.890768	0.655344	0.971309	1.2046	1.05297	1.07783	1.0857	1.05136	1.06083	0.916375	1.1214	0.72242	0.839134	0.794513	0.947862	0.970958	0.996378	1.0359	0.793043	0.737353	0.606599	0.996536	0.95277
1700021N21Rik	0.00305351	0.00936685	0	0	0.00686284	0	0	0.00412588	0	0	0	0	0	0.00714585	0.0105022	0	0.00459038	0.0106638	0	0.00438701	0	0	0.00471529	0	0	0.007617	0	0.00770164	0	0	0	0	0.0407734	0	0	0.0115525	0.00633011	0	0	0	0.00468343	0	0	0	0	0	0	0	0
1700022I11Rik	0	0	0	0	0.00686284	0.00320901	0.00315067	0	0.00912036	0.0074532	0.00686284	0	0	0.0142917	0	0.00815467	0.00459038	0	0.00505947	0.00438701	0.00753421	0	0.00471529	0	0	0	0.024464	0.00770164	0.00936685	0	0.00462098	0	0	0	0.00704895	0.00577623	0.00316506	0	0	0	0.00468343	0	0	0	0.0115525	0	0	0	0.0066014
1700022N22Rik	0.0140002	0.00936685	0.0165035	0.0462098	0.0343142	0.0256721	0.018904	0.0371329	0.0228009	0	0.02402	0	0	0.0285834	0.0157533	0.00815467	0.0137711	0.0213276	0.00505947	0.013161	0.00753421	0.00962704	0.0235764	0.0277259	0.00877401	0.0196897	0.0326187	0.0154033	0.00936685	0.035546	0.0231049	0.00729629	0	0.0223596	0.0234965	0.0288811	0.0208418	0.00509667	0	0	0.0261568	0.00900191	0.0266595	0	0.0115525	0.00707293	0.0352448	0	0.0264056
1700023F06Rik	0.0839467	0.192816	0.184343	0.0924196	0.154997	0.219309	0.134706	0.113812	0.155821	0.186902	0.180183	0.12232	0.119489	0.122694	0.142672	0.0961638	0.161878	0.117302	0.227296	0.0840986	0.165051	0.224694	0.1863	0.217971	0.154291	0.17132	0.115551	0.0738199	0.151461	0.216296	0.111689	0.142897	0.227718	0.156181	0.151399	0.1613	0.173064	0.18906	0.061034	0	0.127248	0.149296	0.120723	0.171471	0.122282	0.227536	0.126793	0.198355	0.159555
1700023H06Rik	0.00916054	0.00936685	0.0165035	0	0.00686284	0.00962704	0.00630134	0.0165035	0.0136805	0.0149064	0.0137257	0.0203867	0.04726	0.00714585	0.0157533	0.012232	0.0137711	0.0319914	0.0252973	0.0157273	0.0150684	0.0441396	0	0.00924196	0.00877401	0.007617	0.00815467	0.00770164	0	0.035546	0.0184839	0.00729629	0	0.0223596	0.0187972	0	0.00949517	0.00509667	0.0385082	0	0.0140503	0.0180038	0.0088865	0.033007	0.0115525	0.00707293	0	0	0
1700024B05Rik	0	0	0.0165035	0	0.0314659	0.0160451	0.00315067	0.0123776	0.0254684	0	0.00343142	0	0	0.0113259	0	0.00407734	0.00918076	0	0.0303568	0	0.0119414	0	0.0141459	0.0462098	0	0	0	0.00770164	0	0	0.00924196	0.00729629	0.0407734	0.00447192	0.00234965	0.0115525	0.00316506	0	0	0	0.00936685	0	0.0088865	0.0220047	0	0	0	0	0.0132028
1700024G13Rik	0.0236796	0.00936685	0	0.0597253	0.0274514	0.0211312	0.011295	0.0206294	0.00456018	0.391244	0.26214	0.175019	0	0.0327634	0.0157533	0	0.0183615	0	0.00505947	0.013161	0.00753421	0.00962704	0.0141459	0	0.017548	0	0.0163093	0	0.00936685	0	0.00462098	0.0145926	0.0407734	0.0205036	0.0107731	0	0.0189903	0	0	0	0.00936685	0.0180038	0.035546	0.0440093	0	0.0778022	0.377164	0	0
1700025G04Rik	0.255508	0.175674	0.198042	0.419814	0.145286	0.217185	0.225252	0.208397	0.198412	0.638039	0.470307	0.608169	0.14178	0.217728	0.147924	0.411131	0.185175	0.134204	0.201527	0.260661	0.0885638	0.329695	0.18274	0.228784	0.23988	0.354265	0.420818	0.124535	0.549492	0.325954	0.225295	0.204296	0.210795	0.151709	0.207929	0.200318	0.178319	0.740103	0.231049	0	0.203775	0.149296	0.226693	0.188909	0.112693	1.07708	0.855266	0.115525	0.287226
1700026D11Rik	0	0	0	0	0.00686284	0	0	0	0	0	0	0	0	0	0.00525112	0	0	0	0	0	0	0	0	0	0	0	0	0	0	0	0	0	0	0	0	0	0	0	0	0	0	0	0	0	0	0	0	0	0
1700026J14Rik	0	0	0	0	0	0	0	0.00412588	0	0.0074532	0	0	0	0	0	0	0	0	0	0	0	0	0	0	0	0.007617	0	0	0	0	0	0	0	0	0	0	0	0.00509667	0	0	0	0	0	0	0	0.00707293	0.00587413	0	0
1700026N04Rik	0.00610702	0	0	0	0	0	0.00630134	0	0	0	0	0	0	0	0.00525112	0	0	0	0	0	0	0	0.00471529	0	0	0	0	0.00770164	0	0	0.00462098	0	0	0	0.0046993	0.0115525	0.00316506	0.00509667	0	0	0	0	0.0088865	0	0	0	0.00587413	0	0
1700027A07Rik	0.00305351	0	0	0	0	0	0	0	0	0	0	0	0	0	0	0	0	0	0	0	0	0	0	0	0	0	0	0	0	0	0	0	0	0	0.00234965	0	0	0	0	0	0	0	0	0	0	0	0	0	0
1700027I24Rik	0	0	0	0	0	0	0	0	0	0	0	0	0	0	0.00525112	0	0	0	0	0	0	0	0	0	0	0	0	0	0	0	0	0	0	0	0	0	0	0	0	0	0	0	0	0	0	0	0	0	0
1700027J07Rik	0.00610702	0	0	0	0	0	0.00315067	0	0	0.0074532	0	0	0	0	0	0	0	0.0106638	0	0	0	0	0	0	0	0	0	0	0	0	0.00462098	0	0	0	0	0	0	0	0	0	0	0	0	0	0	0	0	0	0
1700028E10Rik	0.00610702	0.00936685	0	0.0462098	0.00686284	0.0128361	0.0157533	0.0106652	0.0364814	0.0223596	0.0102943	0.0203867	0.0407218	0.0142917	0.0157533	0.036696	0.0275423	0.0106638	0.0303568	0.017548	0.00753421	0	0.0121888	0.0184839	0.00877401	0.022851	0.0163093	0.00770164	0.0187337	0.071092	0.00924196	0.0145926	0	0.00447192	0.0187972	0.0346574	0.0348156	0.00509667	0	0	0.0140503	0	0.0088865	0.0110023	0.0346574	0.0141459	0.00587413	0.0231049	0.0198042
1700028I16Rik	0.0048397	0.0374674	0.0165035	0	0.0137257	0.0224631	0.0126027	0.00412588	0.00912036	0	0.00343142	0	0.0315067	0	0.00525112	0.00407734	0.00918076	0.0106638	0.0101189	0.00877401	0.0452053	0.0248855	0	0.0184839	0	0	0	0	0.0187337	0.053319	0.00924196	0	0	0.00447192	0.0140979	0	0.00633011	0.00509667	0	0	0.0187337	0.00900191	0.0088865	0	0.0231049	0.0141459	0.00587413	0.0693147	0
1700028J19Rik	0.00916054	0.0843017	0.0261574	0	0.0137257	0.0128361	0.0144457	0.0288811	0.028136	0.0074532	0.0137257	0.0407734	0.0315067	0.0142917	0.0210045	0.036696	0.0137711	0.0106638	0.00505947	0.013161	0.0452053	0.00962704	0.0141459	0.0277259	0.026322	0.022851	0.024464	0.227853	0.00936685	0.035546	0.0277259	0.0145926	0	0.0134158	0.0164476	0.0115525	0.0189903	0.0203867	0.0770164	0	0.032784	0.0360076	0	0.0440093	0	0.00707293	0.0176224	0.0597253	0.0132028
1700028K03Rik	0.00916054	0.0187337	0.0165035	0.0231049	0.0137257	0.0192541	0.00315067	0.00412588	0.0117879	0.0074532	0.0157329	0.0407734	0.0157533	0.00714585	0.00525112	0.012232	0.00459038	0	0.0202379	0.00438701	0.0150684	0.0248855	0.00471529	0	0	0	0.0163093	0	0.0187337	0	0.00924196	0.00729629	0.0407734	0.0178877	0.00939861	0.00577623	0.0158253	0.0101933	0.0770164	0	0.0281006	0.00900191	0.017773	0.0220047	0.0231049	0	0.0234965	0	0.0198042
1700028N14Rik	0.00305351	0	0	0	0.00686284	0.00320901	0	0	0	0	0	0	0	0	0	0	0	0	0	0	0	0	0	0	0	0	0	0	0	0	0	0	0	0	0	0.00577623	0.00633011	0	0	0	0	0	0	0	0	0	0	0	0
1700028P14Rik	0	0	0	0	0	0	0	0	0	0	0	0	0	0	0	0	0	0	0	0	0	0	0	0	0	0.007617	0	0	0	0	0	0	0	0	0.00234965	0	0	0	0	0	0	0	0	0	0	0.00707293	0.0117483	0	0
1700029H14Rik	0	0.00936685	0.0165035	0	0	0	0	0	0	0	0	0	0	0.00714585	0	0	0	0	0	0	0	0	0	0	0	0	0	0	0	0	0	0	0	0	0	0	0	0	0	0	0	0	0	0	0	0	0	0	0
1700029I15Rik	0	0.00936685	0	0	0	0.00320901	0.00630134	0.00412588	0	0	0	0	0	0	0.00525112	0.00407734	0	0	0	0	0.00753421	0.00962704	0	0	0	0.007617	0	0.0308065	0.0187337	0	0	0	0	0.00447192	0.00234965	0	0	0.00509667	0	0	0	0.00900191	0.0088865	0	0	0	0	0	0
1700029J07Rik	0.0109467	0.00936685	0	0	0.0137257	0.0192541	0.0220547	0.0147911	0.00456018	0.037266	0.02402	0.0407734	0	0.0142917	0.0188251	0.036696	0	0.0106638	0.0404757	0.0288883	0.0150684	0.0192541	0.0188611	0	0.00877401	0.015234	0.0163093	0.0353117	0.0187337	0.035546	0.0323469	0.00729629	0	0.0223596	0.0046993	0.0173287	0.00949517	0.0203867	0.0385082	0	0	0.0270057	0.035546	0	0.0462098	0.0536479	0.0352448	0.0231049	0.0198042
1700029M20Rik	0	0.00936685	0.0426609	0	0	0.00320901	0.00630134	0	0.00912036	0	0	0	0	0.00714585	0	0.0146171	0.00459038	0	0.0101189	0.00438701	0.00753421	0	0.0141459	0	0	0.007617	0	0	0.00936685	0.017773	0.00924196	0	0	0	0.00939861	0.0173287	0	0	0	0	0.00468343	0.00900191	0.0088865	0	0.0231049	0	0	0	0.0066014
1700029P11Rik	0.101	0.0936685	0.295822	0.369302	0.152149	0.116316	0.18173	0.141682	0.218121	0.14105	0.166457	0.234281	0.157533	0.0970761	0.131278	0.113166	0.12247	0.0977863	0.131166	0.101647	0.159499	0.0730208	0.192171	0.0885839	0.117044	0.206244	0.104012	0.159847	0.113994	0.0992616	0.0462098	0.114952	0.251569	0.209428	0.164303	0.185821	0.174378	0.0977028	0.115525	0.274653	0.142094	0.118554	0.152581	0.157772	0.105935	0.0960855	0.0949842	0.207944	0.102883
1700030C12Rik	0.00916054	0	0.0165035	0	0.00686284	0.00320901	0	0.00412588	0	0	0.00343142	0.0203867	0.0315067	0	0	0	0.00918076	0	0	0	0.0194756	0.00962704	0.00471529	0.00924196	0	0	0.0163093	0	0	0.035546	0	0.00729629	0	0.00447192	0.0117483	0.00577623	0	0.0203867	0	0.173287	0.00936685	0.00900191	0	0	0	0	0	0	0.0132028
1700030J22Rik	0.0676961	0.0374674	0.099021	0.0462098	0.120683	0.0628484	0.10635	0.0766793	0.094646	0.0714386	0.0686284	0.0407734	0.103735	0.0643126	0.0503317	0.0268491	0.0734461	0.10845	0.0404757	0.0526441	0.0602737	0.0192541	0.0612987	0.0924196	0.017548	0.053319	0.048928	0.143726	0.0468343	0.142184	0.0997437	0.0480458	0.0815467	0.0581349	0.0601157	0.0669174	0.0720205	0.0845281	0.0385082	0.173287	0.0636242	0.0502753	0.0940633	0.066014	0.0924196	0.0495105	0.0739257	0.0828302	0.0396084
1700030K09Rik	0.166162	0.179562	0.224199	0.0693147	0.19734	0.192845	0.243435	0.200145	0.237561	0.144144	0.22279	0.227718	0.18904	0.252533	0.212721	0.200869	0.266677	0.155531	0.172882	0.202218	0.288159	0.180554	0.247599	0.237165	0.13161	0.22032	0.144785	0.121338	0.179562	0.342072	0.220674	0.195211	0.203867	0.21246	0.278326	0.229199	0.228722	0.134246	0.192541	0	0.196352	0.301652	0.274813	0.199912	0.233012	0.136789	0.145413	0.267669	0.129288
1700030N03Rik	0	0	0	0	0	0	0	0	0.00456018	0.0074532	0	0	0	0	0	0	0	0	0	0.00438701	0	0	0	0	0	0	0.00815467	0	0	0	0	0.00729629	0	0	0.00234965	0	0	0	0	0	0.00468343	0	0	0	0	0	0	0	0
1700030O20Rik	0	0	0	0	0	0.00320901	0	0.00412588	0	0	0	0	0	0	0	0	0	0	0	0	0	0	0	0	0.00877401	0	0	0	0	0	0	0	0	0	0	0	0	0	0	0	0	0.00900191	0	0	0	0	0	0	0
1700031A10Rik	0.00305351	0	0.0165035	0	0.00686284	0	0.00315067	0	0	0	0.0137257	0	0	0.00714585	0.0157533	0.00407734	0.00459038	0.0106638	0	0	0.00753421	0	0	0	0.0139065	0	0.00815467	0	0	0	0	0	0	0.00894383	0.00704895	0	0	0	0	0	0.00468343	0	0	0	0.0115525	0	0.00587413	0.0231049	0.0066014
1700034H15Rik	0.0152676	0.00936685	0	0	0.0137257	0.0160451	0.0346574	0.0453846	0.0228009	0.037266	0.02402	0	0.0157533	0.0470551	0.0315067	0.012232	0.0256371	0.0319914	0.0202379	0.0464363	0.0301368	0.00962704	0.00943057	0.0646937	0.0226805	0.038085	0.00815467	0.0231049	0.0187337	0.035546	0.0535339	0.051074	0.146171	0.0383912	0.0272206	0.0173287	0.0253204	0.00509667	0	0	0.0421508	0.0180038	0.035546	0	0.0231049	0	0.0117483	0	0.0264056
1700034I23Rik	0	0	0	0	0.00686284	0	0.00630134	0	0.00456018	0	0	0	0	0.00714585	0.00525112	0	0.00459038	0	0	0	0	0	0	0	0	0	0	0	0	0	0	0	0	0	0	0.00577623	0	0	0	0	0	0	0	0	0	0	0	0	0
1700034J05Rik	0	0	0	0	0	0.00641803	0	0	0.00456018	0.0074532	0	0	0	0	0	0.00407734	0	0	0	0	0	0	0	0	0	0	0	0	0	0	0	0	0	0	0	0	0	0	0	0	0	0	0	0	0	0	0.00587413	0	0
1700034K08Rik	0	0	0	0	0	0.00320901	0	0	0.0117879	0	0	0	0	0	0.0157533	0.00407734	0.00459038	0	0	0	0	0	0	0.0146482	0.00877401	0	0	0	0	0	0	0.00729629	0	0	0	0	0.00316506	0	0	0	0	0	0	0	0	0	0.00587413	0	0.0066014
1700034P13Rik	0.0183211	0.00936685	0.033007	0	0.0411771	0.0256721	0.0315067	0.0625892	0.0592823	0.0639854	0.02402	0.0203867	0.0315067	0.0684927	0.0157533	0.0431585	0.0413134	0.0319914	0.0252973	0.021935	0.00753421	0.00962704	0.0282917	0.0646937	0.017548	0.015234	0.0326187	0.0770164	0.0374674	0.017773	0.030429	0.0145926	0.0815467	0.053663	0.0375944	0.0346574	0.0474758	0.0254834	0.115525	0	0.0374674	0.0322715	0.0266595	0.07245	0.0346574	0.0282917	0.0479912	0.0231049	0.033007
1700037C18Rik	0.0488562	0.0562011	0.0495105	0.0231049	0.0549027	0.0385082	0.0409587	0.0354205	0.0182407	0.101251	0.08093	0.12232	0.0315067	0.0500209	0.0525112	0.0635451	0.048589	0.0213276	0.106249	0.0727584	0.0828763	0.0673893	0.0782029	0.0646937	0.026322	0.045702	0.0652374	0.132237	0.0749348	0.152581	0.030429	0.0583703	0.105398	0.0428632	0.0464171	0.0346574	0.0683176	0.118956	0.0385082	0	0.0374674	0.0270057	0.0444325	0.105457	0.0462098	0.0565834	0.117483	0.0231049	0.0605344
1700037H04Rik	0.916211	0.901731	0.897718	0.65615	0.744956	0.943164	0.952093	0.920982	0.728385	0.859348	1.1205	0.719302	0.888419	0.901523	0.996789	0.693594	0.975826	0.819981	0.893033	0.762481	0.834883	0.881853	0.981799	0.940463	0.641048	0.765087	0.804727	0.561527	0.849585	0.943284	0.824929	0.810103	1.11094	0.8553	0.966503	0.885738	0.973472	0.997484	0.923569	0.9678	0.925094	0.813601	0.909956	0.962471	0.850468	0.731772	0.651031	1.07155	0.78382
1700039M10Rik	0	0	0	0	0.00686284	0	0	0.00825175	0.00456018	0	0.00343142	0	0	0	0.00525112	0.00407734	0.00459038	0	0.00505947	0.00438701	0.00753421	0	0	0	0	0.007617	0	0	0	0	0	0	0	0	0.0046993	0	0.00633011	0	0	0	0	0	0	0	0	0	0	0	0
1700040D17Rik	0.0048397	0	0	0	0	0.00320901	0.00315067	0	0	0	0.00343142	0	0	0.00714585	0	0	0	0	0	0	0	0	0	0	0	0	0	0	0	0	0	0	0	0	0	0	0.00316506	0	0	0	0	0	0	0	0	0	0	0	0
1700040L08Rik	0	0	0	0	0	0	0	0	0	0	0	0	0	0	0.00525112	0	0	0	0	0	0	0	0	0	0	0	0	0	0	0	0	0	0	0	0	0	0.00316506	0.00509667	0	0	0	0	0	0	0	0	0	0	0
1700041G16Rik	0	0.00936685	0	0	0.0137257	0.00320901	0.00315067	0.00412588	0.00456018	0	0	0	0	0.00714585	0.00525112	0.00407734	0.00459038	0	0	0	0	0	0.00471529	0	0.0226805	0	0	0	0	0	0.00462098	0	0	0	0.00234965	0.00577623	0	0.0182714	0	0	0.00468343	0.00900191	0	0	0	0	0.00587413	0	0.0066014
1700042D02Rik	0	0	0	0	0	0	0	0	0	0	0	0	0	0	0	0	0	0	0	0	0	0	0	0	0	0	0	0	0	0	0	0	0	0	0.00234965	0.00577623	0	0	0	0	0.00468343	0	0	0	0	0	0	0	0.0066014
1700042O10Rik	0.0633753	0.0281006	0.066014	0.0231049	0.0863686	0.0192541	0.04726	0.10556	0.0820832	0.0074532	0.0274514	0.0407734	0.0407218	0.0285834	0.0870895	0.0186944	0.0531794	0.053319	0.0202379	0.017548	0.0678079	0.720991	0.605554	0.573727	0.0701921	0.060936	0.0863169	0.0154033	0	0.017773	0.0535339	0.102148	0	0.103614	0.0934101	0.0669174	0.0928623	0.0819382	0.115525	0.173287	0.0562011	0.0720153	0.0851768	0.116459	0.135798	0.0495105	0.0210585	0.0231049	0.268691
1700044C05Rik	0.00305351	0	0	0	0.00686284	0	0	0	0	0	0.00343142	0	0	0	0	0	0	0	0	0	0	0	0	0	0	0	0	0	0	0	0	0	0	0	0.00234965	0	0.00633011	0.00509667	0	0	0	0	0	0	0	0	0	0	0
1700047I17Rik2	0	0	0	0	0	0.00320901	0	0	0	0	0	0	0	0	0	0.00407734	0	0	0	0	0	0	0	0	0	0	0	0	0	0	0	0	0	0	0	0.00577623	0	0.00509667	0	0	0	0	0	0	0	0	0	0	0
1700047K16Rik	0	0	0	0	0.00686284	0	0	0	0	0.0074532	0	0	0	0	0.00525112	0.00407734	0	0	0.00505947	0.00438701	0	0	0.00943057	0	0.00877401	0.015234	0.00815467	0	0	0	0	0.00729629	0	0	0.00234965	0	0.00316506	0	0	0	0.00742306	0.00900191	0	0	0	0	0.0117483	0	0
1700047M11Rik	0	0	0	0	0	0	0	0	0	0	0	0	0	0	0	0	0	0	0	0	0	0	0.00471529	0	0	0	0	0	0	0	0	0	0	0	0	0	0	0.0101933	0	0	0	0	0	0	0	0.0141459	0	0	0
1700048O20Rik	0.00305351	0	0	0.0231049	0.00686284	0.00641803	0.00630134	0.00412588	0.00456018	0	0	0	0	0	0	0.012232	0	0	0	0.00438701	0	0	0.00943057	0	0	0.015234	0	0.0308065	0	0.035546	0	0	0	0.00447192	0.0046993	0	0.00316506	0	0	0	0	0	0	0	0	0	0.0117483	0	0.0066014
1700049E22Rik	0	0	0	0	0	0	0	0	0	0	0	0	0	0	0	0	0.00459038	0	0	0	0	0	0	0	0	0	0	0	0	0	0	0	0	0.00894383	0	0	0	0	0	0	0	0.00900191	0	0	0	0	0	0	0
1700051A21Rik	0	0	0	0	0	0	0	0.00412588	0	0.0074532	0	0	0	0	0	0	0	0	0	0	0	0	0.00943057	0	0	0	0	0	0	0	0	0	0	0	0	0.00577623	0.00316506	0.00509667	0	0	0.00936685	0	0	0	0.0115525	0	0	0	0
1700052K11Rik	0.0493751	0.117882	0.193997	0.0828302	0.116668	0.10832	0.101357	0.0808051	0.181289	0.104345	0.0877928	0.113859	0.128704	0.13402	0.0660851	0.112473	0.096398	0.12354	0.09403	0.0877401	0.0841565	0.126787	0.104538	0.11788	0.0877401	0.103477	0.12232	0.167548	0.24513	0.106638	0.0831777	0.0845272	0.0815467	0.0741666	0.0765633	0.103972	0.056971	0.146554	0.192541	0	0.0991478	0.144031	0.0903751	0.105457	0.0991774	0.149733	0.147851	0.105935	0.116085
1700054O05Rik	0	0	0	0	0	0	0	0.00412588	0	0	0	0	0	0	0	0	0.00459038	0	0	0	0	0	0	0	0	0	0	0	0	0	0	0	0	0	0	0	0	0	0	0	0	0	0	0	0.0115525	0	0	0	0
1700055D18Rik	0.0188399	0	0	0.0231049	0.0137257	0.00641803	0	0.00825175	0.0182407	0.0149064	0.0171571	0.0203867	0.0157533	0.00714585	0.00525112	0.00815467	0.0145512	0	0.0202379	0.00877401	0	0.00962704	0.00471529	0	0	0.007617	0.00815467	0.0154033	0.00936685	0.053319	0.00924196	0.00729629	0.0407734	0.0134158	0.00234965	0.00577623	0.0126602	0.00807803	0	0	0.0140503	0.00900191	0.0088865	0.0220047	0	0.00707293	0.0234965	0.0231049	0.0066014
1700056E22Rik	0.012214	0.0374674	0	0	0.0343142	0.0160451	0.00630134	0.0165035	0.0364814	0.0298128	0.00686284	0.0730855	0	0.0142917	0.0157533	0.0186944	0.0275423	0.0213276	0.00505947	0.021935	0.00753421	0.0481352	0.0141459	0.0277259	0.026322	0.111094	0.048928	0.0860267	0.00936685	0.088865	0.0184839	0	0.0407734	0.0134158	0.0187972	0.0173287	0.00949517	0.0764501	0.0385082	0.173287	0.00936685	0.0180038	0	0.0220047	0.0462098	0.0282917	0.0411189	0	0.0198042
1700056N10Rik	0.0488562	0.0562011	0.148532	0.0231049	0.0589173	0.0532214	0.0409587	0.0536364	0.0627247	0.0596256	0.0637728	0.154632	0.0157533	0.0756385	0.0630134	0.06116	0.0642653	0.0702207	0.0484948	0.0394831	0.0226026	0.0288811	0.0546264	0.107068	0.0402285	0.060936	0.0733921	0.0462098	0.0468343	0.071092	0.0462098	0.0364814	0	0.053663	0.0460178	0.0808672	0.0638389	0.0713534	0.0385082	0	0.040207	0.0825469	0.053319	0.0770164	0.0462098	0.0919481	0.103296	0.0462098	0.066014
1700057G04Rik	0	0	0	0	0.00686284	0	0	0.00412588	0.00456018	0.0074532	0	0	0	0	0	0	0	0	0.00505947	0	0	0	0	0	0	0	0	0	0	0	0	0	0	0	0.00234965	0	0	0	0	0	0	0	0	0	0	0	0	0	0
1700057H21Rik	0.00610702	0	0	0	0	0.00320901	0.00630134	0	0.0136805	0	0.0102943	0	0.0315067	0	0.0157533	0.012232	0.0183615	0	0	0	0.0301368	0	0.00943057	0	0	0	0	0	0	0	0.00462098	0	0	0	0.00704895	0.00577623	0.00949517	0	0	0	0.0187337	0.00900191	0.017773	0.0220047	0	0	0	0	0.0066014
1700058P15Rik	0.00305351	0	0	0	0	0	0.00315067	0.00412588	0	0.0074532	0	0	0	0	0	0	0	0	0.00505947	0	0	0	0	0	0	0	0	0	0	0	0.00462098	0	0	0.00447192	0.00704895	0	0.00316506	0	0	0	0	0	0	0	0	0	0	0	0
1700060C20Rik	0	0	0.033007	0	0.00686284	0.00320901	0.00315067	0.00825175	0	0	0	0	0	0	0.00525112	0	0	0.0106638	0	0	0	0	0	0	0	0	0	0	0	0	0.00462098	0	0	0.00447192	0.00234965	0.0115525	0.00316506	0	0	0	0	0	0.0088865	0.0220047	0	0	0	0	0
1700061E17Rik	0	0	0	0	0	0.00320901	0	0	0	0	0	0	0	0	0	0.012232	0	0	0.0151784	0	0.00753421	0	0	0	0	0	0	0	0	0	0.00462098	0.00729629	0	0	0	0	0	0	0	0	0	0	0	0	0.0115525	0	0	0	0
1700061G19Rik	0.115804	0.127248	0.167839	0.12904	0.229972	0.137746	0.238977	0.21735	0.18585	0.108705	0.0918073	0.134246	0.223224	0.202512	0.245515	0.0839318	0.239915	0.140441	0.117228	0.0595973	0.298955	0.274465	0.335071	0.222517	0.138234	0.150473	0.0652374	0.0937283	0.104627	0.088865	0.183707	0.220128	0.227718	0.199044	0.230711	0.270614	0.243233	0.0488514	0.0770164	0	0.181345	0.113289	0.240777	0.210914	0.214702	0.0353647	0.0646154	0.281185	0.117207
1700061N14Rik	0	0	0	0	0	0	0	0	0	0	0	0	0	0	0	0	0	0.0106638	0	0	0	0	0	0	0	0	0	0	0	0	0	0	0	0	0	0	0	0	0	0	0	0	0.0088865	0	0	0	0	0	0.0066014
1700062C10Rik	0.0048397	0	0.0165035	0	0	0	0.011295	0	0.0182407	0	0	0	0	0	0.00525112	0	0	0.0213276	0	0	0	0	0.00943057	0.0184839	0.026322	0	0	0	0.065568	0	0.00462098	0.00729629	0.0407734	0.00447192	0	0.00577623	0	0	0	0	0.0140503	0.00900191	0.0088865	0	0	0	0	0	0.0132028
1700063D05Rik	0	0	0	0.0828302	0.0205885	0	0.00315067	0	0	0.0447192	0.0102943	0.0677231	0	0.00714585	0	0.00407734	0	0.0106638	0.00505947	0.00438701	0.0150684	0	0	0	0	0.007617	0	0	0	0	0.00924196	0	0	0	0.0046993	0	0	0	0	0	0	0	0	0	0	0.0395021	0.0528672	0	0
1700063H04Rik	0.00916054	0.00936685	0.033007	0	0.0137257	0.0160451	0.018904	0.0165035	0.050162	0	0.00686284	0	0.0157533	0.00714585	0.0157533	0.00407734	0.0210467	0	0.0151784	0	0.00753421	0	0.0451958	0.0554518	0.026322	0.007617	0	0.00770164	0.00936685	0	0.0277259	0.0364814	0.0815467	0.0402473	0.0281958	0.00577623	0.00949517	0.00509667	0	0	0.0234171	0.0180038	0.035546	0.033007	0	0.00707293	0	0.0462098	0.0066014
1700063J08Rik	0.00916054	0.103035	0.033007	0.0462098	0.0137257	0.0500124	0.0252054	0.0206294	0.0228009	0.0223596	0.0171571	0.06116	0.0157533	0.0428751	0.0315067	0.024464	0.0275423	0.0426552	0.0434353	0.0420493	0.0452053	0.0288811	0.033007	0	0.017548	0.0196897	0.024464	0.00770164	0.0281006	0	0.03505	0.00729629	0.0407734	0.0268315	0.0530668	0.0529676	0.0221554	0.00509667	0	0	0.0234171	0.0360076	0.0088865	0.033007	0.0414151	0.0282917	0.0621774	0.0693147	0.0473316
1700064H15Rik	0	0	0	0	0.00686284	0	0.00315067	0	0	0.0074532	0	0	0	0	0	0	0	0	0	0	0	0	0	0	0	0	0	0.00770164	0	0	0.00462098	0	0	0	0	0	0	0	0	0	0	0	0	0	0	0	0	0	0
1700064M15Rik	0	0	0	0	0	0	0	0	0	0	0	0.0203867	0	0	0	0	0	0	0	0	0	0	0	0	0	0	0	0	0	0	0	0	0	0	0	0	0	0	0	0	0	0	0	0	0	0	0	0	0
1700065D16Rik	0	0.0187337	0.033007	0	0	0	0.00315067	0.00825175	0.0136805	0.0074532	0.00343142	0	0.0157533	0.00714585	0	0.00815467	0	0	0.00505947	0.013161	0	0.00962704	0.00943057	0.00924196	0.00877401	0	0.00815467	0.00770164	0	0	0.00462098	0.00729629	0	0.0134158	0.00939861	0	0.0189903	0.00509667	0.0385082	0	0.0187337	0.00900191	0.0266595	0.0110023	0	0.0141459	0.00587413	0.0231049	0
1700066B17Rik	0	0	0	0	0.0137257	0.00320901	0.0157533	0.00825175	0.00912036	0	0.00343142	0.0203867	0	0.0256176	0.0157533	0	0.00459038	0	0	0	0.0226026	0.0192541	0.0141459	0.00924196	0	0	0	0	0.00936685	0	0	0.0145926	0.0407734	0.00447192	0.0131227	0	0.00949517	0	0	0	0.0140503	0	0	0	0	0	0.0117483	0.0231049	0.0066014
1700066B19Rik	0.012214	0.0187337	0	0	0.0205885	0.0339673	0.00945201	0.0165035	0.0136805	0.049079	0.0171571	0	0.0315067	0.00714585	0.0262556	0.0163093	0.0137711	0.0213276	0.0303568	0.026322	0	0.00962704	0.0235764	0.0184839	0	0.007617	0.048928	0	0.0374674	0.035546	0.00924196	0.0145926	0	0.0134158	0.0140979	0.0173287	0.0126602	0.03058	0	0	0.0234171	0.00900191	0.0266595	0.0220047	0	0.0677938	0.0352448	0.0231049	0.0341288
1700066M21Rik	0.10843	0.132728	0.101825	0.105935	0.153315	0.0981476	0.132863	0.120351	0.140248	0.245834	0.147293	0.146171	0.119489	0.122694	0.105915	0.0985489	0.122815	0.0915483	0.117228	0.101647	0.141303	0.134779	0.157207	0.158684	0.155782	0.192877	0.193713	0.124535	0.0936685	0.071092	0.135579	0.102148	0	0.103614	0.136103	0.0760725	0.12714	0.0883755	0.0770164	0.346574	0.117882	0.172566	0.161467	0.099021	0.0760725	0.288927	0.320754	0.0828302	0.0924196
1700067K01Rik	0.0170537	0.0374674	0.0165035	0	0	0.0243403	0.028356	0	0.00912036	0.0223596	0.0102943	0	0.0157533	0.0142917	0.0157533	0.00407734	0.0183615	0.0106638	0.0231975	0.00877401	0.00753421	0.00962704	0.0141459	0.00924196	0	0.015234	0.00815467	0.0462098	0.0187337	0.035546	0.00462098	0.0145926	0	0	0.0117483	0.00577623	0.0221554	0.0203867	0.0385082	0.173287	0.00468343	0.00900191	0.0088865	0.0220047	0	0	0	0	0.0066014
1700069B07Rik	0	0	0	0	0	0	0.00315067	0	0	0.0074532	0	0	0	0	0	0	0	0	0	0	0	0	0	0	0	0	0	0.00770164	0	0	0	0	0	0	0	0	0	0	0	0	0	0.00900191	0.0088865	0.0110023	0	0.0212188	0.0563033	0	0
1700069L16Rik	0	0	0	0	0.0137257	0.00320901	0.00315067	0.00412588	0	0	0.00343142	0	0.0157533	0	0	0	0.00459038	0	0	0	0	0	0	0	0	0.007617	0.00815467	0	0	0	0.00462098	0	0	0.00447192	0.00234965	0.00577623	0.00949517	0	0	0	0	0	0	0	0	0	0	0	0
1700071M16Rik	0	0.00936685	0	0	0	0	0	0	0	0	0	0	0	0	0	0	0	0	0	0.00438701	0.00753421	0.0192541	0.0141459	0.00924196	0.00877401	0	0	0	0	0	0	0	0	0	0	0.00577623	0	0	0	0	0	0	0	0	0	0	0	0	0
1700081N11Rik	0.00305351	0.00936685	0	0	0.00686284	0	0.00630134	0.00825175	0	0	0.0137257	0	0	0.00714585	0.0157533	0	0	0	0	0	0	0.0192541	0.00471529	0	0	0	0	0	0.0187337	0	0	0.00729629	0	0.00447192	0.00234965	0	0	0.00509667	0	0	0	0.00900191	0	0	0	0.00707293	0.0234965	0	0.0066014
1700082M22Rik	0	0	0	0	0	0	0	0	0	0	0.00343142	0	0	0	0	0	0	0	0	0	0	0	0	0	0	0	0	0	0	0	0.00462098	0	0	0	0	0	0	0	0	0	0	0	0	0	0	0.00707293	0.00587413	0	0
1700084C06Rik	0.00610702	0.00936685	0	0	0	0.00320901	0.00499369	0.00825175	0.0182407	0.0074532	0.00343142	0.0203867	0	0.00714585	0	0.00407734	0	0	0.0101189	0.00877401	0.00753421	0	0.00471529	0.00924196	0	0.007617	0	0.00770164	0	0.017773	0	0.0145926	0	0.00447192	0.0046993	0	0.00316506	0.0101933	0	0.173287	0.00936685	0	0	0.0110023	0	0	0.00587413	0	0
1700084E18Rik	0.0244281	0.0281006	0.0165035	0	0.0274514	0.00962704	0.030199	0.0371329	0.0182407	0	0.0308828	0.0407734	0.04726	0.0214375	0.0210045	0.024464	0.0275423	0.0106638	0.0252973	0.017548	0.00753421	0.00962704	0.00471529	0	0.00877401	0	0	0.0539114	0.0187337	0.017773	0.00924196	0.0291851	0	0.0268315	0.0140979	0.00577623	0.0189903	0.03058	0.0385082	0	0.00468343	0	0.0088865	0.0220047	0.0231049	0.00707293	0.0176224	0	0.0264056
1700086D15Rik	0.00305351	0	0	0	0	0.00641803	0.00315067	0.00825175	0.00912036	0	0.00343142	0.0203867	0	0.0142917	0	0.00815467	0	0.0106638	0.00505947	0	0	0	0.00471529	0.0184839	0	0	0.00815467	0	0	0.017773	0	0.00729629	0	0	0	0	0	0	0	0	0.00468343	0.00900191	0	0.0220047	0.0115525	0.00707293	0.00587413	0	0.0066014
1700086O06Rik	0.0506424	0.108515	0.033007	0.317805	0.116668	0.0711436	0.0774591	0.0643016	0.0710702	0.101251	0.123273	0.0934722	0.0945201	0.0357292	0.0765873	0.0716998	0.0990832	0.0106638	0.0839111	0.0614181	0.0904105	0.0962704	0.0923487	0.0978258	0.0840986	0.038085	0.0897014	0.0385082	0.0991478	0.053319	0.0627759	0.0480458	0.0815467	0.0767825	0.0920357	0.0231049	0.056971	0.10155	0.253575	0.346574	0.072991	0.108023	0.0266595	0.113565	0.0760725	0.106094	0.174784	0.0963457	0.12767
1700086P04Rik	0.0687339	0.0562011	0.099021	0.0231049	0.109805	0.0684799	0.0937478	0.10556	0.0710702	0.086345	0.0692115	0.0646243	0.0630134	0.0768528	0.0660851	0.0285414	0.085312	0.0595569	0.0818112	0.0709376	0.155091	0.0385082	0.112011	0.0646937	0.0665506	0.07617	0.0652374	0.0430133	0.103035	0.106638	0.0785567	0.0948517	0	0.101758	0.0883116	0.0231049	0.0841429	0.0730855	0.0385082	0.173287	0.0468343	0.0540115	0.0799785	0.0440093	0.0712778	0.0395021	0.0915481	0.0231049	0.0528112
1700087M22Rik	0	0	0	0	0	0	0	0	0	0	0	0	0	0	0	0.00407734	0	0	0	0	0	0	0	0	0	0	0	0	0	0	0	0	0	0	0	0	0	0.0101933	0	0	0	0	0	0	0.0115525	0	0	0	0
1700088E04Rik	0.0244281	0.00936685	0	0.0231049	0.0343142	0.0275493	0.0157533	0.00825175	0.0254684	0.0149064	0.0171571	0.0203867	0	0.0142917	0.0367578	0.0203867	0.0275423	0.0319914	0.0383759	0.00438701	0.0150684	0.0730208	0.0141459	0	0	0.030468	0.0570827	0.0462098	0.0281006	0.017773	0.00462098	0.0291851	0.0815467	0.0178877	0.0140979	0.0115525	0.00949517	0.0590447	0	0	0.0234171	0	0.017773	0.0440093	0.0231049	0.0790041	0.0563033	0	0.033007
1700092C10Rik	0	0.00936685	0	0	0	0.00320901	0	0	0	0	0	0	0	0	0	0	0	0	0	0	0	0	0	0	0	0	0.00815467	0.0154033	0	0	0	0	0	0	0	0	0	0	0	0	0	0	0	0	0	0	0	0	0
1700092M07Rik	0.0262143	0.0187337	0.033007	0	0.0137257	0.0128361	0.0157533	0.0206294	0.0182407	0.0074532	0.0274514	0.0730855	0	0.0214375	0.0157533	0.0203867	0.00918076	0.0106638	0.0151784	0.021935	0.0527395	0.0288811	0.0188611	0.0277259	0.00877401	0.022851	0.024464	0.0154033	0.0187337	0.017773	0.0323469	0.0218889	0	0.0223596	0.00939861	0.00577623	0.0221554	0.00509667	0	0	0.0281006	0.0180038	0.0266595	0.033007	0.0115525	0.0141459	0.00587413	0	0.0066014
1700093J21Rik	0	0	0	0	0	0	0	0	0	0	0	0	0	0	0	0	0	0	0.00505947	0	0	0.00962704	0	0	0	0	0	0	0	0	0	0	0	0	0	0	0	0	0	0	0	0	0	0.0110023	0	0.00707293	0	0	0
1700093K21Rik	0.00305351	0	0	0	0	0	0	0	0	0.0074532	0.00343142	0	0	0.00714585	0	0.00407734	0.00459038	0	0	0	0	0	0.00471529	0	0.00877401	0	0	0	0	0	0	0	0	0	0	0	0	0	0.0770164	0	0	0	0	0.0110023	0	0	0	0	0
1700094D03Rik	0.103021	0.0562011	0.132028	0.0462098	0.153315	0.0513442	0.121568	0.131139	0.133795	0.155654	0.0697946	0.0815467	0.0722285	0.0786043	0.14771	0.0968567	0.0933676	0.12354	0.0607136	0.0834513	0.109886	0.0770164	0.066014	0.0831777	0.0701921	0.161693	0.337806	0.0661183	0.0779503	0.035546	0.113962	0.139869	0.0815467	0.0741666	0.0826371	0.0693147	0.0848468	0.0641414	0.115525	0.173287	0.120431	0.114818	0.0799785	0.118329	0.0876249	0.099021	0.12281	0.0693147	0.285246
1700094J05Rik	0	0	0	0	0	0.00320901	0	0	0	0	0.00343142	0.0203867	0.0157533	0.00714585	0	0	0	0	0	0.00877401	0	0	0	0	0	0	0	0	0.0187337	0	0.00924196	0.00729629	0	0.00894383	0.0046993	0.00577623	0	0	0	0	0	0.00900191	0	0	0	0.0141459	0.0117483	0	0.0066014
1700095A21Rik	0	0	0	0	0	0.00641803	0.00315067	0.00412588	0	0	0.00343142	0	0.0157533	0	0.0105022	0.00407734	0.00459038	0	0.00505947	0.00877401	0.00753421	0	0	0.00924196	0	0	0	0	0	0	0.00924196	0	0	0.00894383	0	0	0	0	0	0	0	0.0180038	0.0088865	0.0110023	0	0	0	0	0
1700096K18Rik	0.0847499	0.188057	0.220154	0.0462098	0.11382	0.119824	0.124426	0.122765	0.114779	0.120518	0.154156	0.142707	0.166749	0.111368	0.135242	0.0903942	0.144987	0.0746466	0.0839111	0.111166	0.118701	0.0922749	0.132829	0.134794	0.0980051	0.097154	0.163093	0.161155	0.0710472	0.159957	0.107068	0.0960915	0.0407734	0.170693	0.127503	0.147785	0.18017	0.0926061	0.346574	0	0.193612	0.0630134	0.10295	0.186015	0.127077	0.114369	0.117483	0.142556	0.0962812
1700097N02Rik	0.0809479	0.0616804	0.158185	0.188765	0.268022	0.0775616	0.171156	0.220998	0.0984313	0.0727051	0.0589173	0.0646243	0.150995	0.0643126	0.145744	0.0910871	0.138146	0.0808845	0.295648	0.0990804	0.17144	0.00962704	0.112011	0.0978258	0.0614181	0.066686	0.0700076	0.0462098	0.0187337	0.198523	0.189898	0.145377	0.146171	0.204276	0.158406	0.163697	0.230816	0.0284647	0.115525	0.173287	0.184245	0.0952849	0.221494	0.107327	0.11073	0.0424376	0.0773618	0.138629	0.0462098
1700100L14Rik	0	0	0	0	0	0	0	0	0	0	0	0	0	0	0	0	0	0	0	0	0	0	0	0	0	0	0	0	0	0	0	0	0	0	0	0	0	0.0314461	0	0	0	0	0	0	0	0	0	0	0
1700101I11Rik	0.00610702	0	0	0	0	0.00320901	0	0.00412588	0	0.0074532	0.00686284	0	0	0	0.0105022	0.00407734	0.00918076	0	0	0	0	0	0	0	0	0	0	0	0.0187337	0	0.00462098	0	0	0	0	0	0	0	0	0	0	0	0	0	0.0115525	0.0282917	0.00587413	0	0.0066014
1700102H20Rik	0.0463215	0.0616804	0.115525	0.0924196	0.0343142	0.109652	0.110809	0.084931	0.0973135	0.0298128	0.0686284	0.0730855	0.14178	0.0798186	0.0682645	0.0448507	0.0872172	0.0319914	0.0636732	0.0639843	0.0904105	0.0770164	0.0782029	0.0700999	0.0438701	0.030468	0.0326187	0.0584166	0.0897809	0.053319	0.0839629	0.081499	0.0407734	0.0633667	0.0798881	0.0924196	0.0656904	0.0590447	0.0385082	0.173287	0.0495739	0.0540115	0.0799785	0.0770164	0.0414151	0.0636564	0.10917	0.0924196	0.0962812
1700102P08Rik	0.0183211	0.0616804	0.0495105	0.0231049	0.0480399	0.0385082	0.056712	0.0495105	0.0528295	0.0074532	0.0377456	0.0203867	0.0722285	0.0357292	0.0481523	0.0326187	0.0761313	0.0319914	0	0.0245013	0.037671	0.0192541	0.0357653	0.0700999	0.026322	0.022851	0.0326187	0.00770164	0.0523135	0.035546	0.0508308	0.0437777	0	0.053663	0.0389689	0.0693147	0.0493273	0.00509667	0.0385082	0.173287	0.065568	0.0540115	0.0622055	0.033007	0.0462098	0.0212188	0.0176224	0.115525	0.0264056
1700104B16Rik	0	0	0	0	0	0	0	0.00412588	0	0	0	0	0	0	0	0	0	0	0.00505947	0	0	0	0	0	0	0	0	0	0	0	0	0	0	0	0.00234965	0	0	0	0	0	0	0	0	0	0	0	0	0	0
1700105P06Rik	0.0366421	0.065568	0.0825175	0.0231049	0.0932315	0.0449262	0.0491031	0.0477981	0.0364814	0.0149064	0.0431843	0.06116	0.0157533	0.0285834	0.0630134	0.0309264	0.0623601	0.0426552	0.0404757	0.0614181	0.0527395	0.00962704	0.0565834	0	0.0614181	0.0349237	0.024464	0.0892232	0.0281006	0.035546	0.0415888	0.051074	0	0.0581349	0.0497419	0.0438125	0.0443108	0.01529	0.0770164	0.173287	0.0589408	0.064543	0.0992616	0.099021	0.0462098	0.0536479	0.0563033	0.0462098	0.0528112
1700108F19Rik	0.00916054	0.00936685	0	0	0.0205885	0.0128361	0.0126027	0.0395464	0.0182407	0.0074532	0.0205885	0.0203867	0.0630134	0.0500209	0.0315067	0.00407734	0.0577697	0.0213276	0.0202379	0.00438701	0.0345441	0.0673893	0.0357653	0.0477803	0.017548	0	0.00815467	0	0.00936685	0.017773	0.030429	0.0145926	0.0407734	0.0268315	0.0211469	0.0404336	0.0353534	0	0	0	0.0214733	0.00900191	0.0472933	0.033007	0	0	0.0117483	0	0.0528112
1700109G14Rik	0	0	0	0.0231049	0.00686284	0.00641803	0	0	0	0	0	0	0	0	0	0	0	0	0.00505947	0	0	0	0	0	0	0	0	0	0	0	0	0	0	0.00447192	0	0	0	0	0	0	0	0.00900191	0	0	0	0	0	0	0
1700109H08Rik	0.0353748	0.0804141	0.0165035	0.0462098	0.0617656	0.0481352	0.0522537	0.0495105	0.0782979	0.0447192	0.0623487	0.142707	0.0722285	0.0285834	0.0262556	0.0553905	0.0677305	0.0426552	0.0404757	0.0658051	0.0678079	0.0481352	0.0573847	0.0184839	0.0350961	0.045702	0.0407734	0.0693147	0.0749348	0.127431	0.0462098	0.0669064	0.0815467	0.051807	0.0507171	0.051986	0.0588224	0.03058	0.115525	0	0.0421508	0.086283	0.0674038	0.0550117	0.0529676	0.0565834	0.0939861	0.0231049	0.0896798
1700109K24Rik	0	0.00936685	0	0	0.00686284	0	0	0.00412588	0	0	0	0	0	0.00714585	0.00525112	0	0	0	0.0151784	0	0	0.00962704	0.00471529	0	0	0	0	0	0	0	0.00462098	0	0	0.00447192	0.00234965	0.0149313	0	0.00509667	0	0	0	0	0.017773	0	0	0	0.00587413	0	0
1700110C19Rik	0	0	0	0	0	0	0	0	0	0	0	0	0	0	0	0	0.00459038	0	0	0	0	0	0	0	0	0	0	0	0	0	0	0	0	0	0.00234965	0	0	0	0	0	0	0.00900191	0	0	0	0	0	0	0
1700110I01Rik	0	0	0	0	0	0	0.00315067	0.00412588	0	0	0	0	0	0	0	0	0	0	0.00505947	0.00438701	0	0	0	0	0	0	0	0	0	0	0	0	0	0	0	0	0	0	0	0	0	0	0	0	0	0	0	0	0
1700110K17Rik	0.00305351	0	0	0	0.00686284	0	0	0.00412588	0.00722771	0	0	0.0203867	0	0.00714585	0	0	0	0	0	0.00438701	0.00753421	0	0.00471529	0	0	0	0	0.00770164	0	0	0.00462098	0	0	0	0.0046993	0	0	0.00509667	0	0	0	0	0	0.0110023	0	0.00707293	0.0176224	0	0
1700112D23Rik	0.00610702	0.00936685	0.033007	0	0	0.00962704	0.0270484	0.0206294	0.00912036	0.0074532	0.0137257	0.0203867	0.0157533	0.0256176	0.0157533	0.00646243	0.0229519	0.0213276	0	0.013161	0.0150684	0.0385082	0.0169041	0.00924196	0	0.007617	0	0.00770164	0	0	0.00924196	0.0364814	0	0.0205036	0.0211469	0.00577623	0.0158253	0.0254834	0.0385082	0	0.00468343	0.0270057	0.017773	0.0220047	0.0115525	0.0141459	0	0	0
1700112J16Rik	0	0	0	0	0	0	0	0	0.00456018	0.0149064	0.00343142	0	0	0	0	0	0.00459038	0	0	0.00438701	0	0	0.00471529	0	0	0	0	0	0	0	0.00462098	0.00729629	0	0	0	0	0	0.00509667	0	0	0.00468343	0	0	0	0	0.00707293	0	0	0.0066014
1700113A16Rik	0.043268	0.104627	0.0495105	0.0231049	0.139589	0.0853115	0.0987415	0.0625892	0.0965386	0.0907048	0.110389	0.0815467	0.0722285	0.0982903	0.0818384	0.06116	0.0826268	0.0426552	0.0788516	0.0797116	0.0904105	0.111529	0.116726	0.0700999	0.0577766	0.053319	0.0326187	0.0539114	0.108515	0.017773	0.0785567	0.102148	0.0815467	0.109942	0.0581654	0.0635385	0.0986545	0.0671228	0.115525	0	0.0757307	0.0540115	0.0799785	0.0550117	0.0231049	0.0648582	0.141977	0.0693147	0.150214
1700113B09Rik	0.00305351	0	0	0	0	0.00320901	0.00630134	0.00825175	0	0	0	0	0	0.00714585	0	0	0	0	0	0	0	0	0	0	0.017548	0	0	0.00770164	0	0.017773	0	0	0	0.00447192	0	0	0	0	0	0	0.00468343	0	0	0.0110023	0	0	0.00587413	0	0
1700116B05Rik	0	0	0	0	0	0.00320901	0	0	0	0	0	0	0	0	0	0	0	0	0	0.00438701	0	0	0	0	0	0	0	0	0	0	0	0	0	0	0	0	0	0	0	0	0	0	0	0	0	0	0	0	0
1700120B22Rik	0	0	0	0.0231049	0	0	0.00315067	0.00412588	0	0	0	0	0	0	0	0	0	0	0	0	0	0	0	0	0	0	0	0	0	0	0	0	0	0	0.00234965	0	0	0	0	0	0	0	0	0	0	0	0.00587413	0	0
1700120C14Rik	0.0396957	0.0335798	0.0165035	0	0.0549027	0.0403853	0.0653918	0.0502116	0.0410416	0.0341726	0.0343142	0.0203867	0.0157533	0.0357292	0.060834	0.0659302	0.0504942	0.0702207	0.0354163	0.0332753	0.0301368	0.0385082	0.0695735	0.0462098	0.0314545	0.007617	0.0536982	0.0231049	0.0637635	0	0.0369678	0.0784707	0.105398	0.0249755	0.0685392	0.0404336	0.0720205	0.0569294	0.176559	0	0.0140503	0.0360076	0.035546	0.0220047	0.0693147	0.0636564	0.0528672	0.0693147	0.0500714
1700121N20Rik	0	0	0	0	0	0	0	0	0	0	0	0	0	0	0	0.00407734	0	0	0	0	0	0.00962704	0.00471529	0.00924196	0	0	0	0	0	0	0	0	0	0	0	0	0	0	0	0	0	0	0	0	0.0115525	0	0	0	0
1700122E12Rik	0.00916054	0.00936685	0.0165035	0	0.0520544	0.0256721	0.018904	0.018917	0.00912036	0.0223596	0.00686284	0.0203867	0.0407218	0.0357292	0.0210045	0.0163093	0.0321327	0.0319914	0.0151784	0.013161	0.0150684	0.00962704	0.00943057	0.0184839	0	0.007617	0.024464	0.0154033	0.0281006	0.071092	0.00924196	0.0291851	0	0.0313034	0.0164476	0.0346574	0.0303369	0.00509667	0.0385082	0.173287	0.0187337	0.00900191	0.0088865	0.0550117	0	0.0495105	0.0293706	0.0231049	0.0500714
1700122O11Rik	0	0	0	0	0	0	0.00315067	0	0	0.0074532	0.00343142	0	0	0	0	0	0	0	0	0	0	0	0.00471529	0	0	0	0	0	0	0	0.00462098	0	0	0.00447192	0.00234965	0	0.00633011	0	0	0	0	0	0	0	0	0	0	0	0
1700123J17Rik	0	0	0	0	0	0	0	0	0	0	0	0	0	0	0	0.00407734	0	0	0.00505947	0	0	0	0	0	0	0	0	0	0	0	0	0	0	0	0.00234965	0	0.00316506	0	0	0	0	0	0	0	0	0	0.00587413	0	0
1700123M08Rik	0.0183211	0.0562011	0	0	0.0205885	0.0147132	0.037808	0.033007	0.0182407	0.0149064	0.0466157	0.0203867	0.0315067	0.00714585	0.0262556	0.0407734	0.0229519	0	0.0455352	0.0394831	0.0527395	0.0192541	0.0188611	0.0184839	0.0226805	0.0577747	0.0373889	0.0231049	0.0468343	0.0281695	0.0415888	0.00729629	0.0407734	0.0357753	0.0215461	0.0288811	0.0221554	0.0101933	0.0385082	0	0.0187337	0.0180038	0.035546	0.066014	0.0231049	0.0141459	0.0328068	0.0231049	0.033007
1700123O20Rik	1.23392	1.14382	1.20619	1.12909	1.17539	1.13417	1.16085	1.05897	1.14258	1.44329	1.21321	1.40885	1.1733	1.20183	1.24401	1.17174	1.21379	1.34037	1.17925	1.14945	1.16264	1.28048	1.20511	1.2828	1.1795	1.43355	1.25743	1.3419	1.17366	1.24232	1.19901	1.17111	1.37564	1.16454	1.10564	1.14744	1.17704	1.34384	1.31808	1.41574	1.22234	1.14416	1.17922	1.13976	1.23778	1.08041	1.22361	1.04505	1.15046
1700124L16Rik	0.0109467	0.00936685	0	0	0.0137257	0.0160451	0.00630134	0.00412588	0.00456018	0.0074532	0.0102943	0	0.0157533	0.0142917	0	0.00407734	0.00459038	0.0106638	0.0101189	0.00877401	0.0150684	0	0.00471529	0.00924196	0	0	0	0	0	0	0.00924196	0	0	0.00894383	0.0131227	0	0.00949517	0	0.0385082	0	0.0234171	0	0.017773	0.0110023	0	0	0.00587413	0.0231049	0.0066014
1700125G22Rik	0.00305351	0	0.0165035	0	0.0137257	0	0.00630134	0.00412588	0.00456018	0	0.00343142	0	0	0	0	0	0.00459038	0	0.0202379	0	0.00753421	0	0.00471529	0.0277259	0	0	0	0	0.0187337	0.017773	0.00924196	0.0145926	0	0.00447192	0	0.00577623	0.00316506	0	0	0	0.00468343	0	0	0.0110023	0	0.00707293	0	0	0.0132028
1700125H20Rik	0.00305351	0.00936685	0	0.0231049	0.00686284	0.00962704	0.00945201	0.00412588	0.00456018	0	0	0	0.0157533	0	0	0.00407734	0.00918076	0.0106638	0	0	0	0.0192541	0.0121888	0.0238901	0	0.0120727	0	0	0.0187337	0.035546	0.00462098	0.00729629	0	0.00447192	0.00939861	0.00577623	0	0.0509667	0	0	0	0.00900191	0	0	0.0115525	0	0	0	0.010463
1700126G02Rik	0.00610702	0.00936685	0	0	0.0205885	0	0.00315067	0	0	0	0.00343142	0	0.0157533	0	0	0	0.00459038	0	0.0101189	0	0	0	0.00943057	0	0.00877401	0	0	0.00770164	0.0187337	0	0	0	0	0	0.0046993	0	0.00316506	0	0	0	0	0	0.0088865	0	0	0	0	0	0.0066014
1810007D17Rik	0	0	0	0	0	0	0	0	0.00912036	0	0	0	0.0157533	0	0	0	0	0	0	0	0	0	0	0	0	0	0	0	0	0	0	0	0	0	0	0.00577623	0	0	0	0	0	0	0	0	0	0	0	0	0
1810009A15Rik	1.24427	1.27447	1.27992	0.996011	1.06296	1.31883	1.28798	1.30016	1.07226	1.32263	1.37591	1.39314	1.34163	1.30423	1.38319	0.972569	1.30597	1.13949	1.20074	1.14938	1.35393	1.1215	1.34535	1.22277	1.10503	1.17912	1.32259	0.749526	1.30964	0.95545	1.31055	1.33992	1.30389	1.32333	1.26391	1.21761	1.35845	0.984369	0.977432	0.621227	1.31445	1.22812	1.29481	1.10603	1.15904	1.14291	1.19629	1.37935	1.12027
1810010H24Rik	0.0152676	0.0187337	0.033007	0.0462098	0.0205885	0.0481352	0.0428017	0.00825175	0.0228009	0.0683452	0.0589173	0.0203867	0.0157533	0.0214375	0.0157533	0.0186944	0.0137711	0.0319914	0.018138	0.021935	0.0226026	0.00962704	0.00471529	0.0277259	0	0.015234	0.0210795	0.0154033	0.0281006	0	0.0138629	0.0218889	0	0.0178877	0.0201717	0.0173287	0.0189903	0.0356767	0.0770164	0.173287	0.0140503	0.0270057	0.035546	0.033007	0.0346574	0	0.0293706	0.0231049	0.0198042
1810012K08Rik	0	0	0	0	0	0	0	0	0	0	0	0	0	0	0.00525112	0	0	0	0	0	0	0.00962704	0.00471529	0	0	0	0.00815467	0	0	0	0	0	0	0	0	0	0	0	0	0	0	0	0	0.0110023	0	0	0	0	0
1810012K16Rik	0	0	0	0.0231049	0	0	0	0	0.00456018	0	0	0.0203867	0	0	0	0.00407734	0	0	0.00505947	0	0	0	0	0	0	0	0	0.00770164	0	0	0.00462098	0	0	0.00447192	0	0.00577623	0	0	0	0	0.00468343	0	0	0	0	0.00707293	0.00587413	0	0
1810013D15Rik	0.00305351	0	0	0	0	0	0	0.00825175	0.00456018	0	0	0	0	0	0.00525112	0.00407734	0.00918076	0	0.00505947	0.00438701	0.0150684	0	0.00471529	0.0184839	0	0	0	0	0.00936685	0	0	0	0	0	0.00704895	0.0115525	0.00316506	0	0	0	0	0	0	0	0	0.00707293	0	0.0231049	0
1810013L24Rik	0.331974	0.463047	0.381144	0.456435	0.362699	0.439446	0.448481	0.408859	0.368272	0.450834	0.377265	0.365427	0.34925	0.419865	0.411079	0.374195	0.363165	0.36358	0.353881	0.346	0.437575	0.39636	0.54628	0.552267	0.420493	0.354265	0.307266	0.357622	0.408269	0.481236	0.431964	0.361237	0.309264	0.412271	0.434743	0.36881	0.418097	0.514606	0.391625	0.44794	0.432398	0.436004	0.38967	0.511716	0.320637	0.502201	0.623965	0.456435	0.364328
1810014P07Rik	0.00305351	0.00936685	0	0	0	0.00320901	0	0	0.00456018	0.0074532	0.00343142	0	0	0	0.0157533	0.00407734	0	0	0	0	0	0.00962704	0	0	0	0.015234	0	0.0231049	0	0	0.00462098	0.00729629	0	0	0	0	0.00949517	0	0	0	0	0	0	0.0110023	0	0	0	0	0
1810019D21Rik	0.0183211	0.0187337	0.0495105	0.0366204	0.0549027	0.0192541	0.0157533	0.0165035	0.0273611	0.0298128	0.0102943	0.0203867	0.0157533	0.0142917	0.0367578	0.012232	0.0137711	0.0213276	0.0282569	0.026322	0.00753421	0.00962704	0.0141459	0.00924196	0.00877401	0.060936	0.048928	0.0308065	0.0187337	0.035546	0.0369678	0.0145926	0.0407734	0.0223596	0.0154724	0.0173287	0.0189903	0.0407734	0	0	0.00468343	0.00900191	0.017773	0	0.0183102	0.0353647	0.0411189	0	0.0066014
1810019N24Rik	0.00610702	0	0	0	0	0.0128361	0.00945201	0.00412588	0.00456018	0.0074532	0.00343142	0	0	0.00714585	0.00525112	0.00815467	0.00918076	0.0106638	0	0	0.00753421	0	0.00471529	0.00924196	0	0	0	0	0	0	0.00924196	0	0	0	0.0046993	0	0.00316506	0.00509667	0	0	0.00936685	0.00900191	0	0.0110023	0	0	0.00587413	0	0.0066014
1810020O05Rik	0	0.00936685	0	0	0.0137257	0.0128361	0.0220547	0.0123776	0.00912036	0.0074532	0	0	0.0157533	0.0214375	0.0105022	0	0.0183615	0.0169017	0	0.00877401	0.00753421	0	0.00943057	0.0184839	0	0	0	0.00770164	0	0	0.00924196	0.00729629	0	0.00894383	0.0164476	0.00577623	0.00316506	0.0467361	0.0385082	0	0.0187337	0	0	0.0110023	0.0183102	0	0	0	0.0066014
1810021B22Rik	0.012214	0.00936685	0.0165035	0	0.024603	0.00641803	0	0	0.00456018	0.0074532	0.0205885	0	0	0	0.00525112	0.0163093	0.00459038	0.0106638	0.00505947	0.00877401	0	0	0	0	0	0	0	0.00770164	0	0.035546	0	0.00729629	0	0	0	0.0288811	0.00316506	0	0.0385082	0	0.00468343	0.00900191	0	0.0110023	0	0	0.0176224	0	0.0066014
1810024B03Rik	0.145361	0.164716	0.108675	0.0924196	0.0411771	0.177288	0.165441	0.171264	0.182757	0.142877	0.169889	0.186944	0.157533	0.151277	0.165461	0.130168	0.198946	0.117302	0.127346	0.133101	0.195323	0.159664	0.15169	0.18798	0.150649	0.115549	0.197098	0.141247	0.123361	0.287388	0.118228	0.141109	0.350038	0.173652	0.145901	0.183423	0.18889	0.163485	0.0385082	0.173287	0.158089	0.146929	0.138496	0.149466	0.117488	0.156806	0.124355	0.22146	0.205151
1810026B05Rik	0.85664	0.758041	0.84066	0.69141	0.691214	0.636335	0.796091	0.745654	0.791826	0.51164	0.637106	0.499673	0.803472	0.826036	0.802162	0.580561	0.864941	1.17712	0.800713	0.701709	0.658061	0.652292	0.832419	0.82013	0.844731	0.66512	0.585777	0.679406	0.879262	0.53923	0.985035	0.796024	0.767832	0.786865	0.767685	0.866529	0.755379	0.600633	0.898775	1.02359	0.758359	0.756735	0.739338	0.763316	0.966692	0.428491	0.52227	0.7625	0.632297
1810030O07Rik	0.506244	0.501066	0.617506	0.718441	0.563786	0.531034	0.61732	0.702134	0.618321	0.345392	0.602528	0.618529	0.598653	0.510344	0.589224	0.49984	0.576152	0.501216	0.49496	0.443919	0.609729	0.479008	0.584203	0.683075	0.450988	0.618172	0.468841	0.367941	0.519739	0.446009	0.596462	0.507175	0.590882	0.514943	0.557155	0.635857	0.568127	0.528705	0.375643	0.44794	0.453244	0.423104	0.4985	0.615322	0.468875	0.557709	0.47473	0.577246	0.605118
1810034E14Rik	0.00305351	0	0.0165035	0	0.00686284	0.00962704	0	0.0123776	0.00456018	0	0.0137257	0	0	0.00714585	0	0	0.00918076	0.0106638	0	0	0.00753421	0.00962704	0	0	0	0.007617	0.0163093	0.00770164	0.0187337	0	0.00462098	0.0145926	0	0.0160317	0.0046993	0.00577623	0.00633011	0.00509667	0	0	0	0.00900191	0	0	0	0.00707293	0	0	0.0198042
1810037I17Rik	1.93973	1.82545	1.91815	2.12623	1.79645	2.0641	2.02142	1.83618	1.83859	1.86245	1.86452	1.78705	1.91297	1.94548	1.9745	2.21203	1.94906	1.89118	1.96262	2.05891	1.77414	2.0486	1.96229	2.04201	1.82862	1.73489	1.68867	1.89491	1.97872	1.69079	2.07311	1.92047	1.93602	2.02211	1.99822	1.8986	1.8713	2.13766	2.00786	2.41757	1.93357	1.95922	1.95945	2.04727	1.8129	2.37495	2.27579	1.99483	1.93728
1810041H14Rik	0.0152676	0.00936685	0	0.0231049	0.0274514	0.00962704	0.0220547	0.0371329	0.0254684	0.0074532	0.0205885	0	0.0157533	0	0.0105022	0.00815467	0.0137711	0	0.0101189	0.021935	0.0226026	0.0192541	0.033007	0.0184839	0.00877401	0.015234	0.00815467	0.050715	0.0187337	0	0.0277259	0.0145926	0.0407734	0.0178877	0.0295703	0.0173287	0.00949517	0.00509667	0	0	0.0140503	0.00900191	0.0266595	0.0110023	0	0.0212188	0.0763637	0.0462098	0.0264056
1810044D09Rik	0.0829637	0.112402	0.148532	0.115525	0.154997	0.0641803	0.102664	0.102837	0.118222	0.0819852	0.104109	0.06116	0.0945201	0.0857502	0.136529	0.0822396	0.133901	0.0808845	0.117228	0.0990804	0.135616	0.107533	0.103736	0.121716	0.0526441	0.038085	0.135245	0.0430133	0.0843017	0.053319	0.0932048	0.0918235	0.186944	0.113318	0.124931	0.115525	0.0968031	0.0764501	0.0385082	0.173287	0.097204	0.117025	0.120723	0.132028	0.0346574	0.113167	0.106732	0.207944	0.0462098
1810049J17Rik	0	0	0	0	0	0.00641803	0	0.00412588	0	0	0	0	0	0.00714585	0	0	0	0	0	0	0.00753421	0	0.00471529	0	0	0	0	0.00770164	0	0	0.00462098	0	0	0	0	0.0115525	0	0	0	0	0.00468343	0	0	0.0110023	0	0	0.0117483	0	0
1810055G02Rik	0.376864	0.375562	0.441549	0.234975	0.38562	0.422142	0.404665	0.470127	0.787258	0.437754	0.39126	0.525057	0.421479	0.460451	0.479645	0.44359	0.401793	0.407856	0.315026	0.408264	0.398759	0.471913	0.473948	0.397585	0.386888	0.415613	0.509147	0.252858	0.446609	0.216296	0.35207	0.388503	0.455435	0.349584	0.42086	0.381146	0.429258	0.492287	0.282644	0.44794	0.381041	0.40663	0.394709	0.344812	0.407393	0.508072	0.515397	0.43333	0.402696
1810058I24Rik	2.09113	2.02858	2.01151	1.64194	2.13347	2.08802	2.10078	2.10953	2.03497	1.2966	1.58691	1.24434	2.07275	1.94547	2.07875	1.76574	2.01877	2.07243	1.99102	2.0261	2.10875	2.29927	2.20999	2.24603	2.18326	2.07404	1.9247	2.67423	2.12696	1.72226	2.06715	2.13076	2.07132	2.1158	2.13623	2.13414	2.11574	2.49296	2.05179	2.15834	2.10163	1.90336	2.03575	2.00718	2.05734	1.95777	1.97822	2.02671	1.82268
1810059C17Rik	0.00305351	0.00936685	0	0	0	0.00320901	0.00315067	0.00412588	0	0	0.00343142	0	0	0.00714585	0.0105022	0.00407734	0	0	0	0	0	0	0	0.00924196	0	0	0	0	0	0.017773	0.0119451	0	0	0	0.00234965	0.00577623	0.00633011	0.00509667	0	0	0	0	0	0.0110023	0.0115525	0.0141459	0	0	0.0066014
1810059H22Rik	0.0152676	0.0749348	0.0165035	0.0231049	0.0296607	0.0307583	0.018904	0.00412588	0.039149	0	0.0274514	0	0.0157533	0.0500209	0.0345784	0.00815467	0.0420934	0	0.0404757	0.013161	0.0325623	0.0192541	0.0188611	0.00924196	0.017548	0	0	0	0	0	0.0138629	0.0291851	0.0407734	0.0178877	0.0289522	0.0462098	0.0284855	0	0.142497	0.173287	0.0140503	0.00900191	0.0318578	0.0220047	0.0231049	0.0212188	0.00587413	0.0231049	0.0803386
1810062G17Rik	0.00305351	0	0	0	0	0.00320901	0.00315067	0	0.00912036	0.0074532	0	0.0203867	0	0	0	0	0	0	0	0	0	0	0	0	0.017548	0	0.00815467	0	0	0	0	0	0	0.00447192	0	0	0.00316506	0.0101933	0	0	0	0	0.0088865	0	0	0	0.0117483	0	0
1810062O18Rik	0.012214	0.00936685	0	0	0.00686284	0.0128361	0.00945201	0.00412588	0.0182407	0.0223596	0.0102943	0	0.0157533	0	0.00525112	0.0186944	0.0137711	0	0.0282569	0	0	0	0.00471529	0.0184839	0	0.007617	0	0.00770164	0	0	0.00462098	0.00729629	0.0407734	0.00447192	0.00234965	0	0	0.023368	0	0	0.0140503	0	0.0088865	0	0.0115525	0.0536479	0.0176224	0.0231049	0.0066014
1810063I02Rik	0.012214	0.00936685	0.0495105	0	0.0686284	0.0320901	0.0653918	0.0206294	0.0528295	0.0223596	0.03289	0	0.0315067	0.0571668	0.0210045	0.0285414	0.0275423	0.0213276	0.0151784	0.00438701	0.0226026	0	0.0141459	0.0184839	0.026322	0.038085	0.0163093	0.00770164	0.0281006	0.0992616	0.0323469	0.00729629	0.0407734	0.0313034	0.0375944	0.0288811	0.0588224	0.0314461	0.154033	0.274653	0.0281006	0.0270057	0.0266595	0.0220047	0.06452	0.0282917	0.0176224	0.0231049	0.033007
2010001A14Rik	0.0280005	0.0374674	0.0165035	0.0462098	0.0657801	0.0352992	0.0491031	0.0371329	0.0684027	0.0341726	0.0583342	0.0815467	0.0157533	0.0327634	0.0420089	0.036696	0.0275423	0.0319914	0.0354163	0.0350961	0.0496125	0.00962704	0.0734876	0.0739357	0.0665506	0.060936	0.0407734	0.00770164	0.0374674	0.088865	0.065479	0.0802591	0.0407734	0.0134158	0.046993	0.0693147	0.0443108	0.0662567	0.0770164	0	0.0448905	0.0450096	0.035546	0.0220047	0.0231049	0.117304	0.120919	0.0462098	0.109484
2010001K21Rik	0	0	0	0	0	0	0.00315067	0	0.00722771	0	0	0	0	0	0	0	0	0	0	0	0	0.00962704	0	0	0	0	0.0163093	0	0	0	0	0	0	0	0.00234965	0	0	0.00509667	0	0	0	0.00900191	0	0	0	0	0	0	0
2010013B24Rik	0	0	0	0	0	0	0	0	0	0	0.00686284	0	0	0	0	0	0	0	0	0	0	0	0	0	0.00877401	0	0	0	0	0	0	0	0	0	0	0	0	0	0	0	0	0	0	0	0	0	0	0	0
2010016I18Rik	0.00305351	0	0	0	0	0	0	0	0	0	0	0	0	0	0	0.00407734	0	0	0	0.00438701	0	0	0	0	0.00877401	0	0	0	0	0	0.00462098	0	0	0	0	0	0	0	0	0	0	0	0	0	0	0	0.00587413	0	0
2010106G04Rik	0.0109467	0	0	0	0.00686284	0.00641803	0.00315067	0	0.00456018	0	0.00686284	0.0203867	0	0	0.0105022	0.00407734	0.00459038	0.0106638	0.00505947	0	0	0.00962704	0.00943057	0	0	0	0	0	0.00936685	0.017773	0.00462098	0.00729629	0	0	0.0046993	0	0	0	0	0	0	0	0	0	0	0.0253562	0.0210585	0	0.0219294
2010109A12Rik	0.0152676	0.0468343	0.0165035	0.0462098	0.0137257	0.0352992	0.028356	0.0247553	0.0254684	0.0521724	0.0260272	0.06116	0.0315067	0.0214375	0.0105022	0.0227718	0.0137711	0	0.0101189	0.013161	0.0226026	0.0192541	0.0141459	0.0277259	0.00877401	0.007617	0.024464	0.0231049	0.0374674	0.017773	0.0119451	0.00729629	0.0407734	0.0313034	0.0117483	0.0231049	0.0284855	0.023368	0.115525	0	0.0214733	0.0270057	0.035546	0.0110023	0.0346574	0.0141459	0.0151844	0	0.0198042
2010110E17Rik	0.00610702	0	0.0165035	0	0	0.00962704	0.00315067	0.0123776	0.00456018	0.0074532	0.0171571	0.0203867	0	0	0.00525112	0.00815467	0.00459038	0	0	0.00877401	0.00753421	0	0	0	0	0	0	0.00770164	0	0	0.0184839	0.00729629	0	0.00894383	0.00234965	0	0.00316506	0.00509667	0.0385082	0.173287	0.00468343	0	0.0088865	0	0	0.00707293	0.0234965	0	0.0066014
2010110K18Rik	0.0376252	0.00936685	0.0165035	0.0924196	0.0549027	0.0609713	0.066164	0.0536364	0.0364814	0.0416258	0.0617656	0	0.0564752	0.0493556	0.0450806	0.0716998	0.0577697	0.0488931	0.0151784	0.0376623	0.0678079	0.0537667	0.0432388	0.0646937	0.0526441	0.083787	0.0536982	0.0308065	0.0281006	0.0459426	0.0462098	0.051074	0.12232	0.0447192	0.0493427	0.0462098	0.0240068	0.0560634	0.192541	0	0.0702514	0.0450096	0.0851768	0.0770164	0.0231049	0.0253562	0.0563033	0.0693147	0.0594126
2010204K13Rik	1.16189	1.22806	1.22027	0.76386	1.03475	1.08886	1.12047	1.23566	1.17495	0.972377	1.10535	0.765535	1.24764	1.30215	1.21726	1.13045	1.11218	0.827143	1.36189	1.12418	1.16572	1.48964	1.36887	1.31754	1.1037	1.03869	1.06833	0.584632	1.22518	0.861875	1.1383	1.21459	1.13933	1.19657	1.1891	1.25067	1.24317	0.87648	1.08641	0.173287	0.950656	1.36049	1.21358	1.15488	1.17505	0.97	1.12916	1.18991	1.12895
2010300C02Rik	0.0323213	0.0187337	0.0165035	0.0462098	0.0629318	0.0596394	0.0252054	0.0371329	0.039149	0.0447192	0.0506302	0.12232	0	0.0428751	0.0157533	0.0570827	0.0183615	0.0319914	0.0535543	0.013161	0.0301368	0.00962704	0.00471529	0.0184839	0.026322	0.173324	0.12709	0.00770164	0	0.035546	0.00462098	0.0188606	0	0.0268315	0.0211469	0.0231049	0.0240068	0.0131747	0.0770164	0	0	0.0180038	0.0407443	0.0504453	0	0.0648582	0.120919	0.0231049	0.066014
2010308F09Rik	0.00610702	0.00936685	0	0	0.00686284	0.00829518	0.00630134	0.00412588	0.00722771	0.0074532	0	0	0	0	0	0.00815467	0	0	0	0.00438701	0.0150684	0	0	0.00924196	0	0	0.00815467	0.0154033	0	0	0.00462098	0	0	0.00447192	0	0.00577623	0.00633011	0	0	0	0	0	0	0.0110023	0.0231049	0	0	0	0.0066014
2010309G21Rik	0.00305351	0	0	0	0	0	0.00315067	0.00412588	0	0	0	0	0	0.00714585	0.00525112	0	0	0	0	0	0	0	0	0	0.00877401	0	0	0	0	0	0	0	0	0	0	0	0	0	0	0	0	0	0	0	0.0115525	0	0	0	0
2010310C07Rik	0	0	0	0	0	0	0	0	0	0	0	0	0.0157533	0	0	0	0	0	0	0.00438701	0	0	0	0	0	0	0	0	0.00936685	0	0.00462098	0	0	0	0.00234965	0	0	0	0	0	0	0	0	0	0	0	0	0	0
2010315B03Rik	0.0244281	0.0374674	0.033007	0.0231049	0.0205885	0.0449262	0.028356	0.0123776	0.0410416	0.037266	0.0274514	0.0407734	0.0315067	0.0256176	0.0525112	0.0577756	0.0669505	0.0382293	0.0434353	0.026322	0.0226026	0.0481352	0.0593417	0.0646937	0.026322	0.0653917	0.0326187	0.0122068	0.0710472	0.035546	0.0184839	0.0364814	0	0.0339193	0.0211469	0.0346574	0.0221554	0.03058	0.0385082	0	0.0374674	0.0630134	0.017773	0.0770164	0.0115525	0.0424376	0.0176224	0.0231049	0.0594126
2010320M18Rik	0.291595	0.437242	0.335679	0.317805	0.377591	0.445638	0.464821	0.345502	0.485793	0.265794	0.321522	0.426587	0.283202	0.367544	0.363717	0.362583	0.361522	0.375864	0.483626	0.398895	0.287014	0.319328	0.400013	0.406661	0.255937	0.236849	0.354195	0.346586	0.352236	0.537894	0.311614	0.364826	0.536982	0.407456	0.392845	0.324563	0.326068	0.331383	0.436677	0.51986	0.292768	0.306918	0.417012	0.353117	0.386913	0.416909	0.324085	0.323469	0.295337
2200002D01Rik	0.532745	0.324459	0.338187	0.344836	0.36889	0.789929	0.291551	0.365888	0.448462	0.626155	0.774017	0.550108	0.336174	0.474354	0.314587	0.710643	0.358064	0.562585	0.436756	0.489058	0.276217	2.09865	1.12957	1.33521	0.379448	1.10975	0.927583	0.223222	0.342153	0.404423	0.338124	0.336881	0.390811	0.292881	0.379673	0.420258	0.41727	2.07808	0.30448	0	0.293319	0.375727	0.408592	0.493451	0.311048	1.07403	1.04998	0.488604	0.316371
2200002J24Rik	0.00305351	0	0.0165035	0.0231049	0	0.00962704	0	0	0	0	0.00543867	0	0	0.00714585	0.00525112	0.00407734	0	0	0	0	0	0	0.00471529	0	0	0.007617	0.0163093	0	0	0.0459426	0	0	0	0	0	0	0	0	0	0	0	0	0	0	0.0115525	0	0	0	0.0198042
2210011C24Rik	0.178665	0.103035	0.193997	0.12904	0.175586	0.301904	0.253129	0.14721	0.113662	0.126704	0.134992	0.113859	0.14178	0.220984	0.21352	0.06116	0.141177	0.22495	0.105009	0.268769	0.156372	0.174923	0.246721	0.16252	0.0665506	0.0958597	0.276033	0.614753	0.110106	0.554945	0.206381	0.174562	0.12232	0.110702	0.183895	0.17525	0.122661	0.151651	0.308065	0.173287	0.211198	0.0952849	0.115525	0.184343	0.16566	0.160944	0.254142	0.12904	0.100143
2210016F16Rik	0.471713	0.696025	0.532184	0.744267	0.51201	0.528408	0.572769	0.52905	0.615498	0.503615	0.557461	0.556906	0.472344	0.489572	0.693311	0.38736	0.608563	0.57562	0.42235	0.282596	0.477228	0.604681	0.626618	0.639991	0.558741	0.746779	0.720889	0.568199	0.466062	0.312538	0.569514	0.654913	0.632386	0.570315	0.561575	0.637273	0.612846	0.641865	0.452659	0.51986	0.584303	0.640548	0.624945	0.634611	0.618188	0.379014	0.527702	0.583324	0.598009
2210016L21Rik	1.11246	1.01492	1.08352	0.978718	0.999018	1.10608	1.12471	1.0502	1.03621	0.903457	0.982466	0.89312	0.995893	0.973531	1.03997	0.887835	1.00466	0.887154	1.00486	0.979825	1.21161	1.02841	0.9877	0.960079	0.820906	1.05014	0.872499	1.40365	0.917524	1.24647	0.995409	1.02874	1.01461	1.08941	1.10438	0.97408	1.08991	1.70184	0.804901	1.5486	1.0145	0.977004	0.937938	1.08248	1.00777	0.786588	0.94572	1.19882	0.948687
2210039B01Rik	0.00916054	0	0	0	0.00686284	0.00641803	0	0.00825175	0	0	0.00686284	0	0	0.00714585	0	0	0	0	0	0.00438701	0	0	0	0	0	0	0.00815467	0	0	0	0	0.00729629	0	0.00447192	0	0	0.00316506	0	0	0	0.00468343	0	0	0	0	0	0	0	0
2210404E10Rik	0	0	0	0	0	0	0.00945201	0	0	0	0	0	0	0	0.00525112	0	0	0	0	0	0	0	0.00471529	0	0	0	0	0.00770164	0	0	0	0	0	0	0.00234965	0	0	0	0	0	0	0	0	0	0.0231049	0	0	0	0
2210406O10Rik	0.0152676	0.00936685	0.0495105	0	0.00686284	0.0128361	0.00945201	0.00412588	0.00456018	0.0341726	0.0260272	0.0203867	0.0630134	0.0643126	0.0157533	0.00815467	0.00918076	0.0319914	0.0151784	0.013161	0.0452053	0.00962704	0.00943057	0.0184839	0.026322	0.015234	0.0163093	0.0154033	0.00936685	0.017773	0.00924196	0.00729629	0	0.00894383	0.0117483	0.0173287	0.0158253	0.00509667	0	0	0.0234171	0.00900191	0	0.0614476	0.0298627	0.0353647	0.0915481	0	0.0066014
2210408F21Rik	0.00305351	0	0	0	0	0.00508617	0.00315067	0.00825175	0.00456018	0.0074532	0	0.0203867	0	0	0.00525112	0	0	0	0.00505947	0	0	0	0.0141459	0.0184839	0.017548	0.007617	0	0	0	0	0.016566	0	0	0.00894383	0.00234965	0	0	0	0	0	0	0.00900191	0	0	0	0	0.0117483	0.0462098	0.0132028
2210408I21Rik	0.137178	0.256088	0.207696	0.138629	0.145286	0.112316	0.123175	0.183642	0.197295	0.126704	0.154739	0.134246	0.135242	0.17986	0.177251	0.126305	0.154948	0.161769	0.136606	0.0903064	0.124955	0.115525	0.164681	0.125552	0.0980051	0.196175	0.180788	0.104626	0.117882	0.191147	0.160171	0.141109	0.251569	0.151709	0.138453	0.136232	0.161718	0.184829	0.115525	0.51986	0.185041	0.16883	0.10295	0.182473	0.0991774	0.15921	0.153726	0.17525	0.139751
2210417A02Rik	0	0	0	0	0.00686284	0.00641803	0.00315067	0.0123776	0	0	0.00686284	0.0203867	0.0315067	0	0.00525112	0.00815467	0	0.0106638	0.00505947	0.00438701	0.00753421	0.00962704	0	0.00924196	0	0.007617	0.00815467	0	0	0.017773	0.00462098	0	0	0.00894383	0.0046993	0	0.00949517	0	0	0	0.00468343	0	0.017773	0	0.0115525	0.00707293	0	0.0231049	0
2210418O10Rik	0.00305351	0	0.0165035	0	0	0	0	0	0	0	0	0	0	0	0.00525112	0	0	0	0	0	0	0	0	0	0	0	0	0	0	0	0.00462098	0	0	0	0.00234965	0	0	0	0	0	0	0	0.0088865	0	0	0	0	0	0
2300002M23Rik	0	0	0	0	0	0	0	0.00412588	0	0	0	0	0	0	0	0	0	0	0	0	0	0	0	0	0	0	0	0	0	0	0	0	0	0	0	0	0.00316506	0	0	0.173287	0	0	0.0088865	0.0110023	0	0	0	0	0
2300009A05Rik	0.139484	0.19052	0.191192	0.17525	0.219095	0.239407	0.133399	0.137556	0.161931	0.234849	0.197923	0.32119	0.0945201	0.191186	0.204793	0.177404	0.138491	0.274645	0.201998	0.22854	0.120547	0.272829	0.210678	0.171762	0.178462	0.219026	0.237258	0.132237	0.19052	0.389351	0.216053	0.15749	0.12232	0.148333	0.156275	0.108332	0.171213	0.221755	0.154033	0.173287	0.172139	0.201101	0.214786	0.181646	0.140592	0.318293	0.226106	0.0924196	0.228935
2310001H17Rik	0.00305351	0.0187337	0	0	0.00686284	0	0	0.00653936	0.00456018	0	0	0	0	0	0.00525112	0.00407734	0	0.0106638	0	0.00438701	0	0.00962704	0	0	0.00877401	0	0	0	0.00936685	0	0	0.00729629	0	0.00447192	0.0046993	0.00577623	0	0.00509667	0.0385082	0	0	0	0	0	0.0115525	0	0.00587413	0	0.0066014
2310001K24Rik	0.00305351	0	0	0	0.00686284	0	0	0	0	0	0	0	0	0	0	0	0	0	0	0	0	0.00962704	0	0	0	0	0	0	0	0	0	0	0	0	0	0.00577623	0	0	0	0	0	0	0	0	0	0	0.0117483	0	0
2310002F09Rik	0.0183211	0	0.0165035	0	0.0411771	0.0403853	0.0175964	0.0412588	0.00912036	0.0192662	0.0157329	0.0203867	0.04726	0.0285834	0.0315067	0.0614732	0.0413134	0.0319914	0.0505947	0.0350961	0.0150684	0.0192541	0.0235764	0.0184839	0.0701921	0.022851	0	0.0231049	0.0843017	0.071092	0.0138629	0	0.0407734	0.0268315	0.0272206	0.0288811	0.0158253	0.122712	0.0385082	0	0.032784	0.0180038	0.0088865	0.0284406	0.0115525	0.0141459	0	0.0231049	0.0198042
2310003L06Rik	0.00916054	0.0187337	0.0165035	0	0.0411771	0.0160451	0.0315067	0.0371329	0.0782979	0	0	0	0.0315067	0.0428751	0.0262556	0.00407734	0.048589	0	0.0151784	0.00438701	0.00753421	0.00962704	0.00943057	0.00924196	0.026322	0.007617	0.00815467	0.00770164	0.00936685	0	0.00462098	0.0291851	0.0407734	0.0454791	0.0342696	0.0115525	0.0303369	0	0	0	0.0234171	0.0270057	0.0266595	0.066014	0.0298627	0.00707293	0	0	0
2310008N11Rik	0	0	0	0	0.0137257	0.00320901	0	0	0.00456018	0.0074532	0	0	0	0	0.00525112	0	0	0	0	0	0	0	0	0.00924196	0	0	0	0	0	0	0	0	0	0	0	0	0.00316506	0.0131747	0	0	0	0.00900191	0	0.0220047	0	0	0.00587413	0	0.0066014
2310009A05Rik	0.804672	0.804004	0.817682	0.558481	0.88974	0.855445	0.83987	0.757799	1.0592	0.741082	0.698317	0.689716	0.83884	0.77556	0.831438	0.739493	0.859198	0.683146	0.871314	0.739441	0.671148	0.827061	0.840686	0.749883	0.757952	0.919118	0.804581	0.685032	0.809423	0.79337	0.811234	0.805754	0.829324	0.817888	0.80137	0.842631	0.79203	0.835307	0.619779	0.794513	0.860705	0.81138	0.842288	0.84729	0.8375	0.775018	0.806553	0.895466	0.899659
2310009B15Rik	0.527126	0.56521	0.651781	0.579812	0.536086	0.635789	0.583378	0.704399	0.598614	0.541844	0.489836	0.620095	0.606683	0.607548	0.562873	0.870451	0.552938	0.628571	0.531732	0.560046	0.565485	0.700618	0.691422	0.694748	0.465037	0.804863	0.577769	0.699001	0.497331	0.629779	0.510656	0.582618	0.580888	0.683956	0.591025	0.527515	0.595594	0.577681	0.558745	0.346574	0.62213	0.505447	0.636996	0.592025	0.635423	0.684586	0.724928	0.596839	0.574343
2310010J17Rik	0.0786429	0.103035	0.0921715	0.0366204	0.114986	0.121156	0.152303	0.118255	0.138355	0.0788918	0.128129	0.105398	0.103735	0.0786043	0.0713362	0.121321	0.0734461	0.0639828	0.18596	0.106034	0.0916908	0.0481352	0.130071	0.145606	0.0665506	0.060936	0.0652374	0.0738199	0.136615	0.017773	0.107068	0.116741	0	0.0939103	0.103208	0.108332	0.0941759	0.0883755	0.154033	0	0.0523135	0.209265	0.10295	0.111893	0.06452	0.103158	0.146412	0.105935	0.118825
2310011J03Rik	0.716309	0.769704	0.793463	0.532663	0.633985	0.675147	0.691855	0.635102	0.668483	0.84578	0.753602	0.791317	0.737756	0.762843	0.780128	0.599322	0.750099	0.613031	0.523812	0.652439	0.698035	0.689183	0.718443	0.700864	0.767841	0.741775	0.773348	0.813355	0.59879	0.516782	0.644597	0.722585	0.831725	0.684423	0.738251	0.745718	0.723764	0.783057	0.510108	1.24245	0.738322	0.596362	0.661174	0.613649	0.782566	0.727773	0.744201	0.762914	0.727547
2310014F06Rik	0	0.00936685	0	0	0	0	0.00315067	0.00412588	0	0.0074532	0.00343142	0	0	0	0.00525112	0	0.00459038	0	0	0	0.00753421	0	0	0.00924196	0	0	0	0.00770164	0.0187337	0	0	0	0	0.00447192	0	0	0	0	0	0	0.00936685	0.00900191	0	0	0	0.00707293	0.0117483	0	0
2310015A10Rik	0.080429	0.0749348	0.125178	0.0597253	0.0480399	0.0339673	0.0850681	0.0625892	0.0737377	0.0223596	0.0583342	0.0815467	0.110273	0.0756385	0.0787667	0.024464	0.0761313	0.0853104	0.018138	0.026322	0.0496125	0.0633937	0.0687723	0.0646937	0.105288	0.045702	0.0570827	0.0616131	0.0468343	0.0992616	0.0673968	0.0437777	0	0.051807	0.0638399	0.0924196	0.107855	0.0437547	0	0.173287	0.0616804	0.0502753	0.108148	0.0770164	0.0760725	0.0536479	0.139539	0.0231049	0.0632742
2310015A16Rik	0	0.00936685	0	0	0	0.00320901	0.00945201	0	0	0	0.00343142	0	0	0	0.0105022	0.0146171	0.00918076	0	0.00505947	0	0.00753421	0	0.00471529	0	0	0	0	0	0	0	0	0.00729629	0	0.00447192	0.00234965	0	0	0	0	0	0	0	0	0	0	0.00707293	0	0	0
2310015D24Rik	0	0	0	0	0	0	0	0	0	0	0	0	0.0157533	0	0	0	0	0	0	0	0	0.00962704	0	0	0	0	0	0	0	0	0	0	0	0.00447192	0	0	0	0	0	0	0	0	0	0	0	0	0	0	0
2310015K22Rik	0	0	0	0	0	0	0	0	0	0	0	0	0	0	0.00525112	0	0	0	0	0	0	0	0	0	0	0	0	0	0	0	0	0	0	0	0	0	0	0	0	0	0.00468343	0	0	0	0	0	0	0	0
2310022A10Rik	0.447654	0.48726	0.526871	0.338759	0.50683	0.430437	0.512086	0.488269	0.497156	0.358459	0.416884	0.475822	0.469949	0.480663	0.410187	0.356886	0.540719	0.354537	0.423474	0.43184	0.448938	1.02079	0.676998	0.634585	0.546985	0.293329	0.364348	0.357622	0.377153	0.410144	0.52541	0.446456	0.52006	0.464838	0.498364	0.505486	0.511188	0.879422	0.381496	0.748933	0.455111	0.429208	0.507228	0.482001	0.425497	0.334843	0.482696	0.510497	0.417139
2310022B05Rik	0.218361	0.261568	0.257206	0.142556	0.183615	0.262846	0.226025	0.255184	0.291941	0.191956	0.22136	0.300803	0.182502	0.241207	0.206183	0.407127	0.235669	0.240842	0.230255	0.259256	0.204704	0.243948	0.243685	0.239596	0.194519	0.23426	0.328345	0.281639	0.366195	0.339052	0.252244	0.183647	0.24464	0.206132	0.255939	0.1892	0.236365	0.166558	0.0385082	0.173287	0.182302	0.219105	0.28068	0.228352	0.191597	0.173229	0.186532	0.0924196	0.221211
2310026L22Rik	0	0	0	0	0	0	0	0	0	0.0074532	0	0	0	0	0	0.00407734	0	0	0	0	0	0	0	0	0	0	0	0	0.00936685	0	0	0	0	0	0	0	0	0.0509667	0	0	0	0	0	0	0	0	0	0	0
2310030A07Rik	0	0	0	0	0.00686284	0	0.00630134	0	0.00456018	0	0.00343142	0	0	0	0	0	0	0	0	0	0.00753421	0	0	0	0	0	0	0	0	0	0.00924196	0	0	0	0.0046993	0.0115525	0	0	0	0	0.00468343	0	0	0	0.0115525	0	0.0117483	0	0
2310030G06Rik	0.210702	0.272526	0.165035	0.0693147	0.279055	0.175956	0.226081	0.261022	0.280846	0.123611	0.130977	0.186944	0.175964	0.257927	0.250372	0.0530054	0.273952	0.3652	0.176701	0.134922	0.132489	0.357113	0.304907	0.387468	0.1447	0.235554	0.219563	0.148948	0.358419	0.333331	0.184492	0.154462	0.186944	0.162092	0.277485	0.257099	0.244309	0.293025	0.292083	0.173287	0.212346	0.280589	0.248154	0.27797	0.23977	0.2246	0.169908	0.22146	0.17114
2310033P09Rik	0.761704	0.832824	0.945771	0.780363	0.666122	0.770899	0.903522	0.788245	0.705852	0.734943	0.828281	0.739316	0.926464	0.806572	0.910247	0.871812	0.866984	0.689193	0.878309	0.780912	0.767776	0.811759	0.845896	0.893709	0.767844	0.776662	0.802679	0.789079	0.814261	0.722711	0.941844	0.812489	1.00462	0.832583	0.928985	0.859725	0.927178	0.700844	0.834156	1.14109	0.841252	0.875128	0.926739	0.804558	0.75399	0.577901	0.806897	0.962481	0.831475
2310034G01Rik	0.0437869	0.00936685	0	0.0231049	0.0411771	0.0385082	0.04726	0.0412588	0.050162	0.0447192	0.0583342	0.0730855	0.0315067	0.0214375	0.0525112	0.0163093	0.0394082	0.0106638	0.0354163	0.0438701	0.0150684	0.0537667	0.0424376	0.0462098	0.0350961	0.015234	0.024464	0.0385082	0.0187337	0.071092	0.0277259	0.0437777	0.0815467	0.0760226	0.0379937	0.0380362	0.0253204	0.0407734	0.115525	0	0.032784	0.0450096	0.0444325	0.033007	0.0876249	0.0577853	0.0504292	0.0462098	0.066014
2310039H08Rik	0.291865	0.323248	0.392039	0.188765	0.318673	0.328478	0.358414	0.233152	0.393651	0.169597	0.237878	0.333115	0.263946	0.313343	0.277519	0.165172	0.287724	0.316307	0.262241	0.258174	0.241673	0.219062	0.22678	0.230354	0.26107	0.266022	0.247412	0.402713	0.263864	0.223673	0.208382	0.304656	0.438513	0.29929	0.339997	0.361514	0.301818	0.207331	0.529676	0.621227	0.262716	0.310654	0.223673	0.324676	0.283148	0.206317	0.185092	0.198355	0.228935
2310039L15Rik	0.0188399	0.0374674	0.0165035	0	0.0137257	0.00962704	0.0220547	0.0206294	0.00912036	0	0.0171571	0.0407734	0.0157533	0.0214375	0.0262556	0.024464	0.0183615	0	0.00505947	0.00438701	0.00753421	0.00962704	0.0141459	0.00924196	0.026322	0.015234	0.0163093	0	0	0.017773	0.00462098	0	0.0407734	0.0134158	0.0140979	0.0115525	0.0126602	0.00509667	0	0	0.00936685	0.0360076	0.0229713	0	0	0.00707293	0	0	0.0066014
2310040G24Rik	0.0262143	0.0562011	0.099021	0	0.0549027	0.0371763	0.0535614	0.0725534	0.0573897	0.0298128	0.0348973	0	0.04726	0.0714585	0.0525112	0.0309264	0.0688557	0.0915483	0.0434353	0.0307091	0.14443	0.0192541	0.101779	0.0554518	0.0526441	0.038085	0.0326187	0	0.0374674	0.088865	0.0812598	0.106416	0	0.0607508	0.0671647	0.0404336	0.090473	0.0254834	0	0.44794	0.0823579	0.122291	0.0585173	0.0550117	0.0529676	0.0424376	0.0176224	0.0462098	0.0594126
2310043L19Rik	0	0	0	0	0	0	0	0	0	0	0	0	0	0	0	0	0	0	0	0	0	0	0.00471529	0	0	0	0	0	0	0	0	0	0	0	0	0	0	0	0	0	0	0	0	0	0	0.00707293	0	0	0
2310043M15Rik	0.0984658	0.113994	0.170644	0	0.256102	0.0518895	0.0635488	0.153048	0.285929	0.0074532	0.0534786	0.0203867	0.119489	0.107188	0.179035	0.0163093	0.122815	0.0595569	0.0252973	0.026322	0.0948177	0.00962704	0.0479541	0.0901543	0.120686	0.0546133	0.0326187	0.0531944	0.136615	0	0.0920722	0.150028	0.146171	0.10547	0.155699	0.189643	0.155093	0.01529	0.154033	0.346574	0.118677	0.0630134	0.123584	0.099021	0.135798	0.00707293	0.0234965	0.192277	0.0066014
2310047D07Rik	0	0	0	0	0	0	0	0	0	0	0.00343142	0	0	0	0	0	0	0.0106638	0	0	0	0	0	0	0	0.007617	0	0	0	0	0.00924196	0	0	0	0.00234965	0	0	0	0	0	0	0	0	0	0	0	0	0	0
2310057M21Rik	0.361132	0.413748	0.480165	0.308216	0.387302	0.450667	0.483787	0.427075	0.601206	0.458457	0.498739	0.543911	0.426833	0.373475	0.43368	0.561693	0.422067	0.3173	0.479897	0.518355	0.384257	0.488808	0.425277	0.419905	0.332753	0.455875	0.557929	0.354426	0.442721	0.38665	0.423227	0.37955	0.496209	0.43819	0.43275	0.35486	0.410748	0.763521	0.320462	0.44794	0.359843	0.4299	0.550309	0.4347	0.36294	0.481353	0.485134	0.554555	0.454008
2310058D17Rik	0.0201073	0.0562011	0	0.0231049	0.0453957	0.0555863	0.030199	0.0271687	0.0372563	0.0149064	0.0554079	0	0	0.0142917	0.0293273	0.0186944	0.0604549	0.0382293	0.0101189	0.017548	0.0496125	0.0441396	0.065575	0.00924196	0.0350961	0.007617	0.0473571	0.0154033	0.0374674	0.017773	0.030429	0.00729629	0	0.0357753	0.0140979	0.0398958	0.0158253	0.0356767	0.0995422	0	0.040207	0.0142677	0.0407443	0.033007	0	0.164794	0.0504292	0	0.0264056
2310061I04Rik	0.743991	0.758041	0.77011	0.524959	0.610299	0.745131	0.773578	0.732101	0.644103	0.671957	0.786536	0.705471	0.719351	0.722445	0.671071	0.616018	0.72696	0.649465	0.612907	0.738645	0.760722	0.762881	0.750925	0.793828	0.748762	0.653942	0.568855	0.412579	0.535685	0.781637	0.864797	0.592811	0.866301	0.673331	0.780459	0.73328	0.733373	0.533151	0.911862	0.621227	0.659247	0.700502	0.777324	0.64209	0.7027	0.55118	0.602079	0.821811	0.623422
2310067P03Rik	0	0	0	0	0	0	0	0	0	0.0074532	0.00543867	0	0	0	0	0.00407734	0.00459038	0	0	0	0	0.00962704	0	0	0	0	0	0	0	0	0	0	0	0	0.00234965	0	0.00316506	0	0.061034	0	0	0	0	0.0110023	0	0	0	0	0
2310068J16Rik	0.0987501	0.155349	0.158185	0.0462098	0.156163	0.139078	0.142614	0.120351	0.169502	0.102518	0.0835203	0.113859	0.14178	0.126874	0.12474	0.124705	0.167939	0.0853104	0.135366	0.0998259	0.0602737	0.136414	0.123399	0.103232	0.0701921	0.060936	0.102626	0.290649	0.0616804	0.188127	0.0747209	0.110684	0.0815467	0.126733	0.117306	0.0669174	0.140876	0.0722194	0.199084	0.346574	0.101887	0.104287	0.182928	0.0944546	0.0760725	0.138523	0.184094	0.138629	0.137011
2310069B03Rik	0	0	0	0	0	0	0.00315067	0	0.0136805	0.0074532	0.00343142	0	0	0	0	0	0.00459038	0.0106638	0.00505947	0	0	0	0.00471529	0.00924196	0	0.015234	0	0	0.00936685	0	0	0	0	0	0.0046993	0	0	0.0203867	0	0	0	0	0	0	0	0	0	0	0
2310074N15Rik	0.0231608	0.0281006	0.0165035	0.0462098	0.0205885	0.0128361	0.00630134	0.00825175	0.0136805	0.0074532	0.0274514	0.0203867	0	0.0142917	0.0157533	0.00407734	0.0137711	0	0.0101189	0.00877401	0	0.0192541	0.0141459	0.0184839	0.00877401	0.015234	0	0	0.00936685	0.035546	0.0138629	0.0145926	0	0.0134158	0.0164476	0.00577623	0.0208418	0.00509667	0.0385082	0	0.0187337	0.0180038	0.0266595	0	0.0231049	0.0141459	0	0	0.0066014
2400006E01Rik	0.187307	0.198296	0.246016	0.207944	0.244864	0.224148	0.302768	0.279939	0.217428	0.098158	0.21055	0.101933	0.244331	0.281794	0.165856	0.228717	0.222251	0.238228	0.199427	0.279363	0.229867	0.165296	0.327319	0.245002	0.231106	0.211409	0.130475	0.109132	0.288077	0.322934	0.227213	0.184887	0.427788	0.256843	0.25572	0.324016	0.282827	0.17541	0.115525	0.44794	0.243982	0.321185	0.236247	0.245791	0.105935	0.218729	0.192406	0.281185	0.272405
2410002F23Rik	0.826124	0.952636	1.00523	0.741169	0.818014	0.929857	0.941682	0.96387	1.13521	0.749194	0.791696	0.864272	0.982657	0.896795	0.887646	0.92523	0.908941	0.857882	1.13633	0.996093	1.03427	0.799769	0.852359	0.893937	0.991838	0.80215	0.784277	1.13809	0.724021	0.965203	0.881174	0.831145	1.04632	0.938528	0.938703	0.93024	0.92921	0.755691	0.889336	1.1077	0.789349	0.948264	0.933928	0.901601	0.826022	0.773069	0.638668	0.987893	1.00158
2410003I16Rik	0	0.00936685	0	0	0	0	0	0	0.00456018	0	0	0	0	0	0	0	0	0	0	0	0	0	0.00471529	0	0	0	0	0	0.00936685	0	0	0.00729629	0	0	0	0	0.00316506	0	0	0	0.00468343	0.00900191	0	0	0	0	0	0	0
2410003L11Rik	0.645784	0.640864	0.778496	0.539265	0.697195	0.784779	0.823253	0.724429	0.651785	0.864404	0.754695	0.770434	0.745504	0.681191	0.784365	0.69063	0.718387	0.723556	0.705316	0.67623	0.806556	0.784557	0.851328	0.825389	0.658094	0.870267	0.743796	0.586799	0.756069	0.761277	0.729965	0.654782	0.750909	0.789719	0.822141	0.633554	0.770785	0.682421	0.52609	0.794513	0.617363	0.701444	0.670887	0.813184	0.607711	0.834781	0.681668	0.695336	0.882626
2410004B18Rik	1.01359	0.867171	0.920178	0.922083	0.859113	0.969345	0.978789	1.00851	0.876323	1.0052	0.973073	1.03656	0.842162	0.837734	1.05112	0.930409	1.0053	1.07424	0.966356	0.89433	0.93464	0.889401	0.954909	0.968748	0.858939	1.00977	1.0476	1.02556	1.02439	0.827694	0.984051	0.938553	0.69701	0.976851	0.968619	0.946822	0.95768	1.04101	0.91344	1.06917	0.953111	0.895295	0.852946	0.986677	0.960846	0.974173	0.846922	0.919931	1.05871
2410004I01Rik	0.0506424	0.0749348	0	0	0.0960798	0.0724755	0.0409587	0.0206294	0.0364814	0.0149064	0.0308828	0.0203867	0.0157533	0.0285834	0.04726	0.00815467	0.0210467	0.053319	0.0202379	0.00695324	0.0301368	0.0192541	0.0424376	0.0369678	0.0350961	0.022851	0.00815467	0.179755	0.136615	0	0.0231049	0.0291851	0.12232	0.0383912	0.0328951	0.0288811	0.0348156	0.0437547	0	0	0.0562011	0.0720153	0.035546	0.033007	0.0183102	0.125579	0.215903	0.0462098	0.0132028
2410004P03Rik	0.00916054	0	0.0165035	0	0.0480399	0.0160451	0.0220547	0.0123776	0.00456018	0.0223596	0.0137257	0	0.0315067	0	0.0105022	0.024464	0.00918076	0.0106638	0.0202379	0.00877401	0.00753421	0.0288811	0.0141459	0	0	0.015234	0.0326187	0	0	0	0.00924196	0	0	0.00894383	0.00939861	0.00577623	0.0113466	0.0101933	0.0385082	0	0.00468343	0.0180038	0	0	0	0.0212188	0.00587413	0	0.0264056
2410006H16Rik	2.4197	2.17524	2.16167	2.46825	2.29668	2.04391	2.18911	2.31287	2.34846	2.30603	2.26109	2.28769	2.15192	2.21855	2.27073	2.15043	2.21329	2.2314	2.28972	2.27782	2.36665	2.283	2.28446	2.3827	2.36687	2.29338	2.46401	2.12185	2.30725	2.08868	2.3061	2.33894	2.28921	2.25614	2.25809	2.22469	2.24998	2.06749	2.4754	2.76085	2.22137	2.34991	2.20612	2.30786	2.56624	2.2517	2.29276	2.20587	2.40708
2410017I17Rik	0.0048397	0	0	0	0	0	0	0	0	0	0.00343142	0	0	0	0	0	0	0	0.00505947	0	0	0	0	0	0.00877401	0	0	0.0308065	0	0	0	0	0	0	0	0	0	0	0	0	0	0	0	0	0	0	0	0	0
2410018L13Rik	0.0755893	0.14987	0.21735	0.0693147	0.106957	0.131328	0.146537	0.132729	0.0984313	0.120518	0.0514713	0.0815467	0.216685	0.161389	0.118596	0.107396	0.0944928	0.134204	0.175841	0.107854	0.113013	0.0673893	0.123399	0.0793419	0.0877401	0.07617	0.12709	0.0539114	0.179562	0.088865	0.104365	0.113712	0.203867	0.0562789	0.122581	0.084246	0.0936381	0.115108	0.115525	0	0.117882	0.192099	0.134808	0.110023	0.0577623	0.127313	0.183096	0.105935	0.105622
2410021H03Rik	0.00916054	0.00936685	0.033007	0.0924196	0.0480399	0.00641803	0.00315067	0.0288811	0.0801906	0.0447192	0.00343142	0.101933	0.0157533	0.0142917	0.0157533	0.00407734	0.0137711	0	0.00505947	0.00877401	0.037671	0.190181	0.0884347	0.0739357	0.0350961	0.030468	0	0.050715	0.0187337	0.053319	0.0423741	0.00729629	0.0407734	0.0428632	0.0211469	0.0346574	0.0126602	0	0	0	0.0308402	0.0232696	0.0088865	0	0.0298627	0.0282917	0	0.0462098	0.0066014
2410022M11Rik	0.142537	0.220045	0.141682	0.138629	0.0657801	0.149796	0.165976	0.115525	0.137237	0.0683452	0.136999	0.0407734	0.238977	0.155457	0.182502	0.13186	0.189338	0.178671	0.170782	0.123582	0.140023	0.166932	0.15525	0.177168	0.141875	0.103477	0.107396	0.282809	0.121769	0.216296	0.132876	0.139869	0.373889	0.136437	0.119256	0.182442	0.149057	0.0912655	0.154033	0.173287	0.141299	0.154562	0.161467	0.105457	0.12904	0.114369	0.189968	0.152145	0.21461
2410080I02Rik	0.120644	0.164716	0.184343	0.0231049	0.153315	0.0601847	0.154146	0.151646	0.142915	0.0298128	0.0657801	0.06116	0.191717	0.111368	0.172892	0.183793	0.166814	0.170621	0.127346	0.116628	0.102352	0.11716	0.145018	0.0939901	0.133101	0.045702	0.0536982	0.050715	0.0936685	0.106638	0.10777	0.184887	0.227718	0.159477	0.193293	0.147785	0.156163	0.0407734	0.154033	0	0.163568	0.127556	0.191147	0.138464	0.140592	0.0919481	0.0646154	0.105935	0.222333
2410124H12Rik	0.0213746	0.0374674	0	0	0.0274514	0.0192541	0.0220547	0.033007	0.0300286	0.0223596	0.0102943	0.0203867	0.0315067	0.0142917	0.0210045	0.00815467	0.0275423	0.0106638	0.0202379	0.017548	0.0150684	0	0.0282917	0.0184839	0.00877401	0.038085	0.048928	0	0.0281006	0.017773	0.00924196	0.0145926	0	0.0223596	0.0211469	0.0173287	0.0158253	0.01529	0.0385082	0	0.0140503	0.0180038	0.0088865	0	0	0.00707293	0	0	0.0198042
2410131K14Rik	0.235185	0.290388	0.269665	0.22146	0.246546	0.314305	0.288914	0.346344	0.353809	0.314313	0.304039	0.394275	0.286237	0.229344	0.295847	0.294341	0.316046	0.297351	0.252122	0.312976	0.263131	0.267198	0.357653	0.274994	0.343018	0.299652	0.34604	0.256771	0.350476	0.260584	0.328965	0.316911	0.0815467	0.257179	0.330993	0.276287	0.32266	0.402737	0.253575	0	0.258032	0.365357	0.317736	0.333809	0.345705	0.194575	0.288284	0.25808	0.316371
2410137M14Rik	0.062108	0.0374674	0.165035	0.0693147	0.127546	0.0615166	0.112652	0.177102	0.0756304	0.0341726	0.0774985	0.0407734	0.119489	0.100042	0.139112	0.00815467	0.151835	0.0319914	0.0303568	0.0288883	0.129362	0.0288811	0.0876334	0.0554518	0.0753246	0.045702	0.0163093	0.0199084	0.0281006	0.035546	0.141688	0.126517	0.20007	0.142765	0.134909	0.148766	0.11448	0.03058	0.115525	0	0.236207	0.0360076	0.0940633	0.0944546	0.0924196	0.0536479	0.0293706	0.161734	0.132535
2410141K09Rik	0.51084	0.650935	0.809296	0.546703	0.700448	0.570498	0.691232	0.739437	0.53773	0.51974	0.502636	0.467361	0.809082	0.73487	0.686421	0.505616	0.668674	0.707838	0.478864	0.400236	0.706136	0.392365	0.584835	0.616645	0.577465	0.559227	0.433743	0.270878	0.462174	0.65432	0.882203	0.685756	0.59781	0.649553	0.687561	0.669335	0.683461	0.360239	0.629218	0.89588	0.743311	0.673335	0.802593	0.799865	0.490224	0.271718	0.343157	0.626021	0.390508
2410152P15Rik	0	0	0	0	0	0	0.00315067	0.00412588	0	0	0	0	0.0157533	0	0	0	0	0	0	0	0	0	0	0	0	0	0	0	0	0	0	0	0	0	0	0	0.00316506	0	0	0	0.00936685	0	0	0	0	0	0	0	0
2500002B13Rik	0.263879	0.284189	0.440013	0.152145	0.353908	0.23862	0.437186	0.335922	0.41318	0.18141	0.29148	0.146171	0.454196	0.364999	0.347569	0.129475	0.36153	0.294161	0.300617	0.218691	0.283173	0.194177	0.375713	0.432107	0.356924	0.31618	0.14817	0.136742	0.270934	0.254862	0.332454	0.371013	0.479286	0.348481	0.435403	0.412868	0.414208	0.163576	0.468642	0.346574	0.459871	0.333924	0.350276	0.344812	0.327395	0.119581	0.14885	0.327395	0.235536
2500004C02Rik	0.0292678	0.065568	0.0495105	0.0231049	0.0520544	0.0564304	0.0315067	0.0395464	0.0364814	0.037266	0.0274514	0.06116	0.04726	0.0285834	0.0188251	0.0407734	0.036723	0.0319914	0.0455352	0.021935	0.00753421	0.0192541	0.0424376	0.0184839	0.0438701	0.015234	0.0407734	0.0231049	0.0523135	0.134808	0.0508308	0.0407495	0.0815467	0.0447192	0.0524488	0.0404336	0.0316506	0.0356767	0.0770164	0.173287	0.0187337	0.0772811	0	0.0440093	0.0346574	0.046575	0.0587413	0.0231049	0.0500714
2510002D24Rik	0.468635	0.579352	0.508831	0.394972	0.539339	0.50468	0.589149	0.556219	0.580022	0.589218	0.565506	0.591247	0.476205	0.512889	0.581913	0.54629	0.537877	0.571195	0.470638	0.438385	0.541207	0.555128	0.511948	0.56287	0.449137	0.537983	0.557316	0.583462	0.66826	0.601291	0.632214	0.474152	0.790952	0.552684	0.576309	0.5387	0.545543	0.680963	0.680813	0.346574	0.470745	0.58021	0.64054	0.458395	0.598333	0.507414	0.596897	0.414151	0.493509
2510009E07Rik	0.00916054	0	0	0.0231049	0.0137257	0.0115042	0.0252054	0	0.0319213	0.0223596	0.0308828	0.0203867	0	0.0142917	0.00525112	0.00407734	0.00459038	0.0106638	0	0.00877401	0.0150684	0.0192541	0.0141459	0.00924196	0.00877401	0.015234	0.0570827	0.0693147	0	0.035546	0.0138629	0	0	0.00894383	0.00939861	0.00577623	0.0126602	0.03058	0.0995422	0	0.00468343	0	0.0088865	0	0	0.0141459	0.0352448	0	0.0396084
2510017J16Rik	0.0445354	0.0468343	0.066014	0.0462098	0.0823541	0.0871887	0.0653918	0.0618881	0.0782979	0.101251	0.0589173	0.134246	0.0879818	0.0357292	0.0639057	0.0577756	0.0394082	0.0808845	0.0404757	0.0394831	0.0452053	0.0481352	0.0518682	0.0462098	0.0438701	0.030468	0.0700076	0.0924196	0.0374674	0.053319	0.0554518	0.0875554	0.0407734	0.0491911	0.0436682	0.0693147	0.0619875	0.0743347	0.115525	0	0.0468343	0.0810172	0.0674038	0.105457	0.0115525	0.0353647	0.0739257	0.0597253	0.105622
2510039O18Rik	0.332433	0.403662	0.413855	0.313879	0.422782	0.417601	0.403651	0.433304	0.474624	0.419352	0.362379	0.317726	0.333497	0.430526	0.491931	0.449526	0.340558	0.561333	0.328964	0.34815	0.405714	0.660302	0.508912	0.548432	0.476793	0.586534	0.447281	0.435684	0.371674	0.322934	0.462981	0.405027	0.42159	0.416736	0.379365	0.45786	0.384709	0.479586	0.430133	0.346574	0.401718	0.354134	0.345237	0.409801	0.446845	0.438001	0.368189	0.244565	0.348882
2510046G10Rik	0.0725358	0.0843017	0.108675	0.132966	0.100094	0.143378	0.128941	0.118639	0.113662	0.0819852	0.120683	0.0407734	0.135242	0.139951	0.0787667	0.101627	0.154948	0.0746466	0.145484	0.114808	0.0496125	0.0882793	0.0848752	0.112474	0.141875	0.07617	0.0992418	0.164352	0.132728	0.223673	0.113607	0.107656	0.0407734	0.129269	0.123556	0.146369	0.132638	0.100684	0.154033	0.173287	0.0776745	0.0952849	0.171864	0.0550117	0.16566	0.146798	0.117483	0.17525	0.102883
2600002D14Rik	0.00305351	0	0.0165035	0	0.00686284	0.0160451	0.0157533	0.0123776	0.0273611	0.0074532	0.0137257	0.0323121	0.0157533	0.00714585	0.0105022	0	0.0137711	0	0.0151784	0.00877401	0	0.00962704	0.0188611	0.0277259	0.00877401	0.007617	0	0	0.00936685	0.017773	0.0231049	0.00729629	0	0.0134158	0.0187972	0.00577623	0.0158253	0.00807803	0.0385082	0	0.00936685	0.0360076	0.0088865	0	0	0.00707293	0.0621774	0	0
2600006K01Rik	0.00305351	0	0	0	0.00686284	0.0179222	0.0157533	0.0123776	0.0136805	0.0074532	0.00686284	0	0.0157533	0.0214375	0	0.00407734	0.00918076	0.0213276	0	0.00877401	0	0	0.00471529	0.0184839	0	0.007617	0	0.0892232	0	0	0	0.00729629	0	0.00447192	0.0164476	0	0.00949517	0.00509667	0.0385082	0	0	0	0	0.0220047	0	0.0141459	0.0234965	0	0.0132028
2610001J05Rik	0.457408	0.652695	0.442817	0.543191	0.451804	0.553666	0.587394	0.643353	0.501292	0.539309	0.49348	0.540446	0.543644	0.535004	0.45173	0.436748	0.524721	0.45694	0.52239	0.513531	0.672995	0.575232	0.561589	0.575463	0.437224	0.506617	0.549774	0.565315	0.471373	0.410463	0.594921	0.523687	0.492412	0.489997	0.533118	0.479983	0.482236	0.487364	0.414151	0.173287	0.474717	0.582947	0.646551	0.469397	0.488261	0.692396	0.548655	0.552781	0.613466
2610002M06Rik	0.219164	0.33563	0.316371	0.34091	0.187629	0.198476	0.258123	0.248645	0.231108	0.351006	0.214822	0.312363	0.216685	0.225701	0.210542	0.266799	0.216183	0.256942	0.266531	0.297248	0.310897	0.266474	0.240926	0.243432	0.313714	0.259563	0.279271	0.152145	0.209254	0.198523	0.18641	0.2171	0.227718	0.258699	0.234658	0.238788	0.182022	0.218774	0.115525	0	0.223304	0.228107	0.216296	0.241224	0.177213	0.17509	0.163036	0.105935	0.255837
2610008E11Rik	0.18811	0.220213	0.141682	0.138629	0.148134	0.199263	0.246349	0.228642	0.188517	0.157784	0.167882	0.175019	0.248192	0.202512	0.138314	0.182174	0.217308	0.159155	0.193508	0.110421	0.158218	0.215067	0.159164	0.110904	0.231106	0.227937	0.235872	0.257942	0.293556	0.2059	0.147871	0.179379	0.227718	0.185628	0.176669	0.187784	0.203882	0.178866	0.192541	0.173287	0.188493	0.267851	0.251842	0.138464	0.246528	0.16975	0.184094	0.21187	0.197546
2610016A17Rik	0	0	0	0	0.00686284	0	0	0.00412588	0.00912036	0	0	0.0203867	0	0.00714585	0	0.00815467	0	0	0	0	0	0	0	0	0	0	0	0.00770164	0	0	0	0	0	0	0	0	0	0.0356767	0	0	0	0	0	0	0	0.0141459	0.0176224	0	0
2610020C07Rik	0.0974828	0.151461	0.0825175	0.271596	0.0960798	0.0986929	0.156524	0.129304	0.102991	0.153424	0.115244	0.0815467	0.11295	0.0941103	0.116417	0.104226	0.0872172	0.119114	0.159688	0.0884856	0.186508	0.136414	0.128114	0.166355	0.0526441	0.135239	0.107396	0.0815215	0.186465	0.159957	0.156766	0.0845272	0.146171	0.150949	0.134951	0.114109	0.118183	0.151651	0.154033	0	0.152257	0.154562	0.154091	0.121026	0.122282	0.180961	0.203888	0.0462098	0.163417
2610021A01Rik	0.26117	0.422887	0.447158	0.331321	0.402194	0.35845	0.415672	0.381765	0.265697	0.289554	0.397215	0.411198	0.375429	0.4897	0.397411	0.5018	0.462945	0.336014	0.43895	0.35577	0.427615	0.259206	0.459794	0.377531	0.337226	0.313019	0.252182	0.161155	0.406845	0.332927	0.411555	0.451702	0.451639	0.393623	0.402028	0.384619	0.417565	0.209446	0.385082	0	0.362307	0.426164	0.456914	0.468552	0.339835	0.280525	0.23796	0.490904	0.400464
2610027F03Rik	0.00305351	0	0	0	0	0.00320901	0	0	0	0	0.00343142	0	0	0	0	0	0	0	0	0.00438701	0	0	0	0	0	0	0	0	0	0	0	0	0	0	0	0	0	0	0	0	0	0	0	0.0110023	0	0	0	0	0.0066014
2610027K06Rik	0	0	0	0	0.00686284	0	0.00315067	0	0	0	0.00686284	0	0	0	0	0	0	0	0	0	0	0	0	0	0	0	0	0	0	0	0	0	0	0	0	0	0	0.00509667	0	0	0	0	0	0	0	0.0212188	0.00587413	0	0.0066014
2610028E06Rik	0.012214	0.0187337	0	0.0231049	0.0137257	0.00962704	0.030199	0.033007	0.0209082	0.0788918	0.0926484	0.0203867	0.0157533	0.00714585	0.0157533	0	0.0256371	0.0319914	0	0.00877401	0.0270099	0	0.00943057	0.00924196	0.0402285	0.007617	0.00815467	0	0.0281006	0	0.00924196	0	0.0407734	0.0134158	0.0211469	0.0173287	0.0221554	0	0	0	0.0281006	0	0.017773	0.0220047	0.0414151	0.0282917	0	0.0231049	0
2610028H24Rik	0.00916054	0	0	0	0.0137257	0.00641803	0	0	0	0	0.00343142	0	0.0157533	0.00714585	0	0	0	0	0	0	0	0	0.00471529	0.00924196	0	0	0	0	0	0.017773	0	0	0	0	0.00607376	0	0	0	0	0	0	0	0.017773	0	0	0.0324291	0.234975	0	0.0066014
2610035D17Rik	0.0183211	0.0187337	0.0165035	0.0231049	0.00686284	0.0160451	0.00630134	0.0123776	0.0228009	0.0149064	0.00686284	0	0.0157533	0.0142917	0.0367578	0.048928	0.00918076	0.0426552	0.0505947	0.00877401	0.0150684	0.0385082	0.0141459	0.00924196	0	0.030468	0	0.0154033	0.0187337	0.035546	0.0369678	0.0291851	0	0.0178877	0.0258462	0.03226	0.0221554	0.0254834	0	0	0.00936685	0.0180038	0	0	0.0231049	0.0536479	0.0117483	0.0231049	0.0198042
2610035F20Rik	0.00305351	0	0.0165035	0.12904	0.00686284	0	0.00630134	0	0	0.0074532	0	0.0203867	0	0	0	0	0	0	0.00505947	0.00438701	0.00753421	0	0	0	0	0	0	0	0	0.017773	0.00462098	0	0	0.00447192	0	0	0	0	0	0	0.00742306	0	0	0.0220047	0.0231049	0	0.0117483	0	0.0066014
2610037D02Rik	0.0878034	0.174083	0.177493	0.267669	0.11382	0.1768	0.155454	0.116226	0.11934	0.172521	0.146391	0.186944	0.128704	0.156671	0.154067	0.177717	0.164128	0.242654	0.245434	0.204039	0.102352	0.296991	0.179982	0.199487	0.147008	0.179647	0.0944716	0.139938	0.329432	0.152581	0.159816	0.152673	0.0407734	0.129349	0.164603	0.0866434	0.16118	0.166558	0.231049	0.346574	0.134671	0.20247	0.120723	0.192451	0.12904	0.193373	0.293821	0.0597253	0.188204
2610042L04Rik	0.0152676	0.0187337	0.0495105	0	0.0137257	0.0192541	0.0270484	0.0395464	0.0228009	0.0149064	0.0343142	0.0407734	0.0157533	0.0214375	0.00525112	0.00815467	0.0229519	0.0106638	0.0455352	0.0307091	0.0150684	0	0.00943057	0	0.026322	0.015234	0.00815467	0.0154033	0.0281006	0.035546	0.0323469	0.00729629	0.0407734	0.00894383	0.0117483	0.0115525	0.00316506	0.023368	0.0385082	0	0.0308402	0.0360076	0.0266595	0.033007	0.0462098	0.00707293	0.0293706	0.0231049	0.0462098
2610044O15Rik8	0.127788	0.160828	0.125178	0.0828302	0.154997	0.155123	0.174358	0.143394	0.188517	0.209956	0.181349	0.101933	0.16021	0.158423	0.147924	0.145785	0.158413	0.140441	0.152644	0.148828	0.183382	0.121156	0.157207	0.107068	0.150649	0.167574	0.198484	0.0924196	0.170195	0.142184	0.0932048	0.173322	0.0815467	0.216932	0.12768	0.145387	0.159866	0.131264	0.253575	0	0.188929	0.251377	0.133298	0.162338	0.170455	0.221665	0.124355	0.17525	0.183221
2610203C22Rik	0	0	0	0	0	0.00320901	0.00315067	0	0	0	0	0	0	0	0	0.0275419	0	0	0.00801907	0	0	0	0	0.00924196	0	0	0	0.0231049	0	0	0	0.0145926	0	0	0.00234965	0	0.00633011	0	0.0385082	0	0	0	0	0	0.0115525	0.00707293	0.00587413	0	0
2610204G07Rik	0.00610702	0	0	0	0	0.00641803	0.00945201	0.00825175	0.00456018	0	0	0.0203867	0	0	0.00525112	0	0	0	0.00505947	0.00438701	0	0	0	0	0.00877401	0.007617	0.00815467	0.00770164	0	0.017773	0	0	0	0	0.00234965	0	0.00316506	0	0	0	0	0	0.0266595	0	0.0115525	0	0	0.0462098	0.0066014
2610206C17Rik	0	0.00936685	0	0	0	0	0.00630134	0.00412588	0.00456018	0.0074532	0.00343142	0	0	0.00714585	0	0	0	0	0	0	0.00753421	0	0	0	0	0	0.00815467	0	0	0	0	0	0	0	0	0	0	0	0	0	0	0	0	0	0	0	0.00587413	0	0.0066014
2610300M13Rik	0	0.00936685	0.0165035	0	0	0	0	0.00825175	0.0182407	0	0	0	0	0.00714585	0	0	0	0	0	0	0.00753421	0	0.00943057	0.00924196	0	0	0	0	0.00936685	0	0.0138629	0.00729629	0	0	0.00234965	0	0.00316506	0	0	0	0.00468343	0.00900191	0	0.0110023	0	0	0	0	0.0066014
2610301B20Rik	0.297807	0.359843	0.247553	0.281185	0.318023	0.344167	0.249979	0.280182	0.332639	0.231755	0.319514	0.373889	0.232439	0.253747	0.267412	0.261416	0.314921	0.242654	0.208215	0.217537	0.301246	0.30171	0.305785	0.295048	0.110421	0.279962	0.391438	0.257363	0.351349	0.239791	0.332371	0.238989	0.292342	0.209844	0.264885	0.330236	0.311556	0.293591	0.154033	0.823959	0.32634	0.260379	0.368877	0.331112	0.329358	0.284789	0.315773	0.271596	0.226691
2610306M01Rik	0.0384283	0.0281006	0.033007	0.0231049	0.0549027	0.0550985	0.0365004	0.0412588	0.0638425	0.0447192	0.0205885	0.0407734	0.0630134	0.0214375	0.0315067	0.0203867	0.0183615	0.053319	0.0202379	0.026322	0	0.0441396	0.0377223	0.0184839	0.017548	0.045702	0.048928	0.0969248	0.0281006	0.017773	0.030429	0.0364814	0.0815467	0.0491911	0.0272206	0.0288811	0.0271719	0.0509667	0.115525	0	0.0187337	0.0630134	0.0088865	0.033007	0.0115525	0.0353647	0.0528672	0.0693147	0.033007
2610307P16Rik	0.0140002	0	0.0165035	0.0231049	0.0343142	0.0320901	0.0459524	0.0206294	0.0364814	0.0074532	0	0	0	0.0214375	0.0525112	0.0326187	0.0137711	0.0213276	0.0202379	0.026322	0	0.00962704	0.0282917	0.0369678	0.0526441	0.030468	0.00815467	0	0.065568	0.035546	0.0138629	0.0364814	0	0.0313034	0.0140979	0.0288811	0.0158253	0	0.0385082	0	0.0234171	0.0540115	0.0266595	0.033007	0	0.00707293	0.0881119	0.0462098	0.0066014
2610316D01Rik	0	0	0	0	0	0.00320901	0	0	0	0	0	0	0	0	0	0	0	0	0	0	0	0	0	0	0	0	0	0	0	0	0	0	0	0	0	0	0	0	0	0	0	0	0	0	0	0	0	0	0
2610318N02Rik	0.967494	1.22828	1.18122	0.794669	0.90748	0.969079	1.12106	1.02084	0.986977	0.95433	0.979757	0.743981	1.12483	1.00667	1.14073	1.04029	1.18195	0.951263	1.00451	1.06412	1.16854	0.721841	0.998391	0.978369	1.08665	0.628365	0.695186	0.669804	0.949072	0.981321	0.981753	1.12369	1.09642	1.13572	1.07521	1.10873	1.12841	0.653356	0.934388	1.42343	0.97936	0.913316	1.08105	1.1523	1.11242	0.774336	0.638045	1.14532	0.698822
2610507B11Rik	1.32131	1.36021	1.39199	1.30843	1.25723	1.50168	1.38556	1.2358	1.39593	1.38464	1.44507	1.69464	1.49391	1.49901	1.29948	1.3195	1.41275	1.73978	1.30821	1.44272	1.1677	1.32018	1.33834	1.3732	1.41898	1.20675	1.32562	0.815068	1.15081	1.11086	1.41601	1.37466	1.29316	1.3766	1.36557	1.32615	1.35599	1.3854	1.45778	1.14109	1.36375	1.37692	1.51148	1.37617	1.22396	1.36228	1.37462	1.35557	1.42616
2610507I01Rik	0	0	0	0	0	0.00320901	0	0	0	0.0074532	0	0	0	0	0	0	0	0	0	0	0	0	0	0	0	0	0	0	0	0	0	0	0	0	0	0	0.00316506	0	0	0	0	0	0	0	0	0	0.00587413	0	0
2610528A11Rik	0	0	0.0165035	0	0.0137257	0.00641803	0.00630134	0	0.00456018	0	0.00343142	0	0	0	0	0.00407734	0.00459038	0	0	0	0	0.00962704	0	0	0.00877401	0	0	0.0154033	0	0	0.00462098	0.00729629	0	0.00447192	0.00234965	0.00577623	0.00316506	0.0101933	0.0385082	0	0	0	0.0088865	0	0	0.00707293	0.0117483	0	0
2610528J11Rik	0.00916054	0.0991478	0.0495105	0	0.206535	0.0483817	0.0383434	0.0247553	0.0456018	0	0	0	0.0157533	0.0256176	0.0188251	0.0105398	0.0302275	0.0213276	0.0151784	0.013161	0.0571467	0.381669	0.159611	0.180309	0.0928726	0.0577747	0.024464	0.00770164	0.0281006	0.531854	0.0496981	0.0583703	0.0407734	0.0410071	0.0281958	0.0264838	0.0461622	0.04587	0	0	0.0214733	0.140294	0	0.0614476	0	0	0.0117483	0	0.08694
2700033N17Rik	0.0262143	0	0.0165035	0.0924196	0.00686284	0.00641803	0.00315067	0.00825175	0.00456018	0.101251	0	0.146171	0	0	0	0.00407734	0	0	0	0	0.00753421	0	0.00471529	0	0	0	0	0.00770164	0.00936685	0	0.00924196	0.00729629	0	0	0.0046993	0.00577623	0.00633011	0.0335614	0	0	0.00936685	0	0.017773	0.0110023	0.0115525	0.0424376	0.0974222	0	0
2700038G22Rik	0.379424	0.360715	0.243507	0.364015	0.363891	0.3619	0.431183	0.320187	0.333332	0.420058	0.391496	0.350038	0.326959	0.33896	0.255623	0.42938	0.386034	0.253317	0.364679	0.358975	0.425769	0.239952	0.328567	0.363577	0.271335	0.247627	0.28003	0.16566	0.322376	0.322934	0.372292	0.315671	0.268491	0.37839	0.364447	0.370235	0.388593	0.240892	0.497021	0.621227	0.317615	0.385729	0.331821	0.379688	0.356389	0.41372	0.374072	0.25808	0.209627
2700046A07Rik	0.00305351	0	0	0	0	0	0	0	0	0	0	0	0	0	0	0	0	0	0	0	0	0.0192541	0	0	0	0	0	0	0.0281006	0	0	0	0.0407734	0	0	0	0.00316506	0	0	0	0	0	0	0	0	0	0	0	0
2700046G09Rik	0.0201073	0.0281006	0.0495105	0.0462098	0.0411771	0.0256721	0.0346574	0.0288811	0.00456018	0.0074532	0.0171571	0.06116	0	0.0214375	0.0398295	0.036696	0.0275423	0.053319	0.0202379	0.0526441	0	0.00962704	0.0216194	0	0.017548	0.030468	0.0163093	0.0385082	0.0187337	0.088865	0.0323469	0.0291851	0	0.0178877	0.0399441	0.0173287	0.0411457	0.0254834	0.115525	0.173287	0.0234171	0.0180038	0.053319	0.0440093	0.0414151	0.0424376	0.0386809	0.0231049	0.0396084
2700049A03Rik	0.591767	0.675316	0.694146	0.438617	0.52457	0.596662	0.561509	0.646584	0.519883	0.60064	0.694304	0.669329	0.686635	0.583193	0.736059	0.679636	0.675168	0.727303	0.521241	0.53814	0.730018	0.496626	0.577499	0.618547	0.577623	0.641075	0.650109	0.475501	0.755578	0.494334	0.644264	0.735305	0.638583	0.622042	0.593333	0.69024	0.601852	0.50507	0.712778	0.722593	0.697074	0.547086	0.616058	0.724898	0.610355	0.432662	0.564667	0.685747	0.554
2700054A10Rik	0	0	0	0.0231049	0	0.0128361	0	0.0165035	0.00456018	0	0	0	0	0	0.0105022	0.00815467	0.00727558	0	0	0.0157273	0.0150684	0.00962704	0.00471529	0	0	0.015234	0.00815467	0.00770164	0.00936685	0.017773	0.00462098	0.0218889	0	0.00894383	0.0154724	0.0231049	0.00316506	0	0	0	0	0	0	0	0	0.00707293	0.0293706	0	0.0066014
2700062C07Rik	0.618811	0.793045	0.615863	0.658339	0.731914	0.617897	0.811133	0.686426	0.718758	0.653909	0.72166	0.703208	0.699454	0.674045	0.765196	0.705607	0.651511	0.697608	0.644893	0.517819	0.698688	0.65541	0.652943	0.633029	0.568189	0.717778	0.629322	0.424194	0.731137	0.638088	0.757155	0.871037	0.608535	0.699739	0.738325	0.672082	0.730741	0.561916	0.535529	0.722593	0.694305	0.834284	0.831311	0.669041	0.791287	0.508072	0.564905	0.664417	0.787456
2700068H02Rik	0	0	0	0	0	0	0	0.00412588	0.00456018	0	0	0	0	0	0	0.00407734	0	0	0.00505947	0	0	0	0.00943057	0	0	0.007617	0	0.0154033	0.00936685	0	0	0	0	0	0.00234965	0	0.00316506	0	0	0	0.00468343	0	0	0	0	0	0	0	0.0066014
2700081O15Rik	0.208736	0.287372	0.250357	0.138629	0.355601	0.3802	0.355264	0.34627	0.298393	0.162143	0.199931	0.227718	0.313882	0.310377	0.347963	0.40744	0.318731	0.265793	0.333643	0.466528	0.282606	0.194177	0.337197	0.348234	0.271335	0.133945	0.18833	0.494692	0.222509	0.262239	0.256782	0.361798	0.438513	0.343592	0.280415	0.354322	0.336395	0.20858	0.491167	0.51986	0.350393	0.300814	0.329642	0.329243	0.392802	0.21339	0.321647	0.267669	0.274023
2700097O09Rik	0.673036	0.757169	0.67233	0.579812	0.579877	0.764176	0.726476	0.704406	0.650519	0.55692	0.697274	0.598142	0.742827	0.692389	0.743214	0.5007	0.768371	0.725975	0.575473	0.546498	0.651672	0.652973	0.696737	0.803555	0.761074	0.622615	0.501326	0.401215	0.733616	0.518033	0.64132	0.711233	0.649308	0.708543	0.68396	0.755006	0.702679	0.552372	0.785518	0.51986	0.711017	0.662435	0.691464	0.732429	0.728523	0.562795	0.502315	0.687107	0.628395
2810001G20Rik	0.271294	0.207662	0.359032	0.550629	0.272316	0.243403	0.250807	0.171965	0.25882	0.239208	0.282812	0.125784	0.18904	0.239456	0.245919	0.207638	0.210812	0.268407	0.192177	0.150649	0.186508	0.268661	0.284882	0.272728	0.227465	0.258405	0.343269	0.217546	0.308402	0.2059	0.222245	0.269414	0.268491	0.224779	0.260462	0.202612	0.258764	0.262145	0.276101	0.693147	0.191668	0.267013	0.260729	0.219219	0.168492	0.324835	0.376952	0.142556	0.257465
2810002D19Rik	0.0786429	0.112402	0.0495105	0.0924196	0.104109	0.0903977	0.140236	0.0742658	0.120114	0.0757984	0.105533	0.0203867	0.103735	0.105436	0.0849101	0.0652374	0.0734461	0.0959742	0.075892	0.0840986	0.109886	0.170927	0.139502	0.0978258	0.0577766	0.115549	0.0326187	0.121338	0.0897809	0.053319	0.0581549	0.0583703	0.0407734	0.108846	0.108483	0.101575	0.0738719	0.138476	0.0770164	0.173287	0.0737869	0.126027	0.0814886	0.099021	0.133835	0.127313	0.104294	0.0693147	0.0962812
2810004N23Rik	2.32054	2.37824	2.27437	2.2895	2.30201	2.36228	2.41869	2.24255	2.28242	2.36199	2.38249	2.29631	2.14843	2.32994	2.27354	2.20455	2.28962	2.27255	2.4367	2.37846	2.30006	2.22343	2.36311	2.38215	2.42587	2.21217	2.45186	1.87194	2.44784	2.39442	2.42817	2.27636	2.40526	2.31811	2.34366	2.32045	2.30193	2.18301	2.19855	2.23815	2.16157	2.35127	2.30738	2.43077	2.1822	2.13559	2.09328	2.37639	2.31197
2810006K23Rik	0.508519	0.44113	0.537793	0.450772	0.491815	0.497528	0.613639	0.493096	0.495182	0.432431	0.593254	0.44351	0.689311	0.55378	0.549489	0.387433	0.561663	0.492364	0.432642	0.451805	0.495387	0.559078	0.499481	0.573727	0.374472	0.607381	0.667525	0.299206	0.464302	0.397046	0.621514	0.528254	0.536982	0.535476	0.575906	0.557481	0.574737	0.392069	0.568184	0	0.460223	0.567311	0.536225	0.571889	0.549479	0.478705	0.478367	0.720216	0.503464
2810013P06Rik	0.296934	0.370082	0.276514	0.450772	0.32437	0.407125	0.322156	0.271229	0.329786	0.240475	0.315242	0.236179	0.323098	0.297043	0.336174	0.288118	0.250221	0.242654	0.393324	0.280446	0.264806	0.275928	0.274211	0.299428	0.163065	0.251237	0.301736	0.42636	0.297443	0.462741	0.294618	0.351856	0.12232	0.362656	0.300229	0.256457	0.252191	0.172038	0.353117	0.693147	0.234975	0.392201	0.26494	0.357683	0.279222	0.41906	0.469402	0.369154	0.374673
2810021J22Rik	0.0811775	0.104627	0.167839	0.234975	0.0754913	0.114193	0.11711	0.118639	0.117447	0.120518	0.134992	0.134246	0.103735	0.0881787	0.12256	0.121321	0.110169	0.0915483	0.104149	0.0508233	0.11742	0.0922749	0.113968	0.0554518	0.138234	0.126328	0.15294	0.104626	0.127248	0.17773	0.161734	0.0875554	0.146171	0.0588948	0.117306	0.116506	0.117645	0.110877	0.154033	0	0.0917247	0.0900191	0.174042	0.0770164	0.11073	0.111433	0.162038	0.0924196	0.13589
2810029C07Rik	0.012214	0.00936685	0	0	0.0137257	0.0160451	0.0126027	0.0271687	0.0319213	0.0223596	0.0171571	0.0407734	0.0157533	0.0327634	0.00525112	0.0163093	0	0.0319914	0	0.013161	0.0301368	0	0.0141459	0.0184839	0	0	0	0.0154033	0	0	0.0138629	0.0218889	0	0.0178877	0.0258462	0.0288811	0.0126602	0.0203867	0	0	0	0.00900191	0	0.0110023	0.0231049	0.0819396	0.10917	0.0462098	0.0066014
2810030D12Rik	0.00610702	0	0	0.0231049	0.0205885	0.00962704	0.0220547	0.0123776	0.0182407	0	0	0	0.0157533	0.00714585	0.00525112	0	0.00918076	0.0213276	0	0.00438701	0.0226026	0.0192541	0.0282917	0.00924196	0	0.007617	0	0	0	0	0.00924196	0.0145926	0	0.00447192	0.0107731	0.0115525	0.00633011	0	0	0	0.0187337	0	0.017773	0	0	0	0	0.0231049	0.0066014
2810032G03Rik	0	0	0	0.0231049	0	0.00320901	0	0.00412588	0.0136805	0.0298128	0	0.0407734	0	0	0	0	0.00459038	0	0.00505947	0	0	0	0	0	0	0.007617	0.00815467	0.226556	0.00936685	0	0.00462098	0.00729629	0	0	0	0	0.00316506	0.00509667	0	0	0.00468343	0	0	0	0	0.00707293	0	0	0.0132028
2810402E24Rik	0.121681	0.136615	0.125178	0.156071	0.159012	0.157787	0.123947	0.127592	0.161156	0.113064	0.19734	0.113859	0.110273	0.155457	0.13217	0.156324	0.134681	0.19376	0.193979	0.148083	0.190214	0.0730208	0.189058	0.0739357	0.105288	0.121872	0.161095	0.155341	0.222509	0.213276	0.167141	0.121009	0.170022	0.148333	0.142975	0.138195	0.16118	0.129149	0.115525	0	0.150665	0.117025	0.161467	0.132028	0.133835	0.220463	0.154724	0.0828302	0.154076
2810403D21Rik	0.163177	0.17797	0.181539	0.105935	0.206412	0.191513	0.160376	0.156565	0.163049	0.175783	0.168465	0.186944	0.135242	0.135771	0.122699	0.177717	0.166034	0.161769	0.129446	0.123582	0.194043	0.187649	0.174111	0.152417	0.124327	0.17778	0.190329	0.115525	0.254497	0.216296	0.155981	0.206776	0.146171	0.127413	0.160069	0.17373	0.16751	0.157614	0.16643	0.173287	0.199091	0.207407	0.234069	0.203651	0.12904	0.13145	0.175543	0.188765	0.197546
2810403G07Rik	0.012214	0.00936685	0.0165035	0.0231049	0.00686284	0.00641803	0.0126027	0.0288811	0.0136805	0	0.0102943	0	0	0.0142917	0.0240762	0.00815467	0.0137711	0	0	0	0.00753421	0.0192541	0.00471529	0.0277259	0	0.007617	0.00815467	0.00770164	0.0468343	0	0.025808	0.00729629	0	0	0.0140979	0.00577623	0.0284855	0	0	0	0.0167899	0.00900191	0.0088865	0	0.0115525	0	0	0	0
2810405F17Rik	0.069198	0.065568	0.0825175	0.0828302	0.0549027	0.0992382	0.0716931	0.0453846	0.050162	0.0223596	0.0740671	0.0407734	0.04726	0.0428751	0.0525112	0.0407734	0.036723	0.127966	0.0695924	0.0709376	0.0872835	0.0673893	0.0782029	0.0700999	0.0701921	0.0501577	0.0815467	0.0629218	0.108515	0.071092	0.0415888	0.0583703	0.0646243	0.0402473	0.0812626	0.0635385	0.070169	0.0650075	0.0770164	0	0.0636242	0.0630134	0.0266595	0.07245	0.0529676	0.0890126	0.0514273	0.0462098	0.0462098
2810407A14Rik	0	0	0	0	0	0	0	0	0	0	0	0	0.0157533	0	0	0	0	0	0	0	0	0	0	0	0	0	0.00815467	0	0	0	0	0.0145926	0	0	0	0.00577623	0	0	0	0	0	0	0	0	0	0.0141459	0	0	0
2810408A11Rik	0.0486266	0.0804141	0.066014	0.0693147	0.0657801	0.0628484	0.0622411	0.0650027	0.0729629	0.0565322	0.0500472	0.0203867	0.0564752	0.0571668	0.0879818	0.0350038	0.0715409	0.0764587	0.0615734	0.0394831	0.0496125	0.00962704	0.0471529	0.0978258	0.026322	0.068553	0.0570827	0.0661183	0.0281006	0.106638	0.0554518	0.0480458	0	0.0670788	0.0891101	0.0635385	0.0791264	0.06116	0.154033	0.173287	0.0683076	0.0502753	0.113346	0.0880187	0	0.0353647	0.0646154	0.0462098	0.0368686
2810408I11Rik	0.8202	0.84109	0.576382	0.700209	0.857152	0.76459	0.867681	0.714053	0.814314	0.759704	0.922057	0.813237	0.843009	0.793352	0.824438	0.812263	0.855905	0.748941	0.7262	0.66917	0.761255	0.839063	0.878805	0.881992	0.789704	1.05204	0.956684	0.499638	0.789862	0.809603	0.857896	0.79662	1.14412	0.786832	0.884861	0.779971	0.779494	0.594496	0.606692	0.51986	0.792227	0.686396	0.728679	0.791709	0.706493	0.704023	0.881334	0.834801	0.881097
2810410L24Rik	0.0274816	0.0281006	0.0495105	0.0231049	0.0480399	0.0224631	0.04726	0.018917	0.0319213	0.0298128	0.0411771	0.0203867	0	0.0428751	0.0157533	0.0431585	0.048589	0.0426552	0.0252973	0.021935	0.0226026	0.0288811	0.0424376	0.0423741	0.0350961	0.022851	0.00815467	0.0770164	0.0468343	0.071092	0.039671	0.0437777	0	0.0339193	0.0352448	0.0288811	0.0348156	0.01529	0.0385082	0	0.0234171	0.0180038	0.017773	0.0440093	0	0.0353647	0.0704895	0.0231049	0.0264056
2810414N06Rik	0.00305351	0.00936685	0	0	0.00686284	0.0160451	0.020747	0.00825175	0.0182407	0.0074532	0.0102943	0	0.0157533	0.00714585	0.0157533	0.0285414	0.0137711	0.0106638	0.0101189	0.017548	0.00753421	0.00962704	0.0141459	0.00924196	0.00877401	0	0	0.0308065	0.0335798	0	0.0184839	0.0145926	0	0.0178877	0.0225213	0.0173287	0.0253204	0.00509667	0.0385082	0	0	0.0270057	0.0088865	0.0220047	0.0115525	0.0424376	0.0352448	0.0231049	0.0264056
2810429I04Rik	0.068215	0.155349	0.115525	0	0.117196	0.087734	0.101892	0.0601757	0.1239	0.111798	0.0863686	0.175019	0.0787667	0.0827844	0.0901613	0.0635451	0.110169	0.129778	0.0999492	0.104213	0.0571467	0.0866434	0.0809611	0.0369678	0.124327	0.089537	0.0584684	0.103909	0.0562011	0.053319	0.10515	0.081499	0.0407734	0.0883422	0.0763866	0.0876249	0.0923244	0.0335614	0.0770164	0	0.0878371	0.183098	0.0762903	0.0944546	0.10114	0.0353647	0.0328068	0.0693147	0.0956665
2810430I11Rik	0	0	0	0	0	0	0	0.00412588	0	0	0.00343142	0	0	0	0	0	0	0	0	0	0	0	0.00471529	0	0	0	0	0.0385082	0	0	0	0	0	0	0	0	0	0	0	0	0	0	0	0	0	0	0.00587413	0	0
2810433D01Rik	0	0	0.0165035	0	0.00686284	0.0128361	0	0.00825175	0	0.0074532	0	0	0	0.0142917	0.0105022	0	0	0	0.0151784	0.00438701	0.0150684	0.00962704	0.00471529	0.00924196	0	0	0	0.00770164	0.0187337	0	0.0138629	0	0	0.0134158	0.0107731	0	0.00633011	0	0	0	0.00936685	0.0180038	0.0088865	0.0220047	0	0	0.00587413	0	0.0132028
2810454H06Rik	0.111199	0.108515	0.174689	0.126889	0.0863686	0.135083	0.150702	0.146725	0.0847508	0.101251	0.14043	0.0815467	0.16021	0.126874	0.157139	0.0880092	0.197041	0.12354	0.131546	0.100901	0.216645	0.130783	0.166638	0.1402	0.124327	0.111094	0.15294	0.0276101	0.112402	0.117035	0.120931	0.147166	0.163093	0.138213	0.11673	0.0943827	0.131381	0.0781822	0.0385082	0.173287	0.153405	0.131293	0.188127	0.110023	0.19356	0.107296	0.154618	0.152145	0.140873
2810455O05Rik	0.0152676	0.00936685	0.0165035	0.0924196	0.00686284	0.0192541	0.0220547	0.00412588	0.0456018	0.0416258	0.0205885	0.0407734	0	0.0214375	0.0157533	0.0285414	0.0137711	0.0319914	0.0252973	0.0245013	0.0345441	0.0192541	0.0282917	0.0184839	0.0314545	0.0698473	0.048928	0.00770164	0.0281006	0.035546	0.00924196	0.00729629	0	0.0178877	0.0117483	0.0231049	0.0189903	0.0203867	0	0	0.00468343	0.0180038	0.0088865	0.0110023	0	0.0282917	0.0352448	0	0
2810457G06Rik	0.0048397	0	0	0	0	0	0	0.00412588	0.00912036	0.0074532	0.00343142	0	0	0	0	0.00815467	0	0	0	0.0157273	0	0.0481352	0	0	0	0	0	0.0969248	0	0.017773	0.00462098	0	0	0	0.00234965	0	0	0.03058	0	0.173287	0	0	0	0	0	0	0	0	0
2810459M11Rik	0	0	0	0.0828302	0	0.00320901	0.00315067	0.00825175	0.00912036	0	0.00343142	0	0	0.00714585	0.00525112	0.012232	0.00459038	0	0	0.00877401	0	0.0385082	0.00471529	0	0	0.030468	0.0129249	0.0231049	0.00936685	0	0.00462098	0.00729629	0	0.00447192	0.0046993	0	0.00316506	0.0101933	0	0	0.00468343	0	0	0	0	0.0212188	0.046993	0	0.105622
2810468N07Rik	0.0427492	0.0281006	0.066014	0	0.0343142	0.0307583	0.028356	0.033007	0.0273611	0.0298128	0.0308828	0.06116	0.0630134	0.0214375	0.0262556	0.0146171	0.0229519	0.0319914	0.0404757	0.013161	0.0150684	0.0577623	0.0424376	0.0369678	0.0526441	0.030468	0.0570827	0.172053	0.0843017	0.109658	0.0323469	0.0291851	0	0.0268315	0.0366192	0.0346574	0.0189903	0.0743347	0.0770164	0	0.0355236	0.0270057	0.0266595	0.033007	0.0231049	0.0212188	0.0352448	0.0231049	0.0368686
2900005J15Rik	0	0	0	0.0231049	0.00686284	0.0256721	0.00630134	0.00412588	0	0	0.00686284	0	0	0.0142917	0.00525112	0	0.00918076	0	0.0151784	0.017548	0.00753421	0.0385082	0.0188611	0.00924196	0	0.015234	0.00815467	0.0738199	0.0187337	0	0.00462098	0	0.0646243	0.00894383	0.00704895	0.00577623	0.0158253	0.0284647	0	0	0	0	0.0088865	0	0	0.0141459	0.0176224	0	0.0066014
2900009J06Rik	0.0529474	0.112402	0.066014	0.12904	0.10126	0.160209	0.0869111	0.12619	0.100324	0.0639854	0.159853	0.113859	0.126027	0.0899302	0.0682645	0.113166	0.085312	0.161769	0.144154	0.119195	0.0828763	0.125152	0.102581	0.101662	0.12946	0.130783	0.118936	0.0398169	0.065568	0.188127	0.119013	0.0887953	0.12232	0.159893	0.112607	0.113127	0.0746477	0.136361	0.192541	0.173287	0.0702514	0.0915488	0.125921	0.099021	0.0693147	0.19751	0.226343	0.115525	0.0935414
2900026A02Rik	0.241058	0.241242	0.233853	0.173099	0.221943	0.271985	0.238205	0.254099	0.286181	0.223035	0.227382	0.227718	0.257407	0.328183	0.291986	0.199483	0.314141	0.409477	0.239514	0.204039	0.264855	0.418147	0.263263	0.311101	0.199652	0.208248	0.219563	0.172053	0.352068	0.442381	0.381284	0.332052	0.363164	0.240051	0.280361	0.307669	0.231054	0.465256	0.192541	0.173287	0.240806	0.189893	0.25704	0.287103	0.231936	0.217527	0.200277	0.308216	0.216228
2900041M22Rik	0.0834826	0.142094	0.132028	0.105935	0.292781	0.167419	0.179887	0.166053	0.150836	0.0565322	0.065197	0.06116	0.126027	0.0839986	0.144852	0.102626	0.122815	0.0808845	0.139185	0.138563	0.146991	0.0481352	0.0959082	0.0554518	0.105288	0.015234	0.0407734	0.0770164	0.0749348	0.311201	0.159816	0.189155	0.146171	0.155421	0.146657	0.123264	0.145355	0.03058	0.13805	0.173287	0.109227	0.108023	0.20741	0.127462	0.0577623	0.0282917	0.0587413	0.105935	0.0264056
2900042K21Rik	0	0	0	0	0	0	0	0	0	0	0	0	0	0	0	0	0	0	0	0	0.00753421	0	0.00471529	0	0	0	0	0	0	0	0	0.00729629	0	0	0	0	0	0	0	0	0	0	0	0	0	0	0.00587413	0	0
2900045O20Rik	0	0	0	0	0	0.00320901	0	0	0	0	0	0	0	0	0	0	0.00459038	0	0	0.00877401	0	0.00962704	0	0	0	0	0	0.0122068	0	0	0	0.00729629	0	0.00447192	0.00234965	0	0.00316506	0	0.0385082	0	0	0	0	0.0220047	0.0115525	0	0	0	0
2900052L18Rik	0.172449	0.229412	0.225467	0.332533	0.29628	0.300137	0.212943	0.207312	0.152386	0.212489	0.13895	0.303902	0.166749	0.257927	0.177654	0.266492	0.175994	0.254696	0.320086	0.242705	0.17272	0.0537667	0.214954	0.132528	0.235422	0.166865	0.339751	0.490766	0.321504	0.444036	0.204108	0.265146	0.146171	0.198628	0.224281	0.192579	0.196533	0.107896	0.192541	0.173287	0.211994	0.256481	0.228871	0.338774	0.251322	0.300137	0.43275	0.308216	0.359733
2900052N01Rik	0.00305351	0	0	0	0	0	0.00315067	0	0	0	0	0	0	0	0	0	0	0.0106638	0	0	0.00753421	0	0	0.0146482	0	0.007617	0.00815467	0.0154033	0	0	0.00462098	0	0	0	0.00234965	0	0	0	0	0	0	0	0	0	0	0	0.00587413	0	0.0066014
2900060B14Rik	0.205863	0.252201	0.233853	0.115525	0.192687	0.194423	0.196948	0.260638	0.207108	0.364086	0.324892	0.37199	0.223224	0.212912	0.199148	0.274261	0.203537	0.227564	0.248393	0.227465	0.240528	0.307342	0.229893	0.239596	0.138234	0.287006	0.239257	0.199525	0.188929	0.223673	0.2103	0.264467	0.186944	0.221404	0.241265	0.272577	0.214986	0.361014	0.154033	0.51986	0.19786	0.159828	0.227361	0.166905	0.228217	0.242352	0.352803	0.225386	0.21461
2900060N12Rik	0.00305351	0	0	0	0	0.00320901	0.00630134	0	0	0.0074532	0	0	0	0	0	0	0.00459038	0	0.00505947	0.0113402	0.00753421	0	0.00471529	0	0	0	0	0	0	0	0.00462098	0	0.0407734	0	0.00234965	0	0	0.00509667	0	0	0	0.00900191	0	0	0	0	0.0234965	0	0
2900072N19Rik	0	0	0	0	0	0.00320901	0	0	0	0.0074532	0	0	0	0	0	0.00407734	0	0	0	0.00438701	0	0	0	0	0	0	0	0	0	0	0	0	0	0.00447192	0	0	0	0	0	0	0.00936685	0	0	0.0110023	0	0.00707293	0	0	0
2900076A07Rik	0.130842	0.241242	0.184343	0.315654	0.225958	0.142833	0.137085	0.298856	0.393047	0.230489	0.294328	0.166558	0.150995	0.148311	0.199148	0.117936	0.140397	0.238228	0.125247	0.111166	0.153245	0.136414	0.179982	0.1402	0.209759	0.111094	0.151554	0.204169	0.14987	0.188127	0.160602	0.138629	0.12232	0.173309	0.15725	0.139611	0.111077	0.24897	0.237593	0.173287	0.150665	0.240845	0.202211	0.116459	0.274427	0.294798	0.268328	0.0924196	0.17388
2900089D17Rik	0.00305351	0	0.0165035	0.0231049	0	0	0	0.00653936	0.0136805	0	0.00686284	0.0203867	0.0315067	0	0.0105022	0.00407734	0	0	0	0.00438701	0	0.0192541	0	0.00924196	0	0.007617	0.00815467	0	0	0	0	0.00729629	0	0.00447192	0.0046993	0.00577623	0	0.00509667	0	0.173287	0.00936685	0.00900191	0.0088865	0.0220047	0.0115525	0.0212188	0.00587413	0	0
2900093K20Rik	0.0747862	0.0804141	0.099021	0.0597253	0.21508	0.109652	0.0900618	0.0931828	0.077523	0.0937982	0.0637728	0.0815467	0.0630134	0.111368	0.0975918	0.100934	0.105579	0.0764587	0.112168	0.0658051	0.0948177	0.101902	0.100624	0.0277259	0.0438701	0.060936	0.0815467	0.0738199	0.103035	0.0741121	0.0747209	0.0802591	0.146171	0.0715507	0.130828	0.125661	0.118183	0.0730855	0.115525	0.173287	0.0702514	0.108023	0.147382	0.190582	0.0808672	0.121442	0.203608	0.17525	0.0974029
2900097C17Rik	0.663614	0.722657	0.614702	0.678879	0.773976	0.755425	0.714961	0.615794	0.975251	0.740047	0.600706	0.737053	0.62473	0.639518	0.636518	0.750097	0.62556	0.595205	0.723247	0.740782	0.589675	0.639979	0.708958	0.646276	0.522154	0.699061	1.01205	1.01412	0.832275	1.11629	0.651785	0.59764	0.743981	0.647017	0.609439	0.668117	0.618717	0.809075	0.756264	0.794513	0.613392	0.754206	0.765778	0.705858	0.620624	1.04835	0.873788	0.444694	0.764373
3010001F23Rik	0	0	0	0	0	0.00962704	0.00945201	0	0.00912036	0.0223596	0.0137257	0	0	0	0	0.00407734	0	0	0.00505947	0	0	0	0.00943057	0.00924196	0.017548	0	0.0163093	0	0	0	0	0.0145926	0	0.00894383	0.0046993	0	0.00316506	0.00509667	0	0	0	0	0	0.0174383	0.0231049	0	0	0	0.0066014
3010003L21Rik	0.143001	0.151461	0.250357	0.152145	0.207579	0.210767	0.197062	0.216649	0.199187	0.17705	0.168465	0.195406	0.292775	0.244722	0.21352	0.197791	0.272745	0.140441	0.237415	0.170763	0.204704	0.213431	0.211032	0.261916	0.267693	0.230926	0.165865	0.0276101	0.250609	0.234069	0.235678	0.269414	0.210795	0.231867	0.246183	0.232578	0.216543	0.129149	0.115525	0.346574	0.270851	0.298593	0.17924	0.206348	0.274427	0.258648	0.280077	0.277259	0.226691
3110001I22Rik	0.0878034	0.108515	0.115525	0.184839	0.116668	0.103779	0.134706	0.155772	0.123557	0.15469	0.108381	0.18348	0.103735	0.136985	0.114237	0.0733921	0.110169	0.119114	0.114268	0.121015	0.14443	0.121156	0.139147	0.0978258	0.0840986	0.091404	0.114165	0.0738199	0.0710472	0.053319	0.130958	0.128305	0.0407734	0.0894383	0.115532	0.113127	0.163569	0.115108	0.0770164	0.173287	0.148722	0.127556	0.0585173	0.099021	0.06452	0.086077	0.104294	0.138629	0.066014
3110006O06Rik	0	0	0	0	0	0.00641803	0.00315067	0	0	0	0	0	0	0	0	0	0	0	0.00505947	0.00438701	0.00753421	0	0.00471529	0.00924196	0	0	0.00815467	0	0	0	0.00462098	0	0	0.00447192	0	0	0.00316506	0	0	0	0	0.0180038	0	0	0	0.00707293	0	0	0
3110009E18Rik	0.281272	0.311585	0.412319	0.205793	0.338096	0.372314	0.340632	0.367216	0.275943	0.332446	0.398504	0.288878	0.483308	0.314557	0.290201	0.3572	0.342816	0.389333	0.332693	0.265464	0.336626	0.433405	0.385066	0.348234	0.292524	0.304692	0.359578	0.410817	0.4201	0.213276	0.320856	0.339909	0.390811	0.331433	0.347979	0.341892	0.329765	0.318209	0.13805	0.346574	0.266251	0.38773	0.363678	0.368686	0.260043	0.359124	0.410315	0.261592	0.34502
3110021N24Rik	0.0506424	0.0562011	0.066014	0.0231049	0.0686284	0.0979063	0.0887541	0.0808051	0.0273611	0.0341726	0.0623487	0.125784	0.0249685	0.0613468	0.0660851	0.0659302	0.085312	0.0319914	0.141194	0.0910518	0.0571467	0.0577623	0.0790041	0.0554518	0.0701921	0.0349237	0.0815467	0.0860267	0.112402	0	0.0997437	0.0480458	0.12232	0.0491911	0.0587413	0.0577623	0.0778128	0.0713534	0.13805	0	0.0636242	0.162034	0.0940633	0.105457	0.0693147	0.086077	0.0797998	0.0924196	0.172144
3110040N11Rik	0.360384	0.444313	0.4347	0.30429	0.259117	0.379518	0.43908	0.412143	0.625549	0.33554	0.418448	0.373889	0.433371	0.414599	0.338259	0.270876	0.357014	0.374243	0.350831	0.337892	0.378704	0.369839	0.406247	0.425145	0.436564	0.366338	0.417287	0.318976	0.397479	0.418772	0.476331	0.352153	0.455435	0.376416	0.405434	0.421777	0.393904	0.411206	0.330591	0.51986	0.364251	0.371991	0.462954	0.396102	0.29842	0.381291	0.381828	0.410225	0.392352
3110045C21Rik	0.0109467	0	0.0165035	0	0	0.00320901	0.00630134	0.00412588	0	0.0074532	0.00343142	0	0.0315067	0	0.0210045	0.00815467	0.00918076	0.0106638	0.0151784	0.00877401	0.00753421	0	0.00943057	0.00924196	0	0	0.00815467	0.00770164	0.0187337	0.035546	0.0138629	0	0	0.00447192	0.00234965	0	0.00633011	0.01529	0	0.173287	0.00468343	0.0270057	0	0	0	0	0	0	0
3110056K07Rik	0.22602	0.38652	0.357495	0.179176	0.275164	0.292932	0.291401	0.248571	0.304422	0.269021	0.290835	0.441977	0.405726	0.332901	0.328743	0.319425	0.363427	0.454135	0.369349	0.277471	0.279479	0.249579	0.305346	0.372124	0.282933	0.257111	0.199869	0.36852	0.349053	0.259219	0.337777	0.267626	0.24464	0.327224	0.274203	0.336116	0.277811	0.243008	0.276101	0.621227	0.273238	0.367563	0.299963	0.300802	0.205793	0.317218	0.346247	0.248491	0.27727
3110070M22Rik	0	0	0	0	0.00686284	0	0	0	0	0	0.00343142	0	0	0.00714585	0.00525112	0	0	0	0	0.00877401	0.0150684	0	0	0	0	0	0.0163093	0	0.00936685	0	0	0.00729629	0	0	0.00234965	0.00577623	0	0.00509667	0	0	0.00468343	0	0	0.0110023	0	0	0.0117483	0	0.010463
3110082I17Rik	0.844172	0.985328	0.951273	0.596839	0.890033	0.821049	0.904226	0.963536	0.963131	0.759351	0.902729	1.02333	1.01141	0.810752	0.828373	0.904718	0.871499	0.630192	0.748315	0.826064	0.874109	0.797459	0.942142	0.974033	0.834908	0.95646	0.834442	0.707206	0.81227	0.980076	0.935682	0.854442	1.028	0.879845	0.935038	0.87054	0.90369	0.60299	0.762993	0.693147	0.784138	0.774739	0.932984	0.925495	0.843315	0.709605	0.627429	0.981283	0.896725
3110082J24Rik	0.00610702	0	0	0	0.00686284	0	0.00315067	0	0.00456018	0.0149064	0	0	0	0.00714585	0	0	0	0.0106638	0.00505947	0	0	0	0.00471529	0	0	0.007617	0	0.0385082	0	0	0	0	0	0	0.00234965	0	0.00633011	0.00509667	0	0	0.00468343	0	0	0	0	0.00707293	0.0176224	0	0.0132028
3110083C13Rik	0.0109467	0.0187337	0	0	0.00686284	0.00320901	0.0157533	0.00412588	0.00912036	0.0223596	0.00686284	0.0407734	0	0.00714585	0.00525112	0.0553905	0	0.0426552	0	0.0201143	0	0.00962704	0.00471529	0.0184839	0.017548	0	0.024464	0.0154033	0.00936685	0	0.0138629	0.00729629	0	0.00894383	0.00939861	0.0115525	0.00949517	0.00509667	0	0	0.00936685	0.00900191	0.017773	0.0220047	0	0.0141459	0.0117483	0	0.0594126
3200001D21Rik	0.00305351	0.00936685	0	0	0	0	0.00315067	0.00825175	0	0	0.00343142	0.0203867	0	0.00714585	0.00525112	0.00815467	0.00459038	0	0.00505947	0	0.00753421	0	0.00943057	0	0.00877401	0	0.00815467	0.00770164	0	0	0.0119451	0	0	0	0.00234965	0	0.00316506	0.0101933	0	0.173287	0	0.00900191	0	0	0	0	0.00587413	0	0.0066014
3222401L13Rik	0.180217	0.179562	0.316371	0.188765	0.200189	0.281371	0.191717	0.261966	0.301061	0.131064	0.181024	0.186944	0.191717	0.192401	0.20747	0.131168	0.242172	0.244466	0.297748	0.180283	0.194043	0.14041	0.222065	0.213275	0.169688	0.235554	0.325574	0.403115	0.214733	0.287388	0.166008	0.187915	0.42159	0.198284	0.230135	0.224839	0.215823	0.256483	0.314609	0	0.135467	0.244581	0.260729	0.216325	0.281185	0.348862	0.285951	0.238901	0.237154
3300002A11Rik	0	0	0	0	0.00686284	0	0.00315067	0	0	0	0	0	0	0	0	0	0	0	0	0	0	0	0.00471529	0.00924196	0	0	0	0	0	0	0	0	0	0	0	0	0.00316506	0	0	0	0	0	0.0088865	0	0	0	0	0	0
3300002I08Rik	0.0458027	0.0468343	0.066014	0.105935	0.0343142	0.0513442	0.0459524	0.0477981	0.0684027	0.113064	0.0446085	0.0407734	0	0.0500209	0.0345784	0.0448507	0.0439986	0.0275655	0.0303568	0.0350961	0.0420783	0.0537667	0.0621	0.0739357	0.0614181	0.0577747	0.024464	0.0231049	0.0616804	0.035546	0.0489129	0.0626383	0.0407734	0.0268315	0.0379937	0.06452	0.0448486	0.0539481	0	0	0.0374674	0.0360076	0.071092	0.07245	0.0943827	0.046575	0.0646154	0.0693147	0.0462098
3300002P13Rik	0.00916054	0	0.0165035	0	0.0108773	0.0192541	0.00315067	0.0165035	0	0.0149064	0.00343142	0	0.0157533	0.0184717	0.00525112	0.00407734	0.00459038	0	0.0101189	0	0	0	0.00471529	0.00924196	0	0.007617	0	0.0154033	0.0187337	0.0459426	0.00462098	0	0	0.00447192	0.0117483	0	0.00316506	0.0101933	0.0385082	0	0.00936685	0	0.0088865	0	0.0346574	0.00707293	0.0234965	0	0.0066014
3300005D01Rik	0	0	0	0	0	0	0	0	0	0	0	0	0	0	0	0	0	0	0.0101189	0	0	0.0288811	0	0	0	0	0	0.00770164	0	0	0	0	0	0	0	0.00577623	0	0.0356767	0	0	0	0	0	0	0	0	0	0	0
3632454L22Rik	0.00305351	0.00936685	0	0	0	0.0160451	0.00945201	0	0.00912036	0.037266	0.0102943	0.0323121	0.0157533	0	0.00525112	0.00407734	0.00459038	0	0	0.00438701	0	0	0	0	0	0	0.0326187	0	0.0187337	0	0	0.00729629	0	0.00447192	0.0046993	0.0207076	0	0	0	0	0.00468343	0.00900191	0	0.0220047	0.0115525	0.0212188	0.0293706	0	0.0066014
3830403N18Rik	0.0048397	0	0	0	0	0	0	0	0	0	0	0	0	0	0	0.00407734	0	0	0	0	0.0119414	0	0	0	0	0	0	0	0	0	0	0	0	0	0	0	0	0	0	0	0	0	0	0	0	0	0	0	0
3830406C13Rik	0.208217	0.155349	0.290214	0.229312	0.1796	0.236985	0.225602	0.30127	0.272925	0.287021	0.180183	0.385814	0.245515	0.31618	0.223224	0.196098	0.263212	0.157343	0.166582	0.190878	0.357949	0.180554	0.293596	0.248838	0.187236	0.294623	0.165865	0.361989	0.262991	0.297785	0.266809	0.214072	0.24464	0.233723	0.255006	0.250784	0.252434	0.265035	0.35897	0	0.233819	0.288753	0.336192	0.274231	0.269633	0.238214	0.182549	0.30429	0.205151
3830408C21Rik	0.0183211	0.0374674	0.0165035	0.0462098	0.00686284	0.0532214	0.0315067	0.0288811	0.0273611	0.0223596	0.0191644	0.0203867	0	0	0.0210045	0.024464	0.0302275	0.0275655	0.0202379	0.017548	0.0150684	0.0288811	0.033007	0.0184839	0.00877401	0.030468	0.00815467	0.0584166	0	0.035546	0.0277259	0.0218889	0.0407734	0.0357753	0.0187972	0.0115525	0.0348156	0.0356767	0.0770164	0	0.0234171	0.0180038	0.0444325	0.033007	0.0414151	0.0424376	0.0621774	0.0231049	0.033007
3830417A13Rik	0	0	0	0	0	0	0.00814436	0.00825175	0	0.0074532	0.0102943	0.0407734	0	0.00714585	0	0	0	0	0	0	0	0.160012	0.0412818	0.0462098	0	0	0.00815467	0	0.0374674	0.017773	0	0	0	0	0.0046993	0.0091551	0	0	0	0	0	0.00900191	0	0	0	0.0353647	0.0234965	0	0.0066014
3830432H09Rik	0	0	0	0	0	0.00641803	0.00315067	0	0	0.0074532	0	0	0	0	0.00525112	0	0	0	0	0	0	0	0	0	0	0	0	0	0	0	0.00462098	0	0	0	0.0046993	0.0115525	0.00633011	0.01529	0	0	0.00468343	0	0	0	0.0231049	0	0.0117483	0	0
3930402G23Rik	0.00305351	0.0187337	0.0165035	0.0462098	0.0137257	0	0	0.0165035	0.00912036	0.0149064	0.0137257	0.0407734	0	0.0142917	0.0157533	0.00407734	0.00459038	0.0106638	0.0101189	0	0	0.0288811	0	0.00924196	0	0	0	0	0.00936685	0.053319	0.00924196	0.00729629	0	0.0134158	0	0	0.0126602	0	0	0	0.0140503	0.0180038	0	0.0284406	0	0	0.00587413	0	0.0396084
4430402I18Rik	0.0183211	0.00936685	0.0165035	0.0231049	0.0205885	0.00320901	0.00945201	0.0123776	0.0209082	0.0149064	0.02402	0	0	0.0142917	0.0105022	0.00815467	0.0183615	0.0213276	0.0252973	0.021935	0.00753421	0.0192541	0.0141459	0.0184839	0.0350961	0.015234	0.0163093	0.0706234	0.0187337	0.035546	0.0277259	0.0553421	0	0.0313034	0.0305455	0.0231049	0.0221554	0.0386581	0	0	0.032784	0.0360076	0.0318578	0.033007	0.0529676	0.046575	0.0714877	0.0231049	0.0264056
4632404H12Rik	0.0463215	0.0749348	0.0921715	0.0462098	0.097246	0.0615166	0.0724654	0.0643016	0.0410416	0.0298128	0.05691	0.0203867	0.126027	0.0714585	0.0713362	0.0733921	0.0906824	0.0213276	0.0636732	0.0438701	0.0872835	0.0288811	0.0593417	0.0462098	0.0350961	0.015234	0.0407734	0.0969248	0.0281006	0.017773	0.0554518	0.0364814	0.0815467	0.0715507	0.0638399	0.0495887	0.0796642	0.0101933	0	0	0.0436586	0.104287	0.088865	0.0440093	0.0924196	0.0282917	0.0563033	0	0.0671358
4632404M16Rik	0	0	0	0	0	0.00320901	0	0	0.00456018	0	0.00343142	0	0	0.00714585	0	0.00407734	0.00459038	0.0106638	0	0	0	0	0	0	0	0	0	0	0	0	0	0	0	0.00894383	0.00234965	0.0115525	0	0.00807803	0	0	0	0.00900191	0	0.0110023	0	0	0	0	0
4632411P08Rik	0.00610702	0.0187337	0	0.0231049	0.00686284	0.00320901	0.00945201	0.00412588	0	0	0.00686284	0	0	0	0	0	0.0137711	0	0.00505947	0	0.0150684	0.00962704	0.00471529	0	0.00877401	0.007617	0	0.0154033	0	0.017773	0.00462098	0.00729629	0	0	0.00939861	0.0115525	0.00633011	0.01529	0	0	0	0	0.0088865	0	0.0115525	0	0.00587413	0	0.0066014
4632427E13Rik	0.465102	0.525279	0.531513	0.717502	0.479255	0.6655	0.597752	0.474813	0.421175	0.638421	0.549954	0.767467	0.551035	0.566683	0.542272	0.526663	0.534254	0.497541	0.431791	0.471152	0.512045	0.456436	0.542281	0.525402	0.436365	0.569869	0.663569	0.5945	0.736295	0.626759	0.555515	0.465317	0.390811	0.560684	0.55016	0.552886	0.537547	0.500816	0.554469	0.89588	0.425389	0.595008	0.612313	0.619314	0.527524	0.610167	0.71971	0.596839	0.677011
4632428C04Rik	0	0.00936685	0	0.0231049	0.0137257	0.0224631	0.0126027	0.00412588	0	0.0074532	0.00343142	0	0	0	0.00525112	0.00407734	0.00459038	0	0	0.00438701	0.0150684	0.00962704	0.00471529	0	0	0.015234	0.00815467	0	0	0.0814886	0	0.00729629	0	0	0.00234965	0	0.0126602	0	0	0	0.00468343	0.00900191	0.017773	0.0110023	0.0115525	0.0141459	0.0117483	0	0.0132028
4731419I09Rik	0.00789321	0	0.0165035	0	0.0205885	0	0.0220547	0.0165035	0	0	0.0157329	0	0	0	0.0157533	0.00815467	0.0137711	0	0	0.00438701	0	0	0.00943057	0.00924196	0.00877401	0.038085	0.0163093	0.00770164	0.065568	0.017773	0.0138629	0	0	0.00447192	0.00234965	0.00577623	0.00316506	0	0	0	0.00936685	0	0.0088865	0.0110023	0.0115525	0.0141459	0.0117483	0	0
4732414G09Rik	0	0	0	0.0231049	0	0	0	0.00412588	0	0	0	0	0	0.00714585	0	0	0	0	0	0	0	0	0	0	0	0	0	0.00770164	0	0	0	0	0	0	0	0	0	0	0	0	0	0	0	0	0	0	0.0176224	0	0
4732419C18Rik	0.0140002	0	0	0	0.0383287	0.0211312	0.00630134	0.0147911	0.00456018	0.011813	0.0479619	0	0.0680848	0.00714585	0.00525112	0.012232	0.00459038	0	0.0101189	0.017548	0.0150684	0.0633937	0.0424376	0.0462098	0	0.0349237	0	0.0154033	0.0281006	0.0281695	0.00924196	0.0188606	0.0646243	0.0178877	0.0234965	0.0115525	0.0271719	0.0692381	0.122068	0	0.00468343	0.0180038	0.0318578	0.0110023	0.0231049	0.0424376	0.0792529	0	0.0066014
4732440D04Rik	0.0262143	0.0187337	0.099021	0.0693147	0.0617656	0.0781069	0.0477954	0.0536364	0.0756304	0.0937982	0.0308828	0.163093	0.0157533	0.0571668	0.0774796	0.0326187	0.0623601	0.0764587	0.064533	0.0508233	0.0540197	0.0770164	0.0471529	0.051616	0.0614181	0.07617	0.0373889	0.12904	0.0897809	0.088865	0.072803	0.0699346	0.0407734	0.0659826	0.0712881	0.0346574	0.0524923	0.0875094	0.0385082	0	0.0804141	0.0810172	0.053319	0.07245	0.0231049	0.0395021	0.087565	0.142556	0.0962812
4732463B04Rik	0	0.0374674	0	0	0.0137257	0.00962704	0.0126027	0.00825175	0.0209082	0	0.00686284	0.0203867	0	0.0214375	0.0105022	0.0203867	0.0229519	0	0.0101189	0.00438701	0.0150684	0.0192541	0.00943057	0	0.0350961	0	0.00815467	0	0	0.017773	0.00462098	0.00729629	0	0.00894383	0.0117483	0.0173287	0.00316506	0.0101933	0	0	0.0214733	0.0270057	0.017773	0.0110023	0.0231049	0.0282917	0.0293706	0	0.0170644
4732465J04Rik	0	0	0	0	0	0	0	0	0	0	0.00343142	0	0	0	0	0	0	0	0	0	0	0	0	0	0	0	0	0	0	0	0	0	0	0	0	0	0.00316506	0.0416394	0	0	0	0	0	0	0	0	0	0	0
4732471J01Rik	0.00610702	0	0.0165035	0	0.0205885	0.0288811	0.0333497	0.033007	0.0136805	0.0223596	0.0225958	0.0203867	0.04726	0.0357292	0.0534034	0.0326187	0.0229519	0.0213276	0.0303568	0.0332753	0.0226026	0.0385082	0.0518682	0.0184839	0.0350961	0.0393793	0.0326187	0.0231049	0.0374674	0.0459426	0.0231049	0.0218889	0	0.0339193	0.0258462	0.03226	0.0284855	0.0254834	0.0385082	0	0.0234171	0.0180038	0.0266595	0.0440093	0.0577623	0.0141459	0.0234965	0	0.0198042
4732487G21Rik	0	0.00936685	0	0	0	0	0	0	0	0	0	0	0.0157533	0	0	0	0	0	0	0.00438701	0	0	0	0	0	0	0	0	0	0	0	0	0	0	0	0	0.00316506	0	0	0	0	0	0	0	0	0	0	0	0
4732491K20Rik	0.0140002	0.00936685	0	0.0597253	0.0411771	0.0160451	0.0315067	0.0165035	0.0273611	0.0521724	0.0274514	0	0.04726	0	0.0105022	0.0326187	0.0321327	0.0275655	0.0404757	0.00877401	0.00753421	0.00962704	0	0.00924196	0.00877401	0.123166	0.0163093	0.0430133	0.0281006	0.0637156	0.0119451	0.00729629	0.0407734	0.0268315	0.0234965	0.0264838	0.0126602	0.0518328	0.0770164	0	0.0140503	0.0360076	0.017773	0.0440093	0.0346574	0.0282917	0.0234965	0.0231049	0.04347
4732496C06Rik	0.00610702	0	0	0	0.0108773	0	0	0	0.00456018	0	0	0	0	0	0	0	0	0	0	0	0	0	0.00471529	0	0	0	0.00815467	0	0	0	0	0	0	0	0	0	0	0	0	0	0	0.0180038	0	0	0	0.0141459	0	0	0
4831440D22Rik	0.00789321	0	0	0.0231049	0.00686284	0.00641803	0.00315067	0	0.00912036	0	0.00343142	0	0	0.0142917	0.0105022	0.00407734	0.00459038	0	0	0	0	0	0	0	0.00877401	0	0	0	0.00936685	0	0	0.0145926	0	0.00447192	0	0	0.00316506	0	0	0	0	0	0.0088865	0	0.0115525	0	0	0	0
4833405L11Rik	0.00305351	0	0	0	0	0.00320901	0	0	0.00456018	0.0074532	0	0	0	0.0214375	0	0	0	0	0	0	0	0	0	0	0	0	0.00815467	0	0	0	0	0	0	0	0	0	0	0	0	0	0	0.00900191	0.0088865	0	0	0	0	0	0
4833407H14Rik	0.012214	0.185041	0.066014	0.0462098	0.100094	0.0532214	0.0409587	0.0271687	0.0820832	0.0223596	0.0171571	0	0.04726	0.0500209	0.0420089	0.0326187	0.0688557	0.0426552	0.0788516	0.026322	0.0301368	0.121156	0.128915	0.101662	0.0701921	0	0.00815467	0	0.0187337	0.134808	0.0184839	0.0437777	0.0407734	0.0473351	0.0375944	0.0438125	0.0379807	0.03058	0	0	0.0515177	0.0810172	0.0496308	0.0440093	0.0414151	0.0212188	0.0176224	0.0462098	0.0132028
4833408A19Rik	0.00916054	0	0.0165035	0.0231049	0.0205885	0.0160451	0.0220547	0.00825175	0.0345888	0.0074532	0.0308828	0.0203867	0	0.0285834	0.0105022	0.0268491	0.0321327	0	0.0484948	0.026322	0.0150684	0.0192541	0.0282917	0	0.00877401	0.030468	0	0.0308065	0.00936685	0.071092	0.0184839	0.0291851	0.0815467	0.00447192	0.0164476	0.0346574	0.0253204	0.0203867	0	0.173287	0.00468343	0.0270057	0.0266595	0	0.0231049	0.0141459	0.0117483	0	0.0396084
4833412C05Rik	0	0	0	0	0.00686284	0	0	0	0	0	0.00343142	0	0	0	0.00525112	0.00407734	0	0.0106638	0	0	0	0	0	0	0	0	0	0.0231049	0	0	0	0	0	0	0	0	0	0	0	0	0	0	0	0	0	0	0	0	0
4833413E03Rik	0	0	0	0	0	0.00320901	0	0	0	0	0	0	0	0.00714585	0.00525112	0.00815467	0	0	0	0	0	0	0	0	0	0	0	0.0154033	0	0.017773	0	0.0145926	0	0.00447192	0.00234965	0	0.00633011	0	0	0	0	0	0.0088865	0.0110023	0	0	0	0	0.0066014
4833413G10Rik	0.00305351	0.00936685	0.0165035	0.0231049	0	0.0192541	0.00315067	0.0206294	0.00456018	0	0.0102943	0	0.0157533	0	0.0105022	0.0203867	0.00459038	0	0.00505947	0.013161	0.0150684	0.0192541	0	0.00924196	0	0.022851	0.00815467	0	0.0374674	0	0	0.0145926	0	0	0.00842341	0.0231049	0.00316506	0.01529	0	0	0	0.0180038	0	0.0110023	0.0346574	0.0141459	0.0117483	0	0.0066014
4833417C18Rik	0.0908569	0.0991478	0.108675	0.0693147	0.0795058	0.11607	0.130784	0.0684275	0.0456018	0.0670788	0.0534786	0.0407734	0.144457	0.092896	0.0682645	0.106704	0.0504942	0.0959742	0.120187	0.0928726	0.105479	0.0481352	0.0998223	0.101662	0.0701921	0.083787	0.130475	0	0.0858933	0.142184	0.0462098	0.0918235	0	0.0920542	0.0887108	0.0669174	0.0986545	0.01529	0.115525	0.173287	0.072991	0.0720153	0.134808	0.132028	0.0577623	0.0748667	0.124355	0.12904	0.102883
4833418N02Rik	0.00610702	0	0	0.0924196	0.00686284	0.00320901	0	0.00412588	0.0136805	0.0074532	0.00686284	0.0407734	0	0.00714585	0.0105022	0.012232	0	0	0.00505947	0.00438701	0.0150684	0	0.00471529	0	0.017548	0.007617	0.00815467	0.0860267	0.00936685	0.053319	0	0	0	0.00894383	0	0.00577623	0	0.00509667	0.0385082	0	0.00468343	0.00900191	0	0	0.0115525	0.0282917	0.0269327	0	0.0066014
4833419F23Rik	0	0	0	0	0	0.00320901	0.00630134	0	0	0.0074532	0	0	0.0157533	0	0.00525112	0.00815467	0.00459038	0	0.0202379	0.00438701	0	0.00962704	0	0.00924196	0.017548	0	0	0.00770164	0	0	0.00462098	0.00729629	0	0.00447192	0.00704895	0.00577623	0.00949517	0.023368	0.0385082	0	0.00936685	0	0.0088865	0	0	0	0	0	0
4833419O12Rik	0	0	0	0	0	0	0	0	0.00456018	0	0	0	0	0	0	0	0	0	0	0	0	0	0	0	0	0	0	0	0	0	0	0	0	0.00447192	0	0	0.00316506	0	0	0	0.00468343	0	0	0	0	0	0	0	0
4833420G17Rik	0.800795	0.738207	0.815575	0.686959	0.860191	0.777417	0.875019	0.89415	0.811854	0.547773	0.664704	0.614732	0.920208	0.900016	0.781131	0.804256	0.842636	0.915522	0.919702	0.811124	0.84802	0.693351	0.781729	0.740748	0.856772	0.636246	0.768299	0.645807	0.866007	0.873926	0.799151	0.748263	0.893948	0.810742	0.813181	0.825435	0.874551	0.553655	0.881228	0.621227	0.880587	0.912933	0.730915	0.771027	0.877991	0.666995	0.83458	0.971279	0.724687
4833422C13Rik	0	0	0.0165035	0	0	0	0	0	0.00912036	0	0	0	0	0	0.00525112	0.00407734	0	0.0213276	0	0.00438701	0	0	0	0	0	0	0	0.00770164	0	0.017773	0.00462098	0.00729629	0	0	0	0	0	0	0	0	0.00468343	0	0	0	0	0	0	0	0
4833422M21Rik	0	0.0187337	0	0	0	0.00641803	0.00630134	0	0	0.0074532	0.00686284	0	0.0157533	0.00714585	0	0.012232	0	0.0106638	0.0252973	0.0420493	0.00753421	0	0.00943057	0.00924196	0.00877401	0	0	0	0.00936685	0.035546	0.00924196	0.00729629	0	0	0.0046993	0	0.00949517	0.00509667	0	0	0	0.0450096	0.0088865	0.0220047	0	0.0141459	0.00587413	0	0.0132028
4833427G06Rik	0	0	0	0	0	0	0.00630134	0	0	0.0298128	0.00343142	0.06116	0	0	0	0.00407734	0	0	0	0	0	0	0.00943057	0.00924196	0	0	0	0.202143	0.00936685	0	0	0	0	0	0.0046993	0	0	0.00807803	0	0	0.00468343	0	0	0	0	0	0.00587413	0	0
4833438C02Rik	0.0170537	0.0281006	0.0165035	0.0462098	0.0205885	0.0224631	0.0315067	0.0395464	0.0273611	0.0521724	0.00686284	0.0203867	0.0630134	0.0428751	0.0262556	0.0811671	0.0413134	0.0426552	0.0455352	0.0595973	0.0452053	0.0385082	0.0141459	0.00924196	0.0402285	0.022851	0.0163093	0.104626	0.0468343	0	0.0231049	0.00729629	0	0.0402473	0.0305455	0.0462098	0.0189903	0.0416394	0	0	0.0308402	0.0232696	0.035546	0.033007	0	0.0677938	0.0680516	0.0693147	0.0302672
4833439L19Rik	1.17237	1.07638	1.0833	1.45431	1.17084	1.28475	1.1837	1.16316	1.13039	1.02891	1.08944	0.949746	1.04577	1.10496	1.1049	1.02898	1.15707	1.17547	1.1438	1.12789	1.18101	1.17602	1.12958	1.17061	1.08292	0.796388	1.03627	0.927322	1.16395	1.24824	1.08444	1.14082	0.930925	1.17461	1.14119	1.12124	1.14932	1.25234	1.22446	1.06917	1.2594	1.13157	1.1365	1.21149	1.1266	1.13939	1.20443	1.12694	1.14342
4833445I07Rik	0	0	0	0	0.0137257	0	0.018904	0.00825175	0.00456018	0.0074532	0.00686284	0	0.0157533	0.0214375	0.0157533	0.00815467	0.00459038	0.0106638	0.00505947	0.013161	0.00753421	0.00962704	0.00471529	0	0	0.007617	0.00815467	0	0	0	0.00462098	0	0	0.00894383	0.00234965	0	0.00633011	0.00509667	0	0	0.00936685	0.00900191	0.017773	0	0.0115525	0	0	0	0.0132028
4921501I09Rik	0.00305351	0	0	0	0	0	0	0	0	0	0	0	0	0	0	0.00815467	0	0	0	0	0	0	0	0	0	0	0	0.00770164	0	0	0	0	0	0	0	0	0.00316506	0.00509667	0	0	0	0	0	0	0	0	0.00587413	0	0
4921504A21Rik	0.00610702	0	0	0	0	0.00320901	0	0	0.00912036	0	0.00343142	0	0	0	0	0.00815467	0.00459038	0	0	0.00438701	0	0	0.00471529	0	0.017548	0.007617	0	0.00770164	0	0	0	0.0145926	0	0	0.0046993	0	0	0.00509667	0.0385082	0	0	0	0.0088865	0	0	0.0141459	0	0	0.0066014
4921507G05Rik	0	0	0.033007	0	0	0.00641803	0	0.0123776	0.0163481	0	0	0.0203867	0.0315067	0.0142917	0.00525112	0.00407734	0.00459038	0	0	0	0	0	0	0	0	0	0.00815467	0	0	0	0.00462098	0.0145926	0.0407734	0	0	0.00577623	0.00316506	0	0	0	0.0167899	0	0	0.0110023	0	0	0	0	0.0066014
4921507P07Rik	0.012214	0.0281006	0.0495105	0	0.089217	0.0449262	0.018904	0.00825175	0.0600572	0.0565322	0.0191644	0.0203867	0	0.0142917	0.0210045	0.0472358	0.0256371	0.0319914	0.0636732	0.013161	0.00753421	0.0288811	0.0235764	0.0184839	0.017548	0.0425407	0.0897014	0.0738199	0	0	0.0277259	0.0218889	0	0.0223596	0.0281958	0.0288811	0.0253204	0.0509667	0	0	0.0187337	0.0810172	0.0266595	0.033007	0.0414151	0.0424376	0.0352448	0.0231049	0.0500714
4921511C10Rik	0	0	0	0	0	0	0	0	0	0.0074532	0	0.0203867	0	0	0	0	0	0	0	0.00438701	0	0.00962704	0	0	0	0	0.00815467	0	0	0	0	0	0	0	0	0	0	0	0	0	0	0	0	0	0	0	0	0	0
4921511C20Rik	0	0	0	0	0	0.00320901	0	0	0	0	0	0	0	0	0.00525112	0	0.00459038	0	0	0	0	0	0	0	0	0	0.00815467	0	0	0	0	0	0	0	0	0	0	0	0	0	0	0	0	0	0	0	0	0	0
4921514A10Rik	0.00305351	0	0.0165035	0.0231049	0.00686284	0.00320901	0.00630134	0.0247553	0	0.0074532	0.00686284	0.0203867	0.0157533	0.0142917	0.0262556	0.024464	0.00918076	0.0106638	0	0.013161	0.0150684	0.00962704	0.00471529	0.00924196	0.00877401	0.007617	0.0163093	0	0.00936685	0	0.00732408	0	0.0407734	0.00447192	0.0046993	0	0.00949517	0.0101933	0	0	0.00936685	0.0180038	0	0.0220047	0	0	0	0.0231049	0.0066014
4921516A02Rik	0.00916054	0.00936685	0	0	0.0137257	0.00320901	0	0	0.00456018	0	0.0102943	0	0	0.00714585	0.0105022	0.00815467	0.0275423	0	0	0.00695324	0	0	0	0	0.00877401	0	0.0292342	0	0	0	0.00462098	0	0	0	0.00704895	0	0.00633011	0.0182714	0	0	0	0	0	0	0.0115525	0	0.0234965	0	0.0066014
4921517D16Rik	0.00305351	0.00936685	0	0.0231049	0	0	0	0.00825175	0	0.0074532	0.0102943	0	0	0.0142917	0	0.00407734	0	0	0	0.00877401	0.0150684	0	0.00943057	0.00924196	0	0	0.00815467	0.0154033	0.00936685	0	0.00924196	0	0	0.00894383	0	0	0.00633011	0	0	0	0	0	0	0	0	0	0.00587413	0	0
4921522P10Rik	0	0	0	0	0	0.00320901	0	0	0.00456018	0	0	0	0	0	0	0.00407734	0	0	0	0	0	0	0	0	0	0	0	0	0.00936685	0	0	0	0	0	0.00234965	0	0	0	0	0	0	0	0	0	0	0	0	0	0
4921523L03Rik	0.0183211	0	0.0261574	0	0.024603	0.00641803	0.011295	0.0123776	0.0117879	0	0.0171571	0	0.0157533	0.00714585	0	0.00815467	0.00918076	0.0213276	0.00505947	0.00438701	0.00753421	0.0288811	0.00943057	0.00924196	0.0226805	0	0	0.00770164	0.00936685	0	0.00732408	0	0	0.0115597	0.00704895	0	0	0.0203867	0.127921	0	0.00936685	0	0	0.0110023	0.0183102	0	0	0	0.0132028
4921524J17Rik	0.996289	0.967695	0.961302	0.83994	0.887561	1.0587	1.01937	0.939569	0.810372	0.715982	1.02712	0.588983	0.876885	0.931309	1.00516	0.902466	0.962851	0.927755	0.982634	1.01087	0.982319	1.09344	1.0367	1.14755	0.901607	0.70766	0.952767	0.786512	1.29715	0.66065	1.01623	0.988602	0.910871	0.997915	0.931041	0.898242	0.933546	1.00679	0.871789	1.16349	0.847641	0.984231	0.795518	0.963573	0.931113	0.861742	0.915481	0.848842	1.04453
4921528I07Rik	0	0	0	0.0231049	0.00686284	0	0.00315067	0	0	0	0	0	0	0	0	0	0	0	0	0	0	0	0	0	0	0	0	0	0	0	0	0	0	0.00447192	0	0	0	0	0	0	0	0	0.0088865	0	0	0.00707293	0	0	0
4921531C22Rik	0.0463215	0.0749348	0.0495105	0.119451	0.0480399	0.0545533	0.0441094	0.0618881	0.039149	0.0832516	0.0789227	0.113859	0.110273	0.0285834	0.0429012	0.0203867	0.036723	0.102212	0.0535543	0.026322	0.0797493	0.0633937	0.0876334	0.0277259	0.0438701	0.0501577	0.0536982	0.195158	0.065568	0.117035	0.0442919	0.0437777	0.0407734	0.0562789	0.0601157	0.0288811	0.0461622	0.136361	0.0385082	0.173287	0.0796183	0.0270057	0.0585173	0.033007	0.0808672	0.0960855	0.103296	0.0462098	0.116085
4921534H16Rik	0	0	0	0	0	0	0	0	0	0.0074532	0	0	0	0	0	0	0	0	0	0	0	0	0	0	0	0	0	0.00770164	0	0	0	0	0	0	0	0	0	0	0	0	0	0	0	0	0	0	0.0117483	0	0
4921536K21Rik	0	0.0187337	0	0	0.0137257	0	0.0126027	0.0165035	0	0.0074532	0.00343142	0	0	0.00714585	0.0157533	0.00407734	0	0.0213276	0	0	0.0226026	0.0288811	0.00943057	0.00924196	0.00877401	0.007617	0	0.00770164	0.00936685	0.017773	0.00462098	0.00729629	0	0.00447192	0.0046993	0.0115525	0.0189903	0.00509667	0	0	0.00468343	0	0	0	0.0115525	0.00707293	0.0117483	0	0.0066014
4921539E11Rik	0	0	0	0	0	0	0	0	0	0	0	0	0	0	0	0	0.00459038	0	0	0	0	0.00962704	0	0	0	0	0.00815467	0	0	0	0	0	0	0	0	0	0.00316506	0	0	0	0.00468343	0	0	0	0	0	0.00587413	0	0
4930401A07Rik	0	0	0	0	0	0	0	0	0	0	0	0	0	0	0	0	0	0	0	0	0	0	0.00471529	0.00924196	0	0	0	0	0	0	0	0	0	0	0.00234965	0.00577623	0	0	0	0	0	0.00900191	0	0	0	0	0	0	0
4930401G09Rik	0	0.00936685	0.0165035	0.0462098	0	0.00320901	0.00315067	0	0	0	0	0	0	0	0	0.00815467	0.00459038	0	0	0	0.00753421	0	0	0.00924196	0	0	0	0	0.00936685	0.017773	0.00462098	0	0	0	0.00234965	0	0	0	0	0	0	0	0	0	0	0	0	0	0
4930402H24Rik	0.121911	0.171787	0.141682	0.648336	0.13156	0.170927	0.105043	0.138257	0.127342	0.332446	0.291744	0.394275	0.0787667	0.144131	0.100663	0.110781	0.175994	0.19376	0.130306	0.103467	0.109886	0.151673	0.104538	0.121716	0.127969	0.235554	0.216179	0.423741	0.127248	0.290408	0.128255	0.110684	0.163093	0.128589	0.144527	0.107351	0.137173	0.311205	0.176559	0.173287	0.065568	0.188202	0.157779	0.179777	0.161734	0.114369	0.132667	0.115525	0.129288
4930403P22Rik	0.012214	0.0187337	0	0	0	0.00962704	0.00630134	0.00825175	0.00456018	0.0074532	0.00686284	0	0.0157533	0.0142917	0.0105022	0	0.00918076	0.0106638	0.00505947	0	0	0	0.00943057	0	0.00877401	0.015234	0.0163093	0.00770164	0.00936685	0.017773	0.0119451	0.00729629	0	0	0.00939861	0	0.00949517	0.0101933	0	0	0	0.00900191	0.0088865	0	0.0115525	0.00707293	0.0117483	0.0231049	0
4930404A12Rik	0	0	0	0	0	0	0	0	0	0	0	0	0	0	0	0	0	0	0	0	0	0	0	0	0	0	0	0	0	0	0	0	0	0	0	0	0	0	0.0385082	0	0	0	0.0088865	0	0	0	0	0	0
4930404I05Rik	0	0	0	0	0	0	0	0.00412588	0	0	0	0	0	0	0.00525112	0	0.0137711	0	0	0	0	0	0	0	0	0	0	0	0.00936685	0	0	0	0	0.00447192	0	0.0115525	0.00316506	0	0	0	0.00468343	0.00900191	0	0.0110023	0	0	0	0	0
4930404N11Rik	0.0201073	0.0281006	0.0495105	0.0462098	0.0549027	0.0288811	0.0270484	0.0618881	0.0228009	0.0074532	0.0411771	0	0	0.0285834	0.0293273	0.0186944	0.0183615	0.0426552	0.0252973	0.026322	0.00753421	0.0288811	0.0451958	0.0462098	0.00877401	0.045702	0.102626	0.0462098	0.00936685	0.0992616	0.0462098	0.0218889	0	0.0339193	0.0211469	0.0207076	0.0221554	0.0254834	0	0.173287	0.0140503	0.0142677	0.0444325	0.033007	0.0346574	0.0212188	0.0293706	0.0462098	0.0132028
4930405A21Rik	0.00610702	0.0281006	0.0165035	0	0.0205885	0.00962704	0.0157533	0.00412588	0.0163481	0.0298128	0.0157329	0.0407734	0.0315067	0	0.00525112	0.012232	0.0183615	0	0.00505947	0.00438701	0.00753421	0	0.0282917	0	0.00877401	0.015234	0.0163093	0.0154033	0.00936685	0.017773	0.030429	0.0218889	0	0.00894383	0.00234965	0.0115525	0.00633011	0.01529	0	0	0	0	0.0266595	0.0220047	0.0231049	0.0141459	0.0176224	0.0231049	0
4930405J17Rik	0	0	0	0	0	0	0	0	0	0	0.0088701	0.0203867	0	0	0	0	0	0	0	0	0	0	0	0	0	0	0	0	0	0	0	0	0	0	0	0	0	0	0	0	0	0	0	0	0	0	0	0	0
4930405O22Rik	0	0	0	0	0	0.00320901	0.00315067	0	0	0	0.00686284	0.0203867	0	0	0	0	0	0	0.00505947	0	0	0	0	0	0	0.007617	0	0	0	0	0	0	0	0	0	0	0	0.00509667	0	0	0	0	0	0	0	0	0	0.0231049	0
4930407I10Rik	0	0	0	0	0.00686284	0	0	0	0.00456018	0	0	0	0	0	0	0	0	0	0.00505947	0.00438701	0	0	0	0	0	0	0	0	0	0	0	0	0	0	0	0	0	0	0	0	0	0	0	0	0	0	0	0	0
4930408O17Rik	0	0	0	0	0	0	0	0	0	0	0	0	0	0	0	0	0	0	0	0	0	0	0	0	0	0	0	0.0353117	0	0	0	0	0	0	0	0	0	0	0	0	0	0	0	0	0	0	0.00587413	0	0
4930412C18Rik	0.00305351	0	0	0	0.0137257	0.00962704	0.00630134	0	0.00456018	0.0074532	0.00686284	0	0.0315067	0	0.00525112	0.0105398	0.00459038	0	0.0101189	0	0.0150684	0	0.00471529	0	0.00877401	0.015234	0	0	0	0	0	0.00729629	0	0.00447192	0.0046993	0.0115525	0	0.00509667	0	0	0.00936685	0.0180038	0.0088865	0	0.0346574	0.00707293	0	0	0
4930412L05Rik	0.00305351	0	0	0	0	0	0.00315067	0	0.00456018	0	0	0	0	0	0.0105022	0	0	0	0	0	0.00753421	0.00962704	0.00471529	0	0	0	0	0	0	0	0	0	0	0.00447192	0.00234965	0	0.00316506	0	0	0	0.00468343	0	0	0	0.0231049	0	0.0117483	0	0
4930412M03Rik	0	0	0	0	0.00686284	0.00320901	0.00315067	0.00412588	0	0	0	0	0	0	0	0.012232	0	0.0106638	0.00505947	0	0	0	0.00471529	0.00924196	0	0	0	0.0154033	0	0	0	0	0	0	0.0046993	0.00577623	0.00633011	0	0	0	0.00468343	0	0	0	0	0.0141459	0	0	0.0066014
4930413F20Rik	0	0	0	0.0231049	0	0	0	0	0	0	0	0	0	0	0	0	0	0	0	0	0	0	0	0	0.00877401	0	0	0	0	0	0	0	0	0	0	0	0	0	0	0	0	0	0	0	0	0	0.00587413	0	0
4930415O20Rik	0	0.00936685	0	0	0.0314659	0.00641803	0.00945201	0.0123776	0.0182407	0.0074532	0.0137257	0	0	0.00714585	0	0	0.00459038	0.0213276	0	0.0113402	0	0.00962704	0.0188611	0	0.00877401	0	0	0	0.00936685	0.017773	0.00462098	0.00729629	0	0.0134158	0.00939861	0.00577623	0.0126602	0	0	0.173287	0.0121065	0.0180038	0.035546	0.0220047	0.0462098	0.0141459	0.0386809	0.0231049	0.0198042
4930417O22Rik	0	0	0	0	0.00686284	0.00320901	0	0	0	0	0	0	0	0	0	0	0	0	0	0.00438701	0	0	0	0	0	0	0	0.127731	0	0	0	0	0	0	0	0	0	0	0	0	0	0	0	0	0	0	0	0	0
4930422M22Rik	0	0	0	0	0	0	0	0	0	0	0	0	0	0	0	0	0	0	0	0	0	0	0	0	0	0	0	0	0	0	0.00462098	0.00729629	0	0.00447192	0	0	0	0	0	0	0	0	0	0	0	0	0	0	0
4930423D22Rik	0	0.00936685	0	0	0.0137257	0.00962704	0.00315067	0.00412588	0.00456018	0	0.00343142	0	0	0.0214375	0.0157533	0.00407734	0.00918076	0.0213276	0.0101189	0.0113402	0.00753421	0	0.00943057	0	0	0	0	0	0	0.017773	0	0	0	0	0.00939861	0.00577623	0.00633011	0.01529	0	0	0.00936685	0.0180038	0.0088865	0.0110023	0	0.0536479	0.127791	0	0.0198042
4930425L21Rik	0	0	0	0	0	0	0.00315067	0	0	0	0	0	0	0	0	0	0	0	0	0.00877401	0.00753421	0	0	0	0	0	0.00815467	0	0.00936685	0	0.00924196	0	0	0	0.0046993	0	0	0.00509667	0	0	0	0	0.0266595	0.0110023	0	0	0	0	0
4930426D05Rik	0	0	0	0	0	0	0	0	0.00456018	0	0.00686284	0	0	0	0	0	0	0	0.00505947	0	0	0	0	0	0	0	0	0	0	0	0	0	0	0.00447192	0	0	0	0.0101933	0	0	0	0	0	0	0	0	0	0	0.0066014
4930426I24Rik	0.012214	0.00936685	0.0165035	0	0.00686284	0.0128361	0.00630134	0.0123776	0.0136805	0.0074532	0.0137257	0	0.0157533	0.0142917	0.0105022	0.0163093	0.0137711	0.0213276	0	0.00877401	0.00753421	0.00962704	0.00471529	0.00924196	0	0.007617	0.00815467	0.0308065	0.0374674	0.071092	0.0184839	0.00729629	0	0.0178877	0.0046993	0.0115525	0.00633011	0.0101933	0	0	0.0140503	0.0180038	0.0266595	0	0.0115525	0.00707293	0.00587413	0.0231049	0.0132028
4930429F24Rik	0	0	0	0	0.0137257	0.00962704	0.00630134	0.00412588	0.00456018	0.0074532	0	0.0203867	0	0	0.0105022	0	0.00459038	0	0.0101189	0	0	0	0	0.00924196	0	0	0.0163093	0.0231049	0.0187337	0	0	0.00729629	0	0	0.00842341	0	0	0.0101933	0	0	0.00742306	0	0	0	0	0.00707293	0.0117483	0	0
4930429H19Rik	0	0	0	0	0.00686284	0	0	0	0	0.0074532	0	0	0	0	0	0	0	0	0	0	0	0	0	0	0	0	0	0	0	0	0	0	0	0	0	0	0	0	0	0	0	0	0	0	0	0	0	0	0
4930430F08Rik	0.34874	0.427003	0.418196	0.281185	0.414753	0.420748	0.464441	0.417886	0.552497	0.279568	0.310908	0.32119	0.389972	0.496718	0.387707	0.424129	0.481232	0.464799	0.388438	0.350638	0.447091	0.337686	0.437027	0.42288	0.488234	0.387322	0.184173	0.297897	0.428427	0.38967	0.509893	0.414791	0.333115	0.458846	0.412924	0.395294	0.422338	0.325721	0.292083	0	0.458639	0.454699	0.454054	0.370555	0.418946	0.347787	0.395678	0.583738	0.548552
4930431P03Rik	0	0	0	0	0	0.00320901	0.00315067	0.00825175	0	0	0.00686284	0	0	0	0	0	0.00459038	0	0	0.00438701	0	0	0.00471529	0	0	0	0	0	0	0	0.00462098	0	0	0	0	0.00577623	0.00316506	0	0	0	0	0	0	0.0110023	0	0	0.0117483	0	0
4930431P22Rik	0	0	0	0	0	0	0	0	0	0	0.00343142	0	0	0	0	0	0.00459038	0	0.00801907	0	0	0	0.00471529	0.00924196	0.00877401	0	0	0	0	0	0	0	0	0	0	0	0	0.01529	0	0	0	0	0	0	0	0	0	0	0
4930432B10Rik	0	0	0	0	0	0.00320901	0	0	0	0	0	0	0	0.00714585	0	0.00407734	0	0	0.00505947	0	0	0	0	0	0	0	0	0	0.00936685	0	0	0.00729629	0	0.00447192	0.0046993	0	0.00633011	0	0	0	0.00468343	0.0180038	0	0	0	0	0	0	0
4930432K21Rik	0.0292678	0.0187337	0.033007	0.0462098	0.0754913	0.0160451	0.0540968	0.0247553	0.0273611	0.086345	0.0225958	0.0203867	0.0787667	0.0214375	0.0315067	0.0407734	0.0577697	0	0.0434353	0.0533896	0.0678079	0.0385082	0.0471529	0.0369678	0.00877401	0.007617	0.0163093	0.0629218	0.0468343	0.0814886	0.056237	0.0115643	0	0.0491911	0.0520916	0.0288811	0.0398321	0.0254834	0.115525	0	0.0187337	0.0270057	0.0496308	0.039443	0.0115525	0.0565834	0.0386809	0.0693147	0.033007
4930432L08Rik	0	0	0	0	0	0	0	0.00412588	0	0	0	0	0	0	0	0	0	0	0	0	0.00753421	0	0	0	0	0	0	0	0	0	0	0	0	0	0.00234965	0	0	0	0	0	0	0	0	0	0	0	0	0	0
4930433N12Rik	0.00305351	0	0	0	0.00686284	0.00320901	0.00630134	0.00825175	0	0.0074532	0.00343142	0	0	0.0214375	0	0.00815467	0	0	0	0	0	0	0	0	0	0	0	0	0	0	0	0	0	0	0.00234965	0	0.00316506	0	0	0	0	0.00900191	0.0088865	0	0	0	0	0	0
4930434B07Rik	0	0	0	0	0	0	0	0	0	0	0	0	0	0	0	0	0	0	0	0	0	0	0	0	0	0.007617	0.00815467	0.00770164	0	0	0.00462098	0	0	0	0	0	0	0	0	0	0	0	0	0	0	0	0	0	0
4930438A08Rik	0	0	0	0	0	0.00320901	0	0	0	0	0	0	0	0	0	0.00407734	0	0	0	0	0	0	0	0	0	0	0	0	0	0	0	0	0	0.00447192	0	0	0	0.00509667	0	0	0	0	0	0	0	0	0	0	0
4930439D14Rik	0	0	0	0	0	0	0	0	0.00456018	0	0.00343142	0	0	0.0142917	0.0105022	0.00407734	0.00459038	0.0106638	0	0	0	0	0	0.00924196	0	0	0	0	0	0.017773	0	0.00729629	0	0.00894383	0	0	0.00316506	0	0	0	0	0	0	0.0110023	0	0	0	0	0
4930443O20Rik	0	0.00936685	0	0	0.00686284	0	0	0	0.00456018	0	0.00343142	0.0203867	0	0	0	0	0	0	0	0	0	0	0	0	0	0	0	0	0	0	0	0	0	0	0	0	0	0	0	0	0	0	0	0	0	0	0	0	0.0066014
4930444E06Rik	0	0	0	0.0231049	0.00686284	0	0.00315067	0	0.00456018	0	0.00343142	0	0	0.0142917	0.00525112	0.00407734	0	0	0.00505947	0	0	0	0.00943057	0	0	0	0	0	0	0.017773	0	0	0	0	0.0046993	0.00577623	0.00633011	0	0.0385082	0	0.00468343	0.00900191	0	0	0	0	0.00587413	0	0
4930444G20Rik	0	0	0	0	0.00686284	0	0	0	0.00456018	0	0	0	0	0	0	0	0	0	0	0	0	0	0.00471529	0	0.026322	0	0	0	0	0	0.00462098	0	0	0.00447192	0	0	0	0	0	0	0.00468343	0	0	0	0	0	0	0	0
4930444P10Rik	0.00305351	0	0	0	0	0.00320901	0	0	0.00456018	0	0	0	0	0	0	0	0	0	0.00505947	0.00877401	0.00753421	0.00962704	0.0141459	0	0.00877401	0.007617	0.0652374	0	0.00936685	0.017773	0	0	0	0.00447192	0	0	0.00316506	0	0.0385082	0	0	0.00900191	0	0	0	0	0	0	0
4930445E18Rik	0	0	0	0	0	0.00320901	0.00315067	0	0.00456018	0	0	0	0	0	0.0105022	0	0	0	0	0.00438701	0	0	0	0	0	0	0	0	0	0	0	0	0	0.00894383	0.00234965	0	0	0	0	0	0	0	0	0	0	0	0	0	0
4930445N18Rik	0	0	0	0	0	0	0	0.00825175	0	0	0.00343142	0.0203867	0	0.00714585	0	0	0	0	0	0.00438701	0	0	0	0	0	0	0	0	0	0	0	0	0.0407734	0	0	0	0.00316506	0	0	0	0	0	0	0	0	0	0.00587413	0	0
4930447C04Rik	0.672278	1.16537	0.93461	0.638332	0.725007	0.906403	0.809179	0.821038	0.554204	0.817016	0.829225	1.00628	0.705533	0.724615	0.810163	1.25987	0.762126	0.70646	1.09535	0.980989	0.92558	0.77679	0.812788	0.804418	0.634582	0.69305	0.789952	0.3915	0.932466	0.527497	0.782075	0.85739	1.02368	0.876462	0.778106	0.792771	0.762043	0.980383	0.911172	0.677013	0.692942	1.18905	0.964524	1.10994	0.842764	0.797223	0.724141	0.852433	1.23037
4930447F24Rik	0	0	0	0	0.00686284	0	0.00315067	0	0.00456018	0	0	0	0.0157533	0	0.0157533	0.0251569	0.00459038	0	0	0.013161	0	0	0	0.00924196	0.00877401	0	0	0	0	0	0	0.00729629	0	0.00447192	0.0046993	0	0	0	0.0385082	0	0	0	0	0	0	0	0.0117483	0	0
4930447K03Rik	0	0.00936685	0	0	0	0	0	0.00825175	0.00912036	0	0	0	0	0	0.0105022	0	0	0	0.0202379	0	0.00753421	0	0	0.00924196	0	0.015234	0	0	0.00936685	0	0	0.0145926	0	0.00447192	0.00234965	0	0	0.00509667	0	0	0	0	0	0	0	0.00707293	0	0	0
4930448A20Rik	0	0	0	0	0	0.00320901	0	0	0	0	0	0	0	0	0	0	0.00459038	0.0106638	0	0	0	0	0	0	0	0	0.00815467	0	0	0	0	0	0	0.00447192	0	0	0	0	0	0	0	0	0	0	0	0.124377	0.0328068	0	0
4930448D08Rik	0	0	0	0	0	0	0.00315067	0	0	0	0	0	0	0	0.00525112	0	0	0	0	0	0	0	0	0	0	0	0	0	0	0	0	0	0	0	0	0	0	0	0	0	0	0	0	0	0	0.00707293	0	0.0231049	0
4930448E22Rik	0.00610702	0.0281006	0.0165035	0	0.0411771	0.0224631	0.020747	0.0165035	0.0136805	0.0074532	0.0102943	0	0	0.0142917	0.0157533	0	0.00918076	0.0106638	0.0151784	0.013161	0.00753421	0.00962704	0.00943057	0.00924196	0.00877401	0	0.00815467	0	0	0.053319	0.0442919	0	0	0.0178877	0.024871	0.0115525	0.0284855	0.0131747	0	0	0.00936685	0	0.0266595	0.0220047	0.0231049	0.00707293	0.0117483	0	0.0066014
4930449E01Rik	0	0	0	0	0	0	0	0	0	0.0074532	0	0.0203867	0	0	0	0	0	0	0	0	0	0	0	0	0	0	0	0	0	0	0	0.00729629	0	0	0	0	0	0	0	0	0	0	0	0	0	0.00707293	0.00587413	0	0
4930452B06Rik	0.191682	0.302923	0.286168	0.138629	0.198506	0.223603	0.313882	0.230429	0.233001	0.142877	0.168986	0.101933	0.241654	0.280579	0.280591	0.22464	0.268237	0.176859	0.170782	0.156111	0.209111	0.217426	0.218506	0.320508	0.176971	0.212703	0.118936	0.0584166	0.242834	0.170354	0.234892	0.302867	0.438513	0.27473	0.247159	0.182989	0.227408	0.135112	0.237593	0.346574	0.245574	0.181568	0.28068	0.198042	0.234975	0.0919481	0.18753	0.142556	0.0709973
4930453C13Rik	0.00305351	0	0	0	0	0	0	0	0	0	0	0	0	0	0	0.00407734	0	0	0	0	0	0	0.00471529	0	0	0	0	0.00770164	0	0	0	0	0	0	0	0	0.00316506	0	0	0	0	0	0	0	0	0	0	0	0
4930453H23Rik	0	0	0.0165035	0	0.0205885	0	0	0	0.00456018	0.0149064	0.0102943	0	0.0157533	0	0.0262556	0.00407734	0	0	0	0.00438701	0.00753421	0	0	0.0146482	0	0	0	0	0	0	0.0138629	0.00729629	0	0.00894383	0.00939861	0	0	0	0	0	0.00936685	0.00900191	0	0	0	0.0141459	0.00587413	0.0231049	0.0066014
4930453N24Rik	1.1488	1.05852	1.19104	1.07721	1.1178	1.11949	1.19179	1.23787	1.18309	0.978225	1.10685	1.06564	1.09322	1.18382	1.18864	0.991305	1.09792	1.03901	1.21216	1.11098	1.19035	1.24213	1.22048	1.1957	1.00635	1.07249	1.11373	1.18595	1.0188	0.918532	1.18188	1.03396	1.21874	1.20952	1.14171	1.17949	1.20247	1.21705	0.907586	0.575646	1.17884	1.19454	1.15225	1.15298	1.25343	1.10006	1.03292	1.0956	1.11517
4930455B14Rik	0.00305351	0	0	0	0.00686284	0.00641803	0.00315067	0.00412588	0.0228009	0.0074532	0.0102943	0.0203867	0.0157533	0.0214375	0.00525112	0.00407734	0.00459038	0.0106638	0	0.013161	0.00753421	0	0.00471529	0	0.00877401	0	0.00815467	0	0.00936685	0	0.0138629	0	0	0.00447192	0.00704895	0.00577623	0.0158253	0	0	0	0	0	0.017773	0	0	0.0141459	0	0.0231049	0
4930455C13Rik	0	0	0	0	0.00686284	0	0	0	0	0	0	0	0	0	0	0	0	0	0	0	0.00753421	0	0	0	0	0.007617	0	0	0	0	0	0	0	0.00447192	0	0	0	0.00509667	0	0	0.00468343	0	0	0	0	0	0	0	0
4930455G09Rik	0	0	0	0	0.00686284	0	0	0	0	0	0.0088701	0	0	0.00714585	0	0.00407734	0	0	0	0	0	0	0	0	0.00877401	0	0	0	0	0	0	0	0	0.00447192	0	0.00577623	0	0.0518328	0	0	0	0	0.0088865	0	0	0	0	0	0
4930455M05Rik	0.00305351	0	0.033007	0	0	0.00320901	0.00630134	0.0123776	0	0	0.00343142	0	0.0157533	0	0.0105022	0.00815467	0.00459038	0	0	0	0.00753421	0	0.00943057	0	0	0	0	0.00770164	0.00936685	0.017773	0.00462098	0	0	0.00447192	0.00234965	0.00577623	0.00316506	0	0	0	0.00468343	0	0	0	0	0.00707293	0	0	0
4930458D05Rik	0	0	0	0	0	0	0	0	0	0	0	0	0	0	0	0.00815467	0	0	0	0.00438701	0.00753421	0	0	0	0	0	0	0.0308065	0	0	0	0	0	0	0	0	0	0.00807803	0	0	0	0	0	0	0	0	0	0	0.0066014
4930461C15Rik	0	0	0	0	0	0	0	0	0	0	0	0	0	0	0	0	0	0	0	0	0	0	0	0	0	0	0	0.00770164	0	0	0	0	0	0	0	0	0	0	0	0	0	0	0	0	0	0	0	0	0
4930461G14Rik	0.116038	0.198296	0.326025	0.279034	0.335247	0.204108	0.355083	0.242806	0.304503	0.197583	0.289736	0.239643	0.217512	0.219232	0.235416	0.272189	0.216963	0.10845	0.201056	0.189057	0.277498	0.159664	0.224823	0.283375	0.25297	0.17132	0.0666231	0.112328	0.203775	0.269615	0.276806	0.224396	0.240844	0.259795	0.251282	0.162282	0.266464	0.195797	0.204938	0	0.19545	0.206206	0.228871	0.272362	0.144312	0	0.0749239	0.17525	0.151336
4930463O16Rik	0	0	0	0	0	0	0	0	0	0	0	0	0	0	0	0.00815467	0.00459038	0	0	0	0.00753421	0.00962704	0	0	0	0	0.00815467	0	0	0	0.00462098	0.00729629	0	0	0	0	0	0.00509667	0	0	0.00936685	0.00900191	0.0088865	0	0.0231049	0	0	0	0
4930467D21Rik	0	0	0	0	0	0	0	0.00412588	0	0.0074532	0	0	0	0	0.00525112	0.00407734	0	0	0	0	0	0	0	0	0	0	0	0	0	0	0	0	0	0	0	0	0.00316506	0	0	0	0	0	0	0	0	0	0	0	0
4930467K11Rik	0	0	0	0	0	0	0	0	0	0	0	0	0	0	0.00525112	0	0	0	0	0	0	0	0	0	0	0	0.00815467	0	0	0	0	0.00729629	0	0.00447192	0	0	0	0	0	0	0	0	0	0	0	0	0	0	0
4930469K13Rik	0	0	0	0	0	0	0	0	0	0	0	0	0	0.00714585	0	0	0	0	0	0	0	0	0	0	0	0	0	0	0	0	0.00462098	0	0	0.00447192	0	0	0	0	0	0	0	0	0	0	0	0.00707293	0	0	0
4930470G03Rik	0.00610702	0	0.033007	0	0	0.0211312	0.00945201	0.0123776	0.00912036	0.0149064	0.0274514	0	0	0.0142917	0.00525112	0.0203867	0.0137711	0.0106638	0.0202379	0.00438701	0.00753421	0	0.0141459	0.0184839	0.00877401	0	0.00815467	0.00770164	0	0.035546	0.00924196	0	0	0.00894383	0.0046993	0.0231049	0.00633011	0.0203867	0	0	0.00468343	0.00900191	0	0.0110023	0	0.0212188	0.0117483	0.0231049	0.0264056
4930471C06Rik	0.00305351	0	0	0	0.00686284	0	0	0	0	0	0	0	0	0	0	0	0	0	0	0	0	0	0	0	0	0	0	0	0	0	0	0	0	0	0	0	0	0	0	0	0	0	0	0	0	0	0	0	0.0132028
4930471E19Rik	0	0	0	0	0	0	0	0	0.00456018	0	0.00343142	0	0	0	0	0	0	0	0	0	0	0.00962704	0.00471529	0	0	0	0	0	0	0	0	0	0	0.00447192	0	0	0.00633011	0	0	0	0.00468343	0	0.0088865	0	0	0	0	0	0
4930471G03Rik	0.012214	0	0	0	0	0	0	0	0.00456018	0.0074532	0.0102943	0.0203867	0	0	0.00525112	0.00815467	0	0	0	0	0	0	0	0	0	0.007617	0.0326187	0	0	0	0	0	0	0	0	0	0	0	0	0	0.00468343	0	0	0	0	0	0.00587413	0	0.0066014
4930473A02Rik	0	0.00936685	0	0	0	0	0	0	0	0	0	0	0	0	0	0	0	0	0	0	0	0	0	0	0	0	0	0	0	0	0	0	0	0	0	0	0	0	0	0	0.00468343	0	0	0	0	0	0	0	0
4930473H19Rik	0	0.00936685	0	0	0	0	0	0	0.0136805	0	0	0	0	0	0	0	0	0	0	0	0	0	0	0	0.00877401	0	0	0	0	0.017773	0	0	0	0.00447192	0.00234965	0	0	0	0	0	0	0	0	0	0	0	0	0	0
4930474H06Rik	0	0	0	0	0	0	0	0	0	0	0.00343142	0	0	0	0	0	0	0	0	0.00438701	0	0	0	0	0	0	0	0	0	0	0	0	0	0	0.00234965	0.00577623	0	0.00509667	0	0	0	0	0	0	0	0	0.00587413	0	0
4930477E14Rik	0	0	0	0	0	0.0128361	0	0	0	0	0	0	0	0	0	0	0	0	0.00505947	0	0	0.00962704	0	0	0	0	0	0	0	0	0.00462098	0.00729629	0	0.00447192	0	0	0	0	0	0	0	0	0	0.0110023	0	0	0	0	0
4930477N07Rik	0	0	0	0.0231049	0.00686284	0.00320901	0	0.00412588	0	0	0	0	0	0	0.00525112	0.024464	0	0	0.0101189	0.021935	0.00753421	0.00962704	0	0.00924196	0.00877401	0	0	0	0.0187337	0.017773	0	0	0	0.00447192	0.00234965	0.00577623	0	0	0	0	0	0	0	0	0	0.00707293	0	0	0
4930478L05Rik	0	0	0	0	0	0.00320901	0	0	0.00456018	0	0	0	0	0	0	0	0	0	0	0.00438701	0	0	0.00471529	0	0	0	0	0	0	0	0.00462098	0	0	0.00447192	0.0046993	0.0115525	0	0	0	0	0	0	0	0	0	0	0	0	0
4930479D17Rik	0	0	0	0	0	0	0.00315067	0	0.00456018	0	0	0	0	0.00714585	0	0	0	0	0	0	0	0	0.00471529	0	0	0	0	0	0	0	0	0	0	0	0	0.00577623	0	0	0	0	0	0	0.0088865	0	0	0	0	0	0
4930481A15Rik	0.00305351	0	0	0	0.00686284	0.00641803	0	0.0123776	0	0.0074532	0.00686284	0	0	0	0	0.00407734	0	0.0106638	0.00505947	0	0	0	0.00471529	0	0	0	0	0.0154033	0	0	0.00924196	0	0	0.00447192	0.00704895	0	0	0	0	0	0.00468343	0.00900191	0	0	0	0.00707293	0.00587413	0.0231049	0.0198042
4930481B07Rik	0.0152676	0.0187337	0	0	0.00686284	0.0288811	0.00945201	0.0288811	0.0228009	0.0074532	0.00343142	0.0203867	0.0157533	0.0142917	0.0105022	0.00815467	0.00459038	0.0106638	0.0101189	0.013161	0.0226026	0.00962704	0.0121888	0.00924196	0	0.022851	0.0163093	0	0.0281006	0.017773	0.00462098	0.00729629	0	0.0223596	0.00939861	0.00577623	0.00949517	0.00509667	0	0.173287	0.00468343	0.00900191	0.0088865	0.0110023	0.0115525	0.00707293	0.0234965	0	0.0198042
4930483J18Rik	0	0	0	0	0.00686284	0	0	0	0	0.0447192	0.0137257	0.0203867	0	0	0	0.012232	0.00918076	0	0.0101189	0.00695324	0	0	0	0	0	0	0.0163093	0	0	0	0	0	0	0	0	0	0.00316506	0	0.0385082	0	0	0.00900191	0	0	0	0	0.00587413	0	0
4930486L24Rik	0.00305351	0.0187337	0.0165035	0	0.0343142	0.00320901	0.00315067	0.00412588	0.00456018	0.0149064	0.0137257	0	0.0157533	0.0285834	0.0105022	0.012232	0.00459038	0.0213276	0.00505947	0.00438701	0.0226026	0	0.00471529	0.00924196	0	0.015234	0	0.0154033	0.0187337	0.035546	0.0138629	0.00729629	0	0.0249755	0.0117483	0.00577623	0.00949517	0.00509667	0	0.173287	0.0121065	0.00900191	0.0266595	0	0.0115525	0	0.0117483	0	0.0198042
4930488L21Rik	0	0	0	0	0	0	0	0	0	0	0.00543867	0.0203867	0	0	0	0	0	0	0	0	0	0	0	0	0	0	0	0.0154033	0	0	0	0	0	0	0	0	0	0	0	0	0	0	0	0	0	0	0	0	0.0066014
4930500A05Rik	0	0	0	0	0	0.00320901	0	0	0	0	0.00343142	0	0	0	0	0	0	0	0	0	0	0	0	0	0	0	0	0.0154033	0	0	0.00462098	0	0	0	0	0	0	0	0	0	0	0	0	0	0	0	0	0	0.0066014
4930500F10Rik	0.00305351	0	0.033007	0	0.00686284	0.00641803	0	0.00825175	0	0.0074532	0.00343142	0	0	0.00714585	0	0.00407734	0	0	0.00505947	0	0	0	0.00943057	0	0	0	0	0.00770164	0.0187337	0	0	0	0	0	0.0046993	0	0.00316506	0.0203867	0	0	0	0.00900191	0	0.0220047	0	0.00707293	0.00587413	0	0
4930500H12Rik	0.00305351	0	0	0	0	0.00641803	0.00315067	0.00412588	0.00456018	0.0074532	0	0	0.0157533	0.00714585	0.0157533	0	0.00918076	0	0	0.00438701	0.00753421	0	0	0.00924196	0.00877401	0	0	0	0	0.035546	0.00924196	0	0	0.00447192	0.00704895	0.00577623	0	0	0	0	0	0.00900191	0	0	0	0	0	0	0
4930500M09Rik	0	0.00936685	0	0	0	0	0.00315067	0.00412588	0.00456018	0	0.00343142	0	0	0	0	0	0	0	0	0.00438701	0.00753421	0	0	0	0	0.007617	0	0	0	0.017773	0.00462098	0	0	0	0	0	0	0	0	0	0	0	0	0	0	0	0.00587413	0	0
4930502E09Rik	0	0.00936685	0.0165035	0	0.0205885	0.00641803	0.00315067	0.00412588	0	0.0074532	0.0137257	0	0.0157533	0.00714585	0	0.00815467	0.00918076	0	0.0101189	0	0	0	0.00943057	0.00924196	0	0	0.00815467	0	0	0	0.00462098	0	0	0.00447192	0.0046993	0	0.0158253	0	0	0	0	0.00900191	0	0.0110023	0	0	0.0176224	0	0.0198042
4930502E18Rik	0	0	0	0	0	0	0	0	0	0.0074532	0	0	0	0	0	0	0	0	0.00505947	0	0	0	0	0	0	0	0	0.00770164	0	0	0	0	0	0	0	0	0	0	0	0	0	0	0	0	0	0	0	0	0
4930503E14Rik	0	0	0	0	0	0	0.00315067	0	0	0	0.00686284	0	0	0	0	0.00407734	0	0	0.00505947	0	0.00753421	0	0	0	0	0	0	0	0	0	0	0	0	0	0	0	0.00316506	0	0	0	0	0	0	0	0	0	0	0	0
4930503L19Rik	0.265491	0.281893	0.276514	0.400636	0.261438	0.309219	0.359778	0.412048	0.332051	0.367179	0.436508	0.467361	0.451519	0.306197	0.317349	0.373816	0.423965	0.425577	0.307007	0.246833	0.345306	0.300814	0.338353	0.4206	0.280109	0.366923	0.310037	0.20286	0.285781	0.290408	0.271158	0.350234	0.251569	0.398015	0.356264	0.361618	0.376952	0.349655	0.292083	0.677013	0.317333	0.357193	0.493302	0.335679	0.45232	0.339639	0.397022	0.321731	0.310891
4930505A04Rik	0	0	0	0	0	0.00320901	0	0.00412588	0.00912036	0	0	0	0	0	0	0	0	0	0	0	0.00753421	0	0	0	0	0	0	0	0	0	0	0	0	0	0.00234965	0	0	0	0	0	0.00468343	0	0	0	0	0	0	0	0
4930505N22Rik	0.00305351	0	0	0	0	0.00320901	0.00315067	0	0	0	0	0	0	0	0	0	0	0	0.00505947	0	0	0	0	0	0	0	0	0	0	0	0	0	0	0	0	0	0	0	0	0	0.00468343	0	0	0	0	0	0	0	0
4930506C21Rik	0.00610702	0	0	0	0.00686284	0.00320901	0.00315067	0	0	0	0	0	0	0.00714585	0.00525112	0.00407734	0.00459038	0	0	0.013161	0	0.0192541	0	0	0	0.007617	0.024464	0	0.00936685	0.017773	0.00462098	0.00729629	0	0	0.0046993	0	0.00949517	0.00509667	0	0	0.00468343	0.00900191	0.0088865	0.0110023	0.0115525	0	0.0117483	0	0
4930507D05Rik	0.012214	0.0187337	0.033007	0.0231049	0.0274514	0.0224631	0.0220547	0.0206294	0.0136805	0	0.0102943	0	0.0407218	0.0184717	0.0315067	0.00815467	0.0183615	0.0319914	0.0151784	0.013161	0.0301368	0.00962704	0.0188611	0.00924196	0.00877401	0	0.00815467	0.00770164	0.0187337	0	0.021187	0.0334532	0	0.00894383	0.00704895	0.0231049	0.0158253	0.0101933	0.0385082	0	0.00468343	0.00900191	0	0.0110023	0.0115525	0.0212188	0.0293706	0	0.0132028
4930509E16Rik	0.0201073	0.0562011	0.0756679	0	0.0549027	0.0468034	0.0716931	0.0536364	0.0136805	0.037266	0.0274514	0	0.0315067	0.0571668	0.0262556	0.024464	0.0413134	0.0488931	0.018138	0.0614181	0.0797493	0	0.0518682	0.051616	0.017548	0.0273067	0.00815467	0.00770164	0.0468343	0.017773	0.060858	0.0583703	0.0815467	0.0447192	0.0473923	0.0404336	0.0411457	0.0203867	0.0385082	0	0.0281006	0.0180038	0.0444325	0.0550117	0.0231049	0.0495105	0.0117483	0	0.053933
4930509G22Rik	0.012214	0.00936685	0	0	0.00686284	0.00320901	0.0126027	0.00412588	0.00456018	0	0.00686284	0.0203867	0	0.00714585	0.0105022	0.0163093	0.00918076	0	0.0151784	0.013161	0	0.00962704	0.00471529	0.00924196	0.00877401	0	0	0	0.00936685	0.017773	0	0.00729629	0	0.00447192	0.0117483	0.0115525	0.00316506	0	0	0	0.00468343	0.0270057	0	0.0110023	0	0.00707293	0.0234965	0.0231049	0.033007
4930509H03Rik	0.0366421	0.0765265	0.0495105	0	0.0903831	0.0596394	0.0504107	0.0560499	0.0273611	0.0534389	0.0500472	0.142707	0.103735	0.0357292	0.0682645	0.0285414	0.0761313	0.0382293	0.0687327	0.021935	0.0904105	0.101902	0.0451958	0.0462098	0.0789661	0.030468	0.0781622	0.100121	0.0749348	0.053319	0.0462098	0.0918235	0.0407734	0.0581349	0.046993	0.0462098	0.0619875	0.0641414	0.0770164	0	0.0355236	0.0270057	0.0674038	0.066014	0.0529676	0.0819396	0.0680516	0.0597253	0.0341288
4930511M06Rik	0	0.0187337	0	0	0.00686284	0	0	0	0.00456018	0	0.00343142	0	0	0	0	0	0	0	0	0	0	0	0	0	0	0	0	0	0	0	0	0	0	0	0.00607376	0.00577623	0	0	0	0	0	0.00900191	0	0.0110023	0	0	0	0	0
4930512B01Rik	0	0	0	0	0	0	0	0	0	0	0	0	0	0.00714585	0	0.00407734	0	0	0.00505947	0	0	0	0	0	0	0	0	0.00770164	0	0	0	0	0	0	0.0046993	0	0.00316506	0	0	0	0.00936685	0	0	0	0	0	0	0	0.0066014
4930512J16Rik	0	0	0	0	0.0137257	0	0	0.00412588	0	0	0	0	0	0	0	0	0.00727558	0	0	0	0	0	0	0	0	0	0	0	0	0.017773	0	0	0	0	0	0	0	0	0	0	0	0	0	0	0	0	0	0	0
4930512P04Rik	0	0	0	0	0	0.00320901	0	0	0	0	0	0	0	0	0	0	0	0.0106638	0	0	0	0	0	0	0	0	0	0	0	0	0	0	0	0	0	0	0	0.00509667	0	0	0	0	0.0088865	0	0	0	0	0	0.0066014
4930513N10Rik	0.0341075	0.108515	0.115525	0.152145	0.0960798	0.0692665	0.0554044	0.0453846	0.0919785	0.037266	0.0549027	0.0934722	0.04726	0.0327634	0.0713362	0.0937787	0.0872172	0.0702207	0.0990895	0.0595973	0.0345441	0.0385082	0.0404806	0.0793419	0.0490025	0.0501577	0.0618529	0.413246	0.0468343	0.106638	0.0839629	0.0918235	0.0815467	0.0901982	0.0413185	0.0726936	0.0859943	0.04587	0.0385082	0.173287	0.0636242	0.0630134	0.0940633	0.066014	0.0924196	0.124377	0.100858	0.0693147	0.0896798
4930515G01Rik	0	0.00936685	0	0	0	0.00641803	0	0	0.00456018	0	0.00343142	0.0203867	0.0315067	0.0142917	0	0.00407734	0	0.0106638	0	0.00438701	0.0226026	0	0	0	0	0.007617	0.00815467	0.0154033	0	0	0.00462098	0	0	0.00447192	0.0046993	0.0115525	0	0	0	0	0	0	0	0.0110023	0.0231049	0.0212188	0	0	0.0066014
4930516B21Rik	0	0	0	0	0	0	0.00315067	0	0	0	0.00543867	0	0	0.00714585	0	0	0	0	0	0	0	0	0	0.00924196	0	0	0	0	0	0.017773	0	0	0	0	0	0.00577623	0	0	0	0	0.00468343	0	0	0	0	0	0	0	0
4930517E14Rik	0.0231608	0.00936685	0.0165035	0.0462098	0.0137257	0.0339673	0.0572474	0.0123776	0.00456018	0.0298128	0.02402	0.0203867	0	0.0399093	0.0105022	0.012232	0.0459038	0.0106638	0.0101189	0.017548	0.0226026	0.00962704	0.033007	0.00924196	0	0.007617	0.00815467	0.0122068	0.00936685	0.035546	0.0331321	0.0480458	0	0.0178877	0.0305455	0.0231049	0.0493273	0.00509667	0.0385082	0	0.0234171	0.0180038	0.0088865	0.0220047	0.0529676	0.0141459	0.0176224	0.0693147	0.0132028
4930517L18Rik	0.00305351	0	0.0165035	0.0231049	0.0137257	0.0128361	0.00315067	0.0123776	0.00456018	0	0.00343142	0	0	0.00714585	0	0	0.00918076	0	0.00505947	0	0.0150684	0	0.00471529	0.00924196	0	0	0.00815467	0.00770164	0	0	0.00462098	0	0	0.00894383	0.00607376	0	0.00633011	0	0	0	0.00468343	0.00900191	0.0140848	0	0	0	0	0	0.0066014
4930517O19Rik	0	0	0	0	0	0.00641803	0.00315067	0	0	0	0.00343142	0	0	0	0	0	0	0	0	0.00438701	0	0	0	0	0	0	0	0.00770164	0.00936685	0	0	0.00729629	0	0.00447192	0.00234965	0.0173287	0	0	0	0	0.00468343	0	0	0	0	0	0	0	0
4930519A11Rik	0	0.0148461	0.0165035	0	0.00686284	0	0.00945201	0.00412588	0.00722771	0	0	0	0	0	0	0.00407734	0.00918076	0	0.00505947	0.00438701	0	0	0	0	0	0	0	0	0	0	0	0	0	0	0.0117483	0	0.00316506	0	0.0385082	0	0.00468343	0	0	0	0	0	0	0	0.0066014
4930519P11Rik	0	0	0	0	0	0.00320901	0	0	0	0	0.00343142	0	0	0	0.00525112	0.00407734	0	0.0106638	0	0	0	0	0.00471529	0	0	0.007617	0	0	0	0	0	0	0	0	0	0	0	0	0	0	0	0.00900191	0	0	0	0	0	0	0
4930520M14Rik	0	0	0	0.0231049	0	0	0.00630134	0	0	0	0	0	0	0	0	0	0	0	0	0	0	0	0	0	0	0	0	0	0	0	0.00732408	0	0	0	0	0	0	0	0	0	0	0	0	0	0	0	0	0	0
4930520O04Rik	0.0157864	0.0281006	0.033007	0	0.0343142	0.0288811	0.0383434	0.0288811	0.0345888	0.0149064	0.0171571	0	0.0630134	0.0214375	0.0157533	0.0210795	0.0229519	0.0213276	0.0151784	0.021935	0.0420783	0.00962704	0.0282917	0.0184839	0.0350961	0.030468	0.00815467	0.00770164	0.0187337	0	0.0138629	0.0261569	0	0.0223596	0.0164476	0.0173287	0.0158253	0.00807803	0.0770164	0.173287	0.0187337	0.0270057	0.017773	0.0110023	0.0115525	0.0141459	0.0176224	0.0231049	0.0500714
4930522L14Rik	0.215592	0.284908	0.356228	0.327395	0.177918	0.275555	0.245278	0.283054	0.255027	0.230489	0.268301	0.227718	0.238977	0.278151	0.267412	0.197098	0.284693	0.302211	0.165722	0.203293	0.275072	0.199808	0.257476	0.23419	0.354774	0.414628	0.271262	0.136742	0.338094	0.186472	0.256947	0.234721	0.203867	0.226635	0.289852	0.258383	0.25279	0.121071	0.154033	0.173287	0.256088	0.267851	0.331153	0.176037	0.243489	0.148532	0.20261	0.21187	0.231674
4930523C07Rik	0.0152676	0.0429467	0	0.0231049	0.00686284	0.0339673	0.00945201	0.0165035	0.0482693	0.0937982	0.0274514	0.227718	0.0157533	0.0357292	0.0157533	0.0163093	0.0183615	0.0488931	0.018138	0.021935	0.0150684	0.0288811	0.00943057	0	0.00877401	0.0806257	0.0863169	0.0231049	0.0281006	0.017773	0	0.0145926	0.0407734	0.0134158	0.0117483	0.0091551	0.0253204	0.0866434	0	0	0.0121065	0.0180038	0.035546	0.0110023	0.0115525	0.0253562	0.0352448	0.0693147	0.0709973
4930524B15Rik	0.00789321	0	0.0165035	0	0.00686284	0.00829518	0.00315067	0	0.0209082	0	0.00343142	0	0	0	0	0.00407734	0.00918076	0	0.0101189	0	0	0	0.00471529	0.00924196	0	0	0.00815467	0.00770164	0	0	0.00924196	0.0218889	0	0.0178877	0.0046993	0.0115525	0	0.01529	0.0385082	0	0	0.00900191	0	0	0	0.00707293	0	0	0.0066014
4930524O05Rik	0	0	0	0	0	0	0	0	0	0	0	0	0	0	0	0.0105398	0	0	0	0	0	0	0	0	0	0	0	0	0	0	0	0	0	0	0	0	0	0	0	0	0	0	0	0	0	0	0	0	0
4930524O07Rik	0.00610702	0.0187337	0.0165035	0.0231049	0.0205885	0.0160451	0.0157533	0.0371329	0.0182407	0.0074532	0.02402	0.06116	0	0.0256176	0.0210045	0.0163093	0.00918076	0.0213276	0.0101189	0.013161	0.0226026	0.00962704	0.03105	0.00924196	0	0.0273067	0.0163093	0.0486892	0.00936685	0.053319	0.0184839	0.0145926	0	0.0249755	0.0117483	0.00577623	0.00316506	0.01529	0.0385082	0	0.0281006	0	0	0.0220047	0.0346574	0.0424376	0.0234965	0.0597253	0
4930525G20Rik	0.0183211	0	0.033007	0	0.0274514	0.0160451	0.00945201	0.0123776	0.0228009	0.0298128	0.00343142	0.0203867	0.103735	0.00714585	0.0210045	0.00407734	0.00459038	0.0106638	0.0151784	0	0.0150684	0.0192541	0.00471529	0.0277259	0.00877401	0	0.00815467	0.0231049	0.00936685	0.017773	0.00462098	0.0115643	0	0.0268315	0.0201717	0.0404336	0.0253204	0	0	0	0.0234171	0.00900191	0.0266595	0.0220047	0.0346574	0.00707293	0.0411189	0	0.0132028
4930526L06Rik	0.0427492	0.117882	0.132028	0	0.106957	0.0385082	0.100049	0.113812	0.0847508	0.0223596	0.03289	0.06116	0.103735	0.0571668	0.100663	0.0390811	0.101768	0.0702207	0.0505947	0.0201143	0.254316	0.0481352	0.0593417	0.108638	0.0438701	0.030468	0.024464	0.0308065	0.0468343	0	0.056237	0.0772309	0.0407734	0.108846	0.146876	0.0587438	0.0783506	0.0254834	0	0	0.0683076	0.099021	0.0851768	0.182473	0.0712778	0.00707293	0.0293706	0.152145	0.221211
4930527J03Rik	0.00305351	0	0	0	0	0	0.00630134	0	0.0136805	0	0.0102943	0.0203867	0	0	0.00525112	0	0.00459038	0	0.00505947	0	0	0.00962704	0	0.0184839	0.00877401	0	0	0	0	0	0	0	0	0.00447192	0.00234965	0	0.00633011	0	0.0385082	0	0.00468343	0	0	0	0	0	0	0	0.0066014
4930528D03Rik	0.012214	0	0.0165035	0	0.0137257	0.00641803	0.00630134	0.00825175	0.00456018	0.0074532	0.00686284	0	0	0.0285834	0.00525112	0.00815467	0	0.0169017	0.00505947	0.00877401	0.00753421	0	0.0188611	0	0	0.007617	0	0	0	0	0.00924196	0.0145926	0	0.00894383	0.0046993	0.0231049	0.00316506	0.023368	0	0	0.00468343	0	0.017773	0	0.0115525	0.0353647	0.0117483	0	0.0132028
4930529I22Rik	0	0	0	0	0.00686284	0.00320901	0	0	0	0	0	0	0	0	0	0.00407734	0	0	0	0.00438701	0	0	0.00471529	0	0	0	0	0	0	0.017773	0	0	0	0	0	0.00577623	0	0	0	0	0	0	0	0	0	0	0	0	0
4930532G15Rik	0.024947	0.0468343	0.0261574	0.0924196	0.0549027	0.0211312	0.030199	0.0165035	0.0364814	0.0074532	0.02402	0.101933	0	0.0142917	0.0105022	0.0186944	0.0348179	0.0106638	0.0252973	0.0157273	0.0301368	0.00962704	0.00943057	0	0.00877401	0.053319	0.0163093	0.0231049	0.0281006	0.035546	0.0277259	0.00729629	0.146171	0.0134158	0.0281958	0.03226	0.0348156	0.0101933	0.0385082	0	0.00936685	0.0180038	0.017773	0.0110023	0.0115525	0.0636564	0.0244947	0	0.04347
4930533D04Rik	0	0	0	0	0	0	0	0	0	0	0	0	0	0	0	0	0.00918076	0.0106638	0	0.00438701	0	0	0	0	0	0	0	0	0	0	0	0	0	0	0	0	0	0	0	0	0.00468343	0	0.0088865	0	0	0	0	0	0
4930533K18Rik	0	0	0	0	0	0	0	0	0	0	0	0	0	0	0	0	0	0	0	0	0	0	0.00943057	0	0	0	0	0	0	0	0.00462098	0	0	0	0	0	0	0.0182714	0	0	0	0	0.0088865	0	0	0	0	0	0
4930534D22Rik	0	0	0	0	0	0	0	0	0	0	0	0	0	0	0	0.00407734	0	0	0	0	0	0	0	0	0	0	0	0.0353117	0	0	0	0	0.0407734	0.00447192	0	0	0	0	0	0	0	0	0	0	0	0	0	0	0
4930534H18Rik	0	0	0	0	0	0	0	0	0	0	0	0	0	0	0	0.00815467	0.00918076	0.0106638	0	0.00695324	0.00753421	0	0.00471529	0	0	0.007617	0	0	0	0	0.00462098	0	0	0	0	0	0.00316506	0.00509667	0	0	0	0	0.0088865	0	0	0	0.00587413	0	0
4930535G08Rik	0	0.00936685	0	0	0.00686284	0	0.00315067	0	0.00456018	0	0	0	0	0.00714585	0	0	0.00459038	0	0	0	0.00753421	0	0	0	0	0	0	0	0	0	0	0	0	0.00447192	0.0046993	0	0	0	0	0	0	0	0	0	0	0	0	0	0.0066014
4930537H20Rik	0.0236796	0.0281006	0.0165035	0.0462098	0.0274514	0.0403853	0.0428017	0.0247553	0.0228009	0.0149064	0.0191644	0	0.0315067	0.0357292	0.0315067	0.0163093	0.0275423	0.0213276	0.0151784	0.021935	0.037671	0.00962704	0.0188611	0.0184839	0.00877401	0.022851	0.0163093	0.00770164	0.0374674	0.053319	0.0184839	0.00729629	0	0.00894383	0.0140979	0.0231049	0.0189903	0.023368	0.0385082	0	0.0374674	0.00900191	0.0444325	0.0220047	0.0115525	0	0.0293706	0.0462098	0.0198042
4930539E08Rik	0.00789321	0.0187337	0.0165035	0	0.0480399	0.00962704	0.0157533	0	0.00912036	0	0.00343142	0.0203867	0	0.00714585	0.0210045	0.00815467	0	0	0.0101189	0	0	0	0.0141459	0.0184839	0.0139065	0	0.00815467	0.0231049	0.0281006	0.017773	0	0.00729629	0	0.0223596	0.0117483	0.00577623	0.00949517	0	0	0	0.00468343	0.00900191	0.0088865	0.0110023	0.0115525	0.0212188	0	0	0.0264056
4930539J05Rik	0.00916054	0.00936685	0	0.0231049	0.0343142	0.0256721	0.0126027	0.00412588	0	0.0416258	0.0171571	0	0.0157533	0.0214375	0.0210045	0.00407734	0.00459038	0.0106638	0.00505947	0.00438701	0.0150684	0	0.00471529	0.0462098	0.00877401	0	0.00815467	0.0231049	0.00936685	0.053319	0.00924196	0.0291851	0.0815467	0.0134158	0.0187972	0.0288811	0.00633011	0.0101933	0.0385082	0	0.00468343	0.0270057	0	0.0110023	0.0298627	0.00707293	0.0117483	0.0231049	0.0132028
4930540M05Rik	0	0.00936685	0.0165035	0	0	0.00641803	0.00315067	0	0	0.0074532	0	0	0	0.00714585	0	0	0.00459038	0	0	0.00877401	0	0	0	0	0	0.007617	0	0.00770164	0	0	0.00462098	0	0.0407734	0.00894383	0.0046993	0.00577623	0.00316506	0	0	0	0	0	0.0088865	0.0110023	0	0.00707293	0.00587413	0	0
4930542C12Rik	0.012214	0.0187337	0	0	0.0137257	0.0192541	0.00315067	0.0165035	0.00456018	0	0.0137257	0	0.0157533	0.00714585	0.0135739	0.00407734	0.0137711	0	0.00505947	0	0.00753421	0.0248855	0	0.00924196	0	0	0.00815467	0.0308065	0.00936685	0	0.00924196	0.00729629	0	0.0134158	0.017822	0	0.00633011	0	0	0	0.00468343	0.00900191	0	0.0110023	0.0115525	0	0	0	0
4930542D17Rik	0	0	0	0	0	0	0	0.00412588	0.00456018	0.0074532	0	0	0	0	0	0	0	0	0	0	0	0	0.00471529	0	0	0	0	0.00770164	0	0	0	0	0	0	0	0	0	0	0	0	0	0.00900191	0	0	0	0	0	0	0
4930543E12Rik	0	0	0	0	0	0	0	0	0.00456018	0	0.00343142	0	0	0	0	0	0	0	0	0	0	0	0	0	0	0	0	0	0	0	0	0	0	0	0	0	0	0.00509667	0	0	0	0	0	0	0	0	0	0	0
4930544F09Rik	0.0213746	0.0562011	0.0825175	0.152145	0.106957	0.0500124	0.0698501	0.0436722	0.0737377	0.0223596	0.05691	0.0407734	0.0407218	0.0428751	0.0525112	0.00407734	0.0734461	0.102212	0.0556542	0.0446155	0.0527395	0.0481352	0.0404806	0.0739357	0.0701921	0.038085	0.0618529	0.00770164	0.00936685	0.035546	0.0442919	0.0583703	0	0.0491911	0.0681399	0.0495887	0.0714827	0.0590447	0.0385082	0	0.0382632	0.0630134	0.106638	0.0770164	0.0991774	0.0848752	0.0528672	0.0462098	0.0605344
4930545E07Rik	0	0	0	0	0	0	0	0.00412588	0	0	0	0	0	0	0	0	0	0	0.0101189	0	0	0	0	0	0	0	0	0	0	0	0	0	0	0	0	0	0	0	0	0	0	0	0	0	0	0	0	0	0
4930546K05Rik	0	0	0	0	0	0.00320901	0	0.00412588	0	0	0	0	0	0	0	0	0	0	0	0.00438701	0	0.00962704	0	0	0	0	0	0.00770164	0	0	0.00462098	0	0	0.00447192	0	0	0	0	0	0	0	0	0.0088865	0	0	0	0	0	0
4930547E08Rik	0	0	0	0	0	0	0.00315067	0	0	0	0.00343142	0	0	0	0.00525112	0	0.00459038	0	0	0	0	0	0	0	0	0	0	0	0.00936685	0	0	0	0	0.00447192	0	0	0	0	0	0	0	0	0	0	0	0	0	0	0
4930547E14Rik	0	0	0	0	0	0.00320901	0	0.00412588	0	0	0	0	0	0	0	0	0	0.0106638	0	0	0	0	0.00471529	0	0.00877401	0	0	0.00770164	0	0	0.00462098	0	0	0	0.00939861	0	0.00316506	0	0	0	0	0	0	0	0.0115525	0	0	0	0.0066014
4930547M16Rik	0	0	0	0	0.0137257	0	0	0.00412588	0	0	0	0	0	0.00714585	0	0	0.00459038	0.0106638	0	0	0	0	0.00471529	0.00924196	0	0	0	0	0	0	0.00462098	0.00729629	0	0.00447192	0	0	0.00316506	0.00509667	0	0	0	0	0	0	0	0	0	0	0
4930548H24Rik	0.0595733	0.0671596	0.115525	0.115525	0.0802983	0.0577623	0.0519604	0.0835355	0.0853403	0.0819852	0.0468178	0	0.04726	0.0809048	0.0315067	0.0285414	0.0317052	0.0319914	0.0535543	0.0533896	0.0452053	0.0537667	0.0573847	0.0423741	0.0314545	0.0577747	0.0897014	0.0231049	0.133166	0.071092	0.0489129	0.0626383	0.0407734	0.10623	0.0707743	0.0553649	0.0667093	0.023368	0.0995422	0	0.0374674	0.0450096	0.0799785	0.0220047	0.0808672	0.0353647	0.0739257	0.0693147	0.033007
4930549G23Rik	0.00610702	0	0.0165035	0.0231049	0	0.0128361	0.0157533	0.00825175	0.00912036	0.0074532	0.00343142	0.0203867	0.0315067	0.0142917	0.0157533	0.0268491	0.0229519	0	0.0252973	0.017548	0.0270099	0	0.00943057	0	0.00877401	0	0.00815467	0.00770164	0.00936685	0.017773	0.0138629	0	0	0.0134158	0.00704895	0.0115525	0.0158253	0.00509667	0	0	0.0187337	0.00900191	0.017773	0.0110023	0	0.00707293	0.0117483	0	0.0198042
4930550C14Rik	0.00916054	0.0577928	0.033007	0.0366204	0.0274514	0.0128361	0.030199	0.033007	0.0228009	0.0298128	0.0343142	0	0.0157533	0.0214375	0.0105022	0.0285414	0.036723	0.0106638	0.0261571	0.0332753	0.0150684	0.0192541	0.00943057	0.0184839	0.00877401	0.038085	0	0.0231049	0.0281006	0.053319	0.0119451	0.0218889	0	0.0447192	0.0342696	0.0115525	0.0271719	0.0131747	0.0385082	0.173287	0.0140503	0.00900191	0.035546	0	0.0346574	0.0282917	0.0234965	0	0.0368686
4930551O13Rik	0	0	0	0	0	0	0	0	0	0	0	0	0	0	0.00525112	0	0	0	0	0	0	0	0	0	0	0	0	0	0	0	0	0	0	0	0	0	0	0.00509667	0	0	0	0	0	0	0	0	0	0	0
4930553M12Rik	0	0	0	0	0	0.00641803	0	0.00412588	0	0	0.00343142	0	0	0.00714585	0.00525112	0	0	0.0106638	0	0	0.00753421	0.00962704	0	0	0	0	0	0	0	0	0	0.00729629	0	0	0.00234965	0	0	0	0	0	0.00468343	0	0	0	0.0115525	0	0	0	0
4930556J02Rik	0	0	0	0	0	0	0	0.00412588	0	0	0	0	0	0	0	0	0	0	0	0.00438701	0	0	0	0	0	0	0.00815467	0	0	0	0	0	0	0.00447192	0	0	0	0	0	0	0	0	0	0	0	0	0	0	0
4930556M19Rik	0.0822152	0.065568	0.0495105	0.0231049	0.0686284	0.0481352	0.0609335	0.0477981	0.0547221	0.074532	0.0534786	0.0407734	0.0945201	0.054201	0.0398295	0.00815467	0.0577697	0.0106638	0.0505947	0.0464363	0.037671	0.0385082	0.0518682	0.0331321	0.0701921	0.0425407	0.0292342	0.00770164	0.0710472	0.071092	0.0423741	0.0729629	0	0.0313034	0.0657902	0.0346574	0.0493273	0.01529	0	0.173287	0.0710472	0.0825469	0.0318578	0.0440093	0.0346574	0.046575	0.0587413	0.0462098	0.102883
4930557F08Rik	0	0	0	0	0.00686284	0	0	0	0	0.0074532	0.00343142	0	0	0	0	0	0	0	0.00505947	0.00438701	0	0	0	0	0	0	0	0.00770164	0	0	0.00462098	0	0	0	0.0046993	0	0	0	0	0	0	0	0.017773	0.0220047	0	0	0.00587413	0	0
4930557J02Rik	0.00610702	0.00936685	0	0	0	0.00320901	0	0	0	0	0	0	0	0	0	0	0	0	0	0	0	0	0	0	0	0	0	0	0	0	0	0	0	0	0	0	0.00316506	0	0	0	0	0	0	0	0	0	0.00587413	0	0
4930558J18Rik	0.127269	0.17797	0.151336	0.0693147	0.135575	0.113951	0.194868	0.173678	0.234894	0.15033	0.167882	0.0407734	0.20747	0.144131	0.172798	0.0753975	0.18327	0.119114	0.194839	0.1086	0.201577	0.150037	0.147776	0.130958	0.209917	0.118711	0.154939	0.0892232	0.179562	0.195503	0.212573	0.161758	0.24464	0.163269	0.199367	0.17525	0.164883	0.0896248	0.176559	0	0.162772	0.163564	0.198523	0.228352	0.15694	0.14266	0.103296	0.0693147	0.160677
4930558J22Rik	0.00610702	0	0.0165035	0	0	0.0128361	0	0.00412588	0.00456018	0	0.0205885	0	0.0315067	0.00714585	0.0105022	0	0	0	0.0101189	0	0.00753421	0	0	0	0	0	0	0.00770164	0.00936685	0	0	0	0	0.00447192	0.00704895	0.0173287	0.00633011	0	0	0	0.00936685	0.00900191	0	0.0110023	0.0115525	0	0.0117483	0.0231049	0.0066014
4930558K02Rik	0.00305351	0.00936685	0	0	0	0.00320901	0.00315067	0	0	0	0.00686284	0	0	0.00714585	0	0	0	0.0106638	0	0	0.00753421	0	0	0	0	0	0	0.0154033	0	0.017773	0	0	0	0	0.0046993	0.00577623	0.00316506	0	0	0	0.00468343	0.0180038	0	0	0	0.00707293	0	0	0
4930558N11Rik	0	0.00936685	0	0	0	0	0	0	0	0	0	0	0	0	0.00525112	0	0	0	0.00505947	0	0.00753421	0	0.00943057	0	0	0	0	0	0	0	0	0	0	0	0	0	0	0	0.0385082	0	0	0	0	0.0220047	0	0.00707293	0	0	0
4930562A09Rik	0	0	0.0165035	0	0	0	0	0	0	0	0	0	0	0	0	0	0	0	0.00505947	0.00438701	0	0	0	0	0	0	0	0	0	0.017773	0	0	0	0	0	0	0.00316506	0	0	0	0	0	0	0	0	0	0	0	0
4930563E22Rik	0.0183211	0.0281006	0.066014	0.0828302	0.0549027	0.0288811	0.0238977	0.0371329	0.0437091	0.0223596	0.0191644	0.06116	0.0157533	0.00714585	0.0315067	0.0326187	0.0229519	0.0319914	0.0354163	0.0376623	0.0678079	0.0481352	0.0754446	0.00924196	0.0438701	0.015234	0.0163093	0.0308065	0.00936685	0.0992616	0.0231049	0.0145926	0.0646243	0.0428632	0.0403433	0.0635385	0.0379807	0.0101933	0.0385082	0.173287	0.0468343	0.0540115	0.0762903	0.0550117	0.0115525	0.0395021	0.044555	0.0693147	0.033007
4930563J15Rik	0	0	0	0	0	0	0	0	0	0	0.00343142	0	0	0	0.00525112	0.00407734	0	0	0	0	0	0	0	0	0	0	0	0	0	0	0	0	0	0	0	0	0	0	0	0	0.00468343	0	0	0	0	0	0.00587413	0	0
4930565N06Rik	0	0	0	0	0	0.00641803	0.00315067	0	0	0	0	0	0	0.0142917	0	0	0	0	0	0	0	0	0.00471529	0.00924196	0	0.007617	0	0	0.00936685	0	0	0	0	0	0	0	0.00633011	0.00509667	0	0	0	0	0	0	0	0.00707293	0.00587413	0	0
4930566F21Rik	0.1952	0.225692	0.26686	0.196203	0.343792	0.20835	0.279884	0.208397	0.317752	0.244129	0.159595	0.0815467	0.200932	0.234061	0.25691	0.106704	0.233578	0.19376	0.250493	0.202885	0.287014	0.292083	0.337829	0.217276	0.288066	0.248921	0.0815467	0.0982335	0.177266	0.134808	0.224163	0.231693	0.326187	0.245963	0.277708	0.256561	0.318367	0.127034	0.0995422	0.173287	0.247081	0.29112	0.250332	0.18679	0.27639	0.258231	0.0939861	0.354426	0.134272
4930568G15Rik	0	0	0	0	0	0	0	0	0	0	0	0	0	0	0	0	0	0	0	0	0	0	0	0	0	0	0	0	0	0	0.00462098	0	0	0	0	0	0	0	0	0	0	0	0	0	0	0	0	0	0
4930570G19Rik	0	0	0	0	0	0	0	0	0	0.0149064	0	0	0	0.00714585	0	0.00407734	0.00459038	0	0	0	0.00753421	0	0	0	0	0	0	0	0	0	0	0	0	0	0.00234965	0	0.00316506	0.00509667	0	0	0	0	0	0	0	0	0	0	0
4930572G02Rik	0	0	0	0	0	0	0	0	0	0	0.00343142	0	0	0	0.00525112	0	0	0	0.00505947	0	0	0.00962704	0	0	0	0	0	0	0	0	0.00462098	0	0	0	0.00234965	0	0	0	0	0	0	0	0	0	0	0	0	0	0
4930578M01Rik	0.0170537	0.0281006	0.033007	0	0.0137257	0.0211312	0.0459524	0.033007	0.0273611	0.0223596	0.0446085	0.0203867	0.04726	0.0142917	0.04726	0.024464	0.0413134	0.0426552	0.0404757	0.0245013	0.0527395	0.00962704	0.0282917	0.0238901	0.017548	0	0.0210795	0.00770164	0.00936685	0.035546	0.0535339	0.0218889	0.0815467	0.0313034	0.0473923	0.0231049	0.0538059	0.0254834	0	0	0.0140503	0.0180038	0.0266595	0.0110023	0.0346574	0.0424376	0.0411189	0	0.0198042
4930578M07Rik	0.0109467	0	0	0	0.0205885	0.0224631	0.00945201	0.00825175	0.0163481	0	0.0171571	0.0203867	0.0157533	0.00714585	0.0105022	0.00815467	0.011866	0.0213276	0	0.017548	0.00753421	0.00962704	0.00471529	0.00924196	0.00877401	0.007617	0	0.0154033	0.00936685	0.035546	0.0138629	0.0261569	0	0.0134158	0.0117483	0.0115525	0.0126602	0.00509667	0	0	0.00936685	0.0180038	0.017773	0.0220047	0	0.00707293	0.00587413	0.0231049	0.0170644
4930579C12Rik	0.0048397	0	0	0.0231049	0	0.00320901	0	0	0.00456018	0.0074532	0	0	0	0	0.00832282	0	0	0	0.0101189	0.00438701	0	0.00962704	0	0.0184839	0	0	0	0	0	0	0	0.0145926	0	0.0125543	0.00704895	0	0	0	0	0	0	0	0	0.0110023	0.0115525	0	0	0	0
4930579G18Rik	0.012214	0	0.0495105	0	0	0.00962704	0.00945201	0.00825175	0.00912036	0.0074532	0.0137257	0	0.0157533	0.0285834	0.0210045	0.0163093	0.00459038	0.0106638	0.0101189	0.013161	0	0.0288811	0.0141459	0.00924196	0.017548	0.015234	0.00815467	0	0	0	0.0138629	0.0291851	0	0.00447192	0.0140979	0.00577623	0.0189903	0.00509667	0	0	0.00936685	0	0.0088865	0.0284406	0.0529676	0.0212188	0	0	0
4930579G24Rik	0.142018	0.108515	0.104334	0.152145	0.123531	0.158332	0.138393	0.134131	0.117447	0.184503	0.167882	0.186944	0.110273	0.114334	0.166749	0.133553	0.131216	0.144867	0.126487	0.0928726	0.14443	0.146042	0.140303	0.167926	0.119195	0.156796	0.14817	0.0905319	0.159237	0.191147	0.145606	0.102148	0.0407734	0.0946702	0.136103	0.128059	0.123975	0.133379	0.0770164	0.173287	0.0964082	0.14556	0.115525	0.237485	0.06452	0.138523	0.204155	0.138629	0.13315
4930579K19Rik	0.0244281	0.0187337	0.033007	0	0.0343142	0.0256721	0.0220547	0.0247553	0.0528295	0.0074532	0.03289	0	0.04726	0.00714585	0.0262556	0.012232	0.0183615	0.0746466	0.0282569	0.017548	0.00753421	0.0288811	0.0235764	0	0.00877401	0.030468	0.024464	0.0693147	0.0281006	0.035546	0.0138629	0	0	0.0223596	0.0211469	0.0231049	0.0240068	0.06116	0	0	0.0281006	0.00900191	0	0.0110023	0.0231049	0.0536479	0.0210585	0.0231049	0.0236658
4930581F22Rik	0.032037	0	0.0495105	0.0231049	0.0274514	0.0275493	0.0315067	0.00412588	0	0.0416258	0.02402	0.0203867	0.0157533	0.00714585	0	0.024464	0.0302275	0.0319914	0.0455352	0.0245013	0	0.00962704	0.0235764	0.0277259	0.026322	0.007617	0.0163093	0.0231049	0.00936685	0	0.021187	0.00729629	0	0.0223596	0.0187972	0.0115525	0.0126602	0.0254834	0.0385082	0	0.0448905	0.0360076	0.017773	0.0504453	0.0298627	0.0748667	0.0293706	0.0231049	0.0566728
4930583K01Rik	0.00305351	0	0	0	0	0.00320901	0	0	0	0	0.00343142	0	0	0	0	0.00815467	0	0	0	0.00438701	0	0	0.00943057	0	0	0	0	0	0.00936685	0	0	0	0	0	0	0	0	0	0	0	0	0	0	0	0	0	0.00587413	0	0
4930589L23Rik	0.012214	0	0	0	0.0205885	0.0128361	0.00945201	0.0206294	0.0254684	0.0074532	0.0274514	0.0203867	0	0.0142917	0.0135739	0.00815467	0.0321327	0.0106638	0.0303568	0.013161	0.0420783	0.0192541	0.0188611	0.00924196	0.00877401	0.0196897	0.00815467	0.00770164	0	0	0.0138629	0.0145926	0.0407734	0.00447192	0.0117483	0.0115525	0.0303369	0.0203867	0	0	0.0140503	0	0	0.0110023	0	0.0212188	0.0234965	0.0231049	0.033007
4930590J08Rik	0	0.00936685	0	0	0	0.0211312	0.00630134	0.00825175	0.00456018	0	0.00343142	0	0	0	0.0105022	0	0.00918076	0	0.0101189	0.021935	0.0150684	0.0192541	0.00943057	0.0238901	0.026322	0	0.0163093	0.0231049	0.00936685	0	0.00924196	0	0.0407734	0.00894383	0.0117483	0	0.0126602	0.0254834	0	0	0	0.00900191	0.0088865	0.0220047	0.0231049	0.00707293	0	0.0231049	0
4930591A17Rik	0.00305351	0	0	0	0	0	0.00315067	0.00412588	0	0	0	0	0	0.00714585	0	0	0	0	0	0	0	0	0.00471529	0	0	0	0	0	0	0	0	0	0	0	0.00234965	0	0	0	0	0	0	0	0	0.0110023	0	0	0	0	0
4930592C13Rik	0.00610702	0	0	0	0.0137257	0	0.00630134	0.00412588	0.0182407	0.0149064	0.0137257	0	0.0315067	0.00714585	0.00525112	0.00815467	0.00459038	0	0	0.00438701	0	0	0.00943057	0	0	0.007617	0	0.0308065	0	0	0.0138629	0.0218889	0.0407734	0.00447192	0.0046993	0.00577623	0.00818155	0.00509667	0.0385082	0	0	0.00900191	0	0	0	0.0212188	0.044555	0	0.0066014
4930592I03Rik	0	0	0	0	0	0.00320901	0	0	0	0	0	0	0	0	0	0	0.00459038	0	0	0	0	0	0	0.00924196	0	0	0	0	0	0	0	0	0	0	0	0	0	0	0	0	0	0	0	0	0	0	0	0.0231049	0.0066014
4930594M22Rik	0.0152676	0.00936685	0.033007	0.0231049	0.0137257	0.0160451	0.018904	0.0165035	0.0228009	0.0639854	0.0171571	0.06116	0	0.0214375	0.0188251	0.0203867	0.00459038	0.0106638	0.0151784	0.00877401	0.00753421	0	0.0141459	0.0462098	0.00877401	0.015234	0.0570827	0.0154033	0.00936685	0	0.0184839	0.0218889	0.0407734	0.0178877	0.0131227	0.0231049	0.00949517	0	0.0385082	0	0.0281006	0.0450096	0.0088865	0.0110023	0	0.0282917	0.0117483	0.0462098	0.0132028
4930595D18Rik	0	0.00936685	0	0.0231049	0	0	0	0	0	0	0	0	0	0	0	0	0	0	0	0	0	0	0.00471529	0	0	0	0	0	0	0	0.00462098	0	0	0	0	0	0	0	0	0	0	0	0	0	0	0	0	0	0
4930596I21Rik	0	0	0	0	0	0	0	0	0	0	0	0	0	0	0	0.00815467	0	0	0.00505947	0	0	0.00962704	0	0	0	0	0	0	0	0	0	0	0	0	0	0	0	0	0	0	0	0	0	0	0	0	0	0	0
4930597O21Rik	0.00305351	0	0	0	0	0.00320901	0.00315067	0	0.00912036	0.0074532	0.00686284	0	0.0157533	0	0	0.0635451	0	0	0.0101189	0.026322	0	0	0	0.00924196	0	0	0	0.0154033	0.00936685	0	0	0	0	0	0.00234965	0.00577623	0	0	0	0	0	0	0	0	0.0115525	0.0141459	0.044555	0	0
4930598F16Rik	0.00305351	0	0	0	0	0	0	0	0	0	0	0	0	0	0	0	0	0	0	0	0	0	0	0	0	0	0	0	0	0	0	0	0	0	0	0	0.00316506	0	0	0	0	0	0	0.0110023	0	0	0	0	0
4930599N23Rik	0	0	0.0165035	0	0	0	0	0	0	0	0	0	0	0	0	0	0	0	0.00505947	0	0	0	0	0	0	0	0	0.00770164	0	0	0	0	0	0	0.00234965	0	0	0	0	0	0	0	0	0	0	0	0	0	0.0066014
4931406C07Rik	0.620287	0.483372	0.648005	0.450772	0.555353	0.571231	0.642011	0.649914	0.646457	0.32542	0.491277	0.338112	0.612939	0.750607	0.738975	0.490686	0.678012	0.713954	0.579178	0.589939	0.762002	0.553665	0.665935	0.571461	0.608204	0.71676	0.478527	0.528103	0.682234	0.622084	0.675239	0.750874	0.825528	0.633032	0.694076	0.618831	0.606574	0.634053	0.513693	0	0.623202	0.715078	0.701861	0.627348	0.506914	0.478162	0.428831	0.58725	0.55756
4931406P16Rik	0.42844	0.438129	0.423509	0.51616	0.504901	0.564382	0.479571	0.503761	0.505852	0.508108	0.477371	0.461998	0.539783	0.427269	0.416725	0.349731	0.382922	0.358963	0.505468	0.327706	0.375011	0.482107	0.525015	0.414499	0.361344	0.355559	0.433743	0.296588	0.370802	0.379273	0.397857	0.284007	0.36696	0.424174	0.474153	0.393878	0.451899	0.600008	0.327006	0.621227	0.425143	0.411205	0.607479	0.455877	0.321524	0.448553	0.498773	0.25808	0.491265
4931413I07Rik	0	0	0	0	0	0	0	0	0	0	0	0	0	0	0	0	0	0	0	0	0	0	0	0	0	0	0	0.0154033	0	0	0.00462098	0	0	0	0	0	0	0.00509667	0	0	0	0	0.0088865	0	0	0	0	0	0
4931413K12Rik	0	0	0	0	0	0	0.00315067	0	0	0	0	0	0	0	0	0.00407734	0	0	0	0	0.00753421	0	0	0	0	0	0	0	0	0	0.00924196	0	0	0	0	0	0	0	0	0	0	0	0	0	0	0	0	0	0
4931414P19Rik	0.0878034	0.164716	0.158185	0.184839	0.120683	0.127574	0.150995	0.131718	0.127342	0.142877	0.170472	0.154632	0.150995	0.122694	0.218865	0.107396	0.122815	0.138629	0.129446	0.122836	0.162626	0.0962704	0.158363	0.178738	0.19601	0.154929	0.0618529	0.142418	0.17797	0.0814886	0.146739	0.154462	0.163093	0.140149	0.152551	0.186802	0.139024	0.0998181	0.0770164	0.173287	0.125305	0.194306	0.138496	0.199912	0.191597	0.189235	0.130229	0.254154	0.165035
4931415C17Rik	0.00789321	0	0.033007	0.0462098	0	0.00962704	0.0126027	0.0147911	0.0136805	0.0149064	0.0157329	0.0203867	0	0.00714585	0.0105022	0.00407734	0.0137711	0.0319914	0.0101189	0.013161	0.0150684	0	0.00747355	0	0	0.007617	0.0163093	0.00770164	0.0281006	0	0.0277259	0.0218889	0	0.00447192	0.00704895	0.0173287	0	0.04587	0	0	0.0140503	0.00900191	0.0088865	0.033007	0	0.0141459	0.0234965	0.0231049	0.0066014
4931422A03Rik	0	0	0	0	0.00686284	0	0	0.00412588	0	0.0074532	0	0	0	0	0	0	0.00459038	0	0	0.00877401	0	0	0.00943057	0	0	0	0	0	0	0.017773	0	0	0	0	0.00234965	0.00577623	0.00633011	0	0	0	0.00468343	0	0.0088865	0	0	0	0.00587413	0	0
4931423N10Rik	0	0	0	0	0.00686284	0	0	0	0	0.0074532	0.00343142	0	0	0	0.00525112	0.00407734	0.00459038	0	0.00505947	0	0.00753421	0	0	0	0	0	0	0.00770164	0	0	0	0	0	0.0134158	0	0.00577623	0	0.0101933	0	0	0	0	0	0	0	0	0	0	0
4931428F04Rik	0.157286	0.151461	0.165035	0.17525	0.13156	0.230567	0.155989	0.136855	0.220095	0.217982	0.231655	0.163093	0.204793	0.148311	0.159318	0.161095	0.18171	0.168007	0.218896	0.146262	0.162059	0.220698	0.177671	0.149442	0.159423	0.217732	0.161095	0.107823	0.127248	0.2059	0.139415	0.0918235	0.203867	0.125974	0.137877	0.14299	0.158553	0.172038	0.115525	0	0.165512	0.127556	0.20741	0.135767	0.11073	0.0778022	0.172346	0.0924196	0.150214
4931428L18Rik	0.00305351	0.00936685	0	0	0	0	0	0.00412588	0	0	0.00343142	0	0	0.00714585	0.00525112	0	0	0	0	0	0	0	0	0	0	0	0	0	0	0	0	0	0	0	0	0	0.00316506	0	0	0	0	0	0	0.0110023	0	0	0.0176224	0	0
4931429L15Rik	0	0	0	0	0	0	0	0	0	0	0.00343142	0	0	0	0	0	0	0	0	0.00877401	0	0	0	0	0	0	0	0.00770164	0	0	0	0	0	0	0.00234965	0	0	0	0	0	0	0	0	0	0	0	0	0	0
4931431C16Rik	0	0	0	0	0	0	0	0	0	0	0	0	0	0.00714585	0	0	0	0	0	0	0	0	0	0	0	0	0	0	0	0	0	0	0	0	0	0	0	0	0	0	0	0	0	0	0	0	0	0	0
4931440F15Rik	0.00789321	0	0.0165035	0.0231049	0	0	0.00945201	0.00412588	0	0	0	0.0203867	0	0	0	0.012232	0	0	0	0	0.00753421	0	0.0121888	0	0	0	0.00815467	0.0385082	0	0.017773	0.00462098	0	0	0.00447192	0.00939861	0.0115525	0.00316506	0.0101933	0	0	0.00468343	0	0	0.0220047	0	0.0141459	0.00587413	0	0
4932413F04Rik	0	0	0	0	0	0	0	0.00412588	0	0.0074532	0	0	0	0	0	0	0	0	0	0	0.00753421	0	0	0	0	0	0	0	0	0	0	0	0	0	0	0	0	0	0	0	0	0	0	0	0	0	0	0	0
4932416K20Rik	0.0170537	0.0187337	0.033007	0.0462098	0.024603	0.0160451	0.028356	0.0247553	0.0456018	0.0267194	0.0369046	0.0815467	0.04726	0.0184717	0.0157533	0.036696	0.0394082	0.0319914	0.0514544	0.0307091	0.0345441	0.0385082	0.0357653	0.00924196	0.017548	0.022851	0.048928	0.0462098	0	0	0.0231049	0.0145926	0	0.0249755	0.0211469	0.0404336	0.033502	0.03058	0.0385082	0	0.00936685	0.0180038	0.035546	0.0110023	0	0.0305687	0.0234965	0	0.0236658
4932422M17Rik	0.0847499	0.0897809	0.231049	0.0924196	0.154997	0.168505	0.184345	0.116927	0.114779	0.0937982	0.110389	0.0730855	0.0787667	0.153706	0.147924	0.0910871	0.130871	0.0915483	0.135366	0.0998259	0.190916	0.0673893	0.156683	0.18798	0.119195	0.0653917	0.0536982	0.292537	0.198296	0.244466	0.191816	0.202508	0.146171	0.123358	0.151575	0.131437	0.152998	0.04587	0.13805	0.173287	0.151461	0.113289	0.161467	0.149466	0.0991774	0.14266	0.157162	0.115525	0.143613
4932438A13Rik	0.563428	0.601805	0.720599	0.861832	0.614718	0.646229	0.555831	0.617345	0.724385	0.739036	0.623767	0.89755	0.568613	0.614694	0.657497	0.602539	0.579272	0.759973	0.52153	0.656289	0.550465	0.635416	0.602347	0.599353	0.77114	0.669488	0.7156	0.673276	0.680795	0.810336	0.60972	0.583727	0.723926	0.621122	0.554982	0.626598	0.568573	0.893011	0.475185	0.621227	0.614847	0.640962	0.648744	0.661021	0.613393	0.69368	0.698477	0.423741	0.539222
4932438H23Rik	0	0	0	0.0231049	0.00686284	0	0	0	0.00456018	0	0	0	0	0	0	0	0	0	0	0	0	0	0	0	0.00877401	0	0	0	0	0	0	0	0	0	0	0	0	0.250137	0	0	0	0.00900191	0	0	0	0	0	0	0
4932443L11Rik	0	0	0	0	0.00686284	0	0	0	0	0	0	0	0	0	0	0	0	0	0	0	0	0	0	0	0	0	0	0	0	0	0.00462098	0	0	0	0	0	0	0.00509667	0	0	0	0	0	0	0	0	0	0	0
4932702P03Rik	0	0	0	0	0	0.00320901	0.00315067	0	0	0	0	0	0	0	0.00832282	0.00407734	0.00918076	0.0106638	0	0	0	0	0.00471529	0	0	0	0	0.00770164	0.00936685	0	0	0	0.0407734	0.00708782	0.0140979	0.00577623	0	0.00509667	0	0	0	0.00900191	0	0	0	0	0	0	0.0132028
4933400F21Rik	0	0	0	0	0	0	0.00315067	0	0	0	0	0	0	0	0.00525112	0	0	0.0106638	0.00505947	0	0	0	0	0	0	0	0	0.00770164	0	0	0	0.00729629	0	0	0	0	0	0.00509667	0	0	0.00468343	0	0	0	0	0	0.00587413	0	0
4933401D09Rik	0	0	0	0	0.00686284	0.00320901	0	0.00412588	0	0.0341726	0.00543867	0.0203867	0	0	0.00525112	0	0.00459038	0	0	0	0	0.00962704	0	0	0	0	0	0	0	0	0	0	0.0407734	0.00447192	0	0	0	0	0	0	0	0	0	0	0	0	0.00587413	0	0.0066014
4933402E13Rik	0.0956966	0.259104	0.0825175	0.0231049	0.146452	0.0192541	0.0811451	0.102136	0.131902	0.0074532	0.0451916	0	0.0722285	0.13402	0.11513	0.0203867	0.0715409	0.0853104	0.0455352	0.0245013	0.156372	0.309769	0.177479	0.224253	0.134592	0.038085	0.0163093	0.0353117	0.19014	0.017773	0.0231049	0.0626383	0	0.0749265	0.10082	0.0816139	0.107302	0.0314461	0.0770164	0.173287	0.10931	0.0900191	0.100772	0.13557	0.115525	0.0182833	0.0328068	0.0693147	0.0368686
4933403O08Rik	0	0	0	0	0	0	0	0	0	0.0074532	0	0	0	0	0	0	0	0	0	0	0	0	0	0	0	0	0	0	0	0	0	0	0	0	0	0	0	0.0101933	0.0385082	0	0	0	0	0	0	0.00707293	0	0	0
4933404K08Rik	0	0	0	0	0	0	0	0	0	0	0	0	0	0	0	0.00407734	0	0	0	0.00695324	0	0.00962704	0	0	0	0	0.00815467	0	0	0	0	0	0	0	0	0	0	0	0	0	0	0	0	0	0	0	0	0	0
4933404O12Rik	0.257308	0.412157	0.449667	0.152145	0.44558	0.388306	0.462155	0.4119	0.306396	0.370285	0.447907	0.271955	0.424156	0.310914	0.383039	0.424443	0.37503	0.319112	0.407816	0.425117	0.489169	0.180554	0.411763	0.291047	0.404753	0.23426	0.458061	0.234975	0.519095	0.438632	0.293832	0.325865	0.414662	0.391424	0.417539	0.370773	0.435298	0.229833	0.292083	0.274653	0.306458	0.482543	0.424388	0.363922	0.292737	0.34365	0.307902	0.364015	0.363702
4933405D12Rik	0.00610702	0	0	0	0.0137257	0	0	0	0.00456018	0	0	0	0	0	0	0	0	0.0106638	0	0.013161	0	0	0	0	0.00877401	0	0	0	0	0	0.00462098	0	0	0	0.00704895	0.00577623	0.00316506	0.01529	0	0	0	0	0	0	0	0.0141459	0.0117483	0	0
4933405L10Rik	0.012214	0.00936685	0.0165035	0	0	0.00641803	0.0126027	0.0123776	0.0136805	0.0074532	0.00343142	0	0.0157533	0.0142917	0.00525112	0.00407734	0.00459038	0	0	0.017548	0	0.0192541	0.00943057	0	0.017548	0	0.00815467	0	0.0281006	0.017773	0.0184839	0.00729629	0.0407734	0.00894383	0.00704895	0.00577623	0.00633011	0.00509667	0.0385082	0	0.0140503	0	0.0088865	0	0	0.0212188	0.00587413	0	0.0132028
4933406B17Rik	0.00305351	0	0	0	0.00686284	0	0	0	0	0	0.00343142	0	0	0.00714585	0	0	0	0	0	0.00438701	0	0	0	0	0	0	0	0.00770164	0	0.0498951	0	0	0	0	0	0	0	0.0904908	0	0	0	0	0.0088865	0	0	0	0.0621774	0	0
4933406C10Rik	0	0	0	0.0231049	0.00686284	0.00320901	0.00315067	0	0	0	0.00343142	0	0	0	0	0.012232	0	0.0106638	0	0	0	0	0	0.00924196	0	0	0	0.0231049	0	0.053319	0	0	0	0	0.00704895	0	0.00633011	0.03058	0	0	0.00468343	0.00900191	0.0088865	0	0	0	0.0176224	0	0
4933406I18Rik	0.00305351	0	0	0	0	0	0	0.00412588	0	0	0	0	0	0	0	0	0	0	0.00505947	0	0	0	0	0	0	0	0	0	0	0	0	0	0	0	0	0	0.00316506	0.00509667	0	0	0	0	0	0	0	0	0	0	0
4933406J09Rik	0.00916054	0	0	0	0	0	0.00630134	0.00412588	0.0136805	0	0	0	0.0157533	0.00714585	0	0	0.00459038	0	0	0	0.00753421	0.0288811	0.0188611	0.0184839	0.00877401	0	0	0	0.0187337	0	0.00462098	0	0	0.00447192	0	0.0115525	0.00633011	0	0	0	0	0	0	0.0110023	0.0115525	0	0	0	0
4933406J10Rik	0	0	0	0	0	0	0	0	0.00456018	0	0	0	0	0.00714585	0	0	0	0	0	0	0	0	0.00471529	0	0	0	0	0	0	0	0	0	0	0.00447192	0	0	0.00316506	0	0	0	0	0	0	0	0	0	0	0	0
4933406M09Rik	0	0	0.0165035	0	0.0137257	0.00962704	0	0	0.00456018	0	0	0	0	0.00714585	0.00525112	0.00815467	0	0	0.0130785	0.00438701	0.0150684	0	0	0.00924196	0	0.007617	0	0	0	0	0	0	0	0.00894383	0.0046993	0.0115525	0	0	0	0	0.00936685	0	0	0.0110023	0	0	0	0	0
4933406P04Rik	0.0109467	0.0148461	0	0	0.00686284	0.00641803	0.00630134	0.0165035	0.00912036	0.0149064	0.00686284	0	0	0.00714585	0.0105022	0.00407734	0.00459038	0.0106638	0.00505947	0	0.0150684	0.00962704	0.00943057	0.0184839	0.026322	0.015234	0.0163093	0	0.0187337	0.017773	0	0.0218889	0.0407734	0.0178877	0.00939861	0.00577623	0.00949517	0.0101933	0	0	0.00936685	0.0180038	0	0	0.0115525	0	0.0234965	0	0.010463
4933407K13Rik	0.0860172	0.132728	0.167839	0.0828302	0.0932315	0.0748979	0.101357	0.134131	0.0737377	0.157784	0.163026	0.195406	0.166749	0.104222	0.110273	0.0961638	0.147672	0.0702207	0.0809515	0.0797116	0.133769	0.0537667	0.125356	0.129387	0.0438701	0.091404	0.118936	0.112328	0.108515	0.223673	0.0331321	0.145926	0.0407734	0.0760226	0.0887108	0.12468	0.118721	0.0853941	0.154033	0.173287	0.105775	0.086283	0.10295	0.066014	0.105935	0.106094	0.0797998	0.0828302	0.0974029
4933408B17Rik	0.0463215	0.0429467	0.099021	0.0693147	0.0274514	0.0403853	0.0598627	0.0412588	0.0509369	0.0521724	0.0480399	0.142707	0.0315067	0.0428751	0.0420089	0.0992418	0.0439986	0.053319	0.0594735	0.0584434	0.0420783	0.0385082	0.0499111	0.0554518	0.026322	0.0273067	0.048928	0.0231049	0.0562011	0.035546	0.0600728	0.0291851	0	0.0383912	0.0366192	0.0346574	0.0443108	0.01529	0.154033	0	0.0468343	0.0180038	0.0622055	0.0550117	0.0462098	0.0648582	0.0680516	0	0.0368686
4933408J17Rik	0	0	0	0	0.0137257	0.00641803	0	0	0.00456018	0	0	0	0	0	0	0.00815467	0.00459038	0.0106638	0	0	0	0	0	0	0	0	0	0	0	0	0.00462098	0	0	0	0	0	0	0	0	0	0	0	0	0	0	0.00707293	0	0	0
4933408N05Rik	0	0.00936685	0.0165035	0	0	0	0	0	0.00912036	0	0.00343142	0	0	0	0	0.00407734	0	0.0106638	0	0	0	0	0	0	0	0	0	0	0	0	0.00732408	0	0	0.00447192	0.0046993	0	0	0	0	0	0.00468343	0	0.0088865	0	0	0	0	0	0.0219294
4933409D19Rik	0	0	0	0	0	0.00320901	0.00315067	0.00412588	0	0	0	0	0	0	0	0	0.00459038	0	0	0	0	0	0.00471529	0	0	0	0	0	0	0	0.00462098	0	0.0407734	0.00708782	0.00704895	0	0	0.00509667	0	0.173287	0	0	0.0088865	0	0	0	0	0	0.0066014
4933411E06Rik	0	0	0	0	0	0.00641803	0.00315067	0	0	0	0.00343142	0.0203867	0	0.0142917	0	0.00407734	0.00918076	0.0106638	0.0101189	0.00438701	0	0	0.00471529	0	0.017548	0	0.0163093	0	0	0	0.00462098	0	0	0	0.00234965	0.00577623	0.00316506	0	0	0	0.00936685	0	0.0088865	0	0	0.00707293	0.00587413	0	0
4933411K16Rik	0	0	0	0	0	0.00320901	0	0	0	0.0074532	0.00343142	0.0203867	0	0.00714585	0.00525112	0.00407734	0	0	0	0	0	0	0	0.00924196	0	0	0.00815467	0.00770164	0	0	0	0	0	0	0	0	0	0	0	0	0	0	0	0	0	0	0	0	0
4933412E12Rik	0.0353748	0.0187337	0.0165035	0	0.0480399	0.0583076	0.028356	0.0477981	0.0319213	0.0149064	0.0431843	0.0203867	0.0315067	0.0500209	0.0420089	0.012232	0.0321327	0.0213276	0.0484948	0.017548	0.0226026	0.0866434	0.0809611	0.0462098	0.026322	0.022851	0.0326187	0.0308065	0.0374674	0.127431	0.0277259	0.0437777	0.0407734	0.0339193	0.0399441	0.0346574	0.0461622	0.0662567	0.0770164	0	0.0187337	0.0360076	0.053319	0.033007	0.0346574	0.0212188	0.0792529	0	0.0198042
4933412O06Rik	0	0	0	0	0	0	0	0	0	0	0	0	0	0	0	0	0	0	0	0	0	0.00962704	0	0	0	0	0	0	0	0	0	0	0	0	0	0	0	0.01529	0	0	0	0	0	0	0	0	0	0	0
4933413C19Rik	0.00305351	0	0	0	0	0	0.00315067	0	0	0	0	0	0	0	0	0	0	0	0	0	0	0	0.00471529	0	0	0	0	0	0.00936685	0.035546	0	0	0	0	0	0	0.00316506	0.0101933	0	0	0	0.00900191	0	0	0.0115525	0.00707293	0.0176224	0	0
4933413J09Rik	0	0	0.033007	0	0	0.00320901	0	0	0	0	0.00343142	0	0	0	0	0	0	0.0106638	0.00505947	0.017548	0.00753421	0	0	0	0.00877401	0	0	0	0	0.017773	0.0138629	0	0	0.00447192	0	0	0.00316506	0	0	0	0	0.00900191	0.0088865	0.0220047	0	0	0.00587413	0	0
4933415A04Rik	0.00305351	0.0562011	0.033007	0	0.0274514	0.00320901	0.018904	0.033007	0.0136805	0.0149064	0.0308828	0.0407734	0.0315067	0.00714585	0.0262556	0.0530054	0.0256371	0.0764587	0.0455352	0.0201143	0.0226026	0.0192541	0.0282917	0.0277259	0.0438701	0.015234	0.0163093	0.0154033	0.00936685	0.0281695	0.0184839	0.0218889	0	0.0178877	0.0262454	0	0.0221554	0.0254834	0.0770164	0	0.00936685	0.0232696	0.0444325	0.033007	0.0231049	0.046575	0.0117483	0	0.0726154
4933416M07Rik	0	0	0	0	0	0	0	0	0.00456018	0	0.00686284	0	0	0	0	0.00407734	0	0	0.0202379	0	0.00753421	0	0.00943057	0	0	0	0	0.00770164	0	0	0	0	0	0	0.00234965	0.00577623	0	0	0	0	0.00936685	0	0.0088865	0	0	0.0253562	0.00587413	0	0
4933417D19Rik	0	0	0	0	0	0	0	0	0	0	0	0	0	0	0.00525112	0.00407734	0	0.0106638	0.00505947	0	0.00753421	0.00962704	0	0	0	0	0.00815467	0	0	0	0.00462098	0	0	0	0.00234965	0	0	0	0	0	0	0	0	0	0	0	0.00587413	0	0
4933417O13Rik	0	0	0.0165035	0	0	0	0	0.00412588	0	0	0	0	0	0	0	0	0	0	0	0	0	0	0	0	0	0	0	0	0	0	0.00462098	0	0	0	0.00234965	0	0	0	0	0	0	0	0	0	0	0	0	0	0
4933421O10Rik	0.0170537	0.00936685	0.033007	0.161734	0.0480399	0.0596394	0.0252054	0.0288811	0.146358	0.060892	0.0274514	0.06116	0.0157533	0.0613468	0.0315067	0.0553905	0.0210467	0.0488931	0.0303568	0.0482571	0.0226026	0.0288811	0.0282917	0.0277259	0.0438701	0.045702	0.0815467	0.0815215	0.0281006	0.035546	0.0442919	0.0364814	0.0407734	0.0339193	0.0497419	0.0404336	0.0271719	0.0802975	0.0385082	0	0.0261568	0.0592772	0.017773	0.0110023	0.0115525	0.0677938	0.0797998	0	0.033007
4933422A05Rik	0	0	0	0	0.00686284	0	0	0	0.00456018	0	0	0	0	0	0	0	0	0	0	0	0	0	0	0	0	0	0	0	0	0	0	0	0	0	0	0	0	0	0	0	0	0	0	0	0	0	0	0	0
4933423P22Rik	0	0	0	0	0.00686284	0	0	0	0.00456018	0	0	0	0	0	0	0.00407734	0	0	0	0	0	0	0	0	0	0	0	0	0.00936685	0	0	0	0	0	0	0	0	0.00509667	0	0	0	0	0	0	0	0	0	0	0.0066014
4933424G05Rik	0.00610702	0	0	0	0.00686284	0	0	0	0	0	0.00343142	0	0	0	0	0.00815467	0.00459038	0.0106638	0	0	0.0150684	0	0	0	0	0.007617	0	0.0154033	0.00936685	0	0	0	0	0.00447192	0.00234965	0	0	0.00509667	0	0	0.00468343	0	0.0088865	0	0	0	0	0	0
4933424G06Rik	0	0.00936685	0.0165035	0.0231049	0	0.00641803	0.00315067	0.00412588	0.00912036	0	0.00686284	0	0	0	0.0157533	0.00407734	0	0	0	0	0	0.00962704	0	0.00924196	0	0	0	0	0	0	0.0184839	0	0	0.00447192	0.0107731	0.00577623	0.00316506	0	0	0	0	0.00900191	0	0.0220047	0.0115525	0.0141459	0.00587413	0	0
4933425D22Rik	0.00305351	0	0	0	0.0137257	0	0	0	0	0	0	0	0	0	0.00525112	0.00815467	0	0	0	0	0	0	0	0	0	0.007617	0	0.00770164	0	0	0	0	0	0	0.00234965	0.00577623	0	0	0	0	0	0	0	0	0	0.00707293	0.00587413	0	0
4933426K07Rik	0	0	0	0	0	0	0	0	0	0	0.00343142	0	0	0	0	0	0	0	0	0	0	0	0	0	0	0	0	0	0	0	0	0.00729629	0	0	0	0	0	0	0	0	0.00468343	0	0	0	0	0	0	0	0
4933427D06Rik	0	0	0.0165035	0	0	0	0	0	0	0	0	0	0	0.00714585	0	0.00407734	0	0	0	0	0	0	0	0	0	0	0	0	0	0	0	0	0	0	0	0	0	0	0	0	0	0	0	0	0	0	0	0	0.0066014
4933427D14Rik	0.00916054	0	0.033007	0	0.0274514	0.0288811	0.0333497	0.0247553	0.0136805	0.0149064	0.0205885	0.0203867	0.0315067	0.0142917	0.0210045	0.0285414	0.0183615	0.0213276	0.0455352	0.0307091	0.00753421	0.0441396	0.00943057	0.0369678	0.00877401	0.038085	0.048928	0.0892232	0.0281006	0.017773	0.0184839	0.0291851	0.0407734	0.0223596	0.0399441	0.0404336	0.0348156	0.0254834	0	0	0.0234171	0.0540115	0.035546	0.0110023	0	0.0636564	0.0563033	0.0231049	0.0066014
4933427E11Rik	0	0.00936685	0.0165035	0	0.00686284	0	0.00315067	0.00412588	0.00456018	0	0.00343142	0.0203867	0	0	0	0	0	0.0106638	0.00505947	0.00877401	0.00753421	0	0.00471529	0.00924196	0	0	0	0.00770164	0	0	0.00462098	0	0	0.00894383	0.00704895	0	0.00633011	0.00509667	0	0	0	0.00900191	0	0.0110023	0	0.00707293	0.00587413	0	0
4933427I04Rik	0	0	0	0	0	0	0	0	0	0	0	0	0	0	0	0	0	0	0	0	0	0	0	0	0	0.007617	0	0	0	0	0	0	0	0	0	0	0	0	0	0	0	0	0	0	0	0	0.00587413	0	0
4933427J07Rik	0	0	0	0	0	0	0.00315067	0.00412588	0	0	0	0	0	0	0	0	0	0	0	0	0	0	0	0	0	0	0	0	0	0	0	0.00729629	0.0407734	0	0	0	0	0	0	0	0	0	0	0	0	0	0	0	0
4933428G20Rik	0.00305351	0	0	0	0	0	0	0	0.00912036	0	0	0	0	0	0.00525112	0	0	0	0.00505947	0	0	0	0.00471529	0	0	0	0	0.00770164	0.00936685	0	0	0	0.0407734	0.00894383	0	0	0	0.00509667	0	0	0	0	0	0	0	0	0.0176224	0	0
4933428M09Rik	0	0	0	0	0.00686284	0	0	0	0	0	0	0	0	0	0	0.00407734	0	0	0	0	0	0	0	0	0	0	0	0	0	0	0.00924196	0	0	0	0.00234965	0	0	0	0	0	0	0	0	0	0	0	0	0	0
4933428P19Rik	0.0152676	0.00936685	0.0165035	0.0231049	0.00686284	0.00320901	0.00945201	0.0123776	0.00912036	0.0074532	0.0123015	0	0.0157533	0.00714585	0	0.00407734	0.0183615	0	0.0202379	0.00438701	0.00753421	0	0.0141459	0.00924196	0.00877401	0.007617	0.0163093	0	0.00936685	0.017773	0.00462098	0.00729629	0	0.00447192	0.00939861	0.0115525	0.0158253	0.00509667	0.0385082	0	0	0.0180038	0	0.0110023	0	0.0141459	0.0176224	0	0.0132028
4933429H19Rik	0.0244281	0.0281006	0	0.0462098	0.0137257	0.0320901	0.0238977	0.0247553	0.00912036	0.0074532	0.0137257	0	0.0315067	0.0142917	0.0367578	0.0203867	0.0183615	0.0106638	0.00505947	0.00438701	0.0150684	0	0.0188611	0.0369678	0.017548	0.022851	0.024464	0.0199084	0.0187337	0	0.0231049	0.0218889	0	0.0268315	0.0140979	0.0173287	0.0189903	0.0101933	0	0	0.00468343	0	0	0.0174383	0.0577623	0.0141459	0.0597394	0.0231049	0.0066014
4933429O19Rik	0	0	0	0	0	0	0	0	0	0.0074532	0.00343142	0	0	0	0	0	0	0	0	0	0	0	0	0	0	0	0	0	0	0.017773	0	0	0	0	0	0	0	0	0	0	0	0	0	0	0	0	0	0	0
4933430I17Rik	0.012214	0.00936685	0.0165035	0.0693147	0	0.0160451	0.018904	0.00825175	0.0228009	0.0149064	0.00343142	0.0203867	0.0564752	0.00714585	0.0157533	0.012232	0.00459038	0.0106638	0.00505947	0.00438701	0.0301368	0.0192541	0.00943057	0.0184839	0	0.007617	0.00815467	0	0.0335798	0.017773	0	0.00729629	0	0.0115597	0.0164476	0.0115525	0.0158253	0	0.0385082	0	0.00468343	0	0.0088865	0	0	0	0.0234965	0.0231049	0
4933431E20Rik	0.0109467	0	0.0165035	0.0462098	0.0205885	0.0256721	0.018904	0.0123776	0.00912036	0.0223596	0.0466157	0.06116	0.0157533	0	0.0105022	0.0285414	0	0.0213276	0.0101189	0.00695324	0.0226026	0.00962704	0.0141459	0	0.00877401	0.015234	0.0163093	0	0.00936685	0.017773	0.00462098	0.00729629	0	0.00447192	0.0046993	0.0173287	0.00633011	0.00509667	0	0	0.00468343	0.0270057	0.017773	0.0110023	0	0.0495105	0.0763637	0	0.0132028
4933431J24Rik	0	0	0.0165035	0	0	0	0.00315067	0	0	0	0	0	0	0	0	0	0	0	0	0	0	0	0	0	0	0	0	0	0	0	0	0	0	0	0	0	0	0.01529	0	0	0	0	0	0	0	0	0	0	0
4933431K23Rik	0	0	0	0	0.00686284	0.00320901	0.00315067	0	0.0117879	0	0	0	0	0	0	0.00407734	0.00459038	0	0	0	0	0	0	0	0	0	0	0	0.00936685	0	0	0	0	0	0	0	0	0.00509667	0.0385082	0	0	0	0	0	0	0.0141459	0	0	0
4933433G15Rik	0.0305351	0.0523135	0.033007	0.0231049	0.0411771	0.0288811	0.028356	0.0206294	0.0136805	0.0223596	0.0411771	0.06116	0	0.0214375	0.0210045	0.036696	0.036723	0.0106638	0.0505947	0.0307091	0.0301368	0.0770164	0.064057	0.060858	0.0526441	0.022851	0.024464	0	0.0468343	0.017773	0.0184839	0.0218889	0	0.0357753	0.0328951	0.0346574	0.0284855	0.0395241	0	0	0.0187337	0.0810172	0.0088865	0.0110023	0.0231049	0.0212188	0.044555	0	0.0858182
4933433G19Rik	0.012214	0	0.0165035	0	0.0205885	0.00962704	0.00945201	0.0123776	0.0136805	0.0074532	0.00343142	0	0	0.0142917	0	0	0.00459038	0.0106638	0.0101189	0.017548	0.0150684	0	0.00943057	0.00924196	0.00877401	0.022851	0.0163093	0.00770164	0	0	0.00924196	0.00729629	0.0407734	0.00447192	0.0046993	0.0115525	0.00949517	0.0101933	0.0385082	0	0.00468343	0.00900191	0.0088865	0.0110023	0.0115525	0.00707293	0	0.0231049	0.0066014
4933434E20Rik	0.478713	0.498218	0.477361	0.460361	0.571567	0.588005	0.481352	0.558342	0.609939	0.499255	0.523544	0.475822	0.471416	0.544031	0.520864	0.546149	0.53898	0.508273	0.483626	0.3883	0.475246	0.503894	0.473062	0.463684	0.326961	0.578607	0.573758	0.653242	0.552123	0.566064	0.404744	0.500988	0.373889	0.518677	0.529174	0.529034	0.503559	0.701652	0.552201	0.173287	0.484	0.512447	0.51674	0.39256	0.439219	0.598298	0.559616	0.475089	0.591754
4933435E02Rik	0.00610702	0	0	0	0	0	0	0	0.00456018	0	0	0	0	0	0.00525112	0	0	0	0	0	0	0	0	0	0	0	0.00815467	0	0	0	0	0.00729629	0	0	0	0	0	0	0	0	0	0	0	0	0	0	0	0	0
4933435F18Rik	0	0.00936685	0	0	0.00686284	0	0	0	0	0	0.00686284	0	0	0	0	0	0	0	0	0	0	0	0	0	0	0	0	0.0231049	0	0	0	0	0	0	0	0	0	0	0	0	0	0	0	0	0	0	0	0	0
4933436I20Rik	0	0	0	0	0.0137257	0	0	0	0.00456018	0.0074532	0.00343142	0	0	0	0.00525112	0.00407734	0	0	0	0	0	0	0	0	0	0	0	0	0	0	0	0	0	0	0	0	0	0	0	0	0.00468343	0	0	0	0	0	0	0	0
4933438K21Rik	0.0725358	0.0523135	0.108675	0.12904	0.124697	0.0986929	0.104507	0.110387	0.06651	0.0565322	0.0431843	0.0815467	0.14178	0.108402	0.100663	0.0798545	0.0512742	0.144867	0.117228	0.0767369	0.106759	0.0385082	0.102581	0.0646937	0.0956972	0.07617	0.048928	0.0430133	0.112402	0.134808	0.0978258	0.129545	0.0407734	0.10547	0.0979328	0.0876249	0.116869	0.0203867	0.115525	0.173287	0.101092	0.114818	0.088865	0.182473	0.117488	0.135588	0.0881119	0.0924196	0.0935414
4933439C10Rik	0.0183211	0.0281006	0.033007	0.0693147	0.00686284	0.0435943	0.0252054	0.0691286	0.0345888	0.0416258	0.03289	0.0407734	0.0157533	0.0571668	0.0210045	0.0513131	0.0229519	0.0106638	0.0354163	0.0508233	0.0150684	0.107533	0.0546264	0.0277259	0.0753246	0.030468	0.0570827	0.0231049	0.065568	0.035546	0.030429	0.0656666	0.0407734	0.0454791	0.024871	0.0669174	0.0271719	0.01529	0.0385082	0	0.0234171	0.0180038	0.0266595	0.033007	0.0346574	0.0353647	0.0587413	0.0462098	0.0462098
4933439K11Rik	0.0213746	0.0468343	0.0165035	0.0462098	0.088578	0.0486805	0.0517006	0.0354205	0.0254684	0.0507365	0.028556	0.0407734	0.122165	0.0756385	0.069955	0.036696	0.0604549	0.0406009	0.0389601	0.0626702	0.090745	0.0559077	0.0451958	0.0277259	0.0526441	0.083614	0.0407734	0.00770164	0.0281006	0.106638	0.0457796	0.0145926	0.105398	0.0454791	0.0646051	0.0414151	0.0431836	0.0416394	0.127921	0.722593	0.0589408	0.0375373	0.035546	0.0788859	0.0115525	0.0365665	0.044555	0.0693147	0.0368686
4933439N14Rik	0.00305351	0	0.0165035	0	0.0205885	0.00320901	0.00630134	0	0.00456018	0	0	0	0.0157533	0	0.00525112	0	0.0229519	0.0106638	0.00505947	0.00877401	0.00753421	0	0.00943057	0	0.00877401	0.007617	0.0163093	0	0	0	0.00924196	0.0291851	0	0.00894383	0.00704895	0.0288811	0.0126602	0.00509667	0	0	0.0140503	0.00900191	0.0088865	0.0110023	0.0115525	0.0141459	0	0	0
4933440M02Rik	0.0152676	0	0	0	0	0	0.0126027	0.00825175	0.0319213	0.0149064	0.00343142	0.0203867	0	0.0357292	0.0210045	0.0285414	0.00918076	0.0213276	0	0	0.00753421	0	0.00471529	0.00924196	0	0	0	0	0.00936685	0	0.00924196	0.00729629	0	0.00894383	0.0117483	0.00577623	0.00949517	0	0.0385082	0	0.00936685	0	0	0.0110023	0.0231049	0.00707293	0.0117483	0	0.0066014
5031415H12Rik	0.00305351	0.00936685	0	0	0.00686284	0.00641803	0.00945201	0.00825175	0.00456018	0	0	0	0	0	0.00525112	0	0.00918076	0.0106638	0.0101189	0	0.0150684	0	0.0141459	0.00924196	0	0	0	0	0.00936685	0	0.00924196	0	0	0.00894383	0.0046993	0.0115525	0.00316506	0.0101933	0	0	0.0140503	0.0270057	0	0	0.0115525	0	0	0.0231049	0.0132028
5031425E22Rik	0.306399	0.274822	0.306717	0.34091	0.423186	0.407372	0.381833	0.313189	0.313892	0.373197	0.393784	0.473924	0.392649	0.323875	0.370633	0.362276	0.375728	0.357342	0.36181	0.334832	0.276353	0.427774	0.36941	0.402826	0.384737	0.232393	0.224333	0.45748	0.441849	0.3615	0.336289	0.371013	0.468562	0.33988	0.328164	0.310066	0.340989	0.357258	0.330591	0.346574	0.414309	0.32629	0.301473	0.300802	0.458398	0.48913	0.567928	0.423741	0.354868
5031434C07Rik	0	0.00936685	0	0	0	0	0	0.00412588	0	0	0	0	0	0	0.00525112	0	0	0	0	0.00438701	0	0	0	0	0	0	0	0	0	0	0	0	0	0	0.00234965	0	0	0	0	0	0	0	0	0	0	0	0	0	0
5031434O11Rik	0	0.00936685	0	0.0231049	0.0137257	0	0	0	0	0	0	0.0407734	0	0.00714585	0	0.00407734	0.00459038	0	0	0	0	0.00962704	0	0	0	0.007617	0.0326187	0	0.00936685	0.017773	0	0	0	0	0.00234965	0.0173287	0.00633011	0.00509667	0	0	0.00468343	0.00900191	0	0.0110023	0	0.0212188	0.0117483	0	0.0066014
5031439G07Rik	0.197216	0.127248	0.099021	0.0462098	0.16186	0.243948	0.227682	0.208397	0.266472	0.187596	0.243115	0.239643	0.173287	0.209658	0.145744	0.324888	0.18708	0.236416	0.162763	0.134922	0.212238	0.316969	0.235772	0.18641	0.182104	0.271772	0.352809	0.248353	0.132728	0.201225	0.207597	0.224396	0.350038	0.182252	0.228761	0.200752	0.205734	0.838048	0.192541	0.346574	0.190077	0.131293	0.174042	0.193476	0.196392	0.114369	0.18753	0.0828302	0.223951
5033403F01Rik	0.0048397	0	0	0	0.0137257	0.00320901	0.00315067	0	0.00456018	0.0074532	0.0137257	0	0	0	0.00525112	0.00407734	0	0.0106638	0.0151784	0.00877401	0	0.00962704	0	0.0184839	0	0.007617	0	0.00770164	0.00936685	0	0.016566	0.00729629	0	0.00894383	0.00704895	0	0.00316506	0	0.0385082	0	0	0.00900191	0	0.0110023	0.0115525	0.00707293	0.0117483	0	0.0066014
5033406O09Rik	0.0468404	0.0374674	0.0165035	0	0.13156	0.0775616	0.0522537	0.033007	0.0592823	0.060892	0.0549027	0.0203867	0.0630134	0.0714585	0.0630134	0.0700076	0.0302275	0.0319914	0.0354163	0.021935	0.0270099	0.18219	0.0424376	0.108638	0.0526441	0.205086	0.0652374	0.377393	0.289668	0.280012	0.0581549	0.0626383	0.0407734	0.0428632	0.0516923	0.0380362	0.0379807	0.141458	0.0770164	0	0.0308402	0.0540115	0.0266595	0.0788859	0.0808672	0.0212188	0.0504292	0	0.0632742
5033417F24Rik	0.00305351	0	0	0	0	0	0.00315067	0.00412588	0	0.0074532	0	0	0.0157533	0	0.00525112	0.00407734	0	0	0.00505947	0.00438701	0.00753421	0	0	0	0	0	0	0.0276101	0	0.017773	0.00462098	0.00729629	0	0	0.00704895	0.0115525	0	0	0	0	0.00468343	0	0	0	0	0.0212188	0.00587413	0	0
5033421B08Rik	0	0	0	0	0	0	0	0.00412588	0	0.0074532	0.00343142	0	0	0	0	0	0	0	0	0	0	0	0	0	0	0	0	0	0	0	0	0	0	0	0	0	0	0.0101933	0	0	0	0	0	0	0	0	0	0	0
5033426E14Rik	0	0	0	0	0.00686284	0	0	0	0	0	0.00343142	0	0	0	0	0.00407734	0	0	0	0	0	0	0	0	0	0	0	0	0	0	0	0	0	0	0.00234965	0	0	0	0	0	0	0	0	0	0	0	0	0.0231049	0.0066014
5033428I22Rik	0.00305351	0.00936685	0	0	0	0.00641803	0.00315067	0	0.00456018	0	0	0	0	0	0	0	0	0.0106638	0.0202379	0.00438701	0.00753421	0.00962704	0	0	0	0.007617	0.00815467	0.591971	0.00936685	0	0	0	0	0.00447192	0	0.00577623	0	0.01529	0	0.173287	0	0	0.0088865	0	0	0	0	0	0
5033430I15Rik	0.00610702	0	0	0.0231049	0	0.00641803	0	0	0.00456018	0.0074532	0.00686284	0	0	0.0142917	0.00525112	0.012232	0.00459038	0	0.00801907	0	0.00753421	0	0.00943057	0	0	0	0	0.287578	0	0	0	0.0145926	0	0.00894383	0.00234965	0	0.00316506	0.0101933	0.0770164	0	0.00468343	0.00900191	0	0	0	0.0536479	0.046993	0	0.0170644
5330411J11Rik	0.012214	0.0374674	0.0165035	0	0.0137257	0	0.0315067	0.0288811	0.0273611	0.0149064	0.00686284	0	0	0.00714585	0.0367578	0.024464	0.0413134	0.0106638	0.00505947	0.00438701	0	0.00962704	0.0141459	0.00924196	0.00877401	0	0	0	0.0187337	0.017773	0.0323469	0.0145926	0.0815467	0.0178877	0.0342696	0.0173287	0.0189903	0.00509667	0	0	0.00936685	0.0360076	0.0088865	0.0220047	0.0115525	0.0141459	0	0.0462098	0
5330411O13Rik	0	0	0	0	0	0	0	0	0	0	0	0	0	0	0	0	0	0	0.00505947	0	0	0	0	0	0	0	0	0.0154033	0	0	0	0	0	0	0	0	0	0	0	0	0.00468343	0	0	0	0	0	0	0	0
5330413P13Rik	0.012214	0	0	0	0	0.00641803	0.00315067	0	0.00456018	0	0	0.0203867	0	0	0	0	0	0	0.00505947	0	0.0150684	0	0.00471529	0	0	0.007617	0	0	0.00936685	0	0	0.0145926	0.0407734	0.00894383	0.00234965	0.00577623	0.00316506	0	0	0	0	0.00900191	0.0088865	0.0110023	0.0115525	0.00707293	0.00587413	0.0231049	0
5330417C22Rik	0.00305351	0.00936685	0	0.0231049	0.0177402	0.00641803	0.00630134	0	0.0136805	0	0.0102943	0	0	0.00714585	0.0105022	0.00407734	0.00459038	0.0106638	0	0.00877401	0.00753421	0.0192541	0	0.00924196	0.0350961	0.015234	0	0	0.0562011	0.017773	0.00462098	0.00729629	0.0407734	0.00447192	0.00234965	0.0288811	0.0158253	0.0254834	0	0	0.00936685	0	0	0	0.0115525	0	0	0	0
5330426L24Rik	0.00305351	0.00936685	0	0	0	0.0128361	0.00315067	0	0.00456018	0.0074532	0.00686284	0	0.04726	0	0.00525112	0.00407734	0	0	0.00505947	0.00438701	0.0150684	0	0	0	0.00877401	0.015234	0	0	0.00936685	0	0	0	0	0.00447192	0.00234965	0	0	0	0	0	0.00468343	0.0180038	0	0	0.0115525	0	0.00587413	0	0
5330429C05Rik	0	0	0	0	0	0.00320901	0.00630134	0	0	0	0.0102943	0	0	0.00714585	0	0	0	0	0.0101189	0	0.00753421	0.0537667	0.00471529	0.00924196	0	0	0	0	0	0.0281695	0.00462098	0	0	0.00447192	0	0	0.00633011	0.00807803	0	0	0.00468343	0.00900191	0.0318578	0	0	0	0	0	0
5330438D12Rik	0.0420007	0.0281006	0.033007	0.0462098	0.0480399	0.0609713	0.0220547	0.0495105	0.105659	0.0298128	0.0480399	0.06116	0.0630134	0.0643126	0.0577623	0.0822396	0.0577697	0.0746466	0.0607136	0.0570311	0.0602737	0.0673893	0.0829181	0.0554518	0.0526441	0.060936	0.0733921	0.0815215	0.0468343	0.053319	0.0693147	0.0583703	0	0.0562789	0.0473923	0.0693147	0.0588224	0.0539481	0.0770164	0	0.0495739	0.0270057	0.071092	0.07245	0.0346574	0.0677938	0.110169	0.0462098	0.0594126
5330438I03Rik	0	0	0	0	0	0.00320901	0	0	0	0.0149064	0	0	0	0	0	0	0	0	0	0	0	0	0	0	0	0	0	0	0	0	0	0	0	0.00447192	0	0	0	0	0	0	0	0	0	0	0	0	0	0	0
5330439K02Rik	0.00305351	0.0148461	0	0	0.0137257	0.00962704	0.00315067	0.00412588	0.00912036	0.0074532	0.00343142	0	0	0	0	0	0.0137711	0	0	0	0.00753421	0	0	0	0.00877401	0.007617	0.024464	0	0.00936685	0	0.00462098	0	0	0.00447192	0.0046993	0.00577623	0.00316506	0.01529	0.0385082	0	0.00936685	0.00900191	0	0.0110023	0	0.0212188	0.0176224	0	0
5430400D12Rik	0.0213746	0.0468343	0.033007	0.0693147	0.0925925	0.0679346	0.028356	0.0288811	0.0547221	0.0596256	0.0205885	0.0815467	0.04726	0.0285834	0.04726	0.0203867	0.0229519	0.0213276	0.0404757	0.0570311	0.0150684	0.0385082	0.0499111	0.0369678	0.101647	0.053319	0.0373889	0.0462098	0.0804141	0.053319	0.0231049	0.0145926	0.0407734	0.0473351	0.0305455	0.0404336	0.0189903	0.01529	0	0	0.0468343	0.0180038	0.0444325	0.0440093	0.0577623	0.0353647	0.0621774	0.0231049	0.0830784
5430402O13Rik	0	0	0	0	0	0	0	0	0.00456018	0	0	0	0	0.0142917	0	0.00407734	0	0.0106638	0.00505947	0	0	0	0	0.00924196	0	0	0	0.00770164	0	0	0	0	0	0	0	0.00577623	0	0.00509667	0.0385082	0	0	0.00900191	0	0	0.0115525	0.00707293	0	0	0
5430403G16Rik	0.254309	0.279597	0.207696	0.21187	0.256258	0.209981	0.248192	0.270582	0.304422	0.165237	0.236252	0.195406	0.298129	0.231096	0.257802	0.206638	0.24797	0.263981	0.207918	0.212067	0.318296	0.284092	0.285329	0.291047	0.194519	0.500158	0.240643	0.139938	0.355236	0.216296	0.182491	0.222608	0.170022	0.195668	0.277927	0.265272	0.275422	0.150785	0.192541	0	0.268907	0.309124	0.312393	0.245791	0.272464	0.155073	0.172346	0.313879	0.279006
5430403N17Rik	0	0	0	0	0	0	0	0	0	0	0.0102943	0	0	0	0	0	0	0	0	0	0	0	0.0141459	0	0	0	0	0	0	0	0	0	0	0	0	0	0	0	0	0	0	0.00900191	0	0	0	0	0	0	0
5430405H02Rik	0.135911	0.136615	0.214546	0.113373	0.16251	0.211255	0.121568	0.199444	0.110994	0.0894383	0.117835	0.12232	0.204793	0.169749	0.16626	0.119628	0.131216	0.168007	0.205818	0.0771454	0.166466	0.165296	0.178025	0.173332	0.133101	0.174618	0.1434	0.241368	0.171787	0.234069	0.169844	0.15873	0.12232	0.140149	0.150781	0.113127	0.15772	0.124052	0.192541	0.173287	0.157186	0.203308	0.147382	0.0614476	0.15694	0.283587	0.245725	0.188765	0.139751
5430414B19Rik	0.00305351	0	0	0	0.0137257	0.00320901	0.00315067	0	0.0136805	0.0074532	0.00343142	0	0	0	0.00525112	0	0.00918076	0.0213276	0	0	0	0.00962704	0.00943057	0	0.00877401	0.022851	0	0	0.00936685	0	0.00924196	0	0	0.00894383	0.00704895	0	0.00949517	0.0101933	0.0385082	0	0.00936685	0	0	0.0110023	0	0	0.00587413	0	0
5430416N02Rik	0.707632	0.718662	0.850499	0.731432	0.732857	0.560097	0.713169	0.736424	0.776318	0.665589	0.756555	0.789751	0.673558	0.743479	0.81007	0.704642	0.752757	0.664797	0.683349	0.655929	0.722571	0.556025	0.670982	0.753994	0.787077	0.538243	0.688897	0.589867	0.669516	0.459107	0.741112	0.737337	0.814803	0.791691	0.726084	0.706599	0.666652	0.704957	0.988878	0.997246	0.693347	0.711016	0.582793	0.77442	0.671445	0.722345	0.749594	0.656564	0.716945
5430427M07Rik	0.00305351	0.00936685	0	0	0.00686284	0	0	0	0.00456018	0	0	0	0	0	0	0.012232	0	0	0.00505947	0	0	0	0.00471529	0.0277259	0	0	0	0.00770164	0.0187337	0	0.00462098	0.00729629	0	0	0.00234965	0	0.00316506	0.00509667	0	0	0.00468343	0	0.0088865	0.0110023	0	0.00707293	0.0117483	0	0.0132028
5430427N15Rik	0.00305351	0.0187337	0	0	0.0343142	0.00641803	0.0126027	0.0123776	0.00456018	0	0.00343142	0	0	0	0.0105022	0.00407734	0	0	0.00801907	0	0	0.00962704	0.00471529	0	0.00877401	0.007617	0	0.00770164	0	0	0.00462098	0.00729629	0	0.00447192	0.0046993	0.00577623	0	0.0101933	0	0.173287	0	0	0.0088865	0	0	0	0	0	0
5430431A17Rik	0.00610702	0	0.0165035	0	0.00686284	0	0.00630134	0.0123776	0.00912036	0.0074532	0.00343142	0	0.0157533	0	0	0.012232	0.0229519	0	0.00505947	0.00438701	0.00753421	0.00962704	0.00471529	0	0.00877401	0.007617	0	0.0154033	0	0	0.0138629	0	0	0.00447192	0.0140979	0.00577623	0.00316506	0	0.0385082	0	0.00468343	0	0	0.0110023	0	0	0.00587413	0	0
5430440P10Rik	0	0	0	0	0	0	0	0	0.00912036	0	0	0	0	0	0	0	0.00459038	0	0	0	0	0	0	0	0	0	0	0	0	0	0	0	0	0	0	0	0	0	0	0	0	0	0	0	0	0	0	0	0
5530401A14Rik	0	0	0	0	0	0	0	0	0	0	0	0	0	0	0	0	0	0	0	0	0	0.00962704	0	0	0	0	0	0	0	0	0	0	0	0	0	0	0	0	0	0	0.00936685	0	0	0	0	0	0	0	0
5530601H04Rik	0.215881	0.2241	0.26686	0.423741	0.299128	0.313707	0.358708	0.350396	0.282045	0.273381	0.284617	0.309264	0.245515	0.276399	0.300703	0.203947	0.30064	0.248892	0.308636	0.250475	0.329658	0.276101	0.3105	0.338992	0.208426	0.352971	0.260336	0.187457	0.304514	0.414819	0.254161	0.311403	0.24464	0.272114	0.278902	0.282941	0.304983	0.164826	0.215067	0.346574	0.325988	0.333924	0.260729	0.2898	0.314767	0.332566	0.287391	0.346574	0.314753
5730403I07Rik	0	0	0	0.0231049	0	0	0	0.00825175	0	0.0149064	0.00343142	0	0	0	0	0	0	0	0	0	0.00753421	0	0	0	0	0	0	0	0	0	0	0	0	0.00447192	0.0046993	0	0	0.00807803	0	0	0	0	0.0088865	0.0110023	0	0	0	0	0
5730405O15Rik	0.012214	0.065568	0.0165035	0.0231049	0	0.00641803	0.00630134	0.00825175	0.0136805	0.0149064	0.0102943	0	0	0.00714585	0.0157533	0.012232	0.0229519	0	0.0151784	0	0.0226026	0	0.00943057	0	0.017548	0.007617	0	0.00770164	0.00936685	0	0.0138629	0.0115643	0	0.00894383	0.0164476	0.0149313	0.00633011	0.0131747	0.0385082	0	0.0140503	0.0180038	0.0088865	0.0110023	0	0.00707293	0	0	0.0132028
5730409E04Rik	0.0725358	0.136615	0	0.0462098	0.0549027	0.0890658	0.107658	0.0601757	0.0984313	0.0521724	0.0431843	0.0203867	0.04726	0.0899302	0.0997712	0.0944716	0.0604549	0.0808845	0.0839111	0.0464363	0.0646809	0.0730208	0.114769	0.060858	0.0350961	0.115549	0.118936	0.0539114	0.0562011	0.053319	0.0277259	0.0772309	0.0407734	0.0454791	0.0601157	0.0957985	0.0633011	0.04587	0.0770164	0.173287	0.0495739	0.0735449	0.071092	0.105457	0.11073	0.0495105	0.0587413	0.0462098	0.066014
5730414N17Rik	0.012214	0	0	0.0231049	0	0.0192541	0.018904	0.018917	0.00912036	0.0074532	0.0171571	0	0.0315067	0.00714585	0.00525112	0.0163093	0.0183615	0	0	0.0288883	0.00753421	0	0.00943057	0.0277259	0	0.007617	0.0326187	0.00770164	0	0.053319	0.00462098	0	0.0407734	0.0223596	0.0117483	0.00577623	0.00949517	0	0	0	0.00468343	0.0180038	0	0	0.0231049	0.0141459	0.0362429	0	0.0066014
5730419F03Rik	0.00916054	0	0.0165035	0.0231049	0.0137257	0	0.00630134	0.00825175	0.00912036	0	0.0102943	0.0203867	0	0.00714585	0.00525112	0.00407734	0.00918076	0.0106638	0.00505947	0	0.00753421	0.0192541	0.0282917	0	0.00877401	0.0882427	0.0652374	0	0	0.017773	0.00462098	0	0	0	0.0046993	0	0.00633011	0.01529	0.0385082	0	0.00468343	0.0180038	0	0.0110023	0	0.0212188	0.0621774	0	0.010463
5730420D15Rik	0	0.0187337	0	0	0.0205885	0	0.00315067	0	0	0.0074532	0.00686284	0	0	0.00714585	0.0105022	0.012232	0	0	0.0202379	0.017548	0	0	0.00471529	0.0184839	0.00877401	0	0.00815467	0.0231049	0	0.0459426	0.0138629	0.0145926	0.0407734	0.00447192	0.0140979	0	0.0158253	0.00509667	0.0385082	0	0.00468343	0.0180038	0.0088865	0.033007	0	0.0141459	0.0176224	0.0231049	0
5730455P16Rik	0.311528	0.338094	0.42785	0.267669	0.371771	0.35415	0.300446	0.264838	0.334026	0.339193	0.362441	0.378886	0.409613	0.297837	0.379075	0.294961	0.387159	0.272031	0.343283	0.320337	0.251189	0.336223	0.296354	0.298884	0.265385	0.195602	0.256952	0.17525	0.419396	0.266595	0.348234	0.335641	0.462364	0.302322	0.348597	0.289699	0.3207	0.433799	0.269557	0	0.310353	0.30608	0.422196	0.372425	0.301458	0.248754	0.37507	0.285111	0.371814
5730480H06Rik	0.414838	0.512896	0.41666	0.252003	0.384981	0.405494	0.476837	0.452147	0.470913	0.390805	0.48586	0.426587	0.383434	0.440216	0.477559	0.43267	0.438868	0.331588	0.4546	0.376709	0.431321	0.337859	0.459001	0.415903	0.558741	0.394939	0.398353	0.321455	0.411437	0.450365	0.34902	0.427047	0.455435	0.3948	0.400734	0.474745	0.444494	0.345333	0.50715	0.274653	0.461731	0.460642	0.46596	0.384255	0.410905	0.482843	0.368093	0.400636	0.474934
5730507C01Rik	0.0878034	0.0897809	0.132028	0.0366204	0.148134	0.193694	0.160447	0.169552	0.114004	0.0670788	0.132984	0.142707	0.110273	0.178109	0.151888	0.131168	0.164128	0.10845	0.155223	0.0998259	0.111166	0.101902	0.128915	0.157113	0.0928726	0.156223	0.0897014	0.10143	0.160828	0.088865	0.157899	0.139869	0.309264	0.112558	0.146876	0.113127	0.178857	0.140591	0.0770164	0	0.141299	0.122291	0.129609	0.250357	0.145387	0.172154	0.206593	0.192277	0.119947
5730522E02Rik	0.00305351	0	0.0165035	0.0231049	0.0137257	0.00962704	0.00945201	0.0106652	0.0209082	0.0149064	0.0137257	0.0203867	0	0.00714585	0.0157533	0.00407734	0.0229519	0.0106638	0.0151784	0.013161	0	0	0.0188611	0.0184839	0.0438701	0.022851	0	0	0.0187337	0.035546	0.00924196	0	0.0407734	0.00447192	0.00939861	0.0231049	0.00949517	0.00509667	0	0	0.00936685	0.0360076	0	0.0110023	0.0231049	0	0.0117483	0	0.0066014
5830408C22Rik	0.00916054	0.00936685	0	0	0.00686284	0.00641803	0.00315067	0.00825175	0.00456018	0.0149064	0.0102943	0	0	0.0256176	0.0105022	0.0203867	0.00459038	0.0319914	0.0101189	0.026322	0.0226026	0.0288811	0.00943057	0	0	0.022851	0	0.00770164	0	0.035546	0.0277259	0.0218889	0	0.0134158	0.0046993	0	0.00949517	0.0284647	0	0	0.0140503	0.00900191	0	0.0110023	0.0231049	0.0212188	0.0176224	0.0231049	0.0066014
5830416I19Rik	0.00305351	0	0	0	0.00686284	0	0.00630134	0.0123776	0	0.0074532	0.0102943	0	0	0	0	0	0.00459038	0	0	0	0.00753421	0	0.00471529	0	0	0	0	0	0	0	0.00924196	0.00729629	0	0	0.00234965	0.00577623	0.00316506	0.0101933	0	0.173287	0.0140503	0	0	0	0	0.00707293	0	0	0.0066014
5830418P13Rik	0.00305351	0	0.0165035	0	0.0137257	0	0.00315067	0	0.00456018	0	0.0102943	0	0	0	0	0	0	0	0.0101189	0.00438701	0	0	0.00471529	0	0	0.007617	0.0373889	0	0	0	0	0	0	0	0.0046993	0.00577623	0	0.00509667	0	0	0	0.00900191	0.0088865	0	0	0.00707293	0	0	0
5830428M24Rik	0.00305351	0	0.0165035	0	0.00686284	0.00320901	0.0126027	0.0123776	0.00456018	0	0	0	0	0	0.00525112	0	0	0.0213276	0	0.00438701	0	0	0	0.0331321	0	0.007617	0	0.0154033	0	0.0281695	0.00462098	0	0.0407734	0.00447192	0.00234965	0	0.00949517	0	0	0	0	0	0.0088865	0.0110023	0.0231049	0.0212188	0	0	0.0066014
5830444B04Rik	0	0	0	0.0231049	0	0	0.00630134	0.00825175	0.00456018	0	0	0	0.0157533	0	0.0105022	0.00815467	0	0	0	0.00438701	0	0	0.00471529	0	0	0.0120727	0	0	0	0.035546	0.00462098	0	0	0	0	0.00577623	0.00316506	0	0.0385082	0	0	0	0	0	0	0	0.00587413	0	0.0066014
5830448L01Rik	0.037161	0	0.0495105	0.0597253	0.0617656	0.0454715	0.04726	0.0453846	0.0254684	0.0565322	0.0294586	0.06116	0.0315067	0.0470551	0.0345784	0.0920865	0.0413134	0.0213276	0.0151784	0.0358415	0.0226026	0.0288811	0.0377223	0.0369678	0.0438701	0.015234	0.0129249	0.0231049	0.0374674	0.071092	0.0415888	0.0291851	0.105398	0.0178877	0.0554164	0.00577623	0.0379807	0.0662567	0	0.173287	0.0281006	0.0450096	0.0799785	0.033007	0.06452	0.0636564	0.197734	0.0462098	0.0198042
5830454E08Rik	0.012214	0	0.033007	0	0.0411771	0.0192541	0.0126027	0.0165035	0.0136805	0	0.00686284	0.0203867	0.0157533	0.0142917	0.0157533	0	0.0256371	0.0213276	0.0151784	0.021935	0.0226026	0.0192541	0.0188611	0.0184839	0.026322	0.015234	0	0.0199084	0.0187337	0.035546	0.0138629	0.0218889	0	0.00894383	0.0164476	0.0207076	0.0158253	0.0203867	0	0	0.0167899	0.00900191	0.035546	0.0110023	0.0346574	0.0212188	0.0293706	0	0.0198042
5830487J09Rik	0.00916054	0.0187337	0.0165035	0	0.0274514	0.0192541	0.00630134	0.0165035	0.0117879	0	0.00686284	0.0203867	0	0.0357292	0	0.00815467	0.00918076	0.0319914	0.0101189	0.0307091	0.0150684	0	0.03105	0	0	0.0120727	0.0163093	0.0308065	0.0281006	0.017773	0.0184839	0.0145926	0	0.0178877	0.0117483	0.00577623	0.00949517	0.0101933	0	0	0.0374674	0.0540115	0.0088865	0.033007	0.0346574	0.0141459	0.0117483	0	0.0066014
5930403N24Rik	0.00610702	0.00936685	0.0165035	0	0.0205885	0	0.00945201	0.00412588	0.0163481	0	0.0102943	0.0407734	0	0.0142917	0.0105022	0.00815467	0.00918076	0	0.0101189	0.013161	0	0	0.00943057	0.00924196	0	0.007617	0.024464	0.00770164	0	0	0.00924196	0.0145926	0.0407734	0.00447192	0.00939861	0.0115525	0.00633011	0.0101933	0.0385082	0	0.00936685	0.00900191	0	0	0	0.0141459	0.00587413	0.0462098	0.0132028
5930430L01Rik	0.0280005	0.0897809	0.0261574	0	0.102943	0.0320901	0.0441094	0.0560499	0.0600572	0	0.0363215	0.0203867	0.0157533	0.0613468	0.0293273	0.036696	0.0531794	0.0275655	0.0455352	0.0358415	0.0452053	0	0.0282917	0.0238901	0.0226805	0.060936	0.0407734	0.00770164	0.0804141	0.109658	0.0277259	0.0291851	0.0407734	0.0410071	0.0473923	0.0726936	0.056971	0.01529	0.154033	0.173287	0.0281006	0.0360076	0.053319	0.033007	0.0693147	0.0353647	0.046993	0.0462098	0.144734
6030440G07Rik	0	0	0	0	0	0.00320901	0.00315067	0	0	0	0	0	0	0	0	0	0	0	0	0	0	0	0	0	0	0	0	0	0	0	0	0	0	0	0	0	0.00316506	0	0	0	0.00468343	0	0	0	0	0	0	0	0
6030442K20Rik	0.0814121	0.12884	0.0921715	0.0597253	0.128712	0.11716	0.106886	0.0667151	0.0866434	0.0223596	0.0589173	0.0203867	0.198255	0.0970761	0.0840178	0.0757771	0.149577	0.0959742	0.0957495	0.0614181	0.135616	0.0770164	0.097064	0.16252	0.101647	0.112388	0.0944716	0.0616131	0.0749348	0.035546	0.10515	0.108765	0.146171	0.120325	0.108882	0.131437	0.110001	0.0671228	0.0385082	0	0.113994	0.0915488	0.111836	0.155902	0.145387	0.113167	0.0763637	0.105935	0.155694
6030443J06Rik	0.012214	0.0187337	0	0.0231049	0.0137257	0.0256721	0.0252054	0.033007	0.0182407	0	0.00686284	0	0.0315067	0.0142917	0.0105022	0.0285414	0.0183615	0	0.0202379	0.017548	0.0571467	0.00962704	0.0357653	0.0184839	0.026322	0.022851	0.0163093	0.0154033	0.00936685	0	0.025808	0.00729629	0.0407734	0.0249755	0.0164476	0.0231049	0.0189903	0.0101933	0.0385082	0	0.0234171	0.00900191	0.0444325	0.0110023	0	0	0.0117483	0.0231049	0.033007
6030445D17Rik	0.00305351	0.00936685	0	0	0.00686284	0.00641803	0.0126027	0.00825175	0.0136805	0.0149064	0.0137257	0	0.0157533	0.0142917	0.0157533	0.00815467	0.00459038	0	0.00505947	0.021935	0.0150684	0.00962704	0.00943057	0.00924196	0.00877401	0.022851	0.024464	0	0.00936685	0	0.0138629	0.0145926	0.0407734	0.00894383	0.0046993	0	0.00633011	0	0	0	0.00936685	0.00900191	0.0266595	0.0220047	0	0.0212188	0.0117483	0.0231049	0.0066014
6030452D12Rik	0.00305351	0.00936685	0	0	0	0.00320901	0	0.00412588	0.00456018	0	0	0	0	0.00714585	0	0	0.00459038	0	0	0.00438701	0	0	0.00471529	0	0	0	0	0	0	0	0	0	0	0.00447192	0	0	0.00316506	0	0	0	0.00468343	0	0	0	0	0	0	0	0.0132028
6030458C11Rik	0.533746	0.6442	0.614998	0.622931	0.63839	0.652479	0.605495	0.691954	0.657791	0.687779	0.712345	0.679357	0.705065	0.731084	0.649448	0.509067	0.667967	0.435612	0.665273	0.619077	0.618408	0.486103	0.597354	0.63913	0.704774	0.460915	0.557302	0.626162	0.739308	0.466483	0.630622	0.63604	0.625457	0.585427	0.592177	0.687608	0.603481	0.507577	0.731028	0.722593	0.620455	0.618263	0.670364	0.565901	0.614074	0.594681	0.455868	0.487392	0.773024
6030466F02Rik	0	0	0	0	0	0.00320901	0	0	0.00456018	0	0	0	0	0	0	0	0	0	0	0	0	0.00962704	0	0	0	0	0	0	0	0	0	0	0	0	0	0	0	0.0101933	0	0	0	0	0	0	0	0	0	0	0
6230400D17Rik	0.043268	0.0749348	0.0921715	0.0828302	0.0726429	0.119824	0.0879818	0.144095	0.0957638	0.0757984	0.11641	0.142707	0.0945201	0.100042	0.105022	0.0553905	0.100988	0.140441	0.0708326	0.0621636	0.0678079	0.105897	0.0876334	0.0423741	0.0840986	0.104771	0.159709	0.0706234	0.151461	0.0814886	0.0720178	0.0948517	0.0815467	0.0980459	0.0657902	0.0924196	0.101282	0.0335614	0	0	0.0608845	0.131293	0.0851768	0.132028	0.0808672	0.0919481	0.103296	0.0231049	0.0935414
6330403K07Rik	0.0183211	0	0.033007	0.0462098	0.0451916	0.0449262	0.0365004	0.0453846	0.0209082	0.0223596	0.0466157	0.0203867	0.04726	0.0327634	0.0450806	0.00646243	0.0394082	0.0319914	0.0354163	0.0307091	0	0.0288811	0.0141459	0.0277259	0.0402285	0.015234	0.0163093	0.0154033	0.0281006	0.053319	0.0138629	0.0437777	0	0.0223596	0.035644	0.0346574	0.033502	0.0437547	0.154033	0	0.040207	0.00900191	0.017773	0.033007	0.0577623	0.0182833	0.0352448	0.0231049	0.0594126
6330403L08Rik	0.012214	0.0187337	0	0.0231049	0.0137257	0.00641803	0.0157533	0.0206294	0.00912036	0.0149064	0.00686284	0.0203867	0	0.0357292	0.0210045	0.00407734	0.00918076	0.0213276	0	0	0.00753421	0	0.0188611	0.0277259	0.00877401	0.015234	0.00815467	0.0584166	0.0281006	0.0459426	0.025808	0.00729629	0	0.00447192	0.00939861	0.0288811	0.0158253	0.0263494	0	0	0.0187337	0.00900191	0.0266595	0.0110023	0	0.0182833	0.00587413	0.0462098	0.0066014
6330408M09Rik	0.0463215	0.0952602	0.066014	0	0.0549027	0.0454715	0.0617057	0.0206294	0.0364814	0.0447192	0.0534786	0.06116	0.0630134	0.0428751	0.0367578	0.048928	0.0650453	0.0746466	0.0463949	0.026322	0.0527395	0.0288811	0.0424376	0.0924196	0.026322	0.045702	0.024464	0.0154033	0.0562011	0.071092	0.0277259	0.0699346	0.0815467	0.053663	0.0352448	0.097658	0.056971	0.0356767	0	0	0.0523135	0.0360076	0.071092	0.066014	0.0462098	0.0353647	0.046993	0.0924196	0.066014
6330409D20Rik	0.00305351	0	0	0	0	0	0.00315067	0.00412588	0	0.0149064	0.00343142	0.0203867	0	0	0	0	0	0	0	0	0	0	0	0	0	0	0	0	0	0	0	0	0	0	0	0	0	0	0	0	0	0	0	0	0	0	0	0	0
6330410L21Rik	0.033359	0.00936685	0.0495105	0	0	0.0288811	0.0527891	0.0676327	0.0437091	0	0.0205885	0.0203867	0.0787667	0.0500209	0.0630134	0.036696	0.037503	0.0275655	0.0202379	0.017548	0.0226026	0.0152585	0.0188611	0.0238901	0.0577766	0.007617	0.0700076	0.00770164	0	0.035546	0.0138629	0.0553421	0.12232	0.0410071	0.0726204	0.0173287	0.0467	0.00509667	0.0385082	0	0.0436586	0	0.0407443	0.0834523	0.06452	0	0.0210585	0.0597253	0
6330411D24Rik	0.00305351	0	0	0	0	0	0	0.00412588	0.00456018	0	0	0	0	0	0	0	0	0	0.00505947	0	0	0	0	0	0	0.007617	0	0	0	0	0	0	0	0	0	0	0	0	0	0	0	0	0	0	0	0	0.00587413	0	0.0066014
6330415G19Rik	0	0.0187337	0	0	0	0.00320901	0.00315067	0	0	0	0.00343142	0	0.0157533	0	0	0	0	0	0	0	0	0	0	0.00924196	0	0.007617	0.0129249	0	0.00936685	0	0	0	0	0	0.00234965	0	0.00316506	0.00509667	0	0	0.00468343	0	0	0	0.0115525	0	0.0117483	0	0
6330418K02Rik	0.0755893	0.108515	0.0921715	0.0924196	0.125864	0.0981476	0.0690778	0.11934	0.133795	0.116158	0.126705	0.105398	0.0722285	0.0399093	0.089269	0.100241	0.0872172	0.0639828	0.109208	0.0877401	0.121828	0.182914	0.0895905	0.0793419	0.0526441	0.099021	0.105251	0.17525	0.0804141	0.017773	0.0951227	0.154462	0.146171	0.0831104	0.105558	0.0702962	0.0828293	0.133379	0.115525	0	0.0796183	0.086283	0.138496	0.0880187	0.115525	0.0748667	0.0763637	0.0693147	0.0698756
6330562C20Rik	0.0262143	0.0281006	0.0495105	0.0231049	0.00686284	0.00641803	0.0270484	0.0395464	0.0326961	0.0074532	0.0191644	0	0	0.0113259	0.0157533	0.0309264	0.0137711	0.0106638	0.0202379	0.0245013	0.037671	0.0192541	0.0188611	0	0.026322	0.022851	0.024464	0.0154033	0.00936685	0.035546	0.0231049	0.0145926	0.0815467	0.0313034	0.0187972	0.0115525	0.0221554	0.023368	0	0	0.0234171	0.0142677	0.035546	0.0550117	0	0.0353647	0.044555	0	0.0396084
6430503K07Rik	0.00305351	0	0.0165035	0	0	0.00320901	0.00315067	0	0	0	0	0	0	0	0.00525112	0	0	0	0	0	0	0	0	0	0	0	0	0.0199084	0.0187337	0	0.00462098	0	0	0	0	0	0	0.00509667	0.0385082	0	0	0	0	0	0	0.0141459	0.0117483	0	0
6430531B16Rik	0.00610702	0	0	0	0.0617656	0.0128361	0.018904	0.0123776	0.00912036	0.0149064	0.0480399	0.0407734	0.0157533	0.00714585	0.0210045	0.00815467	0.0137711	0	0.018138	0.013161	0.0452053	0.178022	0.116726	0.11631	0.00877401	0.030468	0.0163093	0.0154033	0.0187337	0.017773	0.00462098	0.0218889	0.0407734	0.0134158	0.0154724	0.0231049	0.0221554	0.04587	0.0385082	0	0.00468343	0.0270057	0.0266595	0.033007	0.0115525	0.0831415	0.0587413	0	0.0726154
6430548M08Rik	0.0188399	0	0	0.0462098	0.0205885	0.0179222	0.0144457	0	0.0273611	0.0447192	0.0294586	0	0	0.0512352	0.00525112	0.0203867	0.011866	0.0426552	0.0117477	0.0614181	0.00753421	0.110633	0.00943057	0.00924196	0.00877401	0.0120727	0.0163093	0.214037	0.0187337	0.0281695	0.0138629	0.00729629	0	0.0178877	0.0185784	0.00577623	0.0126602	0.0896248	0	0	0.0140503	0	0.017773	0	0	1.0132	0.721319	0	0.0132028
6430550D23Rik	0	0.0187337	0.0165035	0.0231049	0	0.00962704	0.00945201	0.00412588	0	0.0074532	0.00343142	0.0730855	0	0.0142917	0.0105022	0.0203867	0	0	0.00505947	0.00438701	0.00753421	0	0.00471529	0.0184839	0.017548	0.007617	0	0	0.00936685	0.017773	0	0	0	0.00447192	0.00704895	0.00577623	0.00633011	0.01529	0.0385082	0	0.0140503	0	0	0.0110023	0	0	0.00587413	0	0.0132028
6430562O15Rik	0.0152676	0.00936685	0.0165035	0.0231049	0.00686284	0.00641803	0.00630134	0	0.0117879	0	0.00343142	0	0.0315067	0	0	0.0203867	0.00459038	0.0319914	0	0	0.0226026	0	0.00471529	0	0.00877401	0.015234	0.0163093	0	0	0	0.00462098	0.00729629	0.0407734	0.00447192	0	0	0.0158253	0.00509667	0	0	0.00468343	0	0.017773	0.0220047	0	0	0.0117483	0.0231049	0.0066014
6430571L13Rik	0	0	0	0	0.0137257	0.00641803	0.018904	0.00825175	0	0.0074532	0.00686284	0	0	0.0142917	0.0262556	0	0.00459038	0	0.0101189	0	0.00753421	0.00962704	0.0141459	0.00924196	0.0139065	0.022851	0.0163093	0.0462098	0.0187337	0	0.00924196	0	0	0	0.0164476	0.0149313	0.0158253	0	0	0	0.00468343	0.0180038	0	0	0.0231049	0.0353647	0.0176224	0	0
6430573P05Rik	0.00789321	0	0	0	0	0.00320901	0.00630134	0.00412588	0	0	0.00686284	0	0	0	0.00525112	0	0.00459038	0	0.0151784	0.00438701	0	0.00962704	0.0141459	0	0	0.030468	0	0.00770164	0	0	0.00462098	0	0	0.00447192	0.00234965	0	0.00316506	0.00509667	0	0	0.00468343	0	0	0	0	0.0141459	0.00587413	0	0.0066014
6430590A07Rik	0.0824448	0.104627	0.033007	0.0828302	0.0754913	0.0826478	0.0887541	0.0783916	0.0828581	0.0918377	0.0946556	0.125784	0.0945201	0.118514	0.0682645	0.0880092	0.111729	0.117302	0.09403	0.0797116	0.0753421	0.0441396	0.0782029	0.171762	0.0768155	0.083787	0.110781	0.0815215	0.174802	0.17773	0.0739357	0.0772309	0.12232	0.0901982	0.114956	0.0669174	0.0796642	0.0560634	0.154033	0.173287	0.072991	0.122291	0.113346	0.0944546	0.0991774	0.0960855	0.130229	0.184839	0.099021
6430628N08Rik	0	0	0	0	0.00686284	0	0	0	0.00456018	0	0	0	0	0.0142917	0	0	0	0	0	0	0	0	0	0	0	0	0	0	0	0	0	0	0	0	0	0	0	0	0	0	0	0	0	0	0	0.0424376	0.0293706	0	0
6430710C18Rik	0	0	0	0	0	0	0	0	0	0	0	0	0	0	0.00525112	0	0	0	0	0	0	0	0.00471529	0	0	0	0	0	0	0	0	0	0	0	0	0	0	0.00509667	0	0	0	0	0	0.0110023	0	0.00707293	0	0	0
6530401F13Rik	0.00305351	0	0	0	0	0	0	0	0	0	0	0	0	0	0.00525112	0.00407734	0	0	0.00505947	0	0	0	0	0	0	0	0	0	0	0	0	0	0	0	0.0046993	0	0.00316506	0	0	0	0	0	0	0	0	0	0	0	0
6530402F18Rik	0.00305351	0	0	0	0	0.00320901	0	0	0.00912036	0.0074532	0	0	0	0	0	0.00407734	0	0.0106638	0	0.00438701	0	0	0	0	0	0.015234	0	0	0.288077	0	0	0	0	0.00447192	0.0046993	0	0	0.00509667	0	0	0.00936685	0	0	0	0	0	0	0	0.0132028
6530409C15Rik	0.00305351	0.00936685	0	0.0231049	0.00686284	0	0.00315067	0	0.00456018	0	0.00343142	0	0	0	0	0.00407734	0	0	0	0.00438701	0	0	0.00471529	0	0	0	0.00815467	0	0	0	0	0	0	0	0.00234965	0	0.00316506	0.00509667	0	0	0	0	0	0	0	0.00707293	0	0	0.0132028
6530413G14Rik	0.0109467	0	0	0	0.0108773	0.00320901	0.00315067	0.00412588	0	0	0	0	0	0.00714585	0.00525112	0	0	0.0106638	0	0.00438701	0.00753421	0	0	0	0	0.007617	0	0	0	0	0.00462098	0.00729629	0	0.00894383	0.0046993	0.00577623	0	0	0	0	0.0140503	0	0	0	0	0.00707293	0.0117483	0.0231049	0.0066014
6530437J22Rik	0.0109467	0.00936685	0.0591644	0.0231049	0.0137257	0.0385082	0.00315067	0.0147911	0.0136805	0.0074532	0.00686284	0	0.0315067	0.0142917	0.0210045	0.00407734	0.00459038	0.0106638	0.0101189	0.00438701	0.00753421	0.00962704	0.00943057	0.00924196	0	0.022851	0.00815467	0.00770164	0.0281006	0.035546	0.0138629	0	0	0.0134158	0.0234965	0.0115525	0.0126602	0	0.0385082	0	0.00468343	0.00900191	0	0.033007	0.0115525	0.0282917	0.044555	0	0.0132028
6720427I07Rik	0.193933	0.267047	0.279023	0.334833	0.296919	0.390839	0.226081	0.313647	0.365335	0.245395	0.2852	0.409665	0.261269	0.363364	0.240573	0.381044	0.322894	0.354537	0.36524	0.353871	0.266258	0.293719	0.250719	0.341258	0.331276	0.237421	0.294341	0.280468	0.423115	0.423561	0.274835	0.289897	0.268491	0.27617	0.275178	0.289161	0.267002	0.192041	0.253575	0.173287	0.268547	0.305388	0.3164	0.305369	0.28598	0.338854	0.369187	0.331321	0.364824
6720468P15Rik	0	0	0	0.0231049	0	0	0	0	0	0	0.00343142	0	0	0	0	0	0	0	0	0	0.00753421	0	0	0	0	0	0	0	0	0	0	0	0	0	0	0	0	0	0	0	0	0	0	0	0	0	0	0	0.0066014
6720483E21Rik	0.00305351	0	0	0	0	0	0	0.0165035	0	0	0	0	0	0	0	0	0.00459038	0	0.0101189	0	0	0	0.00471529	0	0.00877401	0	0	0.00770164	0	0	0	0	0.0407734	0	0.0046993	0	0.00316506	0	0	0	0	0	0	0	0	0	0	0	0
6720489N17Rik	0.0542148	0.0374674	0.0825175	0.0693147	0.0823541	0.0743526	0.110037	0.0808051	0.0456018	0.0267194	0.0912242	0.101933	0.150995	0.0643126	0.0660851	0.0652374	0.103674	0.0595569	0.075892	0.0402285	0.0797493	0.0288811	0.0687723	0.0570222	0.122836	0.107932	0.120321	0.0430133	0.0991478	0.053319	0.0508308	0.0656666	0.186944	0.100998	0.0812626	0.0808672	0.0815157	0.03058	0.0385082	0.173287	0.0796183	0.0952849	0.0622055	0.066014	0.0991774	0.0919481	0.0763637	0.0462098	0.139751
6820408C15Rik	0	0.00936685	0.0165035	0	0.00686284	0.00320901	0.00630134	0.00412588	0.00912036	0.0074532	0	0	0	0	0.0105022	0.00815467	0.00459038	0.0106638	0.0101189	0.00438701	0	0	0.00471529	0.00924196	0	0	0	0	0	0.017773	0.00462098	0	0	0.00447192	0.00234965	0	0.00633011	0.00509667	0	0	0	0	0.0088865	0	0.0183102	0	0.0176224	0	0.0396084
7330404K18Rik	0	0	0	0	0	0	0.00315067	0.00412588	0.00456018	0	0	0	0	0	0	0	0	0	0	0	0	0	0	0	0	0	0	0	0	0	0	0	0	0	0	0	0	0	0	0	0	0	0	0.0110023	0	0	0	0	0
7420426K07Rik	0	0	0	0	0	0	0	0	0	0.0149064	0	0	0	0.00714585	0.0121927	0.00407734	0	0	0	0	0	0.00962704	0	0	0	0	0	0	0	0	0.00462098	0	0	0	0.0046993	0	0	0	0	0	0	0	0	0	0	0	0	0	0
7420700N18Rik	0.00305351	0	0	0	0	0	0	0	0	0	0	0	0	0	0	0	0	0	0	0	0	0	0	0	0	0	0	0	0	0	0	0	0	0	0.00234965	0	0	0	0	0	0	0	0	0	0	0	0.00587413	0	0
7530414M10Rik	0.00305351	0	0	0	0	0	0	0	0	0	0	0	0	0	0	0	0	0	0	0	0	0	0	0	0	0	0	0	0	0	0	0	0	0	0	0	0.00316506	0.0101933	0	0	0	0	0	0	0.0231049	0.00707293	0	0	0
8030423F21Rik	0	0	0	0.0231049	0	0	0	0	0	0	0.00343142	0	0	0	0	0	0	0	0	0	0	0	0	0	0	0.015234	0	0	0	0	0	0	0	0	0	0	0	0	0	0	0	0	0	0.0110023	0	0	0	0	0
8030453O22Rik	0.0213746	0.0374674	0.033007	0	0.0205885	0.0243403	0.0157533	0.0123776	0.00456018	0.0074532	0.0102943	0	0	0	0.0105022	0.0163093	0	0	0	0.00438701	0.037671	0.00962704	0.00943057	0.00924196	0.017548	0	0	0.0154033	0.0484259	0.017773	0.00462098	0	0.0407734	0.00894383	0.0164476	0.0231049	0.0126602	0.03058	0	0	0.0187337	0.00900191	0.0266595	0	0	0.0141459	0.0234965	0.0231049	0.0066014
8030456M14Rik	0.0412523	0.0468343	0.158185	0.105935	0.11382	0.0871887	0.0590904	0.0955962	0.0364814	0.0521724	0.0898	0.12232	0.0814436	0.054201	0.0525112	0.0594678	0.0669505	0.0808845	0.0505947	0.0533896	0.122973	0.0962704	0.0978653	0.0700999	0.0438701	0.045702	0.118936	0.0738199	0.0804141	0.0814886	0.0508308	0.0845272	0.12232	0.0909581	0.0591406	0.0693147	0.0524923	0.0590447	0.0770164	0.346574	0.0702514	0.0592772	0.111836	0.0944546	0.0462098	0.0353647	0.0822378	0.0462098	0.0528112
8030462N17Rik	0.54653	0.600381	0.683251	0.477388	0.651881	0.660658	0.67896	0.633558	0.552653	0.572093	0.740045	0.587783	0.546039	0.65207	0.648684	0.659183	0.645361	0.651328	0.563611	0.657493	0.549272	0.712433	0.720038	0.682909	0.544834	0.465235	0.420818	0.405594	0.736292	0.553694	0.681401	0.511312	0.584684	0.628977	0.618423	0.580483	0.592372	0.510051	0.503564	0.549306	0.590228	0.607585	0.633308	0.614476	0.504608	0.586916	0.703283	0.591176	0.685575
8030474K03Rik	0.0157864	0	0.0165035	0.271596	0.0932315	0.0403853	0.0315067	0.018917	0.0364814	0.113064	0.0609245	0.06116	0.0249685	0.0285834	0.0315067	0.0496209	0.00918076	0.0213276	0.0484948	0.0332753	0.0527395	0.0248855	0.033007	0.0184839	0.026322	0.022851	0.0455435	0.00770164	0.0187337	0.017773	0.021187	0.0145926	0	0.0313034	0.0117483	0.0264838	0.00949517	0.01529	0.0385082	0	0.00936685	0.0502753	0.0318578	0.033007	0.0115525	0.0282917	0.0563033	0	0.12767
8430419K02Rik	0.00305351	0	0	0	0	0	0.00315067	0	0.00456018	0	0	0	0	0	0	0	0	0.0106638	0	0	0	0	0.00943057	0	0	0	0	0	0.0187337	0	0	0	0	0	0	0	0	0.00509667	0	0	0	0	0	0.0110023	0	0	0	0	0.0066014
8430423G03Rik	0	0	0	0	0	0	0	0.00412588	0	0	0	0	0	0	0	0	0	0	0.00505947	0	0	0	0	0	0	0	0	0	0.0335798	0	0	0	0	0	0	0	0.00316506	0	0	0	0	0.00900191	0	0	0	0	0	0	0
8430429K09Rik	0.0895896	0.121769	0.0495105	0.0732408	0.0823541	0.145496	0.105043	0.084931	0.110219	0.101251	0.136416	0.146171	0.0630134	0.125659	0.0849101	0.125398	0.0761313	0.10845	0.112168	0.0866648	0.0571467	0.1613	0.0895905	0.120146	0.0855895	0.103477	0.14817	0.0738199	0.155349	0.188127	0.098611	0.0656666	0.0407734	0.0767825	0.101615	0.0934011	0.0809778	0.16396	0.0770164	0	0.101092	0.0952849	0.0762903	0.099021	0.0924196	0.193373	0.18897	0.138629	0.156816
8430430B14Rik	0	0	0.0165035	0	0.0343142	0.00962704	0.018904	0.0288811	0.00912036	0.0074532	0.00686284	0	0	0.00714585	0.0157533	0.00407734	0.0137711	0.0106638	0.0151784	0.00438701	0.0452053	0.0288811	0.03105	0.0184839	0	0	0.00815467	0	0.0187337	0.017773	0.0138629	0.0218889	0	0.00894383	0.0225213	0.0115525	0.0253204	0	0	0	0.00468343	0	0.017773	0.0110023	0.0115525	0	0.00587413	0	0
8430432A02Rik	0.00305351	0.00936685	0.0165035	0.0231049	0	0.00320901	0	0	0.0136805	0	0.00343142	0	0	0.00714585	0	0	0.00459038	0	0	0	0	0	0.00471529	0	0	0.007617	0	0.0385082	0.00936685	0	0	0	0	0	0	0	0	0.0101933	0	0	0	0	0	0.0110023	0	0	0	0	0.0066014
9030025P20Rik	0.28456	0.259976	0.316371	0.34091	0.29407	0.20835	0.275184	0.308679	0.370939	0.188863	0.198506	0.317726	0.421479	0.384136	0.312501	0.388506	0.325152	0.265793	0.257181	0.220096	0.264411	0.267198	0.283372	0.331155	0.270361	0.244466	0.165865	0.290195	0.385648	0.325954	0.246837	0.334962	0.533186	0.266883	0.259529	0.317805	0.292328	0.183097	0.314609	0.51986	0.296135	0.242375	0.314571	0.354987	0.301458	1.237	1.04701	0.231049	0.282749
9030404E10Rik	0.00610702	0.0187337	0.033007	0	0.00686284	0.00962704	0.00630134	0.00412588	0.00456018	0	0.00686284	0	0.0315067	0.00714585	0.0105022	0.00407734	0.0183615	0.0106638	0	0	0.00753421	0	0	0	0	0.007617	0.00815467	0	0	0.0945867	0.00462098	0.0291851	0	0	0.0140979	0.00577623	0.0126602	0	0	0	0.00936685	0.00900191	0.0088865	0	0.0462098	0.0282917	0.0352448	0.0462098	0
9030407P20Rik	0	0.00936685	0	0	0	0.00320901	0	0	0.00456018	0.0149064	0	0	0	0.0142917	0	0	0.00459038	0	0.0101189	0.00438701	0	0.00962704	0.00943057	0	0.00877401	0.007617	0	0.00770164	0	0.035546	0	0	0.0407734	0	0.0046993	0.00577623	0.00316506	0.0182714	0	0	0.00468343	0	0.0088865	0.0220047	0	0.0112103	0.0117483	0	0.0066014
9030612E09Rik	0	0	0	0	0	0	0	0	0	0	0	0	0	0	0	0	0	0	0	0	0	0	0	0	0	0	0	0.0892232	0	0	0	0	0	0	0	0	0	0	0	0	0	0	0	0	0	0	0.0117483	0	0.0066014
9030622O22Rik	0.00789321	0	0	0	0	0	0	0	0	0.0074532	0	0	0	0	0	0	0	0	0	0	0	0	0	0	0	0.015234	0.024464	0	0	0	0	0	0	0	0	0	0	0	0	0	0	0	0	0	0	0	0	0	0
9030624G23Rik	0.251201	0.345165	0.290214	0.161734	0.282027	0.277129	0.350275	0.335288	0.281621	0.223035	0.24538	0.251569	0.245515	0.325755	0.3226	0.223947	0.389417	0.390152	0.395515	0.313714	0.346586	0.144406	0.328922	0.313532	0.343692	0.25395	0.258338	0.306907	0.29126	0.276992	0.340397	0.292412	0.322391	0.343512	0.289456	0.364449	0.311313	0.305334	0.154033	0.346574	0.312297	0.364665	0.306671	0.267795	0.448808	0.454008	0.544979	0.336984	0.275026
9130008F23Rik	0.0274816	0.00936685	0.0165035	0.0231049	0.00686284	0.00962704	0.0126027	0.00412588	0.0182407	0.0757984	0.00343142	0.113859	0	0.00714585	0.0105022	0.0285414	0.00918076	0.0213276	0.0101189	0.021935	0.0150684	0.0537667	0.0707293	0.0462098	0	0.0273067	0.0163093	0.00770164	0.0281006	0	0.00924196	0.0145926	0	0.0223596	0.0046993	0	0.0126602	0.283698	0	0	0.0187337	0.0360076	0	0.033007	0.0115525	0.0495105	0.131227	0	0.0132028
9130017K11Rik	0.00305351	0.0148461	0	0	0	0.00320901	0.00945201	0.00412588	0.00456018	0	0.00343142	0	0.0315067	0.00714585	0.00525112	0.00407734	0	0.0106638	0.0202379	0.013161	0.0150684	0	0.00471529	0	0.00877401	0.015234	0.00815467	0	0	0.017773	0	0	0	0	0.0046993	0	0.0126602	0.0203867	0.0385082	0	0	0	0	0.0110023	0	0.0141459	0.0176224	0	0
9130019O22Rik	0.0213746	0.0281006	0.0825175	0	0.0451916	0.0352992	0.0383434	0.0371329	0.050162	0.0670788	0.0623487	0.06116	0.0157533	0.0357292	0.0398295	0.036696	0.0420934	0.053319	0.0565139	0.0464363	0.037671	0.0593981	0.0754446	0.0184839	0.0350961	0.0501577	0.0781622	0.0276101	0.0374674	0.0281695	0.0369678	0.0583703	0	0.0402473	0.0483675	0.0495887	0.0316506	0.0356767	0.0385082	0	0.0515177	0.0630134	0.0622055	0.039443	0	0.0253562	0.0352448	0.0462098	0.0528112
9130019P16Rik	0.00305351	0	0	0	0	0.00320901	0.00315067	0	0.00722771	0.0298128	0.00686284	0.0407734	0	0	0	0	0	0.0213276	0.0101189	0	0	0.0192541	0	0	0.00877401	0	0.00815467	0	0.0187337	0	0	0.00729629	0	0	0	0	0	0.01529	0	0	0	0	0	0	0	0	0.00587413	0	0.0066014
9130023H24Rik	0.00916054	0.0281006	0.0165035	0	0.0205885	0.0128361	0.0126027	0.0123776	0.0319213	0.0298128	0.00343142	0	0.0315067	0.0285834	0.0157533	0.00407734	0.00459038	0.0169017	0.0151784	0.00877401	0	0	0.00943057	0	0.017548	0	0.024464	0.0154033	0.00936685	0.035546	0.00924196	0.0145926	0	0	0.0117483	0.0173287	0.00316506	0.0101933	0	0	0.00936685	0.00900191	0	0	0.0115525	0.0141459	0.0210585	0	0.0198042
9130024F11Rik	0.0180368	0.00936685	0	0	0.00686284	0.00962704	0.00630134	0.0123776	0.0182407	0.0267194	0.0171571	0	0	0	0.00525112	0.0163093	0	0	0	0.00438701	0.00753421	0.00962704	0.00943057	0.00924196	0.00877401	0.0577747	0.0326187	0	0.00936685	0	0.0119451	0	0	0.00894383	0	0.0115525	0.00316506	0.0356767	0	0	0	0.00900191	0.0088865	0.0110023	0	0.0212188	0.044555	0	0.0198042
9130204K15Rik	0	0	0	0	0	0.00641803	0.00315067	0	0.00912036	0.0074532	0.00343142	0	0.0157533	0	0	0.00407734	0	0	0.00505947	0	0.0150684	0.0192541	0	0	0	0	0.00815467	0	0	0	0	0	0	0	0.0046993	0.00577623	0	0	0	0	0	0	0	0	0.0115525	0	0	0	0.0066014
9130204L05Rik	0.0353748	0.024213	0	0	0.0589173	0.0243403	0.0365004	0.0354205	0.0273611	0.0223596	0.0308828	0.0203867	0.0630134	0.0714585	0.0420089	0.0431585	0.036723	0.0319914	0.0556542	0.0464363	0.0602737	0.0979063	0.033007	0.0369678	0	0.053319	0.0326187	0.050715	0.00936685	0.035546	0.0673968	0.0364814	0.0815467	0.0249755	0.0305455	0.0288811	0.0303369	0.0335614	0	0	0.0710472	0.0360076	0.0266595	0.0110023	0.0115525	0.0353647	0.00587413	0.0231049	0.0500714
9130209A04Rik	0	0	0	0	0	0	0	0	0	0	0	0	0	0	0	0	0	0	0	0	0	0	0	0	0	0	0	0	0	0	0	0.00729629	0	0	0	0	0	0.0101933	0	0	0	0	0	0.0110023	0	0	0	0	0
9130221H12Rik	0.0244281	0.00936685	0.066014	0.0462098	0.0137257	0.0647256	0.0459524	0.0165035	0.0456018	0.0149064	0.0397529	0.0203867	0.0630134	0.0214375	0.0105022	0.0285414	0.0459038	0.0213276	0.0505947	0.00877401	0.0527395	0.0288811	0.0282917	0.0462098	0.017548	0.045702	0.0407734	0.0924196	0.0281006	0.088865	0.03505	0.00729629	0.0407734	0.0473351	0.0281958	0.0173287	0.0443108	0.0284647	0.0770164	0	0.0234171	0	0.0266595	0.0220047	0.0231049	0.00707293	0.0293706	0.0231049	0.0594126
9130230L23Rik	0.012214	0	0.0165035	0	0.0274514	0.00962704	0.00945201	0.0123776	0.0182407	0.0074532	0.00686284	0.0203867	0.0315067	0.00714585	0.0105022	0.012232	0.00918076	0.0275655	0.0151784	0.00438701	0.0150684	0.0192541	0.00471529	0.0385383	0.026322	0.007617	0.0163093	0	0.0429467	0.017773	0.00924196	0.00729629	0.0815467	0.00447192	0.00939861	0.0115525	0.0189903	0.0101933	0.061034	0	0	0	0.0088865	0.0638945	0.0183102	0	0.0401373	0.0231049	0
9130230N09Rik	0.00305351	0.0468343	0.033007	0	0.024603	0.0192541	0.028356	0.0247553	0.0182407	0.0416258	0.0294586	0.0203867	0	0.0142917	0.0157533	0.00815467	0.0137711	0.0319914	0.0404757	0.00877401	0.0452053	0.0192541	0.0377223	0.0277259	0.0350961	0.007617	0.0163093	0.00770164	0.00936685	0.017773	0.0231049	0.0145926	0.0407734	0.0134158	0.0154724	0.0149313	0.0284855	0.00509667	0.0385082	0.173287	0.0187337	0	0	0.0284406	0.0231049	0	0.0680516	0.0231049	0.0066014
9130401M01Rik	1.34624	1.36618	1.24767	1.17571	1.36832	1.26031	1.34636	1.30329	1.2083	1.28736	1.25299	1.2316	1.3724	1.30866	1.29312	1.0175	1.27678	1.26902	1.37639	1.31537	1.30332	1.33235	1.36719	1.30364	1.41216	1.18459	1.1567	1.03781	1.23105	1.22236	1.2237	1.28786	1.37471	1.35548	1.31112	1.26966	1.32953	1.37806	1.30847	0.722593	1.354	1.24118	1.29992	1.32442	1.38806	1.08475	0.862176	1.38057	1.16593
9130410C08Rik	0.00305351	0	0	0	0	0	0	0	0	0	0	0	0	0	0	0	0	0	0	0	0	0	0	0	0	0	0	0	0.00936685	0	0.00462098	0	0	0	0	0	0	0	0	0	0.00468343	0	0	0	0	0.142002	0.0411189	0	0
9130604C24Rik	0.0152676	0.0187337	0.0165035	0.0462098	0.0343142	0.0417172	0.0315067	0.0288811	0.0456018	0.037266	0.0343142	0.0815467	0.0315067	0.0214375	0.0157533	0.0350038	0.0302275	0.0319914	0.0434353	0.0438701	0.0420783	0.0385082	0.0404806	0.0462098	0.0139065	0.015234	0	0.0462098	0.0468343	0	0.0277259	0.0291851	0	0.0134158	0.046993	0.0346574	0.033502	0	0	0	0.0187337	0.0180038	0.0088865	0.033007	0.0462098	0.0495105	0.0528672	0	0.0264056
9230102O04Rik	0	0	0	0	0	0	0	0	0	0	0	0	0	0	0	0	0	0	0.00505947	0	0	0	0	0	0	0	0	0	0	0	0	0	0	0	0	0	0	0.00509667	0	0	0	0	0	0	0	0	0	0	0
9230104M06Rik	0	0	0	0	0	0.00962704	0.00315067	0	0.00912036	0.0074532	0	0.0407734	0	0	0.0105022	0.00815467	0.00918076	0.0106638	0.00505947	0.00438701	0	0	0.00471529	0	0.026322	0.007617	0	0.0231049	0	0.017773	0	0.0218889	0	0.00447192	0.0046993	0	0.00316506	0	0	0	0	0.00900191	0.0088865	0.0110023	0.0231049	0	0.00587413	0	0
9230105E05Rik	0.012214	0.00936685	0.0165035	0.0231049	0.00686284	0.00641803	0.00945201	0.0123776	0.00456018	0	0.0171571	0.0203867	0	0.00714585	0.0105022	0	0.00459038	0.0213276	0.0101189	0	0	0	0.00471529	0.00924196	0	0	0	0	0.00936685	0	0	0	0	0.00894383	0.0258462	0.00577623	0.00316506	0	0	0	0	0	0.0088865	0.0220047	0	0	0.0117483	0	0
9230111E07Rik	0	0.00936685	0	0.0231049	0.00686284	0.00320901	0.00315067	0.0147911	0.00456018	0	0.00343142	0.0203867	0.0157533	0	0.0105022	0.00407734	0.00459038	0	0	0.00438701	0	0	0.00471529	0.00924196	0	0	0.00815467	0	0.0281006	0	0.00462098	0.00729629	0	0.00894383	0.00704895	0.00577623	0.00316506	0	0	0	0	0	0.0088865	0	0	0	0.00587413	0	0.0066014
9230112E08Rik	0.0152676	0	0.0165035	0	0	0.0192541	0.00945201	0.0123776	0.0273611	0.0074532	0.00686284	0.0203867	0.0315067	0.0285834	0.0157533	0.0163093	0.0137711	0	0.0101189	0	0.0150684	0.0192541	0	0.00924196	0.026322	0.007617	0.024464	0.0154033	0.0187337	0.017773	0.021187	0.0218889	0.0407734	0	0.0140979	0.00577623	0.0158253	0.00509667	0.0385082	0	0.00468343	0.00900191	0.0088865	0.0220047	0.0183102	0.0141459	0.0293706	0	0.0066014
9230114K14Rik	0.204645	0.0897809	0.324488	0.285111	0.44233	0.192546	0.240934	0.207939	0.172519	0.193662	0.241254	0.280417	0.234833	0.192401	0.265945	0.271569	0.222251	0.159957	0.310653	0.282497	0.17016	0.1613	0.242883	0.227213	0.305614	0.185397	0.327254	0.386945	0.279429	0.2059	0.23681	0.147166	0.309264	0.216932	0.227125	0.220922	0.185891	0.287628	0.0770164	0.51986	0.180358	0.211472	0.20741	0.250357	0.190521	0.25985	0.503371	0.234975	0.249742
9230116L04Rik	0.00610702	0.00936685	0.033007	0	0	0.00641803	0.00315067	0.00412588	0	0	0.0102943	0	0	0.0214375	0.0105022	0.00407734	0.00918076	0.0106638	0.0101189	0	0.00753421	0.0152585	0.00471529	0.0184839	0.017548	0.007617	0.0326187	0.0308065	0.0187337	0	0.00462098	0.0145926	0	0.00447192	0.0046993	0.0346574	0.00949517	0.0101933	0	0	0.0140503	0.00900191	0	0	0	0	0.00587413	0.0366204	0.0132028
9230116N13Rik	0.0700012	0.065568	0.066014	0.0366204	0.0629318	0.0660574	0.0711577	0.0725534	0.0463767	0.0447192	0.0720599	0.0407734	0.103735	0.054201	0.0774796	0.0536982	0.036723	0.0213276	0.0434353	0.0840986	0.037671	0.0770164	0.0809611	0.0739357	0.0928726	0.053319	0.0618529	0.0616131	0.0468343	0.088865	0.056237	0.0364814	0.0407734	0.0402473	0.0634406	0.0693147	0.0828293	0.03058	0.231049	0	0.040207	0.0360076	0.0444325	0.0834523	0.0346574	0.0424376	0.0563033	0.0693147	0.0528112
9230117E06Rik	0	0	0	0	0	0	0	0	0	0	0.00343142	0	0.0157533	0	0	0.00407734	0.0183615	0	0	0	0	0.00962704	0.00471529	0	0	0	0	0	0.00936685	0	0	0	0	0.00447192	0.00234965	0	0.00316506	0	0	0	0.00468343	0.00900191	0	0	0	0	0.0117483	0	0
9330020H09Rik	0.0488562	0.108515	0.0495105	0.105935	0.097246	0.0903977	0.0819174	0.099021	0.0847508	0.142877	0.08093	0.0526988	0.157533	0.0500209	0.142672	0.0917069	0.097178	0.0746466	0.104149	0.0859194	0.0979447	0.0826478	0.103736	0.125552	0.062909	0.15809	0.114165	0.0539114	0.0897809	0.088865	0.0905017	0.106416	0.0407734	0.0678386	0.124355	0.0495887	0.0968031	0.0845281	0.154033	0	0.098352	0.1673	0.071092	0.105457	0.152145	0.103158	0.168363	0.0693147	0.0792168
9330102E08Rik	0.0183211	0	0	0.0231049	0.00686284	0.00641803	0.00315067	0.00825175	0	0	0.0102943	0	0	0.00714585	0.00525112	0.00407734	0.0137711	0.0106638	0.0101189	0.00877401	0.0150684	0	0.0141459	0	0	0	0.00815467	0.00770164	0.0148461	0	0.00924196	0	0	0.00447192	0.0046993	0.0173287	0.00316506	0	0.0385082	0	0.00936685	0.00900191	0.0088865	0	0.0115525	0.0141459	0	0	0.0170644
9330104G04Rik	0.012214	0.0187337	0	0	0.0137257	0.0160451	0.00945201	0.0123776	0.00912036	0.0223596	0.0137257	0	0.0157533	0.0142917	0.0262556	0.012232	0.0137711	0.0106638	0.0151784	0.00877401	0.0150684	0.00962704	0.00943057	0.0277259	0.017548	0.007617	0	0.0231049	0.0187337	0.017773	0.00924196	0.00729629	0	0	0.00704895	0.03226	0.0158253	0	0	0	0.00468343	0.0180038	0.017773	0	0.0115525	0	0.00587413	0	0.0132028
9330111N05Rik	0	0	0	0	0	0	0	0	0	0	0	0	0	0	0	0.00407734	0	0	0	0	0	0	0	0	0	0	0.00815467	0	0	0	0	0	0	0	0	0	0.00316506	0	0	0	0	0	0	0	0	0	0	0	0
9330121J05Rik	0.00305351	0	0	0	0	0.00320901	0	0	0.00912036	0	0	0	0.0157533	0	0	0.00407734	0.00459038	0	0	0.00877401	0	0	0.00471529	0	0	0.007617	0	0	0	0	0	0	0	0	0	0	0	0	0	0	0.00468343	0	0	0	0	0.00707293	0	0	0.0066014
9330136K24Rik	0.0140002	0.00936685	0.0591644	0	0.00686284	0.00641803	0.0293703	0.0247553	0.0345888	0.024759	0.0191644	0.0203867	0	0.0142917	0.0105022	0.00815467	0.0137711	0.0275655	0.0252973	0.00877401	0.00753421	0	0.0121888	0	0.017548	0	0	0.00770164	0.00936685	0.017773	0.030429	0.0407495	0	0.0205036	0.0265492	0.0271508	0.0113466	0	0.115525	0	0.0140503	0.00900191	0.017773	0.0110023	0	0	0.0234965	0.0231049	0.0066014
9330151L19Rik	0.0140002	0	0.033007	0.0231049	0.0274514	0.0275493	0.0126027	0.0165035	0.0456018	0.0149064	0.00343142	0	0	0.0357292	0.0420089	0.0326187	0.0183615	0.0319914	0.0202379	0.021935	0.0150684	0.00962704	0.0263347	0.0277259	0.026322	0.038085	0.024464	0.0308065	0.00936685	0.017773	0.0184839	0.0188606	0	0.00894383	0.0187972	0.0231049	0.0126602	0.0101933	0	0	0.032784	0.0502753	0.035546	0.0550117	0.0115525	0.0536479	0.0704895	0	0.0264056
9330154J02Rik	0.00305351	0	0	0.0366204	0	0	0	0	0.00456018	0	0	0.0407734	0	0	0	0	0	0	0	0	0	0	0.00471529	0	0	0	0	0.00770164	0	0	0	0.00729629	0	0	0	0	0.00316506	0.0254834	0	0	0.00936685	0	0	0	0	0	0	0	0
9330159F19Rik	0.024947	0.00936685	0.0165035	0.0231049	0.0286175	0.0160451	0.0572474	0.0354205	0.0273611	0.0298128	0.0191644	0	0.0315067	0.0756385	0.0210045	0.0309264	0.0413134	0	0.120576	0.1086	0.00753421	0	0.0188611	0.00924196	0.026322	0.007617	0.0163093	0.00770164	0.00936685	0.017773	0.00924196	0.00729629	0	0.0410071	0.0229206	0.0288811	0.0606739	0.01529	0.061034	0	0.0542573	0.00900191	0.035546	0.0110023	0.0115525	0.165081	0.0411189	0.0693147	0
9330159M07Rik	0.0890707	0.0843017	0.191192	0.0462098	0.0343142	0.0788935	0.103972	0.109686	0.210893	0.142877	0.0877928	0.113859	0.14178	0.111368	0.079659	0.0635451	0.131216	0.125352	0.086011	0.0288883	0.0678079	0.0673893	0.113968	0.16409	0.0753246	0.07617	0.024464	0.00770164	0.132728	0.088865	0.0793419	0.0583703	0.268491	0.100998	0.102409	0.118903	0.111315	0.0335614	0.0995422	0.346574	0.127248	0.109553	0.143694	0.250357	0.0577623	0.0819396	0.0411189	0.184839	0.0775987
9330160F10Rik	0.00789321	0	0	0	0.0137257	0.00641803	0.00630134	0.0123776	0.0136805	0	0.0205885	0	0	0.00714585	0.00525112	0.0203867	0	0.0106638	0	0.00438701	0.0226026	0.00962704	0	0	0	0	0.00815467	0.0584166	0.0616804	0	0.0184839	0	0.0407734	0	0.0046993	0.0115525	0.00633011	0.0101933	0	0.173287	0.00936685	0.00900191	0	0	0.0346574	0.0424376	0.080798	0.0231049	0.010463
9330162012Rik	0.012214	0.00936685	0	0.0597253	0.00686284	0.0128361	0.0157533	0.0123776	0.00456018	0.0074532	0.00343142	0	0.0315067	0	0.0105022	0	0.00918076	0.0213276	0.00505947	0.00438701	0	0.0192541	0.0141459	0	0.026322	0.007617	0	0.0231049	0.00936685	0.035546	0.0119451	0	0	0.00447192	0.00704895	0.0173287	0.0126602	0.0284647	0	0	0.00468343	0	0.0266595	0	0.0346574	0	0	0	0
9330171B17Rik	0.00789321	0.00936685	0	0	0	0	0	0	0	0	0	0	0	0	0	0	0	0	0	0	0	0	0	0	0	0	0	0	0	0	0	0	0	0	0	0	0	0	0	0	0	0	0	0	0	0	0.00587413	0	0
9330175E14Rik	0	0	0	0.0231049	0	0.00320901	0.00315067	0	0	0	0.00343142	0	0	0	0	0.00815467	0	0	0.00505947	0	0	0	0	0	0	0	0	0.00770164	0	0	0	0	0	0.00447192	0	0	0	0	0	0	0	0	0	0	0	0	0.00931027	0	0
9330179D12Rik	0	0	0	0	0	0	0	0	0	0	0.00343142	0	0	0	0	0	0	0	0	0	0	0	0	0	0	0	0	0.0231049	0	0	0	0	0	0	0	0	0	0	0	0	0	0	0	0	0	0	0	0	0
9330182L06Rik	0.00916054	0	0	0.0231049	0	0.0288811	0.018904	0.00412588	0.00456018	0.0298128	0.0102943	0.134246	0	0.0214375	0.00525112	0.00815467	0.00459038	0.0106638	0.00505947	0.0201143	0.00753421	0.0192541	0	0	0.0314545	0.015234	0.00815467	0.0154033	0	0.017773	0.0231049	0.0145926	0.0407734	0.0178877	0.00939861	0.0173287	0.00633011	0.0203867	0.0385082	0	0.00936685	0.00900191	0.035546	0	0	0.0282917	0.0293706	0	0.0407302
9330182O14Rik	0	0	0	0	0	0	0	0	0	0	0.00343142	0	0	0	0	0	0.00459038	0	0	0	0	0	0.00471529	0	0	0.007617	0	0	0	0	0	0.00729629	0	0	0	0	0	0	0	0	0	0	0	0	0	0	0	0	0
9330185C12Rik	0.27765	0.568378	0.48421	0.225386	0.323204	0.153005	0.384377	0.445534	0.374724	0.0683452	0.135575	0.0203867	0.483026	0.362536	0.381934	0.0985489	0.433498	0.305644	0.258041	0.133101	0.422063	0.136414	0.368879	0.423424	0.432923	0.053319	0.0815467	0.0255843	0.434074	0.0459426	0.315102	0.344046	0.427788	0.383503	0.348697	0.363477	0.361126	0.0722194	0.215067	0.346574	0.408897	0.549146	0.359163	0.468552	0.390839	0.0212188	0.046993	0.198355	0.26905
9330188P03Rik	0	0	0	0	0	0	0	0	0	0	0	0	0	0	0	0	0	0	0	0	0	0	0	0	0	0	0	0	0	0	0	0	0	0	0	0	0	0.0161561	0	0	0	0	0	0	0	0.00707293	0	0	0
9330198I05Rik	0	0	0	0	0.0137257	0	0	0	0	0	0.00343142	0	0	0	0	0	0	0	0	0	0	0	0	0	0	0	0	0	0	0	0	0	0	0	0	0	0	0	0	0	0	0	0	0.0110023	0	0.00707293	0	0	0
9330198N18Rik	0	0	0	0	0	0	0	0	0	0	0.00343142	0	0	0	0	0	0	0	0.0101189	0	0.00753421	0	0	0	0	0	0	0	0	0.017773	0	0	0	0	0	0.00577623	0	0	0	0	0	0	0	0	0	0	0.00587413	0	0
9430002A10Rik	0.00610702	0	0.0165035	0	0.0137257	0.00320901	0.0126027	0	0.00456018	0.0074532	0.00686284	0.0203867	0	0	0.00525112	0.00815467	0.00459038	0	0	0.00877401	0.0150684	0.00962704	0.00943057	0	0	0	0	0.00770164	0.0187337	0	0.00924196	0.00729629	0	0.0178877	0.0046993	0.0115525	0.00316506	0.01529	0	0	0	0	0	0	0.0115525	0	0.0117483	0	0.0132028
9430015G10Rik	0.207359	0.237355	0.276514	0.119451	0.320355	0.237719	0.289151	0.215948	0.299511	0.206863	0.246546	0.236179	0.311206	0.293657	0.259493	0.205945	0.266677	0.20181	0.252593	0.197831	0.363636	0.18219	0.174828	0.25808	0.178305	0.215865	0.263721	0.204169	0.265455	0.18075	0.234975	0.287726	0.186944	0.191956	0.281075	0.249906	0.258821	0.169922	0.231049	0.346574	0.234615	0.305388	0.245134	0.307238	0.218628	0.232875	0.226211	0.354426	0.190944
9430018G01Rik	0.00305351	0.00936685	0	0	0	0	0	0	0.00456018	0.0074532	0	0	0	0.00714585	0.00525112	0.00407734	0	0	0	0.00438701	0	0	0.00471529	0	0	0	0	0.0231049	0.00936685	0	0.00462098	0	0	0	0	0	0.00316506	0	0	0	0	0	0	0	0	0	0	0	0.0066014
9430021M05Rik	0	0	0	0	0	0	0	0	0	0.0074532	0	0	0	0	0	0	0	0.0106638	0	0	0	0	0	0	0	0	0	0	0	0	0	0	0	0	0	0	0	0	0	0	0.00742306	0	0	0	0	0.00707293	0	0	0
9430037G07Rik	0.00305351	0.0187337	0.0165035	0	0.0137257	0.00641803	0.00630134	0.0206294	0.00912036	0.0074532	0.0102943	0.0407734	0	0.0142917	0.0210045	0.00407734	0.0137711	0.0106638	0.0101189	0.013161	0.00753421	0	0.0188611	0.00924196	0.026322	0.007617	0.00815467	0	0	0.017773	0	0.0145926	0	0.00894383	0.00939861	0.0115525	0.0126602	0.0101933	0	0	0.0140503	0.00900191	0.0088865	0.0220047	0.0115525	0.0353647	0.0117483	0	0.0132028
9430038I01Rik	0.587751	0.689994	0.667989	0.348348	0.505429	0.715648	0.663036	0.591497	0.663261	0.750594	0.76117	0.739316	0.723213	0.683619	0.624908	0.549154	0.679729	0.597381	0.50159	0.593916	0.750073	0.569647	0.669247	0.594642	0.692059	0.636828	0.556358	0.250832	0.750266	0.462127	0.596401	0.729116	0.455435	0.622809	0.668883	0.630921	0.685964	0.395533	0.673579	0.575646	0.434862	0.705783	0.633831	0.617839	0.606636	0.414379	0.438793	0.801271	0.562879
9430041J12Rik	0	0.00936685	0	0.0231049	0.0137257	0	0.00945201	0.00825175	0	0	0	0	0	0	0.00525112	0	0	0	0.00505947	0	0.0150684	0	0	0.00924196	0	0	0	0.0231049	0	0	0.00924196	0.0145926	0	0.00447192	0.00939861	0.00577623	0.00316506	0.0539481	0	0	0	0	0	0.0110023	0	0.00707293	0.00587413	0	0
9430060I03Rik	0.00916054	0.00936685	0.0165035	0.0231049	0.0205885	0.0160451	0.0238977	0.0395464	0.0273611	0.0298128	0.02402	0.0407734	0.04726	0.0214375	0.0262556	0.036696	0.0275423	0.0488931	0.0312165	0.017548	0.0301368	0.0288811	0.0263347	0.0184839	0.026322	0.022851	0.0326187	0.0308065	0.0374674	0.053319	0.0184839	0.0145926	0.0407734	0.0383912	0.0352448	0.0173287	0.0126602	0.0356767	0.115525	0	0.032784	0.00900191	0.017773	0.033007	0.0231049	0.0424376	0.0528672	0	0.0462098
9430065F17Rik	0.012214	0.0187337	0.0165035	0	0.0274514	0.0128361	0.018904	0.018917	0.0319213	0.0149064	0.0137257	0	0.0157533	0.0285834	0.0105022	0.024464	0.0229519	0.0106638	0.0413355	0.00877401	0.00753421	0	0.0141459	0.0277259	0.00877401	0.007617	0.00815467	0.00770164	0.0187337	0.035546	0.0138629	0.0145926	0	0.0134158	0.0117483	0.0115525	0.0126602	0.01529	0.0385082	0	0.0140503	0	0.0444325	0.0110023	0	0.0141459	0.0234965	0	0.0302672
9430069I07Rik	0	0	0	0.0462098	0.00686284	0	0.00945201	0.0271687	0.00456018	0.0074532	0.0171571	0	0.0315067	0	0.0105022	0	0.00459038	0	0.0151784	0	0.0150684	0	0.00747355	0.00924196	0.00877401	0	0	0	0.0187337	0	0.00924196	0.00729629	0	0.00447192	0.0117483	0.00577623	0.00633011	0.00509667	0	0	0	0	0	0.0110023	0.0115525	0.00707293	0	0.0231049	0.0066014
9430078K24Rik	0	0	0	0	0	0.00320901	0	0	0	0	0	0	0	0	0	0	0	0	0	0	0	0	0	0	0	0.007617	0	0	0	0	0	0	0	0	0	0	0	0	0	0	0	0	0	0	0	0	0	0	0
9430085M18Rik	0.00610702	0.00936685	0	0	0.00686284	0.00641803	0.00945201	0.0106652	0	0.0149064	0	0.0203867	0.04726	0.00714585	0	0	0.00459038	0	0	0.00438701	0.0150684	0.0248855	0.00943057	0.0184839	0.00877401	0	0	0	0	0	0.0184839	0.00729629	0	0.00447192	0.00939861	0	0.00633011	0.01529	0.0385082	0	0.00936685	0.00900191	0.0088865	0.0110023	0	0	0	0.0231049	0
9430091E24Rik	0	0	0	0.0231049	0	0.00962704	0.00630134	0	0.00456018	0.0074532	0.00343142	0	0.0315067	0	0.0105022	0.00407734	0.00459038	0.0106638	0	0	0.00753421	0.00962704	0.00471529	0	0	0.007617	0.0210795	0	0.00936685	0	0.00462098	0	0	0.00447192	0.0046993	0	0.00949517	0	0	0	0.00468343	0	0.017773	0.0110023	0	0.0324291	0.0234965	0	0.0066014
9430097D07Rik	0	0	0	0	0.00686284	0	0.00315067	0	0	0	0	0	0	0	0	0	0.00459038	0	0	0	0	0	0	0	0.00877401	0	0	0	0.00936685	0	0.00924196	0	0	0	0	0.0115525	0	0	0	0	0.00468343	0	0.0088865	0	0	0.0212188	0.0176224	0	0
9530018F02Rik	0.012214	0	0.0165035	0	0.00686284	0.0147132	0.0126027	0.0123776	0.00456018	0	0.00686284	0	0	0.0142917	0.0210045	0.024464	0.0137711	0.0213276	0.0151784	0.026322	0	0.0192541	0.0121888	0.0423741	0.0226805	0.022851	0.024464	0.0199084	0	0.017773	0.0138629	0.00729629	0	0.00447192	0.0164476	0.0173287	0.00949517	0.0101933	0	0	0.0140503	0	0.0088865	0.0110023	0.0115525	0.0395021	0.0117483	0	0.0198042
9530026P05Rik	0.0152676	0	0	0	0	0.00320901	0	0	0.00722771	0	0.00686284	0	0.0157533	0.0142917	0	0.00407734	0.00918076	0.0169017	0	0	0	0.0537667	0.00471529	0.00924196	0	0.007617	0.00815467	0	0	0	0	0	0	0.00447192	0.00704895	0.00577623	0	0	0	0	0	0	0	0.0110023	0	0.0182833	0	0	0
9530034E10Rik	0.012214	0.0281006	0.0495105	0.0693147	0.0343142	0.0192541	0.028356	0.0230429	0.0228009	0.0447192	0.0397529	0	0.0315067	0	0.0210045	0.0285414	0.0459038	0.0319914	0.0202379	0.00877401	0.0301368	0.14041	0.0188611	0.0462098	0.0350961	0.022851	0.0570827	0.0231049	0.00936685	0.017773	0.0369678	0.0291851	0	0.0134158	0.024871	0.0231049	0.0221554	0.0662567	0.0770164	0.274653	0.0234171	0.0270057	0.017773	0.0220047	0.0346574	0.0212188	0.0587413	0.0462098	0.0396084
9530036M11Rik	0	0	0	0	0	0	0.00630134	0	0	0.0074532	0.0171571	0.0203867	0	0	0	0.00407734	0.00918076	0	0	0	0	0	0.00471529	0	0	0	0.00815467	0	0	0	0	0	0	0.00447192	0.0046993	0	0	0	0	0	0	0	0.0088865	0	0	0	0	0	0
9530036O11Rik	0	0	0	0	0	0.00641803	0	0	0	0	0.00343142	0	0	0	0	0	0	0	0	0.00438701	0	0	0	0	0	0	0	0	0	0	0	0	0	0	0	0	0	0	0	0	0	0	0	0.0110023	0	0	0	0	0.0066014
9530046B11Rik	0.00789321	0	0	0.0231049	0.0137257	0	0.0126027	0	0.00456018	0	0.00343142	0	0	0	0.0157533	0.012232	0.00459038	0	0.00505947	0	0.00753421	0	0.00943057	0.00924196	0	0	0.00815467	0.0815215	0.00936685	0	0	0.00729629	0	0	0.0164476	0	0	0	0	0	0	0	0.0088865	0.0220047	0	0.00707293	0.0234965	0	0.0066014
9530051G07Rik	0.00305351	0.00936685	0.0165035	0.0231049	0	0.00320901	0.00315067	0.00412588	0.00456018	0.0149064	0.02402	0	0	0.0142917	0.00525112	0	0	0.0106638	0.0101189	0.013161	0.00753421	0.00962704	0.00943057	0	0	0.015234	0.00815467	0.0552201	0.0187337	0.0281695	0.00732408	0.0145926	0.0407734	0.0178877	0.00939861	0	0.0189903	0.01529	0	0	0	0	0	0.0220047	0	0.0141459	0.0117483	0	0.0198042
9530052C20Rik	0	0.0187337	0.0165035	0	0	0	0.00315067	0	0	0.0074532	0	0	0	0	0.00525112	0.00407734	0	0.0106638	0	0	0	0	0	0	0.00877401	0	0	0.00770164	0	0	0.00462098	0	0	0	0.00234965	0.00577623	0.00949517	0	0	0	0.00468343	0.00900191	0	0	0.0115525	0.00707293	0.00587413	0	0.0066014
9530052E02Rik	0	0	0	0	0	0	0	0	0	0.0074532	0	0	0	0	0	0	0	0	0	0	0	0	0	0	0	0	0	0	0	0	0	0	0	0	0	0	0	0.00509667	0	0	0	0	0	0.0110023	0	0.00707293	0.00587413	0	0
9530053A07Rik	0.0402145	0.0374674	0.0591644	0	0.146452	0.0275493	0.020747	0.0395464	0.0364814	0	0.0211716	0.0934722	0.0157533	0.0428751	0.0367578	0.012232	0.0229519	0.0213276	0.0354163	0.021935	0.0678079	0.121156	0.0467138	0.112474	0.0402285	0.022851	0.0815467	0.0975164	0.00936685	0.035546	0.0138629	0.0218889	0.0646243	0.0178877	0.0375944	0.0335446	0.0271719	0.0985688	0.0770164	0	0.00936685	0.0592772	0.0444325	0.0678836	0.0529676	0.0919481	0.122915	0.0828302	0.0132028
9530059O14Rik	0.0335886	0.0335798	0.0495105	0.0828302	0.0451916	0.0256721	0.0409587	0.0247553	0.0209082	0.0639854	0.0534786	0	0.0315067	0.0786043	0.0210045	0.0407734	0.0413134	0.0702207	0.0202379	0.0394831	0.0226026	0.0481352	0.0235764	0.0277259	0.00877401	0.203083	0.184173	0.0308065	0.0187337	0.088865	0.0508308	0.0145926	0.12232	0.0268315	0.0575473	0.0495887	0.0284855	0.362415	0.0385082	0.173287	0.0140503	0.0270057	0.0088865	0.0110023	0.0231049	0.103158	0.0739257	0.0231049	0.04347
9530062K07Rik	0.0183211	0.00936685	0	0	0.00686284	0.0128361	0.0220547	0	0.0117879	0.0074532	0.00686284	0	0.0157533	0.00714585	0.0262556	0.012232	0.00918076	0.0213276	0.0151784	0.013161	0.00753421	0	0.0188611	0.00924196	0	0	0.00815467	0.0154033	0.0187337	0	0.00924196	0.00729629	0	0.0237992	0.0117483	0.0173287	0.0113466	0.0254834	0.0385082	0	0.00468343	0.0270057	0	0.0110023	0	0	0.00587413	0	0.0066014
9530068E07Rik	0.207698	0.218621	0.297063	0.327395	0.252243	0.330051	0.276548	0.271687	0.302529	0.363525	0.428159	0.441612	0.320421	0.257799	0.310717	0.244027	0.24641	0.274645	0.290588	0.271335	0.267538	0.311337	0.311301	0.259651	0.199652	0.15809	0.195099	0.291504	0.351349	0.394026	0.295048	0.209804	0.24464	0.235163	0.261832	0.311048	0.254823	0.387838	0.583291	0.346574	0.288872	0.348868	0.368877	0.239355	0.281185	0.331364	0.31488	0.281185	0.315875
9530077C05Rik	0.043268	0.0897809	0.0495105	0.0462098	0.089217	0.10057	0.0756161	0.0890569	0.112112	0.0298128	0.0534786	0.101933	0.0630134	0.0655269	0.0660851	0.0553905	0.0688557	0.0853104	0.0303568	0.0526441	0.0452053	0.0288811	0.0499111	0.0423741	0.017548	0.038085	0.110781	0.0231049	0.0468343	0.017773	0.0635611	0.0729629	0.163093	0.0741666	0.0695144	0.0346574	0.0443108	0.0641414	0.115525	0.173287	0.131496	0.0630134	0.129609	0.0834523	0.0876249	0.1863	0.369533	0.0462098	0.0962812
9530080O11Rik	0	0	0	0	0	0.00320901	0	0.00412588	0	0.0074532	0	0	0	0	0	0.00815467	0	0	0	0	0	0	0	0	0	0	0.0129249	0.00770164	0	0.017773	0	0	0	0.0134158	0.0046993	0	0	0	0	0	0	0.00900191	0	0	0	0	0.00587413	0	0
9530082P21Rik	0.0213746	0.0187337	0	0.0231049	0.0411771	0.0449262	0.0220547	0.0371329	0.0254684	0.0223596	0.0377456	0.0203867	0	0.00714585	0.0262556	0.0285414	0.0229519	0.0319914	0.0252973	0.017548	0.0150684	0.0288811	0.0377223	0.0277259	0.026322	0.015234	0.00815467	0.0770164	0.0187337	0.053319	0.0184839	0.0407495	0.0815467	0.051807	0.0211469	0.0635385	0.0379807	0.0314461	0	0	0.0140503	0.0360076	0.0266595	0.066014	0.0231049	0.0282917	0.0293706	0.0231049	0.0264056
9530097N15Rik	0.0201073	0.00936685	0.0165035	0.105935	0.0274514	0.0352992	0.0126027	0.0206294	0.0273611	0.0074532	0.0343142	0.0407734	0	0.0214375	0.0210045	0.06116	0.0183615	0.0319914	0.0151784	0.013161	0.0150684	0	0.0169041	0.0184839	0.00877401	0.068553	0.00815467	0.00770164	0.00936685	0.088865	0.0277259	0.0145926	0	0.0178877	0.0187972	0.0173287	0.0126602	0.0254834	0.0385082	0	0.0421508	0.0592772	0	0.0110023	0.0231049	0.099021	0.106732	0	0.033007
9630001P10Rik	0	0	0	0	0	0	0	0.00412588	0	0	0	0	0	0	0.00525112	0	0.00459038	0	0	0.00438701	0	0	0	0	0	0	0	0	0	0	0	0	0.0407734	0.00447192	0	0	0.00316506	0	0	0	0.00468343	0	0	0	0	0	0	0	0
9630013D21Rik	0.00305351	0	0	0	0	0	0	0	0	0	0	0	0	0	0	0	0	0	0	0	0	0	0	0	0	0	0	0.0738199	0	0	0.00462098	0	0	0	0	0.013412	0	0	0.0385082	0	0	0	0	0	0	0.00707293	0	0	0
9630014M24Rik	0.00610702	0.0374674	0.0165035	0.0231049	0.0343142	0.0160451	0.0157533	0.0206294	0.0136805	0.0223596	0.0171571	0	0	0.0357292	0.0105022	0.00407734	0.00459038	0	0.0151784	0.026322	0.0571467	0.0288811	0.0141459	0.0184839	0	0.038085	0	0	0.00936685	0.035546	0.00924196	0.00729629	0	0.0178877	0.0234965	0.0173287	0.0126602	0.0203867	0	0	0.0214733	0.0180038	0.0266595	0.039443	0.0115525	0.0436395	0.0176224	0.0462098	0.0198042
9630028B13Rik	0.00305351	0	0	0	0	0.00641803	0	0	0	0	0	0	0	0	0	0.00407734	0	0.0106638	0.0101189	0.00438701	0	0	0	0	0	0	0	0.00770164	0	0	0	0	0	0	0	0	0	0	0	0	0	0.00900191	0	0	0	0.00707293	0	0	0
9830132P13Rik	0	0	0	0	0	0	0	0	0	0	0.00686284	0	0	0	0	0	0	0	0	0	0	0	0	0	0	0	0	0	0	0	0	0	0	0	0	0	0	0	0	0	0	0	0	0	0	0.00707293	0	0	0
9830144P21Rik	0.00916054	0.00936685	0	0	0.0137257	0	0.0252054	0.00412588	0.0136805	0	0.0274514	0	0	0.00714585	0.0105022	0.0203867	0	0	0.00505947	0	0.00753421	0.0192541	0.00471529	0.00924196	0	0.007617	0	0.00770164	0.0187337	0	0.00462098	0.00729629	0	0.0223596	0.00704895	0.00577623	0.00316506	0.0101933	0	0	0.0140503	0.0360076	0.0088865	0.0220047	0	0.00707293	0.0293706	0	0.0066014
9830166K06Rik	0	0	0	0	0	0	0	0	0	0	0	0	0	0.00714585	0	0	0	0	0	0.00438701	0	0	0	0	0	0	0	0	0	0	0	0	0	0	0	0	0	0.00509667	0	0	0	0	0	0	0	0.00707293	0	0	0
9930004E17Rik	0	0.00936685	0.0165035	0	0	0	0.00315067	0.00412588	0.0136805	0.0074532	0.00343142	0	0	0	0.00525112	0.00815467	0.00459038	0	0	0.00877401	0	0	0	0	0	0	0	0	0	0	0.00924196	0.00729629	0	0	0.00234965	0.00577623	0	0.00509667	0	0.173287	0	0.00900191	0.0088865	0	0	0.0212188	0.0528672	0	0.0066014
9930012K11Rik	0.145072	0.227988	0.174689	0.0462098	0.159012	0.211858	0.186723	0.155772	0.127342	0.0832516	0.1796	0.101933	0.173287	0.198332	0.206578	0.162787	0.153823	0.221326	0.336983	0.269184	0.176993	0.285728	0.193689	0.112474	0.0701921	0.153634	0.0897014	0.163635	0.12884	0.305161	0.249971	0.180619	0.0407734	0.140149	0.160797	0.169474	0.178619	0.185212	0.0770164	0.51986	0.176822	0.224371	0.20741	0.133898	0.223423	0.374877	0.358331	0.0462098	0.147474
9930014A18Rik	0.00610702	0	0.033007	0	0.00686284	0.00962704	0.00315067	0.00825175	0.0163481	0.0149064	0.0137257	0	0	0.00714585	0.00525112	0.0285414	0	0	0.0463949	0.0394831	0	0.00962704	0.0235764	0	0.00877401	0	0	0.0154033	0	0	0	0	0	0.00894383	0.00234965	0.0115525	0.00633011	0	0	0	0	0.00900191	0	0	0.0529676	0	0.00587413	0.0231049	0.0462098
9930021J03Rik	0.367474	0.44113	0.371194	0.408074	0.331233	0.468946	0.426483	0.396482	0.374717	0.429204	0.479833	0.431585	0.422689	0.474194	0.424465	0.667546	0.408056	0.454135	0.396366	0.435598	0.411845	0.498262	0.461397	0.391303	0.467862	0.378995	0.384669	0.260559	0.426835	0.379273	0.494626	0.423626	0.373889	0.39252	0.431061	0.489676	0.475425	0.365336	0.560765	0.549306	0.453244	0.488339	0.442321	0.491581	0.51029	0.419186	0.516155	0.414151	0.476552
9930022D16Rik	0	0	0	0	0	0	0.00315067	0	0.00456018	0	0.00343142	0	0	0	0	0.00407734	0	0.0106638	0	0	0	0	0	0	0	0	0	0	0	0	0	0	0	0	0	0	0.00316506	0.00509667	0	0	0	0	0	0	0	0.00707293	0	0	0
9930104L06Rik	0.215592	0.308402	0.184343	0.50212	0.257424	0.221181	0.289388	0.253782	0.230684	0.224168	0.293745	0.195406	0.338851	0.250782	0.220152	0.193713	0.271702	0.225752	0.18682	0.20553	0.204704	0.238316	0.203921	0.206464	0.260253	0.189852	0.263721	0.323619	0.246722	0.287388	0.282673	0.243257	0.281617	0.206132	0.226546	0.270067	0.280438	0.149536	0.192541	0.51986	0.217825	0.255113	0.278502	0.269665	0.241733	0.379385	0.18753	0.367941	0.229431
9930111J21Rik2	0.00916054	0	0.0165035	0	0.0383287	0.00641803	0.00315067	0.0206294	0.00456018	0.0074532	0.00343142	0	0	0.00714585	0	0.012232	0.0137711	0	0.0252973	0	0.00753421	0.00962704	0.00943057	0.00924196	0	0	0.00815467	0	0	0.017773	0.00462098	0.00729629	0	0.00894383	0.00939861	0.0173287	0.0126602	0.107896	0	0	0	0.00900191	0.0088865	0.0110023	0.0231049	0.0141459	0.0117483	0	0.0066014
a	0	0	0	0	0	0.00320901	0.00315067	0	0.00456018	0	0	0	0	0	0	0	0	0	0	0	0	0	0	0	0	0	0	0	0	0	0	0	0	0	0.00234965	0	0	0	0	0	0.00468343	0	0.0088865	0	0	0.0141459	0	0	0.0264056
A030001D20Rik	0.0274816	0.0374674	0.0165035	0.0231049	0.0205885	0.0160451	0.0252054	0.0288811	0.0182407	0.0074532	0.00686284	0.0203867	0	0	0.0210045	0.024464	0.00459038	0.0213276	0.0151784	0.00877401	0.037671	0.00962704	0.00943057	0.0184839	0.00877401	0.007617	0.0326187	0.0308065	0.0281006	0	0.0369678	0.0145926	0.0407734	0.0134158	0.024871	0.0173287	0.0158253	0.0203867	0	0	0.00468343	0.0180038	0.0266595	0	0.0231049	0.0395021	0.0234965	0.0231049	0
A030005L19Rik	0	0.00936685	0	0	0.0137257	0.00962704	0.00315067	0.0165035	0.00912036	0	0.0102943	0.0203867	0	0	0.0105022	0	0.00918076	0.0106638	0.00505947	0.00438701	0.00753421	0.0192541	0	0.00924196	0	0.007617	0	0	0	0.017773	0.00462098	0	0	0.00447192	0.0046993	0	0.00633011	0.00509667	0	0	0.0187337	0	0	0	0	0.00707293	0.00587413	0.0231049	0.0066014
A030014E15Rik	0	0	0	0	0	0	0	0	0	0	0	0	0	0	0	0	0	0.0106638	0	0	0	0	0.00471529	0	0	0.007617	0	0	0	0	0	0	0	0	0	0	0	0	0	0	0.00468343	0.0180038	0	0	0	0	0.00587413	0	0
A130010J15Rik	0.178431	0.164716	0.293018	0.0462098	0.243698	0.261629	0.263889	0.198433	0.205983	0.231755	0.217351	0.203867	0.238977	0.195366	0.203112	0.129475	0.195834	0.178671	0.18176	0.209171	0.213518	0.255211	0.218506	0.217971	0.168197	0.287006	0.192328	0.18674	0.203775	0.315558	0.192949	0.214072	0.227718	0.2117	0.252257	0.25994	0.222154	0.240418	0.115525	0.346574	0.188133	0.163564	0.294096	0.21735	0.188765	0.289458	0.255582	0.152145	0.21735
A130014A01Rik	0.0152676	0.0523135	0.0495105	0.152145	0.0274514	0.0320901	0.00630134	0.0371329	0.00912036	0.0298128	0.0274514	0.0203867	0.0157533	0.0142917	0.0503317	0.024464	0.0275423	0.0106638	0.0101189	0.0332753	0.0301368	0.0192541	0.0141459	0.0184839	0.026322	0.038085	0.0407734	0.0629218	0.00936685	0	0.03505	0.0334532	0	0.0223596	0.0281958	0.0115525	0.0189903	0.0356767	0.0770164	0	0.0281006	0.0180038	0.017773	0.0550117	0.0414151	0.0819396	0.0704895	0.0231049	0.033007
A130051J06Rik	0.0183211	0.0468343	0.033007	0.0231049	0.0274514	0.00641803	0.00945201	0.0165035	0.0182407	0.0223596	0.0102943	0.0203867	0.0157533	0.00714585	0.0105022	0.00407734	0.00918076	0	0.00505947	0.00877401	0.00753421	0.00962704	0.00471529	0.00924196	0.00877401	0.015234	0.0163093	0.00770164	0.0187337	0.017773	0.0138629	0.00729629	0	0.00447192	0.0164476	0.0173287	0.00316506	0.0203867	0.0385082	0	0.00936685	0.00900191	0.0088865	0.033007	0	0.046575	0.0504292	0	0.0132028
A130077B15Rik	0	0	0	0	0	0.00320901	0	0	0	0	0.00343142	0	0	0	0.00525112	0	0	0	0	0	0	0	0	0	0.00877401	0	0	0	0	0.017773	0	0	0	0.00447192	0	0	0.00316506	0	0	0	0.00468343	0	0	0	0	0	0	0	0
A230001M10Rik	0	0	0	0	0	0	0	0	0	0	0.00343142	0	0	0	0	0	0	0	0	0	0.00753421	0	0.00471529	0	0	0	0	0.00770164	0	0	0	0	0	0	0.00234965	0	0	0	0	0	0	0	0	0	0	0	0	0	0
A230004M16Rik	0	0	0	0	0	0	0	0	0	0	0.00343142	0	0	0.00714585	0	0	0	0	0	0	0	0	0	0	0	0	0	0	0	0	0	0	0	0	0	0	0	0	0	0	0.00468343	0	0	0	0	0	0	0	0
A230005M16Rik	0	0	0.0165035	0	0.00686284	0.0160451	0.00630134	0	0	0	0.0102943	0	0	0	0.00525112	0.00407734	0.00459038	0.0213276	0	0.00438701	0.00753421	0	0	0	0	0	0.0163093	0	0.00936685	0	0	0	0	0.00447192	0.00234965	0	0.00316506	0	0	0	0	0	0.0088865	0	0	0.00707293	0.00587413	0	0.010463
A230009B12Rik	0	0	0	0	0	0	0	0	0	0	0.00343142	0	0	0	0	0	0.00918076	0	0	0	0	0	0	0	0	0	0	0	0	0	0	0	0	0.00894383	0	0.00577623	0	0	0	0	0.00468343	0	0	0	0	0	0	0	0
A230020J21Rik	0.00305351	0.0187337	0	0	0	0.00962704	0.00315067	0	0	0.0074532	0.00343142	0	0	0	0.00525112	0.00407734	0	0	0	0.00438701	0	0	0	0	0	0	0	0.00770164	0	0	0.00462098	0	0	0.00894383	0.00704895	0	0.00633011	0.00509667	0	0	0	0	0	0	0	0	0	0	0.0132028
A230028O05Rik	0	0	0	0	0.00686284	0	0.00945201	0.00825175	0.00456018	0.0074532	0.00343142	0	0	0	0	0	0.00459038	0	0	0	0	0	0.00471529	0	0	0	0	0	0	0	0	0	0	0	0	0.00577623	0	0	0	0	0.00468343	0	0	0	0	0	0	0	0
A230056P14Rik	0.00305351	0	0	0	0	0.00641803	0.00315067	0.00412588	0	0	0.00686284	0	0	0.00714585	0	0.00815467	0	0	0	0	0.0150684	0	0.00471529	0.00924196	0	0	0	0	0	0.017773	0	0.00729629	0	0.00447192	0.00704895	0	0.00633011	0	0	0	0.00936685	0	0	0	0	0	0.0117483	0	0.0066014
A230057D06Rik	0	0	0	0	0.00686284	0.00962704	0.00315067	0.0123776	0.00912036	0.0074532	0.00343142	0	0	0	0	0.00407734	0.00918076	0.0106638	0.00505947	0.00438701	0	0.00962704	0	0	0	0.007617	0.00815467	0	0	0.0281695	0	0.00729629	0	0.00894383	0.00234965	0	0.00316506	0	0	0	0	0.00900191	0.0088865	0	0.0115525	0	0	0	0.0066014
A230060F14Rik	0.00305351	0	0	0	0	0	0	0.00412588	0.00912036	0	0.00686284	0	0	0.00714585	0	0	0	0	0	0.00877401	0.00753421	0	0.00471529	0.00924196	0.00877401	0	0.00815467	0.00770164	0.00936685	0.035546	0	0	0	0.00447192	0	0.00577623	0.00633011	0	0	0	0	0	0	0	0	0	0.00587413	0	0
A230072C01Rik	0.0427492	0.0616804	0.033007	0.0462098	0.0451916	0.0371763	0.0441094	0.033007	0.0273611	0.0819852	0.0446085	0.101933	0.04726	0.0285834	0.0420089	0.024464	0.048589	0.0426552	0.0455352	0.0307091	0.0301368	0.0385082	0.0612987	0.0369678	0.0526441	0.030468	0.0536982	0.0616131	0.065568	0.035546	0.0415888	0.0437777	0.0407734	0.0715507	0.0399441	0.0611411	0.0733341	0.03058	0	0	0.0421508	0.0450096	0.017773	0.0220047	0.0115525	0.0778022	0.0563033	0.0924196	0.0671358
A230072E10Rik	0.00305351	0	0.0165035	0	0.0137257	0.0128361	0.0157533	0.0147911	0.0228009	0.0074532	0.0171571	0.0203867	0	0.00714585	0.00525112	0.0163093	0.00918076	0.0106638	0.0333164	0.00877401	0.00753421	0.00962704	0.0141459	0	0.017548	0.007617	0	0	0	0	0.0184839	0.00729629	0	0	0.00234965	0.0173287	0.0253204	0.01529	0	0	0.00468343	0.0180038	0	0.0220047	0	0.0141459	0.0117483	0	0.0132028
A230077H06Rik	0	0	0	0	0	0.00320901	0	0	0	0	0	0	0	0	0	0	0	0	0	0	0	0	0	0	0	0	0	0	0	0	0	0	0	0	0	0	0	0	0	0	0	0	0	0	0	0	0	0	0
A230083G16Rik	0	0	0	0	0.00686284	0	0	0	0	0	0	0	0	0.00714585	0	0	0	0.0106638	0	0	0	0	0	0	0	0	0	0	0	0	0	0	0	0	0	0	0	0.0101933	0	0	0	0	0	0	0	0.00707293	0	0	0
A230083N12Rik	0.00610702	0	0.0165035	0	0.0137257	0.0147132	0.00945201	0	0.00912036	0.0149064	0.00686284	0	0.0157533	0.0142917	0	0	0.00918076	0.0213276	0	0.00877401	0	0.00962704	0	0.0184839	0.00877401	0	0.00815467	0.00770164	0	0	0.00462098	0.00729629	0	0.00894383	0.0046993	0.00577623	0.00316506	0.01529	0.0385082	0	0.0214733	0.00900191	0.0088865	0.0220047	0	0.00707293	0.00587413	0	0.0132028
A230087F16Rik	0.0183211	0.0187337	0	0.0231049	0.0520544	0.0288811	0.0252054	0.0371329	0	0.0149064	0.0225958	0.0526988	0.0157533	0.0142917	0.0210045	0.0309264	0.00459038	0.0213276	0.0101189	0.013161	0	0	0.0188611	0.0277259	0.0350961	0.022851	0.0163093	0.0231049	0.0281006	0.0918851	0.0231049	0	0.0407734	0.0294474	0.00704895	0.0173287	0.0126602	0.03058	0	0	0.0187337	0.0450096	0.0266595	0.033007	0.0414151	0.0212188	0.0234965	0.0231049	0.033007
A230098N10Rik	0	0	0	0	0	0	0	0	0	0	0	0	0	0	0	0	0	0	0	0	0	0	0	0	0	0.007617	0.0292342	0	0	0	0	0	0	0.00447192	0.00234965	0	0	0	0	0	0	0	0	0.0174383	0	0	0	0	0
A230103J11Rik	0	0	0	0.0231049	0	0.00320901	0.00315067	0.00825175	0.00456018	0	0.00343142	0	0	0	0.00525112	0	0	0	0.00801907	0	0.00753421	0	0.00943057	0	0.00877401	0	0	0	0.00936685	0	0.00924196	0	0	0	0.00704895	0	0.00316506	0	0	0	0.00468343	0	0	0	0	0.00707293	0.0176224	0	0.0066014
A230103O09Rik	0.00305351	0	0.0165035	0	0	0	0	0	0.00456018	0.0447192	0.0554858	0.06116	0	0	0.00525112	0.00407734	0.00459038	0.0106638	0.00505947	0	0.00753421	0.00962704	0	0	0	0.007617	0	0	0.00936685	0	0.00732408	0.00729629	0	0	0	0	0	0	0	0	0	0	0	0.0110023	0	0	0	0.0231049	0.0066014
A230107N01Rik	0	0	0.033007	0	0	0.00641803	0	0.00412588	0	0	0.00343142	0	0	0	0	0	0	0.0106638	0.00505947	0	0.00753421	0	0	0	0	0	0	0.00770164	0	0	0.00924196	0	0	0	0	0	0	0.00509667	0	0	0	0	0	0	0	0	0.0176224	0	0
A2m	0.122091	0.0374674	0.115525	0.610355	0.0726429	0.0724755	0.0849965	0.173678	0.189292	1.06392	0.738269	1.53298	0.0787667	0.1382	0.111166	0.0350038	0.158413	0.27989	0.0556542	0.0394831	0.136896	0.0192541	0.033007	0.0462098	0.119195	0.060936	0.0407734	0.0154033	0.0374674	0.035546	0.113176	0.15873	0.0815467	0.185212	0.113582	0.11073	0.070169	0.01529	0.0385082	0.173287	0.144038	0.0825469	0.10295	0.0770164	0.0577623	0.637596	1.04343	0.138629	0.31402
A2ml1	0	0	0	0	0	0.00320901	0	0	0	0	0	0	0	0	0	0	0	0	0.00505947	0	0	0	0	0	0	0	0	0	0	0	0	0	0	0	0	0	0	0	0	0	0	0	0	0	0	0	0	0	0
A330008L17Rik	0	0	0.0165035	0.0462098	0	0	0	0	0	0	0	0	0	0	0	0.00815467	0.00459038	0	0.00505947	0.00438701	0.00753421	0	0.0141459	0	0	0	0	0	0	0	0	0	0.0407734	0.00447192	0	0	0.00316506	0	0	0	0	0	0	0	0	0	0	0	0
A330009N23Rik	0.0244281	0.0187337	0.0165035	0	0.0480399	0.0160451	0.018904	0.0288811	0.0273611	0.0149064	0.0308828	0.0407734	0.0315067	0.0214375	0.0157533	0.0326187	0.0137711	0.0106638	0.0202379	0.0307091	0.0301368	0.0192541	0.0141459	0.0369678	0	0.015234	0.0326187	0.0661183	0	0.035546	0.0277259	0.0145926	0.0815467	0.0268315	0.0342696	0.0380362	0.0189903	0.0203867	0	0	0.0140503	0	0.0266595	0.0110023	0.0231049	0.0353647	0.0117483	0	0
A330015K06Rik	0.00305351	0	0.0165035	0	0	0	0.00630134	0.00412588	0.00456018	0	0.0102943	0	0.0157533	0	0	0	0.00459038	0	0	0	0	0	0.00471529	0	0	0	0	0	0	0	0	0	0	0	0.00234965	0	0	0.00509667	0	0	0	0	0	0	0	0.00707293	0	0	0.0132028
A330023F24Rik	0.00305351	0.024213	0.0261574	0	0	0.00320901	0.00630134	0.0165035	0	0.0223596	0.0171571	0	0.0157533	0.0142917	0.0157533	0.0203867	0.00459038	0.0106638	0.0202379	0.00438701	0	0.00962704	0	0.00924196	0.00877401	0.015234	0.0326187	0	0	0	0.00924196	0	0	0.0134158	0.0117483	0.00577623	0.00949517	0.00509667	0	0	0.00468343	0.0180038	0	0.0220047	0.0231049	0.00707293	0.00587413	0	0
A330032B11Rik	0	0	0	0	0	0.00320901	0	0	0	0.0149064	0.0137257	0	0	0.00714585	0	0.00407734	0.00459038	0.0106638	0	0	0	0.00962704	0	0	0	0	0.00815467	0	0	0	0.00462098	0	0	0	0.0046993	0	0	0	0	0	0.00468343	0	0	0	0	0.218729	0.0621774	0	0.0132028
A330035P11Rik	0.00610702	0.0374674	0.0495105	0	0.0205885	0.0128361	0.00945201	0.0288811	0.0410416	0.0149064	0.0102943	0.06116	0.0315067	0.00714585	0.0135739	0.0163093	0.0137711	0.0106638	0.0151784	0.017548	0.0301368	0	0.0216194	0.0184839	0.017548	0.0273067	0.0163093	0.0154033	0	0	0.0138629	0	0	0.0178877	0.0332944	0.0115525	0.0126602	0.01529	0	0	0.0140503	0	0.035546	0	0.0346574	0.0353647	0.0117483	0.0231049	0.0198042
A330040F15Rik	0.00305351	0.00936685	0.0165035	0.0231049	0.00686284	0.00641803	0.018904	0	0	0.0149064	0.0171571	0	0	0	0.0210045	0.00815467	0.00459038	0.0106638	0	0.0113402	0.00753421	0	0.00471529	0	0	0	0.00815467	0.0539114	0	0	0.00462098	0	0	0.00447192	0.0046993	0	0.00633011	0.00509667	0	0	0	0.00900191	0	0	0	0	0.0176224	0	0.0066014
A330041J22Rik	0.00916054	0	0	0	0.00686284	0.0230084	0.00315067	0.00825175	0.0254684	0.0223596	0.0205885	0.0203867	0.0157533	0.0142917	0.0210045	0.00407734	0.00459038	0.0213276	0	0.013161	0	0.0385082	0	0.00924196	0	0.007617	0.0163093	0.0154033	0.0187337	0.017773	0.00462098	0.0145926	0	0.00894383	0.00704895	0.00577623	0.00633011	0.0131747	0	0	0.00936685	0.0180038	0.0088865	0.0220047	0.0346574	0.101796	0.0328068	0.0231049	0.0066014
A330048O09Rik	0.00610702	0	0	0	0.00686284	0.00320901	0.0126027	0.00825175	0.00456018	0.0074532	0.00686284	0	0	0.00714585	0.0157533	0.00407734	0.0137711	0.0213276	0.0202379	0.013161	0.00753421	0	0.0188611	0	0.00877401	0	0	0.00770164	0.0187337	0.017773	0.00924196	0.0437777	0	0.00894383	0.00704895	0	0.0113466	0.00509667	0	0	0.00468343	0.0180038	0.0088865	0.0220047	0.0115525	0	0.00587413	0	0.0066014
A330074K22Rik	0	0	0	0	0	0	0	0	0	0.0074532	0.00343142	0	0	0	0	0.00407734	0.00459038	0.0213276	0	0	0	0	0	0	0	0	0	0.00770164	0.0148461	0.035546	0	0.00729629	0	0.00447192	0	0.00577623	0.00316506	0.01529	0	0	0	0	0	0	0	0	0.0117483	0	0
A330076C08Rik	0	0	0	0	0	0	0	0.00412588	0	0	0	0	0	0	0	0	0	0	0	0	0	0	0	0	0	0	0	0	0	0	0	0	0	0	0.00234965	0	0	0.00509667	0	0	0	0	0	0	0.0115525	0	0.00587413	0	0
A330076H08Rik	0	0	0	0	0	0	0	0.00653936	0.00456018	0	0.00343142	0	0	0.0142917	0.0105022	0	0.00459038	0	0	0	0	0	0.00471529	0.00924196	0.00877401	0	0	0	0	0	0.00462098	0	0	0.00894383	0.00234965	0	0	0.00509667	0	0	0	0	0	0.0110023	0	0	0.0117483	0	0
A330084C13Rik	0	0.0148461	0.0165035	0.0231049	0.0343142	0.0115042	0.0238977	0.00412588	0.0136805	0.0550964	0.0363215	0	0	0.0142917	0.0105022	0.00815467	0.02902	0.0213276	0.0151784	0.0157273	0.0150684	0	0	0	0	0.053319	0	0.00770164	0	0	0.030429	0.00729629	0.0407734	0.00894383	0.0117483	0.00577623	0.0226932	0	0.154033	0	0.0187337	0.00900191	0	0	0	0.0141459	0.0303688	0.0231049	0.0264056
A330093E20Rik	0.00305351	0	0	0	0	0	0	0	0	0	0.00686284	0	0	0	0	0.00407734	0	0	0	0	0	0	0	0	0	0.007617	0	0.00770164	0	0.017773	0	0	0	0.00447192	0	0	0	0	0	0	0	0	0	0	0	0	0	0	0
A330094K24Rik	0.0201073	0.0374674	0.0495105	0.0231049	0.0274514	0.0275493	0.0126027	0.0288811	0.00456018	0.0447192	0.0397529	0	0	0.0428751	0	0.0203867	0.0275423	0.0488931	0.0101189	0.0350961	0.0194756	0.0481352	0.0499111	0.00924196	0.0139065	0.007617	0.0163093	0	0.0468343	0	0.0138629	0.0218889	0	0.0178877	0.0413185	0.0173287	0.0126602	0.01529	0.154033	0	0.0421508	0.0360076	0.0444325	0.0110023	0.0346574	0.0353647	0.0117483	0.0231049	0.0671358
A330102I10Rik	0	0	0	0	0	0	0	0	0	0.0074532	0	0	0	0	0	0.00815467	0	0	0.00505947	0	0	0	0	0	0	0	0	0	0	0	0	0	0	0	0	0	0	0	0	0	0	0	0	0	0	0	0.00587413	0	0
A3galt2	0.00610702	0	0	0	0	0	0	0	0	0.0074532	0.00343142	0	0	0	0	0.00407734	0	0.0106638	0.00505947	0.00438701	0	0	0.00471529	0	0	0	0	0	0	0	0	0	0	0	0	0	0	0	0	0	0	0	0	0	0	0.0141459	0.00587413	0	0.0066014
A430005L14Rik	1.28231	1.15225	1.10752	1.39019	1.06453	1.31585	1.33388	1.2027	1.17628	1.3856	1.23324	1.41955	1.29157	1.28702	1.17453	1.35135	1.23129	1.02049	1.39165	1.33604	1.16117	1.19137	1.26214	1.03688	1.25674	1.56929	1.46237	0.717914	1.24625	1.20637	1.25082	1.20754	1.21089	1.21878	1.25383	1.24362	1.26529	1.08312	1.03324	1.61537	1.17651	1.21628	1.24936	1.1363	1.2291	1.24508	1.15656	1.28721	1.27986
A430010J10Rik	0.0188399	0.00936685	0	0	0.0108773	0.00641803	0.0211109	0.0206294	0.0228009	0.0074532	0.0171571	0	0	0.0142917	0.0135739	0.0163093	0.00459038	0.0213276	0.0202379	0.00438701	0.0194756	0	0.0235764	0.0184839	0	0	0	0	0.00936685	0	0	0.0218889	0	0.0268315	0.0140979	0.00577623	0.0189903	0.0101933	0	0	0.0167899	0.0209018	0.0229713	0	0	0.0253562	0.0117483	0.0462098	0.0066014
A430018G15Rik	0.0140002	0.00936685	0.033007	0.0231049	0.0274514	0.0160451	0.018904	0.00825175	0.00912036	0.0074532	0.0102943	0.0203867	0	0.0256176	0.0188251	0.024464	0.0183615	0.0213276	0.0202379	0.013161	0.0301368	0.0192541	0.0235764	0.0369678	0.026322	0.007617	0.00815467	0.00770164	0	0.035546	0.0138629	0.0218889	0.0407734	0.0134158	0.0140979	0.0173287	0.0158253	0.0101933	0.0385082	0	0.0234171	0.0360076	0.0266595	0.0220047	0.0115525	0.0424376	0.0293706	0	0.0198042
A430027H14Rik	0	0	0	0	0	0	0	0	0	0	0	0	0	0.00714585	0	0	0	0	0	0	0	0	0	0	0	0	0	0.140392	0	0	0	0	0	0	0.00234965	0	0	0	0	0	0	0	0	0	0	0	0	0	0
A430033K04Rik	0.0878034	0.103035	0.16099	0.0828302	0.130394	0.0871887	0.0811451	0.084931	0.0912036	0.120518	0.14671	0.207331	0.16021	0.101256	0.0870895	0.0733921	0.115539	0.102212	0.0687327	0.0526441	0.0872835	0.101902	0.0911929	0.0462098	0.0965142	0.111094	0.0897014	0.135433	0.0804141	0.0992616	0.102447	0.109444	0.163093	0.0741666	0.0708888	0.0750909	0.0928623	0.106647	0.115525	0	0.0562011	0.0772811	0.10295	0.0880187	0.0808672	0.149733	0.221777	0.115525	0.0858182
A430035B10Rik	0	0	0	0	0.00686284	0	0	0	0.00456018	0.0149064	0.0102943	0	0	0	0	0	0	0	0	0	0	0.00962704	0	0	0.00877401	0	0.00815467	0.0154033	0	0	0	0	0	0.00447192	0.00704895	0.00577623	0.00316506	0	0	0	0	0	0.0266595	0	0	0.0141459	0.00587413	0	0
A430048G15Rik	0	0	0	0	0	0	0	0	0	0	0	0	0	0	0	0	0	0	0	0	0	0	0	0	0	0	0	0.00770164	0	0	0	0	0	0	0	0	0	0.00509667	0	0	0	0	0	0	0	0	0.00587413	0	0
A430057M04Rik	0.0183211	0.00936685	0.033007	0	0.0205885	0.0224631	0.018904	0.00412588	0.00912036	0.0149064	0.0102943	0.0203867	0.0157533	0	0.0293273	0.0285414	0.0137711	0.0319914	0.0151784	0.00877401	0.0226026	0.0288811	0.0188611	0.00924196	0.017548	0.007617	0.0326187	0.00770164	0.0187337	0.017773	0.00462098	0.0145926	0	0.00894383	0.0238958	0.0115525	0.0253204	0	0	0	0.00468343	0.0360076	0.0088865	0.0220047	0.0115525	0.0141459	0.00587413	0	0
A430073D23Rik	0.0305351	0.0562011	0.033007	0	0.0205885	0.0352992	0.0315067	0.0371329	0.0319213	0.037266	0.0411771	0.0203867	0.0157533	0.0470551	0.0293273	0.036696	0.0183615	0.053319	0.0354163	0.0307091	0.0452053	0.0192541	0.0235764	0.0462098	0.0350961	0.022851	0.024464	0	0.065568	0.035546	0.00924196	0.0437777	0	0.0223596	0.0258462	0.0173287	0.0340398	0.00509667	0	0.173287	0.0140503	0.099021	0.035546	0.0220047	0.0115525	0.0282917	0.046993	0	0.0170644
A430078I02Rik	0	0.00936685	0	0	0	0.00641803	0.0252054	0.00412588	0.00912036	0.0149064	0.00686284	0	0.04726	0	0.00525112	0.00407734	0.00459038	0.0213276	0.00505947	0	0	0	0.00471529	0.0184839	0.00877401	0	0	0	0.00936685	0	0.0138629	0.0218889	0	0.00447192	0.00939861	0.00577623	0.00316506	0.00509667	0	0	0	0.0180038	0	0.0220047	0.0115525	0	0	0	0.0066014
A430088P11Rik	0	0	0	0	0	0	0	0	0	0	0	0	0	0	0	0	0	0	0	0	0	0	0	0	0	0	0	0	0	0	0	0	0	0	0	0	0	0	0	0	0	0	0	0	0	0	0	0	0
A430090L17Rik	0.00305351	0.0374674	0.0165035	0.0231049	0.0137257	0.00641803	0.0315067	0.0165035	0.0163481	0.0074532	0.02402	0.0203867	0	0.0142917	0.0315067	0.012232	0.00918076	0.0106638	0.0101189	0.00438701	0.0226026	0	0.00471529	0.0184839	0.0350961	0.015234	0	0.0154033	0.00936685	0	0.0184839	0	0.0407734	0.0178877	0.00939861	0	0.0189903	0	0	0	0.00468343	0.0360076	0.0088865	0.0220047	0	0.00707293	0	0.0597253	0.0132028
A430093F15Rik	0	0	0	0	0	0	0	0	0	0	0	0.0203867	0	0	0	0	0	0	0	0	0	0	0	0	0	0	0	0.0462098	0	0	0	0	0	0	0	0	0	0	0	0	0	0	0	0	0	0	0	0	0
A430105J06Rik	0.0292678	0.0710472	0.0495105	0.0462098	0.0480399	0.0666027	0.0535614	0.0766793	0.050162	0.0894383	0.0397529	0.06116	0.0630134	0.054201	0.0450806	0.048928	0.0321327	0.0959742	0.0535543	0.0639843	0.0797493	0.00962704	0.0848752	0.0739357	0.0577766	0.038085	0.0570827	0.104626	0.0281006	0.017773	0.0323469	0.0364814	0.0407734	0.051807	0.0577661	0.0553649	0.0379807	0.0590447	0.115525	0	0.0468343	0.0412734	0.0444325	0.0550117	0.0876249	0.0536479	0.120919	0.0693147	0.0792168
A430108G06Rik	0.00916054	0.00936685	0	0	0.0137257	0.00320901	0.00315067	0.00825175	0.00912036	0.0223596	0.00343142	0	0.0315067	0.0142917	0.00525112	0.00407734	0.00918076	0	0.00505947	0.017548	0	0	0	0	0	0.0273067	0.00815467	0.00770164	0.0187337	0.017773	0	0.00729629	0	0.0134158	0.0046993	0	0.00633011	0.00509667	0	0	0.00468343	0.00900191	0	0	0	0.0141459	0.0176224	0	0.0198042
A430110L20Rik	0	0.00936685	0.0165035	0	0	0.0128361	0.00315067	0	0	0	0.0171571	0.0203867	0.0157533	0.00714585	0.0157533	0.00815467	0.00459038	0	0	0	0.00753421	0	0.00471529	0	0	0.007617	0.00815467	0.00770164	0.00936685	0	0	0	0	0	0.0046993	0	0.00316506	0	0	0	0	0	0.0088865	0	0	0.0141459	0.0293706	0	0.0198042
A4galt	0.024947	0.0374674	0.099021	0.0366204	0.0686284	0.0500124	0.0491031	0.0790927	0.0926716	0.0298128	0.0363215	0.0407734	0.0157533	0.0571668	0.147924	0.0203867	0.0642653	0.053319	0.0404757	0.0376623	0.0452053	0.105897	0.107296	0.0277259	0.0614181	0.099021	0.0163093	0.10143	0.0897809	0.124411	0.0535339	0.0772309	0.0407734	0.0760226	0.0436682	0.0438125	0.0714827	0.04587	0.061034	0	0.0710472	0.0720153	0.035546	0.0770164	0.0760725	0.00707293	0.0352448	0.0231049	0.0632742
A4gnt	0	0	0	0	0	0	0	0	0	0	0	0	0	0	0	0	0	0	0	0	0	0	0	0	0	0	0	0	0	0	0	0	0	0	0	0	0	0	0	0	0	0	0	0	0	0.00707293	0.0352448	0	0
A530013C23Rik	0	0	0	0	0	0	0	0	0	0	0	0	0	0	0.00525112	0	0	0	0	0.00438701	0	0	0.00471529	0	0	0	0	0.0154033	0	0.017773	0	0	0	0	0.00234965	0	0	0	0	0	0	0	0	0	0	0	0	0	0
A530016L24Rik	0.00305351	0	0	0	0	0	0	0	0	0	0	0	0	0	0	0	0	0	0.00505947	0	0.00753421	0	0	0	0	0	0	0	0	0	0	0	0	0	0	0	0	0	0	0	0	0	0	0	0	0	0	0	0
A530017D24Rik	0.0450542	0.0468343	0.0165035	0.0231049	0.0137257	0.0532214	0.0383434	0.0412588	0.0364814	0.0298128	0.0411771	0.0203867	0.0249685	0.0571668	0.0315067	0.0448507	0.0688557	0.0639828	0.0434353	0.0332753	0.0496125	0.0577623	0.0282917	0.0554518	0.0438701	0	0.0570827	0.0199084	0.0281006	0.0459426	0.0766388	0.0437777	0.0815467	0.0812544	0.0403433	0.0611411	0.0348156	0.0386581	0	0	0.0234171	0.0540115	0.0851768	0.033007	0.0231049	0.0424376	0.0352448	0.0693147	0.0594126
A530020G20Rik	0.00789321	0	0	0	0.0137257	0.0128361	0.00630134	0	0	0	0	0	0.0157533	0	0	0	0.00918076	0	0	0	0.00753421	0	0	0	0	0	0.048928	0	0	0	0	0	0	0	0.00234965	0	0	0	0	0	0	0	0	0	0	0.00707293	0	0	0.0066014
A530032D15Rik	0	0	0	0	0	0	0	0	0	0	0	0	0	0	0	0	0	0	0	0	0	0	0	0	0	0	0	0	0	0	0.00462098	0	0	0	0	0.00577623	0.00316506	0	0	0	0	0.00900191	0	0	0	0	0.00587413	0	0.0066014
A530041M06Rik	0.0231608	0.065568	0.0495105	0	0.0137257	0.0417172	0.028356	0.0395464	0.0326961	0.0223596	0.0308828	0	0.0157533	0.0571668	0.0157533	0.012232	0.0183615	0.0426552	0.0303568	0.021935	0.0452053	0.0537667	0.00943057	0.00924196	0.0438701	0.045702	0.048928	0.0231049	0.0187337	0.053319	0.0462098	0.0729629	0.0407734	0.0223596	0.0140979	0.0231049	0.0448486	0.0254834	0.0385082	0	0.032784	0.0450096	0.0266595	0.0440093	0.0414151	0.0424376	0.0411189	0	0.033007
A530046M15Rik	0	0	0	0	0	0	0	0.00412588	0.00456018	0	0	0	0	0	0	0	0	0	0	0	0	0.00962704	0.00471529	0	0	0	0	0	0	0	0	0	0	0	0	0	0	0	0	0	0	0	0	0	0	0	0	0	0
A530058N18Rik	0	0	0	0	0	0	0	0	0	0	0.00343142	0.0203867	0	0	0	0	0	0	0	0.00438701	0	0	0	0	0	0	0	0.00770164	0	0	0	0	0	0	0	0	0	0	0	0	0	0	0	0	0	0	0	0	0
A530072M11Rik	0	0	0	0	0	0.00962704	0	0	0.00456018	0	0.00343142	0.0203867	0.0157533	0	0	0.00815467	0	0	0	0.00438701	0	0	0.00471529	0	0	0	0	0.00770164	0	0.017773	0	0	0	0.00447192	0.00704895	0	0	0.00509667	0	0	0.0140503	0.0142677	0	0	0	0	0	0	0.0132028
A530076I17Rik	0	0	0	0	0	0	0	0	0	0	0.00343142	0	0	0	0	0	0	0	0	0	0	0.00962704	0	0	0	0	0	0	0.00936685	0.017773	0	0	0	0	0	0	0	0.00509667	0	0	0	0	0	0	0	0	0.00587413	0	0.0066014
A530083I20Rik	0.0152676	0.00936685	0.033007	0	0.0480399	0.0211312	0.0270484	0.0165035	0.0163481	0.0192662	0.0343142	0	0.0157533	0	0.0105022	0.012232	0.00918076	0.0213276	0	0.017548	0.0150684	0	0.0141459	0.0277259	0.026322	0.007617	0.0326187	0.0154033	0.0187337	0.017773	0.0138629	0.0291851	0.0407734	0.00447192	0.024871	0.0115525	0.0221554	0.01529	0.0385082	0	0.0234171	0.0180038	0.035546	0.033007	0.0115525	0	0.0411189	0	0.0264056
A530084C06Rik	0.00305351	0	0	0	0	0	0	0	0	0	0.00343142	0	0	0	0	0	0	0	0	0.00877401	0	0	0	0	0	0.045702	0.024464	0.0154033	0	0	0	0	0	0	0	0	0	0.00509667	0	0	0	0	0	0	0	0	0	0	0
A530088E08Rik	0	0	0	0	0	0	0	0	0	0	0	0.0203867	0	0	0	0	0	0	0	0	0	0	0	0	0	0	0	0.0154033	0	0	0	0	0	0	0	0	0	0	0	0	0	0	0	0	0	0.0141459	0.00587413	0	0
A630001G21Rik	0.00916054	0.0281006	0.0165035	0.0231049	0.0137257	0.00962704	0	0.0123776	0	0.0074532	0.0171571	0.0407734	0.0157533	0	0.0210045	0.036696	0	0	0.0333164	0.00438701	0	0.00962704	0.00943057	0	0.00877401	0	0	0	0.0374674	0.017773	0.0138629	0.00729629	0	0.00894383	0.00234965	0.00577623	0.00633011	0.00807803	0.0385082	0	0	0.0180038	0.0088865	0	0.0115525	0.0141459	0.00587413	0	0.04347
A630001O12Rik	0	0	0	0	0	0	0	0	0	0	0	0	0	0.00714585	0.00525112	0	0	0	0	0	0	0	0	0	0	0	0	0	0	0	0	0	0	0	0	0	0	0	0	0	0	0	0	0	0	0	0	0	0
A630010A05Rik	0	0	0	0	0	0	0	0.00412588	0.00456018	0	0	0	0	0.00714585	0	0	0	0	0	0	0	0	0	0	0.00877401	0	0	0	0	0	0	0	0	0	0	0	0	0	0	0	0.00742306	0	0	0	0	0	0	0	0
A630012P03Rik	0	0	0	0	0	0	0	0	0	0	0.00343142	0	0.0157533	0	0	0	0	0	0	0.00438701	0	0	0	0	0	0	0	0	0	0	0.00462098	0	0	0	0.00234965	0	0	0	0	0	0	0.00900191	0	0	0	0	0	0	0
A630014C17Rik	0	0	0	0	0	0	0	0	0.00456018	0	0.00343142	0	0	0	0	0	0	0.0106638	0.00505947	0.00438701	0	0	0.00747355	0	0	0	0	0.00770164	0	0	0	0	0	0	0	0	0	0.0101933	0	0	0	0	0.0088865	0	0	0	0	0	0
A630023P12Rik	0	0	0	0	0	0	0	0	0	0	0	0	0	0	0	0	0	0	0	0	0.00753421	0	0	0	0	0	0	0	0	0	0	0	0	0.00447192	0	0	0	0	0	0	0	0	0.0088865	0	0	0	0	0	0
A630035G10Rik	0	0	0	0	0	0	0.00315067	0	0	0	0	0	0	0	0	0	0	0	0	0	0	0	0	0.00924196	0	0	0	0	0	0	0	0	0	0	0	0	0	0.00509667	0.0385082	0	0	0	0	0	0	0	0	0	0
A630052C17Rik	0.0358937	0.0187337	0	0.0462098	0.0343142	0.0288811	0.0126027	0.0495105	0.039149	0.0267194	0.0205885	0	0.0315067	0.0142917	0.0157533	0.00815467	0.0229519	0.0426552	0.0303568	0.0332753	0.037671	0.0288811	0.0282917	0.0554518	0.0350961	0.030468	0.00815467	0.0231049	0.0281006	0.017773	0.0323469	0.0407495	0	0.0357753	0.042693	0.00577623	0.0353534	0.0407734	0	0	0.0421508	0.0360076	0.0674038	0	0.0693147	0.0424376	0.0293706	0.0462098	0.0264056
A630072L19Rik	0	0	0	0	0	0	0	0	0	0	0	0	0	0	0	0	0.00918076	0	0.00505947	0	0	0	0	0	0	0	0	0	0	0	0	0.00729629	0	0	0.00234965	0	0.00316506	0	0	0	0	0.0180038	0	0	0	0	0	0	0
A630072M18Rik	0.0982312	0.235763	0.132028	0.202281	0.223637	0.197087	0.15046	0.170563	0.129235	0.119251	0.179925	0.12232	0.225901	0.187006	0.175071	0.200869	0.146547	0.119114	0.174982	0.192698	0.188355	0.150037	0.176068	0.201058	0.133101	0.199336	0.214793	0.27785	0.132728	0.18075	0.114392	0.15873	0	0.132302	0.167048	0.133835	0.124994	0.129149	0.0385082	0.173287	0.210402	0.19057	0.134808	0.212784	0.214702	0.136789	0.183414	0.115525	0.212367
A630089N07Rik	0.275684	0.371506	0.433459	0.188765	0.24603	0.354397	0.363166	0.381139	0.374724	0.295741	0.359206	0.453537	0.34925	0.404487	0.421891	0.424509	0.383349	0.327162	0.319409	0.371498	0.395632	0.291187	0.319052	0.32818	0.283551	0.370084	0.357433	0.179755	0.347461	0.305161	0.332371	0.35753	0.333115	0.364096	0.377591	0.381684	0.383633	0.175885	0.13805	0.346574	0.34111	0.41953	0.322266	0.40227	0.374492	0.336033	0.186532	0.533602	0.356605
A630095N17Rik	0	0.0187337	0	0	0	0	0	0	0	0	0	0	0	0	0.00525112	0	0	0	0	0	0	0	0.00943057	0	0	0	0	0.00770164	0	0	0.00924196	0	0	0.00447192	0	0	0	0	0	0	0.00468343	0	0.0088865	0	0	0	0	0	0.0066014
A730011C13Rik	0.00610702	0.00936685	0	0	0.00686284	0.00641803	0.00315067	0.00412588	0.00456018	0.0074532	0.00686284	0.0203867	0	0	0.0105022	0.012232	0	0	0	0.00877401	0	0	0.00471529	0.00924196	0	0	0.0163093	0.00770164	0	0	0.00924196	0.00729629	0	0	0.00939861	0.00577623	0	0.0101933	0.0770164	0	0.00468343	0.00900191	0.017773	0	0	0	0.0293706	0	0
A730017L22Rik	0.0262143	0.0616804	0.0825175	0.0231049	0.0617656	0.0320901	0.0396511	0.0453846	0.0319213	0.0149064	0.0603414	0.0407734	0.0315067	0.0643126	0.00525112	0.0390811	0.0302275	0.0595569	0.0434353	0.0420493	0.0452053	0.0345126	0.0499111	0.0646937	0.106779	0.0501577	0.0407734	0.0539114	0.0468343	0.035546	0.0535339	0.0218889	0	0.0428632	0.0272206	0.0346574	0.0379807	0.0764501	0	0	0.0476301	0.0720153	0.0622055	0.0110023	0.0231049	0.09315	0.046993	0.0462098	0.0396084
A730020E08Rik	0	0.00936685	0	0	0	0	0	0	0.00456018	0.0149064	0	0	0	0.0113259	0	0.00815467	0	0	0.00505947	0	0	0	0	0.0146482	0	0.015234	0.00815467	0	0	0	0	0	0	0.00447192	0	0	0	0.0182714	0	0	0	0	0	0	0	0.00707293	0.0234965	0	0
A730020M07Rik	0.00305351	0	0	0	0	0	0	0	0	0	0.00343142	0	0	0	0	0.00407734	0	0.0106638	0	0	0	0	0	0	0	0.022851	0.00815467	0	0	0.017773	0	0	0	0	0	0	0.00316506	0	0	0	0	0	0	0	0	0.00707293	0.00587413	0	0
A730035I17Rik	0	0	0	0	0	0	0	0	0	0	0	0	0	0	0	0	0	0	0	0.00438701	0	0	0	0	0	0	0	0	0	0	0	0	0	0	0.00234965	0	0	0.0101933	0	0	0	0	0	0	0	0.00707293	0	0	0
A730036I17Rik	0	0.0187337	0.0756679	0	0.0205885	0.00641803	0.0157533	0.0337081	0.00912036	0	0.00343142	0.0203867	0	0	0.0279461	0	0.0191415	0	0.00505947	0.00438701	0.00753421	0	0.00943057	0.00924196	0.017548	0	0	0.0154033	0.024213	0	0.0184839	0	0	0.0134158	0.00234965	0	0.00633011	0	0.0385082	0	0.00936685	0	0	0.0220047	0.0115525	0.00707293	0.0117483	0	0.0264056
A730046J19Rik	0	0	0	0	0	0	0	0	0	0.0074532	0	0	0	0	0	0	0	0	0	0	0	0	0	0	0	0	0	0	0	0	0.00924196	0	0	0.00447192	0	0	0	0.0131747	0	0	0.00468343	0	0	0	0	0	0	0	0
A730049H05Rik	0.0140002	0.00936685	0.0165035	0	0.00686284	0.00320901	0.0157533	0.0477981	0.0345888	0.0819852	0.0637728	0.0730855	0	0.00714585	0.0315067	0.00815467	0.00459038	0.0275655	0.00505947	0.013161	0.037671	0.0288811	0.0141459	0.00924196	0.017548	0.007617	0	0	0	0.017773	0.021187	0.0218889	0	0.0268315	0.0191965	0.0288811	0.0145117	0.0875094	0	0	0.0234171	0	0.0229713	0.0614476	0.0231049	0.0141459	0.0176224	0	0
A730056A06Rik	0	0	0	0	0	0	0	0	0	0	0	0	0	0	0	0	0	0	0	0	0	0	0.00471529	0	0	0.007617	0	0	0	0	0	0	0	0	0	0	0	0.00509667	0	0	0	0	0	0	0	0	0.00587413	0	0
A730061H03Rik	0.0109467	0	0.0165035	0.0231049	0.0205885	0.0179222	0.00315067	0.00412588	0.0163481	0.0223596	0	0	0.04726	0.00714585	0.0157533	0.0203867	0.0321327	0.0106638	0.0101189	0	0.0226026	0.00962704	0.00943057	0	0.00877401	0.0273067	0.00815467	0.0154033	0	0	0.0184839	0.0145926	0.0407734	0.00894383	0.0046993	0.0173287	0.00316506	0.00509667	0	0	0.00936685	0.00900191	0.017773	0.0220047	0.0115525	0.00707293	0.0176224	0.0231049	0.0066014
A730063M14Rik	0.037161	0	0.0165035	0	0.0520544	0.0513442	0.0477954	0.0495105	0.0619499	0.0223596	0.0397529	0.0203867	0.0879818	0.0357292	0.0525112	0.0448507	0.0348179	0.0319914	0.086011	0.0394831	0.0527395	0.0577623	0.0499111	0.0646937	0.0526441	0.0926983	0.0944716	0	0.0562011	0.0459426	0.0442919	0.0845272	0.0815467	0.0268315	0.0507171	0.0346574	0.0474758	0.0254834	0	0	0.0468343	0.0360076	0.0622055	0.105457	0.0462098	0.0282917	0.0797998	0	0.0775987
A730071L15Rik	0.00610702	0.0187337	0	0	0.0205885	0.0339673	0.018904	0.0106652	0.0273611	0.0192662	0.0274514	0	0.0157533	0.0285834	0.0210045	0.0203867	0.0137711	0	0.0151784	0.0245013	0.037671	0	0.00943057	0	0	0.038085	0.00815467	0.0308065	0.0187337	0.035546	0.00924196	0.0291851	0.0407734	0.00894383	0.0201717	0.00577623	0.0189903	0.0101933	0	0	0	0	0.0088865	0.0440093	0.0231049	0.0353647	0.044555	0	0.0132028
A730081D07Rik	0	0	0	0	0	0	0	0	0	0.0074532	0.00686284	0	0	0.00714585	0.00525112	0	0	0	0.00505947	0	0	0	0	0	0	0	0.00815467	0	0	0	0.00462098	0	0	0.00447192	0.0046993	0	0	0	0	0	0	0	0.0088865	0	0	0	0	0	0
A730082K24Rik	0	0	0	0	0	0	0	0	0	0	0	0	0	0	0	0	0	0	0.00505947	0	0	0	0.0141459	0	0	0	0	0	0	0	0	0	0	0	0	0	0	0	0	0	0	0	0	0	0	0	0	0	0
A730085K08Rik	0	0	0	0	0	0	0	0	0	0	0.00686284	0	0	0	0	0	0	0	0	0	0	0	0	0.00924196	0	0	0	0	0	0	0	0	0	0.00447192	0	0	0	0	0	0	0	0	0	0	0	0	0.0117483	0	0
A730090N16Rik	0	0	0	0	0.00686284	0.00320901	0.00945201	0.00412588	0.00456018	0	0	0	0.0157533	0	0	0	0	0	0	0.00438701	0	0	0	0	0	0	0	0.00770164	0	0	0	0	0	0	0	0	0	0	0	0	0.00468343	0	0.0088865	0	0	0.0141459	0.0117483	0	0
A830005F24Rik	0.00305351	0.0281006	0	0	0.00686284	0.00962704	0.0126027	0.00412588	0.0182407	0.0149064	0.00686284	0.0203867	0	0	0	0.00815467	0.00918076	0.0106638	0	0.00877401	0.0150684	0.00962704	0.00471529	0	0	0.030468	0.00815467	0.0231049	0	0.017773	0.00924196	0.0145926	0	0.00447192	0.00939861	0.0231049	0.00316506	0.0131747	0	0	0.00468343	0.00900191	0	0.0110023	0.0115525	0.0212188	0.0234965	0	0.0066014
A830008E24Rik	0.00305351	0.00936685	0	0	0.00686284	0	0.00315067	0.00412588	0	0.0074532	0	0	0	0	0	0	0.00459038	0.0382293	0	0.00438701	0	0.0152585	0	0	0.00877401	0	0	0	0	0	0	0	0	0.00447192	0	0	0.00316506	0	0.0385082	0	0	0	0	0.0110023	0	0	0	0	0.0066014
A830009L08Rik	0	0	0	0	0	0	0	0	0.00456018	0	0	0	0	0	0	0	0	0.0106638	0	0	0	0	0	0	0	0	0	0	0	0	0	0	0	0	0	0	0	0	0	0	0.00468343	0	0	0	0	0	0	0	0
A830012C17Rik	0.0109467	0	0	0	0.0137257	0	0	0.00412588	0	0	0.00343142	0	0	0.00714585	0	0	0.00459038	0.0106638	0	0.00877401	0	0	0	0.00924196	0	0.015234	0.024464	0	0	0	0	0	0	0	0	0	0	0	0	0	0.00468343	0	0	0	0	0.00707293	0	0	0
A830018L16Rik	0.206431	0.41534	0.286168	0.22146	0.159012	0.157	0.258824	0.361445	0.491404	0.113064	0.13156	0.297339	0.386111	0.369295	0.376004	0.105704	0.31033	0.292366	0.261472	0.15247	0.289574	0.364207	0.454285	0.311267	0.293198	0.139695	0.0781622	0.0308065	0.233467	0.134808	0.202976	0.341828	0.407734	0.215412	0.325142	0.320203	0.253804	0.0794314	0.176559	0.51986	0.320072	0.287914	0.357653	0.278798	0.420702	0.101425	0.0891101	0.290774	0.328463
A830035A12Rik	0.00305351	0	0.0165035	0	0.0274514	0.00962704	0.00315067	0.0206294	0.0136805	0	0.00543867	0.0203867	0	0.00714585	0.0105022	0.012232	0.00459038	0.0106638	0.00505947	0	0.0150684	0	0.00943057	0	0.00877401	0.015234	0.0163093	0.00770164	0	0	0.0184839	0.0145926	0	0.00894383	0.00704895	0	0.0126602	0.00509667	0	0	0	0.0180038	0.0444325	0.0110023	0	0	0	0.0231049	0.0302672
A830035O19Rik	0.00305351	0	0.0165035	0.0231049	0.0274514	0.0160451	0.00315067	0.00412588	0.0136805	0.0149064	0.0205885	0	0	0.0142917	0	0.00407734	0.00459038	0.0319914	0.00505947	0	0	0	0.00471529	0.0277259	0.00877401	0	0.00815467	0.0231049	0	0.017773	0	0	0	0.00894383	0.00939861	0	0	0.01529	0	0	0.0140503	0.0180038	0	0	0	0.00707293	0.0117483	0	0
A830052D11Rik	0.00305351	0	0	0	0.0137257	0.00508617	0.00315067	0.00825175	0.00456018	0.0074532	0.00686284	0	0	0	0	0.00407734	0	0.0106638	0.00505947	0.00877401	0	0.0192541	0.00471529	0.00924196	0.00877401	0	0	0.00770164	0	0	0.00462098	0	0	0	0.0046993	0	0	0.0284647	0	0	0	0	0	0	0	0.00707293	0.00587413	0	0
A830082K12Rik	0.00610702	0	0	0	0	0	0	0.00412588	0	0.0074532	0	0.0203867	0	0	0.0105022	0.06116	0	0	0	0.0691168	0.0150684	0.00962704	0.00943057	0	0	0	0.00815467	0.0539114	0	0	0	0	0	0.00708782	0.00234965	0	0.00633011	0	0	0	0.00468343	0	0	0	0	0.00707293	0	0	0
A830082N09Rik	0.0414818	0.0671596	0.033007	0.0828302	0.0549027	0.0403853	0.0220547	0.0395464	0.0482693	0.073838	0.0343142	0.154632	0.0407218	0.0214375	0.0450806	0.0652374	0.0439986	0.056752	0.0586138	0.0307091	0.0226026	0.0385082	0.0432388	0.0369678	0.026322	0.022851	0.0455435	0.0231049	0.0335798	0.035546	0.0415888	0.0669064	0	0.0454791	0.0366192	0.0288811	0.0348156	0.0386581	0.0385082	0	0.0562011	0.0450096	0.0674038	0.0220047	0.0231049	0.0719312	0.0680516	0	0.04347
A930001A20Rik	0	0	0	0	0	0	0	0	0	0	0	0	0	0	0	0	0	0	0	0	0	0	0.00471529	0.00924196	0	0	0	0	0	0	0	0.00729629	0	0	0	0.0115525	0	0	0	0	0	0	0	0	0	0	0	0	0
A930001C03Rik	0.00610702	0.0187337	0	0.115525	0.0177402	0.0224631	0.00630134	0.0123776	0.0136805	0	0.0137257	0.0203867	0.0315067	0.0142917	0.0157533	0.00407734	0.00918076	0.0106638	0.0101189	0.0307091	0.00753421	0.00962704	0.00471529	0.00924196	0.00877401	0	0.00815467	0.0231049	0.00936685	0.017773	0.0138629	0	0	0.00447192	0.00842341	0.00577623	0	0.0203867	0	0	0.0140503	0.00900191	0.0266595	0	0	0.0353647	0.0117483	0.0231049	0.0198042
A930001M01Rik	0.00610702	0.0187337	0	0	0	0.00320901	0.0175964	0.00825175	0	0	0.0205885	0	0.0157533	0	0	0.012232	0.0183615	0.0319914	0.00505947	0	0	0.00962704	0.00471529	0.00924196	0.026322	0.015234	0	0.00770164	0.0187337	0	0	0.0188606	0	0.00447192	0.00704895	0.00577623	0.0176767	0.00509667	0	0	0.0140503	0.00900191	0	0	0.0231049	0	0.00587413	0	0.0066014
A930002C04Rik	0	0	0	0	0	0.00962704	0	0.00825175	0.00456018	0.0074532	0	0	0.0157533	0	0	0	0.00918076	0	0	0	0	0	0	0	0	0	0.00815467	0.00770164	0	0.035546	0	0	0	0	0.0046993	0	0.00949517	0	0.0385082	0	0	0	0	0.0220047	0	0	0.00587413	0	0.0066014
A930004D18Rik	0.0567494	0.104627	0.141682	0.0231049	0.0480399	0.0762298	0.0793021	0.0618881	0.0410416	0.0341726	0.0343142	0.0407734	0.0787667	0.139286	0.0735156	0.0700076	0.0834068	0.0106638	0.09403	0.0665506	0.140023	0.0537667	0.0612987	0.112474	0.110421	0.038085	0.024464	0.0385082	0.00936685	0.035546	0.0812598	0.0742027	0.105398	0.0581349	0.0820611	0.0957985	0.0796642	0.01529	0.0385082	0.173287	0.0936685	0.086283	0.053319	0.0944546	0.117488	0.0424376	0.046993	0.115525	0.0594126
A930005H10Rik	0.282255	0.360715	0.352182	0.331321	0.438717	0.242857	0.330943	0.310533	0.43926	0.406284	0.400383	0.467361	0.376896	0.335318	0.353618	0.397973	0.320554	0.313694	0.348822	0.368265	0.352975	0.399616	0.349023	0.371959	0.457911	0.479447	0.354195	0.353571	0.345165	0.241446	0.387823	0.394142	0.472358	0.379864	0.318804	0.394859	0.353002	0.401613	0.292083	0.173287	0.305142	0.369931	0.38816	0.344562	0.351387	0.369006	0.288389	0.207944	0.389612
A930006K02Rik	0.00610702	0.0187337	0.033007	0.12904	0.0451916	0.0192541	0.0252054	0.0247553	0.0345888	0.0074532	0.0274514	0	0.0315067	0.00714585	0.0367578	0.00815467	0.0210467	0.0213276	0.0231975	0.017548	0.0301368	0.0288811	0.0235764	0.0423741	0.0314545	0.022851	0	0.0154033	0.0374674	0.035546	0.0415888	0.0145926	0	0.0223596	0.0164476	0.0438125	0.0158253	0.0569294	0.0385082	0	0.0281006	0.0502753	0.017773	0.033007	0.0115525	0.0141459	0.0176224	0	0.0264056
A930006L05Rik	0	0	0	0	0	0.00320901	0.00315067	0.0123776	0	0	0.00343142	0	0	0.00714585	0.00525112	0.00407734	0.00459038	0	0	0	0	0	0	0.00924196	0.00877401	0	0	0	0	0	0.00462098	0.00729629	0	0	0.00704895	0	0.00316506	0.01529	0	0	0	0.00900191	0	0	0	0	0.0176224	0	0
A930007I19Rik	0.0213746	0.0187337	0	0.0924196	0.0137257	0	0.018904	0.0312946	0.039149	0.0447192	0.0205885	0.0203867	0.0157533	0.0214375	0.0210045	0.0163093	0.0229519	0.0106638	0.018138	0.0332753	0.0150684	0.00962704	0.0188611	0.00924196	0.026322	0.022851	0.0163093	0.0231049	0.0468343	0.017773	0.0138629	0.0218889	0	0.0134158	0.0234965	0.0207076	0.0411457	0.0101933	0.0385082	0	0.032784	0.0270057	0.053319	0.033007	0.0414151	0.0212188	0.155617	0.0231049	0.0066014
A930012L18Rik	0.00305351	0.00936685	0	0	0.00686284	0	0	0	0.00456018	0	0.00343142	0	0	0.00714585	0.0105022	0	0.00459038	0	0	0.00438701	0	0	0	0.00924196	0	0	0	0.00770164	0	0	0	0.00729629	0	0	0.0046993	0	0.00316506	0	0	0	0.00468343	0.0180038	0	0	0	0	0.00587413	0	0
A930012O16Rik	0.00610702	0.00936685	0.0165035	0	0.0205885	0.00641803	0.0157533	0.00825175	0.0117879	0.0074532	0.0191644	0	0	0	0	0.00815467	0.00918076	0	0.0252973	0.00877401	0.00753421	0.0192541	0.0121888	0.00924196	0.00877401	0.015234	0.024464	0.00770164	0.00936685	0	0.0277259	0.00729629	0.0407734	0.00894383	0.0187972	0.0115525	0.00949517	0.0212527	0	0	0.00936685	0.00900191	0.0088865	0.0284406	0.0115525	0.0141459	0.00587413	0	0.0132028
A930014D07Rik	0	0	0	0	0	0.00320901	0	0	0	0	0.00686284	0	0	0	0	0	0	0	0	0	0	0	0	0	0	0	0	0	0	0	0	0	0	0	0	0	0	0	0	0	0	0	0	0	0	0	0	0	0
A930014E10Rik	0.0170537	0	0.033007	0.0462098	0.00686284	0	0.00315067	0.0123776	0.0163481	0	0.00343142	0	0.0157533	0.0142917	0.00525112	0.00407734	0.0183615	0.0106638	0.00505947	0.00438701	0.0150684	0	0.0188611	0	0.017548	0.015234	0	0	0	0.071092	0.0138629	0.00729629	0	0.0410071	0.0187972	0.0173287	0.0189903	0	0	0	0.00936685	0.0180038	0.0266595	0.0220047	0.0115525	0.00707293	0	0	0.04347
A930015D03Rik	0.129056	0.218621	0.243507	0.22146	0.160538	0.142833	0.128405	0.18526	0.141366	0.127971	0.124697	0.0730855	0.0787667	0.158423	0.229643	0.111474	0.126625	0.149293	0.123147	0.123582	0.14443	0.115525	0.152492	0.1402	0.149832	0.170163	0.130475	0.112328	0.12884	0.0814886	0.164792	0.140978	0.0815467	0.166981	0.137835	0.149748	0.177543	0.123186	0.154033	0.173287	0.14837	0.176302	0.175552	0.105457	0.17525	0.180302	0.10917	0.152145	0.17114
A930016O22Rik	0	0	0	0	0	0	0	0	0.00456018	0.0149064	0	0	0	0	0.00525112	0	0.00459038	0	0	0.00438701	0	0	0	0.00924196	0	0	0	0.0154033	0	0	0	0	0	0	0	0	0	0	0.0385082	0	0.00468343	0	0	0.0110023	0	0	0	0	0
A930017K11Rik	0.00305351	0.00936685	0	0	0	0.00641803	0.00315067	0.00412588	0	0.0149064	0.0102943	0	0	0	0	0.0163093	0.00459038	0	0.0101189	0	0	0	0.00943057	0.00924196	0	0.007617	0.0163093	0.159847	0	0.035546	0	0	0	0	0.00704895	0	0	0.00807803	0	0	0	0	0	0.0110023	0.0115525	0.00707293	0	0	0
A930018P22Rik	0	0	0	0.0462098	0	0	0	0	0	0	0	0	0	0	0.00525112	0	0.00459038	0	0	0	0.00753421	0	0	0	0.00877401	0.007617	0	0	0	0	0	0.00729629	0	0	0	0	0	0	0	0	0	0	0	0	0	0.00707293	0	0	0
A930023M06Rik	0.00305351	0	0	0	0	0	0.00315067	0	0	0.0149064	0.00686284	0	0	0.00714585	0	0.00407734	0.00459038	0	0.00505947	0.00438701	0	0	0.00747355	0	0	0.007617	0	0.00770164	0	0	0	0	0	0	0	0	0.00633011	0	0	0	0	0	0	0	0	0.0212188	0.0117483	0	0
A930024E05Rik	0.0791617	0.142094	0.0495105	0	0.121849	0.117947	0.101357	0.0584634	0.107127	0.037266	0.0308828	0.0203867	0.14178	0.13402	0.0901613	0.0390811	0.122035	0.053319	0.242094	0.0884856	0.0722151	0.0730208	0.106495	0.0885839	0.0877401	0.053319	0.0652374	0.0815215	0.171787	0.0637156	0.0947753	0.128305	0	0.131965	0.111631	0.127077	0.0733341	0.0284647	0.13805	0	0.150665	0.278382	0.0762903	0.1449	0.0828302	0.0819396	0.0739257	0.0693147	0.0462098
A930028N01Rik	0	0	0	0.0231049	0.00686284	0	0	0	0.00456018	0.0074532	0	0	0	0	0	0	0	0	0.00505947	0	0	0.00962704	0.00747355	0.00924196	0	0	0	0.00770164	0	0	0.0184839	0	0	0.0134158	0.00234965	0	0	0	0	0	0	0	0.0088865	0.0110023	0.0115525	0.00707293	0.0117483	0	0
A930029G22Rik	0.0183211	0.0281006	0.0165035	0.0231049	0.0480399	0	0.0157533	0.0312946	0.0182407	0.0074532	0.0260272	0	0.0315067	0.0327634	0.0293273	0.024464	0.0275423	0.0319914	0.0151784	0.0288883	0.0301368	0.00962704	0.0188611	0	0.017548	0.030468	0.024464	0	0.0374674	0.071092	0.0138629	0.0218889	0	0.0223596	0.0201717	0.00577623	0.0221554	0.0254834	0	0	0.0308402	0.0270057	0.0548291	0.0110023	0.0346574	0.0565834	0.0293706	0.0231049	0.0198042
A930033H14Rik	0.00305351	0	0	0	0	0.0160451	0.00630134	0.00412588	0.00456018	0.0074532	0.00686284	0.0203867	0	0	0.00525112	0.00646243	0	0.0106638	0.0101189	0.0394831	0	0	0	0	0	0	0.00815467	0.0199084	0	0	0.00462098	0	0	0.00447192	0	0	0.00316506	0.00509667	0	0	0	0.00900191	0	0	0	0	0	0	0
A930033M14Rik	0.00305351	0.00936685	0	0	0	0.00320901	0	0.00412588	0	0	0	0	0	0	0.00525112	0	0.00459038	0	0.0101189	0	0.00753421	0	0.00943057	0	0.017548	0.007617	0	0	0	0	0.00462098	0.00729629	0	0.0134158	0.00939861	0.0115525	0.0113466	0	0	0	0.00468343	0	0.0088865	0	0.0115525	0	0.00587413	0	0
A930037H05Rik	0.0712685	0.140503	0.165035	0.0231049	0.0754913	0.0949386	0.104507	0.0766793	0.0737377	0.049079	0.0986701	0.06116	0.103735	0.0684927	0.0765873	0.0577756	0.122035	0.053319	0.0404757	0.0701921	0.0904105	0.126787	0.108452	0.0978258	0.0877401	0.038085	0.0326187	0.0462098	0.0804141	0.088865	0.0978258	0.0656666	0.24464	0.0607508	0.0820611	0.0924196	0.090473	0.0743347	0.115525	0.173287	0.0382632	0.122291	0.10295	0.066014	0.133835	0.0677938	0.0704895	0.0693147	0.0698756
A930038B10Rik	0.00305351	0.00936685	0	0	0	0	0.00315067	0.00412588	0.0136805	0.0074532	0	0	0.0157533	0	0.00525112	0	0.0183615	0.0382293	0.00505947	0.00438701	0	0	0.00471529	0.00924196	0.00877401	0	0	0	0.0187337	0	0.0138629	0	0.0407734	0	0.0046993	0.0115525	0	0	0	0	0	0	0.0088865	0	0.0183102	0.00707293	0.0117483	0	0.0132028
A930041C12Rik	0	0	0	0	0	0.00320901	0	0.00412588	0	0	0.00343142	0	0	0	0.0105022	0	0	0	0	0	0	0	0.00471529	0	0	0	0	0	0.00936685	0	0	0	0	0	0	0	0.00316506	0	0	0	0	0	0	0	0	0	0	0	0
AA386476	0.0615891	0.0562011	0.0756679	0.0462098	0.11382	0.110984	0.0837604	0.0725534	0.039149	0.0894383	0.115244	0.0730855	0.0722285	0.0857502	0.0586546	0.0839318	0.0807216	0.0764587	0.115128	0.0595973	0.0615539	0.0770164	0.0404806	0.0700999	0.0665506	0.060936	0.0944716	0.00770164	0.132728	0.035546	0.072803	0.0918235	0.105398	0.0696947	0.0732385	0.0577623	0.0796642	0.0335614	0.0770164	0	0.0683076	0.104287	0.129609	0.151336	0.105935	0.0707293	0.0915481	0.0462098	0.0830784
AA388235	0.00610702	0.00936685	0	0	0.00686284	0.00320901	0.00315067	0	0	0.0223596	0.00686284	0.0203867	0	0	0.0105022	0	0.00918076	0.0213276	0.0101189	0	0.00753421	0.00962704	0.00943057	0.00924196	0.00877401	0.015234	0.0163093	0	0	0	0.00924196	0.0218889	0	0.0178877	0.0046993	0.00577623	0.0221554	0.0101933	0	0	0.0187337	0.00900191	0	0.033007	0	0.0212188	0.0176224	0.0231049	0
AA465934	1.37877	1.47703	1.40185	1.9194	1.52557	1.45651	1.50569	1.37118	1.29193	1.44254	1.45474	1.28087	1.35802	1.31039	1.43009	1.317	1.45114	1.45024	1.46296	1.32681	1.43801	1.20591	1.40533	1.27829	1.17556	1.38751	1.37194	1.11204	1.61576	1.25106	1.3769	1.32234	1.46938	1.45737	1.52387	1.41919	1.49168	1.35517	1.26429	1.90023	1.43492	1.48966	1.51439	1.49044	1.45441	1.33714	1.3958	1.40733	1.34317
AA467197	0.0865361	0.0749348	0.108675	0.0828302	0.0903831	0.0652709	0.0892895	0.114513	0.0919785	0.0596256	0.0677873	0.161195	0.0945201	0.101256	0.105022	0.0530054	0.0459038	0.0746466	0.0505947	0.0533896	0.0916908	0.0288811	0.109253	0.0554518	0.0438701	0.0501577	0.0163093	0.0154033	0.0749348	0.053319	0.0693147	0.0802591	0	0.0812544	0.0614902	0.0577623	0.0968031	0.0335614	0.0385082	0	0.0468343	0.0555411	0.088865	0.0880187	0.0693147	0.0831415	0.0646154	0.115525	0.0462098
AA986860	0.00305351	0	0.0165035	0.0231049	0.0137257	0.0128361	0.00945201	0.00412588	0.0182407	0	0.0102943	0.0203867	0.0157533	0.0470551	0.0105022	0.0163093	0.0229519	0.0106638	0	0.00438701	0.0119414	0.192541	0.0282917	0.0331321	0	0.053319	0.0863169	0.0276101	0	0	0	0	0	0	0.00939861	0	0	0.210105	0	0	0.0140503	0	0	0	0	0.0424376	0.0352448	0	0.0066014
Aaas	0.822476	0.763353	0.719331	0.652638	0.881113	0.808174	0.886126	0.726437	0.95452	0.713144	0.716983	0.812036	0.739248	0.732591	0.860308	0.729576	0.79182	0.741464	0.865486	0.855563	0.792004	0.726967	0.805197	0.731399	0.871195	0.7935	0.941175	0.725125	0.921565	0.854498	0.830609	0.841971	0.80002	0.89164	0.794021	0.819898	0.772719	0.612317	0.467077	1.06917	0.802443	0.809527	0.845308	0.717832	0.866283	0.785546	0.608942	0.954777	0.901277
Aacs	0.118339	0.145982	0.174689	0.138629	0.238517	0.220153	0.146774	0.172977	0.256152	0.287021	0.225958	0.361963	0.150995	0.161389	0.0954124	0.230103	0.160318	0.161769	0.166582	0.156857	0.136896	0.209435	0.184343	0.228784	0.185745	0.194308	0.269731	0.375909	0.235763	0.231049	0.189898	0.175111	0.210795	0.145381	0.153127	0.213286	0.15276	0.178	0.199084	0	0.175674	0.175625	0.268788	0.193476	0.186802	0.142002	0.147304	0.161734	0.341666
Aadac	0	0	0	0	0	0	0	0	0	0	0.00343142	0	0	0	0	0	0.00459038	0	0	0	0	0	0	0	0	0	0	0	0	0	0	0	0	0.00447192	0	0	0	0	0	0	0	0	0	0	0	0	0	0	0
Aadat	0.00305351	0	0	0	0	0	0.00315067	0	0	0.0074532	0.00686284	0.0203867	0	0	0.00525112	0	0	0	0.00505947	0	0	0	0	0	0	0.007617	0	0	0	0	0	0.00729629	0	0	0.00234965	0.00577623	0.00316506	0	0	0	0	0	0.0088865	0	0	0.0212188	0.0293706	0	0
Aagab	0.341075	0.382632	0.375535	0.281185	0.452566	0.469376	0.430704	0.434633	0.380134	0.360992	0.429062	0.38235	0.326959	0.370509	0.397806	0.334042	0.414004	0.389333	0.295648	0.334911	0.270665	0.325872	0.380436	0.475357	0.302789	0.302104	0.403123	0.529363	0.397311	0.381975	0.404041	0.468893	0.292342	0.347465	0.430262	0.391377	0.417378	0.403219	0.398169	0.621227	0.318924	0.358723	0.440651	0.438439	0.437256	0.328429	0.37507	0.410225	0.368686
Aak1	0.146858	0.226396	0.257206	0.198355	0.183615	0.267198	0.194332	0.208397	0.297276	0.371539	0.26196	0.324654	0.241654	0.253747	0.220152	0.22464	0.191326	0.199998	0.198568	0.154291	0.234841	0.261566	0.206317	0.221112	0.212741	0.271772	0.341124	0.521257	0.261568	0.188127	0.217624	0.184887	0.24464	0.152805	0.188993	0.265272	0.174378	0.39246	0.430133	0.173287	0.160032	0.222841	0.225183	0.206348	0.198355	0.386214	0.433706	0.311728	0.300428
Aamdc	0.487979	0.509177	0.430655	0.417663	0.418768	0.488201	0.477424	0.497229	0.462649	0.456057	0.385233	0.333115	0.573684	0.451414	0.503815	0.384362	0.437743	0.46398	0.46643	0.439999	0.443385	0.383634	0.424476	0.459138	0.526612	0.505908	0.390198	0.459331	0.358252	0.47386	0.381201	0.462288	0.526988	0.478254	0.463737	0.532753	0.476682	0.533802	0.391625	0.44794	0.427523	0.354987	0.607013	0.482448	0.450772	0.486437	0.454047	0.43333	0.456522
Aamp	2.41513	2.45148	2.35683	2.00914	2.31049	2.49038	2.45433	2.48616	2.36777	2.10127	2.3546	2.06154	2.44263	2.48389	2.53598	2.48945	2.45411	2.46991	2.29972	2.19362	2.46778	2.3312	2.4525	2.32934	2.22106	2.22278	2.08263	1.92129	2.16078	2.50374	2.47259	2.45968	2.49945	2.44186	2.46118	2.4918	2.47118	2.28747	2.30855	2.42504	2.51427	2.39042	2.48562	2.42487	2.45196	2.37983	2.23449	2.43867	2.08291
Aar2	0.354971	0.682555	0.540302	0.436842	0.556036	0.543005	0.616419	0.471624	0.530397	0.664577	0.524951	0.506236	0.576361	0.475818	0.519483	0.496456	0.519943	0.493794	0.463569	0.562045	0.441404	0.490995	0.511755	0.513895	0.549967	0.462782	0.611773	0.485945	0.524727	0.515446	0.533436	0.491343	0.503137	0.485941	0.514197	0.49012	0.504527	0.561225	0.468642	0.274653	0.509361	0.570194	0.468662	0.409998	0.471913	0.390225	0.425941	0.364015	0.501728
Aard	0.417121	0.374689	0.547045	0.313879	0.34432	0.385921	0.484189	0.557071	0.479617	0.491802	0.387505	0.484283	0.712712	0.514524	0.64273	0.369359	0.636572	0.648159	0.516134	0.416238	0.388937	0.270469	0.243962	0.289266	0.426917	0.432451	0.253567	0.0430133	0.234678	0.453385	0.501213	0.627255	0.648577	0.488141	0.530565	0.69261	0.583951	0.42793	0.536219	0.9678	0.483511	0.342925	0.479919	0.454656	0.604203	0.173356	0.24514	0.54104	0.244877
Aars	1.58309	1.56967	1.50089	2.01257	1.48472	1.69941	1.76167	1.56923	1.68574	1.85205	1.83185	1.7712	1.62503	1.60987	1.51186	1.52318	1.63916	1.70904	1.50728	1.68951	1.54269	1.5722	1.58661	1.57988	1.63934	1.46571	1.64312	1.83066	1.6989	1.57327	1.61269	1.45229	1.57193	1.64367	1.643	1.59716	1.61659	1.65982	1.59181	1.64481	1.59002	1.41803	1.58348	1.56732	1.44967	1.49327	1.55995	1.47692	1.52805
Aars2	0.330258	0.423987	0.503518	0.327395	0.284875	0.443158	0.425304	0.526804	0.507051	0.265234	0.366332	0.361963	0.496384	0.498597	0.485797	0.384735	0.556126	0.472849	0.391397	0.328703	0.499966	0.326596	0.472075	0.365148	0.388179	0.409463	0.405602	0.242677	0.419228	0.339052	0.480952	0.426355	0.608535	0.470486	0.452565	0.485656	0.515976	0.273205	0.491167	0.621227	0.505313	0.391671	0.471158	0.452983	0.43333	0.272377	0.189527	0.564145	0.366335
Aarsd1	1.67496	1.84371	1.83652	1.53038	1.71208	1.77078	1.75023	1.69064	1.67712	1.63296	1.69016	1.61573	1.8412	1.71861	1.7698	1.67588	1.77714	1.61464	1.68824	1.83292	1.57415	1.68518	1.78242	1.77231	1.59028	1.84716	1.72675	1.48874	1.75345	1.68931	1.65043	1.77612	1.60196	1.76024	1.76279	1.81358	1.72858	1.3402	1.43943	1.26879	1.75996	1.69303	1.76551	1.83663	1.89123	1.55579	1.37422	1.83606	1.83673
Aasdh	0.176126	0.218621	0.283364	0.0462098	0.243698	0.234866	0.250272	0.219062	0.213986	0.196316	0.205627	0.248104	0.273161	0.196581	0.20965	0.186252	0.236449	0.151105	0.257652	0.20735	0.296395	0.142046	0.17331	0.23576	0.190878	0.294623	0.313421	0.133407	0.289668	0.198523	0.265404	0.167815	0.146171	0.243763	0.237142	0.215683	0.204177	0.133379	0.127921	0	0.190077	0.197365	0.251842	0.232919	0.214702	0.153871	0.206593	0.288623	0.218353
Aasdhppt	1.48646	1.65104	1.49506	1.40307	1.46839	1.49815	1.55881	1.49879	1.42693	1.3386	1.48531	1.38697	1.53113	1.56998	1.58519	1.34527	1.59089	1.35272	1.54415	1.49522	1.37956	1.48025	1.55525	1.49055	1.43404	1.23083	1.38096	1.09108	1.49859	1.27792	1.54071	1.48678	1.41069	1.4893	1.56364	1.51619	1.55562	1.21468	1.44092	1.39961	1.54075	1.64533	1.60612	1.61206	1.60887	1.34561	1.24419	1.46518	1.6305
Aass	0.0183211	0.0562011	0.0165035	0	0.0205885	0.0160451	0.028356	0.0560499	0.0596326	0.0223596	0.00686284	0	0.0630134	0.0613468	0.0262556	0.0163093	0.0321327	0.0106638	0.018138	0.00877401	0.0496125	0	0.0216194	0.0423741	0.0490025	0	0.0292342	0.0154033	0.0187337	0	0.0184839	0.0364814	0.0646243	0.0428632	0.0389689	0.0404336	0.0474758	0.0335614	0	0	0.0468343	0.0450096	0.053319	0.0220047	0.0231049	0.00707293	0.0117483	0.0828302	0.0132028
Aatf	1.22514	1.28094	1.35406	0.984381	1.26963	1.22244	1.36789	1.31921	1.157	1.14489	1.21838	1.33357	1.26267	1.37522	1.32915	1.24064	1.15929	1.06607	1.12355	1.29748	1.28548	1.12988	1.25203	1.29601	1.25252	1.30714	1.23463	1.07653	1.39089	1.19315	1.29364	1.15763	1.21494	1.31674	1.29056	1.2739	1.32232	0.866753	0.869078	1.19687	1.04003	1.32299	1.32086	1.29296	0.996743	1.99904	2.27729	1.38192	1.26244
Aatk	0	0.00936685	0.0165035	0	0	0.0128361	0.00630134	0.00412588	0.00456018	0	0.00686284	0	0.0157533	0.00714585	0	0.00815467	0.00459038	0	0	0	0	0	0	0.0184839	0	0	0.00815467	0	0	0.017773	0.00462098	0.00729629	0	0.00447192	0.00234965	0.0115525	0	0.0203867	0	0	0.00936685	0	0	0	0.0115525	0	0.0117483	0.0231049	0.0066014
AB041806	0	0.00936685	0	0	0	0.0115042	0.00630134	0	0	0.0074532	0	0	0.0157533	0	0	0.00407734	0	0	0	0.00438701	0	0	0.00471529	0	0.00877401	0.015234	0	0.00770164	0	0	0	0.00729629	0	0	0.00234965	0.00577623	0.00633011	0	0	0	0	0	0.0088865	0	0	0	0	0	0
AB124611	0	0	0	0	0	0	0	0	0	0	0	0	0	0	0	0.012232	0	0	0	0	0	0	0	0	0	0	0	0	0	0	0	0	0	0.00447192	0	0	0	0	0	0	0	0	0	0	0	0.00707293	0	0	0
Abat	0.037161	0.0991478	0.033007	0.0231049	0.0451916	0.0385082	0.0585551	0.051924	0.0573897	0.0416258	0.0343142	0.0407734	0.097197	0.0285834	0.0420089	0.0285414	0.036723	0.0915483	0.0354163	0.0307091	0.0301368	0.00962704	0.0782029	0.0277259	0.0490025	0.015234	0.0733921	0.112328	0.0562011	0.124411	0.0323469	0.0334532	0.0407734	0.0294474	0.0399441	0.0404336	0.0208418	0.0407734	0.0770164	0.173287	0.0281006	0.0450096	0.0266595	0.0440093	0.0693147	0.167358	0.0925462	0.0462098	0.0198042
Abca1	0.248174	0.221636	0.224199	0.142556	0.269344	0.243781	0.22448	0.308679	0.446974	0.106878	0.112396	0.0934722	0.350461	0.360947	0.327183	0.146098	0.317524	0.289735	0.181289	0.148828	0.26499	0.409087	0.431949	0.32889	0.323979	0.194171	0.107396	0.280468	0.442508	0.142184	0.374042	0.346526	0.703208	0.253365	0.31584	0.414585	0.284327	0.20176	0.375643	0.659764	0.403342	0.215369	0.395073	0.321782	0.306046	0.1025	0.183547	0.442919	0.114467
Abca12	0	0	0	0	0	0	0	0	0.0203358	0.0074532	0	0	0	0	0	0	0	0	0	0	0	0	0.00471529	0	0	0	0.00815467	0	0	0	0	0	0	0	0	0	0.00316506	0	0.108106	0	0	0	0	0	0	0	0.00587413	0	0.0066014
Abca13	0	0	0	0	0	0	0	0	0.00912036	0	0	0	0	0	0	0	0	0	0	0	0	0	0	0	0	0	0	0	0	0	0	0.00729629	0	0	0.00234965	0	0	0	0	0	0	0	0	0	0	0	0	0	0
Abca14	0.012214	0	0	0	0.00686284	0.00320901	0.00945201	0	0.055497	0.0074532	0.0102943	0.0203867	0.0157533	0.0214375	0.00525112	0.012232	0.00459038	0	0	0.00438701	0	0.0192541	0.00471529	0.00924196	0	0	0.0129249	0	0	0	0	0.00729629	0	0.00894383	0.0187972	0.00577623	0.00818155	0.0913569	0.0385082	0	0.0187337	0.00900191	0	0	0	0	0	0.0231049	0.0066014
Abca16	0	0.0187337	0	0	0	0	0	0.00412588	0.00456018	0	0	0	0	0	0.00525112	0.00407734	0	0	0	0	0	0	0	0.00924196	0	0	0	0	0	0	0	0	0	0.00447192	0	0	0	0.00509667	0	0	0	0.00900191	0.0088865	0	0	0	0	0	0
Abca2	0.0628564	0.0991478	0.151336	0.0462098	0.0795058	0.105111	0.0787667	0.0536364	0.0364814	0.119251	0.0754913	0.113859	0.0945201	0.104222	0.113345	0.0570827	0.103674	0.0915483	0.0607136	0.0526441	0.0496125	0.0577623	0.107296	0.0462098	0.0701921	0.060936	0.048928	0.0552201	0.0374674	0.0814886	0.0508308	0.0437777	0.0815467	0.0607508	0.0601157	0.0784698	0.0854565	0.0641414	0.0385082	0	0.0964082	0.122291	0.0799785	0.0770164	0.0693147	0.0565834	0.105734	0.0231049	0.0671358
Abca3	0.0816964	0.0749348	0.108675	0.115525	0.13156	0.120611	0.0882187	0.0766793	0.0847508	0.105611	0.0869517	0.134246	0	0.104222	0.0787667	0.0798545	0.0761313	0.129778	0.0484948	0.0570311	0.0496125	0.150037	0.101779	0.0831777	0.0665506	0.184102	0.0781622	0.206056	0.0897809	0.241446	0.0646937	0.107656	0.146171	0.0607508	0.0887108	0.0808672	0.0720205	0.138476	0.154033	0.173287	0.0616804	0.086283	0.0762903	0.033007	0.0876249	0.229939	0.201717	0.0924196	0.109484
Abca4	0.00305351	0	0	0.0462098	0	0.00320901	0.00315067	0.00412588	0.00456018	0.074532	0.097246	0.0815467	0	0.0142917	0.00525112	0	0.00459038	0.0106638	0	0	0	0.00962704	0	0	0	0	0.00815467	0	0	0	0.00924196	0	0	0	0.00234965	0.0115525	0.00633011	0	0	0	0	0	0	0	0	0.00707293	0	0	0.04347
Abca5	0.0755893	0.0281006	0.066014	0.706286	0.0617656	0.138292	0.0806097	0.0783916	0.120114	0.19505	0.154481	0.24464	0.110273	0.0500209	0.0818384	0.0822396	0.0623601	0.12354	0.0535543	0.0884856	0.0571467	0.130783	0.0903917	0.112474	0.0965142	0.116844	0.192328	0.308795	0.0897809	0.152581	0.0831777	0.106416	0.12232	0.0626068	0.0763866	0.115525	0.0733341	0.205599	0.0770164	0	0.0944644	0.099021	0.0814886	0.0440093	0.0529676	0.100223	0.202715	0.0828302	0.0830784
Abca6	0	0	0	0	0	0	0	0.00412588	0	0	0.00343142	0	0	0	0	0.00815467	0	0	0	0	0	0.00962704	0	0	0.00877401	0	0	0	0.00936685	0	0	0	0	0	0.00234965	0.00577623	0	0	0	0	0	0	0	0	0	0	0	0	0.0066014
Abca7	0.0786429	0.0710472	0.132028	0.119451	0.157206	0.105656	0.133399	0.103848	0.0874183	0.0521724	0.0686284	0.113859	0.0630134	0.0357292	0.0975918	0.0203867	0.0826268	0.0959742	0.0708326	0.0288883	0.037671	0.105897	0.0782029	0.125552	0.0928726	0.060936	0.0618529	0.12003	0.065568	0.152581	0.124662	0.0948517	0	0.11779	0.12298	0.101575	0.144041	0.0977028	0.154033	0	0.097204	0.0952849	0.0762903	0.116459	0.0943827	0.0890126	0.0704895	0.105935	0.17388
Abca8b	0	0.00936685	0.0165035	0	0.00686284	0	0.00315067	0.00825175	0.0182407	0	0.00343142	0	0.0157533	0.0214375	0	0.00407734	0.00918076	0.0213276	0.00801907	0	0	0	0	0	0	0	0	0	0.0858933	0.017773	0.00462098	0.00729629	0	0.00447192	0.00234965	0	0.00818155	0.00509667	0	0	0.00468343	0.00900191	0.0088865	0	0	0.00707293	0	0	0
Abcb10	0.179698	0.14987	0.184343	0.188765	0.183615	0.24044	0.174358	0.140981	0.128035	0.401791	0.362699	0.280417	0.103735	0.166783	0.102843	0.141707	0.164908	0.227564	0.223096	0.177308	0.159499	0.199808	0.274211	0.23262	0.235422	0.162546	0.135245	0.50937	0.123361	0.315558	0.248053	0.19824	0.268491	0.149093	0.161373	0.14299	0.158015	0.226468	0.154033	0.173287	0.122565	0.158298	0.211098	0.164011	0.182008	0.110231	0.165032	0.225386	0.181603
Abcb11	0	0	0	0	0	0	0	0	0	0	0	0	0	0	0	0	0	0	0	0	0	0	0	0	0.00877401	0	0	0	0	0	0	0	0	0	0	0	0	0.01529	0	0	0.00468343	0	0	0.0110023	0	0	0	0	0.0066014
Abcb1a	0.112002	0.0749348	0.125178	0.115525	0.124697	0.0831931	0.0937478	0.182172	0.149368	0.145971	0.106699	0.113859	0.173287	0.141165	0.0923407	0.0333115	0.134681	0.102212	0.0404757	0.0526441	0.156372	0.0577623	0.0943057	0.0939901	0.0928726	0.153634	0.0407734	0.116833	0.0913726	0.134808	0.130958	0.11798	0.146171	0.114414	0.115532	0.133835	0.164345	0.0743347	0.0385082	0	0.103831	0.099021	0.142184	0.138464	0.0462098	0.0212188	0.046993	0.115525	0.129288
Abcb1b	0.424484	0.47592	0.607852	0.248491	0.487161	0.458832	0.410673	0.594071	0.555725	0.831623	0.638739	0.833989	0.288914	0.477709	0.559383	0.353171	0.373043	0.267414	0.524087	0.426395	0.428638	0.341854	0.371969	0.392013	0.5627	0.559503	0.730557	1.33709	0.5106	0.661697	0.510414	0.504707	0.536982	0.46522	0.414434	0.536304	0.416304	0.435349	0.50715	0.173287	0.357463	0.464378	0.524841	0.570467	0.493547	0.374716	0.272467	0.460361	0.611333
Abcb4	0.00789321	0.0187337	0	0.0231049	0.00686284	0.00962704	0.00315067	0.00825175	0.0182407	0.0149064	0.0137257	0.06116	0	0.0214375	0.00525112	0.00407734	0.00918076	0	0.00505947	0.00877401	0	0.00962704	0.00747355	0.0277259	0.00877401	0.030468	0.00815467	0.0969248	0.0187337	0	0.0138629	0.0218889	0.0646243	0.00894383	0	0.0115525	0.00949517	0.03058	0	0.173287	0.00468343	0.00900191	0.0088865	0.0220047	0.0115525	0.0141459	0.0293706	0	0.0066014
Abcb5	0	0	0	0	0	0	0.00499369	0	0.00456018	0	0.00343142	0	0	0	0	0.00407734	0.00459038	0	0	0	0	0	0	0	0	0	0	0	0	0	0	0	0	0	0	0.00577623	0	0	0	0	0	0	0	0	0	0	0	0	0.0132028
Abcb6	0.238987	0.272526	0.30518	0.427253	0.21508	0.226026	0.241355	0.217977	0.298051	0.353539	0.435667	0.385814	0.25473	0.263322	0.311206	0.308958	0.297257	0.253317	0.262332	0.327291	0.287014	0.235957	0.287725	0.238026	0.209917	0.338322	0.441751	0.11044	0.337054	0.229713	0.318153	0.190943	0.285414	0.199804	0.30218	0.222441	0.249563	0.24763	0.115525	0.346574	0.235411	0.258849	0.278502	0.193476	0.28598	0.292937	0.291825	0.234975	0.353747
Abcb7	0.440579	0.51536	0.457678	0.657925	0.45879	0.612764	0.558204	0.527438	0.551192	0.594453	0.681002	0.684719	0.592115	0.484983	0.468842	0.572213	0.497336	0.47203	0.438181	0.476047	0.511736	0.46139	0.51167	0.509033	0.459245	0.541541	0.576052	0.525032	0.425579	0.578843	0.454524	0.464506	0.631655	0.541124	0.530507	0.502419	0.464208	0.477471	0.459203	0.346574	0.506713	0.525876	0.565964	0.510889	0.478464	0.557709	0.62932	0.564145	0.552921
Abcb8	0.199057	0.265455	0.184343	0.21187	0.261438	0.273862	0.285707	0.210109	0.299168	0.229222	0.272316	0.39774	0.30199	0.241207	0.240762	0.264414	0.281228	0.225752	0.271591	0.22854	0.303362	0.478836	0.301871	0.23419	0.17333	0.249494	0.286799	0.297897	0.205367	0.241446	0.238811	0.212832	0.203867	0.264267	0.275754	0.270614	0.237441	0.254067	0.237593	0.51986	0.199451	0.222841	0.299963	0.357683	0.347461	0.196308	0.199279	0.234975	0.2338
Abcb9	0.00610702	0.00936685	0	0	0.0137257	0.00962704	0	0.00825175	0.00456018	0.0074532	0.00343142	0.0407734	0.0315067	0	0.0157533	0.00407734	0.00918076	0.0213276	0.0231975	0	0	0	0.00471529	0	0.017548	0.045702	0.00815467	0.0828302	0.0765265	0.017773	0.00462098	0.00729629	0.0407734	0.00447192	0.00234965	0.00577623	0.00316506	0.0560634	0	0	0.00468343	0.0360076	0	0.0220047	0	0	0.0210585	0.0231049	0.0066014
Abcc1	0.300117	0.494163	0.326025	0.202281	0.302615	0.343731	0.328509	0.342535	0.303728	0.594319	0.465647	0.569294	0.351927	0.322789	0.303681	0.291883	0.37347	0.280883	0.309496	0.333835	0.298254	0.467745	0.333722	0.250409	0.257428	0.319926	0.450532	0.277989	0.466934	0.254862	0.347019	0.363038	0.227718	0.28705	0.339156	0.305271	0.313702	0.274454	0.0770164	0.346574	0.286492	0.274646	0.329642	0.302672	0.377531	0.245287	0.334807	0.198355	0.492119
Abcc10	0.0335886	0.065568	0	0.0693147	0.0754913	0.0660574	0.0819174	0.0825175	0.0646174	0.074532	0.0877928	0.0407734	0.0814436	0.0399093	0.0525112	0.106011	0.0669505	0.0426552	0.0505947	0.0595973	0.0678079	0.107533	0.0895905	0.051616	0.0789661	0.126328	0.0652374	0.139938	0.065568	0.071092	0.0331321	0.0699346	0.146171	0.0696947	0.0516923	0.0611411	0.0873079	0.104915	0.115525	0	0.0374674	0.0450096	0.0585173	0.0550117	0.0577623	0.13145	0.10917	0.0462098	0.076477
Abcc12	0.00305351	0	0	0	0	0	0.00315067	0	0	0	0	0	0	0	0	0	0	0	0	0	0	0.00962704	0	0	0	0	0	0	0	0	0	0	0	0	0	0	0	0.0203867	0	0	0	0	0	0	0	0	0	0	0
Abcc2	0.00610702	0	0	0	0	0	0	0	0.00456018	0	0.00343142	0	0	0.00714585	0	0.00407734	0	0	0	0	0	0	0.00471529	0.00924196	0.00877401	0.007617	0.0163093	0	0.00936685	0.017773	0.00924196	0	0	0	0.00234965	0	0	0.0254834	0	0	0.00468343	0	0	0	0	0	0.044555	0	0.0066014
Abcc3	0	0.00936685	0.0165035	0	0.00686284	0.00320901	0.0157533	0	0.00456018	0	0.00686284	0.0407734	0	0.0142917	0.00525112	0.00407734	0.00459038	0	0.0101189	0.00877401	0.00753421	0.00962704	0.00471529	0	0	0	0.00815467	0	0	0	0.0138629	0	0.0407734	0.0134158	0.00704895	0	0.00949517	0.0101933	0	0.173287	0	0.00900191	0.0088865	0.0110023	0	0.0112103	0.0117483	0	0.0198042
Abcc4	0.478139	0.643328	0.631205	0.384969	0.53814	0.475123	0.486516	0.579073	0.594477	0.43483	0.42045	0.309264	0.598935	0.625977	0.64454	0.426375	0.700993	0.807437	0.720289	0.560385	0.38241	0.439604	0.493248	0.515785	0.717965	0.463816	0.413276	0.217684	1.22118	0.453067	0.754235	0.664128	0.649308	0.677832	0.564823	0.704087	0.565035	0.516697	0.215067	0.402359	0.578908	0.58889	0.697186	0.788412	0.626439	0.390351	0.632623	0.475614	0.583577
Abcc5	0.427797	0.451384	0.511636	0.651699	0.502815	0.496495	0.578368	0.598738	0.513773	0.344126	0.553389	0.467361	0.386111	0.522207	0.58278	0.327273	0.484772	0.631813	0.496324	0.369598	0.519306	0.455759	0.532573	0.595351	0.410085	0.547727	0.502991	0.399327	0.623554	0.300805	0.589282	0.509524	0.618529	0.5105	0.568585	0.482494	0.562868	0.291476	0.491167	0.621227	0.558866	0.463701	0.683098	0.52563	0.561501	0.225802	0.309447	0.38712	0.503703
Abcc6	0	0	0	0	0	0	0	0	0	0	0	0	0	0	0	0	0	0	0	0	0	0.00962704	0	0	0	0	0	0	0	0	0.00462098	0	0	0	0	0	0	0.0203867	0	0	0	0	0	0.0110023	0	0	0	0	0
Abcc8	0	0	0	0	0.00686284	0	0.00315067	0.00825175	0.00456018	0.0074532	0.0102943	0	0	0	0	0.012232	0.00918076	0	0	0	0	0	0.00471529	0	0	0.007617	0.0163093	0.0815215	0	0.017773	0	0	0	0.00447192	0	0	0.00316506	0.00509667	0	0	0	0	0.017773	0	0	0	0.0352448	0	0.0132028
Abcc9	0	0	0	0.0231049	0	0	0	0.00412588	0	0	0	0	0	0	0	0	0	0	0.00505947	0	0	0	0	0	0	0	0	0.00770164	0.00936685	0	0	0	0	0	0	0	0	0	0	0	0	0	0	0.0110023	0	0	0	0	0
Abcd1	0.0475889	0.0710472	0.0825175	0.12904	0.0903831	0.0922749	0.0635488	0.0643016	0.06651	0.0714386	0.0720599	0	0.0157533	0.0643126	0.089269	0.0815467	0.0413134	0.0746466	0.0505947	0.0420493	0.0841565	0.0385082	0.0424376	0.0369678	0.0350961	0.184102	0.102626	0.00770164	0.0562011	0.124411	0.0508308	0.0407495	0.0815467	0.0607508	0.067564	0.0981959	0.0429972	0.0203867	0.0385082	0	0.0952602	0.0360076	0.0762903	0.132028	0.0346574	0.0424376	0.0856739	0.138629	0.0132028
Abcd2	0.00610702	0	0	0.0231049	0	0.00320901	0	0.00825175	0.00456018	0	0	0	0.0157533	0	0.00525112	0	0.00459038	0	0.0202379	0	0	0	0	0	0.00877401	0.007617	0	0	0	0	0.00462098	0	0	0	0	0	0.00316506	0	0	0	0.00936685	0	0.0088865	0	0	0	0	0	0
Abcd3	0.570448	0.620002	0.542134	0.88195	0.474198	0.652793	0.608645	0.553906	0.684542	0.59924	0.817302	0.727391	0.668204	0.593922	0.638183	0.640248	0.596689	0.660129	0.499754	0.577753	0.513766	0.623981	0.574132	0.631775	0.527803	1.04447	0.940617	0.526933	0.666501	0.346429	0.553408	0.454182	0.451639	0.594897	0.617306	0.533197	0.606641	0.586294	0.568184	0.173287	0.622376	0.530085	0.622752	0.557595	0.533395	0.711755	0.750556	0.697111	0.921548
Abcd4	0.265486	0.427875	0.42785	0.25808	0.355836	0.327089	0.277856	0.302214	0.261137	0.254115	0.310644	0.38235	0.375429	0.365664	0.260874	0.33712	0.352424	0.343873	0.242474	0.280439	0.22546	0.215067	0.254633	0.241861	0.252296	0.351689	0.240496	0.23047	0.509668	0.38967	0.321558	0.320357	0.380817	0.249755	0.339597	0.255579	0.286768	0.268408	0.281954	0.693147	0.325988	0.417839	0.287388	0.256793	0.27639	0.880222	0.530035	0.441182	0.334061
Abce1	2.36607	2.46489	2.36124	2.54038	2.2073	2.47255	2.45821	2.3704	2.36663	2.62602	2.53857	2.45444	2.46541	2.43865	2.34324	2.42242	2.37447	2.21224	2.48121	2.50723	2.37608	2.17585	2.34773	2.42137	2.19165	2.20726	2.53306	2.19642	2.68667	2.44364	2.51397	2.2846	2.4644	2.37916	2.35078	2.45275	2.30361	2.33047	1.99165	1.99139	2.277	2.42584	2.43681	2.44134	2.20387	2.39294	2.46878	2.43267	2.37114
Abcf1	2.65251	2.63024	2.69013	2.63432	2.57342	2.66723	2.70419	2.6599	2.59863	2.61303	2.68614	2.56771	2.7508	2.67286	2.62624	2.60066	2.67073	2.53944	2.56588	2.64199	2.57643	2.41003	2.60683	2.53822	2.49621	2.6548	2.67047	2.31951	2.51247	2.62306	2.59411	2.65874	2.57297	2.72175	2.65412	2.66412	2.67185	2.46354	2.64931	2.39582	2.67065	2.52771	2.55565	2.60644	2.46192	2.85775	2.85725	2.78021	2.64833
Abcf2	1.8623	1.8907	1.84601	1.58688	1.73263	1.90216	1.88793	1.78905	1.63053	1.73561	1.87238	1.78495	1.83534	1.87556	1.83508	1.59112	1.86067	1.64745	1.79967	1.86532	1.88905	1.68598	1.85907	1.77552	1.82092	1.6359	1.8091	1.5259	1.85642	1.66768	1.84204	1.76617	1.77666	1.90251	1.87366	1.90542	1.92346	1.51503	1.91174	1.8181	1.8552	1.79567	1.85953	1.83856	1.82465	1.81483	1.7294	1.92609	1.83928
Abcf3	0.444226	0.441849	0.470511	0.769938	0.439883	0.633969	0.510964	0.474179	0.565216	0.559148	0.588808	0.605071	0.333497	0.569274	0.508182	0.451438	0.452992	0.549116	0.444869	0.460399	0.384958	0.572023	0.461481	0.578967	0.408077	0.578917	0.68302	0.568775	0.445905	0.510657	0.525169	0.464637	0.560833	0.507358	0.538081	0.480861	0.503673	0.5874	0.475185	0.794513	0.539115	0.571724	0.422196	0.521891	0.430498	0.79304	0.867637	0.664003	0.476822
Abcg1	0.0646426	0.170195	0.174689	0	0.186463	0.105111	0.0806097	0.0997221	0.0801906	0.0223596	0.0383287	0.0815467	0.0315067	0.0756385	0.0713362	0.0455435	0.104454	0.0853104	0.286298	0.188311	0.0872835	0.0385082	0.118244	0.0646937	0.141875	0.060936	0.0407734	0.0231049	0.0281006	0.227625	0.0323469	0.0887953	0.0407734	0.101758	0.118281	0.0577623	0.0651526	0.0713534	0.176559	0.173287	0.0870413	0.0952849	0.157779	0.066014	0.140592	0.397137	0.127791	0.105935	0.0803386
Abcg2	0.767507	0.832047	0.736807	0.806558	0.586617	0.948344	0.898709	0.85393	0.846525	0.771942	0.726979	0.619632	0.804656	0.945942	0.921882	0.70408	0.866585	0.814302	1.03228	0.708344	0.734821	0.723696	0.823457	0.731565	0.884127	0.856055	0.582393	0.480585	0.846081	0.491633	0.727994	0.771226	0.910871	0.897359	0.872663	0.974512	0.81072	0.886162	0.430133	0.621227	0.774757	0.96924	0.96921	0.862609	0.808314	0.785512	0.820672	0.886823	0.69044
Abcg3	0	0	0	0	0	0.00320901	0	0.0123776	0	0	0	0	0	0	0.00525112	0	0.00459038	0	0.00505947	0	0	0	0	0.00924196	0	0	0.00815467	0	0	0	0	0	0	0	0	0	0	0	0	0	0	0	0	0.0110023	0	0	0	0	0.0066014
Abcg4	0	0	0	0	0.00686284	0.00320901	0	0	0.00456018	0	0.0102943	0	0	0	0	0	0.00918076	0	0.00505947	0.00877401	0	0	0.00471529	0	0	0.015234	0.00815467	0.145752	0	0	0.00924196	0	0	0.00894383	0.00234965	0.00577623	0	0.01529	0.0385082	0	0.0140503	0	0	0.0110023	0	0.0424376	0.0797998	0	0.0132028
Abcg5	0	0	0	0	0.00686284	0	0.00315067	0	0	0.0149064	0	0	0	0.00714585	0	0	0	0	0	0	0	0	0	0	0	0	0	0	0	0	0	0	0	0	0	0	0	0	0	0	0	0	0	0	0	0	0	0	0
Abcg8	0	0	0	0	0	0	0.00315067	0	0	0.0074532	0	0	0	0	0	0	0	0	0	0	0	0	0	0	0	0	0	0	0.00936685	0	0	0	0	0	0	0	0	0	0	0	0	0	0	0	0	0	0	0	0
Abhd10	0.374045	0.643328	0.537497	0.423741	0.492061	0.497344	0.466134	0.495193	0.466785	0.423456	0.493042	0.370424	0.421479	0.481212	0.490155	0.442131	0.530166	0.499595	0.391397	0.445001	0.529401	0.490444	0.55276	0.447631	0.426299	0.423403	0.409279	0.263177	0.435498	0.438314	0.433255	0.448674	0.333115	0.472869	0.466705	0.414585	0.445626	0.43121	0.353117	0.722593	0.476057	0.516817	0.490805	0.571763	0.547195	0.472291	0.436691	0.496981	0.478062
Abhd11	0.523768	0.559731	0.451203	0.46995	0.526779	0.57701	0.522244	0.636086	0.500524	0.449737	0.586285	0.674725	0.476487	0.665929	0.562478	0.47046	0.602412	0.423938	0.624357	0.642431	0.531248	0.530243	0.576528	0.4907	0.604206	0.516687	0.411278	0.384969	0.489555	0.760844	0.623243	0.647474	0.407734	0.526765	0.635121	0.608392	0.579531	0.310997	0.606692	0.621227	0.51191	0.530451	0.519802	0.572337	0.497455	0.595351	0.351564	0.571959	0.393473
Abhd12	0.372833	0.370634	0.479869	0.202281	0.372937	0.395621	0.43177	0.430507	0.456399	0.52528	0.424206	0.487748	0.565936	0.462191	0.514626	0.378446	0.410464	0.469034	0.351302	0.435812	0.357382	0.384358	0.522071	0.389038	0.479618	0.560385	0.429586	0.476671	0.508688	0.312538	0.421823	0.416031	0.634525	0.336921	0.420468	0.427119	0.424003	0.360623	0.35897	0.173287	0.404022	0.424795	0.488104	0.484318	0.487392	0.480982	0.417734	0.373605	0.418261
Abhd13	0.159306	0.199887	0.276514	0.271596	0.161344	0.223603	0.206163	0.24553	0.357676	0.308114	0.230555	0.358499	0.20747	0.246602	0.241156	0.22426	0.204317	0.199998	0.172411	0.244934	0.162626	0.219062	0.255072	0.18798	0.145517	0.21457	0.233101	0.268978	0.250609	0.328656	0.263486	0.147166	0.292342	0.188244	0.19405	0.193994	0.212064	0.323697	0.353117	0	0.180358	0.249847	0.248154	0.129331	0.23018	0.289458	0.234523	0.17525	0.274023
Abhd14a	0.809547	0.677399	0.738639	0.560633	0.771085	0.759185	0.761624	0.839832	0.759881	0.790903	0.861918	0.662069	0.776653	0.763929	0.753441	0.720897	0.771065	0.634427	0.790445	0.794121	0.703144	0.73985	0.843037	0.63389	0.581579	0.91138	0.99539	0.296009	0.56521	0.949085	0.595888	0.614546	0.923997	0.862445	0.847903	0.715414	0.833104	0.479462	0.545658	0.794513	0.600221	0.698768	0.792077	0.876304	0.792155	0.733969	0.576107	0.812635	0.977629
Abhd14b	0.0590545	0.0374674	0.0165035	0.0462098	0.0549027	0.0711436	0.0585551	0.0288811	0.0319213	0.138517	0.02402	0.101933	0.0315067	0.0214375	0.0105022	0.0530054	0.0459038	0.0213276	0.0809515	0.026322	0.0496125	0.0537667	0.0424376	0.0369678	0.017548	0.030468	0.186798	0.0308065	0.0187337	0.162977	0.0508308	0.0656666	0.0407734	0.0268315	0.0375944	0.0462098	0.0543438	0.0671228	0.0385082	0	0.0374674	0.0270057	0.0799785	0.0220047	0.0462098	0.0607208	0.0621774	0.0828302	0.0594126
Abhd15	0.00610702	0	0	0	0	0	0.00630134	0	0.0182407	0	0.00343142	0	0	0	0	0.00407734	0.00918076	0.0106638	0.00505947	0.00877401	0	0.00962704	0.00943057	0.00924196	0	0	0.024464	0.0308065	0	0	0.00462098	0.0145926	0	0.00447192	0.0046993	0	0.00316506	0.00509667	0	0	0	0	0.0088865	0	0	0.0212188	0.0293706	0	0.0066014
Abhd16a	0.214095	0.235763	0.243507	0.238901	0.24085	0.257329	0.273398	0.213224	0.286606	0.3181	0.290577	0.248104	0.248192	0.206692	0.283165	0.179789	0.229174	0.293359	0.294698	0.204784	0.230433	0.287364	0.27945	0.332016	0.250145	0.420069	0.309891	0.372308	0.426131	0.241446	0.237248	0.265146	0.251569	0.250091	0.227962	0.243149	0.221078	0.263011	0.237593	0.346574	0.282245	0.185304	0.276323	0.14303	0.223423	0.223398	0.263894	0.0693147	0.359345
Abhd16b	0	0	0	0	0	0	0	0.00412588	0	0.0074532	0	0	0	0	0	0	0	0.0106638	0	0	0	0	0	0	0.00877401	0	0	0	0	0	0.00462098	0	0	0	0.00234965	0	0	0	0	0	0	0	0	0.0110023	0	0.00707293	0	0	0
Abhd17a	1.4144	1.44649	1.43326	1.44875	1.33204	1.43875	1.39094	1.4436	1.43926	1.48323	1.36437	1.18476	1.42435	1.43932	1.41024	1.41779	1.39254	1.4177	1.455	1.30212	1.41331	1.46399	1.41311	1.482	1.47787	1.47015	1.41678	1.50112	1.28307	1.38338	1.24362	1.41031	1.46171	1.47743	1.40422	1.43286	1.45603	1.97409	1.59496	1.24245	1.39869	1.43688	1.33135	1.35136	1.58742	1.66004	1.44746	1.26872	1.41955
Abhd17b	0.589816	0.550364	0.581695	0.989098	0.510205	0.566313	0.521488	0.552334	0.618746	0.896726	0.708635	0.681255	0.619478	0.538507	0.478057	0.565537	0.505046	0.604247	0.596927	0.576884	0.445244	0.604175	0.46132	0.622051	0.544834	0.457754	0.58655	0.835255	0.62389	0.435612	0.53022	0.527276	0.492412	0.496405	0.57768	0.458945	0.536292	0.708771	0.737324	0.274653	0.46757	0.671437	0.512426	0.699225	0.568732	0.79039	0.812082	0.529676	0.605851
Abhd17c	0.433493	0.392704	0.515681	0.358352	0.361421	0.425294	0.419054	0.447394	0.487112	0.377165	0.446421	0.429686	0.492241	0.470563	0.459936	0.354049	0.417124	0.586718	0.355502	0.470844	0.43771	0.389266	0.521986	0.456012	0.335735	0.367632	0.590547	0.181064	0.270934	0.499009	0.386532	0.503467	0.39774	0.542716	0.489983	0.40543	0.422395	0.387838	0.253575	0	0.410213	0.366195	0.447519	0.468355	0.394746	0.791719	0.604507	0.593327	0.431464
[truncated: 19,745 more rows]
[truncated: 29 more columns]

## Sheet: Day 3
Gene	Control	Arid3a	Arnt	Cdx2	Cebpb	Cited1	Cited2	Creb3	Creb3l2	Dlx3	Dlx4	Dlx5	Dnajb6	Dpf1	E2f5	Elf5	Erf	Esrrg	Ets2	Etv4	Fbxl19	Fos	Fosl1	Fosl2	Foxn2	Gata3	Gata4	Gcm1	Gli1	Gsc	Hand1	Hdac1	Hdac2	Hmgn2	Hopx	Id1	Id2	Jun	Maff	Mafk	Max	Med26	Mef2d	Meis1	Mllt1	Nkx2-1	Nkx2-5	Npm1	Otx2
[truncated: 20,186 more rows]
[truncated: 28 more columns]

## Sheet: Day 5
Gene	Control	Arid3a	Arnt	Cited1	Cited2	Creb3	Creb3l2	Dlx3	Dlx4	Dnajb6	Dpf1	E2f5	Elf5	Erf	Esrrg	Ets2	Etv4	Fbxl19	Fos	Fosl1	Fosl2	Foxn2	Gata3	Gata4	Gli1	Hand1	Hdac1	Hdac2	Hmgn2	Hopx	Id1	Id2	Max	Med26	Mef2d	Meis1	Mllt1	Nkx2-5	Npm1	Otx2	Pax9	Pdx1	Pole3	Polr2e	Pou2f1	Psmc3	Rbfox2	Rbpj	Rbpjl
[truncated: 20,392 more rows]
[truncated: 20 more columns]
