# Supplementary material for: Systematic mapping of TF-mediated cell fate changes by a pooled induction coupled with scRNA-seq and multi-omics approaches
Source: Genome Res. 2024 Mar;34(3):484–97. doi: 10.1101/gr.277926.123 (PMC11067882; doi:10.1101/gr.277926.123)
Supplement: Supplement 5 [file Supplemental_Table_S5.xlsx]

## Sheet: Sheet1
Table S5. TFs with cell fate conversion potential
day	TF	adjusted p-value
1	Jun	3.35875e-46
1	Gcm1	1.15582e-38
1	Nkx2-5	9.30215e-37
1	Pax9	1.87762e-36
1	Elf5	4.84901e-34
1	Pdx1	8.85298e-32
1	Nkx2-1	2.57122e-31
1	Dlx3	6.00697e-29
1	Dlx4	8.82231e-26
1	Fos	3.17965e-25
1	Gata4	3.72104e-25
1	Tbx5	9.92511e-25
1	Otx2	2.04965e-22
1	Gata3	4.50061e-21
1	Yy1	2.72485e-17
1	Creb3l2	2.72485e-17
1	Etv4	1.57373e-15
1	Gli1	6.58523e-15
1	Dlx5	1.85738e-14
1	Cdx2	1.18792e-13
1	Tgif1	1.54686e-12
1	Tfap2c	2.2958e-11
1	Ets2	7.58775e-11
1	Fosl1	7.51485e-09
1	Rbfox2	3.46939e-08
1	Gsc	6.16125e-06
1	Fosl2	3.90316e-05
1	Esrrg	0.000115095
1	Cebpb	0.00209768
3	Otx2	1.06267e-24
3	Dlx4	3.24675e-23
3	Tbx5	1.47266e-21
3	Pdx1	6.38304e-13
3	Gata3	1.08248e-11
3	Jun	8.26523e-11
3	Fosl1	1.61704e-10
3	Elf5	2.33237e-09
3	Dlx3	6.67726e-09
3	Fos	2.48094e-08
3	Tgif1	2.48094e-08
3	Nkx2-1	5.49201e-07
3	Pax9	7.06099e-07
3	Gli1	8.75658e-07
3	Nkx2-5	2.42926e-06
3	Fosl2	3.69528e-05
3	Gata4	4.17298e-05
3	Dlx5	6.05651e-05
3	Etv4	0.000133556
3	Gcm1	0.00248081
5	Dlx4	7.13362e-43
5	Fosl1	5.18701e-30
5	Tbx5	2.17569e-22
5	Otx2	1.2557e-12
5	Tgif1	2.67175e-11
5	Elf5	1.37855e-08
5	Esrrg	4.5153e-08
5	Vgll3	1.45415e-07
5	Fosl2	1.71483e-07
5	Snai1	5.28743e-07
5	Med26	2.61728e-06
5	Cited1	7.65905e-06
5	Dlx3	1.2307e-05
5	Gli1	3.52541e-05
5	Tbx20	0.000548055
5	Arid3a	0.00197775
5	Gata3	0.00290897
5	Etv4	0.00402339
5	Fos	0.0053526
5	Gata4	0.00558841
5	Pdx1	0.00558841
