# Supplementary material for: Systematic mapping of TF-mediated cell fate changes by a pooled induction coupled with scRNA-seq and multi-omics approaches
Source: Genome Res. 2024 Mar;34(3):484–97. doi: 10.1101/gr.277926.123 (PMC11067882; doi:10.1101/gr.277926.123)
Supplement: Supplement 6 [file Supplemental_Table_S6.xlsx]

## Sheet: Day 1
Table S6. iTF-mediated lineage specification
ID (643)	Creb3l2	Gata3	Gata4	Elf5	Etv4	Ets2	Cdx2	Dlx3	Dlx5	Dlx4	Pdx1	Nkx2-1	Nkx2-5	Otx2	Gcm1	Pax9	Fosl1	Fosl2	Fos	Jun	Tbx5	Gsc	Tfap2c	Tsc22d3	Esrrg	Pou2f1	Gli1	Hand1	Rbfox2	Mafk	Maff	Control	Hdac2	Arid3a	Med26	Rbpj	Rybp	Foxn2	Arnt	Dpf1	Trim25	Dnajb6	E2f5	Id1	Hdac1	Cited2	Creb3	Hopx	Id2
DESCARTES_FETAL_EYE_PHOTORECEPTOR_CELLS	-0.19	-0.17	-0.25	-0.37	-0.55	-0.37	-0.51	0.66	1.82	-0.24	-0.29	-0.5	-0.3	-0.21	-0.26	-0.37	-0.39	-0.52	-0.52	-0.54	-0.22	-0.52	-0.04	-0.32	-0.47	-0.32	-0.35	-0.42	-0.52	0.7	-0.09	-0.53	-0.03	-0.27	-0.5	-0.36	-0.29	-0.34	-0.43	-0.49	-0.53	-0.33	-0.26	-0.44	-0.31	-0.37	-0.27	-0.34	-0.35
DESCARTES_FETAL_PANCREAS_STROMAL_CELLS	0	-0.36	-0.18	0.17	-0.32	-0.01	-0.59	0.11	1.37	-0.32	-0.21	0.5	1.11	-0.08	1.09	-0.08	-0.15	-0.15	-0.12	-0.03	-0.27	-0.15	2.62	-0.19	-0.18	-0.52	0.04	-0.25	0.02	-0.31	0.3	-0.32	-0.13	-0.39	0.02	-0.3	0.08	-0.54	-0.19	-0.18	-0.07	-0.06	-0.15	-0.13	-0.08	-0.15	-0.06	-0.21	-0.2
DESCARTES_FETAL_LIVER_HEMATOPOIETIC_STEM_CELLS	-0.18	-0.37	-0.28	-0.38	-0.38	-0.41	4.2	-0.07	-0.26	-0.33	-0.3	0.39	0.07	-0.25	-0.2	-0.01	-0.39	-0.44	-0.38	-0.37	-0.31	-0.17	-0.09	-0.37	-0.16	-0.4	-0.33	-0.35	-0.37	-0.53	-0.09	-0.37	-0.43	-0.13	-0.38	-0.38	-0.32	-0.39	-0.39	-0.21	-0.37	-0.25	-0.34	-0.42	-0.4	-0.38	-0.31	-0.33	-0.39
GAO_LARGE_INTESTINE_24W_C8_GOBLET_CELL	-0.1	-0.17	-0.4	-0.3	-0.38	-0.37	4.04	0.65	-0.34	-0.1	0.74	0.84	0.41	-0.04	1.19	0.06	-0.28	-0.26	-0.19	1.36	-0.17	0.05	0.27	-0.32	-0.11	-0.32	0.36	-0.3	-0.43	-0.26	-0.32	-0.28	-0.56	-0.49	-0.38	-0.27	-0.42	-0.25	-0.4	-0.42	-0.37	-0.49	-0.35	-0.39	-0.29	-0.36	-0.32	-0.31	-0.27
DESCARTES_FETAL_HEART_ERYTHROBLASTS	-0.03	-0.1	0.05	0.36	0.2	-0.1	4.14	2.14	2.19	0.63	2.03	0.66	1.05	0.48	1.66	0.38	-0.21	-0.32	0.27	1.03	0.01	0	0.2	-0.46	-0.08	-0.33	-0.32	-0.34	0.11	-0.13	-0.03	-0.26	-0.43	-0.44	-0.34	-0.37	-0.37	-0.44	-0.29	-0.32	-0.33	-0.36	-0.32	-0.3	-0.48	-0.26	-0.33	-0.33	-0.36
DESCARTES_MAIN_FETAL_BIPOLAR_CELLS	-0.1	-0.24	-0.29	-0.23	0.03	0.06	1.75	1.07	1.5	0.45	1.35	0.33	0.66	-0.17	0.93	0.12	-0.29	-0.31	-0.25	-0.05	-0.32	-0.27	0	-0.21	-0.2	-0.32	-0.29	-0.36	-0.46	-0.02	-0.3	-0.35	-0.45	-0.27	-0.26	-0.38	-0.29	-0.19	-0.34	-0.29	-0.23	-0.26	-0.28	-0.23	-0.28	-0.29	-0.31	-0.25	-0.3
DESCARTES_MAIN_FETAL_URETERIC_BUD_CELLS	-0.3	0.77	0.22	0.55	-0.49	-0.47	2.66	0.31	0.69	0.53	0.42	-0.47	-0.1	-0.49	1.43	0.54	-0.19	-0.29	0.24	0.74	-0.32	-0.06	-0.08	-0.51	-0.55	-0.46	-0.62	-0.55	-0.39	-0.45	-0.25	-0.48	0.09	-0.51	-0.49	-0.52	-0.59	-0.52	-0.12	-0.53	-0.56	-0.39	-0.48	-0.67	-0.57	-0.55	-0.52	-0.46	-0.48
HAY_BONE_MARROW_FOLLICULAR_B_CELL	0.06	-0.08	-0.07	2.13	0.34	0.18	3.77	0.73	1.11	0.41	0.61	0.92	0.32	0.1	2.89	1.04	-0.14	-0.06	0.09	1.66	0.76	0.11	0.7	-0.09	-0.09	0.1	-0.23	-0.24	-0.23	0.33	-0.22	-0.34	-0.16	-0.28	-0.2	-0.16	-0.25	-0.29	-0.24	-0.14	-0.15	-0.15	-0.22	-0.25	-0.26	-0.09	-0.3	-0.29	-0.33
GAO_SMALL_INTESTINE_24W_C9_ENTEROENDOCRINE_CELL	-0.02	-0.3	-0.28	0.56	-0.05	-0.25	0.72	0.1	0.08	-0.21	0.79	0.14	-0.06	-0.24	1.11	-0.06	-0.37	-0.38	-0.17	-0.09	-0.3	0	0	-0.17	0.09	-0.38	-0.39	-0.37	-0.43	-0.5	-0.4	-0.33	-0.38	-0.25	-0.13	-0.32	-0.4	-0.35	-0.33	-0.38	-0.35	-0.42	-0.39	-0.21	-0.31	-0.39	-0.3	-0.37	-0.33
DESCARTES_FETAL_CEREBELLUM_SLC24A4_PEX5L_POSITIVE_CELLS	-0.31	-0.39	0.13	0.61	-0.39	-0.37	-0.31	0.89	0.32	0.12	0.82	0.2	0.67	0.31	1.08	1.94	-0.31	-0.4	-0.32	-0.34	-0.41	-0.27	-0.32	-0.34	-0.27	-0.38	-0.36	-0.33	-0.42	-0.08	-0.27	-0.42	-0.51	-0.26	-0.4	-0.26	-0.35	-0.36	-0.19	-0.33	-0.36	-0.32	-0.36	-0.34	-0.34	-0.35	-0.33	-0.34	-0.37
AIZARANI_LIVER_C12_NK_NKT_CELLS_4	-0.32	-0.23	-0.21	2.71	0.45	-0.15	0.33	-0.11	-0.22	-0.23	-0.12	-0.02	-0.02	-0.23	1.68	0.24	-0.27	-0.4	-0.27	-0.02	-0.26	-0.32	1.74	-0.16	-0.49	-0.33	-0.3	-0.45	-0.26	-0.54	-0.25	-0.3	-0.47	-0.33	-0.46	-0.45	-0.31	-0.29	-0.26	-0.28	-0.3	-0.42	-0.21	-0.39	-0.36	-0.43	-0.3	-0.31	-0.35
DURANTE_ADULT_OLFACTORY_NEUROEPITHELIUM_CD8_T_CELLS	-0.08	0.16	-0.28	2.99	0.61	0.81	-0.08	-0.18	0.04	-0.26	0.21	0.77	0.45	0.05	1.76	1.29	-0.16	-0.33	1.25	0.88	0.35	0.61	4.47	0	-0.33	-0.26	0.25	-0.04	-0.21	-0.09	-0.23	-0.28	-0.22	-0.15	-0.25	-0.26	-0.22	-0.17	-0.13	-0.25	-0.31	-0.41	-0.26	-0.3	-0.33	-0.29	-0.38	-0.34	-0.28
AIZARANI_LIVER_C5_NK_NKT_CELLS_3	-0.39	0.18	0.86	2.37	0.29	-0.18	0.73	0.22	-0.06	-0.17	1.02	1.5	0.58	-0.16	3.69	0.38	-0.48	-0.46	-0.14	0.92	-0.19	0.85	1.35	-0.28	-0.51	-0.41	0.21	-0.5	-0.3	-0.21	-0.41	-0.35	-0.46	-0.48	-0.43	-0.52	-0.37	-0.39	-0.34	-0.39	-0.41	-0.4	-0.35	-0.5	-0.44	-0.51	-0.37	-0.38	-0.44
DESCARTES_FETAL_ADRENAL_LYMPHOID_CELLS	-0.07	-0.17	-0.19	2.54	0.61	0.08	-0.4	-0.27	-0.29	-0.08	-0.17	1.66	0.45	-0.1	2.59	0.67	-0.34	-0.42	-0.13	1	-0.16	1.2	0.9	-0.33	-0.03	-0.29	-0.44	-0.22	-0.31	-0.09	-0.31	-0.34	-0.35	-0.39	-0.29	-0.4	-0.35	-0.39	-0.45	-0.37	-0.23	-0.38	-0.38	-0.39	-0.36	-0.31	-0.36	-0.4	-0.32
DESCARTES_FETAL_KIDNEY_LYMPHOID_CELLS	-0.02	-0.21	-0.25	2.57	0.64	-0.04	0	0.1	0.48	0.04	0.25	1.65	0.76	0.02	3.84	0.7	-0.23	-0.13	0.45	0.74	0.02	1.31	0.83	-0.28	0.26	-0.29	-0.28	-0.2	-0.22	0.81	0.02	-0.32	-0.38	-0.36	-0.37	-0.38	-0.34	-0.37	-0.31	-0.39	-0.33	-0.37	-0.33	-0.39	-0.37	-0.3	-0.29	-0.34	-0.29
DESCARTES_FETAL_EYE_GANGLION_CELLS	-0.22	-0.42	-0.17	2.56	0.62	-0.31	0.08	0.64	0.24	0.44	0.41	0.22	0.67	0.01	3.56	-0.06	-0.23	-0.21	-0.2	0.29	-0.22	-0.28	-0.28	-0.17	-0.11	-0.38	-0.26	-0.27	-0.11	-0.3	-0.13	-0.34	0.06	-0.28	-0.32	-0.34	-0.22	-0.4	-0.35	-0.31	-0.21	-0.36	-0.19	-0.32	-0.41	-0.28	-0.36	-0.31	-0.35
DESCARTES_FETAL_INTESTINE_LYMPHOID_CELLS	-0.21	-0.41	-0.45	2.43	0.42	-0.12	-0.14	-0.36	-0.39	-0.17	-0.15	0.69	0.45	-0.05	2.88	0.12	-0.33	-0.34	-0.36	-0.22	-0.06	-0.07	-0.22	-0.19	-0.21	-0.25	-0.23	-0.23	-0.34	-0.39	-0.33	-0.33	-0.38	0.01	-0.26	-0.43	-0.34	-0.31	-0.29	-0.33	0.02	-0.16	-0.22	-0.33	-0.35	-0.26	-0.29	-0.3	-0.24
DESCARTES_FETAL_LIVER_LYMPHOID_CELLS	-0.17	-0.12	-0.23	2.97	0.58	0.15	-0.42	0.17	0.06	-0.27	0.03	0.76	-0.03	0.05	3.1	0.1	-0.33	-0.42	-0.26	0.1	-0.14	-0.19	0	-0.26	0.03	-0.3	-0.16	-0.31	-0.13	-0.15	-0.48	-0.33	-0.3	-0.33	-0.28	-0.42	-0.21	-0.31	-0.13	-0.26	-0.2	-0.3	-0.3	-0.34	-0.33	-0.34	-0.24	-0.33	-0.22
DESCARTES_FETAL_SPLEEN_LYMPHOID_CELLS	-0.19	-0.4	-0.2	2.89	0.52	0.06	0	0.22	0.57	0.3	0.22	0.61	-0.19	0.33	3.41	0.43	-0.33	-0.26	-0.13	0.17	0.05	0.12	0.06	-0.39	-0.18	-0.12	-0.13	-0.35	-0.38	-0.22	-0.12	-0.36	-0.21	-0.05	-0.16	-0.3	-0.3	-0.29	-0.13	-0.35	-0.33	-0.37	-0.22	-0.35	-0.38	-0.32	-0.26	-0.28	-0.3
DESCARTES_FETAL_PLACENTA_LYMPHOID_CELLS	-0.13	-0.36	-0.18	3.6	0.51	0.18	-0.1	0.13	0.33	-0.16	-0.02	0.59	0.25	0.16	2.32	0.78	-0.07	-0.11	0.12	0.25	-0.16	0.04	0.02	-0.24	-0.15	-0.25	0.28	-0.27	-0.28	0.18	0.24	-0.3	-0.12	-0.19	-0.07	-0.18	-0.13	-0.23	-0.14	-0.29	-0.2	-0.11	-0.21	-0.29	-0.37	-0.15	-0.2	-0.27	-0.24
DESCARTES_FETAL_STOMACH_PARIETAL_AND_CHIEF_CELLS	-0.15	-0.16	0.42	1.24	0.57	0.08	0.35	0.05	0.55	-0.04	-0.11	0.56	0.4	0	0.78	0.55	-0.31	-0.25	-0.24	0.28	-0.23	0.07	0.39	0	-0.07	-0.29	0.15	-0.14	-0.1	0.39	-0.08	-0.32	-0.36	-0.27	0.02	-0.22	-0.28	-0.39	-0.32	-0.34	-0.24	-0.43	-0.33	-0.31	-0.31	-0.26	-0.28	-0.33	-0.24
DESCARTES_MAIN_FETAL_UNIPOLAR_BRUSH_CELLS	-0.32	-0.34	-0.26	1.87	0.53	-0.27	0.2	0.3	0.13	-0.41	-0.09	0.26	0.17	-0.13	0.66	-0.21	-0.3	-0.46	-0.33	-0.16	-0.34	-0.18	-0.09	-0.39	-0.22	-0.38	-0.27	-0.42	-0.44	-0.19	-0.32	-0.39	-0.23	-0.41	-0.34	-0.4	-0.33	-0.3	-0.33	-0.43	-0.39	-0.43	-0.42	-0.38	-0.41	-0.37	-0.32	-0.41	-0.42
DURANTE_ADULT_OLFACTORY_NEUROEPITHELIUM_B_CELLS	-0.08	-0.05	-0.39	1.34	0.23	0.8	-0.06	0.08	0.14	0.09	0.45	0.9	0.78	0.27	2.02	1.65	-0.04	-0.08	0.18	0.31	0.06	0.52	0.11	0.17	0.49	0.07	-0.13	0.11	-0.22	1.19	0.29	-0.3	-0.32	-0.11	-0.04	-0.1	-0.13	-0.1	-0.2	-0.2	0.14	-0.13	0	0	-0.22	0.05	-0.04	-0.03	0.05
DURANTE_ADULT_OLFACTORY_NEUROEPITHELIUM_CD4_T_CELLS	-0.27	-0.37	-0.39	1.15	0.38	0.6	-0.15	-0.11	-0.33	-0.35	0.02	-0.1	-0.16	-0.14	0.76	0.27	-0.25	-0.15	0.28	-0.26	-0.05	0.93	-0.02	-0.15	-0.2	-0.34	0.01	-0.07	0.05	-0.25	-0.15	-0.34	-0.08	-0.13	0.03	-0.08	-0.24	-0.39	0.21	-0.28	-0.02	-0.23	-0.31	-0.28	-0.3	-0.11	-0.15	-0.15	-0.07
DESCARTES_FETAL_KIDNEY_MYELOID_CELLS	-0.01	-0.06	0.22	0.63	0.01	0.13	0.75	1.65	1.88	0.17	0.2	1.63	0.97	-0.1	0.93	0.71	0.23	0.12	2.68	2.24	0.06	-0.08	0.19	-0.03	-0.35	-0.19	-0.12	-0.23	-0.01	0.27	-0.02	-0.29	-0.49	-0.32	-0.21	-0.22	-0.28	-0.2	-0.24	-0.25	-0.21	-0.39	-0.22	-0.33	-0.31	-0.06	-0.31	-0.26	-0.34
DESCARTES_FETAL_HEART_MYELOID_CELLS	-0.06	-0.1	-0.18	-0.23	-0.22	-0.09	1.67	2.11	3.57	0.56	0.73	0.55	0.71	0.79	0.61	0.07	0.6	0.32	3.7	2.85	-0.26	0.05	0.52	0.37	0.09	-0.18	-0.16	-0.28	0.03	0.39	0.04	-0.33	-0.58	-0.25	-0.21	-0.13	-0.28	-0.05	-0.25	-0.26	-0.17	-0.24	-0.29	-0.31	-0.39	-0.01	-0.22	-0.35	-0.32
DESCARTES_FETAL_ADRENAL_MYELOID_CELLS	-0.07	0.14	0.26	0.38	-0.08	-0.02	2	2.07	3.6	0.5	0.42	0.62	1.33	-0.06	0.46	0.29	0.83	0.74	5.42	2.84	0.18	-0.13	0.54	0.16	-0.05	-0.23	0.09	-0.11	0.09	-0.13	0.23	-0.32	-0.55	-0.29	-0.09	-0.11	-0.35	-0.31	-0.26	-0.13	-0.19	-0.38	-0.32	-0.26	-0.46	-0.11	-0.24	-0.37	-0.29
DESCARTES_FETAL_MUSCLE_MYELOID_CELLS	-0.14	-0.01	0.3	0.61	-0.13	-0.01	2.56	2.22	4.15	0.73	0.52	0.62	1.58	-0.01	0.66	0.3	0.59	0.4	4.62	2.67	-0.12	0.17	0.62	0.17	0.14	-0.18	-0.29	-0.2	-0.21	0.51	0.16	-0.28	-0.27	-0.13	-0.15	-0.14	-0.45	-0.2	-0.23	-0.15	-0.17	-0.21	-0.19	-0.27	-0.31	-0.13	-0.33	-0.31	-0.38
VANGURP_PANCREATIC_GAMMA_CELL	-0.09	-0.43	-0.29	0.75	-0.1	-0.36	1.25	1.99	3.06	0.24	0.83	-0.18	0.86	-0.41	1.47	-0.21	1.16	0.9	4.01	2.83	0.2	-0.13	-0.37	-0.19	-0.51	-0.38	-0.51	-0.13	-0.19	-0.32	-0.32	-0.28	-0.35	-0.29	-0.51	-0.39	-0.36	-0.26	-0.13	-0.27	-0.28	-0.51	-0.33	-0.28	-0.2	-0.36	-0.18	-0.32	-0.25
DESCARTES_MAIN_FETAL_MESOTHELIAL_CELLS	-0.33	-0.43	-0.34	-0.45	-0.41	-0.51	1.19	0.2	0.69	-0.33	-0.17	-0.32	-0.3	-0.19	-0.17	0.65	0.84	0.37	5.83	2.28	-0.43	-0.43	-0.22	-0.4	-0.39	-0.39	-0.39	-0.28	-0.35	0.03	0.01	-0.3	-0.45	-0.51	-0.38	-0.32	-0.35	-0.33	-0.26	-0.37	-0.19	-0.41	-0.31	-0.42	-0.35	-0.39	-0.38	-0.41	-0.41
BUSSLINGER_GASTRIC_REG3A_POSITIVE_CELLS	0.23	-0.09	-0.06	-0.25	-0.3	-0.33	0.71	-0.09	0	0.15	0.25	0.24	0.72	-0.12	0.24	1.93	-0.42	-0.32	-0.19	0.5	0.38	0.83	0.28	0.22	-0.42	-0.46	-0.1	-0.51	0.46	-0.17	0.25	-0.31	-0.4	-0.36	-0.35	-0.45	-0.46	-0.37	-0.3	-0.28	-0.17	-0.34	-0.32	-0.4	-0.29	-0.46	-0.23	-0.26	-0.36
GAO_SMALL_INTESTINE_24W_C3_ENTEROCYTE_PROGENITOR_SUBTYPE_1	0.54	0.14	0.17	0	-0.1	-0.11	0.73	1.23	0.91	0.01	0.88	0.7	1.44	0.24	0.91	1.77	-0.3	-0.35	0.38	1.19	0.61	0.85	0.76	-0.5	0.08	-0.2	0.23	-0.41	-0.14	-0.52	0.12	-0.26	-0.45	-0.25	-0.14	-0.29	-0.34	-0.29	-0.29	-0.36	-0.48	-0.42	-0.4	-0.33	-0.36	-0.2	-0.33	-0.33	-0.45
DESCARTES_MAIN_FETAL_ADRENOCORTICAL_CELLS	-0.01	-0.15	-0.35	0.39	-0.23	-0.16	0.14	0.25	-0.23	0.09	0.24	0.15	0.36	-0.01	0.55	0.66	0.08	-0.15	0.75	0.71	-0.14	0.16	0.01	0.25	0.15	-0.31	0.18	-0.18	-0.14	0.41	0.08	-0.23	-0.22	-0.2	-0.17	-0.24	-0.28	-0.05	-0.17	-0.17	-0.21	-0.02	-0.23	-0.39	-0.27	-0.28	-0.32	-0.24	-0.29
DESCARTES_MAIN_FETAL_INTESTINAL_EPITHELIAL_CELLS	-0.15	0.64	0.62	-0.39	-0.34	-0.17	0.55	-0.05	-0.4	0.37	0.8	0.3	-0.27	0.19	1.38	1.05	-0.24	-0.34	0.14	1.72	-0.24	0.17	-0.07	-0.33	0.19	-0.25	-0.32	-0.38	0.31	1.28	-0.15	-0.3	-0.19	-0.01	-0.03	-0.25	-0.35	-0.25	-0.29	-0.48	-0.27	-0.56	-0.26	-0.37	-0.34	-0.1	-0.27	-0.22	-0.33
GAUTAM_EYE_CHOROID_SCLERA_ACTIVATED_T_CELLS	-0.14	-0.23	-0.14	0.08	-0.05	-0.15	0.32	0.16	0.06	-0.23	0.09	-0.05	0.07	0.36	0.52	0.67	-0.36	-0.33	-0.3	0.5	0.06	0.22	-0.24	-0.06	-0.34	-0.35	-0.3	-0.27	0.19	0.29	-0.19	-0.24	-0.31	-0.32	-0.31	-0.38	-0.3	-0.26	-0.3	-0.29	-0.27	-0.48	-0.33	-0.31	-0.32	-0.28	-0.29	-0.33	-0.3
DESCARTES_FETAL_ADRENAL_SLC26A4_PAEP_POSITIVE_CELLS	-0.19	-0.29	-0.28	-0.12	-0.14	-0.24	0.15	0.26	0.92	-0.09	-0.03	-0.3	-0.26	-0.21	1.02	-0.14	-0.28	-0.29	-0.33	0.02	-0.01	-0.18	-0.09	-0.1	-0.17	-0.3	-0.24	-0.03	-0.07	-0.2	-0.23	-0.25	-0.17	-0.29	-0.29	-0.33	-0.26	-0.23	0	-0.03	-0.11	-0.14	-0.07	-0.11	-0.17	-0.09	-0.28	-0.17	-0.21
DESCARTES_FETAL_CEREBRUM_SKOR2_NPSR1_POSITIVE_CELLS	-0.38	0.01	0.75	-0.32	-0.29	-0.2	0.53	2.44	1.2	1.08	2.19	0.46	1.31	0.91	0.62	0.6	-0.47	-0.48	-0.33	0.27	-0.13	0	-0.19	-0.31	-0.38	-0.2	-0.11	-0.2	-0.48	-0.32	-0.25	-0.34	-0.37	-0.47	-0.38	-0.41	-0.28	-0.31	-0.38	-0.34	-0.45	-0.26	-0.36	-0.37	-0.36	-0.24	-0.38	-0.31	-0.39
DESCARTES_FETAL_HEART_STROMAL_CELLS	-0.3	0.67	2.42	-0.14	-0.47	-0.22	0.51	2.91	2.04	1.71	1.68	0.44	1.17	0	1.73	0.02	-0.12	-0.25	-0.03	-0.09	-0.17	-0.55	2.11	-0.47	-0.36	-0.49	-0.26	-0.5	-0.31	-0.46	-0.25	-0.34	-0.47	-0.49	-0.27	-0.41	-0.42	-0.48	-0.35	-0.44	-0.45	-0.51	-0.33	-0.5	-0.42	-0.33	-0.44	-0.35	-0.38
DESCARTES_FETAL_CEREBELLUM_OLIGODENDROCYTES	-0.22	0.22	2.35	-0.08	-0.23	-0.39	-0.23	2.23	2.15	1.41	0.69	0.46	0.25	-0.17	1.76	0.11	-0.35	-0.38	-0.26	0.01	-0.01	-0.09	0.73	-0.12	-0.07	-0.39	-0.3	-0.37	-0.33	0.12	-0.23	-0.38	-0.48	-0.34	-0.39	-0.29	-0.34	-0.2	-0.35	-0.25	-0.29	-0.42	-0.3	-0.37	-0.31	-0.37	-0.39	-0.38	-0.43
DESCARTES_FETAL_CEREBRUM_OLIGODENDROCYTES	-0.16	0.5	2.6	-0.31	-0.33	-0.46	-0.43	1.56	1.77	0.81	0.56	0.39	0.5	0.09	1.86	0.06	-0.22	-0.32	0.15	0.04	-0.13	-0.34	-0.04	-0.19	-0.18	-0.26	-0.13	-0.48	-0.44	-0.07	-0.04	-0.34	-0.5	-0.38	-0.34	-0.23	-0.22	-0.32	-0.4	-0.25	-0.35	-0.19	-0.39	-0.49	-0.41	-0.32	-0.4	-0.44	-0.45
DESCARTES_MAIN_FETAL_OLIGODENDROCYTES	-0.19	0.28	2.67	0	-0.19	-0.35	-0.09	2.48	2.32	0.88	0.44	0.11	0.08	-0.31	1.01	-0.01	-0.46	-0.45	-0.48	0.31	-0.47	-0.27	-0.02	-0.26	-0.31	-0.34	-0.2	-0.33	-0.35	-0.48	-0.25	-0.31	-0.46	-0.42	-0.28	-0.23	-0.24	-0.21	-0.36	-0.39	-0.39	-0.46	-0.33	-0.42	-0.4	-0.34	-0.37	-0.36	-0.35
DESCARTES_FETAL_CEREBELLUM_PURKINJE_NEURONS	-0.17	2	1.79	-0.02	-0.05	-0.1	0.56	2.72	2.18	1.18	2.4	1.22	1.2	0.52	-0.05	0.01	-0.29	-0.28	0.24	0.75	-0.37	-0.01	0.59	-0.1	-0.07	0.06	0.13	-0.2	-0.31	-0.11	-0.04	-0.32	-0.22	-0.33	-0.29	-0.28	-0.15	-0.13	-0.25	-0.17	-0.16	-0.3	-0.27	-0.29	-0.28	-0.15	-0.22	-0.26	-0.33
GAO_SMALL_INTESTINE_24W_C7_SECRETORY_PROGENITOR	-0.28	2.28	2.81	-0.36	-0.33	-0.37	0.24	2.06	3.15	0.29	1.91	0.82	1.56	0.33	1.84	0.14	-0.28	-0.22	-0.18	0.12	-0.31	-0.08	0.06	-0.29	-0.01	-0.27	-0.16	-0.32	-0.39	-0.36	-0.28	-0.32	-0.29	-0.28	-0.25	-0.34	-0.32	-0.32	-0.26	-0.25	-0.3	-0.27	-0.33	-0.26	-0.34	-0.32	-0.33	-0.31	-0.28
DESCARTES_FETAL_INTESTINE_STROMAL_CELLS	-0.33	0.79	2.67	0.44	-0.37	-0.25	4.17	1.98	2.67	0.97	0.97	3.22	0.79	-0.34	3.12	-0.13	-0.3	-0.34	0.24	0.36	-0.04	0.13	0.63	-0.28	-0.08	-0.29	0.19	-0.44	-0.29	-0.57	-0.22	-0.31	-0.31	-0.35	-0.27	-0.24	-0.25	-0.26	-0.27	-0.32	-0.32	-0.33	-0.29	-0.34	-0.28	-0.35	-0.34	-0.3	-0.31
DESCARTES_FETAL_STOMACH_MESOTHELIAL_CELLS	-0.26	0.98	2.29	-0.39	-0.4	-0.34	1.96	1	0.56	-0.03	0.41	0.95	1.15	0.4	1.12	-0.01	-0.17	-0.15	-0.15	-0.02	-0.08	0.28	-0.02	-0.4	-0.06	-0.24	-0.42	-0.36	-0.21	-0.42	0	-0.4	-0.47	-0.26	-0.23	-0.29	-0.33	-0.38	-0.37	-0.2	-0.15	-0.39	-0.34	-0.42	-0.24	-0.31	-0.32	-0.31	-0.38
DESCARTES_FETAL_HEART_MEGAKARYOCYTES	-0.27	-0.21	-0.32	0.12	-0.16	0.03	-0.34	1.07	0.46	-0.14	-0.05	-0.19	0.11	0.28	1.01	-0.25	-0.29	-0.28	0.08	-0.2	-0.35	0.09	-0.04	-0.37	-0.3	-0.3	-0.27	-0.43	-0.28	-0.33	-0.29	-0.32	-0.45	-0.32	-0.2	-0.29	-0.34	-0.32	-0.31	-0.36	-0.36	-0.36	-0.34	-0.36	-0.37	-0.4	-0.28	-0.39	-0.39
DESCARTES_FETAL_INTESTINE_ENS_GLIA	-0.23	0.12	0.16	-0.13	-0.38	-0.22	-0.26	5.41	3.49	-0.19	1.84	0.77	0.3	-0.08	3.92	0.31	-0.18	-0.31	-0.15	0.1	-0.12	0	1.64	-0.39	-0.47	-0.41	-0.06	-0.38	-0.25	0.31	-0.13	-0.27	-0.45	-0.32	-0.39	-0.27	-0.34	-0.28	-0.45	-0.45	-0.32	-0.35	-0.41	-0.31	-0.34	-0.28	-0.36	-0.39	-0.41
DESCARTES_FETAL_LUNG_CILIATED_EPITHELIAL_CELLS	0.14	0	0.19	0.01	-0.31	-0.26	-0.3	5.18	5.18	0.12	0.8	0.59	0.45	0.03	4.23	0.47	-0.21	-0.35	-0.33	-0.08	-0.25	-0.11	0.71	-0.24	-0.04	-0.05	-0.29	-0.29	-0.03	0.16	-0.06	-0.27	-0.39	-0.26	-0.21	-0.22	-0.39	-0.24	-0.05	-0.19	-0.19	-0.32	-0.21	-0.26	-0.19	-0.22	-0.07	-0.19	-0.17
DESCARTES_FETAL_KIDNEY_METANEPHRIC_CELLS	-0.32	1.02	1.88	0	-0.32	-0.42	0.47	4.11	5.35	1.01	1.03	0.21	1.04	1.13	3.88	1.23	-0.25	-0.3	0.01	1.61	0.13	-0.27	-0.17	-0.19	-0.03	-0.17	-0.29	-0.3	-0.24	-0.18	-0.2	-0.29	-0.42	-0.46	-0.44	-0.29	-0.25	-0.36	-0.32	-0.38	-0.2	-0.39	-0.32	-0.34	-0.37	-0.31	-0.29	-0.33	-0.34
DESCARTES_MAIN_FETAL_CLC_IL5RA_POSITIVE_CELLS	-0.01	-0.03	0.19	-0.2	-0.13	-0.13	0.4	2.88	4.19	0.65	1.12	0.77	0.9	0.14	2.72	0.45	-0.18	-0.33	0.03	0.51	-0.21	0.1	0.28	-0.28	-0.21	-0.28	-0.07	-0.16	0.04	0.17	-0.04	-0.27	-0.18	-0.33	-0.1	-0.23	-0.11	-0.12	-0.22	-0.33	-0.18	-0.11	-0.06	-0.32	-0.28	-0.14	-0.22	-0.2	-0.31
DESCARTES_MAIN_FETAL_NEUROENDOCRINE_CELLS	-0.27	0.19	-0.17	-0.35	-0.18	-0.36	-0.37	1.14	2.9	0.37	-0.18	0.22	0.41	-0.36	1.79	0.04	-0.31	-0.33	-0.24	0.12	-0.39	-0.17	-0.11	-0.16	-0.27	-0.36	-0.32	-0.42	-0.32	0.32	-0.15	-0.35	-0.37	-0.29	-0.32	-0.35	-0.28	-0.27	-0.31	-0.3	-0.24	-0.29	-0.38	-0.37	-0.4	-0.34	-0.37	-0.34	-0.38
DESCARTES_FETAL_CEREBRUM_INHIBITORY_NEURONS	-0.35	-0.37	-0.3	-0.32	-0.31	-0.37	1.09	3.28	4.13	1.04	1.26	0.7	1.01	0.47	5.77	0.48	-0.38	-0.39	-0.36	-0.36	-0.35	-0.36	-0.37	-0.41	-0.38	-0.33	-0.36	-0.39	-0.39	0.84	0.1	-0.4	-0.39	-0.39	-0.38	-0.38	-0.34	-0.4	-0.35	-0.37	-0.36	-0.33	-0.37	-0.39	-0.37	-0.36	-0.37	-0.38	-0.38
DESCARTES_MAIN_FETAL_INHIBITORY_INTERNEURONS	-0.37	-0.59	-0.55	-0.5	-0.53	-0.22	0.19	0.86	1.87	-0.07	0.46	-0.26	-0.21	0.07	2.13	0.25	-0.57	-0.54	-0.5	-0.37	-0.44	-0.5	-0.33	-0.48	-0.42	-0.46	-0.58	-0.52	-0.61	0.23	-0.43	-0.46	-0.51	-0.49	-0.6	-0.54	-0.45	-0.52	-0.52	-0.45	-0.53	-0.5	-0.51	-0.5	-0.54	-0.54	-0.54	-0.53	-0.57
DESCARTES_MAIN_FETAL_SCHWANN_CELLS	-0.24	-0.31	-0.38	-0.22	-0.32	-0.39	0.5	1.47	1.38	0.13	0.34	-0.21	0.16	0.12	2.14	1.07	-0.36	-0.41	-0.02	0.4	-0.35	0.09	-0.11	-0.12	-0.18	-0.34	-0.11	-0.21	-0.19	1.1	0.13	-0.24	-0.36	-0.41	-0.43	-0.37	-0.34	-0.29	-0.23	-0.18	-0.26	-0.26	-0.28	-0.26	-0.36	-0.22	-0.27	-0.35	-0.3
DESCARTES_FETAL_LUNG_STROMAL_CELLS	-0.18	0.75	2.05	-0.2	-0.38	-0.22	0.1	1.23	1.29	0.57	0.37	-0.06	-0.24	-0.03	2.79	0.04	-0.23	-0.41	0.21	-0.22	-0.28	0.77	0.2	-0.48	-0.2	-0.24	-0.26	-0.46	-0.43	0.25	0.11	-0.45	-0.51	-0.34	-0.48	-0.44	-0.2	-0.42	-0.48	-0.46	-0.45	-0.47	-0.41	-0.44	-0.47	-0.36	-0.47	-0.43	-0.42
DESCARTES_FETAL_PANCREAS_MYELOID_CELLS	-0.21	0.22	1.27	-0.3	-0.34	-0.19	0	1.47	1.93	0.29	1.14	0.01	0.02	-0.08	2.63	1.21	-0.23	-0.17	-0.25	0.32	0.49	0.02	0.15	-0.27	-0.37	-0.28	-0.21	-0.29	-0.31	-0.04	-0.21	-0.37	-0.27	-0.31	-0.15	-0.24	-0.34	-0.29	-0.19	-0.38	-0.23	-0.13	-0.29	-0.36	-0.3	-0.16	-0.27	-0.37	-0.33
DESCARTES_FETAL_MUSCLE_STROMAL_CELLS	0.9	0.69	2.37	0.37	-0.14	-0.29	0.38	2.48	2.23	1.56	1.15	0.93	0.61	0.06	6.32	1.36	-0.05	-0.11	1.16	0.17	0.14	-0.14	0.25	-0.28	-0.14	-0.35	0.54	-0.28	-0.13	-0.24	-0.35	-0.31	-0.42	-0.47	-0.33	-0.41	-0.24	-0.39	-0.31	-0.25	-0.42	-0.35	-0.27	-0.39	-0.44	-0.29	-0.39	-0.35	-0.35
DESCARTES_FETAL_STOMACH_STROMAL_CELLS	0.04	0.59	2.36	0.88	-0.37	-0.16	0.46	1.66	1.94	0.74	1.23	1.12	1.2	-0.05	5.1	0.8	-0.22	-0.27	-0.02	0.26	-0.11	0.19	1.89	-0.38	-0.35	-0.29	0.75	-0.39	-0.31	-0.1	0.1	-0.38	-0.36	-0.29	-0.19	-0.19	-0.22	-0.22	-0.45	-0.31	-0.33	-0.27	-0.23	-0.36	-0.27	-0.22	-0.29	-0.36	-0.37
DESCARTES_MAIN_FETAL_AMACRINE_CELLS	0.5	0.39	1.13	-0.16	-0.03	-0.3	0.45	1.06	1.82	-0.1	0.26	1.29	1.54	-0.01	3.33	-0.24	-0.32	-0.31	-0.37	0.03	-0.3	-0.22	0.14	-0.26	-0.06	-0.31	-0.1	-0.3	-0.27	0.02	0.05	-0.31	-0.19	-0.23	-0.17	-0.28	-0.15	-0.31	-0.42	-0.25	-0.28	-0.33	-0.33	-0.32	-0.29	-0.34	-0.25	-0.28	-0.26
DESCARTES_FETAL_INTESTINE_SMOOTH_MUSCLE_CELLS	-0.34	0.06	-0.12	0.21	-0.29	-0.15	1.48	1.11	1.85	0.21	1.19	0.86	0.63	-0.18	1.62	0.63	-0.31	-0.19	0.59	1.41	0.1	0.34	0.72	-0.24	-0.33	-0.32	1.32	-0.43	0.33	0.74	0.31	-0.34	-0.16	-0.46	-0.16	-0.3	-0.38	-0.39	-0.35	-0.34	-0.13	0	-0.23	-0.37	-0.32	-0.4	-0.39	-0.42	-0.43
HAY_BONE_MARROW_CD34_POS_MULTILIN	0.01	-0.15	0.25	-0.07	0.29	0.07	1.03	1.84	1.3	0.42	0.61	0.34	0.53	0.29	1.62	0.97	-0.05	-0.11	0.04	1.13	-0.35	-0.16	-0.06	-0.25	-0.32	-0.34	0.4	-0.28	-0.38	0.01	0.11	-0.33	-0.27	-0.25	-0.13	-0.12	-0.18	-0.33	-0.28	-0.37	-0.21	-0.2	-0.14	-0.41	-0.25	-0.32	-0.3	-0.3	-0.31
DESCARTES_FETAL_LUNG_NEUROENDOCRINE_CELLS	-0.18	0.04	-0.22	0.13	0.04	0.3	0.17	1.33	4.13	0.63	0.64	0.32	1.39	-0.15	1.76	-0.01	-0.16	-0.28	0.71	2.17	-0.5	-0.22	1.18	-0.11	-0.27	-0.41	-0.23	-0.49	-0.28	0.5	-0.06	-0.3	-0.29	-0.48	-0.3	-0.25	-0.3	-0.34	-0.42	-0.36	-0.29	-0.36	-0.26	-0.31	-0.24	-0.35	-0.36	-0.38	-0.4
DESCARTES_FETAL_EYE_SMOOTH_MUSCLE_CELLS	0.01	-0.1	-0.1	0.36	0	-0.18	0.81	0.99	2.73	-0.06	0.08	1.66	0.96	-0.06	1.29	0.28	-0.34	-0.39	-0.27	1.33	-0.12	0.22	-0.02	-0.23	0.4	-0.16	-0.25	-0.32	0.29	0.2	-0.29	-0.27	-0.36	-0.2	-0.37	-0.34	-0.22	-0.27	-0.37	-0.22	-0.28	-0.17	-0.33	-0.3	-0.39	-0.28	-0.25	-0.34	-0.25
DESCARTES_MAIN_FETAL_MICROGLIA	-0.31	0.69	1.22	0.56	-0.2	-0.24	1.03	1.31	2.56	0.47	1.19	1.3	2.38	-0.09	1.49	0.81	-0.33	-0.36	-0.17	0.81	-0.13	0.02	1.01	-0.16	-0.2	-0.33	0.07	-0.3	0.01	-0.3	-0.24	-0.35	-0.38	-0.37	-0.4	-0.27	-0.42	-0.48	-0.36	-0.37	-0.41	-0.48	-0.38	-0.4	-0.39	-0.34	-0.35	-0.39	-0.38
LAKE_ADULT_KIDNEY_C29_UNKNOWN_NOVEL_PT_CFH_POS_SUBPOPULATION_S2	-0.19	-0.23	-0.24	0.19	-0.22	-0.25	1.15	2.44	3.5	1.07	1	1.28	2.46	0.14	1.54	0.29	-0.28	-0.3	0.18	1.64	-0.24	-0.09	0.96	-0.27	-0.27	-0.4	-0.24	-0.27	-0.09	-0.2	-0.2	-0.37	-0.34	-0.43	-0.23	-0.35	-0.25	-0.36	-0.37	-0.37	-0.35	-0.37	-0.34	-0.32	-0.41	-0.33	-0.3	-0.37	-0.41
DESCARTES_MAIN_FETAL_PDE11A_FAM19A2_POSITIVE_CELLS	0.04	-0.46	-0.51	-0.13	0.1	-0.01	1.03	1.9	1.75	0.19	1.48	0.43	0.81	-0.31	1.7	0.48	-0.51	-0.49	-0.55	1.85	-0.35	0.39	0.46	-0.19	0.22	-0.12	-0.52	-0.31	-0.11	0.89	0.26	-0.38	-0.26	-0.22	-0.35	-0.12	-0.28	-0.28	-0.39	-0.49	-0.28	-0.28	-0.18	-0.35	-0.31	-0.35	-0.29	-0.37	-0.35
DESCARTES_FETAL_PANCREAS_ENS_GLIA	-0.14	0.25	0.14	0.12	-0.21	-0.28	0.98	2.16	3.35	0.9	3.03	1.17	1.89	0.66	2.19	1.17	-0.29	-0.47	0.14	3.21	0.08	0.04	1.6	-0.08	-0.31	-0.24	-0.02	-0.42	-0.07	0.78	-0.23	-0.22	-0.63	-0.27	-0.47	-0.32	-0.42	-0.38	-0.58	-0.36	0.05	-0.31	-0.41	-0.29	-0.37	-0.32	-0.38	-0.36	-0.36
DESCARTES_MAIN_FETAL_ERYTHROBLASTS	-0.04	0.02	0.46	0.62	0.5	0.05	1.47	2.19	3.91	0.64	1.56	1.46	1.3	0.54	4.38	1.19	-0.2	-0.07	0.27	3.07	0.69	1.02	1.55	-0.49	0.88	0.1	0.66	-0.24	0.07	0.11	-0.07	-0.27	-0.22	-0.32	-0.27	-0.31	-0.2	-0.37	-0.37	-0.38	-0.43	-0.37	-0.36	-0.36	-0.4	-0.26	-0.35	-0.31	-0.41
FAN_EMBRYONIC_CTX_MICROGLIA_1	-0.09	-0.03	0.04	0.5	0.23	0.1	0.79	1.15	2.19	0.33	1.57	0.62	0.98	0.1	1.44	0.68	-0.18	-0.05	-0.05	1.25	-0.21	0.39	1.23	-0.28	0.26	0.07	0.19	-0.19	-0.13	0.39	0.09	-0.26	0.09	-0.23	-0.1	0	-0.18	-0.23	-0.12	-0.34	-0.32	-0.2	-0.23	-0.23	-0.22	-0.08	-0.22	-0.2	-0.25
ZHONG_PFC_C1_MICROGLIA	0.2	0.15	0.27	0.72	0.58	0.67	0.68	2.08	3.52	0.65	2.1	0.96	1.22	0.32	2.98	1.15	-0.08	0.07	0.62	2.53	0.35	0.48	1.71	-0.08	0.37	0.16	0.63	-0.05	-0.09	1.47	0.1	-0.14	0.19	0	-0.04	-0.12	-0.16	-0.29	-0.05	-0.3	-0.11	-0.11	-0.2	-0.19	-0.22	0.18	-0.12	-0.04	-0.13
GAO_ESOPHAGUS_25W_C4_FGFR1HIGH_EPITHELIAL_CELLS	0.8	-0.03	-0.03	0.12	0.38	0.11	0.02	2.47	2.51	0.26	1.27	1.31	1.54	0.13	3.27	0.76	-0.16	-0.21	0.44	2.38	0.1	0.11	0.14	-0.28	-0.06	-0.37	0	-0.29	-0.22	-0.34	-0.38	-0.33	-0.45	-0.36	-0.38	-0.43	-0.39	-0.45	-0.39	-0.34	-0.29	-0.37	-0.4	-0.4	-0.42	-0.35	-0.37	-0.44	-0.4
GAUTAM_EYE_IRIS_CILIARY_BODY_SMOOTH_MUSCLE_CELLS	-0.09	0.44	1.08	0.17	0.12	-0.04	1.27	3.38	3.33	0.23	2.06	0.96	1.59	0.09	2.88	1.21	-0.38	-0.29	0.28	2.07	0.43	0.37	-0.02	-0.21	1.1	0.12	0.05	-0.44	-0.01	0.17	-0.34	-0.27	-0.59	-0.5	-0.28	-0.42	-0.47	-0.48	-0.21	-0.39	-0.44	-0.48	-0.29	-0.4	-0.36	-0.33	-0.35	-0.34	-0.42
DESCARTES_MAIN_FETAL_ENS_NEURONS	-0.1	-0.06	0.11	-0.1	-0.25	-0.24	1.26	1.17	2.69	0.77	0.53	0.66	0.56	-0.15	0.96	0.7	-0.28	-0.37	-0.34	0.82	-0.24	-0.13	-0.34	-0.25	0.02	-0.06	-0.37	-0.27	-0.37	0.64	-0.41	-0.34	-0.23	-0.1	-0.23	-0.31	-0.16	-0.25	-0.19	-0.21	-0.18	-0.27	-0.18	-0.2	-0.25	-0.18	-0.3	-0.28	-0.28
DESCARTES_MAIN_FETAL_RETINAL_PROGENITORS_AND_MULLER_GLIA	-0.27	-0.2	-0.35	-0.2	-0.32	-0.17	0.22	1.29	2.92	0.21	0.63	0.1	0.29	0.26	0.62	0.37	-0.38	-0.39	-0.32	0.61	-0.37	-0.23	-0.13	-0.19	-0.49	-0.35	-0.18	-0.36	-0.31	0.12	-0.32	-0.28	-0.14	-0.36	-0.3	-0.29	-0.36	-0.33	-0.19	-0.4	-0.28	-0.32	-0.33	-0.27	-0.27	-0.32	-0.38	-0.4	-0.41
HU_FETAL_RETINA_AMACRINE	0.64	0.54	-0.04	0.11	0.11	-0.09	1.17	1.95	4.71	1.19	1.33	0.67	2.57	0.06	1.85	1.53	0.08	0.27	0.47	1.15	0.5	0.21	-0.2	-0.38	-0.23	-0.47	0.07	-0.34	0.47	-0.54	-0.38	-0.26	-0.26	-0.24	-0.39	-0.38	-0.35	-0.28	-0.24	-0.19	-0.1	-0.43	-0.34	-0.34	-0.26	-0.11	-0.01	-0.15	-0.26
DESCARTES_FETAL_EYE_MICROGLIA	-0.17	2.36	2.5	0.84	0.13	0.05	0.66	2.81	4.01	0.82	0.77	0.65	0.38	0.03	1.38	0.55	-0.15	-0.13	0.12	2.75	0.4	0.28	2.56	-0.02	-0.28	-0.17	0.19	-0.13	-0.1	0.09	0.32	-0.28	-0.52	-0.29	-0.2	-0.25	-0.32	-0.17	-0.3	-0.24	-0.22	-0.39	-0.29	-0.28	-0.35	-0.07	-0.25	-0.33	-0.26
GAO_LARGE_INTESTINE_24W_C2_MKI67POS_PROGENITOR	-0.33	0.54	1.06	0.74	0.5	0.5	0.97	1.71	2.69	0.52	1.07	0.19	0.92	-0.01	1.31	0.46	-0.32	-0.34	-0.05	1.31	0.03	0.19	1.14	-0.39	0.07	-0.2	0.18	-0.28	-0.24	0.14	-0.28	-0.39	-0.27	-0.36	-0.28	-0.29	-0.35	-0.35	-0.25	-0.42	-0.34	-0.42	-0.36	-0.41	-0.39	-0.31	-0.27	-0.37	-0.37
HU_FETAL_RETINA_RPC	0.06	0.64	1.75	0.16	-0.05	-0.06	2.38	2.18	2.91	0.8	0.95	0.32	0.19	1.4	2.48	0.41	-0.23	-0.41	0.37	1.03	0.37	0.47	1.38	0.02	0.07	0.26	1.44	0.15	0.09	0.41	0.03	-0.31	-0.09	-0.34	-0.37	-0.32	-0.35	-0.36	-0.33	-0.47	-0.4	-0.34	-0.34	-0.47	-0.39	-0.38	-0.3	-0.27	-0.41
HU_FETAL_RETINA_MULLER	0.11	0.19	0.91	0.1	0.03	1.11	0.81	1.63	3.37	0.35	2.73	1.7	0.15	0.82	1.51	0.09	-0.14	-0.18	1.27	1.54	1.07	0.51	2.26	0.18	-0.01	-0.2	1.96	0.49	0.37	-0.17	-0.14	-0.32	-0.31	-0.37	-0.29	-0.37	-0.48	-0.36	-0.4	-0.29	-0.38	-0.5	-0.36	-0.45	-0.49	-0.29	-0.36	-0.35	-0.51
MENON_FETAL_KIDNEY_1_EMBRYONIC_RED_BLOOD_CELLS	0.06	0.31	0.05	0.09	0.09	0.07	1.75	1.21	1.85	0.15	0.78	0.16	0.12	0.41	2.86	0.69	-0.17	-0.27	-0.11	1.07	-0.07	0.04	0.42	0.05	-0.28	-0.17	0.23	-0.39	0.47	0.89	0.51	-0.2	-0.07	-0.33	-0.3	-0.16	-0.2	-0.13	-0.06	-0.14	-0.22	-0.39	-0.18	-0.19	-0.21	-0.16	-0.13	-0.19	-0.18
ZHONG_PFC_C3_UNKNOWN_INP	-0.1	0.23	0.38	0.11	-0.09	-0.11	0.95	0.47	1.28	0.16	1.24	0.27	0.36	0.25	1.46	0.54	-0.21	-0.18	-0.13	0.79	-0.09	0.28	0.72	-0.3	0.19	0.15	0.37	-0.24	-0.18	0.6	-0.21	-0.3	0.01	-0.27	-0.16	0.03	-0.05	-0.14	0.06	-0.34	-0.19	-0.14	-0.21	-0.21	0.04	-0.06	-0.09	-0.22	-0.17
DESCARTES_FETAL_HEART_SMOOTH_MUSCLE_CELLS	-0.21	-0.23	-0.41	-0.32	-0.39	-0.25	-0.37	-0.27	-0.32	-0.4	-0.24	0.55	0.61	0.19	5.22	0.53	-0.26	-0.29	-0.28	2.66	-0.51	0.56	0.49	-0.4	-0.06	-0.33	-0.11	-0.18	-0.18	0.6	-0.05	-0.34	0.16	-0.2	-0.24	-0.23	-0.14	-0.21	-0.17	-0.31	-0.21	-0.06	-0.21	-0.2	-0.22	-0.24	-0.3	-0.31	-0.34
DESCARTES_FETAL_INTESTINE_MYELOID_CELLS	-0.08	0.11	0.22	-0.02	-0.08	-0.09	-0.22	0.05	0.22	-0.05	0.21	1.73	2.65	0.92	4.62	0.88	-0.08	-0.14	0.21	3.78	-0.21	-0.12	-0.16	-0.34	-0.3	-0.31	-0.08	-0.25	-0.29	-0.06	-0.09	-0.3	-0.33	-0.28	-0.26	-0.23	-0.28	-0.18	-0.26	-0.23	-0.22	-0.29	-0.27	-0.36	-0.35	-0.11	-0.19	-0.35	-0.35
DESCARTES_FETAL_PANCREAS_LYMPHOID_CELLS	-0.28	-0.42	-0.4	2.25	0.51	-0.03	-0.41	-0.13	0.06	-0.1	0.04	1.34	0.37	0.22	3.29	0.47	-0.16	-0.28	-0.04	4.01	-0.01	-0.22	0.18	-0.19	-0.13	-0.2	-0.15	-0.35	-0.38	-0.24	-0.16	-0.29	-0.39	-0.19	-0.12	-0.39	-0.14	-0.28	-0.16	-0.32	-0.15	-0.27	-0.23	-0.27	-0.19	-0.2	-0.19	-0.29	-0.23
AIZARANI_LIVER_C22_RESIDENT_B_CELLS_2	1.43	0.03	0.5	-0.12	-0.01	-0.13	0.65	-0.01	0.14	-0.24	0.56	0.52	0.08	-0.01	3.26	1.12	-0.3	-0.24	-0.3	0.91	-0.19	0.07	0.07	-0.22	-0.34	-0.14	-0.27	-0.21	-0.08	0.4	-0.12	-0.29	-0.49	-0.36	-0.31	-0.4	-0.29	-0.21	-0.27	-0.2	-0.23	-0.41	-0.24	-0.4	-0.23	-0.32	-0.23	-0.29	-0.34
AIZARANI_LIVER_C8_RESIDENT_B_CELLS_1	2.03	0.05	0.78	-0.29	0.08	-0.1	0.62	0.26	0.58	-0.12	0.99	1.11	0.35	0.04	3.48	1.48	-0.32	-0.28	-0.25	1.76	-0.3	0.31	0.21	-0.28	-0.24	-0.09	-0.24	0.01	-0.06	0.41	-0.17	-0.3	-0.45	-0.34	-0.27	-0.24	-0.31	-0.34	-0.24	-0.25	-0.17	-0.45	-0.22	-0.36	-0.25	-0.32	-0.13	-0.33	-0.38
AIZARANI_LIVER_C38_RESIDENT_B_CELLS_3	2.03	0.19	0.79	-0.25	-0.1	-0.11	0.78	0.29	0.58	-0.12	0.88	0.57	0.17	0.17	2.8	1.64	-0.31	-0.36	-0.32	0.86	-0.23	0.43	0.17	-0.21	-0.15	-0.09	-0.07	-0.1	-0.04	0.31	0.09	-0.25	-0.58	-0.33	-0.25	-0.33	-0.34	-0.39	-0.09	-0.15	0	-0.31	-0.16	-0.43	-0.21	-0.32	-0.13	-0.3	-0.33
BUSSLINGER_GASTRIC_NECK_CELLS	1.91	0.2	1.11	-0.17	-0.31	-0.28	0.1	0.18	0.52	-0.1	1.31	1.97	2.57	0.41	3.63	2.41	-0.28	-0.26	0.71	0.97	0.74	0.45	0.7	-0.28	-0.22	-0.41	-0.05	-0.35	0.01	0.48	-0.19	-0.31	-0.26	-0.37	-0.3	-0.3	-0.37	-0.37	-0.44	-0.24	-0.26	-0.51	-0.34	-0.37	-0.39	-0.38	-0.28	-0.37	-0.36
BUSSLINGER_GASTRIC_CHIEF_CELLS	0.07	0.15	0.63	0.23	0.22	-0.15	0.09	0.34	0.05	-0.17	-0.1	0.37	0.83	0.41	2.94	0.85	-0.41	-0.31	-0.05	0.65	-0.14	1.47	0.49	-0.03	0.83	-0.34	-0.15	-0.38	0.12	-0.17	-0.09	-0.3	-0.75	-0.58	-0.52	-0.35	-0.3	-0.43	-0.48	-0.41	-0.38	-0.43	-0.45	-0.53	-0.53	-0.44	-0.41	-0.51	-0.55
BUSSLINGER_GASTRIC_PREZYMOGENIC_CELLS	0.53	0.1	0.21	-0.11	-0.14	-0.19	0.37	0.22	0.48	-0.19	0.2	0.35	1.25	0.07	4.89	1.22	-0.36	-0.33	-0.09	1.08	0.03	2.04	0.22	-0.28	-0.25	-0.28	-0.19	-0.37	-0.03	0.4	-0.13	-0.31	-0.27	-0.45	-0.38	-0.15	-0.26	-0.42	-0.35	-0.26	-0.28	-0.47	-0.36	-0.43	-0.36	-0.24	-0.36	-0.36	-0.4
CUI_DEVELOPING_HEART_5TH_WEEK_ATRIAL_CARDIOMYOCYTE	0.08	0.03	0.57	0.27	0.38	0	0.4	0.24	0.76	0.3	0.25	0.55	1.03	0.14	3.81	2.21	-0.29	-0.31	1.96	1.56	1.22	2.75	2.29	-0.18	0.33	-0.14	-0.22	-0.27	-0.12	-0.31	-0.13	-0.31	-0.47	-0.35	-0.34	-0.37	-0.22	-0.31	-0.35	-0.35	-0.39	-0.43	-0.35	-0.42	-0.43	-0.33	-0.39	-0.37	-0.4
HAY_BONE_MARROW_EOSINOPHIL	0.31	-0.25	0.23	0.03	-0.15	-0.4	-0.26	0.29	0.39	-0.06	0.09	0.25	-0.05	-0.19	4.17	1.73	-0.13	-0.18	0.44	1.54	0.17	2.05	2.92	-0.08	-0.22	-0.17	-0.2	-0.45	-0.03	-0.18	-0.07	-0.27	-0.52	-0.44	-0.5	-0.32	-0.37	-0.31	-0.47	-0.35	-0.25	-0.52	-0.31	-0.41	-0.4	-0.32	-0.33	-0.4	-0.45
DESCARTES_MAIN_FETAL_AFP_ALB_POSITIVE_CELLS	-0.13	-0.35	-0.01	-0.27	-0.23	-0.24	-0.09	0.35	0.28	0.05	-0.03	0.11	0.54	0.01	0.94	0.51	-0.34	-0.41	0.04	0.12	-0.17	0.52	0.51	-0.12	0.96	-0.31	0.15	-0.33	0.18	-0.46	-0.13	-0.32	-0.57	-0.57	-0.35	-0.4	-0.47	-0.39	-0.39	-0.49	-0.29	-0.43	-0.43	-0.41	-0.52	-0.38	-0.46	-0.42	-0.4
DESCARTES_FETAL_HEART_ELF3_AGBL2_POSITIVE_CELLS	-0.01	0.37	0.14	-0.28	-0.07	-0.29	-0.44	-0.03	-0.05	-0.17	-0.22	0.01	0.32	-0.14	2.34	0.28	-0.17	-0.09	0.57	-0.2	-0.31	0.4	0.75	-0.25	-0.06	-0.27	1.09	-0.13	-0.19	-0.08	-0.08	-0.42	0.02	-0.21	-0.33	-0.24	-0.2	-0.47	-0.09	-0.22	-0.33	-0.31	-0.32	-0.33	-0.29	-0.08	-0.24	-0.29	-0.28
DESCARTES_FETAL_PANCREAS_CCL19_CCL21_POSITIVE_CELLS	-0.2	-0.39	-0.32	0.45	-0.22	-0.17	2.52	0.19	-0.03	-0.16	0.36	0.49	0.69	-0.08	3.14	0.63	-0.36	-0.43	-0.01	1	-0.11	0.72	0.66	1.39	0.17	-0.34	-0.16	-0.4	-0.12	1.1	-0.01	-0.26	-0.34	-0.21	-0.34	-0.24	-0.38	-0.37	-0.38	-0.35	-0.33	-0.42	-0.43	-0.39	-0.39	-0.47	-0.36	-0.41	-0.4
DESCARTES_FETAL_HEART_LYMPHATIC_ENDOTHELIAL_CELLS	-0.31	0.25	0.49	-0.16	0.07	-0.07	1.85	-0.18	-0.12	-0.3	0.1	0.35	0.82	0.1	3.52	0.96	-0.2	-0.36	-0.25	1.01	-0.05	-0.02	0.34	-0.18	-0.19	-0.31	-0.18	-0.34	-0.36	0.23	0.08	-0.32	-0.41	-0.4	-0.2	-0.36	-0.17	-0.24	-0.34	-0.37	-0.34	-0.21	-0.32	-0.31	-0.35	-0.23	-0.34	-0.39	-0.34
DESCARTES_MAIN_FETAL_METANEPHRIC_CELLS	-0.33	-0.18	0.9	-0.43	-0.21	-0.34	4.6	0.65	0.78	-0.36	0	0.82	2.15	-0.25	7.14	0.35	-0.31	-0.32	-0.31	0.09	-0.21	0.28	-0.33	-0.41	0.39	-0.33	0.37	-0.24	-0.29	-0.23	-0.11	-0.35	-0.37	-0.37	-0.4	-0.37	-0.43	-0.43	-0.19	-0.31	-0.38	-0.32	-0.4	-0.39	-0.33	-0.36	-0.32	-0.4	-0.38
DESCARTES_FETAL_CEREBELLUM_ASTROCYTES	-0.18	0.33	0.56	0.23	-0.14	-0.31	3.18	0.39	0.11	-0.06	2.44	2.67	1.07	-0.09	4.14	0.49	-0.39	-0.43	0.4	0.87	1.64	-0.33	0.74	-0.18	-0.33	-0.44	0.38	-0.42	-0.44	0.13	-0.29	-0.39	-0.3	-0.41	-0.39	-0.44	-0.29	-0.44	-0.43	-0.24	-0.28	-0.45	-0.35	-0.45	-0.41	-0.45	-0.42	-0.44	-0.47
DESCARTES_FETAL_SPLEEN_MYELOID_CELLS	-0.09	-0.11	0.34	0.11	-0.22	-0.2	1.39	0.58	1.05	0.12	1.5	2.34	0.66	-0.04	4.77	0.31	-0.19	-0.12	0.15	1.55	1.92	0.33	1.13	-0.31	-0.22	0.1	-0.11	-0.28	-0.06	0.59	0.24	-0.27	-0.15	-0.26	-0.26	-0.21	-0.32	-0.25	-0.31	-0.32	-0.17	-0.22	-0.27	-0.35	-0.42	-0.08	-0.15	-0.28	-0.37
DESCARTES_FETAL_MUSCLE_SATELLITE_CELLS	-0.29	-0.12	-0.13	-0.25	-0.24	0	2.59	1.05	1.3	0.25	1.27	2.91	1.5	-0.09	6.11	0.52	-0.39	-0.24	-0.03	0.9	-0.02	0.55	0.99	-0.4	-0.37	-0.27	-0.24	-0.41	-0.46	0.52	-0.29	-0.39	-0.29	-0.31	-0.33	-0.43	-0.27	-0.39	-0.42	-0.37	-0.29	-0.45	-0.4	-0.42	-0.36	-0.43	-0.4	-0.44	-0.44
DESCARTES_FETAL_STOMACH_ENS_NEURONS	-0.04	-0.43	-0.31	0.76	0.24	-0.16	1.61	0.65	0.67	0.46	1.55	2.67	0.9	-0.2	5.93	0.3	-0.05	-0.18	-0.18	0.51	-0.49	-0.4	-0.2	-0.4	0.45	-0.42	-0.46	-0.3	-0.11	0.2	-0.36	-0.24	-0.09	-0.33	-0.45	-0.42	-0.42	-0.25	-0.15	-0.29	-0.03	-0.34	-0.17	-0.16	-0.15	0.06	0	-0.13	-0.12
MURARO_PANCREAS_EPSILON_CELL	-0.23	-0.15	-0.23	0.69	-0.25	-0.15	1.72	2.54	0.89	0.15	1.32	1.21	1.12	0.06	4.16	0.06	-0.16	-0.13	0.64	-0.09	0.4	0.03	1.54	-0.25	-0.37	-0.32	0.63	-0.46	-0.17	-0.04	-0.37	-0.34	-0.02	-0.17	-0.36	-0.19	-0.3	-0.46	-0.14	-0.02	-0.14	-0.31	-0.16	-0.29	-0.29	-0.37	-0.22	-0.39	-0.4
DESCARTES_FETAL_HEART_SCHWANN_CELLS	-0.1	-0.06	-0.24	-0.46	-0.31	-0.12	-0.11	0.42	-0.15	-0.24	1.18	0.4	0.81	-0.36	2.92	-0.07	0.11	-0.12	0.24	-0.11	-0.18	0.13	0.17	-0.14	-0.28	-0.37	-0.32	-0.49	0.09	0.7	0.24	-0.31	-0.25	-0.34	-0.31	-0.27	-0.33	-0.4	-0.23	-0.35	-0.29	-0.25	-0.2	-0.23	-0.22	-0.19	-0.24	-0.28	-0.23
DESCARTES_FETAL_ADRENAL_SCHWANN_CELLS	-0.05	0.27	0.2	-0.19	-0.28	-0.27	-0.2	0.89	0.98	0.98	0.77	1.48	1.61	1.37	6.75	4.77	-0.09	-0.35	0.31	0.99	-0.04	0.4	0.64	-0.16	0.38	-0.4	0.35	-0.3	-0.25	0.2	-0.07	-0.22	-0.37	-0.38	-0.34	-0.23	-0.32	-0.32	-0.45	-0.33	-0.12	-0.43	-0.25	-0.28	-0.39	-0.29	-0.43	-0.34	-0.37
DESCARTES_MAIN_FETAL_CARDIOMYOCYTES	0.11	-0.5	-0.25	-0.45	-0.23	-0.4	-0.28	0.18	0.26	-0.06	-0.17	0.5	0.36	-0.29	1.86	0.45	-0.36	-0.51	-0.54	-0.36	-0.28	-0.25	0.18	-0.28	0.02	-0.39	-0.47	-0.21	-0.39	-0.66	-0.27	-0.49	-0.31	-0.3	-0.27	-0.36	-0.22	-0.31	-0.38	-0.17	-0.15	-0.21	-0.26	-0.21	-0.43	-0.31	-0.23	-0.31	-0.26
DESCARTES_FETAL_STOMACH_VASCULAR_ENDOTHELIAL_CELLS	-0.17	-0.44	-0.16	-0.1	0.78	0.23	-0.06	0.22	1.59	-0.09	1.8	0.76	0.84	0.02	4.01	-0.18	-0.42	-0.45	-0.33	0.43	0.47	-0.11	-0.04	-0.25	0.03	-0.16	-0.17	-0.17	-0.63	0.16	-0.37	-0.32	-0.27	-0.38	-0.15	-0.17	-0.34	-0.34	-0.46	-0.09	-0.23	-0.28	-0.3	-0.27	-0.2	0.03	-0.23	-0.26	-0.24
DESCARTES_FETAL_PANCREAS_ACINAR_CELLS	-0.18	0.44	0.08	-0.06	-0.33	-0.38	-0.4	1.59	0.61	-0.14	-0.27	-0.02	-0.09	-0.27	4.03	0.21	-0.25	-0.35	-0.06	-0.05	-0.34	0.15	1.32	-0.24	-0.04	-0.16	-0.32	-0.33	-0.37	-0.2	-0.12	-0.25	-0.3	-0.19	-0.37	-0.33	-0.24	-0.41	-0.31	-0.26	0	-0.25	-0.35	-0.37	-0.11	-0.37	-0.2	-0.29	-0.32
DESCARTES_MAIN_FETAL_ACINAR_CELLS	-0.17	0.62	0.36	-0.34	-0.3	-0.37	-0.36	0.11	-0.02	-0.14	-0.31	0.59	0.89	0.01	3.95	0.31	-0.31	-0.4	-0.35	-0.31	-0.12	-0.08	2.12	-0.21	-0.25	-0.23	-0.31	-0.34	-0.26	-0.35	-0.2	-0.3	-0.27	-0.25	-0.23	-0.24	-0.28	-0.28	-0.41	-0.2	-0.23	-0.4	-0.29	-0.39	-0.25	-0.3	-0.23	-0.29	-0.27
DESCARTES_FETAL_CEREBELLUM_INHIBITORY_INTERNEURONS	-0.3	-0.37	-0.37	-0.32	-0.39	-0.34	-0.24	-0.29	-0.3	-0.32	0.13	3.51	1.3	1.19	7.44	0.87	-0.35	-0.35	-0.36	-0.3	0.16	-0.34	-0.15	-0.34	-0.18	-0.14	-0.35	-0.32	-0.32	-0.45	-0.28	-0.38	-0.37	-0.02	-0.37	-0.35	-0.29	-0.34	-0.25	-0.32	-0.35	-0.19	-0.28	-0.34	-0.33	-0.34	-0.35	-0.35	-0.34
DESCARTES_FETAL_HEART_LYMPHOID_CELLS	-0.19	-0.4	-0.42	0.26	-0.18	-0.04	-0.55	-0.24	-0.15	-0.03	-0.14	0.94	0.5	-0.17	3.81	0.27	-0.05	-0.1	-0.08	0.3	-0.18	0.15	-0.17	-0.05	-0.13	-0.22	-0.39	-0.25	-0.29	-0.1	0.04	-0.34	-0.45	-0.11	-0.17	-0.4	-0.12	-0.17	-0.33	-0.2	0.04	-0.13	-0.12	-0.15	-0.24	-0.12	-0.15	-0.15	-0.15
DESCARTES_FETAL_LUNG_LYMPHOID_CELLS	-0.1	-0.43	-0.41	0.91	0.2	0.41	-0.35	-0.23	-0.45	-0.07	-0.28	1.41	1.42	-0.14	5.19	0.76	-0.01	0.04	-0.03	0.01	0.24	0.08	-0.09	-0.1	-0.03	-0.15	-0.35	-0.12	-0.36	0.22	-0.14	-0.33	-0.15	0.06	-0.07	-0.28	-0.15	-0.28	-0.2	-0.17	0.19	-0.06	-0.06	-0.24	-0.11	-0.18	-0.1	-0.15	0.06
DESCARTES_FETAL_STOMACH_LYMPHOID_CELLS	-0.19	-0.16	-0.16	1.97	0.91	1.16	-0.26	0.3	0.67	0.45	0.78	1.88	0.93	1.21	7.75	1.5	-0.04	-0.35	0.16	0.49	0.59	1.82	2.26	-0.15	0.23	0.02	0.51	-0.01	-0.2	-0.12	-0.09	-0.25	-0.05	0.6	0.41	-0.03	0.01	-0.01	0.26	0	0.37	0.2	0.04	-0.08	-0.12	0.09	0.03	-0.06	0.11
DESCARTES_FETAL_PLACENTA_AFP_ALB_POSITIVE_CELLS	-0.07	0.66	1.98	0.38	-0.18	0.77	-0.01	0.09	-0.24	0.03	0.03	0.2	0.58	0.46	7.44	0.73	0.12	0.04	0.76	1.82	0.03	0.39	0.32	-0.04	1.46	-0.13	0.34	-0.22	-0.01	-0.24	-0.36	-0.27	-0.68	-0.45	-0.34	-0.32	-0.39	-0.35	-0.39	-0.37	-0.24	-0.33	-0.43	-0.51	-0.43	-0.38	-0.29	-0.39	-0.38
DESCARTES_FETAL_STOMACH_MUC13_DMBT1_POSITIVE_CELLS	0.05	1.06	1	0.12	-0.21	-0.13	0.74	-0.06	-0.55	0.22	-0.11	-0.24	-0.09	0.08	7.78	0.91	-0.27	-0.23	-0.05	0.47	0.36	1.41	0.05	0.2	1.78	-0.21	0.04	-0.23	0.04	-0.08	-0.12	-0.28	-0.37	-0.48	-0.25	-0.39	-0.26	-0.21	-0.18	-0.28	-0.11	-0.39	-0.31	-0.41	-0.3	-0.2	-0.23	-0.22	-0.3
CUI_DEVELOPING_HEART_LEFT_ATRIAL_CARDIOMYOCYTE	-0.15	-0.26	-0.08	1	-0.1	-0.15	-0.11	-0.09	0.05	-0.33	-0.15	-0.31	-0.25	-0.12	4.83	0.5	-0.24	-0.24	-0.27	0.29	-0.26	-0.22	1.09	-0.45	-0.37	-0.27	0.88	-0.32	-0.26	-0.27	-0.09	-0.3	-0.48	-0.27	-0.23	-0.27	-0.36	-0.3	-0.19	-0.37	-0.49	-0.34	-0.34	-0.32	-0.31	-0.37	-0.34	-0.41	-0.34
DESCARTES_FETAL_STOMACH_LYMPHATIC_ENDOTHELIAL_CELLS	-0.31	-0.06	-0.1	0.02	-0.17	0.02	-0.29	0.19	0.11	0.01	-0.19	-0.3	-0.23	-0.28	4.01	-0.22	-0.35	-0.42	-0.42	0.21	-0.35	-0.38	-0.17	-0.22	-0.31	-0.35	0.42	-0.37	-0.37	-0.38	-0.24	-0.38	0.21	-0.42	-0.08	-0.24	-0.3	-0.38	-0.44	-0.18	-0.34	-0.39	-0.38	-0.34	-0.36	-0.36	-0.36	-0.4	-0.38
DESCARTES_MAIN_FETAL_HEPATOBLASTS	-0.06	0.28	0.18	0.39	-0.37	-0.39	-0.15	-0.15	-0.18	-0.06	-0.22	0.36	0.42	0.15	5.61	-0.02	-0.01	-0.11	0.12	-0.08	-0.4	0.06	-0.23	-0.22	-0.02	0.15	0.82	-0.3	-0.16	0.12	0.06	-0.3	-0.22	-0.3	-0.15	-0.2	-0.19	-0.2	-0.13	-0.23	-0.12	-0.18	-0.26	-0.24	-0.39	-0.22	-0.17	-0.22	-0.17
DURANTE_ADULT_OLFACTORY_NEUROEPITHELIUM_GLOBOSE_BASAL_CELLS	-0.13	0.25	0.34	0.82	0.04	-0.21	0.67	-0.12	0.24	-0.09	1.18	0.49	0.49	1.08	8.9	0.11	0.11	-0.17	3.09	1.35	0.7	-0.02	1.39	-0.46	-0.1	-0.22	1.92	0.39	0.38	-0.18	-0.27	-0.24	-0.19	-0.55	-0.35	-0.43	-0.48	-0.28	-0.01	-0.3	-0.32	-0.42	-0.27	-0.38	-0.21	-0.27	-0.13	-0.22	-0.41
DESCARTES_FETAL_EYE_ASTROCYTES	-0.16	-0.06	0.25	-0.35	-0.38	-0.37	-0.2	0.06	-0.29	-0.26	-0.05	0.18	0.84	-0.34	3.96	0.46	-0.42	-0.41	-0.31	0.51	0.35	-0.15	0.59	-0.33	-0.3	-0.42	-0.17	-0.19	-0.23	-0.17	0.31	-0.4	-0.38	-0.3	-0.32	-0.32	-0.21	-0.38	-0.41	-0.42	-0.28	-0.18	-0.28	-0.32	-0.29	-0.33	-0.41	-0.35	-0.41
DESCARTES_FETAL_SPLEEN_STROMAL_CELLS	-0.18	-0.24	-0.13	-0.47	-0.49	-0.5	-0.21	-0.16	0.04	-0.45	0.11	0.02	0.04	-0.4	3.68	0.18	-0.45	-0.44	-0.5	0.22	-0.46	-0.42	0.77	-0.36	-0.34	-0.17	-0.42	-0.28	-0.5	0.69	-0.31	-0.48	-0.46	-0.43	-0.45	-0.46	-0.45	-0.43	-0.47	-0.39	-0.49	-0.46	-0.47	-0.43	-0.45	-0.45	-0.43	-0.47	-0.44
DESCARTES_FETAL_KIDNEY_MESANGIAL_CELLS	-0.08	-0.19	-0.25	-0.08	-0.13	-0.4	0.39	0.14	0.01	-0.15	0.09	0.37	0.29	0.59	3.09	-0.09	-0.32	-0.41	0.19	0.28	-0.13	-0.17	0.5	-0.35	-0.09	-0.19	-0.39	-0.09	-0.25	0.2	0.03	-0.36	-0.1	-0.33	-0.07	-0.23	-0.16	-0.24	-0.46	-0.32	-0.35	-0.22	-0.32	-0.36	-0.2	-0.2	-0.1	-0.3	-0.36
GAUTAM_EYE_IRIS_CILIARY_BODY_CYTOTOXIC_T_CELLS	0.1	0.06	-0.05	0.58	-0.2	0	0.75	1.04	0.54	-0.15	0.97	0.65	0.87	0.53	5.46	0.18	-0.34	-0.32	0.11	0.92	0.24	0.25	2.62	-0.27	-0.01	0	-0.2	-0.14	0.04	-0.12	-0.03	-0.25	-0.19	-0.17	-0.31	-0.32	-0.44	-0.23	-0.28	-0.23	-0.46	-0.18	-0.33	-0.37	-0.37	-0.34	-0.24	-0.28	-0.42
DESCARTES_FETAL_STOMACH_CILIATED_EPITHELIAL_CELLS	-0.02	-0.26	-0.11	-0.15	-0.3	-0.2	0.29	0.24	1.79	0.32	0.22	0.29	0.12	-0.06	5.67	0.02	-0.07	-0.33	0.12	0.24	-0.29	-0.11	0.83	-0.18	0.03	-0.01	-0.2	-0.17	-0.08	-0.36	0.08	-0.28	-0.34	-0.27	-0.16	-0.3	-0.33	-0.34	-0.17	-0.2	-0.15	-0.17	-0.09	-0.22	-0.19	-0.18	-0.09	-0.23	-0.19
DESCARTES_MAIN_FETAL_SYMPATHOBLASTS	0.06	-0.29	-0.18	-0.23	-0.18	-0.29	-0.15	-0.29	-0.15	0.13	0.98	0.27	0.04	-0.1	3.08	0.17	-0.2	-0.36	-0.19	0.05	-0.33	-0.21	0.12	-0.14	-0.14	-0.36	-0.12	-0.3	-0.15	-0.22	-0.11	-0.29	-0.29	-0.2	-0.13	-0.29	-0.41	-0.29	-0.23	-0.28	-0.21	-0.41	-0.24	-0.29	-0.38	-0.35	-0.43	-0.33	-0.35
DESCARTES_FETAL_PLACENTA_SMOOTH_MUSCLE_CELLS	-0.11	0.19	1.01	1.08	0.25	-0.26	0.6	0.12	0.83	-0.25	0.15	0.22	0.41	0.02	3.83	0.6	-0.21	-0.52	0.12	0.15	-0.25	0.37	-0.13	-0.33	-0.27	-0.29	-0.04	-0.3	-0.3	-0.21	-0.1	-0.29	-0.29	-0.47	-0.43	-0.35	-0.2	-0.31	-0.34	-0.35	-0.35	-0.27	-0.42	-0.36	-0.32	-0.3	-0.38	-0.35	-0.36
DESCARTES_MAIN_FETAL_LYMPHOID_CELLS	-0.15	0.16	-0.09	1.53	0.2	0.62	2.23	0.61	0.93	-0.02	0.89	1.81	0.81	0.56	6.94	1.1	-0.26	-0.12	0.81	2.06	0.2	0.1	0.86	-0.14	-0.11	-0.35	0.03	-0.26	-0.3	0.17	-0.38	-0.26	-0.32	-0.19	-0.1	-0.23	-0.33	-0.25	-0.32	-0.24	-0.12	-0.31	-0.13	-0.35	-0.3	-0.18	-0.27	-0.29	-0.22
DESCARTES_MAIN_FETAL_VASCULAR_ENDOTHELIAL_CELLS	-0.26	0.09	0.16	0.84	1.11	0.17	0.25	0.76	0.73	-0.04	0.74	0.77	0.48	-0.08	4.87	0.61	-0.12	-0.27	0.36	0.74	-0.23	0.29	0.71	-0.33	-0.15	-0.21	0.38	-0.42	-0.22	-0.32	-0.33	-0.25	-0.63	-0.51	-0.12	-0.35	-0.26	-0.4	-0.39	-0.3	-0.09	-0.11	-0.23	-0.39	-0.29	-0.37	-0.3	-0.41	-0.32
DESCARTES_FETAL_ADRENAL_ERYTHROBLASTS	-0.2	0.11	2.4	0.09	0.16	-0.05	0.15	0.9	0.88	0.23	1.5	0.84	1.37	0.42	8.04	1.02	-0.2	-0.3	0.43	1.16	0.16	1.12	0.98	-0.26	0	-0.22	-0.17	-0.26	-0.31	-0.13	-0.36	-0.28	-0.38	0.04	0.03	-0.2	-0.23	-0.25	-0.21	-0.2	-0.11	-0.29	-0.29	-0.18	-0.31	-0.27	-0.28	-0.27	-0.33
DESCARTES_FETAL_KIDNEY_ERYTHROBLASTS	-0.13	0.43	1.76	-0.1	0.32	0.8	0.34	1.05	1.09	0.08	0.72	0.09	1.09	0.53	7.05	0.5	-0.17	-0.26	0.15	0.58	0.02	0.33	0.6	-0.24	0.17	-0.23	-0.28	-0.35	-0.16	-0.38	-0.39	-0.26	-0.24	-0.27	-0.35	-0.26	-0.25	-0.36	-0.3	-0.36	-0.39	-0.42	-0.27	-0.36	-0.34	-0.28	-0.4	-0.31	-0.42
DESCARTES_FETAL_PANCREAS_ERYTHROBLASTS	-0.2	0.02	1.43	-0.1	0.33	1.82	0.49	0.15	0.2	0.24	0.54	0.49	0.27	0.5	6.61	0.44	-0.28	-0.38	0.1	0.24	0.23	0.2	0.17	-0.19	-0.04	-0.31	-0.05	-0.34	-0.21	-0.06	-0.16	-0.24	-0.63	-0.4	-0.25	-0.15	-0.25	-0.33	-0.35	-0.29	-0.25	-0.46	-0.33	-0.41	-0.34	-0.29	-0.33	-0.32	-0.34
DESCARTES_FETAL_HEART_SATB2_LRRC7_POSITIVE_CELLS	-0.06	-0.21	-0.08	0.36	0.38	0.02	0.68	2.28	3.57	0.4	2.39	1.11	1.87	0.47	9.58	0.43	-0.38	-0.47	-0.17	1.29	0.64	0.52	0.1	-0.23	-0.08	-0.38	0.28	-0.25	-0.27	0.17	0.08	-0.27	-0.28	-0.18	-0.2	-0.31	-0.18	-0.29	-0.32	-0.2	-0.24	-0.31	-0.25	-0.26	-0.22	-0.33	-0.26	-0.28	-0.42
GAUTAM_EYE_IRIS_CILIARY_BODY_SCHWANN_CELLS	-0.21	0.19	0.53	0.29	-0.06	0.34	0.62	1.2	1.05	0.32	2.61	0.4	0.59	0	6.22	0.8	-0.21	-0.05	0.17	1.48	-0.19	0.31	0.5	-0.21	-0.1	-0.24	0.08	-0.03	-0.28	0.08	-0.01	-0.24	-0.17	-0.01	0.1	-0.3	-0.16	-0.35	-0.35	-0.28	-0.19	-0.08	-0.14	-0.22	-0.32	-0.28	-0.24	-0.3	-0.35
DESCARTES_MAIN_FETAL_DUCTAL_CELLS	-0.32	-0.18	-0.23	-0.36	-0.41	-0.37	-0.13	0.19	0.17	-0.15	0.02	-0.05	0.24	0.31	3.31	0.23	-0.46	-0.4	-0.46	-0.15	-0.37	0.1	0.16	-0.28	-0.46	-0.39	-0.28	-0.4	-0.05	-0.2	-0.37	-0.4	-0.53	-0.47	-0.34	-0.41	-0.34	-0.35	-0.45	-0.41	-0.4	-0.36	-0.44	-0.45	-0.43	-0.44	-0.41	-0.44	-0.45
DESCARTES_MAIN_FETAL_ISLET_ENDOCRINE_CELLS	-0.2	-0.28	-0.16	-0.23	-0.27	-0.16	0.79	1.55	1.16	0.79	0.35	0.58	3.26	-0.24	9.7	0.79	-0.08	-0.29	0.8	1.72	-0.05	0.55	-0.04	-0.33	-0.15	-0.2	-0.04	-0.16	-0.17	0.45	0.08	-0.27	-0.21	-0.26	-0.35	-0.24	-0.12	-0.22	-0.32	-0.29	-0.3	-0.44	-0.32	-0.31	-0.34	-0.33	-0.31	-0.34	-0.33
DESCARTES_MAIN_FETAL_HORIZONTAL_CELLS	-0.16	-0.13	-0.11	-0.04	0.19	-0.3	0.45	0.75	0.89	-0.07	0.81	0.55	0.45	-0.07	7.52	0.24	0	-0.1	0.64	0.78	0.2	0.12	0.56	-0.28	-0.24	-0.05	-0.2	-0.16	-0.17	0.42	-0.11	-0.29	-0.34	-0.47	-0.26	-0.15	-0.4	-0.2	-0.03	-0.13	-0.35	-0.05	-0.17	-0.24	-0.24	-0.23	-0.21	-0.31	-0.29
ZHONG_PFC_C4_PTGDS_POS_OPC	-0.05	-0.03	0.51	0.14	0.36	1.24	1.22	0.94	1.49	0.57	1.28	1.45	1.5	0.1	8.49	0.99	-0.27	-0.23	0.13	1.33	0.21	0.63	0.73	-0.1	-0.05	-0.14	0.31	-0.03	-0.11	0.34	-0.31	-0.23	-0.11	-0.31	-0.11	-0.17	-0.24	-0.31	-0.19	-0.18	-0.18	-0.18	-0.31	-0.33	-0.29	-0.31	-0.21	-0.29	-0.33
BUSSLINGER_DUODENAL_K_CELLS	0.13	-0.13	-0.09	0.13	0.15	-0.23	-0.22	-0.31	-0.1	-0.29	-0.07	0.01	-0.01	-0.13	2.76	-0.01	-0.27	-0.29	-0.07	0.19	-0.24	-0.1	0.05	-0.28	-0.11	-0.37	-0.29	-0.32	-0.23	-0.35	-0.26	-0.21	-0.41	-0.36	-0.36	-0.25	-0.31	-0.18	-0.39	-0.24	-0.22	-0.29	-0.26	-0.36	-0.24	-0.28	-0.28	-0.4	-0.35
DESCARTES_FETAL_LIVER_ERYTHROBLASTS	0.08	-0.11	0.44	-0.11	0.14	-0.09	-0.14	0.19	-0.06	-0.06	0.42	0.87	0.5	-0.13	6.5	0.33	-0.14	-0.34	0.05	0.7	-0.25	0.06	0.79	-0.27	0.01	-0.18	0.04	-0.27	-0.34	-0.19	-0.08	-0.28	-0.11	-0.1	-0.05	-0.2	-0.12	-0.26	-0.26	-0.11	-0.22	-0.16	-0.19	-0.2	-0.46	-0.25	-0.28	-0.28	-0.24
DESCARTES_MAIN_FETAL_SMOOTH_MUSCLE_CELLS	-0.09	-0.24	-0.26	-0.3	-0.4	-0.21	-0.38	0.15	0.76	-0.24	-0.03	0.35	-0.18	-0.04	5.26	0.66	-0.37	-0.31	-0.22	1.07	0.04	0.51	0.1	-0.42	-0.25	-0.38	0.04	-0.33	-0.16	0.05	-0.03	-0.37	-0.14	-0.29	-0.37	-0.24	-0.22	-0.14	-0.21	-0.42	-0.25	-0.29	-0.26	-0.26	-0.45	-0.25	-0.31	-0.28	-0.43
ZHONG_PFC_C1_NEUROD1_POS_EXCITATORY_NEURON	-0.24	-0.37	-0.12	-0.15	-0.24	-0.34	-0.43	0.09	0.55	-0.26	0.05	0.23	-0.18	-0.12	4.89	0.2	-0.43	-0.46	-0.46	1.13	-0.43	0.14	0.67	-0.28	-0.14	-0.17	0.12	-0.36	-0.31	-0.29	-0.19	-0.32	-0.21	-0.23	-0.38	-0.32	-0.28	-0.21	-0.09	-0.42	-0.38	-0.33	-0.34	-0.39	-0.33	-0.34	-0.29	-0.31	-0.37
ZHONG_PFC_C5_BCL11B_CALB2_POS_INP	-0.32	-0.46	-0.49	0.71	0.08	-0.19	-0.19	0.58	0.35	0.5	-0.11	0.55	0.35	0.14	5.84	0.05	-0.02	-0.02	0.51	1.58	-0.48	0.37	0.51	-0.32	0.27	-0.33	0.21	-0.36	-0.37	-0.19	0.08	-0.33	-0.32	-0.39	-0.33	-0.35	-0.29	-0.34	-0.22	-0.4	-0.22	-0.35	-0.32	-0.19	-0.31	-0.32	-0.23	-0.27	-0.3
DESCARTES_FETAL_CEREBELLUM_GRANULE_NEURONS	-0.19	-0.39	-0.08	0.68	-0.17	-0.35	-0.04	0.73	0.09	0.56	1.95	-0.32	0.26	-0.39	5.76	0.74	-0.37	-0.4	-0.4	0.49	-0.39	1.27	-0.26	-0.29	-0.36	-0.34	-0.37	-0.38	0.08	0.49	-0.34	-0.42	-0.25	-0.39	-0.4	-0.36	-0.24	-0.39	-0.39	-0.39	-0.38	-0.36	-0.37	-0.38	-0.36	-0.38	-0.37	-0.38	-0.38
FAN_EMBRYONIC_CTX_NSC_1	0.08	-0.11	0.38	0.63	0.51	0.15	-0.08	0.16	0.35	-0.03	0.93	0.68	0.73	0.73	5.11	-0.09	-0.29	-0.27	-0.19	0.29	0.29	1.95	-0.14	-0.06	-0.25	-0.12	0.64	-0.16	-0.14	-0.52	-0.1	-0.25	-0.16	-0.09	-0.15	-0.29	-0.19	-0.23	-0.37	-0.26	-0.28	-0.3	-0.3	-0.33	-0.34	-0.31	-0.26	-0.25	-0.29
GAUTAM_EYE_CHOROID_SCLERA_MONOCYTES	0.29	0.24	0.33	1	0.56	0.8	0.6	1.15	1.16	0.42	1.52	1.29	0.69	1.01	10.27	1.89	0.1	0.1	1.52	2.91	0.73	3.27	1.45	0.15	0.05	-0.07	0.91	0.39	0.21	0.3	0.14	-0.21	0.28	-0.05	-0.03	-0.04	-0.16	-0.1	0.08	0.03	0.1	-0.03	0.06	-0.17	-0.1	0.12	-0.02	-0.13	-0.07
DESCARTES_MAIN_FETAL_SATELLITE_CELLS	-0.34	-0.2	-0.08	-0.3	-0.18	-0.24	1.06	0.47	0.63	0.43	1.43	0.83	0.84	-0.03	7.54	0.23	-0.39	-0.32	-0.24	0.45	-0.31	2	1.31	-0.28	-0.06	-0.05	0.69	-0.4	-0.25	-0.22	0.12	-0.25	-0.25	-0.51	-0.33	-0.37	-0.29	-0.31	-0.26	-0.41	-0.32	-0.37	-0.27	-0.33	-0.23	-0.34	-0.34	-0.38	-0.34
ZHENG_CORD_BLOOD_C4_PUTATIVE_EARLY_ERYTHROID_COMMITMENT	-0.03	0.21	0.61	0.22	-0.02	-0.02	1.31	0.8	0.92	0.06	2.03	1.39	0.45	0.07	7.96	0.69	-0.28	-0.12	0.37	1.84	0.17	2.35	0.87	-0.17	-0.16	0.17	0.73	-0.26	0.22	0.09	0.34	-0.17	-0.16	-0.06	-0.04	-0.21	-0.09	-0.12	-0.2	-0.16	-0.19	-0.27	-0.18	-0.28	-0.23	-0.16	-0.1	-0.21	-0.22
DESCARTES_FETAL_INTESTINE_LYMPHATIC_ENDOTHELIAL_CELLS	-0.29	-0.01	0.07	-0.14	0.08	-0.05	-0.52	0.51	0.75	0.23	-0.24	0.32	0.28	0.09	2.87	0.33	-0.33	-0.43	-0.41	0.4	-0.48	0.04	0.36	-0.27	-0.18	-0.35	-0.39	-0.4	-0.46	-0.14	-0.17	-0.35	-0.4	-0.4	-0.3	-0.3	-0.23	-0.25	-0.4	-0.33	-0.34	-0.37	-0.35	-0.35	-0.49	-0.38	-0.47	-0.41	-0.38
GAUTAM_EYE_CORNEA_CYTOTOXIC_T_CELLS	-0.26	-0.19	-0.14	0.21	0.07	-0.1	1.64	1.8	2.91	0.18	0.72	0.53	0.59	0.19	6.61	0.73	-0.15	-0.15	0.34	2.68	0.46	0.45	0.98	-0.25	0.16	-0.03	0.04	-0.2	-0.23	0.01	-0.13	-0.25	0.16	-0.24	-0.11	-0.24	-0.17	-0.29	-0.19	-0.37	-0.24	-0.21	-0.28	-0.27	-0.36	-0.26	-0.22	-0.26	-0.33
ZHONG_PFC_C2_UNKNOWN_NPC	-0.28	-0.16	-0.13	0.28	-0.08	-0.15	0.36	0.93	1.86	-0.03	0.34	0.04	0.01	-0.24	4.86	0.41	-0.27	-0.21	-0.03	0.68	-0.31	0.09	1.02	-0.34	0.01	-0.07	0.11	-0.31	-0.28	0.06	-0.17	-0.31	0.07	-0.17	-0.26	-0.17	-0.23	-0.29	-0.1	-0.37	-0.45	-0.22	-0.26	-0.33	-0.27	-0.25	-0.27	-0.29	-0.29
DESCARTES_FETAL_STOMACH_ERYTHROBLASTS	-0.28	0.74	2.37	-0.19	0.14	1.69	0.37	0.16	0.03	-0.01	0.54	0.96	1.01	0.36	3.68	0.51	-0.25	-0.2	0.48	1.12	-0.02	0.1	0.91	-0.37	0.05	-0.15	-0.19	-0.33	-0.15	0.05	-0.17	-0.27	-0.6	-0.32	-0.15	-0.26	-0.34	-0.22	-0.36	-0.31	-0.3	-0.29	-0.3	-0.38	-0.35	-0.33	-0.32	-0.31	-0.35
DESCARTES_FETAL_PLACENTA_EXTRAVILLOUS_TROPHOBLASTS	-0.15	0.88	0.03	0.44	0.03	-0.16	0.39	-0.19	-0.2	-0.29	0.13	1.25	0.96	-0.03	2.11	0.38	-0.31	-0.24	0.48	0.35	-0.05	-0.22	0.15	-0.09	-0.24	-0.18	-0.07	-0.39	0.04	-0.25	-0.03	-0.27	-0.31	-0.15	-0.38	-0.28	-0.4	-0.35	-0.45	-0.3	-0.41	-0.38	-0.34	-0.3	-0.32	-0.39	-0.33	-0.34	-0.38
DESCARTES_MAIN_FETAL_SKELETAL_MUSCLE_CELLS	-0.4	2.34	0.1	-0.02	-0.02	0.08	-0.16	-0.05	0	-0.17	0.05	2.92	1.44	0.82	5.22	0.32	-0.42	-0.49	-0.1	1.99	0.34	0.21	0.58	0.1	0	-0.2	1.15	-0.38	-0.28	0.15	-0.04	-0.32	-0.32	-0.39	-0.12	-0.18	-0.32	-0.3	-0.33	-0.39	-0.37	-0.28	-0.36	-0.36	-0.32	-0.3	-0.29	-0.38	-0.38
HAY_BONE_MARROW_CD34_POS_PRE_B	-0.15	2.42	0.61	0.9	0.07	0.59	0.64	0.8	0.44	0.1	0.6	1.81	2.44	1.4	7.64	1.24	-0.36	-0.34	-0.28	0.64	-0.14	0.04	0.19	-0.17	-0.01	-0.17	0.46	-0.36	-0.21	0.22	-0.21	-0.24	-0.4	-0.52	-0.12	-0.42	-0.24	-0.34	-0.12	-0.25	-0.16	-0.23	-0.42	-0.38	-0.46	-0.33	-0.26	-0.31	-0.36
DESCARTES_FETAL_STOMACH_PDE1C_ACSM3_POSITIVE_CELLS	-0.17	-0.07	0.05	-0.02	0.16	-0.08	0.18	0.14	0.11	0.1	0.2	0.11	0.09	0.15	1.79	0.37	-0.09	-0.19	0.63	0.3	-0.07	-0.31	-0.22	-0.21	0.5	-0.2	-0.15	-0.17	-0.09	0.14	0.13	-0.22	-0.65	-0.41	-0.3	-0.36	-0.3	-0.14	-0.1	-0.39	-0.15	-0.05	-0.17	-0.14	-0.32	-0.23	-0.19	-0.31	-0.27
TRAVAGLINI_LUNG_CD4_NAIVE_T_CELL	-0.1	-0.39	-0.18	0.04	0.16	-0.04	1.23	0.31	0.26	-0.12	0.64	0.09	-0.16	0.12	2.41	0.41	-0.14	-0.19	0.1	0.54	-0.2	0.15	-0.04	0.31	1.68	0.37	-0.02	-0.36	0.31	-0.43	0.35	-0.3	-0.42	-0.46	-0.46	-0.36	-0.34	-0.13	-0.34	-0.23	-0.33	-0.12	-0.32	-0.24	-0.28	-0.36	-0.24	-0.3	-0.32
DESCARTES_FETAL_THYMUS_THYMOCYTES	-0.04	-0.28	-0.09	0.08	0.04	-0.06	-0.23	-0.17	0.03	-0.13	0.17	-0.25	-0.2	0.01	0.86	-0.09	-0.28	-0.22	-0.38	-0.33	-0.16	-0.22	0.19	-0.35	-0.29	-0.19	-0.34	-0.24	-0.21	0.12	-0.24	-0.25	-0.34	-0.36	0.08	-0.34	-0.3	-0.33	-0.31	-0.34	-0.17	-0.17	-0.27	-0.26	-0.25	-0.2	-0.22	-0.28	-0.31
DURANTE_ADULT_OLFACTORY_NEUROEPITHELIUM_NK_CELLS	-0.37	0.46	1.63	0.75	-0.07	-0.04	0.98	-0.01	-0.13	-0.34	0.11	0.39	0.62	0.11	1.01	0.61	-0.21	-0.43	3.02	1.61	-0.15	0.09	2.9	-0.24	-0.38	-0.51	0.11	-0.37	-0.03	-0.6	-0.19	-0.3	-0.54	-0.41	-0.38	-0.51	-0.51	-0.35	-0.37	-0.47	-0.44	-0.38	-0.36	-0.48	-0.42	-0.57	-0.37	-0.4	-0.41
FAN_EMBRYONIC_CTX_BRAIN_EFFECTOR_T_CELL	0.18	0.15	1.21	2.15	0.45	0.01	0.58	-0.11	-0.09	-0.27	0.63	0.16	0.29	-0.07	0.99	0.52	-0.2	-0.35	2.43	2.27	-0.18	1.01	1.77	-0.32	-0.4	-0.41	-0.28	-0.28	-0.28	-0.62	-0.43	-0.36	-0.61	-0.46	-0.49	-0.53	-0.45	-0.42	-0.39	-0.42	-0.38	-0.45	-0.35	-0.49	-0.5	-0.52	-0.4	-0.4	-0.45
DESCARTES_MAIN_FETAL_CSH1_CSH2_POSITIVE_CELLS	-0.15	-0.07	-0.16	0.13	-0.25	0.22	-0.2	0.66	0.57	0.03	1.21	-0.17	-0.19	-0.22	0.89	0	-0.2	-0.4	0.29	0.39	-0.29	-0.14	0.54	0.07	-0.05	-0.37	-0.32	-0.32	-0.33	0.09	-0.07	-0.23	-0.46	-0.33	-0.29	-0.4	-0.33	-0.28	-0.19	-0.31	-0.33	-0.42	-0.22	-0.43	-0.31	-0.3	-0.36	-0.36	-0.45
GAO_ESOPHAGUS_25W_C3_FGFR1LOW_EPITHELIAL_CELLS	-0.37	0.78	-0.08	0.14	0.02	0.12	-0.23	0.21	0.14	-0.1	0.15	0.05	0.16	-0.02	1.07	0.21	-0.23	-0.18	0.27	0.46	-0.19	-0.14	0.3	0.02	0.46	-0.28	0	-0.23	-0.42	0.11	-0.02	-0.22	-0.63	-0.37	-0.49	-0.37	-0.44	-0.43	-0.16	-0.4	-0.29	-0.31	-0.36	-0.3	-0.43	-0.28	-0.34	-0.37	-0.37
DESCARTES_FETAL_LUNG_VASCULAR_ENDOTHELIAL_CELLS	-0.22	0	0.22	0.14	0.63	-0.31	0.48	0.32	0.81	0.12	0.49	0.26	0.09	-0.14	1.27	-0.02	-0.35	-0.42	0.23	1.05	0.82	0.3	0.15	-0.34	0.3	-0.33	-0.27	-0.27	-0.26	-0.04	-0.47	-0.36	-0.14	-0.35	-0.42	-0.32	-0.41	-0.31	-0.46	-0.22	-0.21	-0.42	-0.39	-0.41	-0.33	-0.44	-0.3	-0.43	-0.45
BUSSLINGER_DUODENAL_EC_CELLS	-0.2	-0.31	-0.26	0.42	-0.3	-0.42	0.51	0.14	0.24	0.17	0.83	-0.12	2.63	1.05	2.85	-0.04	-0.04	-0.23	0.87	1.77	-0.41	-0.5	0.5	-0.37	-0.22	-0.27	-0.13	-0.42	-0.3	0.01	-0.04	-0.33	-0.46	-0.43	-0.32	-0.38	-0.32	-0.29	-0.2	-0.29	-0.27	-0.18	-0.23	-0.28	-0.33	-0.36	-0.27	-0.31	-0.34
BUSSLINGER_GASTRIC_D_CELLS	-0.08	-0.12	-0.12	0.41	-0.25	-0.3	1.41	0.64	0.71	0.38	1.07	1.67	3.48	1.38	1.98	0.53	-0.24	-0.22	0.13	1.16	-0.16	-0.23	0.59	-0.15	-0.4	-0.34	-0.53	-0.29	-0.2	0.62	0.16	-0.31	-0.48	-0.3	-0.26	-0.32	-0.28	-0.14	-0.09	-0.25	-0.25	-0.39	-0.32	-0.34	-0.21	-0.3	-0.23	-0.24	-0.26
DESCARTES_MAIN_FETAL_BRONCHIOLAR_AND_ALVEOLAR_EPITHELIAL_CELLS	-0.08	0.11	0.24	-0.3	0.03	-0.23	0.5	0.38	1.39	-0.17	0.35	1.95	1.02	-0.07	0.96	0.21	-0.3	-0.31	0.64	2.27	-0.04	0.35	-0.05	-0.19	-0.32	-0.19	0.68	-0.26	-0.08	0.19	-0.03	-0.3	-0.43	-0.28	-0.3	-0.33	-0.28	-0.35	-0.42	-0.37	-0.38	-0.38	-0.37	-0.39	-0.38	-0.26	-0.33	-0.37	-0.37
CUI_DEVELOPING_HEART_C2_CARDIOMYOCYTE	-0.4	0.93	0.59	0.9	1.63	-0.05	0.16	0.19	0.39	-0.07	0.34	3.02	3.67	0.57	2.81	0.39	-0.43	-0.3	0.09	4.64	-0.11	0.36	1.03	-0.37	1.43	0.2	-0.01	-0.31	-0.51	0.6	0.06	-0.3	-0.4	-0.22	-0.25	-0.37	-0.46	-0.58	-0.25	-0.45	-0.42	-0.24	-0.53	-0.46	-0.42	-0.38	-0.39	-0.43	-0.48
DESCARTES_FETAL_EYE_SKELETAL_MUSCLE_CELLS	-0.36	-0.04	-0.27	0.04	-0.1	-0.26	0.55	0.84	1.42	0.47	0.06	3.01	3.51	0.41	2.48	0.23	-0.38	-0.42	-0.11	2.92	0.21	0.2	0.94	-0.23	-0.13	-0.37	0.23	-0.39	-0.34	-0.09	-0.01	-0.34	-0.47	-0.41	-0.34	-0.46	-0.46	-0.55	-0.37	-0.48	-0.43	-0.26	-0.46	-0.42	-0.42	-0.35	-0.45	-0.41	-0.45
DESCARTES_FETAL_KIDNEY_MEGAKARYOCYTES	-0.23	0.01	-0.22	-0.25	-0.22	-0.3	-0.27	0.56	0.48	-0.16	-0.04	1.37	0.69	0.32	1.3	-0.11	-0.32	-0.33	-0.2	1.37	-0.34	-0.15	0.35	-0.29	0.03	-0.31	-0.35	-0.31	-0.29	-0.12	-0.32	-0.3	-0.42	-0.37	-0.25	-0.33	-0.3	-0.28	-0.25	-0.27	-0.33	-0.16	-0.34	-0.3	-0.33	-0.29	-0.3	-0.33	-0.33
TRAVAGLINI_LUNG_SIGNALING_ALVEOLAR_EPITHELIAL_TYPE_2_CELL	-0.24	0.14	0.45	0.15	-0.15	-0.1	0.5	0.32	0.74	-0.19	0.22	3.57	2.92	0.25	1.02	0.2	-0.21	-0.44	0.06	2.53	-0.08	0.21	0.41	-0.13	-0.13	0.02	-0.31	-0.32	0.08	-0.63	-0.13	-0.31	-0.46	-0.31	-0.37	-0.38	-0.21	-0.21	-0.25	-0.39	-0.2	-0.35	-0.4	-0.42	-0.45	-0.37	-0.31	-0.42	-0.4
DESCARTES_FETAL_SPLEEN_MEGAKARYOCYTES	-0.13	1.53	0.22	0.78	0.11	0.11	0.14	0.89	1.77	0.33	1.48	3.9	5.23	0.81	3.51	0.25	-0.17	-0.24	0.31	2.11	-0.01	0.34	0.42	-0.23	-0.08	-0.38	-0.12	-0.18	-0.17	-0.29	-0.01	-0.33	-0.34	-0.16	-0.22	-0.32	-0.24	-0.36	-0.22	-0.4	-0.31	-0.13	-0.23	-0.35	-0.4	-0.29	-0.26	-0.25	-0.31
DESCARTES_FETAL_LIVER_MEGAKARYOCYTES	-0.32	-0.13	-0.3	-0.15	-0.02	-0.23	-0.1	0.31	0.37	-0.13	0.3	2.44	3.36	0.37	3.53	0.3	-0.25	-0.32	0.19	1.17	0.16	0.15	0.82	-0.37	0.17	-0.34	-0.35	-0.31	-0.28	-0.35	-0.42	-0.32	-0.34	-0.37	-0.24	-0.36	-0.36	-0.4	-0.37	-0.37	-0.39	-0.33	-0.39	-0.39	-0.37	-0.4	-0.37	-0.4	-0.39
DESCARTES_FETAL_LUNG_MEGAKARYOCYTES	-0.34	0.47	0.35	-0.09	-0.01	-0.1	-0.19	0.21	0.31	-0.06	0.35	2.14	2.87	0.18	2.76	0.15	-0.4	-0.38	0.33	1.18	0.3	0.1	0.41	-0.38	-0.27	-0.42	-0.25	-0.39	-0.3	-0.44	-0.32	-0.39	-0.27	-0.4	-0.27	-0.39	-0.39	-0.39	-0.37	-0.38	-0.4	-0.41	-0.36	-0.4	-0.39	-0.4	-0.42	-0.41	-0.45
TRAVAGLINI_LUNG_CLUB_CELL	0.05	0.47	0.8	0.06	0.17	-0.02	0.01	-0.07	0.15	-0.21	0.35	3.16	3.13	0.32	2.73	0.44	-0.09	-0.24	0.17	1.31	0.32	0.09	0.17	-0.06	-0.05	-0.14	-0.17	-0.08	-0.02	-0.01	-0.33	-0.31	-0.4	-0.42	-0.29	-0.28	-0.39	-0.32	-0.41	-0.24	-0.37	-0.36	-0.38	-0.29	-0.43	-0.37	-0.31	-0.36	-0.39
HAY_BONE_MARROW_CD34_POS_GRAN	0.36	0.15	0.64	0.21	0.17	0.01	0.83	0.37	0.6	0.15	0.59	1.88	1.38	0.32	2.13	0.43	-0.26	-0.15	0.1	1.25	0.31	0.14	0.08	-0.18	0.03	-0.19	-0.2	-0.28	0.02	-0.53	-0.19	-0.27	-0.48	-0.2	-0.43	-0.22	-0.29	-0.26	-0.23	-0.24	-0.29	-0.31	-0.41	-0.35	-0.43	-0.27	-0.31	-0.37	-0.29
DESCARTES_FETAL_PLACENTA_MEGAKARYOCYTES	-0.41	0.87	0.73	-0.11	0.01	-0.21	-0.15	0.91	0.6	1.17	2.54	2.19	2.66	0.08	2.21	-0.03	-0.4	-0.39	0.67	1.28	0.5	0.42	0.27	-0.41	-0.25	-0.41	-0.24	-0.43	-0.42	-0.47	-0.46	-0.38	-0.42	-0.45	-0.41	-0.43	-0.45	-0.39	-0.44	-0.43	-0.43	-0.43	-0.43	-0.42	-0.43	-0.42	-0.43	-0.43	-0.46
DESCARTES_FETAL_CEREBRUM_MEGAKARYOCYTES	-0.35	1.47	2.3	0.14	0.16	0.08	0.12	1.24	1.67	0.37	0.95	2.78	2.97	0.21	2.06	0.28	-0.27	-0.28	1.22	1.74	0.07	0.36	0	-0.19	-0.33	-0.26	0	-0.42	-0.23	-0.35	-0.33	-0.39	-0.34	-0.35	-0.32	-0.36	-0.39	-0.37	-0.37	-0.42	-0.37	-0.39	-0.36	-0.4	-0.4	-0.44	-0.39	-0.4	-0.36
ZHONG_PFC_C9_ORG_OTHER	0.08	1.22	2.47	0.33	-0.16	-0.29	0.71	0.74	1.18	0.06	0.96	2.64	2.7	-0.2	1.58	0.03	-0.38	-0.42	1.39	2.48	0.4	0.1	0.54	-0.08	-0.07	-0.28	-0.41	-0.32	-0.19	-0.32	-0.37	-0.36	-0.52	-0.47	-0.51	-0.41	-0.43	-0.44	-0.47	-0.4	-0.41	-0.45	-0.42	-0.44	-0.47	-0.38	-0.38	-0.4	-0.43
HAY_BONE_MARROW_CD34_POS_PRE_PC	0.23	1.13	1.1	0.15	0.05	0.04	1.59	0.71	0.77	-0.12	0.68	2.94	2.61	0.01	1.5	0.21	-0.23	-0.3	0.46	1.7	0.57	0.08	-0.12	-0.15	-0.01	-0.27	-0.32	-0.3	0.03	-0.32	-0.21	-0.31	-0.15	-0.35	-0.3	-0.41	-0.43	-0.31	-0.45	-0.34	-0.41	-0.31	-0.31	-0.4	-0.42	-0.39	-0.41	-0.46	-0.36
DESCARTES_FETAL_EYE_RETINAL_PIGMENT_CELLS	-0.17	0.21	0.81	-0.02	-0.34	-0.38	0.22	0.33	0.31	-0.01	1.07	0.57	0.57	0.51	1.57	0.14	-0.33	-0.28	-0.37	2.37	-0.26	-0.25	0.99	-0.33	0.05	-0.43	-0.22	-0.39	-0.12	-0.02	-0.1	-0.37	-0.36	-0.37	-0.33	-0.2	-0.23	-0.1	-0.45	-0.25	-0.06	-0.43	-0.36	-0.31	-0.39	-0.27	-0.39	-0.41	-0.33
DESCARTES_FETAL_HEART_ENDOCARDIAL_CELLS	0.04	0.61	1.27	0.21	-0.23	-0.3	-0.12	0.11	0.07	0.08	0.69	1.82	2.05	0.11	2.05	0.2	0	0.2	0.88	2.32	0.27	-0.46	0.74	-0.17	0.01	-0.28	0.1	-0.53	-0.21	0.55	-0.04	-0.31	-0.25	-0.35	-0.33	-0.33	-0.12	-0.27	-0.36	-0.41	-0.44	-0.39	-0.35	-0.29	-0.34	-0.29	-0.33	-0.33	-0.43
TRAVAGLINI_LUNG_PROLIFERATING_NK_T_CELL	-0.01	0.78	1.83	0.42	0.26	0.38	1.07	0.55	0.66	-0.04	1.74	1.32	1.6	0.14	2.57	1.2	-0.06	-0.12	0.56	3.96	-0.08	0.1	1.65	-0.42	0.27	-0.26	0.31	-0.28	0.05	1.27	-0.06	-0.23	-0.17	-0.12	-0.19	-0.09	0.06	-0.41	-0.15	-0.36	-0.3	-0.33	-0.41	-0.38	-0.24	-0.04	-0.14	-0.19	-0.37
DESCARTES_MAIN_FETAL_ANTIGEN_PRESENTING_CELLS	-0.28	-0.02	-0.07	0.97	-0.15	0.05	0.26	-0.11	-0.11	-0.3	0.3	0.98	1.96	1.06	0.93	0.42	-0.18	-0.26	0.63	1.57	-0.07	0.04	0.33	-0.34	-0.19	-0.17	-0.4	-0.3	-0.34	0.68	0.16	-0.34	-0.37	-0.34	-0.3	-0.38	-0.35	-0.26	-0.15	-0.19	-0.26	-0.28	-0.32	-0.43	-0.4	-0.33	-0.3	-0.33	-0.39
GAO_LARGE_INTESTINE_ADULT_CG_GOBLET_CELL_SUBTYPE_2	0.06	0.46	0.7	0.85	0.68	0.47	0.76	0.29	0.27	-0.14	0.56	1.81	1.73	1.32	1.13	0.95	-0.06	-0.1	0.39	2.5	0.65	0.45	1.01	0.11	-0.06	0.26	0.29	-0.04	-0.14	1	0.65	-0.23	-0.16	0.17	0.14	0	-0.32	-0.09	0.05	-0.14	0.06	0.1	-0.07	-0.16	-0.17	0.04	-0.08	-0.16	-0.09
TRAVAGLINI_LUNG_MYELOID_DENDRITIC_TYPE_1_CELL	-0.22	-0.3	0.34	-0.22	0.03	-0.01	-0.13	-0.04	0.07	-0.23	0.27	0.28	1.12	0.18	0.39	0.25	-0.3	-0.43	-0.01	1.32	-0.13	-0.16	0.55	-0.18	0.04	-0.41	-0.21	-0.39	-0.22	0.11	-0.01	-0.33	-0.13	-0.24	-0.25	-0.27	-0.39	-0.3	-0.56	-0.52	-0.34	-0.29	-0.41	-0.45	-0.29	-0.43	-0.42	-0.47	-0.47
CUI_DEVELOPING_HEART_RIGHT_VENTRICULAR_CARDIOMYOCYTE	0.2	-0.26	-0.26	-0.21	-0.25	-0.14	-0.27	0.15	0.74	-0.04	1.01	0.64	1.44	0.02	0.59	1.28	0.11	-0.05	1.72	1.49	0.29	0.96	1.7	-0.36	0.03	-0.33	0.08	-0.36	-0.03	0	-0.17	-0.31	-0.52	-0.46	-0.35	-0.43	-0.44	-0.33	-0.4	-0.39	-0.42	-0.4	-0.32	-0.5	-0.44	-0.48	-0.32	-0.46	-0.46
RUBENSTEIN_SKELETAL_MUSCLE_T_CELLS	0.13	-0.03	-0.06	0.13	0.35	0.32	0.04	0.24	0.25	0.02	0.61	1.4	0.67	0.13	1.83	1.01	-0.1	-0.21	2.3	2.52	0.55	1.66	1.31	-0.11	0.99	0.27	0.08	-0.08	0.14	0.17	-0.27	-0.26	-0.46	-0.48	-0.41	-0.3	-0.37	-0.24	-0.45	-0.28	-0.28	-0.37	-0.41	-0.28	-0.37	-0.3	-0.3	-0.39	-0.4
DESCARTES_FETAL_LUNG_MYELOID_CELLS	0.04	0.01	0.41	-0.11	-0.36	-0.02	-0.38	-0.06	0.36	0.07	0.25	0.73	0.33	1.45	2.14	0.9	0.06	0.07	1	2.74	1.05	0.16	0.32	-0.34	0.07	-0.25	-0.12	-0.24	-0.12	0.99	0.67	-0.32	-0.16	-0.19	-0.09	-0.08	-0.23	-0.19	-0.04	-0.36	-0.08	-0.01	-0.2	-0.08	-0.22	0.25	-0.13	-0.16	-0.22
DESCARTES_FETAL_STOMACH_MYELOID_CELLS	-0.03	0.35	0.81	0.59	-0.21	0.03	-0.24	-0.14	-0.14	0.01	0.1	0.16	1.35	1.33	2.15	0.83	0.39	0.26	2.54	1.81	-0.24	0.41	-0.11	-0.36	0.1	-0.33	-0.1	-0.25	-0.07	0.97	0.39	-0.26	-0.59	-0.36	-0.16	-0.04	-0.29	-0.33	-0.21	-0.19	-0.23	-0.41	-0.21	-0.26	-0.28	0.05	-0.2	-0.29	-0.36
DESCARTES_FETAL_SPLEEN_ERYTHROBLASTS	-0.07	-0.11	-0.12	0	0.14	-0.05	-0.14	0.34	0.01	-0.06	0.22	0.34	0.09	-0.25	1.62	0.36	-0.24	-0.18	1.21	0.03	-0.39	0.13	-0.02	-0.29	-0.22	-0.1	-0.17	-0.4	-0.37	0.34	-0.15	-0.26	-0.52	0	-0.06	-0.37	-0.37	-0.24	-0.24	-0.46	-0.4	-0.42	-0.39	-0.37	-0.43	-0.26	-0.28	-0.34	-0.31
CUI_DEVELOPING_HEART_ENDOCARDIAL_CELL	-0.26	0.08	0.08	0.19	0.08	-0.15	0.76	0.1	0.15	0.15	0.18	0.86	0.53	0.25	3.35	0.88	-0.29	-0.33	1.5	1.27	0.22	-0.06	0	-0.19	-0.08	-0.29	-0.01	-0.15	-0.35	0.08	-0.17	-0.3	-0.4	-0.33	-0.31	-0.33	-0.33	-0.31	-0.35	-0.33	-0.32	-0.34	-0.33	-0.37	-0.38	-0.36	-0.33	-0.34	-0.33
DESCARTES_FETAL_PLACENTA_PAEP_MECOM_POSITIVE_CELLS	-0.26	-0.31	-0.21	0.25	-0.12	-0.23	1.42	0.42	0.37	-0.07	0.24	0.66	0.79	0.36	4.37	2.18	0.81	0.52	2.87	2.01	1.14	-0.15	0.61	-0.23	0.06	-0.24	-0.03	-0.31	-0.39	-0.31	-0.28	-0.25	-0.22	-0.45	-0.34	-0.36	-0.35	-0.22	-0.3	-0.3	-0.31	-0.37	-0.36	-0.38	-0.36	-0.34	-0.35	-0.35	-0.31
MENON_FETAL_KIDNEY_0_CAP_MESENCHYME_CELLS	-0.21	0.1	0.06	1.12	0.23	0.1	1.46	0.99	1.64	-0.06	0.2	0.2	0.94	0.17	4.71	1.05	0.01	-0.04	2.25	0.99	0.48	0.38	0.59	-0.33	-0.08	-0.07	0.03	-0.29	0.04	0.49	0.27	-0.27	-0.15	-0.13	-0.21	-0.29	-0.16	-0.41	-0.16	-0.34	-0.37	-0.16	-0.36	-0.28	-0.3	-0.17	-0.23	-0.28	-0.28
DESCARTES_FETAL_LUNG_LYMPHATIC_ENDOTHELIAL_CELLS	-0.12	-0.21	-0.35	0.08	0.15	-0.03	1.72	0.51	-0.03	0.02	0.19	-0.01	0.16	0.23	5.4	0.6	0.44	0.24	3.82	0.73	0.65	0.44	0.39	-0.31	-0.1	-0.12	0.2	-0.41	-0.2	0.69	-0.16	-0.34	-0.52	-0.31	-0.48	-0.44	-0.05	-0.38	-0.44	-0.39	-0.36	-0.43	-0.23	-0.33	-0.38	-0.39	-0.35	-0.48	-0.34
DESCARTES_FETAL_PANCREAS_SMOOTH_MUSCLE_CELLS	-0.11	0.3	-0.2	0.15	0.13	-0.04	-0.35	-0.24	-0.32	-0.31	-0.15	-0.34	-0.3	-0.3	4.1	0.54	1.53	1.08	4.29	0.94	0.98	0.23	1.14	-0.31	0.15	-0.04	-0.36	-0.33	-0.44	0.57	-0.51	-0.39	-0.42	-0.4	-0.45	-0.41	-0.36	-0.42	-0.39	-0.44	-0.23	-0.36	-0.38	-0.42	-0.35	-0.36	-0.38	-0.41	-0.37
GAO_LARGE_INTESTINE_24W_C5_LGR5POS_STEM_CELL	-0.33	0.27	-0.15	-0.12	-0.13	-0.37	-0.23	0.1	0.34	-0.23	-0.1	0.05	-0.1	0.04	4.13	0.1	0.9	0.54	2.84	0.72	0.66	0.04	0.56	-0.43	-0.3	-0.33	-0.34	-0.36	-0.44	-0.25	-0.21	-0.38	-0.44	-0.45	-0.32	-0.36	-0.37	-0.32	-0.32	-0.4	-0.33	-0.33	-0.4	-0.44	-0.39	-0.4	-0.36	-0.4	-0.41
DESCARTES_FETAL_MUSCLE_LYMPHATIC_ENDOTHELIAL_CELLS	0.16	-0.05	-0.33	0.29	-0.03	0.01	-0.41	0.89	0.65	-0.1	0.27	0.77	1.22	0.37	5.12	0.53	0.62	0.53	4.68	1.82	0.17	-0.22	0.44	-0.23	-0.34	-0.1	-0.19	-0.37	-0.17	-0.45	-0.11	-0.3	-0.58	-0.33	-0.21	-0.31	-0.14	-0.28	-0.38	-0.29	-0.3	-0.41	-0.27	-0.31	-0.38	-0.46	-0.39	-0.42	-0.44
DESCARTES_MAIN_FETAL_LYMPHATIC_ENDOTHELIAL_CELLS	0.07	0.49	0.71	0.42	0.3	0.1	-0.12	0.94	0.39	0.06	0.21	0.57	0.64	0	4.71	1.12	0.48	0.21	4.58	1.66	0.24	0.02	0.23	-0.18	-0.2	-0.24	-0.12	-0.14	-0.33	-0.09	-0.12	-0.22	-0.19	-0.33	-0.36	-0.22	-0.26	-0.37	-0.29	-0.28	-0.26	-0.33	-0.27	-0.31	-0.27	-0.39	-0.25	-0.4	-0.39
GAO_ESOPHAGUS_25W_C1_CILIATED_EPITHELIAL_CELLS	0.28	0.4	0.09	0.06	-0.1	-0.02	0.57	0.65	1.05	0.05	1.45	1.78	1.61	0.05	6.9	1.33	0.54	0.36	4.68	2.48	0.32	0.39	1.15	-0.24	0.04	0.15	0.19	-0.18	0.02	0.34	-0.12	-0.24	-0.43	-0.28	-0.18	-0.3	-0.32	-0.24	-0.31	-0.27	-0.2	-0.22	-0.36	-0.32	-0.4	-0.3	-0.24	-0.29	-0.32
DURANTE_ADULT_OLFACTORY_NEUROEPITHELIUM_OLFACTORY_MICROVILLAR_CELLS	-0.09	0.13	-0.23	-0.16	-0.24	-0.25	0.54	0.27	0.61	0.06	0.71	0.25	0.44	0.13	1.98	0.8	-0.23	-0.29	3.29	1.01	-0.15	0.11	0.19	-0.2	-0.23	-0.31	-0.14	-0.33	-0.15	-0.14	-0.18	-0.29	-0.27	-0.34	-0.3	-0.33	-0.34	-0.31	-0.28	-0.29	-0.29	-0.35	-0.31	-0.3	-0.37	-0.31	-0.34	-0.34	-0.31
DESCARTES_FETAL_INTESTINE_MESOTHELIAL_CELLS	-0.29	0.72	1.45	-0.29	-0.37	-0.44	0.72	0.4	0.03	0.16	0.19	0.67	0.67	0.29	2.5	0.01	-0.15	-0.12	2.63	0.68	-0.28	0.72	-0.12	-0.34	-0.28	-0.45	-0.07	-0.29	-0.37	-0.36	-0.29	-0.33	-0.47	-0.43	-0.46	-0.36	-0.35	-0.43	-0.46	-0.28	-0.35	-0.37	-0.38	-0.41	-0.41	-0.39	-0.41	-0.39	-0.4
HAY_BONE_MARROW_CD34_POS_HSC	-0.29	0.57	0.31	0.16	-0.06	-0.24	3.45	0.45	0.78	-0.11	0.65	0.46	0.88	0.12	3.13	0.89	-0.12	-0.23	3.3	1.69	-0.25	-0.13	-0.07	-0.22	-0.31	-0.29	-0.03	-0.34	-0.25	-0.08	-0.21	-0.32	-0.37	-0.42	-0.43	-0.39	-0.34	-0.4	-0.4	-0.39	-0.32	-0.39	-0.4	-0.39	-0.39	-0.37	-0.36	-0.39	-0.39
DESCARTES_FETAL_ADRENAL_STROMAL_CELLS	0.53	0.06	1.83	0.28	-0.14	-0.36	-0.2	1.98	1.46	1.17	0.51	-0.19	-0.17	-0.38	3.07	0.04	-0.19	-0.2	2.35	2.78	0.7	-0.38	0.05	-0.16	0.04	-0.39	-0.23	-0.33	-0.28	-0.16	-0.35	-0.35	-0.43	-0.49	-0.45	-0.45	-0.38	-0.4	-0.42	-0.48	-0.45	-0.41	-0.31	-0.4	-0.46	-0.44	-0.42	-0.46	-0.43
GAUTAM_EYE_IRIS_CILIARY_BODY_COL9A1_HIGH_CILIARY_BODY_CELLS	0.44	0.16	0.52	0.8	0.29	-0.1	0.5	2.19	2.17	0.72	1	0.22	0.55	0.42	4.35	0.53	-0.21	-0.28	3.23	2.49	1.23	0.13	1.2	-0.28	0.33	-0.15	0.53	-0.45	-0.36	-0.2	-0.12	-0.27	-0.53	-0.42	-0.32	-0.41	-0.37	-0.41	-0.33	-0.39	-0.46	-0.49	-0.44	-0.52	-0.5	-0.36	-0.43	-0.45	-0.47
BUSSLINGER_ESOPHAGEAL_LATE_SUPRABASAL_CELLS	0.03	0.33	0.24	1.58	-0.04	-0.19	0.86	0.24	0.29	-0.13	0.32	1.48	2.11	-0.03	3.21	2.48	0.72	0.48	7.39	8.15	2.07	0.54	0.92	0.02	-0.45	-0.24	0.06	-0.28	0.19	-0.4	-0.12	-0.37	-0.44	-0.33	-0.28	-0.3	-0.44	-0.4	-0.47	-0.37	-0.41	-0.5	-0.44	-0.43	-0.45	-0.44	-0.43	-0.43	-0.4
DURANTE_ADULT_OLFACTORY_NEUROEPITHELIUM_RESPIRATORY_COLUMNAR_CELLS	-0.37	0.74	0.14	-0.18	-0.13	-0.29	0.03	-0.09	-0.07	-0.1	-0.05	0.29	-0.01	0.06	2.16	-0.05	0.73	0.31	5.04	4.99	0.91	-0.18	0.81	-0.27	-0.23	-0.2	0.31	-0.3	-0.12	-0.33	-0.29	-0.32	-0.36	-0.38	-0.39	-0.44	-0.41	-0.4	-0.4	-0.47	-0.43	-0.48	-0.44	-0.44	-0.48	-0.43	-0.4	-0.43	-0.42
DURANTE_ADULT_OLFACTORY_NEUROEPITHELIUM_RESPIRATORY_HORIZONTAL_BASAL_CELLS	-0.39	0.51	0.04	1.55	-0.14	-0.26	0.09	-0.09	-0.09	-0.09	0.01	0	-0.01	0.02	2.66	0.19	0.88	0.41	5.51	5.12	0.93	0.09	1.24	-0.29	-0.22	-0.32	0.48	-0.22	-0.18	-0.32	-0.37	-0.35	-0.35	-0.37	-0.38	-0.44	-0.45	-0.44	-0.36	-0.46	-0.41	-0.48	-0.43	-0.41	-0.45	-0.41	-0.41	-0.42	-0.41
DESCARTES_FETAL_STOMACH_SQUAMOUS_EPITHELIAL_CELLS	-0.21	0.55	-0.25	-0.33	-0.21	-0.38	-0.11	0.2	0.12	-0.08	-0.12	0.13	0.54	-0.21	0.88	0.98	1.52	0.98	3.97	3.04	1.33	-0.26	1.25	-0.29	-0.35	-0.28	-0.2	-0.24	-0.26	0.16	-0.25	-0.39	-0.25	-0.34	-0.3	-0.29	-0.33	-0.32	-0.4	-0.3	-0.38	-0.47	-0.36	-0.4	-0.38	-0.39	-0.37	-0.39	-0.38
DESCARTES_MAIN_FETAL_SQUAMOUS_EPITHELIAL_CELLS	-0.22	0.28	-0.13	0.03	-0.12	-0.37	0.26	0.39	0.23	-0.11	0.01	0.7	0.34	-0.23	2.27	0.57	1.62	0.93	5.03	5.59	2.78	0.13	2.23	-0.18	-0.22	-0.34	0.04	-0.24	-0.42	-0.19	-0.35	-0.37	-0.43	-0.43	-0.37	-0.36	-0.35	-0.36	-0.35	-0.33	-0.41	-0.27	-0.36	-0.35	-0.45	-0.42	-0.42	-0.4	-0.4
BUSSLINGER_DUODENAL_MATURE_ENTEROCYTES	-0.38	0.98	0.94	1.71	0.37	0.13	0.43	0.27	0.58	-0.11	0.62	2.34	1.2	2.67	6.35	1.56	2.87	2.82	4.29	5.63	1.17	0.17	2.14	-0.13	0.07	-0.01	0.01	-0.13	0.08	-0.26	-0.22	-0.33	-0.25	-0.24	-0.22	-0.19	-0.48	-0.44	-0.37	-0.43	-0.37	-0.38	-0.47	-0.46	-0.47	-0.48	-0.46	-0.53	-0.51
TRAVAGLINI_LUNG_NEUTROPHIL_CELL	-0.03	0.54	0.91	2	0.25	0.04	0.96	0.37	0.41	0.04	1.45	1.32	1.17	0.2	4.4	1.82	2.29	2.32	4.69	5.08	0.45	0.22	1.4	0.09	-0.42	-0.33	0.03	-0.4	-0.03	-0.13	-0.21	-0.31	-0.56	-0.37	-0.26	-0.45	-0.5	-0.39	-0.34	-0.39	-0.37	-0.42	-0.34	-0.4	-0.41	-0.45	-0.39	-0.36	-0.43
AIZARANI_LIVER_C23_KUPFFER_CELLS_3	-0.02	0.59	2.13	0.77	0.04	-0.19	0.11	0.13	0.34	-0.1	1	0.63	0.74	0.1	5.43	1	2.35	2.29	5.27	5.81	1.12	1.61	2.18	0.01	-0.32	-0.18	-0.06	-0.14	-0.28	-0.3	-0.3	-0.33	-0.43	-0.34	-0.31	-0.34	-0.38	-0.37	-0.37	-0.29	-0.35	-0.38	-0.4	-0.36	-0.42	-0.35	-0.37	-0.41	-0.38
CUI_DEVELOPING_HEART_C6_EPICARDIAL_CELL	-0.11	0.57	0.86	0.27	-0.13	-0.19	0.02	0.41	0.22	-0.02	0.13	0.66	0.31	0.02	3.68	0.42	1.6	1.54	4.29	4.54	0.13	0.38	0.89	-0.29	-0.34	-0.29	0.31	-0.28	-0.35	-0.22	-0.34	-0.37	-0.47	-0.46	-0.46	-0.4	-0.42	-0.51	-0.38	-0.44	-0.42	-0.43	-0.44	-0.44	-0.44	-0.45	-0.45	-0.43	-0.44
DESCARTES_FETAL_EYE_CORNEAL_AND_CONJUNCTIVAL_EPITHELIAL_CELLS	-0.31	0.72	1.15	-0.11	-0.2	-0.26	0.11	-0.26	-0.19	-0.29	-0.15	0.33	0.16	0	2.91	1.08	1.33	1.22	4.09	4.33	1.16	0.36	1.25	-0.15	-0.12	-0.29	0.37	-0.3	-0.29	-0.28	-0.29	-0.37	-0.39	-0.39	-0.37	-0.32	-0.38	-0.38	-0.3	-0.38	-0.35	-0.38	-0.37	-0.38	-0.39	-0.37	-0.35	-0.37	-0.36
CUI_DEVELOPING_HEART_C7_MAST_CELL	-0.34	0.35	1.74	0.42	-0.18	-0.24	0.64	-0.09	-0.25	-0.23	0.62	0.11	0.02	-0.22	5.16	0.23	2.6	2.64	4.52	5.11	0.35	-0.06	1.9	0.04	-0.47	-0.32	-0.08	-0.45	-0.31	-0.49	-0.32	-0.36	-0.55	-0.45	-0.44	-0.4	-0.36	-0.44	-0.29	-0.25	-0.3	-0.39	-0.33	-0.42	-0.45	-0.51	-0.4	-0.33	-0.44
FAN_EMBRYONIC_CTX_BRAIN_MYELOID	0.01	-0.03	0.44	0.5	0.02	-0.13	0.48	0.18	0.36	-0.06	0.53	0.15	0.26	0.43	4.1	1.36	2.7	2.62	7.65	8.23	1.05	1.59	2.46	0.24	-0.05	-0.31	0.01	-0.19	-0.27	0.58	-0.32	-0.23	-0.26	-0.4	-0.32	-0.47	-0.37	-0.38	-0.36	-0.35	-0.38	-0.38	-0.32	-0.4	-0.36	-0.41	-0.36	-0.31	-0.38
FAN_EMBRYONIC_CTX_BIG_GROUPS_BRAIN_IMMUNE	-0.2	0.2	1.35	0.63	0.01	0.09	0.25	0.54	0.74	-0.04	0.89	0.63	0.43	0.09	3.48	1.04	2.93	2.85	6.36	6.43	0.7	1.2	3.24	0.05	-0.39	-0.45	-0.02	-0.26	0.1	0.05	-0.49	-0.28	-0.55	-0.41	-0.4	-0.46	-0.48	-0.47	-0.47	-0.47	-0.47	-0.53	-0.37	-0.49	-0.49	-0.46	-0.39	-0.39	-0.46
FAN_OVARY_CL12_T_LYMPHOCYTE_NK_CELL_2	-0.14	1.14	1.7	0.83	0.05	0.33	0.55	0.95	0.98	-0.04	1.41	1.1	0.75	0	3.89	0.99	2.76	2.81	6.3	7.04	0.73	1.1	2.19	-0.11	-0.21	-0.36	-0.15	-0.18	-0.12	-0.41	-0.13	-0.38	-0.45	-0.43	-0.39	-0.33	-0.5	-0.51	-0.35	-0.4	-0.45	-0.46	-0.44	-0.44	-0.44	-0.38	-0.44	-0.46	-0.45
FAN_OVARY_CL4_T_LYMPHOCYTE_NK_CELL_1	0.06	0.19	2.01	0.77	0.13	0.17	1.32	0.91	1.23	-0.16	1.56	0.64	0.21	-0.17	4.37	1.05	2.59	2.52	5.87	6.24	0.6	0.7	2.37	-0.14	-0.5	-0.46	-0.06	-0.28	-0.01	-0.16	-0.4	-0.27	-0.43	-0.41	-0.45	-0.47	-0.53	-0.53	-0.35	-0.4	-0.47	-0.47	-0.43	-0.43	-0.49	-0.51	-0.44	-0.39	-0.42
ZHENG_CORD_BLOOD_C2_PUTATIVE_BASOPHIL_EOSINOPHIL_MAST_CELL_PROGENITOR	0.42	0.04	0.88	0.48	-0.19	-0.26	1.02	0.68	0.54	0.02	1.12	0.11	0.81	0.16	4.33	2.09	2.48	2.47	5.05	5.05	0.65	1.53	2.51	0.12	-0.41	-0.26	-0.2	-0.26	-0.15	-0.32	-0.28	-0.26	-0.39	-0.41	-0.28	-0.41	-0.4	-0.34	-0.35	-0.34	-0.39	-0.46	-0.29	-0.39	-0.3	-0.5	-0.39	-0.34	-0.38
MENON_FETAL_KIDNEY_10_IMMUNE_CELLS	-0.3	0.41	1.43	0.19	-0.13	-0.21	0.2	0.43	0.97	0.1	0.67	0.58	0.97	-0.08	2.92	1.04	2.38	2.43	4.19	4.1	0.64	1.35	3.11	-0.1	-0.44	-0.43	-0.17	-0.41	-0.11	-0.39	-0.04	-0.34	-0.55	-0.43	-0.4	-0.45	-0.48	-0.47	-0.5	-0.44	-0.53	-0.47	-0.48	-0.42	-0.49	-0.43	-0.49	-0.49	-0.48
CUI_DEVELOPING_HEART_C5_VALVAR_CELL	-0.07	-0.08	-0.03	-0.24	-0.3	-0.33	0.33	0.98	1.61	0.25	1.67	1.66	1.6	0.35	5.52	1.32	2.2	2.18	4.03	5.02	0.7	0.98	2.28	0.6	-0.22	-0.3	-0.28	-0.3	-0.06	0.36	0.02	-0.37	-0.39	-0.3	-0.47	-0.36	-0.44	-0.46	-0.44	-0.42	-0.39	-0.57	-0.41	-0.47	-0.51	-0.47	-0.47	-0.46	-0.48
TRAVAGLINI_LUNG_CLASSICAL_MONOCYTE_CELL	-0.29	0.52	0.35	0.38	0.28	0.06	0.49	0.65	1.27	1.37	2.53	1.22	1.08	-0.2	5.12	1.43	2.39	2.37	3.94	4.87	1.11	1.21	2.62	0.15	-0.21	-0.3	-0.14	-0.19	0.02	-0.41	-0.17	-0.33	-0.38	-0.34	-0.26	-0.3	-0.39	-0.34	-0.37	-0.44	-0.26	-0.46	-0.4	-0.4	-0.42	-0.35	-0.41	-0.45	-0.44
GAUTAM_EYE_CORNEA_ELF3_HIGH_EPITHELIAL_CELLS	-0.19	0.01	-0.02	0.15	-0.01	0.06	-0.09	1.4	1.5	-0.02	1.64	0.77	1.59	-0.04	3.91	1.3	2.58	2.64	4.6	6.09	0.81	1.91	2.77	-0.09	-0.07	-0.32	-0.09	-0.25	-0.3	-0.08	0.06	-0.32	-0.51	-0.42	-0.27	-0.33	-0.32	-0.49	-0.47	-0.38	-0.26	-0.55	-0.39	-0.43	-0.55	-0.42	-0.44	-0.42	-0.44
RUBENSTEIN_SKELETAL_MUSCLE_SATELLITE_CELLS	0.03	-0.23	0.04	0.2	0.22	0.02	0.2	0.43	0.49	-0.16	0.57	0.6	0.8	0.47	3.95	1.13	1.69	1.7	3.9	4.51	1.02	0.19	1.16	0.74	0.95	-0.05	0.11	-0.29	-0.07	0.22	-0.02	-0.33	-0.46	-0.46	-0.37	-0.39	-0.57	-0.39	-0.46	-0.34	-0.46	-0.53	-0.49	-0.4	-0.44	-0.48	-0.46	-0.41	-0.47
BUSSLINGER_DUODENAL_BCHE_CELLS	0.22	0.36	-0.08	-0.29	-0.34	-0.32	0.85	0.06	-0.06	0.08	0.02	0.33	1.4	0.1	3.44	1.41	3.46	3.49	5.06	6.19	1.33	1.35	1.76	0.5	1.02	-0.19	0.15	-0.22	0.35	0.17	-0.31	-0.33	-0.46	-0.41	-0.32	-0.24	-0.45	-0.32	-0.45	-0.32	-0.31	-0.38	-0.39	-0.38	-0.37	-0.29	-0.25	-0.34	-0.36
VANGURP_PANCREATIC_DELTA_CELL	-0.09	-0.12	0.48	0.47	-0.18	-0.21	0.94	0.29	1.17	-0.07	0.48	0.34	0.33	0.47	1.96	0.71	3.28	3.31	3.55	4.62	1.57	0.13	1.57	-0.02	-0.16	-0.33	0.13	-0.11	-0.07	-0.08	-0.22	-0.32	-0.25	-0.32	-0.2	-0.45	-0.42	-0.45	-0.38	-0.42	-0.45	-0.5	-0.42	-0.36	-0.52	-0.47	-0.42	-0.41	-0.44
FAN_OVARY_CL2_PUTATIVE_EARLY_ATRETIC_FOLLICLE_THECAL_CELL_1	-0.26	-0.25	-0.22	-0.24	-0.06	0.08	0.38	0.03	0.11	-0.14	0.18	0.86	0.32	0.18	3.42	1.1	2.23	2.23	2.82	3.28	0.57	1.59	2.45	0.9	-0.42	-0.5	-0.06	-0.23	0.1	0.41	0.18	-0.29	-0.46	-0.37	-0.39	-0.46	-0.43	-0.23	-0.33	-0.28	-0.39	-0.48	-0.36	-0.41	-0.45	-0.51	-0.36	-0.39	-0.38
ZHENG_CORD_BLOOD_C3_MEGAKARYOCYTE_ERYTHROID_PROGENITOR	-0.18	-0.19	-0.09	0.27	0	-0.17	0.45	2.1	3.25	-0.03	0.11	0.46	0.6	-0.1	3.7	1.65	2.8	2.8	4.42	4.17	0.63	0.27	1.64	-0.25	-0.1	-0.22	-0.19	-0.3	-0.17	0.11	-0.22	-0.31	-0.28	-0.39	-0.35	-0.26	-0.34	-0.41	-0.25	-0.37	-0.38	-0.38	-0.38	-0.32	-0.35	-0.36	-0.36	-0.34	-0.39
AIZARANI_LIVER_C31_KUPFFER_CELLS_5	-0.28	0.34	0.67	0.67	-0.11	-0.28	1.06	0.5	1.07	0	1.1	0.69	1.1	-0.28	6.12	0.82	0.12	0.07	4.67	4.97	0.29	-0.05	0.26	0.06	-0.34	-0.3	0.52	-0.3	0.06	0.08	-0.3	-0.28	-0.49	-0.5	-0.36	-0.41	-0.3	-0.4	-0.27	-0.42	-0.35	-0.58	-0.43	-0.43	-0.45	-0.42	-0.4	-0.43	-0.45
BUSSLINGER_DUODENAL_DIFFERENTIATING_STEM_CELLS	-0.06	0.39	0.16	0.13	0.14	-0.07	0.26	0.3	0.3	0.15	0.85	0.44	0.45	0.21	4.07	1.09	-0.19	0.02	3.29	3.7	0.09	0.46	0.44	-0.15	0.59	-0.08	0.59	-0.34	0.07	0.15	0.01	-0.32	-0.34	-0.35	-0.27	-0.2	-0.27	-0.34	-0.11	-0.28	-0.31	-0.36	-0.26	-0.25	-0.32	-0.17	-0.21	-0.26	-0.31
BUSSLINGER_DUODENAL_TRANSIT_AMPLIFYING_CELLS	-0.1	0.42	0.33	0.26	0.12	-0.02	0.55	0.1	0.28	0.01	0.41	0.03	0.09	0.19	3	0.58	-0.18	-0.18	3.07	2.94	0.02	0.05	0.6	-0.3	0.12	-0.14	0.52	-0.31	-0.05	0.14	-0.25	-0.28	-0.27	-0.32	-0.25	-0.29	-0.33	-0.32	-0.24	-0.31	-0.34	-0.36	-0.32	-0.29	-0.32	-0.18	-0.25	-0.33	-0.37
CUI_DEVELOPING_HEART_C1_5TH_WEEK_CARDIAC_CELLS	-0.09	0.3	0.45	-0.14	-0.26	-0.36	-0.08	0.25	0.6	-0.07	0.05	0.57	0.24	0.64	4.87	0.39	-0.23	-0.29	3.42	4.09	0.18	-0.06	1.78	-0.39	-0.27	-0.07	1.49	-0.04	-0.16	-0.13	-0.23	-0.36	-0.53	-0.48	-0.38	-0.45	-0.48	-0.45	-0.54	-0.5	-0.48	-0.51	-0.45	-0.48	-0.43	-0.44	-0.44	-0.44	-0.49
DURANTE_ADULT_OLFACTORY_NEUROEPITHELIUM_SUSTENTACULAR_CELLS	-0.29	0.51	-0.09	-0.37	-0.35	-0.4	1.8	-0.01	-0.3	-0.33	-0.03	0.41	0.54	0.45	3.75	2.05	-0.3	-0.42	3.97	4.1	-0.33	-0.1	0.37	-0.36	0.06	-0.36	0.43	-0.35	-0.35	-0.08	-0.28	-0.38	-0.24	-0.4	-0.33	-0.33	-0.41	-0.4	-0.39	-0.44	-0.38	-0.37	-0.39	-0.4	-0.35	-0.38	-0.35	-0.41	-0.36
DESCARTES_MAIN_FETAL_EPICARDIAL_FAT_CELLS	-0.25	-0.2	-0.35	-0.18	-0.23	-0.3	-0.39	-0.28	-0.29	-0.36	0.49	1.89	0.84	0.23	4.29	0.33	1.1	0.77	3.96	5.63	-0.01	-0.38	0.51	-0.28	-0.3	-0.23	-0.24	-0.27	-0.29	-0.26	-0.2	-0.31	-0.35	-0.37	-0.31	-0.35	-0.38	-0.41	-0.38	-0.23	-0.39	-0.4	-0.32	-0.34	-0.29	-0.39	-0.41	-0.4	-0.41
AIZARANI_LIVER_C18_NK_NKT_CELLS_5	0.04	0.05	0.36	0.95	0.39	0.01	0.19	0.36	0.73	0.12	0.86	2.18	2.22	0.71	7.53	0.9	0.13	0.19	4.71	7.75	1.24	-0.01	0.66	0.16	-0.24	0.02	0.09	-0.18	0.15	0.55	-0.49	-0.25	-0.1	-0.31	-0.11	-0.36	-0.43	-0.27	-0.25	-0.38	-0.25	-0.42	-0.35	-0.37	-0.33	-0.37	-0.34	-0.46	-0.39
FAN_EMBRYONIC_CTX_ASTROCYTE_1	-0.11	-0.09	0.15	1.62	0.31	-0.08	1.37	0.41	1.08	0.24	0.79	2.58	1.68	0.4	5.99	0.63	0.37	0.27	3.77	4.95	0.2	0.08	0.9	0.11	-0.19	-0.14	0.43	-0.18	-0.23	-0.1	-0.2	-0.32	-0.32	-0.35	-0.26	-0.22	-0.24	-0.4	-0.4	-0.19	-0.34	-0.48	-0.32	-0.28	-0.32	0.01	-0.33	-0.29	-0.27
TRAVAGLINI_LUNG_MYOFIBROBLAST_CELL	0.07	-0.24	0.14	0.83	0.02	-0.12	0.25	0.29	1.15	-0.03	1.26	0.79	3.13	0.51	5.6	0.44	1.16	0.77	5	4.5	0.36	-0.1	1.06	-0.01	-0.18	-0.25	0.34	-0.01	0.02	-0.21	0.06	-0.26	-0.32	-0.33	-0.17	-0.23	-0.34	-0.36	-0.42	-0.3	-0.33	-0.43	-0.4	-0.34	-0.44	-0.43	-0.34	-0.35	-0.39
BUSSLINGER_DUODENAL_TUFT_CELLS	0.07	0.3	-0.15	0.45	-0.2	-0.1	0.52	0.91	1.33	0.32	0.45	1.12	2.03	0.33	4.12	1.17	-0.19	-0.18	3.61	3.01	-0.15	1.31	0.96	-0.32	-0.28	-0.37	-0.05	-0.28	-0.13	-0.23	-0.36	-0.34	-0.36	-0.41	-0.35	-0.35	-0.36	-0.3	-0.35	-0.35	-0.33	-0.37	-0.33	-0.34	-0.37	-0.24	-0.34	-0.35	-0.33
DESCARTES_MAIN_FETAL_EXTRAVILLOUS_TROPHOBLASTS	-0.19	0.58	-0.12	0.1	-0.21	-0.12	0.43	-0.04	0.19	-0.09	0.37	0.73	1.03	0	3.41	0.36	-0.27	-0.25	3.18	2.95	0.12	0.94	0.32	-0.26	-0.34	-0.31	-0.09	-0.29	-0.24	-0.18	-0.34	-0.32	-0.37	-0.36	-0.34	-0.29	-0.29	-0.38	-0.37	-0.36	-0.32	-0.41	-0.35	-0.37	-0.37	-0.34	-0.34	-0.34	-0.33
BUSSLINGER_GASTRIC_X_CELLS	-0.18	0.03	0.22	0.71	-0.27	-0.29	0.62	1.2	2.15	0.15	1.25	0.9	2.76	0.88	5.85	2.06	0.26	0.42	4.34	4.51	0.91	0.17	0.45	-0.23	0.84	-0.45	-0.03	-0.16	0.08	0.03	-0.54	-0.32	-0.61	-0.52	-0.42	-0.42	-0.48	-0.36	-0.33	-0.48	-0.36	-0.5	-0.45	-0.52	-0.4	-0.33	-0.29	-0.34	-0.4
TRAVAGLINI_LUNG_SEROUS_CELL	0.74	0.98	0.4	0.33	0.12	0.27	0.23	1.36	1.12	-0.03	0.21	0.6	1.54	0.28	5.09	2.54	-0.08	-0.21	3.47	4.22	0.29	0	0.4	-0.27	0.13	-0.29	0.36	-0.32	-0.28	-0.28	-0.37	-0.25	-0.51	-0.48	-0.36	-0.39	-0.38	-0.28	-0.26	-0.43	-0.47	-0.48	-0.46	-0.48	-0.5	-0.45	-0.36	-0.42	-0.45
GAUTAM_EYE_CORNEA_CONJUNCTIVAL_CELLS	-0.13	0.04	0.58	0.02	-0.18	-0.05	0.27	0.27	0.71	-0.14	0.6	0.75	0.91	-0.14	2.02	1.12	-0.29	-0.25	1.99	1.55	-0.19	0.04	-0.08	-0.28	-0.4	-0.24	-0.18	-0.37	-0.34	-0.21	-0.28	-0.35	-0.44	-0.47	-0.25	-0.29	-0.35	-0.42	-0.33	-0.35	-0.38	-0.4	-0.32	-0.39	-0.4	-0.38	-0.33	-0.36	-0.36
FAN_EMBRYONIC_CTX_BRAIN_NAIVE_LIKE_T_CELL	-0.09	-0.03	0.17	0.49	0.14	0.14	1.32	0.87	1.1	-0.09	1.69	1.02	0.63	0.63	4.86	1.05	-0.19	-0.28	3.17	5.87	0.82	2.17	1.13	0	1.48	0.19	-0.04	-0.26	0.02	-0.81	0.02	-0.22	-0.53	-0.42	-0.51	-0.51	-0.46	-0.4	-0.34	-0.5	-0.37	-0.49	-0.26	-0.46	-0.4	-0.52	-0.39	-0.43	-0.43
FAN_OVARY_CL10_PUTATIVE_EARLY_ATRESIA_GRANULOSA_CELL	0.04	0.12	0.84	0.51	0.19	0.05	0.96	1.19	1.8	0.38	1.78	0.87	0.73	0.77	5.31	1.06	0.7	0.29	4.17	4.72	0.89	0.51	1.23	-0.49	1.42	0.1	1.42	0.22	0.24	0.7	-0.29	-0.29	-0.58	-0.46	-0.43	-0.44	-0.59	-0.57	-0.33	-0.38	-0.44	-0.52	-0.46	-0.55	-0.56	-0.36	-0.42	-0.4	-0.52
GAUTAM_EYE_IRIS_CILIARY_BODY_MELANOCYTES	-0.09	0.35	0.1	0.4	-0.08	0.02	1.43	1.55	1.53	0.32	2.03	0.67	0.78	0.08	4.27	0.72	-0.14	-0.1	3.51	4.11	-0.01	1.1	0.35	-0.41	0.18	-0.43	-0.07	-0.46	-0.27	0.45	-0.25	-0.31	-0.49	-0.48	-0.4	-0.43	-0.39	-0.5	-0.32	-0.4	-0.48	-0.51	-0.55	-0.46	-0.49	-0.42	-0.45	-0.46	-0.5
TRAVAGLINI_LUNG_BASAL_CELL	-0.29	-0.28	-0.13	0.82	0.24	0.03	0.73	1.1	1.32	0.38	2.15	0.5	1.05	0.44	5.07	1.04	0.6	0.27	4.14	4.15	1.6	0.98	1.07	-0.12	-0.08	-0.31	0.21	-0.34	-0.14	-0.34	-0.22	-0.29	-0.43	-0.36	-0.39	-0.4	-0.39	-0.32	-0.38	-0.37	-0.33	-0.41	-0.31	-0.38	-0.41	-0.38	-0.32	-0.38	-0.38
TRAVAGLINI_LUNG_BASOPHIL_MAST_1_CELL	-0.11	0.38	1.75	0.84	-0.04	-0.21	0.73	1.81	2.25	0.06	2.25	0.77	1.25	2.65	4.27	0.81	0	0.02	4.63	5.89	0.12	0.19	1.02	0.08	0.99	0.42	0.29	-0.17	0.12	0.16	-0.03	-0.35	-0.35	-0.17	-0.24	-0.32	-0.37	-0.37	-0.25	-0.26	-0.39	-0.4	-0.36	-0.38	-0.39	-0.34	-0.28	-0.33	-0.34
DESCARTES_FETAL_INTESTINE_INTESTINAL_EPITHELIAL_CELLS	-0.14	0.03	0.85	0.13	-0.11	-0.36	1.28	0.48	0.47	-0.13	0.22	1.2	1.77	0.15	2	0.93	0.08	-0.07	3.41	6.47	-0.26	1.04	2.25	0.16	-0.1	-0.28	-0.29	-0.31	-0.13	-0.12	-0.21	-0.31	-0.42	-0.51	-0.42	-0.37	-0.29	-0.4	-0.24	-0.41	-0.32	-0.42	-0.45	-0.33	-0.43	-0.3	-0.35	-0.36	-0.36
GAUTAM_EYE_CHOROID_SCLERA_MELANOCYTES	-0.08	0.39	0.2	-0.04	-0.28	-0.3	0.77	0.41	0.68	-0.15	0.49	0.68	0.79	0.12	1.3	0.66	-0.12	-0.16	1.7	3.43	-0.18	0.3	0.43	-0.36	-0.19	-0.2	-0.11	-0.36	0.19	-0.04	-0.3	-0.28	-0.45	-0.33	-0.45	-0.5	-0.53	-0.4	-0.42	-0.35	-0.34	-0.26	-0.34	-0.44	-0.51	-0.35	-0.39	-0.44	-0.49
DESCARTES_FETAL_CEREBRUM_LIMBIC_SYSTEM_NEURONS	-0.27	-0.1	-0.23	-0.26	-0.16	-0.03	0.45	0.77	0.75	0.03	0.32	0.24	-0.13	0.05	2.35	0.74	0	0.06	2.38	2.36	0.16	-0.11	-0.01	-0.45	-0.27	0.01	-0.32	-0.33	-0.37	-0.44	-0.35	-0.4	-0.11	-0.2	-0.25	-0.26	-0.41	-0.17	-0.33	-0.32	-0.14	-0.33	-0.32	-0.33	-0.28	-0.26	-0.33	-0.37	-0.34
BUSSLINGER_DUODENAL_EARLY_IMMATURE_ENTEROCYTES	-0.21	1.06	0.36	0.13	0.06	-0.02	1.66	1.05	0.46	0.21	0.5	0.51	0.56	0.13	2.34	0.7	-0.17	-0.11	4.5	4.71	0.34	-0.05	0.02	0.27	0.46	-0.23	0.49	-0.33	0	-0.39	-0.15	-0.34	-0.56	-0.39	-0.41	-0.34	-0.44	-0.47	-0.27	-0.42	-0.35	-0.51	-0.43	-0.42	-0.56	-0.34	-0.4	-0.42	-0.48
FAN_EMBRYONIC_CTX_EX_2_EXCITATORY_NEURON	-0.16	1.96	0.3	0.16	-0.02	0.16	2.56	1.8	2.1	0.38	1.2	0.68	0.94	0.01	4.51	0.6	0.22	-0.04	5.06	6.62	0.16	1.01	0.33	-0.25	0.09	0	-0.39	-0.02	0.29	0.28	0.06	-0.26	-0.21	-0.14	-0.11	-0.18	-0.03	-0.26	-0.32	-0.26	-0.2	-0.33	-0.29	-0.28	-0.37	-0.32	-0.3	-0.16	-0.24
BUSSLINGER_GASTRIC_METALLOTHIONEIN_CELLS	-0.23	0.76	0.6	0.52	0.26	-0.22	1.09	1.91	1.51	-0.06	1.61	0.83	0.55	0.18	2.66	0.23	-0.34	-0.34	4.62	6.2	-0.02	0.01	0.72	-0.07	0.02	-0.15	0.38	-0.35	-0.05	-0.78	-0.39	-0.33	-0.49	-0.36	-0.45	-0.34	-0.39	-0.49	-0.34	-0.3	-0.27	-0.41	-0.4	-0.39	-0.42	-0.36	-0.39	-0.4	-0.44
FAN_OVARY_CL1_GPRC5A_TNFRS12A_HIGH_SELECTABLE_FOLLICLE_STROMAL_CELL	0.07	0.31	0.77	1.39	0.34	0.01	1.8	1.35	1.31	0.47	1.9	1.75	1.29	1.6	2.87	0.47	0.04	-0.08	4.26	7.11	0.72	-0.12	0.34	-0.1	-0.11	-0.13	0.29	-0.19	0.09	0.04	-0.1	-0.29	-0.32	-0.4	-0.31	-0.27	-0.36	-0.46	-0.27	-0.33	-0.37	-0.21	-0.3	-0.26	-0.3	-0.32	-0.34	-0.34	-0.33
AIZARANI_LIVER_C29_MVECS_2	-0.18	0.42	0.68	1.26	0.68	0.18	1.02	1.63	2.05	1.97	2.39	1.13	1.61	1.17	3.91	1.98	0.37	0.18	4.7	6.73	1.76	0.17	0.19	-0.12	-0.26	-0.09	0.09	-0.23	-0.2	0.07	-0.16	-0.32	-0.39	-0.31	-0.31	-0.4	-0.44	-0.47	-0.32	-0.4	-0.35	-0.41	-0.37	-0.37	-0.37	-0.42	-0.36	-0.42	-0.44
RUBENSTEIN_SKELETAL_MUSCLE_PCV_ENDOTHELIAL_CELLS	-0.21	0.08	0.13	0.97	0.37	0.3	1.17	0.98	1.23	0.16	1.31	1.57	1.17	0.5	3.4	0.85	0.49	0.26	3.02	4.44	0.58	0.07	0.58	0.27	-0.18	-0.27	0.09	-0.36	0.1	0.22	-0.28	-0.26	-0.38	-0.25	-0.26	-0.36	-0.33	-0.13	-0.34	-0.28	-0.37	-0.16	-0.37	-0.35	-0.35	-0.37	-0.21	-0.36	-0.4
TRAVAGLINI_LUNG_LIPOFIBROBLAST_CELL	-0.36	0.82	0.91	1.64	0.4	0.23	1.58	1.85	1.43	0.38	1.39	1.83	1.31	0.1	3.92	1.67	0.02	-0.12	4.58	6.07	1.21	0	0.26	-0.1	-0.17	-0.29	0.1	-0.36	-0.15	-0.54	-0.29	-0.24	-0.41	-0.4	-0.37	-0.47	-0.43	-0.43	-0.44	-0.4	-0.27	-0.34	-0.32	-0.44	-0.44	-0.5	-0.42	-0.39	-0.45
AIZARANI_LIVER_C32_MVECS_3	-0.18	-0.01	0.18	0.14	0.22	0.35	0.63	0.66	0.87	0.17	0.79	0.71	1.24	0.12	2.76	1.26	0.07	0.07	3.56	5.26	0.32	-0.09	0.54	0.27	0.02	-0.2	-0.16	-0.32	-0.16	0.33	-0.52	-0.23	-0.05	-0.31	-0.22	-0.46	-0.38	-0.37	-0.43	-0.27	-0.27	-0.28	-0.2	-0.28	-0.26	-0.48	-0.33	-0.33	-0.33
GAUTAM_EYE_IRIS_CILIARY_BODY_MGP_HIGH_FIBROBLASTS	0.51	0	0.42	-0.22	-0.05	-0.19	1.08	0.73	0.72	0.18	1.49	0.31	0.52	-0.05	2.46	1.52	-0.22	-0.06	3.77	4.2	0.64	-0.13	0.96	0.07	-0.11	-0.17	-0.13	-0.28	-0.11	-0.22	-0.15	-0.3	-0.43	-0.29	-0.39	-0.38	-0.41	-0.34	-0.34	-0.33	-0.35	-0.48	-0.37	-0.37	-0.36	-0.37	-0.3	-0.35	-0.39
LAKE_ADULT_KIDNEY_C19_COLLECTING_DUCT_INTERCALATED_CELLS_TYPE_A_MEDULLA	0.13	0.11	0.41	0.1	0.14	-0.03	1.19	1.8	2.38	0.36	1.42	0.41	0.89	0.36	3.28	2.04	0.2	0.08	4.33	5.29	0.54	0.16	0.11	-0.09	0.85	-0.07	-0.03	-0.39	0.13	-0.37	-0.15	-0.32	-0.55	-0.33	-0.4	-0.35	-0.41	-0.39	-0.26	-0.4	-0.49	-0.31	-0.43	-0.34	-0.49	-0.36	-0.34	-0.42	-0.45
LAKE_ADULT_KIDNEY_C10_THIN_ASCENDING_LIMB	0.26	-0.08	0.22	0.16	0.08	-0.01	0.9	1.4	1.92	0.33	1.31	0.38	0.67	0.25	3.7	1.78	1.44	1.34	4.64	5.97	0.68	0.14	0.6	-0.08	0.3	-0.06	-0.03	-0.35	0.11	-0.4	-0.18	-0.28	-0.39	-0.33	-0.27	-0.34	-0.42	-0.41	-0.19	-0.39	-0.36	-0.26	-0.33	-0.28	-0.4	-0.36	-0.32	-0.34	-0.38
LAKE_ADULT_KIDNEY_C18_COLLECTING_DUCT_PRINCIPAL_CELLS_MEDULLA	0.01	0.2	0.09	-0.2	-0.09	-0.16	1.22	1.39	1.69	0.13	0.66	0.45	0.88	0.22	3.02	1.75	1.46	1.33	4.78	5.38	0.81	0.13	0.62	-0.06	0.3	-0.2	0.12	-0.4	0.07	-0.37	-0.21	-0.32	-0.55	-0.33	-0.36	-0.37	-0.46	-0.48	-0.37	-0.42	-0.48	-0.29	-0.39	-0.33	-0.41	-0.43	-0.39	-0.41	-0.42
LAKE_ADULT_KIDNEY_C8_DECENDING_THIN_LIMB	0.22	0.1	0.1	-0.08	0.06	-0.08	0.92	1.67	2.5	0.65	1.39	0.69	1.3	0.08	2.46	1.15	1.43	1.31	4.73	5.56	0.98	0.12	1.06	-0.02	0.23	-0.15	-0.01	-0.36	0.05	-0.5	-0.08	-0.32	-0.45	-0.33	-0.41	-0.37	-0.38	-0.43	-0.31	-0.37	-0.42	-0.35	-0.35	-0.31	-0.4	-0.4	-0.35	-0.33	-0.4
LAKE_ADULT_KIDNEY_C9_THIN_ASCENDING_LIMB	0.13	-0.09	0.07	-0.06	-0.13	-0.21	0.79	1.55	2.18	0.58	1.14	0.72	1.23	0.2	2.96	1.56	1.3	1.21	3.83	4.83	0.51	0.09	0.77	-0.06	0.32	-0.12	-0.06	-0.38	0.11	-0.36	-0.21	-0.34	-0.43	-0.36	-0.35	-0.34	-0.44	-0.43	-0.25	-0.39	-0.4	-0.35	-0.39	-0.31	-0.4	-0.4	-0.33	-0.36	-0.38
DESCARTES_FETAL_LUNG_SQUAMOUS_EPITHELIAL_CELLS	-0.42	1.34	1.31	-0.31	-0.26	-0.36	0.9	-0.32	-0.33	-0.37	-0.31	0.49	0.41	-0.31	3.06	0.73	0.55	0.26	2.92	4.83	0.61	-0.19	0.37	-0.09	-0.18	-0.37	0.7	-0.35	-0.26	-0.21	-0.31	-0.37	-0.37	-0.48	-0.47	-0.48	-0.49	-0.48	-0.4	-0.43	-0.45	-0.44	-0.47	-0.47	-0.45	-0.39	-0.39	-0.42	-0.43
DESCARTES_FETAL_KIDNEY_URETERIC_BUD_CELLS	-0.32	0.91	0.7	-0.08	-0.22	-0.34	0.82	0.43	0.42	-0.17	-0.01	0.44	0.28	-0.08	1.86	0.38	-0.29	-0.32	2.8	3.48	0.89	-0.11	0.35	-0.32	-0.33	-0.32	0.18	-0.33	-0.38	-0.36	-0.35	-0.32	-0.4	-0.29	-0.32	-0.36	-0.36	-0.38	-0.29	-0.33	-0.33	-0.32	-0.35	-0.35	-0.35	-0.34	-0.35	-0.35	-0.34
TRAVAGLINI_LUNG_ALVEOLAR_EPITHELIAL_TYPE_1_CELL	-0.26	1.4	2.24	-0.06	-0.12	-0.24	0.22	0.32	0.58	-0.05	0.26	1.16	1.39	0.26	2.95	0.61	0.4	0.24	4.29	4.94	0.85	-0.26	1.02	-0.16	-0.26	-0.26	0.67	-0.13	-0.05	-0.1	-0.32	-0.37	-0.48	-0.38	-0.37	-0.42	-0.42	-0.45	-0.37	-0.43	-0.37	-0.4	-0.38	-0.42	-0.42	-0.36	-0.36	-0.39	-0.39
DESCARTES_FETAL_LIVER_MESOTHELIAL_CELLS	-0.27	0.79	1.29	-0.23	-0.26	-0.29	0.4	0.5	0.54	0.02	1.05	1.51	1.06	0.33	4.91	0.6	0.34	0.28	3.94	5.22	0.13	0.43	0.21	-0.1	-0.29	-0.26	0.43	-0.21	-0.3	-0.11	-0.35	-0.38	-0.39	-0.39	-0.4	-0.37	-0.39	-0.42	-0.34	-0.38	-0.39	-0.45	-0.4	-0.4	-0.37	-0.35	-0.37	-0.37	-0.39
DESCARTES_FETAL_SPLEEN_MESOTHELIAL_CELLS	-0.25	0.9	1.07	-0.31	-0.2	-0.27	0.46	0.52	1.06	0.14	0.41	1.81	0.91	0.19	3.94	0.89	0.29	0.33	4.8	4.99	0.37	0.48	0.39	-0.09	-0.36	-0.24	0.31	-0.26	-0.18	-0.2	-0.26	-0.39	-0.43	-0.41	-0.4	-0.37	-0.39	-0.46	-0.38	-0.39	-0.41	-0.44	-0.42	-0.41	-0.4	-0.39	-0.4	-0.4	-0.41
TRAVAGLINI_LUNG_LYMPHATIC_CELL	-0.22	1.04	1.75	0.5	0.15	-0.13	0.9	1.28	1.65	0.07	1.27	1.34	1.08	1.04	5.81	0.78	0.77	0.41	6.26	6.52	2.3	-0.07	0.94	-0.06	-0.39	-0.21	0.37	-0.3	-0.06	-0.16	-0.13	-0.35	-0.46	-0.37	-0.33	-0.38	-0.45	-0.46	-0.36	-0.4	-0.44	-0.5	-0.43	-0.38	-0.48	-0.36	-0.29	-0.43	-0.4
DESCARTES_FETAL_ADRENAL_CSH1_CSH2_POSITIVE_CELLS	-0.33	0.41	0.73	1.28	-0.11	-0.13	0.15	0.08	0.48	-0.06	-0.15	0.44	0.34	0.13	2.4	0.19	-0.13	-0.23	2.46	3.9	0.15	0.35	0.88	-0.25	-0.26	-0.29	0.19	-0.26	-0.32	-0.31	-0.27	-0.32	-0.31	-0.32	-0.31	-0.32	-0.32	-0.38	-0.26	-0.33	-0.3	-0.32	-0.3	-0.29	-0.35	-0.32	-0.34	-0.32	-0.32
TRAVAGLINI_LUNG_MACROPHAGE_CELL	-0.08	1.28	2.25	0.8	0.12	-0.3	0.23	0.78	0.87	0.06	0.46	1.23	0.83	1.61	3.04	0.67	0.22	0.03	4.63	5.8	0.48	0.84	1.38	0.23	-0.08	-0.27	-0.34	-0.29	-0.11	0.13	-0.12	-0.42	-0.5	-0.29	-0.44	-0.45	-0.48	-0.52	-0.48	-0.46	-0.49	-0.5	-0.52	-0.51	-0.53	-0.49	-0.51	-0.53	-0.48
CUI_DEVELOPING_HEART_VALVAR_ENDOTHELIAL_CELL	-0.29	0.54	1.72	0.5	0.41	0.29	0.01	1.76	2.34	0.47	0.63	1.42	1.57	0.55	3.75	0.97	3.08	2.98	5.47	9.03	1.13	0.98	1.93	-0.1	-0.16	-0.33	0.05	-0.15	-0.11	0.21	-0.36	-0.38	-0.4	-0.41	-0.26	-0.46	-0.48	-0.47	-0.45	-0.47	-0.44	-0.47	-0.47	-0.46	-0.47	-0.5	-0.48	-0.49	-0.47
BUSSLINGER_GASTRIC_IMMATURE_PIT_CELLS	-0.33	1.18	0.9	0.09	-0.1	-0.11	1.2	1.3	1.43	0.11	0.5	0.59	0.97	0.02	2.53	0.19	1.57	1.45	5.04	5.14	0.97	-0.04	1.52	-0.1	-0.24	-0.37	0.12	-0.29	-0.2	-0.5	-0.39	-0.37	-0.35	-0.38	-0.46	-0.34	-0.44	-0.46	-0.38	-0.38	-0.37	-0.39	-0.4	-0.43	-0.43	-0.42	-0.4	-0.43	-0.42
BUSSLINGER_GASTRIC_MATURE_PIT_CELLS	-0.28	1.71	1.25	0.71	-0.02	0.15	1.67	1.72	1.36	0.06	1	0.73	0.55	0.13	2.81	0.82	1.87	1.93	5.68	6.08	0.84	0.47	1.28	0.04	-0.17	-0.36	0.49	-0.3	-0.18	-0.33	-0.44	-0.34	-0.35	-0.34	-0.42	-0.4	-0.51	-0.44	-0.44	-0.38	-0.4	-0.37	-0.42	-0.45	-0.49	-0.37	-0.43	-0.44	-0.48
FAN_OVARY_CL16_LYMPHATIC_ENDOTHELIAL_CELL	-0.27	1.86	1.3	1.28	0.47	0.33	1.26	1.19	1.7	0.21	1.84	1.37	1.48	0.96	4.89	0.58	2.57	2.38	6.33	6.97	1.22	-0.16	1.51	0.14	-0.25	-0.33	-0.17	-0.33	0.57	-0.46	-0.09	-0.31	-0.34	-0.35	-0.4	-0.36	-0.5	-0.41	-0.34	-0.42	-0.43	-0.48	-0.37	-0.39	-0.49	-0.49	-0.35	-0.4	-0.4
MENON_FETAL_KIDNEY_6_COLLECTING_DUCT_CELLS	-0.36	1.46	0.84	0.09	0.04	-0.24	0.55	0.09	0.43	-0.21	0.45	1.1	1.24	0.6	3.07	2	1.77	1.78	5.69	4.96	0.59	-0.13	0.94	-0.2	-0.05	-0.4	0.28	-0.37	-0.26	-0.39	-0.23	-0.37	-0.43	-0.4	-0.4	-0.35	-0.43	-0.39	-0.32	-0.4	-0.4	-0.49	-0.42	-0.42	-0.45	-0.41	-0.41	-0.41	-0.39
RUBENSTEIN_SKELETAL_MUSCLE_FAP_CELLS	0.43	0.96	1.72	0.44	-0.23	-0.42	0.37	0.91	1.01	0.05	0.95	2.12	1.84	1.84	2.82	1.14	1.93	1.83	5.89	6.04	0.57	-0.03	1.16	-0.21	-0.28	-0.14	-0.28	-0.26	-0.14	-0.2	-0.17	-0.39	-0.44	-0.35	-0.38	-0.43	-0.47	-0.4	-0.41	-0.44	-0.52	-0.43	-0.46	-0.42	-0.46	-0.47	-0.43	-0.44	-0.42
RUBENSTEIN_SKELETAL_MUSCLE_FBN1_FAP_CELLS	0.03	1.03	1.58	0.23	-0.19	-0.19	0.35	0.88	1.13	0.11	0.79	1.6	1.44	1.14	2.3	0.79	1.46	1.4	4.97	5.46	0.72	0.26	0.83	-0.3	-0.19	-0.3	-0.33	-0.21	-0.21	-0.1	-0.22	-0.41	-0.53	-0.33	-0.42	-0.37	-0.52	-0.54	-0.34	-0.42	-0.39	-0.48	-0.46	-0.4	-0.49	-0.42	-0.49	-0.43	-0.46
AIZARANI_LIVER_C7_EPCAM_POS_BILE_DUCT_CELLS_2	-0.14	0.87	1.3	-0.34	-0.36	-0.35	0.16	0.85	1.28	0.31	0.29	0.91	1.08	0.07	3.42	1.21	0.88	0.88	2.96	4.23	0.89	0.52	1.4	-0.2	-0.22	-0.33	0.58	-0.14	-0.12	-0.31	-0.21	-0.4	-0.42	-0.41	-0.45	-0.31	-0.4	-0.42	-0.39	-0.4	-0.33	-0.41	-0.39	-0.43	-0.43	-0.37	-0.4	-0.38	-0.43
MENON_FETAL_KIDNEY_4_PODOCYTES	0.15	0.52	1.5	-0.02	-0.05	-0.2	0.27	0.79	1.2	0.23	0.85	0.85	1.19	0.1	2.96	0.49	1.18	1.21	2.49	3.75	0.66	0.53	1.12	-0.26	-0.36	-0.32	0.18	-0.24	-0.11	-0.19	-0.18	-0.37	-0.43	-0.43	-0.43	-0.41	-0.39	-0.45	-0.42	-0.41	-0.45	-0.5	-0.44	-0.44	-0.43	-0.39	-0.43	-0.41	-0.43
FAN_OVARY_CL6_PUTATIVE_EARLY_ATRETIC_FOLLICLE_THECAL_CELL_2	-0.11	1.34	2.55	0.65	-0.07	0	0.64	1.19	1.42	0.53	0.6	1.25	1.09	0.61	3.8	0.91	1.18	1.11	2.91	4.89	0.28	0.75	1.46	0.22	-0.47	-0.44	-0.06	-0.36	-0.13	-0.06	-0.3	-0.42	-0.48	-0.45	-0.46	-0.45	-0.48	-0.45	-0.39	-0.41	-0.36	-0.47	-0.43	-0.44	-0.43	-0.5	-0.45	-0.45	-0.45
FAN_OVARY_CL14_MATURE_SMOOTH_MUSCLE_CELL	-0.1	0.44	1.48	1.57	0.02	0.01	0.72	0.99	1.79	0.32	1.01	1.24	1.53	0.92	4.64	1.41	1.37	1.36	3.11	5.58	1.05	1.35	2.48	-0.18	-0.19	-0.3	0.6	-0.06	-0.11	-0.3	-0.26	-0.37	-0.48	-0.42	-0.46	-0.42	-0.42	-0.46	-0.4	-0.4	-0.37	-0.5	-0.4	-0.41	-0.48	-0.39	-0.4	-0.36	-0.46
AIZARANI_LIVER_C24_EPCAM_POS_BILE_DUCT_CELLS_3	-0.16	0.71	1.07	0.83	-0.27	-0.16	0.44	1.08	1.63	0.36	0.95	0.7	1.18	0.15	3.73	1.25	1.05	1.05	4.3	5.12	0.87	0.66	1.29	-0.04	-0.23	-0.3	0	-0.29	-0.15	-0.29	-0.23	-0.37	-0.32	-0.38	-0.39	-0.3	-0.37	-0.41	-0.29	-0.37	-0.37	-0.39	-0.39	-0.39	-0.4	-0.33	-0.35	-0.37	-0.4
AIZARANI_LIVER_C39_EPCAM_POS_BILE_DUCT_CELLS_4	-0.1	1.12	1.33	1.01	-0.22	-0.2	0.32	0.66	1.1	0.33	0.43	1.07	1.46	0.06	3.17	0.97	1.11	1.15	4.15	4.97	1.18	0.5	1.33	-0.28	-0.33	-0.29	0.33	-0.24	-0.2	-0.36	-0.27	-0.36	-0.35	-0.37	-0.38	-0.31	-0.38	-0.4	-0.34	-0.42	-0.38	-0.39	-0.38	-0.37	-0.4	-0.37	-0.39	-0.39	-0.39
BUSSLINGER_GASTRIC_ISTHMUS_CELLS	0.35	1.42	1.65	1.21	0.11	-0.07	0.82	1.48	1.85	0.28	1.07	1.28	1.58	0.11	3.43	0.84	1.28	1.17	5.25	5.77	0.82	0.47	1.27	-0.11	-0.16	-0.07	0.16	-0.19	-0.12	0.25	-0.21	-0.33	-0.26	-0.31	-0.28	-0.26	-0.35	-0.38	-0.12	-0.43	-0.35	-0.22	-0.39	-0.37	-0.32	-0.25	-0.3	-0.33	-0.34
HAY_BONE_MARROW_NEUTROPHIL	-0.02	0.75	1.52	1.48	0.15	-0.14	0.61	1.4	2.45	0.17	1.28	1.49	1.54	0.2	3.9	1.34	1.94	1.84	5.38	5.64	0.9	0.29	1.72	-0.17	-0.22	-0.26	-0.13	-0.23	-0.21	-0.18	-0.35	-0.4	-0.37	-0.34	-0.28	-0.35	-0.47	-0.45	-0.39	-0.4	-0.42	-0.38	-0.47	-0.38	-0.48	-0.44	-0.45	-0.42	-0.42
FAN_OVARY_CL13_MONOCYTE_MACROPHAGE	-0.16	0.63	1.66	1.28	0.06	-0.03	0.5	0.95	1.35	0.76	1.22	1.56	1.42	1.55	5.32	1.34	1.58	1.53	5.67	6.71	0.56	1.16	2.1	-0.19	-0.3	-0.1	-0.26	-0.28	-0.08	-0.15	-0.14	-0.34	-0.53	-0.34	-0.4	-0.39	-0.48	-0.49	-0.34	-0.46	-0.34	-0.42	-0.48	-0.46	-0.48	-0.4	-0.47	-0.45	-0.45
TRAVAGLINI_LUNG_OLR1_CLASSICAL_MONOCYTE_CELL	0.26	1.21	1.95	1.8	-0.05	-0.24	0.9	1.4	1.71	0.78	1.54	1.93	1.39	1.09	4.26	1.7	1.44	1.3	4.83	6.34	0.81	0.74	1.84	-0.21	-0.39	-0.07	0	-0.24	-0.25	0.08	-0.15	-0.38	-0.47	-0.31	-0.39	-0.38	-0.41	-0.46	-0.22	-0.36	-0.38	-0.33	-0.39	-0.37	-0.41	-0.41	-0.4	-0.37	-0.37
TRAVAGLINI_LUNG_EREG_DENDRITIC_CELL	-0.33	1.6	2.51	1.67	0.13	-0.12	0.6	1.14	1.75	0.82	1.35	1.6	1.77	0.12	5.2	1.77	1.39	1.36	5.12	6.46	0.72	0.97	1.43	-0.27	-0.42	-0.2	-0.07	-0.26	-0.12	-0.41	-0.24	-0.38	-0.51	-0.44	-0.45	-0.35	-0.48	-0.46	-0.34	-0.42	-0.36	-0.39	-0.43	-0.4	-0.48	-0.42	-0.47	-0.42	-0.42
TRAVAGLINI_LUNG_MESOTHELIAL_CELL	-0.33	1.37	2.01	1.7	0.32	0.09	0.78	1.46	1.81	0.42	1.07	1.47	1.17	0.26	5.09	1.76	1.3	1.1	4.6	6.09	0.73	0.58	1.18	-0.07	0.23	-0.22	0.15	-0.37	0.04	0.04	-0.36	-0.33	-0.52	-0.52	-0.4	-0.28	-0.44	-0.44	-0.29	-0.37	-0.31	-0.41	-0.37	-0.36	-0.48	-0.45	-0.32	-0.38	-0.39
FAN_OVARY_CL7_ANGEIOGENIC_ENDOTHELIAL_CELL	-0.07	0.92	1.65	0.63	0.23	0.14	0.63	0.75	1.64	0.09	1.3	2.3	2.22	0.31	3.64	1.17	1.75	1.67	4.38	5.43	0.69	-0.09	1.14	-0.09	-0.43	-0.33	-0.26	-0.32	-0.12	-0.49	-0.08	-0.35	-0.42	-0.47	-0.46	-0.47	-0.47	-0.39	-0.34	-0.43	-0.46	-0.46	-0.4	-0.46	-0.46	-0.48	-0.39	-0.4	-0.47
RUBENSTEIN_SKELETAL_MUSCLE_MYELOID_CELLS	-0.2	0.57	1.81	0.74	0.13	0.17	0.39	0.75	1.19	0.18	1.1	2.02	2.19	0.44	3.19	2.01	1.94	1.99	4.34	5.23	0.46	0.59	1.78	-0.06	-0.21	-0.32	-0.24	-0.32	0.11	-0.15	-0.26	-0.33	-0.4	-0.52	-0.29	-0.3	-0.52	-0.46	-0.34	-0.45	-0.42	-0.34	-0.46	-0.45	-0.54	-0.42	-0.46	-0.49	-0.47
TRAVAGLINI_LUNG_ADVENTITIAL_FIBROBLAST_CELL	0.85	0.58	1.16	1.2	0.08	-0.08	1.14	1.63	2.04	0.43	0.95	2.25	2.21	0.14	4	1.36	1.9	1.83	5.7	6.66	0.9	0.1	0.82	0.1	-0.44	-0.38	0.23	-0.41	-0.13	-0.01	-0.23	-0.34	-0.51	-0.36	-0.33	-0.45	-0.55	-0.46	-0.32	-0.43	-0.4	-0.47	-0.42	-0.41	-0.52	-0.49	-0.41	-0.41	-0.45
TRAVAGLINI_LUNG_CAPILLARY_INTERMEDIATE_2_CELL	-0.04	0.6	1.49	0.59	-0.06	-0.23	0.7	1.13	1.97	0.4	1.1	2.08	2.18	1.21	3.57	0.87	1.54	1.38	3.49	4.33	0.46	0.8	2	-0.15	-0.23	-0.31	-0.29	-0.37	-0.12	-0.29	-0.13	-0.38	-0.32	-0.49	-0.52	-0.42	-0.55	-0.49	-0.38	-0.45	-0.44	-0.45	-0.44	-0.48	-0.46	-0.48	-0.43	-0.43	-0.44
MURARO_PANCREAS_DUCTAL_CELL	-0.34	1.36	1.71	1.06	0.05	-0.24	0.63	1.48	1.98	0.52	1.43	2.04	2.41	0.19	3.79	1.32	0.61	0.55	3.89	5.89	0.69	0.16	0.65	-0.17	-0.26	-0.32	-0.13	-0.33	-0.26	-0.35	-0.24	-0.37	-0.42	-0.33	-0.37	-0.36	-0.43	-0.46	-0.29	-0.37	-0.29	-0.37	-0.36	-0.37	-0.39	-0.32	-0.37	-0.35	-0.38
TRAVAGLINI_LUNG_PROLIFERATING_MACROPHAGE_CELL	-0.08	1.56	2.43	0.71	0.11	-0.14	0.83	1.51	1.81	0.67	1.31	1.88	2.41	0.63	4.24	0.93	0.89	0.75	3.92	5.23	0.34	0.53	0.87	0.03	0.4	0.04	-0.09	-0.38	-0.01	0.09	-0.18	-0.29	-0.43	-0.39	-0.44	-0.39	-0.41	-0.5	-0.3	-0.48	-0.34	-0.41	-0.47	-0.45	-0.44	-0.35	-0.43	-0.4	-0.46
TRAVAGLINI_LUNG_TREM2_DENDRITIC_CELL	-0.1	1.49	2.05	0.28	-0.05	-0.2	0.63	1.42	2.19	0.25	1.08	1.93	1.92	1.35	3.84	0.83	0.98	0.94	4.21	5.31	0.41	0.52	1.15	0.15	-0.22	-0.31	-0.19	-0.29	-0.21	-0.06	-0.24	-0.34	-0.57	-0.38	-0.41	-0.44	-0.51	-0.52	-0.36	-0.47	-0.44	-0.52	-0.53	-0.49	-0.51	-0.41	-0.48	-0.47	-0.49
ZHENG_CORD_BLOOD_C9_GRANULOCYTE_MACROPHAGE_PROGENITOR	0.13	0.39	0.85	0.82	0.12	-0.05	1	2.71	3.29	0.08	1.2	0.29	0.36	0.48	3.29	1.35	0.65	0.29	3.47	5	0.62	1.44	2.97	-0.15	-0.26	-0.08	0.05	-0.12	0.2	0.43	-0.05	-0.3	-0.16	-0.26	-0.17	-0.21	-0.35	-0.39	-0.16	-0.3	-0.32	-0.24	-0.3	-0.28	-0.28	-0.32	-0.16	-0.24	-0.26
ZHONG_PFC_C8_ORG_PROLIFERATING	-0.31	-0.12	0.09	-0.02	-0.08	-0.2	0.21	0.83	1.41	-0.03	0.33	0.09	-0.07	-0.22	1.6	0.93	0.02	-0.14	3.61	3.85	0.12	1.59	1.89	-0.21	-0.07	-0.29	-0.11	-0.31	-0.18	-0.17	-0.07	-0.31	-0.35	-0.37	-0.38	-0.28	-0.27	-0.3	-0.18	-0.4	-0.41	-0.35	-0.34	-0.38	-0.31	-0.3	-0.33	-0.35	-0.41
GAUTAM_EYE_IRIS_CILIARY_BODY_CRYAA_HIGH_CILIARY_BODY_CELLS	-0.42	-0.13	0.06	2.1	0.03	-0.17	0.97	0.23	0.29	-0.14	0.72	2.17	3.7	-0.08	4.34	0.43	-0.12	-0.09	4.53	5.51	0.59	0.02	2.13	-0.3	-0.01	-0.09	-0.14	-0.42	-0.26	-0.63	-0.19	-0.25	-0.34	-0.45	-0.43	-0.38	-0.43	-0.44	-0.48	-0.37	-0.44	-0.33	-0.41	-0.43	-0.41	-0.43	-0.37	-0.46	-0.42
CUI_DEVELOPING_HEART_SMOOTH_MUSCLE_CELL	2.07	0.99	2.61	0.71	0.06	0.55	-0.33	1.06	1.97	0.02	0.02	0.45	0.01	-0.14	2.52	0.24	3.15	3.14	4.04	3.74	0.85	-0.19	1.65	0.05	-0.28	-0.47	0.2	-0.37	-0.27	-0.49	-0.27	-0.37	-0.34	-0.42	-0.3	-0.41	-0.39	-0.38	-0.38	-0.43	-0.31	-0.4	-0.4	-0.35	-0.43	-0.38	-0.43	-0.39	-0.45
TRAVAGLINI_LUNG_CAPILLARY_AEROCYTE_CELL	0.05	0.95	2.44	0.06	-0.37	-0.34	-0.1	0.2	0.88	0.27	-0.1	0	-0.2	-0.1	1.56	0.59	2.41	2.42	3.22	3.13	0.8	1.35	2.38	0.06	-0.29	-0.45	-0.38	-0.34	-0.28	-0.4	-0.35	-0.39	-0.45	-0.5	-0.44	-0.43	-0.47	-0.42	-0.44	-0.41	-0.43	-0.36	-0.43	-0.4	-0.44	-0.41	-0.46	-0.44	-0.46
DESCARTES_FETAL_THYMUS_STROMAL_CELLS	1.42	1.37	2.58	0.07	-0.27	-0.36	0.35	1.59	1.22	0.52	0.71	1.72	0.84	0.28	3.54	-0.16	1.92	1.94	2.12	2.96	0.31	-0.35	1.05	-0.22	-0.41	-0.41	0.26	-0.42	-0.38	-0.52	-0.34	-0.45	-0.44	-0.48	-0.4	-0.49	-0.48	-0.46	-0.44	-0.45	-0.47	-0.46	-0.49	-0.48	-0.49	-0.45	-0.48	-0.47	-0.49
GAUTAM_EYE_IRIS_CILIARY_BODY_CILIARY_BODY_CELLS	-0.27	0.89	1.88	0.84	-0.14	-0.21	0.41	0.91	0.99	0.23	0.21	1.01	1.25	0.02	2.44	0.36	2.38	2.41	2.88	3.64	0.52	-0.12	1.04	-0.26	-0.44	-0.36	0.15	-0.33	-0.33	-0.39	-0.42	-0.34	-0.4	-0.35	-0.33	-0.42	-0.46	-0.44	-0.45	-0.4	-0.43	-0.43	-0.48	-0.38	-0.46	-0.43	-0.47	-0.43	-0.46
LAKE_ADULT_KIDNEY_C11_THIN_ASCENDING_LIMB	-0.31	1.94	3.02	0.11	-0.07	-0.22	0.7	1.58	2.96	0.49	1.14	0.39	0.53	-0.24	2.73	0.36	2.29	2.32	2.67	3.8	1.09	0.02	0.95	0.06	-0.28	-0.36	-0.15	-0.36	-0.24	-0.46	-0.19	-0.41	-0.32	-0.4	-0.4	-0.34	-0.46	-0.48	-0.29	-0.41	-0.42	-0.46	-0.36	-0.43	-0.44	-0.4	-0.43	-0.4	-0.47
LAKE_ADULT_KIDNEY_C7_PROXIMAL_TUBULE_EPITHELIAL_CELLS_S3	-0.08	1.65	2.69	0.16	-0.03	-0.23	0.37	0.72	1.22	0.2	0.79	0.74	1.12	-0.11	2.62	0.25	1.48	1.5	2.08	2.6	0.16	-0.06	1.16	-0.22	-0.35	-0.29	-0.04	-0.3	-0.06	-0.48	-0.29	-0.39	-0.41	-0.45	-0.45	-0.36	-0.46	-0.44	-0.48	-0.39	-0.49	-0.49	-0.45	-0.37	-0.42	-0.4	-0.41	-0.47	-0.49
MENON_FETAL_KIDNEY_9_ENDOTHELIAL_CELLS	0.18	1.8	3.46	0.79	0.23	0.1	0.54	0.68	1.69	0.08	1.03	0.51	0.84	-0.13	1.86	1.23	1.45	1.47	2.74	3.78	0.5	0.94	1.5	-0.14	-0.3	-0.38	0.21	-0.39	-0.25	-0.28	-0.03	-0.33	-0.47	-0.44	-0.39	-0.41	-0.42	-0.37	-0.31	-0.38	-0.35	-0.43	-0.36	-0.42	-0.41	-0.4	-0.36	-0.39	-0.39
HU_FETAL_RETINA_BLOOD	-0.33	0.83	2.45	0.34	0.13	-0.31	-0.06	0.36	0.32	1.03	2.14	1.17	1.63	-0.17	3.86	1.03	2.02	1.95	3.54	4.72	1.11	1.18	2.39	-0.04	0.61	-0.33	0.07	-0.32	-0.04	-0.5	-0.16	-0.37	-0.45	-0.48	-0.47	-0.34	-0.46	-0.51	-0.36	-0.51	-0.44	-0.47	-0.49	-0.5	-0.53	-0.41	-0.44	-0.48	-0.5
LAKE_ADULT_KIDNEY_C12_THICK_ASCENDING_LIMB	0.08	1.2	2.07	1.14	0.8	-0.03	1.27	1.09	1.35	0.48	1.71	1.2	1.39	1.36	4.2	1.16	1.73	1.58	3.62	3.63	0.97	0.62	1.66	-0.15	0.9	0.47	1.07	0.01	0.07	-0.06	-0.33	-0.37	-0.39	-0.19	-0.33	-0.33	-0.48	-0.45	-0.28	-0.4	-0.43	-0.47	-0.4	-0.44	-0.57	-0.43	-0.46	-0.47	-0.53
MENON_FETAL_KIDNEY_7_LOOPOF_HENLE_CELLS_DISTAL	-0.16	1.67	2.68	0.25	0.44	-0.3	0.56	0.87	1.33	0.11	1.1	0.97	0.95	0.07	2.5	0.84	1.53	1.58	2.88	3.18	1.09	0.42	1.49	0.34	1.14	0.39	0.72	-0.03	0.12	0.08	-0.2	-0.29	-0.51	-0.31	-0.41	-0.51	-0.58	-0.63	-0.46	-0.5	-0.47	-0.58	-0.54	-0.55	-0.59	-0.52	-0.54	-0.53	-0.63
MENON_FETAL_KIDNEY_8_CONNECTING_TUBULE_CELLS	-0.24	2.44	2.58	-0.05	0.13	-0.33	0.29	0.92	0.68	-0.22	0.57	1.98	2.22	0.23	2.99	1.49	1.35	1.38	3.11	3.2	0.8	0.27	0.68	-0.15	0.67	-0.16	0.06	-0.36	-0.11	-0.29	-0.28	-0.4	-0.46	-0.44	-0.45	-0.44	-0.51	-0.52	-0.36	-0.49	-0.47	-0.5	-0.47	-0.47	-0.5	-0.47	-0.47	-0.46	-0.5
DURANTE_ADULT_OLFACTORY_NEUROEPITHELIUM_MACROPHAGES	-0.18	0.37	1.05	0.36	0.04	0.06	-0.08	-0.03	0.01	-0.2	0	1.41	0.94	-0.08	1.43	0.54	-0.18	-0.29	1.37	0.97	0.06	-0.08	0.45	0.67	-0.37	-0.46	-0.27	-0.38	0	0.7	-0.03	-0.37	-0.48	-0.3	-0.34	-0.43	-0.52	-0.45	-0.45	-0.52	-0.35	-0.55	-0.47	-0.54	-0.56	-0.5	-0.45	-0.49	-0.52
DESCARTES_MAIN_FETAL_MYELOID_CELLS	-0.31	0.43	1.47	0.37	-0.16	-0.11	-0.04	-0.22	-0.19	0	-0.19	1.52	1.95	0.09	0.2	0.25	0.02	0.05	2.07	3.2	0.17	-0.23	-0.16	-0.14	-0.29	-0.3	-0.25	-0.27	-0.07	1.4	-0.16	-0.3	-0.08	-0.33	-0.25	-0.34	-0.39	-0.4	-0.29	-0.23	-0.21	-0.31	-0.26	-0.35	-0.38	-0.33	-0.34	-0.33	-0.41
GAO_SMALL_INTESTINE_24W_C4_ENTEROCYTE_PROGENITOR_SUBTYPE_2	-0.29	0.58	1.58	-0.14	-0.2	-0.24	-0.25	0.22	0.12	0.28	0.39	1.95	1.08	0.75	0.2	0.27	-0.14	-0.07	1.12	4.24	-0.05	-0.35	0.64	-0.4	-0.32	-0.27	-0.18	-0.33	-0.22	-0.15	-0.24	-0.29	-0.35	-0.39	-0.3	-0.31	-0.35	-0.4	-0.33	-0.38	-0.35	-0.41	-0.39	-0.35	-0.35	-0.34	-0.39	-0.39	-0.4
GAO_LARGE_INTESTINE_24W_C10_ENTEROCYTE	-0.17	0.75	0.63	-0.44	-0.28	-0.25	-0.18	-0.15	0.12	-0.21	-0.16	0.01	0.54	-0.24	0.52	0.28	-0.11	-0.05	1.84	1.29	-0.2	0.04	0.14	-0.35	-0.19	-0.39	0.1	-0.33	-0.45	0.2	-0.43	-0.32	-0.52	-0.33	-0.29	-0.39	-0.44	-0.31	-0.24	-0.35	-0.31	-0.42	-0.29	-0.27	-0.46	-0.31	-0.25	-0.32	-0.35
FAN_EMBRYONIC_CTX_OPC	0.08	1.94	2.88	1.43	-0.09	-0.22	-0.02	1.92	1.86	1.21	1.27	0.77	3.28	0.16	1.73	0.22	0.34	0.11	3.99	4.86	-0.12	-0.18	0.37	-0.31	-0.11	-0.3	-0.11	-0.16	-0.24	-0.03	-0.2	-0.29	-0.43	-0.36	-0.48	-0.23	-0.47	-0.36	-0.37	-0.37	-0.27	-0.45	-0.35	-0.43	-0.41	-0.38	-0.16	-0.37	-0.43
DESCARTES_FETAL_PANCREAS_MESOTHELIAL_CELLS	-0.29	1.15	1.96	0.12	-0.33	-0.41	0.49	0.17	-0.07	0.28	0.48	1.17	0.7	0.14	0.41	0.42	0.03	0.16	2.53	2.75	0.36	0.49	0.01	-0.41	-0.23	-0.23	-0.27	-0.36	-0.31	0.1	-0.25	-0.31	-0.33	-0.42	-0.37	-0.28	-0.32	-0.39	-0.44	-0.33	-0.38	-0.44	-0.4	-0.47	-0.42	-0.35	-0.39	-0.39	-0.4
ZHENG_CORD_BLOOD_C8_PUTATIVE_LYMPHOID_PRIMED_MULTIPOTENT_PROGENITOR_2	-0.19	1.49	2.02	-0.12	-0.21	-0.1	1.17	0.42	1.09	-0.11	0.54	0.28	0.67	0.2	0.74	0.6	-0.25	-0.34	1.53	2.97	-0.27	0.13	0.27	-0.13	-0.35	-0.35	-0.03	-0.44	0	-0.04	-0.2	-0.33	-0.61	-0.36	-0.48	-0.48	-0.42	-0.39	-0.38	-0.3	-0.13	-0.38	-0.39	-0.44	-0.41	-0.43	-0.31	-0.33	-0.32
DESCARTES_FETAL_PLACENTA_VASCULAR_ENDOTHELIAL_CELLS	0.02	0.31	0.65	0.87	1.48	0.49	0.63	0.55	0.55	0.27	1.92	0.44	1.34	0.45	2.73	1.32	-0.16	-0.11	0.83	0.79	0.27	0.51	0.31	-0.22	-0.13	-0.06	0.46	-0.35	-0.33	1.24	-0.22	-0.27	-0.31	-0.16	-0.16	-0.22	-0.28	-0.27	-0.11	-0.27	-0.11	-0.25	-0.17	-0.35	-0.2	-0.11	-0.18	-0.36	-0.39
DESCARTES_MAIN_FETAL_ELF3_AGBL2_POSITIVE_CELLS	-0.21	-0.12	-0.01	-0.02	-0.03	-0.15	0.04	0.55	0.51	0.06	0.52	0.5	0.53	0.19	1.68	0.55	-0.3	-0.21	-0.09	0.79	0.51	0.37	-0.05	-0.24	0.14	-0.26	0	-0.19	-0.15	0.6	-0.14	-0.27	-0.28	-0.27	-0.26	-0.34	-0.4	-0.37	-0.22	-0.38	-0.12	-0.32	-0.25	-0.27	-0.3	-0.21	-0.26	-0.34	-0.38
DESCARTES_MAIN_FETAL_SLC26A4_PAEP_POSITIVE_CELLS	0	0.05	0.08	0.14	0.53	-0.14	1.08	0.96	0.97	0.13	2.32	0.16	0.71	0.1	1.98	0.7	-0.1	-0.21	0.11	0.9	0.05	0.07	-0.11	-0.1	-0.07	-0.21	-0.11	-0.22	0.33	0.47	-0.16	-0.2	-0.27	-0.15	-0.07	-0.18	-0.27	-0.42	-0.09	-0.07	-0.09	-0.1	-0.04	-0.04	-0.19	-0.09	-0.13	-0.17	-0.23
DESCARTES_MAIN_FETAL_PHOTORECEPTOR_CELLS	-0.3	1.57	1.13	-0.03	-0.02	0.51	0.29	0.51	1	0.3	0.55	0.49	1.67	0.12	1.32	0.4	-0.21	-0.28	0.37	0.19	0.07	-0.31	0.04	-0.34	-0.16	-0.21	-0.27	-0.36	-0.34	0.11	0.08	-0.32	-0.23	-0.42	-0.32	-0.27	-0.35	-0.34	-0.35	-0.37	-0.39	-0.33	-0.39	-0.4	-0.35	-0.37	-0.36	-0.35	-0.38
DESCARTES_FETAL_EYE_STROMAL_CELLS	1.67	1.18	3.96	0.2	0.12	-0.06	0.21	0.49	0.46	0.04	0.44	1.75	1.57	0.33	4.72	0.54	-0.03	-0.32	2.18	1.08	-0.02	0.02	0.37	-0.12	-0.16	-0.33	0.33	-0.28	-0.28	-0.06	-0.16	-0.31	-0.29	-0.38	-0.36	-0.45	-0.23	-0.26	-0.39	-0.3	-0.38	-0.38	-0.26	-0.34	-0.37	-0.32	-0.35	-0.39	-0.38
CUI_DEVELOPING_HEART_C3_FIBROBLAST_LIKE_CELL	1.41	1.84	3.49	0.4	-0.21	-0.26	0.54	1.27	0.94	0.5	0.77	0.31	0.36	0.13	2.29	0.68	-0.39	-0.46	0.35	0.86	-0.23	0.93	1.47	-0.33	-0.39	-0.35	-0.26	-0.39	-0.27	-0.37	-0.3	-0.38	-0.44	-0.47	-0.43	-0.46	-0.42	-0.43	-0.45	-0.44	-0.41	-0.44	-0.42	-0.45	-0.46	-0.41	-0.44	-0.44	-0.45
GAO_LARGE_INTESTINE_24W_C1_DCLK1POS_PROGENITOR	1.95	0.86	2.74	0.06	0.04	-0.32	0.09	0.63	0.93	-0.24	0.37	0.57	0.2	-0.01	1.72	0.38	-0.33	-0.33	0.48	0.79	-0.12	-0.27	0.16	-0.27	-0.4	-0.34	0.73	-0.38	-0.27	-0.38	-0.3	-0.33	-0.47	-0.44	-0.35	-0.45	-0.43	-0.36	-0.4	-0.43	-0.35	-0.43	-0.46	-0.46	-0.41	-0.42	-0.42	-0.49	-0.46
CUI_DEVELOPING_HEART_C4_ENDOTHELIAL_CELL	-0.42	0.43	1.29	1.05	0.74	0.45	1.93	0.97	1.3	0.11	0.9	2.48	1.27	0.13	2.2	1.17	-0.09	-0.19	2.81	3.55	0.4	0.13	-0.14	-0.28	-0.27	-0.49	-0.31	-0.46	-0.38	-0.64	-0.27	-0.35	-0.47	-0.46	-0.49	-0.53	-0.45	-0.42	-0.45	-0.4	-0.38	-0.46	-0.39	-0.48	-0.43	-0.54	-0.4	-0.4	-0.46
AIZARANI_LIVER_C11_HEPATOCYTES_1	-0.31	1.25	1.75	0.48	0.05	0.37	-0.12	0.07	0.06	-0.06	0.31	0.31	0.42	0.21	4.18	0.4	-0.28	-0.36	1.24	1.89	-0.07	-0.11	0.62	0.35	0.38	-0.21	0.07	-0.4	-0.32	0.35	-0.45	-0.39	-0.54	-0.4	-0.45	-0.47	-0.49	-0.45	-0.51	-0.44	-0.37	-0.52	-0.53	-0.52	-0.49	-0.49	-0.43	-0.47	-0.46
BUSSLINGER_GASTRIC_PPP1R1B_POSITIVE_CELLS	-0.24	1.41	2.33	-0.28	-0.05	-0.16	0.59	0	0.18	-0.15	0.89	0.86	0.39	-0.1	3.5	0.66	-0.19	0.03	1.85	3.08	-0.04	-0.08	0.44	0.08	-0.27	-0.29	-0.24	-0.36	0.04	0.04	-0.51	-0.35	-0.38	-0.44	-0.38	-0.27	-0.43	-0.29	-0.39	-0.32	-0.38	-0.45	-0.44	-0.38	-0.43	-0.29	-0.37	-0.45	-0.44
DESCARTES_FETAL_HEART_EPICARDIAL_FAT_CELLS	-0.09	0.93	1.82	0.12	-0.23	-0.09	0.02	0.28	0.16	0.13	0.23	1.27	0.95	0.95	2.92	0.34	0.03	-0.06	3	2.17	0.14	-0.04	0.41	-0.25	-0.21	-0.19	0.06	-0.28	-0.16	0.15	0.02	-0.31	-0.23	-0.4	-0.14	-0.27	-0.23	-0.33	-0.34	-0.26	-0.02	-0.22	-0.23	-0.34	-0.32	-0.11	-0.27	-0.32	-0.35
DESCARTES_FETAL_THYMUS_ANTIGEN_PRESENTING_CELLS	-0.12	0.44	1.48	0.78	-0.1	-0.2	0.26	0.01	0.06	-0.07	0.32	1.58	0.35	0.81	4.43	0.49	0.06	-0.02	2.04	2.69	0.89	-0.01	-0.19	-0.26	-0.26	-0.24	-0.22	-0.25	-0.35	0.21	-0.2	-0.32	-0.43	-0.41	-0.34	-0.24	-0.29	-0.37	-0.32	-0.32	-0.35	-0.37	-0.25	-0.35	-0.4	-0.12	-0.29	-0.37	-0.4
CUI_DEVELOPING_HEART_COMPACT_VENTRICULAR_CARDIOMYOCYTE	0.16	1.03	3	0.52	0.02	-0.11	0.28	0.24	0.26	0.01	0.08	0.39	0.28	0.43	2.9	0.72	-0.24	-0.36	1.89	4.53	0.44	1.63	1.59	0.23	0.19	-0.22	0.02	-0.23	-0.2	-0.26	-0.37	-0.29	-0.22	-0.35	-0.3	-0.37	-0.28	-0.37	-0.38	-0.35	-0.41	-0.38	-0.38	-0.33	-0.43	-0.39	-0.36	-0.44	-0.39
DESCARTES_FETAL_MUSCLE_MEGAKARYOCYTES	-0.28	1.73	3.09	0.13	0.08	-0.12	0.31	1.31	1.19	0.01	1.42	1.24	1.27	0.01	3.15	0.56	-0.32	-0.23	1.31	3.45	0.52	0.05	0.88	-0.27	-0.36	-0.17	-0.14	-0.41	-0.28	-0.32	-0.52	-0.35	-0.53	-0.5	-0.51	-0.47	-0.44	-0.55	-0.44	-0.49	-0.41	-0.54	-0.48	-0.51	-0.55	-0.43	-0.48	-0.45	-0.52
AIZARANI_LIVER_C10_MVECS_1	-0.14	1.87	2.89	0.99	0.33	0	0.62	1.14	1.85	1.03	1.98	0.99	1.33	0.75	2.71	1.01	-0.23	-0.28	2.49	4.08	0.72	-0.15	0.07	-0.21	-0.25	-0.34	-0.01	-0.36	-0.35	0.07	-0.35	-0.35	-0.29	-0.34	-0.34	-0.38	-0.42	-0.39	-0.35	-0.38	-0.38	-0.4	-0.36	-0.42	-0.39	-0.41	-0.36	-0.37	-0.41
AIZARANI_LIVER_C13_LSECS_2	-0.1	1.85	3.46	0.89	0.11	-0.06	0.79	1	1.57	0.12	1.36	0.58	1.16	0.11	3.55	0.92	-0.1	-0.2	1.65	2.84	0.75	-0.22	0.19	-0.24	-0.29	-0.33	-0.21	-0.4	-0.27	-0.03	-0.37	-0.33	-0.49	-0.36	-0.36	-0.43	-0.4	-0.32	-0.34	-0.36	-0.38	-0.36	-0.31	-0.39	-0.37	-0.39	-0.36	-0.37	-0.38
AIZARANI_LIVER_C9_LSECS_1	0.25	1.8	3.29	0.54	0.02	-0.15	0.42	0.8	1.76	0.83	1.04	0.79	1.39	0.53	3.41	1.49	-0.16	-0.22	1.71	3.49	0.97	0.08	0.06	-0.4	-0.31	-0.26	-0.26	-0.35	-0.36	-0.28	-0.29	-0.37	-0.47	-0.49	-0.47	-0.41	-0.44	-0.41	-0.35	-0.41	-0.36	-0.42	-0.4	-0.42	-0.44	-0.41	-0.39	-0.43	-0.44
AIZARANI_LIVER_C20_LSECS_3	-0.14	2.03	3.39	0.76	0.19	-0.14	0.48	0.83	1.15	0.72	0.96	1.23	1.55	0.44	2.23	1.42	-0.03	-0.15	2.09	3.07	0.89	-0.05	-0.02	-0.36	-0.28	-0.23	-0.24	-0.31	-0.31	-0.27	-0.25	-0.34	-0.4	-0.42	-0.42	-0.38	-0.43	-0.4	-0.35	-0.36	-0.33	-0.34	-0.37	-0.34	-0.37	-0.36	-0.34	-0.39	-0.38
TRAVAGLINI_LUNG_BRONCHIAL_VESSEL_2_CELL	-0.26	2.24	3.55	0.45	0.27	-0.03	0.92	0.85	1.43	0.14	1.25	1.12	1.68	-0.13	2.39	1.37	-0.27	-0.25	1.53	3.32	0.28	-0.13	-0.1	-0.19	-0.29	-0.36	-0.17	-0.4	-0.23	0.05	-0.35	-0.29	-0.36	-0.35	-0.29	-0.44	-0.41	-0.38	-0.3	-0.3	-0.3	-0.32	-0.33	-0.33	-0.39	-0.43	-0.32	-0.35	-0.37
RUBENSTEIN_SKELETAL_MUSCLE_ENDOTHELIAL_CELLS	-0.29	1.8	2.76	0.45	0.13	0.14	1.15	0.51	0.95	0.09	0.92	0.17	0.83	0.17	2.43	0.4	-0.32	-0.3	1.18	3.16	0.25	-0.25	0.33	-0.06	-0.31	-0.3	-0.19	-0.38	-0.18	-0.07	-0.26	-0.34	-0.5	-0.43	-0.4	-0.43	-0.41	-0.43	-0.27	-0.42	-0.47	-0.37	-0.36	-0.42	-0.4	-0.4	-0.36	-0.38	-0.41
DESCARTES_FETAL_CEREBELLUM_VASCULAR_ENDOTHELIAL_CELLS	-0.25	2.14	3.26	1.19	0.55	0.3	0.47	1.02	0.99	0.67	1.44	1.45	0.91	0.1	3.46	0.79	0.05	-0.1	2.2	2.94	0.81	0.13	0.42	-0.26	-0.32	-0.42	0.03	-0.37	-0.3	-0.06	-0.29	-0.36	-0.44	-0.32	-0.35	-0.42	-0.43	-0.44	-0.34	-0.4	-0.37	-0.35	-0.39	-0.39	-0.37	-0.38	-0.39	-0.41	-0.4
DESCARTES_FETAL_CEREBRUM_VASCULAR_ENDOTHELIAL_CELLS	-0.31	2.3	3.37	1.86	0.42	0.26	0.3	0.45	0.4	0.81	1.2	1.27	0.9	0.05	3.88	1.14	0.11	-0.01	2.8	3.28	0.9	1.16	1.13	-0.1	0.12	-0.38	0.06	-0.36	-0.3	-0.08	-0.33	-0.34	-0.45	-0.39	-0.39	-0.46	-0.46	-0.39	-0.39	-0.4	-0.4	-0.34	-0.39	-0.4	-0.42	-0.4	-0.35	-0.42	-0.41
FAN_EMBRYONIC_CTX_BIG_GROUPS_BRAIN_ENDOTHELIAL	-0.24	1.93	3.33	0.5	0.26	0.01	0.81	1.04	0.97	0.74	1.37	1.44	1.4	0.75	2.41	0.89	0.11	-0.08	2.17	3.2	0.21	0.93	0.66	-0.24	-0.33	-0.33	-0.16	-0.3	-0.35	-0.49	-0.26	-0.39	-0.44	-0.41	-0.37	-0.42	-0.4	-0.43	-0.34	-0.41	-0.34	-0.39	-0.39	-0.42	-0.43	-0.44	-0.42	-0.39	-0.41
FAN_EMBRYONIC_CTX_BRAIN_ENDOTHELIAL_1	-0.29	2.31	3.2	1.37	0.46	0.04	0.57	0.91	0.86	0.71	1.37	2.04	1.58	0.69	2.64	0.75	0.12	0.03	3.04	3.52	0.53	0.21	0.1	-0.09	0.2	-0.38	-0.04	-0.4	-0.37	-0.54	-0.36	-0.36	-0.49	-0.38	-0.35	-0.46	-0.44	-0.45	-0.44	-0.46	-0.37	-0.43	-0.43	-0.46	-0.47	-0.49	-0.38	-0.42	-0.45
AIZARANI_LIVER_C21_STELLATE_CELLS_1	-0.3	2.18	3.48	1.02	0.04	-0.06	0.44	0.65	1.09	0.3	0.48	1.48	1.65	0.66	3.28	1.13	-0.11	-0.26	3.03	4.42	0.19	0.7	0.75	-0.22	-0.33	-0.38	-0.16	-0.38	-0.22	-0.44	-0.28	-0.36	-0.36	-0.38	-0.37	-0.43	-0.45	-0.4	-0.33	-0.35	-0.41	-0.47	-0.4	-0.41	-0.44	-0.44	-0.4	-0.4	-0.43
MANNO_MIDBRAIN_NEUROTYPES_HPERIC	-0.35	2.32	3.18	0.93	0.2	0.14	0.65	1.36	1.67	0.15	1.1	1.33	1.43	0.32	4.11	1.1	-0.23	-0.31	2.92	5.04	0.67	0.87	1.11	0.06	-0.44	-0.41	-0.28	-0.31	-0.33	-0.2	-0.22	-0.38	-0.49	-0.34	-0.43	-0.46	-0.44	-0.44	-0.37	-0.43	-0.37	-0.48	-0.41	-0.41	-0.44	-0.44	-0.43	-0.42	-0.4
HU_FETAL_RETINA_FIBROBLAST	0.28	2.1	3.07	0.79	-0.08	-0.12	0.26	1.05	1.51	0.3	0.79	1.39	1.48	0.07	3.57	0.92	0.02	-0.13	2.83	3.49	0.46	0.43	0.43	-0.32	-0.46	-0.33	-0.07	-0.45	-0.37	-0.23	-0.29	-0.38	-0.38	-0.42	-0.42	-0.46	-0.41	-0.42	-0.42	-0.44	-0.4	-0.42	-0.4	-0.44	-0.39	-0.41	-0.44	-0.42	-0.43
MURARO_PANCREAS_MESENCHYMAL_STROMAL_CELL	0.84	2.1	3.24	1.01	0.02	-0.14	0.7	1.53	1.87	0.41	1.25	1.82	2.1	0.73	3.46	1.06	0	-0.17	3.15	4.96	0.29	0.33	0.72	-0.33	-0.21	-0.21	0	-0.42	-0.31	-0.19	-0.36	-0.35	-0.43	-0.42	-0.43	-0.46	-0.48	-0.45	-0.37	-0.4	-0.4	-0.41	-0.4	-0.41	-0.41	-0.39	-0.41	-0.38	-0.41
FAN_EMBRYONIC_CTX_BRAIN_ENDOTHELIAL_2	-0.18	2.08	3.51	0.73	0.07	-0.01	0.64	0.73	1.26	0.1	0.84	0.25	0.96	0.45	3.41	0.83	-0.13	-0.23	2.67	3.14	0.22	1.27	1.02	-0.19	0.37	-0.1	-0.19	-0.3	-0.2	-0.38	-0.21	-0.33	-0.38	-0.38	-0.39	-0.4	-0.41	-0.39	-0.3	-0.39	-0.37	-0.43	-0.38	-0.37	-0.42	-0.42	-0.36	-0.34	-0.39
MANNO_MIDBRAIN_NEUROTYPES_HPROGM	-0.13	2.02	2.89	1.23	0.38	-0.01	1	1.37	1.77	0	0.96	1.83	1.75	0.79	2.8	0.59	0.03	-0.19	2.33	2.41	1.17	0.42	0.55	-0.33	0.11	-0.08	0.62	-0.32	-0.28	0.07	-0.29	-0.28	-0.17	-0.23	-0.34	-0.3	-0.38	-0.37	-0.3	-0.41	-0.22	-0.29	-0.36	-0.39	-0.39	-0.34	-0.42	-0.36	-0.42
GAUTAM_EYE_CORNEA_TGFBI_HIGH_EPITHELIAL_CELLS	0.05	2.44	3.24	0.75	-0.05	-0.25	0.14	0.87	1.28	0.03	0.13	1.76	2.23	0.31	3.91	1.51	-0.19	-0.16	1.41	3.54	-0.07	0.15	0.05	-0.34	-0.14	-0.03	0.41	-0.43	-0.28	0.18	-0.25	-0.32	-0.12	-0.3	-0.4	-0.34	-0.32	-0.51	-0.33	-0.36	-0.42	-0.43	-0.4	-0.36	-0.41	-0.34	-0.37	-0.38	-0.38
AIZARANI_LIVER_C4_EPCAM_POS_BILE_DUCT_CELLS_1	-0.18	1.02	1.26	-0.22	-0.29	-0.29	0.14	0.89	1.15	0.01	0.4	0.53	0.68	0.04	3.24	0.86	-0.36	-0.33	2.36	2.85	1.02	0.67	1.25	-0.25	-0.31	-0.37	0.59	-0.14	-0.13	-0.25	-0.29	-0.39	-0.34	-0.43	-0.43	-0.37	-0.36	-0.42	-0.37	-0.39	-0.33	-0.41	-0.38	-0.44	-0.41	-0.37	-0.43	-0.39	-0.43
BUSSLINGER_DUODENAL_STEM_CELLS	-0.12	1.29	1.68	-0.06	0.02	-0.14	0.39	0.63	1.05	0.16	1.15	0.94	1.04	0.15	4.28	1.05	-0.23	-0.08	2.73	3.35	1.27	0.35	0.63	-0.24	-0.12	-0.25	0.22	-0.35	-0.12	-0.27	0.02	-0.36	-0.42	-0.35	-0.38	-0.32	-0.34	-0.38	-0.33	-0.23	-0.32	-0.35	-0.34	-0.3	-0.33	-0.29	-0.33	-0.39	-0.39
FAN_OVARY_CL11_MURAL_GRANULOSA_CELL	-0.18	1.67	2.5	0.52	0.12	-0.15	0.68	0.96	1.74	0.29	1.52	1.5	1.76	0.54	4.32	0.87	-0.14	-0.22	3.39	4.19	0.71	0.31	1.22	-0.44	-0.2	-0.22	0.84	-0.19	-0.16	0.06	-0.37	-0.38	-0.48	-0.5	-0.34	-0.41	-0.48	-0.52	-0.43	-0.36	-0.44	-0.38	-0.4	-0.44	-0.45	-0.36	-0.44	-0.42	-0.42
FAN_OVARY_CL15_SMALL_ANTRAL_FOLLICLE_GRANULOSA_CELL	-0.01	1.35	1.93	0.37	0.06	-0.14	1.06	1.28	1.62	0.34	1.68	1.07	1.58	0.24	5.68	1.09	0.11	-0.02	4.38	4.76	0.84	0.43	1.4	-0.44	-0.18	-0.14	0.86	-0.16	0.05	0.42	-0.2	-0.33	-0.46	-0.45	-0.33	-0.37	-0.44	-0.46	-0.28	-0.38	-0.39	-0.38	-0.37	-0.41	-0.43	-0.33	-0.36	-0.38	-0.39
FAN_OVARY_CL3_MATURE_CUMULUS_GRANULOSA_CELL_1	-0.15	1.82	2.78	0.45	-0.04	-0.24	0.89	0.87	1.85	0.29	1.56	0.39	0.7	0.67	4.08	0.89	-0.16	-0.31	2.26	2.56	0.67	0.42	1.03	-0.39	-0.13	-0.22	1.17	-0.16	0.01	-0.09	-0.18	-0.34	-0.5	-0.53	-0.49	-0.43	-0.52	-0.45	-0.37	-0.41	-0.39	-0.46	-0.45	-0.49	-0.49	-0.37	-0.43	-0.43	-0.49
FAN_OVARY_CL8_MATURE_CUMULUS_GRANULOSA_CELL_2	-0.05	1.6	2.74	0.58	0.26	-0.08	0.89	1.41	2.27	0.51	1.87	0.86	1.11	0.38	5.08	1.13	0.1	0.04	3.79	3.6	0.93	0.43	1.33	-0.18	1.11	-0.15	1.06	-0.28	-0.1	0.21	-0.27	-0.33	-0.73	-0.51	-0.44	-0.45	-0.56	-0.6	-0.49	-0.44	-0.44	-0.49	-0.54	-0.53	-0.55	-0.4	-0.41	-0.41	-0.5
CUI_DEVELOPING_HEART_TRABECULAR_ATRIAL_CARDIOMYOCYTE	0.39	1.27	2.38	-0.04	0	-0.08	0.7	1.18	2.29	0.08	1.45	0.84	1.38	-0.13	2.92	1.04	-0.21	-0.3	2.24	4.16	0.8	0.13	0.48	-0.31	-0.13	-0.25	0.39	-0.26	-0.07	0.01	-0.22	-0.33	-0.39	-0.38	-0.29	-0.34	-0.3	-0.39	-0.39	-0.43	-0.39	-0.33	-0.45	-0.45	-0.4	-0.38	-0.39	-0.39	-0.41
FAN_OVARY_CL9_PUTATIVE_APOPTOTIC_ENDOTHELIAL_CELL	-0.1	1.72	2.27	0.56	0.18	0.16	1.41	1.31	1.7	0.34	1.54	0.7	1.38	0.26	3.46	0.95	-0.25	-0.22	3.44	5.17	0.3	-0.14	0.32	-0.19	-0.37	-0.29	-0.22	-0.37	-0.08	-0.25	-0.23	-0.34	-0.4	-0.37	-0.35	-0.44	-0.43	-0.47	-0.22	-0.35	-0.4	-0.4	-0.42	-0.38	-0.43	-0.41	-0.36	-0.37	-0.36
LAKE_ADULT_KIDNEY_C17_COLLECTING_SYSTEM_PCS_STRESSED_DISSOC_SUBSET	-0.04	2.03	2.5	0.35	-0.28	-0.29	1.56	1.01	1.75	1.09	1.2	0.88	1.53	0.24	4.07	1.05	-0.18	-0.21	2.79	5.41	0.07	-0.16	-0.05	-0.05	-0.33	-0.14	0.44	-0.26	-0.16	0.19	-0.21	-0.42	-0.54	-0.4	-0.4	-0.33	-0.44	-0.4	-0.31	-0.41	-0.36	-0.37	-0.42	-0.49	-0.42	-0.41	-0.39	-0.41	-0.42
CUI_DEVELOPING_HEART_TRABECULAR_VENTRICULAR_CARDIOMYOCYTE	0.33	1.52	1.08	-0.09	-0.32	-0.37	0.01	0.55	1.23	-0.21	0.55	0.72	1.13	-0.01	2.73	0.77	-0.3	-0.35	3.15	5.23	0.47	0.57	0.29	-0.37	-0.41	-0.3	0.83	-0.46	-0.06	-0.46	-0.26	-0.4	-0.53	-0.5	-0.39	-0.43	-0.44	-0.43	-0.5	-0.46	-0.5	-0.47	-0.47	-0.53	-0.45	-0.47	-0.44	-0.49	-0.51
TRAVAGLINI_LUNG_CAPILLARY_INTERMEDIATE_1_CELL	-0.02	1.13	2.19	0.55	0.05	-0.08	0.12	1.18	1.48	0.27	0.74	0.89	1.25	-0.03	2.67	0.88	-0.13	-0.17	3.09	5.14	1.09	0.04	0.46	-0.32	-0.19	-0.41	-0.17	-0.27	-0.22	-0.59	-0.43	-0.36	-0.51	-0.36	-0.31	-0.44	-0.41	-0.43	-0.37	-0.43	-0.4	-0.42	-0.45	-0.42	-0.42	-0.43	-0.45	-0.45	-0.44
GAUTAM_EYE_CORNEA_FIBROBLASTS	0.6	0.78	2.1	0.58	0.36	-0.06	0.49	0.9	1.4	0.28	1.04	0.73	0.85	0.41	2.75	2.28	-0.21	-0.29	1.86	3.37	1.02	0.25	0.1	-0.47	-0.34	-0.31	-0.07	-0.37	0.37	-0.36	0.1	-0.36	-0.56	-0.45	-0.31	-0.28	-0.46	-0.47	-0.45	-0.34	-0.48	-0.47	-0.4	-0.29	-0.49	-0.37	-0.32	-0.44	-0.45
DESCARTES_FETAL_ADRENAL_MEGAKARYOCYTES	-0.35	0.95	0.3	-0.19	-0.28	-0.22	-0.26	0.41	1.07	-0.15	0.26	0.32	0.86	0.49	1.05	-0.12	-0.28	-0.11	0.81	1.7	0.55	-0.01	0.38	-0.37	-0.37	-0.43	-0.43	-0.42	-0.39	-0.46	-0.38	-0.34	-0.48	-0.41	-0.35	-0.45	-0.37	-0.42	-0.44	-0.44	-0.42	-0.36	-0.41	-0.43	-0.4	-0.45	-0.36	-0.43	-0.47
DESCARTES_FETAL_CEREBRUM_MICROGLIA	1.31	0.25	1.5	-0.09	-0.14	-0.08	1.84	1.12	2.04	0.26	1.42	1.19	2.31	-0.07	3.64	0.71	0.01	0.03	2.89	4.01	0.58	-0.04	0.47	0.14	0.11	-0.25	-0.11	-0.31	-0.09	-0.08	-0.01	-0.35	-0.39	-0.34	-0.27	-0.32	-0.37	-0.4	-0.32	-0.31	-0.24	-0.32	-0.38	-0.35	-0.38	-0.34	-0.3	-0.31	-0.33
DURANTE_ADULT_OLFACTORY_NEUROEPITHELIUM_OLFACTORY_ENSHEATHING_GLIA	0.03	0.56	1.99	0.02	0	-0.33	1.55	1.05	2.07	0.22	0.76	1.04	1.06	0.1	2.31	1.06	0.26	-0.04	2.26	3.72	0.35	0.93	1.83	0.59	-0.45	-0.52	-0.31	-0.39	-0.12	0.32	-0.09	-0.37	-0.54	-0.39	-0.56	-0.53	-0.48	-0.41	-0.41	-0.45	-0.45	-0.52	-0.5	-0.51	-0.49	-0.54	-0.44	-0.43	-0.43
MENON_FETAL_KIDNEY_5_PROXIMAL_TUBULE_CELLS	-0.01	1.2	1.45	-0.07	-0.08	-0.32	1.35	2.73	3.16	1	2.6	1.63	1.41	0.44	2.04	1.06	0.42	0.16	2.98	2.56	0.41	0.17	0.41	0.63	-0.35	-0.37	-0.25	-0.41	0.18	0.51	0	-0.3	-0.61	-0.39	-0.41	-0.38	-0.5	-0.54	-0.48	-0.46	-0.48	-0.61	-0.53	-0.51	-0.51	-0.48	-0.47	-0.48	-0.51
LAKE_ADULT_KIDNEY_C24_ENDOTHELIAL_CELLS_AEA_AND_DVR	0.2	1.02	2.37	0.11	-0.06	-0.24	1.32	1.13	2.46	0.16	1.8	0.19	0.73	0.54	1.86	0.54	-0.24	-0.34	1.55	2.71	0.16	-0.15	0.07	-0.2	-0.41	-0.25	-0.27	-0.33	0.02	-0.43	-0.22	-0.34	-0.48	-0.46	-0.43	-0.48	-0.42	-0.38	-0.42	-0.38	-0.47	-0.44	-0.38	-0.46	-0.36	-0.5	-0.39	-0.37	-0.42
TRAVAGLINI_LUNG_ALVEOLAR_FIBROBLAST_CELL	-0.22	0.6	2.47	0.16	0.02	-0.19	1.08	2.67	3.5	0.94	2.48	1.9	2.26	0.55	4.21	0.53	-0.23	-0.24	1.75	4.56	0.36	0.33	1.16	-0.12	0.07	-0.31	0.12	-0.26	-0.16	-0.23	-0.23	-0.34	-0.3	-0.33	-0.36	-0.39	-0.36	-0.43	-0.35	-0.34	-0.42	-0.41	-0.38	-0.37	-0.39	-0.42	-0.38	-0.42	-0.44
ZHENG_CORD_BLOOD_C6_HSC_MULTIPOTENT_PROGENITOR	-0.22	0.61	1.43	0.3	-0.06	-0.18	0.92	2.37	3.85	0.44	2.3	0.5	1.33	0.87	2.68	0.41	0.05	-0.01	2.54	3.39	0.23	0.52	0.27	0.11	-0.01	-0.25	-0.15	-0.14	-0.03	-0.46	-0.3	-0.32	-0.56	-0.45	-0.33	-0.4	-0.46	-0.46	-0.44	-0.36	-0.47	-0.54	-0.41	-0.44	-0.49	-0.41	-0.37	-0.41	-0.43
FAN_EMBRYONIC_CTX_ASTROCYTE_2	-0.41	1.45	1.7	-0.33	-0.33	-0.2	-0.03	0.76	1.2	0.28	0.64	0.78	0.76	-0.12	1.42	0.27	-0.41	-0.39	0.45	1.69	0.13	-0.2	0.91	0.52	0.44	-0.49	-0.25	-0.41	-0.28	0.29	-0.42	-0.4	-0.61	-0.5	-0.44	-0.45	-0.48	-0.45	-0.42	-0.43	-0.45	-0.51	-0.57	-0.55	-0.52	-0.49	-0.47	-0.53	-0.51
DURANTE_ADULT_OLFACTORY_NEUROEPITHELIUM_PERICYTES	0.02	2.47	3.01	1.09	0.46	0.4	0.35	0.28	0.85	0.01	1.59	0.58	1.05	1.02	2.33	0.85	-0.16	-0.23	0.61	1.97	0.29	-0.05	1.01	-0.13	0	-0.3	-0.13	-0.24	-0.15	0.56	-0.27	-0.31	-0.4	-0.39	-0.24	-0.46	-0.31	-0.39	-0.38	-0.29	-0.42	-0.35	-0.34	-0.4	-0.39	-0.32	-0.37	-0.4	-0.38
FAN_EMBRYONIC_CTX_BIG_GROUPS_GLIAL	0.24	1.41	2.03	0.43	-0.02	-0.16	0.15	0.57	1	0.06	0.94	0.46	0.47	0.51	2.21	0.36	-0.29	-0.33	0.87	1.5	0.75	0.4	1.47	-0.36	0.88	0.24	1.03	0.07	0.05	-0.11	-0.31	-0.36	-0.47	-0.29	-0.3	-0.39	-0.43	-0.4	-0.3	-0.42	-0.37	-0.48	-0.45	-0.43	-0.42	-0.41	-0.43	-0.39	-0.41
GAUTAM_EYE_CHOROID_SCLERA_FIBROBLASTS	1.41	2.07	3.12	0.15	-0.07	-0.18	0.93	1.46	1.83	0.56	1.69	0.89	2.14	2.08	4.01	0.63	-0.38	-0.36	1.84	3.16	0.72	0.24	2.16	-0.37	-0.06	-0.16	1.35	0.03	-0.23	-0.16	-0.22	-0.39	-0.47	-0.35	-0.43	-0.42	-0.43	-0.52	-0.43	-0.46	-0.45	-0.44	-0.43	-0.46	-0.44	-0.4	-0.48	-0.45	-0.48
DESCARTES_FETAL_PLACENTA_SYNCYTIOTROPHOBLASTS_AND_VILLOUS_CYTOTROPHOBLASTS	-0.24	1.17	2.6	0.19	0.22	0.46	0.89	0.61	0.78	0.02	0.5	1.18	1.82	0.98	2.54	0.62	-0.04	-0.23	0.05	2.41	-0.03	0.47	-0.02	-0.21	0.17	-0.09	-0.01	-0.21	-0.42	-0.28	-0.3	-0.25	0.09	0.08	0.01	-0.22	-0.31	-0.32	-0.31	-0.09	-0.11	-0.4	-0.19	-0.19	-0.3	-0.25	-0.13	-0.25	-0.29
DESCARTES_FETAL_PANCREAS_DUCTAL_CELLS	-0.36	2.11	2.12	0.02	-0.21	-0.36	-0.22	0.49	0.62	-0.19	0.14	0.26	0.52	0.46	3.27	0.03	-0.42	-0.41	-0.15	0.08	-0.06	0.02	0.04	-0.33	-0.33	-0.44	-0.3	-0.43	-0.26	-0.57	-0.45	-0.41	-0.42	-0.47	-0.26	-0.45	-0.37	-0.38	-0.45	-0.43	-0.37	-0.41	-0.44	-0.38	-0.4	-0.43	-0.45	-0.42	-0.42
DESCARTES_FETAL_LIVER_STELLATE_CELLS	-0.37	1.64	2.76	0.16	0.16	-0.12	0.16	1.06	1.03	0.51	0.36	0.55	0.47	-0.11	3.42	0.66	-0.46	-0.49	-0.3	0.66	-0.01	0.06	0.33	-0.41	-0.45	-0.34	0.28	-0.46	-0.33	-0.32	-0.35	-0.39	-0.48	-0.49	-0.41	-0.46	-0.25	-0.45	-0.41	-0.47	-0.36	-0.41	-0.43	-0.45	-0.46	-0.44	-0.43	-0.45	-0.47
LAKE_ADULT_KIDNEY_C13_THICK_ASCENDING_LIMB	-0.35	1.78	2.89	0.08	-0.13	-0.17	0.77	0.58	1.52	-0.08	0.55	0.68	1	-0.04	3.19	0.5	-0.3	-0.34	0.06	0.19	-0.12	-0.04	0.18	-0.27	-0.05	-0.28	-0.3	-0.28	-0.31	-0.12	-0.18	-0.37	-0.36	-0.43	-0.27	-0.36	-0.39	-0.4	-0.37	-0.39	-0.36	-0.4	-0.36	-0.4	-0.42	-0.4	-0.41	-0.42	-0.41
AIZARANI_LIVER_C33_STELLATE_CELLS_2	-0.21	1.98	3.34	0.06	-0.18	-0.17	0.55	0.96	1.68	0.49	0.91	1.18	1.83	1.04	3.48	0.61	-0.21	-0.38	1.54	3.46	-0.11	0.75	1.24	-0.22	-0.28	-0.4	-0.29	-0.27	-0.37	-0.39	-0.22	-0.35	-0.47	-0.46	-0.43	-0.45	-0.42	-0.41	-0.35	-0.41	-0.43	-0.48	-0.38	-0.43	-0.46	-0.43	-0.38	-0.38	-0.4
FAN_OVARY_CL5_HEALTHY_SELECTABLE_FOLLICLE_THECAL_CELL	0.26	2.08	3.65	-0.27	-0.33	-0.4	0.44	0.85	1.3	0.21	0.62	1.49	1.75	0.27	3.09	0.66	-0.28	-0.41	1.09	2.38	0.04	0.88	0.9	0.16	0.23	-0.23	-0.21	-0.38	-0.31	-0.04	-0.08	-0.35	-0.51	-0.41	-0.45	-0.49	-0.47	-0.37	-0.4	-0.42	-0.39	-0.43	-0.43	-0.43	-0.47	-0.5	-0.46	-0.43	-0.44
MENON_FETAL_KIDNEY_3_STROMAL_CELLS	0.2	1.58	3.12	-0.03	-0.22	-0.24	0.77	1.28	1.87	0.43	0.71	0.46	1.08	0.44	2.94	0.88	-0.27	-0.35	1.53	1.73	0.03	0.78	1.18	-0.31	-0.33	-0.33	-0.08	-0.33	-0.26	-0.27	-0.25	-0.4	-0.51	-0.46	-0.32	-0.45	-0.43	-0.43	-0.4	-0.39	-0.43	-0.48	-0.41	-0.41	-0.44	-0.4	-0.42	-0.42	-0.41
RUBENSTEIN_SKELETAL_MUSCLE_PERICYTES	-0.11	1.48	2.61	-0.36	-0.27	-0.18	0.34	0.49	0.96	0.31	0.24	0.22	0.69	-0.03	2.51	0.8	-0.41	-0.44	0.53	1.9	0.42	1.38	1.34	-0.27	0.42	-0.21	-0.26	-0.42	-0.24	-0.54	-0.29	-0.35	-0.52	-0.47	-0.49	-0.52	-0.47	-0.4	-0.41	-0.46	-0.41	-0.41	-0.43	-0.45	-0.48	-0.47	-0.46	-0.46	-0.48
DESCARTES_FETAL_INTESTINE_ERYTHROBLASTS	-0.38	0.73	1.89	-0.01	0.01	0	0.09	0.45	0.83	0.25	0.57	1.42	1.52	0.32	3.01	0.41	-0.2	-0.32	0.98	1.19	0.13	0.25	0.26	-0.35	-0.18	-0.39	0.21	-0.43	-0.21	-0.16	-0.35	-0.33	-0.56	-0.44	-0.29	-0.32	-0.41	-0.43	-0.36	-0.36	-0.41	-0.46	-0.37	-0.44	-0.56	-0.43	-0.48	-0.4	-0.47
MURARO_PANCREAS_ENDOTHELIAL_CELL	-0.32	1.91	3.24	0.75	0.15	-0.04	0.61	0.78	1.47	1.38	1.6	1.66	1.6	0.29	3.77	0.95	-0.17	-0.32	1.49	1.85	0.4	0.77	0.34	-0.24	0.29	-0.03	-0.19	-0.33	-0.38	-0.41	-0.18	-0.37	-0.48	-0.39	-0.45	-0.43	-0.43	-0.4	-0.32	-0.44	-0.39	-0.43	-0.4	-0.43	-0.41	-0.43	-0.4	-0.41	-0.41
HAY_BONE_MARROW_PLATELET	-0.04	1.02	2.15	0.02	-0.15	-0.2	0.01	1.68	1.31	0.22	1.01	0.78	2.52	0.43	3.16	0.23	-0.34	-0.35	1.22	2.67	-0.04	0.24	0.3	-0.35	-0.21	-0.4	-0.43	-0.41	-0.29	-0.37	-0.31	-0.38	-0.44	-0.44	-0.35	-0.47	-0.43	-0.46	-0.47	-0.41	-0.36	-0.43	-0.46	-0.47	-0.49	-0.38	-0.36	-0.39	-0.44
DESCARTES_FETAL_THYMUS_VASCULAR_ENDOTHELIAL_CELLS	-0.39	2.01	2.97	0.1	0.07	-0.24	0.4	1.05	1.69	0.55	1.81	0.42	1.32	0.04	2.92	0.67	-0.38	-0.41	-0.02	2.94	-0.18	-0.33	-0.2	-0.4	-0.27	-0.41	-0.23	-0.43	-0.44	-0.01	-0.35	-0.38	-0.42	-0.39	-0.42	-0.46	-0.37	-0.46	-0.45	-0.42	-0.44	-0.47	-0.46	-0.46	-0.46	-0.47	-0.43	-0.46	-0.45
LAKE_ADULT_KIDNEY_C15_CONNECTING_TUBULE	-0.26	2.08	3.33	0.36	-0.1	-0.24	0.68	1.68	2.13	0.6	1.89	0.94	1.5	1.01	3.55	0.7	-0.42	-0.31	-0.23	1.53	0.21	0.1	0.14	-0.15	-0.2	-0.28	-0.14	-0.35	-0.24	-0.32	-0.25	-0.33	-0.39	-0.38	-0.3	-0.32	-0.29	-0.34	-0.45	-0.37	-0.36	-0.35	-0.38	-0.39	-0.39	-0.35	-0.32	-0.4	-0.41
LAKE_ADULT_KIDNEY_C16_COLLECTING_SYSTEM_PRINCIPAL_CELLS_CORTEX	-0.33	1.61	2.93	0.13	-0.29	-0.33	0.84	1.33	2.43	0.36	2.03	0.69	1.39	0.65	3.54	0.48	-0.43	-0.41	0.07	1.47	-0.06	-0.03	0.14	-0.28	-0.22	-0.4	-0.21	-0.36	-0.35	-0.11	-0.22	-0.33	-0.43	-0.35	-0.32	-0.37	-0.31	-0.35	-0.3	-0.36	-0.35	-0.33	-0.38	-0.44	-0.43	-0.37	-0.33	-0.34	-0.45
LAKE_ADULT_KIDNEY_C28_INTERSTITIUM	-0.32	1.97	3.1	-0.12	-0.19	-0.17	0.86	2.25	2.89	0.72	1.79	1.11	2.17	-0.12	2.58	0.21	-0.36	-0.35	0.04	1.59	0.11	-0.21	0.86	-0.35	-0.37	-0.38	-0.14	-0.37	-0.3	-0.5	-0.35	-0.39	-0.46	-0.49	-0.37	-0.43	-0.38	-0.41	-0.41	-0.36	-0.41	-0.5	-0.4	-0.42	-0.41	-0.43	-0.4	-0.44	-0.42
LAKE_ADULT_KIDNEY_C27_VASCULAR_SMOOTH_MUSCLE_CELLS_AND_PERICYTES	-0.37	1.9	2.94	0.04	-0.12	-0.17	0.7	1.8	2.79	0.58	1.48	1.78	2.37	0.01	3.73	0.89	-0.35	-0.35	0.77	2.37	-0.19	-0.1	0.58	-0.46	-0.4	-0.41	-0.29	-0.4	-0.3	-0.22	-0.44	-0.4	-0.47	-0.53	-0.37	-0.46	-0.39	-0.52	-0.47	-0.4	-0.45	-0.53	-0.42	-0.46	-0.49	-0.44	-0.42	-0.45	-0.45
LAKE_ADULT_KIDNEY_C4_PROXIMAL_TUBULE_EPITHELIAL_CELLS_S2	-0.36	1.83	2.98	-0.19	-0.23	-0.35	0.65	1.41	2.16	0.37	0.8	0.85	1.65	-0.11	2.58	0.69	-0.33	-0.35	0.29	1.99	-0.22	-0.31	0.5	-0.42	-0.33	-0.4	-0.31	-0.38	-0.32	-0.3	-0.29	-0.39	-0.41	-0.45	-0.42	-0.37	-0.4	-0.44	-0.42	-0.4	-0.36	-0.37	-0.39	-0.4	-0.36	-0.38	-0.36	-0.38	-0.41
LAKE_ADULT_KIDNEY_C22_ENDOTHELIAL_CELLS_GLOMERULAR_CAPILLARIES	-0.36	1.86	3	-0.06	-0.16	-0.04	0.56	1.12	1.31	-0.06	0.85	1	1.15	0.05	2.47	0.26	-0.25	-0.29	0.59	1.12	0.21	-0.35	-0.05	-0.39	-0.35	-0.29	-0.29	-0.34	-0.32	-0.25	-0.24	-0.38	-0.43	-0.48	-0.4	-0.42	-0.37	-0.42	-0.37	-0.39	-0.45	-0.45	-0.37	-0.44	-0.44	-0.41	-0.41	-0.39	-0.41
LAKE_ADULT_KIDNEY_C26_MESANGIAL_CELLS	0.02	2.09	3.5	0.08	-0.06	-0.12	0.54	0.77	1.95	0.07	1.61	1.65	1.25	0.04	3.3	0.98	-0.29	-0.27	1.12	2.23	0.37	-0.18	-0.13	-0.38	-0.2	-0.28	-0.24	-0.34	-0.08	-0.4	-0.27	-0.38	-0.43	-0.46	-0.45	-0.45	-0.37	-0.46	-0.46	-0.37	-0.43	-0.55	-0.48	-0.44	-0.49	-0.44	-0.44	-0.47	-0.44
LAKE_ADULT_KIDNEY_C3_PROXIMAL_TUBULE_EPITHELIAL_CELLS_S1_S2	-0.23	1.42	2.69	-0.02	-0.26	-0.22	0.66	0.6	1.53	0.06	0.58	0.42	0.81	0.13	2.86	0.55	-0.3	-0.24	0.4	1.35	0	-0.28	0.08	-0.36	-0.2	-0.24	-0.27	-0.31	-0.22	-0.05	-0.24	-0.36	-0.48	-0.39	-0.34	-0.3	-0.33	-0.39	-0.31	-0.32	-0.28	-0.38	-0.33	-0.33	-0.35	-0.33	-0.36	-0.34	-0.34
LAKE_ADULT_KIDNEY_C5_PROXIMAL_TUBULE_EPITHELIAL_CELLS_STRESS_INFLAM	-0.26	2.28	3.47	0.78	-0.12	-0.29	0.27	0.5	1.22	0	0.86	1.73	1	-0.04	3.29	0.98	-0.23	-0.25	0.99	1.72	-0.06	0.24	-0.01	-0.39	-0.1	-0.12	-0.08	-0.23	-0.24	-0.19	-0.21	-0.32	-0.43	-0.47	-0.47	-0.38	-0.39	-0.45	-0.45	-0.36	-0.43	-0.44	-0.39	-0.43	-0.48	-0.31	-0.37	-0.36	-0.39
ZHENG_CORD_BLOOD_C7_PUTATIVE_LYMPHOID_PRIMED_MULTIPOTENT_PROGENITOR_1	0.32	2.84	2.15	0.42	-0.1	-0.31	1.21	0.93	1.36	0.3	0.58	0.6	1.2	-0.01	4.13	0.74	-0.35	-0.37	0.53	3.19	0.4	-0.15	0.19	-0.18	-0.35	-0.26	0.06	-0.35	-0.21	-0.59	-0.13	-0.34	-0.42	-0.35	-0.39	-0.38	-0.33	-0.35	-0.28	-0.33	-0.28	-0.39	-0.33	-0.38	-0.27	-0.41	-0.28	-0.33	-0.38
DESCARTES_MAIN_FETAL_ENDOCARDIAL_CELLS	-0.06	0.29	0.97	0.04	0.16	-0.05	0.36	0.33	0.43	0.08	0.66	0.33	0.64	0.43	1.74	0.39	-0.33	-0.38	-0.03	0.89	0.09	-0.27	0.68	-0.26	0.08	-0.3	-0.14	-0.39	-0.23	0.19	-0.17	-0.32	-0.21	-0.29	-0.21	-0.29	-0.33	-0.29	-0.32	-0.41	-0.35	-0.41	-0.37	-0.36	-0.35	-0.32	-0.33	-0.35	-0.38
CUI_DEVELOPING_HEART_CARDIAC_FIBROBLASTS	-0.32	1.89	2.5	0.89	1.33	-0.19	0.61	0.97	2.03	0.45	0.69	1.99	1.56	0.79	4.03	0.29	-0.45	-0.43	-0.21	3.42	-0.21	0.03	1.06	-0.36	0.51	-0.01	-0.36	-0.42	-0.3	-0.13	-0.2	-0.35	-0.45	-0.29	-0.41	-0.5	-0.51	-0.61	-0.4	-0.48	-0.45	-0.42	-0.51	-0.5	-0.49	-0.45	-0.42	-0.5	-0.48
MANNO_MIDBRAIN_NEUROTYPES_HPROGBP	-0.22	1.48	2.11	1.55	0.41	-0.03	0.54	1.61	2.55	0.26	1.42	1.52	1.51	0.97	3.34	0.55	-0.23	-0.24	0.28	1.81	0.3	0.24	0.36	-0.37	0.04	-0.12	0.47	-0.34	-0.28	0.33	-0.31	-0.31	-0.32	-0.33	-0.2	-0.34	-0.38	-0.41	-0.24	-0.39	-0.38	-0.3	-0.41	-0.41	-0.42	-0.32	-0.34	-0.37	-0.43
MANNO_MIDBRAIN_NEUROTYPES_HPROGFPL	-0.11	1.06	1.8	1.38	0.63	-0.03	0.97	1.3	2.09	0.02	1.1	1.41	1.64	1.08	2.45	0.62	-0.12	-0.22	0.55	1.82	0.2	0.53	0.66	-0.39	0.19	-0.12	0.56	-0.29	-0.28	0.42	-0.25	-0.31	-0.12	-0.27	-0.34	-0.28	-0.35	-0.45	-0.27	-0.41	-0.34	-0.24	-0.37	-0.36	-0.35	-0.25	-0.31	-0.29	-0.36
MANNO_MIDBRAIN_NEUROTYPES_HPROGFPM	-0.15	1.08	1.56	1.46	0.53	-0.02	0.88	1.82	2.8	0.13	0.94	1.4	1.68	0.88	3.8	0.66	-0.17	-0.12	1.19	2.58	0.33	0.47	0.71	-0.33	0.08	-0.17	0.67	-0.28	-0.28	0.55	-0.21	-0.33	-0.18	-0.28	-0.34	-0.31	-0.37	-0.42	-0.28	-0.43	-0.35	-0.26	-0.37	-0.4	-0.36	-0.25	-0.34	-0.29	-0.38
TRAVAGLINI_LUNG_PLASMACYTOID_DENDRITIC_CELL	0.78	1.07	2.26	1.21	-0.12	-0.16	0.75	1.29	2.44	0.51	0.58	1.26	0.88	0.66	3.31	0.75	-0.24	-0.37	0.72	2.65	0.58	-0.03	0.31	-0.32	-0.26	-0.36	-0.09	-0.26	-0.14	0.08	-0.21	-0.31	-0.38	-0.46	-0.38	-0.33	-0.46	-0.49	-0.28	-0.43	-0.25	-0.49	-0.44	-0.42	-0.37	-0.31	-0.36	-0.39	-0.39
LAKE_ADULT_KIDNEY_C1_EPITHELIAL_CELLS_UNASSIGNED	-0.27	0.46	1.74	0.15	-0.26	-0.21	0.89	0.62	1.76	-0.24	0.64	0.45	0.89	0.19	1.23	0.32	-0.42	-0.37	-0.38	1.2	-0.26	-0.36	0.18	-0.33	-0.4	-0.33	-0.13	-0.4	-0.45	-0.28	-0.03	-0.34	-0.36	-0.41	-0.32	-0.36	-0.38	-0.41	-0.35	-0.41	-0.47	-0.43	-0.37	-0.35	-0.37	-0.38	-0.37	-0.38	-0.4
MENON_FETAL_KIDNEY_2_NEPHRON_PROGENITOR_CELLS	0	1.49	3.29	0.13	0.28	-0.21	2.54	0.7	1.16	0.05	0.64	0.25	1.79	0.26	2.4	2.19	-0.24	-0.14	1.02	1.24	0.08	1.02	0.25	-0.3	-0.26	-0.32	0.04	-0.4	-0.11	-0.21	-0.15	-0.35	-0.28	-0.43	-0.43	-0.38	-0.4	-0.4	-0.34	-0.29	-0.41	-0.4	-0.34	-0.39	-0.43	-0.35	-0.38	-0.34	-0.4
DESCARTES_FETAL_ADRENAL_SYMPATHOBLASTS	-0.32	-0.34	-0.35	-0.35	-0.43	-0.38	-0.14	0.2	0	0.06	0.24	0.64	0.59	-0.27	1.95	-0.07	-0.37	-0.43	0.25	1.44	-0.04	-0.16	1.23	-0.43	-0.34	-0.42	-0.47	-0.38	-0.3	-0.27	-0.37	-0.34	-0.45	-0.41	-0.4	-0.34	-0.44	-0.44	-0.45	-0.4	-0.4	-0.33	-0.37	-0.39	-0.37	-0.41	-0.41	-0.39	-0.41
DESCARTES_MAIN_FETAL_HEMATOPOIETIC_STEM_CELLS	-0.13	-0.19	-0.08	-0.34	-0.24	-0.26	-0.01	0.11	-0.1	-0.32	-0.07	1.03	1.04	-0.27	1.67	-0.15	-0.34	-0.38	0.67	0.57	-0.22	-0.08	0.77	-0.12	0.43	-0.44	-0.26	-0.31	-0.13	0.35	-0.15	-0.28	-0.42	-0.2	-0.32	-0.38	-0.3	-0.26	-0.48	-0.35	-0.28	-0.33	-0.26	-0.34	-0.44	-0.25	-0.41	-0.4	-0.33
DESCARTES_FETAL_STOMACH_NEUROENDOCRINE_CELLS	-0.02	-0.19	-0.27	0.35	-0.13	-0.33	0.15	0.04	0.06	0.08	0.51	0.45	0.87	-0.08	2.22	-0.05	-0.4	-0.13	0.11	0.67	-0.28	-0.2	0.71	-0.15	-0.32	0.12	-0.01	-0.35	0.03	-0.17	-0.18	-0.39	-0.35	-0.24	-0.1	-0.4	-0.33	-0.29	-0.34	-0.21	-0.21	-0.25	-0.2	-0.33	-0.18	-0.27	-0.34	-0.22	-0.25
AIZARANI_LIVER_C1_NK_NKT_CELLS_1	-0.4	0.08	-0.05	2.52	0.35	0.03	0.84	0.28	0.67	0.02	0.99	1.38	0.48	0.03	2.07	0.61	-0.35	-0.43	0.38	1.93	-0.2	-0.39	1.56	-0.16	-0.49	-0.39	-0.05	-0.55	-0.2	-0.15	-0.36	-0.34	-0.48	-0.47	-0.49	-0.45	-0.4	-0.42	-0.28	-0.38	-0.38	-0.46	-0.3	-0.45	-0.43	-0.46	-0.31	-0.37	-0.39
CUI_DEVELOPING_HEART_C9_B_T_CELL	-0.38	0.27	1.66	1.18	0.02	-0.12	2.27	0.38	0.33	-0.14	0.86	1.26	0.41	0.24	4.48	0.84	-0.24	-0.33	1.33	2.31	0.11	0.19	2.94	-0.03	-0.44	-0.31	-0.15	-0.41	-0.02	-0.51	-0.42	-0.31	-0.58	-0.36	-0.42	-0.42	-0.38	-0.44	-0.36	-0.36	-0.33	-0.39	-0.29	-0.44	-0.39	-0.55	-0.37	-0.4	-0.34
DESCARTES_FETAL_MUSCLE_LYMPHOID_CELLS	-0.24	0.11	1.47	0.47	0.17	-0.12	1.49	0.63	0.21	0.31	1.23	0.45	0.14	0.6	2.35	0.86	-0.25	-0.43	0.34	0.9	0.16	0.15	0.7	-0.36	-0.26	-0.2	-0.1	-0.24	-0.35	-0.24	-0.23	-0.32	-0.42	-0.29	-0.08	-0.28	-0.21	-0.35	-0.29	-0.36	-0.25	-0.32	-0.27	-0.35	-0.36	-0.34	-0.19	-0.37	-0.34
DESCARTES_FETAL_LUNG_CSH1_CSH2_POSITIVE_CELLS	-0.16	0.37	1.21	2.41	-0.27	-0.1	1.38	0.74	0.79	0.94	0.35	0.27	0.48	0.75	3.84	0.24	-0.39	-0.38	0.27	2.77	0.05	1.23	0.24	-0.35	-0.34	-0.16	-0.18	-0.29	-0.22	-0.04	-0.2	-0.35	-0.46	-0.51	-0.5	-0.34	-0.37	-0.39	-0.32	-0.42	-0.31	-0.45	-0.38	-0.39	-0.43	-0.35	-0.45	-0.42	-0.44
DESCARTES_MAIN_FETAL_ASTROCYTES	-0.14	0.07	0.14	0.14	0.1	-0.01	-0.24	0.1	0.17	-0.25	0.32	0.8	0.43	0.13	2.36	0.25	0	-0.18	0.74	0.19	1.37	0.18	-0.18	-0.25	-0.27	-0.17	0.23	-0.38	-0.35	-0.51	-0.31	-0.37	-0.34	-0.22	-0.14	-0.23	-0.12	-0.15	-0.3	-0.25	-0.34	-0.29	-0.19	-0.27	-0.29	-0.16	-0.25	-0.31	-0.32
DESCARTES_FETAL_EYE_VASCULAR_ENDOTHELIAL_CELLS	-0.34	0.29	0.59	0.13	0.51	0.17	-0.18	0.53	0.67	0.02	0.52	0.14	0.62	-0.07	2.04	0.5	-0.37	-0.45	-0.09	0.77	1.33	-0.17	0.52	-0.33	-0.2	-0.26	0.14	-0.34	-0.43	-0.09	-0.28	-0.33	-0.32	-0.39	-0.36	-0.39	-0.4	-0.33	-0.34	-0.4	-0.38	-0.41	-0.38	-0.37	-0.39	-0.41	-0.38	-0.4	-0.39
GOBP_MESODERMAL_CELL_DIFFERENTIATION	-0.2	1.55	0.34	0.68	0.58	0.15	-0.14	0.58	1.02	-0.24	0.6	0.64	1.15	0.18	4.19	0.44	-0.06	-0.08	0.77	1.99	1.38	-0.19	0.14	0.06	0.09	-0.13	-0.09	-0.32	-0.32	-0.42	-0.06	-0.3	-0.24	-0.23	-0.17	-0.31	-0.19	-0.35	-0.34	-0.28	-0.25	-0.4	-0.32	-0.27	-0.3	-0.35	-0.39	-0.38	-0.39
GOBP_MESODERM_DEVELOPMENT	-0.3	0.75	0.27	2.37	1.14	-0.1	0.51	0.41	0.72	-0.06	1	0.74	1.56	0.02	5.47	0.62	-0.16	-0.24	0.33	1.2	1.2	0.15	0.13	-0.2	-0.07	-0.3	-0.12	-0.3	-0.29	-0.39	-0.26	-0.33	-0.3	-0.3	-0.22	-0.26	-0.36	-0.36	-0.37	-0.37	-0.38	-0.22	-0.28	-0.32	-0.36	-0.22	-0.36	-0.38	-0.34
GOBP_MESODERM_MORPHOGENESIS	-0.27	0.93	0.37	2.31	0.66	0	0.27	0.39	0.81	-0.16	1.28	0.38	0.77	0.01	3.06	0.55	-0.26	-0.27	0.32	1.47	1.08	-0.17	0.35	-0.13	0.05	-0.23	-0.09	-0.33	-0.35	-0.43	-0.16	-0.32	-0.32	-0.27	-0.17	-0.29	-0.33	-0.36	-0.37	-0.36	-0.36	-0.32	-0.36	-0.33	-0.32	-0.33	-0.41	-0.4	-0.37
AIZARANI_LIVER_C17_HEPATOCYTES_3	-0.27	-0.29	-0.23	0.26	0.13	0.45	-0.26	-0.08	0.06	-0.17	0.01	-0.07	-0.18	0.08	2.46	-0.24	-0.34	-0.41	0.09	1.2	-0.03	-0.29	0.51	0.53	-0.08	-0.42	-0.19	-0.41	-0.29	0.77	-0.06	-0.35	-0.37	-0.29	-0.42	-0.36	-0.39	-0.19	-0.44	-0.39	-0.3	-0.46	-0.43	-0.41	-0.38	-0.47	-0.41	-0.4	-0.41
AIZARANI_LIVER_C14_HEPATOCYTES_2	-0.3	0.02	-0.12	0.94	-0.07	0.65	0.15	-0.03	-0.11	-0.08	0.08	0.17	0.2	-0.1	3.89	0.62	-0.28	-0.3	1.29	2.01	0.1	-0.28	0.31	0.53	0.43	-0.34	0.06	-0.47	-0.16	0.44	-0.25	-0.32	-0.59	-0.41	-0.45	-0.48	-0.45	-0.39	-0.44	-0.45	-0.39	-0.45	-0.48	-0.49	-0.5	-0.55	-0.4	-0.43	-0.42
DESCARTES_FETAL_LIVER_HEPATOBLASTS	-0.4	0.1	0.31	0.58	-0.26	0.27	0.65	0.74	-0.07	0.44	0.62	0.14	0.34	0.04	5.29	0.23	-0.3	-0.35	0.49	2.36	0.32	0.24	0.53	0.45	0.52	-0.38	0.41	-0.45	-0.45	0.25	-0.5	-0.38	-0.6	-0.44	-0.46	-0.47	-0.53	-0.47	-0.47	-0.49	-0.45	-0.56	-0.56	-0.54	-0.53	-0.49	-0.52	-0.47	-0.52
DESCARTES_FETAL_SPLEEN_AFP_ALB_POSITIVE_CELLS	-0.34	-0.07	0.11	0.14	-0.2	0.35	0.36	0.94	0.14	0.36	0.71	0.03	0.27	0.27	2.77	0.07	-0.21	-0.25	0.43	2.11	0.26	0.02	0.9	0.59	0.54	-0.36	0.4	-0.44	-0.22	0.26	-0.31	-0.34	-0.63	-0.47	-0.42	-0.45	-0.51	-0.45	-0.47	-0.48	-0.4	-0.54	-0.53	-0.57	-0.56	-0.53	-0.45	-0.51	-0.52
MANNO_MIDBRAIN_NEUROTYPES_BASAL	0.27	0.18	-0.02	0.2	0.39	0.16	0.71	0.3	0.75	-0.03	0.58	0.02	0.14	0.06	2.66	0.59	-0.04	0.03	0.24	1.84	0.06	0.51	0.53	-0.03	0.24	-0.29	0.07	-0.08	0.56	0.12	-0.38	-0.21	-0.38	-0.34	0.13	-0.32	-0.31	-0.12	-0.31	-0.29	-0.4	-0.39	-0.34	-0.23	-0.38	-0.29	-0.26	-0.38	-0.35
RUBENSTEIN_SKELETAL_MUSCLE_B_CELLS	0	-0.12	-0.01	0.8	0.22	0.3	-0.08	0.24	0.37	-0.1	-0.06	0.98	0.61	-0.04	2.59	0.8	-0.18	-0.14	0.35	1.35	-0.07	0.33	0.37	-0.03	-0.04	-0.22	0.07	-0.2	0.18	0.06	-0.39	-0.2	-0.62	-0.37	-0.3	-0.29	-0.33	-0.26	-0.43	-0.23	-0.27	-0.39	-0.39	-0.17	-0.38	-0.12	-0.25	-0.35	-0.28
BUSSLINGER_ESOPHAGEAL_PROLIFERATING_BASAL_CELLS	-0.19	0.29	0.17	1.09	0.09	-0.07	1.64	1.31	2.32	0.27	0.7	0.3	0.75	3.35	4.55	0.62	-0.04	-0.18	1.58	4.1	0.24	-0.08	1.44	-0.2	0.31	0.15	1.48	-0.12	0.22	0.68	-0.03	-0.24	-0.14	-0.11	-0.17	-0.18	-0.23	-0.37	0.03	-0.22	-0.25	-0.34	-0.26	-0.2	-0.12	-0.22	-0.19	-0.2	-0.2
CUI_DEVELOPING_HEART_VASCULAR_ENDOTHELIAL_CELL	-0.14	0.02	0.55	0.55	0.24	-0.08	-0.03	0.48	0.83	0	0.66	0.66	0.59	0.48	3.54	0.56	-0.24	-0.27	2.45	2.06	0.39	0.32	2.16	-0.02	0.17	-0.07	2.11	0.06	0.24	0.23	-0.26	-0.37	-0.31	-0.29	-0.3	-0.4	-0.43	-0.38	-0.44	-0.39	-0.37	-0.4	-0.43	-0.45	-0.44	-0.42	-0.41	-0.46	-0.45
HU_FETAL_RETINA_PHOTORECEPTOR	-0.3	1.53	1.18	-0.14	-0.08	0.4	0.7	0.56	1.01	-0.1	0.14	1.1	1.71	0.25	4.44	0.66	-0.29	-0.36	1.88	1.51	0.36	0.17	1.56	-0.28	0.05	0	1.9	0.32	0.24	0.35	-0.41	-0.33	-0.52	-0.46	-0.34	-0.35	-0.38	-0.36	-0.34	-0.43	-0.32	-0.48	-0.37	-0.38	-0.33	-0.44	-0.34	-0.39	-0.45
BUSSLINGER_ESOPHAGEAL_QUIESCENT_BASAL_CELLS	-0.32	-0.11	0.63	0.83	-0.04	-0.18	1.4	0.87	2	0.19	0.65	1.33	1.12	0.27	5.14	0.48	-0.23	-0.16	2.48	4.09	0.1	-0.24	1.14	0.22	-0.33	-0.44	1.58	-0.38	-0.06	-0.32	-0.11	-0.28	-0.72	-0.5	-0.4	-0.52	-0.47	-0.5	-0.39	-0.3	-0.37	-0.48	-0.27	-0.33	-0.45	-0.57	-0.39	-0.43	-0.45
GAUTAM_EYE_IRIS_CILIARY_BODY_PIGMENTED_CILIARY_BODY_CELLS	-0.14	0.15	0.79	0.36	0.02	-0.19	1.39	0.83	1.72	0.02	1.35	0.76	0.7	0.46	4.2	0.6	-0.12	-0.23	1.42	3.04	0.34	0.06	1.7	-0.36	0.04	-0.11	2.02	0.52	0	-0.13	-0.42	-0.28	-0.44	-0.31	-0.29	-0.33	-0.32	-0.32	-0.35	-0.35	-0.35	-0.48	-0.38	-0.39	-0.36	-0.26	-0.39	-0.33	-0.44
HU_FETAL_RETINA_BIPOLAR	-0.25	-0.09	0.92	0.17	-0.06	1.18	1.25	0.77	1.17	0.36	1.47	1.24	1.09	0.92	4.87	0.29	-0.38	-0.45	0.17	3.35	0.59	-0.18	2.12	-0.32	0.14	-0.14	2.18	0.51	-0.04	0.23	-0.27	-0.25	-0.57	-0.47	-0.26	-0.3	-0.39	-0.27	-0.44	-0.38	-0.34	-0.54	-0.38	-0.37	-0.39	-0.4	-0.41	-0.39	-0.47
DURANTE_ADULT_OLFACTORY_NEUROEPITHELIUM_RESPIRATORY_CILIATED_CELLS	0.27	-0.12	1.15	0.76	0.32	-0.18	1.92	0.84	1.62	0.11	0.91	1.3	1.01	1.14	3.83	2.14	-0.32	-0.31	1.6	2.64	1.05	1.95	2.09	-0.37	0.2	0.06	2.02	0.6	0.43	-0.42	-0.46	-0.35	-0.44	-0.42	-0.35	-0.43	-0.49	-0.5	-0.45	-0.45	-0.25	-0.48	-0.45	-0.52	-0.41	-0.46	-0.42	-0.45	-0.49
BUSSLINGER_GASTRIC_PARIETAL_CELLS	-0.22	0.7	0.94	1.47	1.86	0	1.61	1.32	1.02	0.84	1.91	2.04	1.33	1.3	3.93	0.67	-0.23	-0.19	2.86	3.94	0.55	0.79	1.26	-0.41	2.02	0.7	1.41	0.3	0.07	0.06	-0.28	-0.31	-0.64	-0.08	-0.42	-0.45	-0.55	-0.61	-0.38	-0.34	-0.4	-0.51	-0.47	-0.53	-0.56	-0.45	-0.45	-0.46	-0.54
DESCARTES_MAIN_FETAL_PARIETAL_AND_CHIEF_CELLS	-0.26	1.03	1.02	0.13	0.22	-0.07	0.84	0.16	0	0.2	0.14	1.74	1.18	0.37	2.7	0.65	-0.07	-0.06	4.27	4.73	0.64	0.64	2.31	-0.31	0.22	-0.14	2.19	0.72	0.04	-0.14	-0.22	-0.3	-0.53	-0.32	-0.32	-0.35	-0.39	-0.43	-0.35	-0.4	-0.32	-0.53	-0.37	-0.45	-0.47	-0.42	-0.41	-0.43	-0.43
HAY_BONE_MARROW_MONOCYTE	-0.3	0.68	1.03	0.39	-0.13	-0.02	0.92	0.37	0.21	0.12	0.65	2.18	0.95	0.52	3.95	1.02	-0.19	-0.22	3.29	4.62	1.3	1.26	2.04	-0.07	0	-0.14	1.79	0.18	0.25	-0.08	-0.21	-0.32	-0.54	-0.45	-0.45	-0.44	-0.43	-0.43	-0.45	-0.41	-0.26	-0.41	-0.35	-0.4	-0.44	-0.37	-0.31	-0.37	-0.47
TRAVAGLINI_LUNG_NONCLASSICAL_MONOCYTE_CELL	-0.37	0.37	1.2	0.01	0.11	-0.2	0.53	0.32	0.19	1.44	2.84	1.72	0.85	0.21	3.57	0.68	-0.3	-0.23	2.38	3.1	0.57	0.29	1.95	-0.11	0.03	-0.25	1.27	0.12	0.28	-0.74	-0.21	-0.35	-0.45	-0.38	-0.43	-0.39	-0.46	-0.46	-0.37	-0.44	-0.3	-0.44	-0.34	-0.42	-0.45	-0.47	-0.4	-0.45	-0.46
DESCARTES_FETAL_HEART_VISCERAL_NEURONS	-0.2	-0.21	0.5	-0.11	-0.26	-0.17	0.45	1.6	0.68	1.57	1.22	2.95	2.22	0.34	5.77	0.49	-0.09	-0.04	1.2	6.48	-0.47	-0.06	0.21	-0.25	-0.44	-0.34	4.15	-0.5	-0.13	-0.39	-0.11	-0.33	-0.34	-0.18	-0.28	-0.11	-0.28	-0.48	-0.09	-0.39	-0.32	-0.33	-0.24	-0.29	-0.45	-0.34	-0.3	-0.37	-0.37
DESCARTES_FETAL_EYE_LENS_FIBRE_CELLS	-0.35	-0.13	-0.12	0.41	-0.35	-0.26	0.38	0.51	0.6	1.2	0.42	0.24	0.51	0.2	2.64	0.13	-0.34	-0.31	0.11	1.09	0.19	-0.26	-0.05	-0.37	-0.22	-0.07	-0.09	-0.17	-0.25	-0.33	-0.36	-0.35	-0.33	-0.45	-0.34	-0.38	-0.42	-0.35	-0.26	-0.39	-0.35	-0.36	-0.38	-0.35	-0.36	-0.41	-0.41	-0.41	-0.38
DESCARTES_FETAL_ADRENAL_CHROMAFFIN_CELLS	-0.22	-0.08	0.1	2.33	-0.02	0.06	2.86	2.06	1.6	0.96	3.37	2.89	0.95	1.77	12.75	1.17	-0.1	-0.18	0.1	7.12	0.47	-0.05	0.9	-0.18	-0.24	-0.27	2.41	-0.34	0.16	-0.39	0.12	-0.22	-0.41	-0.34	-0.23	-0.26	-0.28	-0.32	-0.31	-0.34	-0.24	-0.26	-0.17	-0.29	-0.4	-0.25	-0.12	-0.27	-0.32
DESCARTES_FETAL_INTESTINE_ENS_NEURONS	-0.13	-0.38	-0.26	1.39	0.1	-0.31	0.35	1.61	0.78	1.93	2.46	3.27	2.33	1.3	8.04	1.16	-0.02	-0.08	-0.15	5.36	-0.06	-0.28	-0.13	-0.46	-0.08	-0.36	1.47	-0.29	-0.1	-0.34	-0.47	-0.26	-0.33	-0.38	-0.54	-0.4	-0.39	-0.44	-0.32	-0.34	-0.19	-0.31	-0.24	-0.3	-0.33	-0.11	0.02	-0.19	-0.31
DESCARTES_FETAL_LUNG_VISCERAL_NEURONS	-0.12	-0.41	0.14	1.56	-0.21	-0.41	1.19	3.1	2.38	2.14	2.6	2.69	2.69	1.24	10.37	0.7	-0.05	-0.19	-0.15	5.43	-0.42	-0.27	0.11	-0.42	-0.25	-0.59	3.69	-0.34	-0.19	-0.72	-0.4	-0.28	-0.28	-0.52	-0.55	-0.46	-0.41	-0.18	-0.35	-0.35	-0.34	-0.42	-0.3	-0.34	-0.31	-0.13	-0.05	-0.27	-0.2
DESCARTES_FETAL_PANCREAS_ENS_NEURONS	-0.09	-0.34	-0.18	1.32	0.27	-0.22	2.07	2.75	2.3	2.43	2.57	4.72	2.44	1.09	5.44	0.41	-0.04	-0.08	-0.16	5.48	-0.27	-0.36	-0.01	-0.37	-0.21	-0.4	1.04	-0.36	-0.14	-0.01	-0.27	-0.35	-0.14	-0.21	-0.46	-0.43	-0.35	-0.16	-0.12	-0.22	-0.22	-0.31	-0.27	-0.25	-0.29	-0.1	-0.01	-0.19	-0.28
DESCARTES_MAIN_FETAL_VISCERAL_NEURONS	-0.18	-0.38	0.37	-0.44	-0.47	-0.59	1.08	0.68	0.26	0.51	1.18	0.33	0.74	-0.17	3.4	0.46	-0.22	-0.38	-0.16	1.39	-0.68	0.02	-0.51	-0.4	-0.18	-0.61	0.4	-0.43	-0.06	-0.45	-0.19	-0.31	-0.43	-0.44	-0.69	-0.47	-0.45	-0.33	-0.07	-0.31	-0.27	-0.45	-0.39	-0.32	-0.4	-0.15	-0.13	-0.29	-0.28
DESCARTES_FETAL_MUSCLE_SMOOTH_MUSCLE_CELLS	-0.25	-0.22	-0.31	-0.25	-0.15	-0.22	-0.17	0.1	0.35	-0.18	0.08	0.17	0.21	0.49	1.6	0.06	-0.36	-0.43	-0.34	0.7	-0.36	0.25	-0.04	-0.24	-0.41	-0.41	-0.27	-0.32	-0.33	-0.2	-0.29	-0.36	-0.38	-0.37	-0.25	-0.44	-0.34	-0.35	-0.34	-0.3	-0.31	-0.32	-0.34	-0.36	-0.34	-0.29	-0.38	-0.35	-0.37
DESCARTES_FETAL_MUSCLE_SKELETAL_MUSCLE_CELLS	-0.34	2.07	0.23	-0.33	-0.34	-0.42	0.78	1.87	2.51	1.08	0.73	3.55	3.14	0.9	6.14	0.2	-0.46	-0.53	0.03	3.01	0.38	0.03	1.23	-0.12	-0.4	-0.25	0.82	-0.38	-0.23	0.95	-0.27	-0.31	-0.31	-0.51	-0.33	-0.36	-0.33	-0.47	-0.39	-0.4	-0.49	-0.44	-0.47	-0.44	-0.38	-0.42	-0.44	-0.42	-0.44
DESCARTES_FETAL_PLACENTA_MYELOID_CELLS	-0.08	-0.14	0.17	0.46	0.15	-0.05	0.73	1.53	1.98	0.29	0.74	2.52	0.47	0.75	5.57	0.34	0	-0.08	0.23	1.64	0.26	0.08	0.19	0.11	-0.1	-0.19	0	-0.03	0.08	0.31	0.02	-0.26	-0.45	-0.21	-0.23	-0.09	-0.32	-0.25	-0.21	-0.21	-0.14	-0.16	-0.2	-0.23	-0.37	0.03	-0.11	-0.27	-0.29
DESCARTES_MAIN_FETAL_SATB2_LRRC7_POSITIVE_CELLS	0.34	1.04	0.9	1.67	0.43	0.14	0.58	1.24	1.63	0.04	1.21	3.23	2.66	0.45	7.51	1.25	-0.08	-0.13	0.19	2.11	0.67	0.54	0.99	-0.3	0.03	-0.19	1.02	-0.47	0.28	0.16	0.34	-0.11	0.23	-0.26	-0.33	-0.2	-0.1	-0.25	-0.2	-0.11	-0.14	-0.34	-0.28	-0.45	-0.31	-0.22	-0.19	-0.25	-0.38
DURANTE_ADULT_OLFACTORY_NEUROEPITHELIUM_OLFACTORY_HORIZONTAL_BASAL_CELLS	-0.28	-0.06	-0.07	-0.08	-0.32	-0.36	0.07	-0.02	0.5	-0.22	0.05	1.31	0.58	0.16	2.41	0.07	-0.28	-0.18	0.08	0.67	-0.23	-0.22	0.08	-0.04	-0.14	-0.33	0.11	-0.25	-0.29	-0.25	-0.25	-0.31	-0.35	-0.4	-0.41	-0.45	-0.39	-0.42	-0.38	-0.31	-0.46	-0.42	-0.41	-0.42	-0.48	-0.42	-0.51	-0.46	-0.47
BUSSLINGER_GASTRIC_LYZ_POSITIVE_CELLS	0.31	-0.17	0.03	-0.17	0.05	-0.1	-0.07	0.16	0.22	-0.06	1.11	1.24	1.14	0.18	3.77	1.45	-0.25	-0.16	0.15	1.54	0.71	0.34	0.16	-0.27	-0.13	-0.41	0.01	-0.3	-0.1	0.06	-0.51	-0.33	-0.39	-0.38	-0.38	-0.22	-0.37	-0.24	-0.44	-0.25	-0.26	-0.42	-0.44	-0.28	-0.37	-0.31	-0.38	-0.4	-0.39
DESCARTES_MAIN_FETAL_PDE1C_ACSM3_POSITIVE_CELLS	-0.11	-0.02	0.47	0.9	0.57	0.19	0.68	0.63	1.09	0.36	1.82	1.82	2.15	0.21	6.5	2.05	-0.11	0.06	0.68	2.61	1.48	0.25	0.59	-0.17	0.4	-0.22	0.1	-0.32	0.27	0.9	0.21	-0.22	-0.3	-0.37	-0.34	-0.32	-0.35	-0.34	-0.21	-0.22	-0.06	-0.3	-0.33	-0.24	-0.35	-0.34	-0.39	-0.27	-0.33
HAY_BONE_MARROW_NAIVE_T_CELL	-0.1	-0.04	0.1	0.52	0.41	0.28	0.68	1.13	1.19	0.34	1.78	1.46	2.69	0.24	5.75	0.98	-0.16	-0.09	0.66	2.85	0.1	0.53	0.77	0.25	1.46	0.24	0.1	-0.36	0.32	0.54	0.04	-0.27	-0.57	-0.35	-0.32	-0.27	-0.27	-0.19	-0.34	-0.31	-0.28	-0.21	-0.21	-0.3	-0.36	-0.15	-0.27	-0.32	-0.34
AIZARANI_LIVER_C34_MHC_II_POS_B_CELLS	0.2	0.14	0.4	0.47	0.2	0.68	0.6	1.13	1.07	0.47	1.82	1.86	1.15	0.8	5.82	0.91	-0.28	-0.2	0.13	1.83	0.17	0.33	0.66	0.21	0.08	-0.31	0.36	-0.35	0.04	1.89	-0.29	-0.27	-0.44	-0.41	-0.07	-0.41	-0.34	-0.19	-0.21	-0.21	-0.33	-0.17	-0.27	-0.43	-0.38	-0.07	-0.06	-0.3	-0.21
DESCARTES_MAIN_FETAL_RETINAL_PIGMENT_CELLS	-0.2	0.05	0.39	-0.03	-0.06	-0.25	0.19	0.64	0.22	0.22	1.2	1.59	1.73	0.31	6.38	0.69	-0.35	-0.32	-0.37	2.53	0.08	0.29	0.58	-0.07	-0.02	-0.24	-0.14	-0.31	-0.08	0.5	-0.18	-0.29	-0.24	-0.22	-0.22	-0.43	-0.26	-0.2	-0.31	-0.23	-0.35	-0.49	-0.22	-0.37	-0.21	-0.23	-0.22	-0.36	-0.35
ZHONG_PFC_C2_SOX5_BCL11B_POS_EXCITATORY_NEURON	-0.03	-0.18	-0.16	0.08	-0.18	-0.23	-0.13	1.18	1.32	0.4	2.14	1.7	1.44	1.48	8.5	0.62	-0.44	-0.32	-0.15	3.1	-0.36	-0.28	0.39	-0.17	-0.11	-0.34	-0.15	-0.32	-0.15	1.16	0.06	-0.26	-0.31	-0.18	-0.23	-0.24	-0.15	-0.3	-0.14	-0.31	-0.31	-0.23	-0.29	-0.35	-0.33	-0.33	-0.21	-0.32	-0.35
DURANTE_ADULT_OLFACTORY_NEUROEPITHELIUM_IMMATURE_NEURONS	-0.24	0.24	0.62	0.81	0.23	-0.09	1.49	1.31	1.7	0.53	1.25	0.51	2.16	0.96	7.59	1.14	0.09	0.02	1.27	2.36	0.47	-0.04	1.38	-0.35	0.02	-0.35	1.38	0.21	0.18	-0.31	-0.33	-0.37	-0.43	-0.4	-0.4	-0.45	-0.52	-0.37	-0.11	-0.35	-0.44	-0.44	-0.43	-0.43	-0.42	-0.27	-0.2	-0.31	-0.43
DURANTE_ADULT_OLFACTORY_NEUROEPITHELIUM_MATURE_NEURONS	-0.36	0.02	0.73	0.78	-0.23	-0.38	1.07	1.4	1.28	0.65	0.94	0.61	2.2	1.11	6.63	1.12	-0.04	0.1	1.25	1.61	0.16	-0.39	1.18	-0.22	1.42	-0.06	1.3	0.22	0.28	-0.5	-0.7	-0.3	-0.66	-0.63	-0.54	-0.53	-0.52	-0.51	-0.23	-0.44	-0.46	-0.5	-0.47	-0.5	-0.42	-0.28	-0.24	-0.33	-0.47
DESCARTES_FETAL_CEREBRUM_ASTROCYTES	-0.16	0.09	1.65	0.04	-0.32	-0.34	1.54	0.2	0.11	-0.13	0.42	1.34	1.62	-0.01	7.59	0.72	-0.17	-0.28	0.48	3.69	0.74	0	0.57	-0.18	-0.25	-0.34	0.54	-0.33	-0.33	0.32	-0.01	-0.33	-0.57	-0.34	-0.34	-0.36	-0.28	-0.4	-0.31	-0.36	-0.25	-0.33	-0.3	-0.4	-0.33	-0.29	-0.34	-0.34	-0.33
DESCARTES_MAIN_FETAL_CORNEAL_AND_CONJUNCTIVAL_EPITHELIAL_CELLS	-0.15	0.21	0.62	0.65	0.05	0.03	0.44	0.52	0.53	-0.12	0.32	1.03	1.86	0.61	6.91	2.39	-0.15	0.09	2.03	3.43	0.38	0.49	0.9	-0.09	-0.02	-0.29	0.22	-0.35	-0.08	-0.01	-0.02	-0.21	-0.26	-0.3	-0.07	-0.27	-0.35	-0.4	-0.48	-0.4	-0.31	-0.33	-0.32	-0.34	-0.41	-0.28	-0.32	-0.39	-0.37
GAUTAM_EYE_IRIS_CILIARY_BODY_MONOCYTES	0.11	0.51	0.57	-0.06	-0.24	0.08	0.76	0.51	0.31	-0.05	0.72	0.89	1.01	0.14	7.45	1.64	-0.18	-0.13	1	3.14	1.17	0.24	0.84	-0.17	-0.2	0	0.1	-0.31	-0.14	-0.34	-0.07	-0.22	-0.45	-0.21	-0.15	-0.36	-0.43	-0.57	-0.19	-0.31	-0.45	-0.53	-0.41	-0.45	-0.39	-0.41	-0.43	-0.37	-0.4
GAO_LARGE_INTESTINE_ADULT_CE_OLFM4HIGH_STEM_CELL	-0.17	0.54	0.35	0.82	0.12	0.06	0.79	1.52	1.47	0.12	0.64	0.81	1.18	0.22	6.83	0.99	-0.07	-0.19	1.48	1.99	0.54	0.06	1.11	-0.31	-0.21	-0.3	0.36	-0.41	-0.27	0.22	0.01	-0.33	-0.08	-0.35	-0.31	-0.22	-0.32	-0.35	-0.28	-0.33	-0.3	-0.34	-0.33	-0.3	-0.38	-0.28	-0.33	-0.37	-0.31
GAUTAM_EYE_CORNEA_MONOCYTES	0.03	1.1	1	0.48	0.03	0	0.28	0.59	0.83	0.12	1.06	0.87	1.51	0.28	7.53	1.05	-0.2	-0.37	0.81	2.41	0.5	0.43	1.27	-0.36	-0.28	-0.3	-0.08	-0.34	0.07	1.09	-0.09	-0.29	-0.55	-0.31	-0.08	-0.3	-0.28	-0.38	-0.4	-0.32	-0.28	-0.34	-0.29	-0.39	-0.34	-0.31	-0.36	-0.38	-0.34
VANGURP_PANCREATIC_BETA_CELL	-0.25	-0.37	-0.24	0.26	-0.31	-0.32	1.09	0.32	0.08	-0.23	0.79	0.52	1.07	0.69	5.68	0.78	-0.36	-0.36	0.86	4.18	0.08	1.02	0.73	-0.32	0.52	-0.06	0.38	-0.35	-0.17	-0.14	-0.29	-0.31	-0.51	-0.43	-0.47	-0.42	-0.35	-0.37	-0.41	-0.39	-0.37	-0.46	-0.43	-0.42	-0.38	-0.38	-0.38	-0.4	-0.42
DESCARTES_MAIN_FETAL_THYMOCYTES	-0.22	-0.33	-0.21	0.47	0.74	0.12	0.93	0.69	0.29	-0.01	0.24	0.75	2.01	0.45	4.15	0.68	-0.35	-0.37	-0.08	0.21	0.12	-0.09	0.13	-0.21	0.05	-0.25	-0.03	-0.24	-0.19	-0.37	0.3	-0.24	-0.32	-0.06	-0.13	-0.23	-0.2	-0.21	-0.22	-0.24	0.03	-0.18	-0.26	-0.27	-0.39	-0.26	-0.25	-0.33	-0.36
CUI_DEVELOPING_HEART_RIGHT_ATRIAL_CARDIOMYOCYTE	-0.29	-0.04	0.51	-0.06	0.1	0.03	0.19	0.01	0.15	0.06	-0.08	1.61	1.94	-0.21	4.69	1.32	-0.38	-0.39	0.01	1.12	0.01	0.57	0.65	-0.26	-0.12	-0.18	0.74	-0.43	-0.33	-0.38	-0.17	-0.35	-0.36	-0.35	-0.24	-0.42	-0.24	-0.42	-0.43	-0.34	-0.3	-0.39	-0.38	-0.4	-0.41	-0.36	-0.39	-0.41	-0.37
DESCARTES_FETAL_PANCREAS_LYMPHATIC_ENDOTHELIAL_CELLS	-0.19	0.26	1.16	0.12	0.07	-0.17	0.9	0.28	0.85	0.23	-0.02	1.28	1.85	-0.16	4.92	0.68	-0.2	-0.31	-0.16	1.02	0.23	0.02	-0.14	-0.39	-0.18	-0.4	-0.12	-0.43	-0.16	-0.25	-0.19	-0.36	-0.38	-0.45	-0.26	-0.35	-0.19	-0.34	-0.32	-0.28	-0.34	-0.4	-0.37	-0.47	-0.42	-0.29	-0.39	-0.44	-0.39
DESCARTES_MAIN_FETAL_PAEP_MECOM_POSITIVE_CELLS	-0.15	-0.08	0.16	0.73	-0.12	-0.17	2.43	0.79	1.51	0.15	0.4	1.48	3.07	1.15	6.65	3.07	-0.09	-0.12	0.31	2.39	0.92	0.31	0.63	-0.04	0.3	-0.23	0.84	-0.13	-0.03	-0.02	-0.02	-0.23	-0.43	-0.41	-0.27	-0.25	-0.27	-0.35	-0.27	-0.33	-0.3	-0.32	-0.3	-0.27	-0.27	-0.26	-0.31	-0.33	-0.27
HU_FETAL_RETINA_HORIZONTAL	0.78	0.52	-0.03	0.09	0.06	-0.12	0.42	1.12	1.92	0.81	1.47	1.54	3.97	0.02	6.6	2	-0.06	0.08	-0.04	1.17	0.85	0.47	0	-0.39	-0.27	-0.36	-0.01	-0.26	0.5	-0.17	-0.03	-0.26	0.05	-0.01	-0.25	-0.27	-0.37	-0.32	0.14	-0.2	-0.14	-0.31	-0.27	-0.11	-0.12	-0.08	0.07	-0.06	-0.16
TRAVAGLINI_LUNG_B_CELL	0.52	0.07	0.05	0.56	0.2	0.56	0.44	1.53	1.65	0.72	1.47	2.09	2.78	0.61	6.11	2.31	-0.27	-0.44	-0.2	1.44	0.64	1.62	0.83	-0.17	0.23	-0.08	-0.01	-0.24	0.14	0.11	-0.28	-0.27	-0.48	-0.3	-0.16	-0.37	-0.37	-0.33	-0.25	-0.05	-0.24	-0.38	-0.3	-0.37	-0.38	-0.27	-0.31	-0.36	-0.28
DESCARTES_FETAL_PANCREAS_ISLET_ENDOCRINE_CELLS	0.01	0.04	0.62	0.76	-0.16	-0.27	3.44	2.19	1.5	0.96	1.4	1	0.93	0.33	6.17	0.45	-0.07	-0.15	0.69	2.68	0.01	0.5	1.19	0.06	-0.08	-0.31	0.16	-0.26	-0.28	0.62	-0.15	-0.28	-0.18	-0.44	-0.49	-0.32	-0.37	-0.3	-0.38	-0.11	-0.23	-0.18	-0.19	-0.32	-0.31	-0.45	-0.43	-0.32	-0.33
DESCARTES_MAIN_FETAL_CILIATED_EPITHELIAL_CELLS	0.19	0.17	0.01	0.21	-0.04	-0.16	2.33	1.33	1.81	0.06	0.6	1.33	1.81	0.08	6.12	0.66	-0.12	-0.13	1.93	2.87	-0.14	-0.09	0.84	-0.23	-0.07	0.18	-0.09	-0.31	0.05	0.52	-0.08	-0.25	-0.4	-0.23	-0.29	-0.25	-0.27	-0.17	-0.15	-0.22	-0.22	-0.17	-0.24	-0.3	-0.32	-0.22	-0.16	-0.22	-0.27
DESCARTES_MAIN_FETAL_SYNCYTIOTROPHOBLASTS_AND_VILLOUS_CYTOTROPHOBLASTS	-0.02	1.41	0.44	0.67	0.39	0.65	1.34	1.71	3.17	1.06	1.31	1.7	1.9	1.86	4.45	0.59	-0.05	-0.07	-0.14	1.5	-0.01	0.13	0.11	-0.14	0.27	-0.21	-0.1	-0.14	-0.07	0.5	0.19	-0.22	0.11	-0.07	-0.15	-0.34	-0.27	-0.19	-0.16	-0.12	-0.12	-0.18	-0.19	-0.08	-0.31	-0.1	-0.16	-0.26	-0.21
DESCARTES_FETAL_MUSCLE_ERYTHROBLASTS	-0.14	0.28	0.33	0.8	0.42	-0.05	0.68	0.78	0.98	0.03	0.32	0.74	1.6	0.61	2.5	0.66	-0.28	-0.33	0.07	0.74	0.07	0.17	0.48	-0.33	-0.11	-0.28	0.21	-0.29	-0.12	0.06	-0.36	-0.25	-0.56	-0.24	-0.24	-0.2	-0.24	-0.43	-0.25	-0.31	-0.12	-0.39	-0.33	-0.42	-0.35	-0.3	-0.28	-0.33	-0.44
DESCARTES_FETAL_INTESTINE_CHROMAFFIN_CELLS	-0.3	0.8	0.58	0.32	-0.13	-0.31	1.29	1.33	2.17	0.55	1.18	1.42	3.91	-0.24	4.49	0.67	-0.29	-0.32	0.34	2.08	-0.19	0	0.46	-0.44	-0.26	-0.26	0.48	-0.37	-0.19	0.26	-0.06	-0.36	-0.54	-0.38	-0.36	-0.38	-0.33	-0.43	-0.36	-0.42	-0.36	-0.48	-0.4	-0.43	-0.36	-0.32	-0.39	-0.34	-0.36
LAKE_ADULT_KIDNEY_C25_ENDOTHELIAL_CELLS_UNASSIGNED	-0.24	0.06	0.13	0.76	0.05	-0.04	1.32	1.4	2.13	0.47	0.83	1.57	2.6	-0.07	4.37	0.66	-0.36	-0.37	0.06	2.21	-0.23	0.4	0.33	-0.27	-0.39	-0.26	0.06	-0.33	-0.33	0.19	-0.03	-0.32	-0.31	-0.27	-0.27	-0.23	-0.38	-0.35	-0.4	-0.3	-0.36	-0.37	-0.31	-0.33	-0.36	-0.25	-0.31	-0.38	-0.43
MURARO_PANCREAS_PANCREATIC_POLYPEPTIDE_CELL	-0.11	0.05	0.08	0.66	0.32	-0.12	1.51	1.23	2.57	0.23	0.98	0.62	3.39	-0.18	4.64	1.55	-0.2	-0.05	0.24	1.26	0.16	0.29	0.28	-0.22	-0.29	-0.28	-0.34	-0.24	-0.15	-0.21	-0.04	-0.29	-0.39	-0.11	-0.45	-0.34	-0.39	-0.26	-0.26	-0.18	-0.24	-0.47	-0.35	-0.2	-0.32	-0.26	-0.18	-0.25	-0.29
FAN_EMBRYONIC_CTX_BIG_GROUPS_EXCITATORY_NEURON	-0.21	0.57	0.48	0.3	-0.12	-0.16	2.77	2.61	3.89	0.22	1.13	1.75	2.7	-0.07	6.82	0.28	-0.19	-0.43	-0.21	2.16	0.3	0.34	0.14	-0.29	0.03	-0.1	-0.11	-0.4	-0.07	-0.1	0.05	-0.24	-0.27	-0.35	-0.29	-0.4	-0.03	-0.31	-0.35	-0.23	-0.22	-0.42	-0.38	-0.27	-0.34	-0.34	-0.37	-0.33	-0.37
DESCARTES_FETAL_MUSCLE_SCHWANN_CELLS	-0.35	0.23	0.45	0.45	0.44	-0.29	0.86	0.77	2.08	-0.12	0.92	0.42	1.07	0.29	2.98	0.79	-0.32	-0.35	-0.13	0.82	-0.13	-0.23	0.39	-0.19	-0.31	-0.38	-0.13	-0.29	-0.36	0.32	-0.24	-0.32	-0.42	-0.36	-0.4	-0.46	-0.43	-0.41	-0.37	-0.37	-0.3	-0.38	-0.37	-0.41	-0.42	-0.39	-0.36	-0.42	-0.44
HAY_BONE_MARROW_PRO_B	0.22	0.42	0.53	0.96	0.5	0.26	1.12	2.2	3.42	0.45	1.57	1.38	2.76	0.37	5.8	1.98	-0.09	0.1	0.23	2.3	0.58	0.9	0.57	-0.32	0.43	0.23	0.45	-0.2	0.49	0.87	-0.08	-0.26	-0.19	-0.23	-0.07	-0.03	-0.2	-0.31	-0.08	-0.13	-0.17	-0.35	-0.27	-0.22	-0.18	0	-0.23	-0.2	-0.23
LAKE_ADULT_KIDNEY_C14_DISTAL_CONVOLUTED_TUBULE	-0.22	0.1	-0.02	0.07	-0.2	-0.17	1.14	1.43	1.97	0.28	1.13	1.02	1.67	0.71	4.17	0.78	-0.35	-0.21	-0.06	1.3	0.12	-0.06	0.58	0	-0.06	-0.19	-0.07	-0.14	-0.27	0.38	-0.18	-0.29	-0.21	-0.35	-0.31	-0.27	-0.24	-0.34	-0.22	-0.3	-0.32	-0.31	-0.33	-0.33	-0.34	-0.33	-0.31	-0.32	-0.35
MANNO_MIDBRAIN_NEUROTYPES_HNBML5	0.22	0.23	0.2	0.97	0.47	-0.07	1.24	3.33	3.9	0.72	2.36	2.56	3.22	1.01	6.85	1.66	-0.34	-0.27	0.09	2.21	-0.04	0.37	0.21	-0.39	0.01	-0.44	-0.08	-0.42	-0.05	-0.55	-0.07	-0.33	-0.46	-0.39	-0.32	-0.43	-0.47	-0.44	-0.19	-0.41	-0.4	-0.32	-0.41	-0.42	-0.42	-0.25	-0.28	-0.34	-0.41
DESCARTES_MAIN_FETAL_THYMIC_EPITHELIAL_CELLS	-0.19	-0.49	-0.29	-0.25	-0.3	-0.19	1.12	0.4	0.89	0.07	0.08	0.46	0.74	0.06	1.58	0.48	-0.26	-0.41	-0.25	0.82	-0.27	-0.25	0.21	-0.37	-0.18	-0.42	-0.45	-0.51	-0.41	0.06	-0.08	-0.28	-0.38	-0.39	-0.41	-0.45	-0.38	-0.28	-0.18	-0.3	-0.4	-0.29	-0.27	-0.44	-0.43	-0.29	-0.4	-0.38	-0.39
TRAVAGLINI_LUNG_CD8_MEMORY_EFFECTOR_T_CELL	-0.2	-0.31	-0.09	-0.18	0.01	-0.14	0.91	0.42	0.77	-0.02	0.49	0.46	0.95	-0.2	1.75	0.75	-0.17	-0.24	-0.11	0.86	-0.15	-0.08	0.34	-0.23	-0.36	-0.28	-0.25	-0.3	0.12	-0.04	-0.19	-0.23	-0.25	-0.41	-0.3	-0.26	-0.13	-0.21	-0.21	-0.34	-0.27	-0.28	-0.3	-0.26	-0.34	-0.27	-0.16	-0.3	-0.33
CUI_DEVELOPING_HEART_LEFT_VENTRICULAR_CARDIOMYOCYTE	-0.29	0.47	0.54	1.85	0.91	0.2	0.35	0.12	0.15	0.18	0.13	0.86	0.9	-0.12	5.21	1.87	0.12	-0.09	4.67	5.57	0.65	2.86	2.52	0.04	-0.24	-0.38	-0.01	-0.15	-0.27	-0.22	-0.25	-0.34	-0.42	-0.33	-0.18	-0.31	-0.31	-0.32	-0.39	-0.35	-0.29	-0.41	-0.29	-0.42	-0.43	-0.4	-0.39	-0.41	-0.41
DESCARTES_FETAL_PLACENTA_IGFBP1_DKK1_POSITIVE_CELLS	-0.34	0.46	0.63	1.98	0.33	-0.05	-0.21	0.85	0.69	-0.1	0.05	0.82	0.18	1.46	4.08	1.13	-0.23	-0.3	2.96	2.26	0.48	1.95	1.65	-0.3	-0.03	-0.4	-0.21	-0.45	-0.27	-0.58	-0.12	-0.38	-0.36	-0.4	-0.32	-0.4	-0.35	-0.45	-0.46	-0.42	-0.4	-0.43	-0.44	-0.46	-0.41	-0.46	-0.42	-0.47	-0.46
DESCARTES_MAIN_FETAL_IGFBP1_DKK1_POSITIVE_CELLS	-0.28	0.91	0.64	1.74	0.11	-0.01	0	0.64	0.56	-0.11	0.57	0.08	0.03	0.34	4.34	1.36	-0.2	-0.24	3.26	3.15	0.27	2.06	1.55	-0.26	-0.41	-0.44	0.21	-0.39	-0.28	-0.48	-0.06	-0.36	-0.42	-0.4	-0.28	-0.43	-0.41	-0.45	-0.44	-0.46	-0.45	-0.44	-0.42	-0.44	-0.41	-0.42	-0.44	-0.46	-0.47
AIZARANI_LIVER_C2_KUPFFER_CELLS_1	-0.11	0.28	1.83	0.85	0.07	-0.21	0.17	1.39	2.49	0.41	1.44	1.21	1.65	0.5	5.49	1.29	-0.02	-0.11	3.6	5.11	0.47	1.44	2.08	-0.13	-0.18	-0.17	-0.1	-0.2	-0.16	-0.41	-0.25	-0.28	-0.43	-0.29	-0.27	-0.33	-0.43	-0.39	-0.4	-0.39	-0.31	-0.43	-0.39	-0.46	-0.5	-0.38	-0.41	-0.47	-0.42
BUSSLINGER_ESOPHAGEAL_DENDRITIC_CELLS	-0.03	0.26	1.53	1.2	0.02	-0.04	0.26	0.69	1.24	0.38	1.05	1.07	1.05	0.76	5.03	2.34	-0.03	-0.14	3.53	4.62	0.76	2.3	2.55	-0.26	-0.39	-0.15	0.08	-0.22	-0.25	-0.31	-0.26	-0.38	-0.62	-0.43	-0.37	-0.4	-0.4	-0.51	-0.42	-0.4	-0.41	-0.43	-0.42	-0.44	-0.47	-0.47	-0.44	-0.45	-0.42
GAO_LARGE_INTESTINE_ADULT_CI_MESENCHYMAL_CELLS	-0.21	0.11	1.73	1.39	0.22	0.12	-0.05	0.09	0.24	-0.05	0.66	1.04	1.04	0.93	4.38	1.05	0	-0.27	2.46	2.87	0.37	1.35	1.9	-0.18	-0.38	-0.28	0.55	-0.26	-0.29	-0.45	-0.16	-0.37	-0.47	-0.37	-0.32	-0.38	-0.46	-0.41	-0.41	-0.34	-0.38	-0.41	-0.38	-0.38	-0.41	-0.37	-0.37	-0.39	-0.37
DURANTE_ADULT_OLFACTORY_NEUROEPITHELIUM_FIBROBLASTS_STROMAL_CELLS	0.05	0.49	2.2	1.41	0.09	0.11	0.78	1.07	1.79	0.45	0.44	1.21	1.45	0.81	3.68	0.85	-0.3	-0.45	2.44	3.8	0.24	1.22	2.01	-0.15	-0.49	-0.41	0.22	-0.37	-0.06	-0.54	-0.24	-0.33	-0.55	-0.45	-0.45	-0.56	-0.44	-0.38	-0.36	-0.39	-0.44	-0.47	-0.41	-0.41	-0.46	-0.46	-0.45	-0.41	-0.43
FAN_OVARY_CL17_PUTATIVE_APOPTOTIC_SMOOTH_MUSCLE_CELL	-0.23	1.31	2.36	1.6	-0.09	-0.22	1	1.15	1.79	0.52	1.79	1.22	1.88	0.89	3.47	1.52	-0.17	-0.29	2.2	5.28	0.63	1.32	1.89	-0.33	-0.37	-0.37	-0.11	-0.33	-0.11	-0.13	-0.35	-0.36	-0.47	-0.42	-0.43	-0.41	-0.47	-0.47	-0.31	-0.31	-0.42	-0.45	-0.38	-0.37	-0.43	-0.38	-0.36	-0.38	-0.39
DURANTE_ADULT_OLFACTORY_NEUROEPITHELIUM_DENDRITIC_CELLS	-0.22	0.18	1.41	0.76	0.04	-0.24	0.53	0.18	0.82	-0.05	0.76	1.04	0.8	0.01	3.67	0.88	-0.01	-0.22	4.13	3.24	0.51	0.5	2.47	-0.16	-0.55	-0.27	0.01	-0.53	0.14	-0.3	0.12	-0.25	-0.78	-0.46	-0.44	-0.54	-0.42	-0.37	-0.4	-0.45	-0.36	-0.46	-0.47	-0.46	-0.47	-0.54	-0.4	-0.44	-0.48
HAY_BONE_MARROW_IMMATURE_NEUTROPHIL	-0.24	0.31	0.51	3.67	0.61	0.51	1.11	1.11	1.46	1.62	1.35	2.57	2.45	3.37	7.14	1.92	0.06	-0.14	5.03	7.96	0.52	1.95	2.66	0.05	-0.21	0.32	0.19	0.09	0.23	0.06	-0.06	-0.27	-0.49	-0.39	-0.38	-0.31	-0.43	-0.48	-0.3	-0.33	-0.26	-0.39	-0.34	-0.46	-0.35	-0.27	-0.39	-0.43	-0.37
DESCARTES_FETAL_LUNG_MESOTHELIAL_CELLS	-0.28	1.24	0.41	0.82	-0.22	-0.39	0.66	1.3	0.5	0.6	1.19	0.55	1.05	0.24	5.04	0.53	0.26	0.29	2.75	1.22	-0.2	1.25	1.22	-0.22	-0.16	-0.25	0.17	-0.38	-0.11	-0.41	0	-0.32	-0.58	-0.36	-0.43	-0.29	-0.17	-0.49	-0.23	-0.26	-0.18	-0.44	-0.32	-0.43	-0.32	-0.28	-0.41	-0.35	-0.33
DURANTE_ADULT_OLFACTORY_NEUROEPITHELIUM_MAST_CELLS	-0.26	0.28	1.91	1.13	0.02	-0.09	0.33	0.96	0.86	-0.01	3.01	0.45	1.46	-0.16	6.51	0.62	0.33	0.13	5.34	4.37	-0.05	0.48	0.84	-0.1	-0.4	-0.15	-0.24	-0.32	-0.22	-0.26	-0.48	-0.35	-0.44	-0.35	-0.33	-0.23	-0.35	-0.35	-0.39	-0.28	-0.47	-0.36	-0.37	-0.47	-0.5	-0.41	-0.42	-0.44	-0.47
GAO_LARGE_INTESTINE_24W_C11_PANETH_LIKE_CELL	-0.39	0.62	1.63	1.02	0	-0.19	0.92	1.68	2.34	1.64	2.95	1.33	1.72	0.36	4.78	0.71	0.03	0.04	3.08	2.99	0.17	0.1	0.98	-0.36	-0.41	-0.38	-0.17	-0.39	-0.23	-0.44	-0.4	-0.38	-0.51	-0.42	-0.4	-0.39	-0.43	-0.48	-0.44	-0.4	-0.35	-0.42	-0.4	-0.42	-0.46	-0.47	-0.43	-0.45	-0.45
BUSSLINGER_GASTRIC_OXYNTIC_ENTEROCHROMAFFIN_LIKE_CELLS	-0.23	0.07	-0.06	-0.04	-0.24	-0.05	0.72	0.35	0.84	0.05	0.34	0.11	1.66	0.65	2.73	2.14	-0.15	-0.13	1.2	1.66	-0.28	-0.08	-0.12	-0.44	-0.05	-0.37	-0.36	-0.44	-0.23	-0.33	-0.22	-0.36	-0.39	-0.44	-0.22	-0.37	-0.42	-0.4	-0.41	-0.39	-0.41	-0.51	-0.45	-0.47	-0.5	-0.44	-0.4	-0.44	-0.45
DESCARTES_MAIN_FETAL_CCL19_CCL21_POSITIVE_CELLS	-0.2	-0.04	-0.11	0.81	-0.06	-0.17	0.2	1.34	0.69	-0.15	1.77	1.53	1.05	-0.11	5.21	3.41	-0.34	-0.31	0.75	2.56	-0.11	0.86	0.64	-0.1	-0.03	-0.36	0.03	-0.32	-0.05	-0.04	-0.45	-0.29	-0.41	-0.45	-0.32	-0.33	-0.34	-0.47	-0.48	-0.32	-0.36	-0.45	-0.42	-0.38	-0.44	-0.41	-0.35	-0.43	-0.42
ZHENG_CORD_BLOOD_C10_MULTILYMPHOID_PROGENITOR	-0.21	0.03	0.25	1.31	0.24	0.15	0.6	0.6	1.06	0.06	2.21	1.89	1.36	0.06	3.99	2.18	-0.15	-0.34	1.31	2.41	-0.05	0.64	-0.1	-0.25	0.55	-0.25	0	-0.1	0.37	0.05	0.11	-0.26	-0.42	-0.41	-0.31	-0.21	-0.37	-0.34	-0.35	-0.28	-0.27	-0.41	-0.37	-0.4	-0.31	-0.37	-0.32	-0.36	-0.27
DESCARTES_FETAL_LIVER_MYELOID_CELLS	-0.11	-0.18	0.18	0.1	-0.26	-0.26	1.97	0.79	1.99	0.07	1.5	3.68	4.08	-0.1	5.26	1.44	0.1	0.06	3.92	2.39	0.64	0.1	0.67	-0.23	-0.28	-0.26	-0.21	-0.38	-0.11	0.48	-0.17	-0.34	-0.3	-0.37	-0.26	-0.32	-0.32	-0.32	-0.44	-0.4	-0.26	-0.35	-0.36	-0.38	-0.39	-0.38	-0.33	-0.38	-0.37
MANNO_MIDBRAIN_NEUROTYPES_HOMTN	0.36	-0.23	-0.13	1.02	-0.13	-0.32	1.77	2.35	2.4	1.37	2.02	3.6	3.21	1.33	5.78	2.55	0.45	0.48	3.53	4.49	1	0.21	-0.3	-0.1	1.3	-0.48	0.13	-0.33	0.4	-0.18	-0.33	-0.31	-0.22	-0.47	-0.43	-0.4	-0.49	-0.37	-0.3	-0.36	-0.33	-0.38	-0.42	-0.39	-0.26	-0.28	-0.13	-0.27	-0.37
TRAVAGLINI_LUNG_ALVEOLAR_EPITHELIAL_TYPE_2_CELL	-0.3	-0.08	0	0.11	0.46	0.15	0.16	0.95	0.65	-0.11	1.55	3.05	1.97	-0.15	3.57	0.11	-0.16	-0.23	2.06	3.56	0.3	0.11	0.19	-0.36	-0.22	0.02	-0.37	-0.47	0.02	-0.08	0.26	-0.33	-0.62	-0.41	-0.39	-0.3	-0.33	-0.47	-0.3	-0.42	-0.38	-0.46	-0.54	-0.5	-0.47	-0.44	-0.38	-0.46	-0.39
AIZARANI_LIVER_C28_NK_NKT_CELLS_6	-0.32	0.51	1.95	0.87	0.36	0.19	0.83	0.94	1.47	0.2	1.53	1.24	1.83	0.23	5.36	0.75	-0.19	-0.23	1.23	4.39	-0.07	-0.07	2.59	-0.28	-0.38	-0.31	-0.12	-0.36	-0.21	-0.44	-0.34	-0.35	-0.47	-0.27	-0.28	-0.41	-0.35	-0.41	-0.35	-0.43	-0.32	-0.38	-0.41	-0.4	-0.4	-0.41	-0.36	-0.4	-0.42
AIZARANI_LIVER_C3_NK_NKT_CELLS_2	-0.1	0.15	0.24	1.08	0.37	0.33	0.67	1.15	1.82	0.4	0.96	1.67	2.18	0.32	4.49	1.21	-0.04	0	2.09	4.62	-0.1	0.09	2.25	0.02	-0.3	-0.3	0.1	-0.23	-0.03	-0.21	-0.12	-0.32	-0.37	-0.34	-0.36	-0.31	-0.22	-0.45	-0.39	-0.3	-0.35	-0.38	-0.33	-0.28	-0.45	-0.29	-0.31	-0.4	-0.43
BUSSLINGER_DUODENAL_IMMUNE_CELLS	-0.15	0.49	1.73	1.47	0.49	0.17	1	0.78	1.04	0.37	1.86	1.88	1.52	0.56	4.42	2.1	-0.16	-0.13	2.24	4.49	0.4	1.72	1.17	-0.24	0.17	-0.12	0.12	-0.26	-0.09	0.04	0.02	-0.33	-0.42	-0.32	-0.3	-0.38	-0.43	-0.41	-0.31	-0.25	-0.35	-0.36	-0.29	-0.26	-0.44	-0.27	-0.28	-0.27	-0.3
BUSSLINGER_GASTRIC_IMMUNE_CELLS	-0.1	0.78	1.76	1.38	0.64	0.19	1.1	1.14	1.35	0.39	1.86	2	1.97	0.49	5.77	1.97	0.27	0.21	3.54	5.72	0.53	1.26	1.24	-0.14	-0.03	-0.21	0.05	-0.26	0.04	0.3	0.06	-0.3	-0.51	-0.3	-0.33	-0.37	-0.47	-0.49	-0.27	-0.31	-0.4	-0.39	-0.3	-0.29	-0.42	-0.29	-0.25	-0.29	-0.32
CUI_DEVELOPING_HEART_C8_MACROPHAGE	-0.27	1.56	2.26	1.46	0.31	0.28	0.24	0.99	2.15	0.39	1.69	2.72	2.78	0.55	6.34	2.4	-0.1	-0.22	2.4	5.47	0.61	0.66	1.41	-0.28	-0.42	-0.28	0.08	-0.3	-0.02	-0.22	-0.31	-0.33	-0.51	-0.4	-0.29	-0.35	-0.41	-0.4	-0.36	-0.35	-0.35	-0.41	-0.37	-0.46	-0.38	-0.41	-0.37	-0.44	-0.42
FAN_EMBRYONIC_CTX_OLIG	-0.19	1.13	0.94	0.77	0.42	0.44	0.95	1.73	1.8	0.03	1.22	1.75	2.09	0.12	5.4	1.95	-0.31	-0.3	1.67	5.59	0.54	1.14	0.54	-0.23	-0.24	-0.34	-0.04	-0.35	-0.22	-0.05	-0.37	-0.36	-0.3	-0.38	-0.39	-0.29	-0.29	-0.37	-0.31	-0.33	-0.33	-0.42	-0.41	-0.38	-0.37	-0.32	-0.39	-0.4	-0.41
DESCARTES_MAIN_FETAL_TROPHOBLAST_GIANT_CELLS	-0.3	0.69	0.56	0.13	-0.14	-0.22	0.29	0.42	0.39	-0.21	0.87	1.05	0.95	0.08	3.33	0.54	-0.31	-0.34	1	3.67	0.44	0.09	0.75	-0.31	-0.26	-0.3	-0.32	-0.39	-0.18	-0.33	0.04	-0.32	-0.54	-0.4	-0.34	-0.33	-0.33	-0.38	-0.41	-0.27	-0.43	-0.42	-0.37	-0.42	-0.41	-0.39	-0.35	-0.42	-0.42
GAUTAM_EYE_IRIS_CILIARY_BODY_ACTIVATED_T_CELLS	-0.25	0.51	0.91	0.52	-0.03	-0.19	0.88	0.47	0.72	0.24	1.89	2.18	1.17	1.27	6.85	1.14	-0.14	-0.03	2.09	5.46	0.05	0.4	1.03	-0.09	-0.02	-0.1	-0.05	-0.23	0.05	-0.63	-0.33	-0.21	-0.25	-0.32	-0.35	-0.24	-0.34	-0.11	-0.21	-0.25	-0.35	-0.4	-0.32	-0.33	-0.37	-0.36	-0.31	-0.34	-0.35
HAY_BONE_MARROW_DENDRITIC_CELL	1.02	0.14	2	1.97	-0.07	-0.23	0.74	0.79	0.94	0.02	1.38	2.23	1.79	0.99	4.6	0.89	-0.26	-0.4	1.03	4.61	0.7	0.13	0.83	-0.4	-0.29	-0.31	-0.21	-0.28	-0.31	-0.54	-0.36	-0.36	-0.5	-0.49	-0.48	-0.42	-0.47	-0.42	-0.43	-0.5	-0.47	-0.52	-0.46	-0.49	-0.41	-0.45	-0.39	-0.47	-0.42
DESCARTES_FETAL_CEREBELLUM_MICROGLIA	0.78	1.16	1.59	0.11	-0.09	-0.14	1.17	1.08	1.62	0.16	1.21	1.4	1.85	-0.13	4.33	0.67	-0.08	-0.1	2.23	3.48	0.09	-0.1	0.81	0.41	-0.3	-0.45	-0.24	-0.35	-0.16	0.3	0.03	-0.36	-0.44	-0.35	-0.4	-0.39	-0.44	-0.38	-0.38	-0.38	-0.31	-0.36	-0.4	-0.42	-0.42	-0.36	-0.35	-0.4	-0.39
ZHONG_PFC_MAJOR_TYPES_MICROGLIA	0.2	0.99	1.74	0.39	-0.04	-0.05	0.83	1.14	1.91	0.29	1.35	1.82	1.6	-0.14	3.63	0.82	-0.16	-0.14	2.84	3.17	0.51	0	0.7	0.19	-0.47	-0.42	-0.12	-0.45	-0.18	0.18	-0.11	-0.4	-0.59	-0.38	-0.38	-0.39	-0.46	-0.43	-0.37	-0.41	-0.35	-0.52	-0.44	-0.47	-0.39	-0.43	-0.4	-0.4	-0.45
FAN_EMBRYONIC_CTX_BIG_GROUPS_MICROGLIA	0.02	0.38	1.42	0.32	-0.06	-0.01	0.4	1.14	1.95	0.25	1.43	1.54	1.54	0.22	3.5	0.74	-0.33	-0.33	1.68	3.08	0.53	-0.1	0.7	0.27	-0.46	-0.32	-0.19	-0.42	-0.14	0.3	-0.19	-0.39	-0.5	-0.36	-0.41	-0.4	-0.44	-0.42	-0.41	-0.38	-0.36	-0.51	-0.46	-0.5	-0.42	-0.38	-0.38	-0.44	-0.43
HU_FETAL_RETINA_MICROGLIA	-0.15	1.16	2.26	1.11	0.15	0.1	0.58	2.03	2.81	0.63	2.08	1.88	2.32	0.35	4.26	1.18	-0.12	-0.14	2.79	5.02	0.76	0.25	1.03	-0.12	-0.37	-0.33	-0.16	-0.39	-0.04	0.03	-0.26	-0.34	-0.54	-0.37	-0.29	-0.37	-0.43	-0.47	-0.38	-0.38	-0.3	-0.36	-0.38	-0.45	-0.45	-0.35	-0.36	-0.4	-0.41
MANNO_MIDBRAIN_NEUROTYPES_HMGL	-0.39	1.3	1.62	0.49	-0.04	-0.09	0.17	1.26	1.95	0.24	1.39	1.75	1.79	0.1	3.43	0.65	-0.31	-0.32	1.73	3.61	0.2	-0.22	0.31	0.03	-0.39	-0.43	-0.28	-0.38	-0.26	0.13	-0.01	-0.38	-0.57	-0.42	-0.41	-0.4	-0.47	-0.49	-0.45	-0.38	-0.38	-0.47	-0.47	-0.5	-0.51	-0.43	-0.46	-0.44	-0.45
MURARO_PANCREAS_ACINAR_CELL	0.42	1.2	1.59	0.63	0.31	-0.08	0.66	1.15	1.43	0.53	1.22	1.91	2.46	0.56	4.09	0.86	-0.24	-0.16	2.77	4.13	0.03	0.19	0.38	-0.13	-0.03	-0.13	0	-0.44	-0.08	-0.14	-0.18	-0.35	-0.42	-0.43	-0.33	-0.38	-0.47	-0.43	-0.36	-0.34	-0.33	-0.37	-0.37	-0.4	-0.45	-0.38	-0.37	-0.37	-0.39
TRAVAGLINI_LUNG_PLATELET_MEGAKARYOCYTE_CELL	-0.3	1.03	1.84	0.51	0.12	-0.16	0.47	1.18	1.69	0.26	0.95	1.46	2.02	1.01	3.69	1.42	-0.38	-0.36	2.89	3.38	-0.14	-0.21	0.81	-0.36	-0.08	-0.25	-0.09	-0.31	-0.27	-0.35	-0.31	-0.4	-0.48	-0.36	-0.41	-0.42	-0.42	-0.48	-0.31	-0.43	-0.36	-0.39	-0.43	-0.43	-0.47	-0.35	-0.41	-0.4	-0.39
MANNO_MIDBRAIN_NEUROTYPES_HENDO	-0.37	1.82	2.46	1.58	0.7	0.07	0.52	1.2	1.52	0.77	1.47	1.9	1.75	0.55	4.61	1.23	-0.08	-0.07	2.82	4.72	1.3	0.04	0.44	-0.08	0.07	-0.28	0.07	-0.4	-0.28	-0.26	-0.34	-0.37	-0.59	-0.46	-0.39	-0.41	-0.46	-0.48	-0.44	-0.41	-0.33	-0.41	-0.41	-0.46	-0.43	-0.44	-0.37	-0.41	-0.41
FAN_OVARY_CL18_B_LYMPHOCYTE	0.81	0.76	1.95	0.78	0.2	0.12	1.01	1.48	2.08	0.31	2.05	2.02	2.04	0.11	4.46	0.95	-0.28	-0.29	1.62	3.59	0.49	0.44	1.52	-0.47	-0.11	-0.13	-0.11	-0.23	0.18	0.2	-0.16	-0.3	-0.63	-0.43	-0.44	-0.33	-0.44	-0.57	-0.24	-0.47	-0.35	-0.45	-0.45	-0.47	-0.47	-0.3	-0.34	-0.42	-0.39
TRAVAGLINI_LUNG_CILIATED_CELL	-0.01	0.69	2.18	0.87	1.14	-0.1	0.95	2.36	2.52	1.28	2.65	1.62	2.49	1.7	5.32	2.07	-0.08	-0.11	3.72	5.21	1.25	0.93	2.44	-0.34	-0.09	0.05	1.09	0	-0.15	-0.05	-0.22	-0.4	-0.47	-0.2	-0.31	-0.33	-0.41	-0.5	-0.31	-0.41	-0.41	-0.38	-0.42	-0.44	-0.47	-0.38	-0.4	-0.42	-0.48
TRAVAGLINI_LUNG_PROXIMAL_CILIATED_CELL	0.18	1.09	2.28	1.17	1.02	0.01	0.98	2.13	2.73	0.92	2.16	1.6	2.02	1.17	5.16	1.9	-0.1	-0.06	2.55	5.16	0.93	0.62	1.59	-0.3	0.69	0.13	0.49	-0.05	-0.05	0.28	-0.12	-0.35	-0.48	-0.23	-0.33	-0.32	-0.49	-0.5	-0.19	-0.38	-0.38	-0.41	-0.36	-0.46	-0.5	-0.36	-0.37	-0.36	-0.4
DURANTE_ADULT_OLFACTORY_NEUROEPITHELIUM_VASCULAR_SMOOTH_MUSCLE_CELLS	0	0.57	1.72	0.04	-0.25	-0.3	0.4	1.03	1.72	0.37	1.02	1.6	1.89	0.96	3.52	0.88	-0.38	-0.39	0.48	4.26	0.73	-0.21	0.85	-0.35	-0.3	-0.43	-0.27	-0.48	-0.15	0.35	-0.45	-0.36	-0.42	-0.51	-0.46	-0.45	-0.44	-0.43	-0.45	-0.49	-0.42	-0.42	-0.44	-0.45	-0.5	-0.39	-0.39	-0.44	-0.48
MANNO_MIDBRAIN_NEUROTYPES_HRGL1	-0.16	0.67	1.16	1.47	0.35	0.21	0.52	1.68	2.51	0.38	1.24	1.85	1.5	1.08	5.32	0.33	-0.34	-0.34	1.56	4.19	0.9	0.18	0.84	-0.39	-0.2	-0.41	0.39	-0.35	-0.27	-0.26	-0.26	-0.41	-0.51	-0.36	-0.39	-0.45	-0.39	-0.43	-0.38	-0.4	-0.41	-0.48	-0.47	-0.46	-0.45	-0.45	-0.41	-0.42	-0.44
MANNO_MIDBRAIN_NEUROTYPES_HRGL2B	-0.31	0.86	2.13	1.34	0.24	0.06	0.51	1.73	2.25	0.25	0.74	1.4	1.88	1.04	5.32	1.04	-0.27	-0.2	0.95	4.08	0.37	0.39	0.64	-0.2	0.53	-0.16	0.61	-0.41	-0.36	-0.48	-0.5	-0.3	-0.45	-0.55	-0.42	-0.47	-0.46	-0.54	-0.39	-0.47	-0.48	-0.37	-0.46	-0.55	-0.54	-0.49	-0.43	-0.46	-0.47
MANNO_MIDBRAIN_NEUROTYPES_HRGL2A	-0.18	1.03	2.19	1.12	0.15	-0.01	0.31	1.42	2.12	0.16	1.61	2.13	1.89	0.69	4.94	0.66	-0.36	-0.31	0.8	4.67	0.82	0.02	0.31	-0.37	-0.38	-0.29	0.18	-0.42	-0.31	-0.48	-0.31	-0.39	-0.52	-0.46	-0.37	-0.47	-0.44	-0.49	-0.46	-0.41	-0.46	-0.39	-0.46	-0.46	-0.46	-0.44	-0.43	-0.45	-0.42
MANNO_MIDBRAIN_NEUROTYPES_HRGL3	0.03	1.21	2.25	0.86	0.19	-0.08	0.32	1.33	2.18	0.01	1.4	1.59	1.3	1.33	4.8	0.6	-0.2	-0.29	2.2	5.12	0.67	0.44	0.54	-0.36	-0.23	-0.34	-0.02	-0.24	-0.28	-0.33	-0.36	-0.4	-0.46	-0.41	-0.43	-0.45	-0.4	-0.42	-0.4	-0.38	-0.36	-0.41	-0.44	-0.41	-0.43	-0.43	-0.42	-0.41	-0.43
LAKE_ADULT_KIDNEY_C6_PROXIMAL_TUBULE_EPITHELIAL_CELLS_FIBRINOGEN_POS_S3	0.69	0.61	1.64	0.17	-0.11	-0.22	0.87	1.89	2.47	0.36	1.84	1	0.94	0.82	4.54	1.75	-0.38	-0.34	1.6	5.22	0.18	0.19	0.48	-0.27	-0.38	-0.35	-0.14	-0.35	0.07	-0.57	-0.18	-0.38	-0.45	-0.52	-0.48	-0.41	-0.41	-0.42	-0.4	-0.44	-0.5	-0.5	-0.44	-0.45	-0.41	-0.34	-0.45	-0.41	-0.49
AIZARANI_LIVER_C25_KUPFFER_CELLS_4	-0.07	0.36	1.53	0.68	-0.01	-0.28	0.14	1.58	3	0.47	1.61	1.52	1.92	0.39	6.28	0.5	0.04	0.02	3.8	5.68	0.8	-0.08	0.29	-0.16	-0.26	-0.13	0	-0.24	-0.19	-0.41	-0.44	-0.29	-0.27	-0.32	-0.17	-0.36	-0.46	-0.39	-0.44	-0.4	-0.27	-0.43	-0.36	-0.44	-0.47	-0.37	-0.39	-0.47	-0.44
TRAVAGLINI_LUNG_BASOPHIL_MAST_2_CELL	0.06	0.53	1.31	0.55	-0.06	-0.13	0.8	2.02	2.58	0.46	1.97	1.7	2.7	0.44	6.24	1.96	0.04	0.03	3.58	5.38	0.08	0.23	0.63	-0.28	-0.27	-0.28	0.17	-0.26	-0.09	0.05	-0.28	-0.33	-0.44	-0.44	-0.22	-0.29	-0.41	-0.4	-0.32	-0.31	-0.33	-0.44	-0.36	-0.38	-0.41	-0.33	-0.29	-0.33	-0.34
ZHENG_CORD_BLOOD_C5_SIMILAR_TO_HSC_C6_PUTATIVE_ALTERED_METABOLIC_STATE	0.11	-0.02	0.17	0.23	-0.06	0.08	0.47	0.67	1.47	-0.17	1.79	1.09	1.55	-0.36	4.84	0.98	-0.12	-0.22	2.11	3.8	0	0.94	0.57	-0.21	-0.27	-0.19	0.04	-0.18	0.17	0.49	-0.26	-0.32	-0.51	-0.39	-0.39	-0.39	-0.36	-0.32	-0.35	-0.33	-0.38	-0.48	-0.41	-0.44	-0.39	-0.4	-0.34	-0.4	-0.38
TRAVAGLINI_LUNG_PROLIFERATING_BASAL_CELL	-0.01	0.39	0.82	1.46	0.77	0.32	1.23	2.31	3.12	0.45	1.71	1.16	1.83	0.62	4.7	1.18	0.58	0.26	3.06	4.79	1.04	0.59	1.29	-0.32	0.75	0.17	0.43	-0.39	-0.09	1.12	-0.04	-0.23	-0.37	-0.17	-0.28	-0.24	-0.29	-0.4	-0.21	-0.29	-0.27	-0.3	-0.38	-0.3	-0.43	-0.12	-0.25	-0.26	-0.26
TRAVAGLINI_LUNG_PROXIMAL_BASAL_CELL	-0.05	0.67	1.14	1.51	0.78	0.27	1.02	1.7	2.83	0.48	1.31	1.15	1.68	0.76	5.37	1.2	-0.15	0	2.71	5.77	0.89	0.21	0.02	-0.24	1.04	-0.03	0.35	-0.46	0.06	0.27	-0.19	-0.29	-0.56	-0.18	-0.36	-0.33	-0.44	-0.47	-0.34	-0.3	-0.35	-0.35	-0.36	-0.35	-0.49	-0.31	-0.35	-0.35	-0.42
BUSSLINGER_DUODENAL_LATE_IMMATURE_ENTEROCYTES	-0.03	1.52	0.92	0.93	0.3	-0.01	1.25	1.28	0.87	0.06	0.98	0.93	2.08	0.68	5.02	0.6	-0.2	-0.14	1.93	3.29	0.11	-0.21	-0.07	-0.14	-0.01	-0.19	-0.28	-0.35	0.15	-0.47	0.13	-0.33	-0.58	-0.51	-0.48	-0.5	-0.36	-0.51	-0.36	-0.44	-0.35	-0.54	-0.48	-0.44	-0.49	-0.42	-0.45	-0.46	-0.43
MANNO_MIDBRAIN_NEUROTYPES_HOPC	-0.34	1.02	1.76	1.62	0.37	0.31	0	1.39	1.3	0.53	1.25	1.29	1.36	0.33	6.65	1.09	-0.26	-0.22	2.87	3.61	0.05	0.64	0.39	-0.36	-0.11	-0.18	0.37	-0.35	-0.36	-0.16	-0.13	-0.38	-0.43	-0.45	-0.45	-0.41	-0.4	-0.38	-0.49	-0.4	-0.4	-0.45	-0.43	-0.46	-0.48	-0.46	-0.37	-0.41	-0.46
GAO_LARGE_INTESTINE_ADULT_CJ_IMMUNE_CELLS	-0.17	1.7	2.95	0.7	0.07	-0.15	0.23	1.52	2.27	0.21	1.08	1.11	1.65	0.87	4.47	0.28	-0.19	-0.29	1.77	2.74	0.32	-0.33	0.18	0.07	-0.39	-0.45	0.69	-0.34	-0.41	-0.07	-0.18	-0.36	-0.5	-0.45	-0.46	-0.48	-0.48	-0.36	-0.32	-0.43	-0.37	-0.46	-0.46	-0.46	-0.45	-0.36	-0.36	-0.41	-0.41
HU_FETAL_RETINA_RPE	-0.17	0.75	1.7	0.46	-0.13	-0.28	0.41	0.92	1.54	0.3	0.59	1.25	1.54	0.78	3.77	0.25	-0.37	-0.45	2.21	2.1	0.19	0.3	0.64	0.12	-0.38	-0.4	0.08	-0.41	-0.17	0.05	-0.24	-0.39	-0.54	-0.49	-0.48	-0.44	-0.45	-0.44	-0.46	-0.44	-0.38	-0.52	-0.48	-0.47	-0.51	-0.46	-0.5	-0.49	-0.42
HAY_BONE_MARROW_STROMAL	0.44	1.63	2.69	1.22	-0.03	-0.23	0.39	1.43	1.98	0.08	0.48	1.98	1.98	0.33	5.78	1.33	-0.2	-0.28	2.12	3.3	0.99	-0.26	0.04	-0.05	-0.31	-0.4	-0.11	-0.42	-0.36	-0.02	-0.12	-0.4	-0.47	-0.41	-0.43	-0.43	-0.47	-0.43	-0.43	-0.45	-0.42	-0.45	-0.47	-0.47	-0.47	-0.47	-0.44	-0.46	-0.45
MANNO_MIDBRAIN_NEUROTYPES_HRGL2C	-0.27	1.21	1.53	0.55	0.09	-0.38	0.14	1.49	2.36	0.06	0.94	1.78	1.29	0.2	5.31	0.67	-0.46	-0.39	0.41	2.07	0.4	0.26	0.72	-0.43	-0.24	-0.3	0.56	-0.43	-0.44	-0.32	-0.31	-0.4	-0.27	-0.44	-0.51	-0.39	-0.39	-0.51	-0.51	-0.51	-0.49	-0.44	-0.52	-0.55	-0.52	-0.49	-0.43	-0.47	-0.5
MURARO_PANCREAS_ALPHA_CELL	0.09	2	2.07	0.88	0.1	-0.28	0.75	2.25	3.22	0.25	1.09	1.39	2.46	0.38	6.5	0.46	-0.09	-0.13	1.78	3.15	0.17	-0.06	1.48	-0.44	-0.29	-0.14	0.98	0.14	0.05	-0.03	-0.35	-0.35	-0.5	-0.4	-0.36	-0.45	-0.53	-0.38	-0.07	-0.42	-0.32	-0.47	-0.39	-0.47	-0.46	-0.22	-0.36	-0.37	-0.42
DESCARTES_FETAL_THYMUS_THYMIC_EPITHELIAL_CELLS	-0.24	0.68	0.51	0.3	-0.04	-0.12	1.2	1.18	2.89	0.4	1.01	1.5	3.03	0.39	4.77	0.6	-0.38	-0.3	1.05	6.04	0.39	0.19	0.91	-0.34	-0.12	-0.25	1.09	-0.34	-0.28	-0.06	-0.38	-0.31	-0.33	-0.23	-0.28	-0.34	-0.3	-0.27	-0.47	-0.32	-0.29	-0.27	-0.4	-0.38	-0.36	-0.34	-0.32	-0.36	-0.42
HAY_BONE_MARROW_CD34_POS_MKP	-0.19	0.57	0.03	-0.21	-0.2	-0.29	0.33	0.98	1.44	0.38	0.4	1.06	1.71	0.15	2.93	0.38	-0.26	-0.24	0.17	3.06	-0.12	-0.26	0.77	-0.36	-0.29	-0.25	-0.26	-0.31	-0.23	-0.24	-0.13	-0.31	-0.35	-0.34	-0.35	-0.35	-0.34	-0.36	-0.31	-0.33	-0.35	-0.36	-0.35	-0.35	-0.37	-0.31	-0.33	-0.34	-0.34
GAUTAM_EYE_IRIS_CILIARY_BODY_CILIARY_BODY_ENDOTHELIAL_CELLS	-0.1	0.05	0.19	0.78	0.49	0.05	2.26	1.27	1.93	0.35	0.92	2.41	4.07	1.07	4.56	1.14	-0.08	0.02	1.14	4.56	0.32	0.05	0.69	-0.34	-0.18	-0.08	0.12	-0.29	-0.01	-0.14	-0.33	-0.21	-0.37	-0.36	-0.3	-0.27	-0.42	-0.33	-0.28	-0.24	-0.25	-0.2	-0.27	-0.37	-0.36	-0.13	-0.21	-0.26	-0.34
TRAVAGLINI_LUNG_AIRWAY_SMOOTH_MUSCLE_CELL	-0.32	-0.22	0.25	0.18	0.1	-0.02	0.46	0.67	1.38	0.3	0.78	1.73	2.6	1.01	3	0.51	-0.28	-0.34	1.39	4	0.72	0.19	1.03	-0.24	-0.07	-0.3	-0.23	-0.33	-0.18	-0.41	-0.28	-0.35	-0.36	-0.37	-0.32	-0.34	-0.44	-0.38	-0.32	-0.31	-0.36	-0.39	-0.41	-0.33	-0.43	-0.33	-0.35	-0.39	-0.39
RUBENSTEIN_SKELETAL_MUSCLE_SMOOTH_MUSCLE_CELLS	-0.09	-0.31	0.17	1.77	-0.06	0.02	1.06	1.18	1.7	0.29	1.57	1.74	1.94	1.01	4.36	0.77	-0.27	-0.28	0.92	4.33	0.92	0.91	1.69	-0.39	1.01	0.02	0.79	0.02	-0.07	-0.14	-0.4	-0.35	-0.49	-0.41	-0.38	-0.41	-0.46	-0.47	-0.35	-0.36	-0.45	-0.5	-0.39	-0.45	-0.49	-0.38	-0.38	-0.35	-0.4
AIZARANI_LIVER_C6_KUPFFER_CELLS_2	-0.31	0.22	0.75	0.48	0.01	-0.18	0.64	1.9	2.83	0.49	1.84	2.9	3.18	0.11	6.37	1.09	-0.24	-0.33	2.66	3.45	0.22	0.22	1.47	-0.17	-0.23	-0.26	-0.06	-0.27	-0.09	-0.5	-0.2	-0.3	-0.42	-0.35	-0.33	-0.28	-0.41	-0.43	-0.43	-0.4	-0.34	-0.4	-0.4	-0.44	-0.49	-0.38	-0.45	-0.49	-0.46
DESCARTES_MAIN_FETAL_MEGAKARYOCYTES	-0.23	0.23	0.15	0.73	0.38	0.19	0.84	1.64	3.08	1.01	1.47	3.06	3.33	0.17	6.89	1.25	-0.05	-0.3	1.59	3.08	0.7	0.97	3.03	-0.26	0.12	-0.09	0.11	-0.23	-0.23	-0.07	-0.26	-0.27	-0.56	-0.1	-0.23	-0.29	-0.3	-0.34	-0.24	-0.42	-0.24	-0.32	-0.34	-0.26	-0.24	-0.27	-0.36	-0.35	-0.31
ZHENG_CORD_BLOOD_C1_PUTATIVE_MEGAKARYOCYTE_PROGENITOR	-0.33	-0.19	-0.2	-0.06	0.12	-0.09	0.62	1.89	2.15	0.48	1	1.62	3.37	-0.04	4.11	0.15	-0.34	-0.22	1.41	3.38	0.27	-0.07	1.51	-0.34	-0.13	-0.39	-0.08	-0.29	-0.23	-0.32	-0.36	-0.32	-0.36	-0.36	-0.4	-0.37	-0.34	-0.4	-0.29	-0.33	-0.37	-0.36	-0.38	-0.43	-0.4	-0.37	-0.4	-0.4	-0.42
BUSSLINGER_GASTRIC_G_CELLS	-0.22	0.15	0.91	0.52	-0.08	0.12	1.15	1.52	2.49	0.4	1.31	1.17	3.47	0.87	4.08	1.02	-0.08	-0.21	2.78	3.34	1.02	0.58	1.2	-0.15	-0.1	-0.3	-0.22	-0.2	-0.22	-0.19	-0.19	-0.34	-0.41	-0.4	-0.34	-0.38	-0.26	-0.25	-0.37	-0.32	-0.33	-0.48	-0.32	-0.37	-0.38	-0.39	-0.33	-0.4	-0.36
LAKE_ADULT_KIDNEY_C20_COLLECTING_DUCT_INTERCALATED_CELLS_TYPE_A_CORTEX	-0.17	0.46	0.31	0.59	0.09	0	1.75	1.77	2.39	0.59	1.54	1.95	2.79	1.35	6.54	2.18	-0.2	-0.04	4.37	3.91	1.8	0.23	1.99	-0.23	0.37	-0.1	0.09	-0.26	-0.26	0.05	0.01	-0.31	-0.18	-0.28	-0.03	-0.27	-0.22	-0.22	-0.22	-0.41	-0.31	-0.27	-0.24	-0.37	-0.32	-0.29	-0.23	-0.32	-0.31
TRAVAGLINI_LUNG_VASCULAR_SMOOTH_MUSCLE_CELL	-0.29	-0.16	-0.25	-0.13	0.04	-0.08	0.42	0.72	1.53	0.31	0.5	0.81	1.43	0.57	3.52	0.51	-0.28	-0.28	1.26	2.07	0.59	-0.04	0.95	-0.32	-0.33	-0.31	0.13	-0.3	-0.25	-0.06	-0.36	-0.34	-0.37	-0.36	-0.31	-0.36	-0.32	-0.33	-0.31	-0.35	-0.31	-0.33	-0.33	-0.35	-0.35	-0.35	-0.34	-0.35	-0.36
FAN_EMBRYONIC_CTX_EX_4_EXCITATORY_NEURON	-0.22	0.02	0.14	0.73	0.04	-0.05	0.45	0.69	1.51	0	0.8	0.73	2.35	-0.01	3.94	0.43	0.12	-0.03	1.55	1.39	-0.14	0.36	1.14	-0.36	-0.14	-0.24	0.08	-0.23	-0.35	-0.11	-0.29	-0.34	-0.36	-0.19	-0.28	-0.38	-0.34	-0.31	-0.32	-0.3	-0.26	-0.33	-0.34	-0.37	-0.38	-0.28	-0.33	-0.36	-0.34
AIZARANI_LIVER_C30_HEPATOCYTES_4	0.01	0.44	0.39	0.13	-0.09	-0.01	0.91	2.15	2.94	0.33	2.35	1.78	2.24	0.29	6.68	0.87	-0.22	-0.39	1.1	3.48	-0.1	-0.01	0.07	-0.21	-0.34	-0.27	0.88	-0.28	-0.16	0.08	-0.26	-0.39	-0.36	-0.14	-0.24	-0.33	-0.37	-0.42	-0.35	-0.26	-0.28	-0.43	-0.29	-0.28	-0.42	-0.29	-0.27	-0.38	-0.35
GAUTAM_EYE_IRIS_CILIARY_BODY_MEG3_HIGH_FIBROBLASTS	-0.26	-0.08	-0.04	-0.13	-0.23	-0.28	0.72	0.75	1.25	0.4	1.51	0.59	1.49	-0.06	5.69	0.59	-0.38	-0.24	1.22	3.05	0.66	-0.06	0.06	-0.27	-0.34	-0.38	-0.06	-0.42	-0.4	-0.16	-0.25	-0.37	-0.37	-0.44	-0.45	-0.37	-0.33	-0.33	-0.4	-0.28	-0.41	-0.42	-0.42	-0.44	-0.46	-0.44	-0.38	-0.4	-0.42
GOBP_PANCREAS_DEVELOPMENT	-0.32	0	0.18	-0.15	-0.13	-0.28	1.04	1.57	2.2	0.1	1.13	0.86	1.19	-0.27	5.87	0.62	-0.21	-0.18	1.02	2.95	0.59	0.14	0.12	-0.17	-0.36	-0.33	-0.23	-0.35	-0.34	-0.3	-0.33	-0.36	-0.46	-0.4	-0.4	-0.46	-0.31	-0.43	-0.37	-0.43	-0.33	-0.49	-0.34	-0.38	-0.41	-0.42	-0.41	-0.37	-0.41
GAUTAM_EYE_IRIS_CILIARY_BODY_WIF1_HIGH_FIBROBLASTS	-0.12	0.11	0.25	0.43	0.18	-0.01	1.08	1.18	2.19	0.18	1.02	0.41	0.8	0.42	5.53	1.46	-0.3	-0.16	0.89	3.29	0.12	0.14	0.29	-0.24	-0.18	-0.31	0	-0.33	0.14	-0.43	-0.33	-0.28	-0.48	-0.37	-0.42	-0.31	-0.41	-0.33	-0.37	-0.39	-0.32	-0.37	-0.44	-0.26	-0.42	-0.26	-0.46	-0.39	-0.44
GAUTAM_EYE_IRIS_CILIARY_BODY_PUTATIVE_STEM_CELLS	0.03	0.53	0.99	0.79	0.16	0.02	1.08	1.29	1.36	0.47	1.85	1.69	2.88	0.2	5.46	1.2	-0.14	-0.16	1.12	3.29	-0.09	0.18	0.35	-0.33	0.01	-0.07	0.78	-0.27	-0.12	0	-0.17	-0.29	-0.13	-0.31	-0.26	-0.32	-0.29	-0.49	-0.23	-0.31	-0.19	-0.33	-0.26	-0.3	-0.29	-0.29	-0.34	-0.31	-0.27
LAKE_ADULT_KIDNEY_C21_COLLECTING_DUCT_INTERCALATED_CELLS_TYPE_B	-0.16	0.58	0.72	0.45	0.2	0.12	1.15	1.48	2	0.53	2.77	2.51	2.82	0.99	7.63	1.9	-0.25	-0.15	0.68	3.77	0.16	0.52	0.49	-0.2	0.65	-0.17	-0.23	-0.37	-0.21	0.06	0.33	-0.28	-0.31	-0.34	-0.09	-0.18	-0.2	-0.29	-0.04	-0.38	-0.11	-0.09	-0.24	-0.3	-0.23	-0.27	-0.28	-0.35	-0.4
MANNO_MIDBRAIN_NEUROTYPES_HDA2	0.33	0.14	0.25	0.94	0.08	-0.26	1.09	2.93	2.3	1.29	3.07	1.73	2.48	0.84	6.52	1.57	-0.03	-0.11	1.18	4.04	0.16	0.39	0.08	-0.44	-0.52	-0.59	-0.11	-0.39	-0.1	-0.34	-0.29	-0.37	-0.13	-0.41	-0.42	-0.49	-0.55	-0.48	-0.29	-0.32	-0.36	-0.53	-0.38	-0.42	-0.37	-0.26	-0.17	-0.3	-0.34
MANNO_MIDBRAIN_NEUROTYPES_HDA1	0.31	0.17	0.6	1.02	0.27	-0.15	1.59	2.86	3.51	1.26	2.68	2.4	3.48	1.09	7.02	1.65	-0.16	-0.15	0.89	3.61	0.21	0.44	0.2	-0.33	-0.23	-0.46	-0.1	-0.35	-0.15	-0.67	-0.3	-0.35	-0.35	-0.34	-0.36	-0.43	-0.41	-0.42	-0.21	-0.38	-0.34	-0.41	-0.35	-0.35	-0.33	-0.29	-0.28	-0.3	-0.36
MANNO_MIDBRAIN_NEUROTYPES_HNBGABA	0.41	0.27	0.58	1.44	0.18	-0.04	1.56	2.88	3.6	1.37	3.58	2.82	3.28	1.15	9.06	2.43	-0.19	-0.18	0.73	4.31	0.37	0.45	0.22	-0.3	-0.19	-0.41	-0.06	-0.29	-0.06	-0.33	-0.24	-0.32	-0.17	-0.43	-0.36	-0.27	-0.34	-0.36	-0.01	-0.21	-0.32	-0.39	-0.28	-0.35	-0.24	-0.11	-0.15	-0.24	-0.24
MANNO_MIDBRAIN_NEUROTYPES_HGABA	0.15	0.06	0.08	1.09	0.24	-0.2	1.35	2.88	3.45	1.07	2.88	2.58	2.61	0.88	7.98	2.12	0.23	0.07	2.33	3.58	0.44	0.11	0.43	-0.27	-0.22	-0.39	-0.23	-0.28	-0.03	-0.1	0	-0.32	-0.2	-0.38	-0.22	-0.28	-0.44	-0.32	-0.11	-0.3	-0.21	-0.42	-0.3	-0.33	-0.25	-0.17	-0.23	-0.26	-0.25
MANNO_MIDBRAIN_NEUROTYPES_HSERT	-0.01	-0.01	0.04	0.91	-0.01	-0.24	1.4	2.11	2.28	1.09	2.37	1.4	2.6	0.93	6.46	0.27	0.02	-0.07	1.49	3.12	-0.13	-0.12	0.3	-0.44	-0.23	-0.39	-0.23	-0.31	-0.23	-0.51	-0.29	-0.33	-0.25	-0.29	-0.45	-0.44	-0.49	-0.39	-0.29	-0.3	-0.36	-0.26	-0.33	-0.39	-0.35	-0.23	-0.18	-0.26	-0.35
MANNO_MIDBRAIN_NEUROTYPES_HDA	0.21	0.54	0.72	0.97	0.22	-0.09	0.9	2.4	2.14	1.3	2.93	2.17	2.62	1.03	9.13	1.48	0.07	0.03	1.21	3.66	0.42	0.62	-0.26	-0.39	-0.26	-0.39	0.11	-0.25	0.18	-0.48	-0.22	-0.31	-0.14	-0.43	-0.4	-0.38	-0.44	-0.37	-0.19	-0.26	-0.28	-0.43	-0.31	-0.33	-0.29	-0.21	-0.17	-0.27	-0.32
ZHONG_PFC_C3_ASTROCYTE	-0.23	0.08	0.39	1.73	0.39	-0.18	0.66	1.72	1.84	0.79	2.22	1.31	1.86	0.23	6.84	1.4	-0.12	-0.1	1.04	2.71	0.45	0.17	0.67	-0.19	-0.17	-0.14	-0.01	-0.34	-0.2	-0.03	0.11	-0.35	-0.47	-0.2	-0.25	-0.32	-0.32	-0.4	-0.36	-0.31	-0.24	-0.31	-0.3	-0.39	-0.39	-0.35	-0.34	-0.37	-0.33
FAN_EMBRYONIC_CTX_BIG_GROUPS_CAJAL_RETZIUS	-0.24	0.08	0.61	1.27	1.28	-0.25	1.03	1.97	1.64	0.52	1.42	1.36	2.35	0.46	6.43	1.45	-0.29	-0.24	1.21	4.58	0.54	1.02	0.76	-0.35	0.93	0.04	-0.19	-0.45	-0.28	-0.28	-0.36	-0.36	-0.63	-0.31	-0.37	-0.47	-0.5	-0.5	-0.41	-0.43	-0.48	-0.41	-0.48	-0.49	-0.48	-0.49	-0.47	-0.48	-0.52
MURARO_PANCREAS_BETA_CELL	0.15	-0.09	0.47	0.92	1.03	0	1.32	2.21	2.74	1.13	3.39	1.76	2.21	0.73	6.94	2.29	0	-0.09	2.07	5.34	0.8	0.75	0.74	-0.15	0.78	-0.15	0.19	-0.27	0.17	0.09	-0.19	-0.33	-0.39	-0.28	-0.31	-0.33	-0.42	-0.44	-0.22	-0.38	-0.32	-0.38	-0.31	-0.38	-0.31	-0.16	-0.26	-0.32	-0.33
HU_FETAL_RETINA_RGC	0.3	0.35	0.17	1.08	0.18	0.06	1.28	1.29	1.59	0.72	1.77	1.85	2.61	0.72	7.18	1.43	0.69	0.37	2.95	5.03	0.55	0.07	-0.15	-0.23	0.3	-0.37	-0.15	-0.2	0.03	0.01	-0.2	-0.32	-0.44	-0.14	-0.35	-0.39	-0.49	-0.5	-0.2	-0.38	-0.42	-0.3	-0.43	-0.39	-0.42	-0.2	-0.2	-0.33	-0.36
MANNO_MIDBRAIN_NEUROTYPES_HNBML1	0.18	0.57	0.23	1.36	0.42	-0.2	0.99	1.79	1.85	1	1.37	2.1	3.46	1.21	5.7	1.77	0	-0.13	2.07	4.78	0.42	0.39	-0.12	-0.32	-0.31	-0.48	-0.03	-0.28	-0.07	0.18	-0.31	-0.36	-0.26	-0.38	-0.42	-0.4	-0.41	-0.46	0.02	-0.36	-0.36	-0.44	-0.39	-0.39	-0.32	-0.24	-0.23	-0.31	-0.39
MANNO_MIDBRAIN_NEUROTYPES_HNBM	0.14	0.74	0.26	1.18	0.35	-0.04	0.76	1.86	2.2	0.95	1.71	1	1.61	0.91	5.16	1.08	0.04	-0.16	2.09	3.86	0.56	0.36	0	-0.35	-0.3	-0.43	-0.2	-0.36	-0.08	-0.11	-0.31	-0.39	-0.38	-0.37	-0.46	-0.4	-0.47	-0.44	-0.03	-0.31	-0.38	-0.45	-0.36	-0.38	-0.37	-0.25	-0.21	-0.31	-0.37
GAO_LARGE_INTESTINE_ADULT_CA_ENTEROENDOCRINE_CELLS	-0.22	0.04	0.47	2.16	0.39	0.26	1.37	1.73	2.51	0.43	1.89	1.27	3.52	0.95	5.66	1.08	-0.06	-0.02	1.8	4.59	-0.18	0.04	0.36	-0.16	0.16	-0.47	-0.22	-0.37	-0.01	-0.36	-0.28	-0.35	-0.32	-0.36	-0.45	-0.45	-0.47	-0.41	-0.25	-0.25	-0.44	-0.37	-0.31	-0.25	-0.39	-0.25	-0.26	-0.29	-0.33
ZHONG_PFC_C3_MICROGLIA	-0.26	0.26	0.23	1.89	0.26	-0.1	1.31	1.71	2.19	0.66	1.96	1.53	2.29	0.73	5.58	0.84	-0.23	-0.17	1.04	3.1	0.2	0.03	0.42	-0.34	0.33	-0.42	0.12	-0.29	-0.21	-0.16	-0.18	-0.3	-0.27	-0.3	-0.38	-0.42	-0.41	-0.45	-0.15	-0.32	-0.41	-0.37	-0.35	-0.39	-0.33	-0.25	-0.26	-0.37	-0.36
HAY_BONE_MARROW_ERYTHROBLAST	0.1	0.17	0.85	0.77	0.74	0.19	1.21	2.72	3.05	1.6	3.03	1.13	1.88	0.35	4.9	1.11	-0.05	0.03	1.15	4.02	0.3	0.31	0.28	-0.42	-0.05	0.03	0.17	-0.23	0.43	1.04	0.01	-0.25	-0.43	-0.16	-0.18	-0.13	-0.2	-0.35	-0.15	-0.23	-0.35	-0.24	-0.28	-0.3	-0.31	-0.17	-0.22	-0.25	-0.27
ZHONG_PFC_C8_UNKNOWN_NEUROD2_POS_INTERNEURON	-0.1	0.37	0.4	1.34	0	0.3	0.84	1.78	2.74	0.51	2.61	0.51	1.52	0.2	5.28	0.27	-0.23	-0.16	0.04	4.09	-0.01	0.36	0.04	-0.3	0.11	-0.41	-0.31	-0.33	-0.23	-0.11	-0.02	-0.28	-0.4	-0.42	-0.42	-0.45	-0.39	-0.55	-0.39	-0.47	-0.36	-0.49	-0.52	-0.48	-0.53	-0.35	-0.4	-0.48	-0.53
GAUTAM_EYE_CORNEA_MELANOCYTES	-0.13	0.82	0.86	0.13	-0.01	-0.04	1.39	1.57	2.23	0.28	1.53	2.5	2.6	0.3	4.92	1.74	-0.18	-0.26	1.38	4.13	0.06	0.23	0.41	-0.04	-0.34	-0.11	0.55	-0.34	0.53	0.54	-0.1	-0.23	-0.55	-0.45	-0.28	-0.37	-0.47	-0.36	-0.3	-0.31	-0.31	-0.44	-0.37	-0.46	-0.51	-0.29	-0.36	-0.39	-0.42
LAKE_ADULT_KIDNEY_C2_PODOCYTES	-0.35	0.18	0.27	0.06	-0.07	-0.1	0.7	0.54	1	0.13	0.74	1.46	1.51	-0.14	4.06	0.51	-0.28	-0.27	0.25	2.31	0.1	0.81	0.56	-0.32	-0.26	-0.36	0.49	-0.32	-0.14	-0.09	-0.28	-0.38	-0.46	-0.42	-0.34	-0.37	-0.3	-0.38	-0.38	-0.33	-0.34	-0.47	-0.39	-0.42	-0.4	-0.32	-0.39	-0.38	-0.39
MANNO_MIDBRAIN_NEUROTYPES_HNPROG	-0.08	0.67	0.26	0.4	0.29	0.04	0.8	1.55	1.89	0.67	1.42	2.69	2.04	0.07	5.8	1.4	-0.11	-0.23	1.91	3.07	0.72	1.8	0.91	-0.28	-0.04	-0.01	1.07	-0.32	0.01	0.65	0.03	-0.35	-0.13	-0.29	-0.29	-0.32	-0.14	-0.29	-0.13	-0.29	-0.14	-0.27	-0.31	-0.38	-0.26	-0.21	-0.26	-0.34	-0.36
MANNO_MIDBRAIN_NEUROTYPES_HRN	0.13	0.22	0.79	1.66	0.79	-0.16	1.23	1.86	2	0.79	1.79	2.04	2.76	1.06	3.94	1.02	-0.21	-0.16	0.79	2.8	0.38	0.63	-0.17	-0.4	-0.4	-0.46	-0.12	-0.39	0.01	-0.2	-0.37	-0.39	-0.36	-0.31	-0.4	-0.37	-0.44	-0.44	-0.18	-0.39	-0.34	-0.44	-0.36	-0.34	-0.34	-0.25	-0.22	-0.32	-0.38
MURARO_PANCREAS_DELTA_CELL	-0.18	-0.19	-0.31	1.28	0.2	-0.1	1.28	1.41	2.32	1.4	2.63	1.24	2.42	0.69	3.51	0.45	-0.23	-0.24	0.49	3.36	0.37	-0.08	0.35	-0.32	-0.32	-0.23	0.45	-0.31	-0.25	-0.23	-0.16	-0.35	-0.34	-0.41	-0.38	-0.41	-0.41	-0.31	-0.39	-0.36	-0.35	-0.42	-0.3	-0.38	-0.4	-0.4	-0.36	-0.41	-0.41
TRAVAGLINI_LUNG_NEUROENDOCRINE_CELL	-0.19	0.48	0.88	0.42	0.23	0.24	0.79	0.53	1.54	0.39	1.56	2.04	3.75	0.88	5.51	0.31	0.22	0.16	1.04	2.36	0.03	-0.2	0.15	-0.45	-0.3	-0.47	0.06	-0.18	0.06	-0.62	-0.2	-0.3	-0.21	-0.16	-0.36	-0.45	-0.43	-0.31	-0.11	-0.33	-0.21	-0.49	-0.37	-0.35	-0.28	-0.22	-0.05	-0.2	-0.33
WP_ECTODERM_DIFFERENTIATION	0.43	1.09	1.43	0.35	0.6	-0.01	1.31	1.27	1.95	0.34	1.5	1.86	3.23	0.66	5.13	0.57	-0.16	-0.1	0.63	1.94	0.89	0.02	0.14	-0.14	-0.02	-0.13	-0.14	-0.3	-0.21	-0.21	-0.33	-0.31	-0.32	-0.32	-0.3	-0.44	-0.33	-0.44	-0.36	-0.31	-0.42	-0.4	-0.42	-0.29	-0.41	-0.32	-0.41	-0.44	-0.42
GAUTAM_EYE_IRIS_CILIARY_BODY_FIBROBLASTS	-0.14	0.5	0.49	0.94	0.12	0.19	0.37	0.56	0.66	-0.02	0.42	1.42	1.16	0.5	5.1	0.91	-0.37	-0.35	1.17	2.85	1.8	0.56	0.46	-0.18	-0.26	-0.09	-0.04	-0.38	-0.1	0.59	-0.05	-0.24	-0.53	-0.35	-0.31	-0.45	-0.38	-0.37	-0.29	-0.45	-0.45	-0.43	-0.36	-0.38	-0.45	-0.35	-0.32	-0.43	-0.43
ZHONG_PFC_MAJOR_TYPES_ASTROCYTES	-0.22	0.06	0.68	1.03	0.14	-0.06	0.62	0.53	0.54	0.16	0.57	2.1	1.86	0.41	4.05	0.99	-0.15	-0.25	1.96	2.55	0.72	0.79	1.03	0.38	-0.38	-0.35	-0.14	-0.39	-0.27	0.01	-0.24	-0.34	-0.56	-0.38	-0.44	-0.45	-0.45	-0.39	-0.38	-0.36	-0.4	-0.47	-0.46	-0.48	-0.43	-0.46	-0.39	-0.4	-0.38
HAY_BONE_MARROW_NK_CELLS	-0.27	0.27	0.4	1.85	0.33	-0.02	1.36	0.42	0.62	-0.12	0.31	1.06	1.14	0.07	3.62	0.8	-0.31	-0.32	1.63	3.53	0.53	-0.16	0.2	-0.2	-0.39	-0.42	-0.25	-0.46	-0.15	-0.3	-0.15	-0.25	-0.5	-0.39	-0.34	-0.51	-0.46	-0.33	-0.35	-0.38	-0.37	-0.38	-0.34	-0.42	-0.41	-0.4	-0.39	-0.35	-0.36
TRAVAGLINI_LUNG_CD8_NAIVE_T_CELL	-0.28	0.33	0.97	1.45	0.22	-0.2	1.31	0.45	0.46	0.26	1.32	0.9	0.68	0.08	5.18	0.62	-0.29	-0.27	1.23	3.16	0	0.63	-0.04	-0.09	-0.22	-0.27	0.19	-0.49	-0.22	0.31	-0.23	-0.28	-0.28	-0.41	-0.25	-0.44	-0.35	-0.38	-0.39	-0.42	-0.38	-0.41	-0.27	-0.38	-0.34	-0.38	-0.31	-0.32	-0.4
ZHONG_PFC_C4_UNKNOWN_INP	-0.07	-0.02	0.45	1.52	0.18	-0.17	1.9	0.51	0.35	-0.16	0.88	1.28	0.38	-0.17	3.47	0.48	-0.26	-0.32	1.03	1.91	-0.21	-0.02	0.12	-0.31	-0.3	-0.34	-0.23	-0.41	-0.31	0.11	-0.26	-0.33	-0.41	-0.29	-0.34	-0.37	-0.37	-0.39	-0.29	-0.39	-0.39	-0.43	-0.37	-0.42	-0.38	-0.32	-0.36	-0.39	-0.4
DESCARTES_FETAL_KIDNEY_STROMAL_CELLS	1.2	0.95	2.63	0.44	-0.34	-0.47	0.68	1.37	0.17	0.63	0.1	1.01	0.94	0.18	4.84	1.03	-0.23	-0.33	1.63	4.09	-0.26	-0.45	1.46	-0.34	-0.29	-0.53	0.03	-0.38	-0.26	-0.27	-0.37	-0.35	-0.3	-0.51	-0.55	-0.48	-0.41	-0.46	-0.42	-0.35	-0.41	-0.48	-0.44	-0.42	-0.46	-0.41	-0.41	-0.48	-0.46
RUBENSTEIN_SKELETAL_MUSCLE_NK_CELLS	0.22	0.3	2.24	1.24	0.04	0.05	1.59	0.55	0.87	-0.1	0.51	0.99	0.69	0.58	4.07	1.19	-0.18	-0.13	2.54	4.96	0.08	-0.05	1.17	-0.09	-0.33	-0.27	-0.14	-0.34	0.2	-0.05	-0.12	-0.32	-0.53	-0.5	-0.32	-0.44	-0.41	-0.37	-0.27	-0.38	-0.43	-0.39	-0.35	-0.38	-0.35	-0.35	-0.33	-0.34	-0.35
TRAVAGLINI_LUNG_NATURAL_KILLER_CELL	0.34	0.71	1.58	0.54	-0.23	-0.21	2.11	0.36	0.09	-0.09	0.98	1.44	1.17	0.08	4.68	1.42	-0.39	-0.38	0.96	4.88	-0.09	0.02	0.45	-0.23	-0.56	-0.44	-0.07	-0.45	-0.09	-0.38	-0.32	-0.32	-0.7	-0.54	-0.45	-0.58	-0.47	-0.45	-0.47	-0.44	-0.39	-0.46	-0.32	-0.57	-0.52	-0.57	-0.35	-0.33	-0.46
TRAVAGLINI_LUNG_GOBLET_CELL	1.6	0.77	2.04	0.26	-0.25	-0.25	1.08	0.21	0.28	-0.04	0.39	1.35	1.26	0.75	3.88	1.94	-0.21	-0.24	2.68	5.22	-0.04	0.03	0.19	-0.02	0.11	-0.2	-0.12	-0.33	-0.3	-0.23	-0.35	-0.31	-0.32	-0.38	-0.32	-0.32	-0.39	-0.37	-0.41	-0.4	-0.37	-0.43	-0.39	-0.41	-0.45	-0.41	-0.39	-0.41	-0.39
CUI_DEVELOPING_HEART_5TH_WEEK_VENTRICULAR_CARDIOMYOCYTE	-0.35	-0.13	-0.05	0.6	-0.04	0.16	0	-0.1	0.3	-0.15	0.04	0.1	0.4	-0.12	3.96	1.55	-0.3	-0.35	0.46	3.59	0.77	-0.21	0.32	-0.33	-0.34	-0.19	0.49	-0.39	-0.4	-0.18	-0.23	-0.28	-0.26	-0.37	-0.3	-0.36	-0.35	-0.36	-0.36	-0.3	-0.39	-0.4	-0.36	-0.35	-0.36	-0.25	-0.4	-0.38	-0.38
TRAVAGLINI_LUNG_DIFFERENTIATING_BASAL_CELL	-0.32	0.15	0.73	1.08	-0.15	-0.06	0.83	1.52	1.26	0.17	0.84	0.35	1.13	0.28	4.86	2.13	-0.26	-0.26	2.23	5.77	0.41	0.39	0.05	-0.33	0.14	-0.38	0.62	-0.42	-0.39	-0.5	-0.3	-0.4	-0.33	-0.4	-0.38	-0.37	-0.44	-0.42	-0.4	-0.41	-0.45	-0.44	-0.45	-0.43	-0.53	-0.45	-0.48	-0.49	-0.47
TRAVAGLINI_LUNG_MUCOUS_CELL	-0.24	0.16	0.49	0.92	0.02	-0.19	0.8	0.6	0.39	0.06	2.07	1.39	0.92	1.02	5.29	3.03	-0.27	-0.25	1.35	6.5	0.04	0.07	0.07	0.16	0.24	-0.46	0.27	-0.46	-0.01	-0.04	-0.14	-0.34	-0.36	-0.52	-0.38	-0.47	-0.43	-0.23	-0.45	-0.35	-0.4	-0.49	-0.34	-0.47	-0.34	-0.61	-0.34	-0.39	-0.4
TRAVAGLINI_LUNG_IGSF21_DENDRITIC_CELL	-0.28	0.1	0.54	0.35	-0.37	-0.4	1.01	0.5	0.51	-0.07	0.05	0.07	0.14	0.16	3.92	0.36	-0.17	-0.26	1.5	3.75	-0.28	-0.24	0.17	-0.24	-0.3	-0.44	-0.49	-0.38	-0.26	0.25	-0.26	-0.36	-0.33	-0.49	-0.42	-0.42	-0.37	-0.4	-0.46	-0.4	-0.37	-0.45	-0.39	-0.41	-0.41	-0.41	-0.36	-0.41	-0.44
VANGURP_PANCREATIC_ALPHA_CELL	-0.16	0.11	0.26	0.19	-0.17	-0.21	0.23	0.11	0.23	0.1	0.72	0.19	0.4	0.09	3.82	0.55	-0.32	-0.27	1.83	4.89	-0.06	-0.41	0.6	-0.28	-0.28	-0.22	-0.37	-0.31	-0.01	0.14	0.12	-0.36	-0.41	-0.31	-0.26	-0.35	-0.28	-0.33	-0.35	-0.38	-0.43	-0.38	-0.38	-0.29	-0.39	-0.36	-0.36	-0.41	-0.42
BUSSLINGER_ESOPHAGEAL_EARLY_SUPRABASAL_CELLS	-0.16	0.28	0.26	0.65	0.22	0.02	1.1	0.55	0.82	0.01	0.66	0.43	0.86	0.31	2.72	1.09	-0.11	-0.16	-0.07	1.22	0.46	0.74	1.23	-0.34	0.33	0.05	0.22	-0.28	0.2	0.85	0.11	-0.21	-0.19	-0.17	-0.13	-0.19	-0.11	-0.31	-0.03	-0.2	-0.23	-0.18	-0.13	-0.17	-0.2	-0.13	-0.13	-0.22	-0.28
GAO_LARGE_INTESTINE_ADULT_CH_MKI67HIGH_CELLS	-0.23	0.07	0.11	0.64	-0.07	0.01	0.64	0.42	0.88	0.23	0.74	0.45	1.17	0.15	1.82	0.68	-0.23	-0.11	0.05	1.09	-0.11	0.33	1.15	-0.27	0.16	0.16	-0.03	-0.29	-0.14	0.11	0.11	-0.23	0.36	-0.25	-0.19	0.08	-0.07	-0.33	-0.08	-0.26	-0.11	-0.05	-0.12	-0.27	-0.26	-0.12	-0.12	-0.21	-0.21
FAN_EMBRYONIC_CTX_BRAIN_B_CELL	0.19	-0.26	0.03	0.57	-0.06	0.69	-0.15	1.64	2.32	0.05	1.82	0.56	0.49	0.27	5.41	1.38	-0.28	-0.27	0.46	1.53	0.25	1.91	1.39	-0.03	-0.25	-0.27	-0.22	-0.21	0.23	0.48	-0.29	-0.26	-0.48	-0.44	-0.41	-0.38	-0.47	-0.46	-0.45	-0.34	-0.27	-0.54	-0.37	-0.52	-0.37	-0.32	-0.36	-0.42	-0.31
FAN_EMBRYONIC_CTX_NSC_2	-0.23	-0.12	0.49	0.64	0.15	-0.01	0.38	1.09	1.94	0.09	0.88	0.52	1.15	0.62	4.5	1.34	-0.18	-0.1	0.61	2.76	-0.12	1.87	1.77	-0.19	0.07	-0.25	0.12	-0.21	-0.16	-0.07	0.11	-0.3	-0.13	-0.29	-0.24	-0.14	-0.25	-0.28	-0.12	-0.37	-0.37	-0.35	-0.27	-0.31	-0.28	-0.19	-0.29	-0.27	-0.29
ZHONG_PFC_C1_OPC	-0.08	-0.18	0.63	0.76	0.11	-0.03	0.43	2.06	2.95	0.16	0.85	0.73	1.27	0.73	4.02	1.09	-0.06	-0.18	1.84	2.31	0.52	1.67	2.85	-0.17	0.26	0.06	1.23	0.17	-0.05	0.15	0.05	-0.34	-0.21	-0.28	-0.27	-0.2	-0.33	-0.37	-0.25	-0.42	-0.43	-0.32	-0.32	-0.4	-0.32	-0.26	-0.33	-0.26	-0.36
ZHONG_PFC_MAJOR_TYPES_NPCS	0.07	0.12	0.84	2.11	0.66	0.09	0.83	1.43	2.19	0.22	1.41	0.77	1.17	0.55	4.96	0.7	-0.17	-0.24	1.16	1.88	0.15	0.93	0.95	-0.35	0.08	-0.19	0.2	-0.18	-0.2	0.07	-0.1	-0.31	-0.06	-0.23	-0.35	-0.33	-0.32	-0.32	-0.19	-0.36	-0.41	-0.4	-0.4	-0.39	-0.37	-0.25	-0.32	-0.33	-0.34
DESCARTES_MAIN_FETAL_MUC13_DMBT1_POSITIVE_CELLS	0.02	-0.26	-0.16	-0.35	-0.27	0.06	0.55	-0.19	-0.17	-0.18	0.26	0.17	1.19	0.11	0.36	0.5	0.24	0.28	1.78	6.26	-0.39	0.34	-0.02	0.02	-0.22	-0.21	-0.32	-0.1	-0.22	0.28	0.06	-0.27	0.16	-0.29	-0.1	-0.13	-0.2	-0.06	0.07	-0.01	-0.25	0.04	-0.16	-0.25	-0.18	-0.08	-0.1	-0.08	-0.16
GAO_ESOPHAGUS_25W_C2_KRT6BPOS_SECRETORY_PROGENITOR_CELLS	-0.2	-0.03	-0.18	-0.24	-0.34	-0.31	0.25	-0.11	-0.08	-0.2	0.31	1.38	0.62	-0.31	0.69	1.19	-0.08	-0.14	1.56	5.05	0.05	0.42	0.86	-0.16	-0.32	-0.31	0.06	-0.32	-0.41	0.69	-0.01	-0.27	-0.17	-0.37	-0.26	-0.31	-0.37	-0.33	-0.35	-0.32	-0.32	-0.39	-0.23	-0.35	-0.37	-0.33	-0.38	-0.31	-0.34
GAO_SMALL_INTESTINE_24W_C6_GOBLET_CELLS	-0.22	-0.38	-0.12	-0.4	-0.37	-0.32	0.32	-0.29	-0.23	-0.19	0.07	0.65	0.28	-0.07	1.09	0.02	-0.18	-0.33	3.67	5.75	-0.1	-0.22	1.27	-0.25	-0.15	-0.11	0.83	-0.36	-0.39	0.07	0.07	-0.36	-0.49	-0.27	-0.33	-0.33	-0.37	-0.34	-0.36	-0.3	-0.43	-0.28	-0.28	-0.35	-0.23	-0.2	-0.21	-0.24	-0.42
DESCARTES_FETAL_STOMACH_ENS_GLIA	-0.06	0.16	0.08	-0.44	-0.46	-0.48	-0.07	0.6	0.56	0.11	2.2	0.08	0.31	-0.23	3.03	0.31	-0.42	-0.56	0.37	6.49	-0.24	-0.22	0.4	-0.39	-0.21	-0.39	-0.31	-0.46	-0.26	0.08	-0.4	-0.33	-0.32	-0.39	-0.47	-0.26	-0.28	-0.26	-0.26	-0.38	-0.4	-0.28	-0.36	-0.41	-0.28	-0.33	-0.36	-0.35	-0.37
DESCARTES_MAIN_FETAL_LENS_FIBRE_CELLS	-0.23	-0.06	-0.01	0	-0.3	-0.25	0.59	0.23	0	-0.16	0.32	0.14	0.53	-0.07	2.61	0.08	-0.18	-0.16	0.21	4.1	0.07	-0.01	0.15	-0.27	-0.05	0	-0.09	-0.12	-0.2	-0.62	-0.27	-0.27	-0.29	-0.28	-0.33	-0.28	-0.31	-0.28	-0.21	-0.22	-0.32	-0.22	-0.28	-0.33	-0.4	-0.31	-0.25	-0.32	-0.33
HAY_BONE_MARROW_EARLY_ERYTHROBLAST	0.06	-0.02	0.16	-0.05	0.08	-0.07	0.48	0.15	0.1	-0.12	0.29	0.2	0.24	0.29	1.48	0.28	-0.25	-0.17	0.18	3.78	0.09	0.07	0.57	-0.22	-0.06	-0.1	1.65	-0.28	-0.04	0.19	-0.23	-0.26	-0.31	-0.23	-0.19	-0.22	-0.28	-0.22	-0.26	-0.25	-0.26	-0.28	-0.29	-0.3	-0.33	-0.23	-0.21	-0.24	-0.31
HAY_BONE_MARROW_PLASMA_CELL	1.88	0.17	0.36	-0.15	-0.2	-0.24	0.65	0.72	0.93	-0.19	0.9	0.7	0.56	-0.25	2.31	0.72	-0.23	-0.33	0.16	3.17	0.1	-0.22	0.05	-0.38	-0.27	-0.23	-0.04	-0.23	-0.09	0.19	-0.32	-0.31	-0.38	-0.36	-0.36	-0.33	-0.34	-0.34	-0.38	-0.35	-0.4	-0.36	-0.33	-0.32	-0.36	-0.38	-0.36	-0.39	-0.37
DESCARTES_FETAL_PLACENTA_TROPHOBLAST_GIANT_CELLS	0.03	-0.37	-0.13	0.07	0.32	0.07	0.26	0.44	0.13	-0.09	0.65	0.36	1.86	0.61	1.79	1.8	-0.22	-0.24	0.16	3.02	0.58	0.86	0.44	-0.2	-0.15	0.03	-0.15	-0.06	-0.18	-0.08	0.6	-0.25	-0.56	-0.28	-0.09	-0.11	-0.25	-0.31	-0.35	-0.34	-0.3	-0.33	-0.19	-0.34	-0.32	-0.29	-0.21	-0.28	-0.35
HAY_BONE_MARROW_CD8_T_CELL	-0.22	0.29	0.09	0.11	-0.05	-0.06	0.79	1.27	1.13	-0.07	0.53	0.74	1.98	0.14	1.82	2.44	-0.04	-0.21	1.74	4.17	-0.21	-0.11	0.29	0.33	1.47	-0.28	-0.13	-0.31	-0.08	-0.62	-0.28	-0.28	-0.64	-0.58	-0.23	-0.38	-0.39	-0.33	-0.5	-0.37	-0.38	-0.42	-0.4	-0.43	-0.48	-0.43	-0.35	-0.43	-0.47
TRAVAGLINI_LUNG_CD4_MEMORY_EFFECTOR_T_CELL	-0.34	-0.11	-0.04	0.14	0.35	0.31	1.75	1.09	0.76	0.01	0.67	0.64	0.8	0.41	1.83	1.28	-0.13	-0.28	1.81	4.79	-0.16	0.12	1.37	-0.03	1.76	0.36	-0.06	-0.5	-0.1	-0.32	0.19	-0.24	-0.37	-0.41	-0.47	-0.49	-0.33	-0.19	-0.09	-0.41	-0.32	-0.28	-0.28	-0.44	-0.39	-0.56	-0.31	-0.34	-0.39
DESCARTES_FETAL_PLACENTA_STROMAL_CELLS	-0.03	-0.12	-0.07	-0.1	-0.54	-0.08	0.72	1.76	1.12	0.65	1.14	0.54	0.81	0.1	1.95	1.64	-0.27	-0.55	-0.06	3.33	0.35	0.79	0.78	-0.25	-0.03	-0.04	0.13	-0.45	-0.39	-0.57	-0.5	-0.33	-0.41	-0.37	-0.34	-0.27	-0.17	-0.4	-0.42	-0.32	-0.32	-0.26	-0.26	-0.33	-0.35	-0.32	-0.27	-0.39	-0.39
GAO_STOMACH_24W_C5_PUTATIVE_PIT_CELL_PROGENITOR	-0.2	-0.24	0.73	-0.02	0.05	-0.06	1.19	1.35	0.8	0.65	0.58	0.35	0.67	0.02	1.94	0.9	-0.19	-0.32	0.11	4.3	-0.17	0.35	0.66	0.06	-0.18	-0.14	-0.07	-0.22	-0.17	0.98	-0.09	-0.28	-0.1	-0.28	-0.12	-0.26	-0.39	-0.34	-0.37	-0.3	-0.36	-0.25	-0.27	-0.29	-0.22	-0.25	-0.24	-0.33	-0.3
FAN_OVARY_CL0_XBP1_SELK_HIGH_STROMAL_CELL	0.61	0.1	0.26	0.49	0.03	-0.26	1.66	0.71	0.62	-0.04	1.09	1.2	0.85	0.43	1.69	0.47	-0.33	-0.23	0.02	2.54	-0.09	0.19	0.92	-0.34	-0.31	-0.25	-0.08	-0.45	0.08	-0.12	-0.44	-0.32	-0.46	-0.58	-0.35	-0.44	-0.46	-0.44	-0.37	-0.38	-0.46	-0.35	-0.43	-0.41	-0.51	-0.44	-0.38	-0.5	-0.55
GAUTAM_EYE_CHOROID_SCLERA_CHOROID_ENDOTHELIAL_CELLS	-0.1	0.19	0.27	0.43	-0.08	-0.07	0.63	1.1	2	0.34	2.38	0.37	1.2	0.34	1.98	0.94	-0.19	-0.14	0.75	4.35	0.1	-0.01	0.35	-0.26	-0.22	-0.29	-0.01	-0.27	0.28	0.09	-0.25	-0.27	-0.53	-0.48	-0.19	-0.18	-0.33	-0.4	-0.32	-0.28	-0.31	-0.35	-0.35	-0.34	-0.35	-0.31	-0.33	-0.34	-0.39
LAKE_ADULT_KIDNEY_C23_ENDOTHELIAL_CELLS_AVR	0.02	-0.04	0.33	0.27	0.05	-0.27	1.86	0.97	1.94	0.32	1.52	0.66	1.09	0.66	1.41	0.32	-0.17	-0.2	1.45	3.49	0.58	-0.16	0.09	-0.14	-0.4	-0.26	-0.22	-0.39	0.3	-0.48	-0.04	-0.32	-0.62	-0.47	-0.38	-0.55	-0.43	-0.38	-0.43	-0.38	-0.44	-0.35	-0.3	-0.31	-0.42	-0.51	-0.32	-0.4	-0.42
TRAVAGLINI_LUNG_BRONCHIAL_VESSEL_1_CELL	-0.06	-0.02	-0.07	2.64	0.72	-0.03	2.03	1.66	2.36	1.67	2.12	1.63	1.57	0.45	3.16	1.62	-0.31	-0.17	1.23	4.72	0.37	-0.09	0.61	0.54	-0.28	-0.08	0.19	-0.37	0.17	-0.41	-0.03	-0.26	-0.23	-0.56	-0.51	-0.38	-0.52	-0.42	-0.35	-0.21	-0.35	-0.35	-0.42	-0.36	-0.43	-0.45	-0.28	-0.31	-0.41
ZHONG_PFC_C7_ORG_UNDERGOING_NEURONAL_DIFFERENTIATION	-0.25	0.1	-0.13	-0.05	-0.26	-0.07	2.01	0.89	0.69	0.03	2.19	0.77	0.43	-0.15	0.79	0.27	-0.24	-0.21	0.22	2.57	0.08	0.1	0.93	-0.04	-0.08	-0.12	-0.2	-0.11	-0.3	-0.09	-0.22	-0.31	-0.27	-0.35	-0.32	-0.29	-0.23	-0.41	-0.3	-0.4	-0.26	-0.33	-0.36	-0.31	-0.34	-0.32	-0.33	-0.28	-0.33
TRAVAGLINI_LUNG_VEIN_CELL	-0.14	0.4	0.62	0.78	-0.17	0.3	-0.07	1.24	2.34	3.06	1.95	0.08	1.76	0.22	0.33	0.32	-0.22	-0.38	1.58	4.76	-0.01	-0.11	1.12	-0.19	0.12	0.11	-0.11	-0.18	0.43	0.17	-0.2	-0.35	-0.28	-0.44	-0.33	-0.25	-0.35	-0.2	0.03	-0.32	-0.16	-0.29	-0.32	-0.34	-0.3	-0.43	-0.32	-0.38	-0.39
DURANTE_ADULT_OLFACTORY_NEUROEPITHELIUM_UNSPECIFIED	0.16	0.5	0.21	-0.16	-0.21	-0.2	2.3	0.59	0.23	-0.07	0.13	0.49	0.69	0.07	1.55	1.36	-0.24	-0.27	-0.06	0.74	0.89	0.43	1.4	-0.32	-0.03	-0.06	2.2	0.29	0.39	0.32	-0.36	-0.3	-0.36	-0.44	-0.37	-0.41	-0.44	-0.47	-0.42	-0.26	-0.31	-0.47	-0.36	-0.42	-0.43	-0.33	-0.39	-0.35	-0.42
TRAVAGLINI_LUNG_FIBROMYOCYTE_CELL	-0.25	-0.18	0.82	-0.35	-0.28	-0.32	-0.06	-0.07	0.44	-0.11	0.86	1.65	0.31	0	1.51	0.03	-0.22	-0.28	1.17	2.04	1.03	0.06	3.51	-0.41	0.08	0.13	3.03	0.9	0.3	0.09	-0.23	-0.36	-0.56	-0.49	-0.26	-0.38	-0.37	-0.42	-0.41	-0.4	-0.23	-0.39	-0.29	-0.29	-0.32	-0.29	-0.35	-0.38	-0.42
DURANTE_ADULT_OLFACTORY_NEUROEPITHELIUM_MONOCYTES	-0.07	1.05	1.69	-0.01	-0.15	-0.08	-0.08	-0.02	0.08	-0.02	0.33	-0.21	-0.02	0.61	0.48	0.83	-0.15	-0.21	-0.1	0.46	0.09	-0.07	0.39	-0.19	-0.19	-0.2	0.47	-0.3	-0.08	1.71	-0.26	-0.27	-0.42	-0.3	-0.19	-0.37	-0.37	-0.33	-0.34	-0.34	-0.35	-0.32	-0.32	-0.42	-0.3	-0.35	-0.37	-0.35	-0.4
DESCARTES_FETAL_LIVER_VASCULAR_ENDOTHELIAL_CELLS	-0.31	2.54	2.63	0.41	0.6	0.51	0.12	-0.07	-0.12	-0.11	0.6	2.22	0.97	-0.24	1.95	0.54	-0.2	-0.27	0.41	2.04	1.33	-0.22	-0.05	-0.29	-0.22	-0.33	-0.27	-0.36	-0.36	-0.25	-0.39	-0.38	-0.26	-0.36	-0.31	-0.32	-0.31	-0.34	-0.34	-0.34	-0.35	-0.39	-0.38	-0.35	-0.37	-0.29	-0.36	-0.4	-0.38
DESCARTES_MAIN_FETAL_GOBLET_CELLS	-0.21	1.52	2.24	-0.07	-0.23	-0.24	0.23	-0.22	-0.1	-0.16	-0.04	1.95	0.69	-0.05	1.32	0.14	-0.27	-0.28	-0.25	1.66	0.06	-0.12	-0.21	-0.2	-0.24	-0.38	-0.45	-0.32	-0.05	0.32	-0.06	-0.27	0.06	-0.36	-0.27	-0.36	-0.34	-0.18	-0.24	-0.23	-0.14	-0.25	-0.28	-0.31	-0.37	-0.27	-0.26	-0.22	-0.22
CUI_DEVELOPING_HEART_CORONARY_VASCULAR_ENDOTHELIAL_CELL	-0.29	2.45	3.89	-0.06	-0.09	-0.08	-0.02	0.68	1.61	0.16	1.58	0.25	0.75	-0.01	0.05	-0.08	-0.24	-0.24	0.58	0.36	-0.32	-0.17	0.48	-0.42	0.05	-0.24	-0.26	-0.25	-0.27	-0.14	-0.2	-0.35	-0.36	-0.44	-0.33	-0.43	-0.38	-0.37	-0.39	-0.42	-0.33	-0.34	-0.39	-0.41	-0.44	-0.41	-0.31	-0.4	-0.4
DESCARTES_FETAL_KIDNEY_VASCULAR_ENDOTHELIAL_CELLS	-0.31	3.15	3.8	0.46	0.83	0.75	0.51	0.94	1.69	-0.16	1.1	0.03	0.13	-0.12	1.35	0.1	0.17	-0.03	2.95	0.03	0.09	0.13	-0.06	-0.26	-0.29	-0.38	-0.19	-0.4	-0.44	0.27	-0.44	-0.36	-0.3	-0.31	-0.23	-0.36	-0.41	-0.39	-0.43	-0.34	-0.39	-0.41	-0.39	-0.37	-0.35	-0.37	-0.39	-0.39	-0.45
DESCARTES_FETAL_INTESTINE_VASCULAR_ENDOTHELIAL_CELLS	-0.36	3.29	3.38	0.2	0.51	-0.02	0.75	0.11	0.85	-0.29	0.42	0.11	0.7	-0.06	0.64	-0.15	-0.46	-0.43	-0.18	0.53	0.24	-0.01	0.48	-0.3	-0.09	-0.14	-0.4	-0.33	-0.44	0.19	-0.21	-0.33	-0.49	-0.4	-0.26	-0.36	-0.29	-0.28	-0.39	-0.26	-0.35	-0.3	-0.39	-0.39	-0.4	-0.39	-0.34	-0.38	-0.4
DESCARTES_FETAL_MUSCLE_VASCULAR_ENDOTHELIAL_CELLS	-0.23	3.34	3.5	0.33	0.18	0.02	0.43	-0.05	0.11	-0.33	0.65	0.64	0.78	-0.09	1.33	0.1	-0.27	-0.34	0.02	0.09	0.42	0.3	-0.11	-0.32	-0.2	-0.37	-0.01	-0.44	-0.51	-0.1	-0.28	-0.35	-0.46	-0.47	-0.25	-0.33	-0.34	-0.27	-0.46	-0.3	-0.25	-0.28	-0.39	-0.38	-0.43	-0.33	-0.37	-0.38	-0.44
DESCARTES_FETAL_PANCREAS_VASCULAR_ENDOTHELIAL_CELLS	-0.24	3.27	3.48	0.76	1.05	0.62	0.2	-0.02	0.24	-0.2	0.53	0.1	0.06	-0.05	2.62	-0.02	-0.14	-0.23	1.06	0.13	-0.09	0.54	-0.1	-0.38	0.18	-0.16	-0.04	-0.31	-0.32	0.01	-0.19	-0.34	-0.32	-0.33	-0.25	-0.32	-0.37	-0.32	-0.33	-0.28	-0.18	-0.23	-0.39	-0.36	-0.42	-0.36	-0.37	-0.33	-0.39
DESCARTES_FETAL_ADRENAL_VASCULAR_ENDOTHELIAL_CELLS	-0.33	2.98	3.26	2.96	0.83	0.64	0.57	0.58	0.98	0.12	0.44	2.56	1.45	0.01	2.44	0.52	-0.32	-0.38	0.2	1.47	0.34	-0.27	-0.03	-0.25	-0.39	-0.33	-0.31	-0.41	-0.45	0.25	-0.33	-0.34	-0.41	-0.4	-0.34	-0.33	-0.38	-0.37	-0.31	-0.29	-0.39	-0.41	-0.39	-0.35	-0.39	-0.33	-0.38	-0.39	-0.41
WP_ENDODERM_DIFFERENTIATION	-0.4	2.43	2.46	1.7	0.58	-0.08	1.03	0.5	0.49	0.09	0.3	0.91	1.14	0.5	1.29	0.33	-0.37	-0.42	-0.02	1.22	0.14	-0.16	0.48	-0.35	-0.35	-0.34	0.06	-0.4	-0.27	-0.24	-0.15	-0.36	-0.42	-0.33	-0.34	-0.42	-0.39	-0.42	-0.28	-0.38	-0.34	-0.33	-0.36	-0.39	-0.45	-0.36	-0.4	-0.42	-0.42
GOBP_ENDODERMAL_CELL_DIFFERENTIATION	-0.29	3.01	3.64	1.3	0.08	-0.23	-0.15	0.12	0.86	-0.17	-0.06	0.43	0.49	0.19	0.7	0.1	-0.33	-0.31	0.23	1.14	-0.15	-0.23	0.05	-0.22	-0.22	-0.33	-0.18	-0.38	-0.35	-0.24	-0.26	-0.35	-0.37	-0.32	-0.34	-0.35	-0.38	-0.34	-0.36	-0.33	-0.44	-0.38	-0.37	-0.36	-0.42	-0.35	-0.37	-0.38	-0.4
GOBP_ENDODERM_DEVELOPMENT	-0.28	2.58	3.55	1.56	0.7	-0.22	0.08	0.06	0.68	-0.17	0.02	0.61	1.13	0.2	0.83	0.21	-0.3	-0.29	0.67	1.75	0.51	-0.08	0.03	-0.14	-0.2	-0.33	-0.16	-0.33	-0.35	-0.29	-0.25	-0.34	-0.38	-0.32	-0.35	-0.36	-0.36	-0.35	-0.4	-0.32	-0.42	-0.38	-0.36	-0.34	-0.38	-0.35	-0.39	-0.38	-0.4
GOBP_ENDODERM_FORMATION	-0.32	2.66	3.45	1.53	0.57	-0.24	-0.02	0.14	0.78	-0.16	-0.06	0.6	1.07	0.22	0.63	0.19	-0.3	-0.3	0.74	1.93	0.02	-0.19	-0.04	-0.19	-0.26	-0.35	-0.12	-0.34	-0.36	-0.26	-0.27	-0.35	-0.4	-0.32	-0.3	-0.35	-0.36	-0.35	-0.37	-0.32	-0.39	-0.39	-0.38	-0.36	-0.41	-0.36	-0.37	-0.38	-0.4
DESCARTES_MAIN_FETAL_STELLATE_CELLS	-0.27	1.45	2.7	0.05	-0.02	-0.17	-0.15	0.39	0.84	0.11	0.6	-0.18	-0.16	-0.22	1.28	0	-0.39	-0.38	-0.17	1.12	-0.23	-0.35	-0.17	-0.34	-0.41	-0.27	-0.25	-0.4	-0.32	-0.25	-0.28	-0.35	-0.54	-0.45	-0.43	-0.4	-0.24	-0.38	-0.41	-0.39	-0.36	-0.37	-0.37	-0.41	-0.4	-0.39	-0.39	-0.41	-0.39
TRAVAGLINI_LUNG_PERICYTE_CELL	-0.39	2.16	3.33	0.36	0.38	-0.09	0.54	0.46	0.68	-0.11	0.32	0.08	0.04	0.03	1.19	-0.04	-0.35	-0.45	0.11	1.81	-0.02	-0.13	0.26	0.21	-0.28	-0.43	-0.35	-0.46	-0.35	0.19	-0.23	-0.41	-0.51	-0.38	-0.41	-0.51	-0.5	-0.41	-0.44	-0.46	-0.37	-0.5	-0.49	-0.54	-0.47	-0.51	-0.48	-0.48	-0.49
ZHONG_PFC_MAJOR_TYPES_OPC	0.35	1.32	2.98	0.02	0.16	-0.26	-0.16	1.23	0.91	0.27	0.07	-0.14	0.12	-0.17	2.41	-0.04	-0.37	-0.46	0.79	1.06	-0.11	-0.25	0.08	-0.32	-0.15	-0.34	-0.26	-0.36	-0.27	-0.44	-0.27	-0.37	-0.41	-0.35	-0.42	-0.32	-0.42	-0.4	-0.4	-0.38	-0.33	-0.47	-0.44	-0.42	-0.38	-0.41	-0.37	-0.43	-0.43
TRAVAGLINI_LUNG_ARTERY_CELL	-0.14	2.38	3.53	0.3	-0.1	-0.35	0.96	0.35	0.41	0.03	0.09	0.89	0.66	0.13	2.29	0.54	-0.38	-0.41	0.45	1.02	0.42	-0.21	1.3	-0.19	0.02	-0.2	1.52	0.18	0.2	0.07	-0.21	-0.32	-0.31	-0.3	-0.33	-0.32	-0.35	-0.28	-0.17	-0.32	-0.34	-0.4	-0.22	-0.34	-0.33	-0.4	-0.21	-0.22	-0.37
GAO_LARGE_INTESTINE_24W_C6_SECRETORY_PROGENITOR	-0.19	-0.25	0.16	-0.03	-0.12	-0.14	0.13	0.12	0.25	-0.01	0.02	0.07	-0.04	-0.18	0.53	-0.19	-0.22	-0.33	-0.02	0.34	0.12	0.05	-0.13	1.52	-0.3	-0.24	-0.07	-0.38	-0.14	2.05	-0.18	-0.27	-0.42	-0.03	-0.21	-0.37	-0.37	-0.28	-0.31	-0.36	-0.15	-0.42	-0.43	-0.34	-0.38	-0.39	-0.42	-0.41	-0.38
ZHONG_PFC_C1_ASTROCYTE	-0.31	-0.28	0.09	0.16	-0.18	-0.24	0.13	0.16	0.09	-0.11	0.05	0.38	0.87	0.14	1	0.19	-0.27	-0.28	-0.04	0.76	0.09	-0.17	0.53	1.04	-0.36	-0.38	-0.31	-0.31	-0.3	1.29	-0.18	-0.31	-0.52	-0.14	-0.26	-0.39	-0.43	-0.35	-0.25	-0.36	-0.29	-0.46	-0.43	-0.45	-0.35	-0.46	-0.42	-0.4	-0.42
DESCARTES_FETAL_LUNG_BRONCHIOLAR_AND_ALVEOLAR_EPITHELIAL_CELLS	-0.28	0.64	0.05	0.02	-0.12	-0.29	-0.32	-0.28	-0.05	-0.21	-0.16	2.66	1.5	-0.28	0.68	0.28	-0.23	-0.29	0.35	0.47	0.32	0.34	0.08	-0.14	-0.25	-0.16	0.41	-0.32	-0.4	0.65	-0.37	-0.27	-0.34	-0.25	-0.2	-0.26	-0.25	-0.32	-0.25	-0.25	-0.3	-0.3	-0.28	-0.36	-0.18	-0.28	-0.26	-0.3	-0.31
DESCARTES_FETAL_SPLEEN_VASCULAR_ENDOTHELIAL_CELLS	-0.32	0.02	-0.08	0.04	-0.05	-0.12	1.23	0.29	0.59	-0.27	0.43	5.09	1.39	-0.13	0	-0.05	-0.45	-0.45	-0.37	0.38	-0.29	-0.39	-0.12	-0.38	-0.24	-0.25	-0.06	-0.45	-0.39	-0.15	-0.57	-0.34	-0.1	-0.3	-0.28	-0.31	-0.37	-0.3	-0.43	-0.29	-0.29	-0.41	-0.34	-0.34	-0.38	-0.39	-0.28	-0.32	-0.37
GAO_LARGE_INTESTINE_ADULT_CF_GOBLET_CELL_SUBTYPE_1	-0.21	-0.45	-0.4	-0.46	0	0.1	-0.49	0.09	0.27	-0.1	0.6	1.91	0.56	-0.12	0.35	0.22	-0.46	-0.48	-0.1	0.51	0.39	-0.29	0.33	-0.49	-0.46	-0.46	-0.23	-0.47	-0.5	0.28	0.15	-0.5	-0.47	-0.47	-0.46	-0.46	-0.47	-0.44	-0.48	-0.42	0.07	-0.47	-0.45	-0.47	-0.47	-0.43	-0.46	-0.45	-0.47
GAO_STOMACH_24W_C1_PROCRPOS_MULTIPOTENT_PROGENITOR	-0.11	-0.26	0.08	-0.06	-0.02	0.06	0.13	-0.01	0.05	-0.17	0.28	0.87	0.49	-0.14	0.24	0.25	-0.17	-0.13	-0.02	0.1	0.08	0.07	0.06	-0.07	-0.24	-0.07	-0.01	-0.17	-0.13	-0.82	0	-0.22	-0.23	-0.12	0.05	-0.12	-0.35	-0.26	-0.19	-0.29	-0.27	-0.17	-0.12	-0.23	-0.38	-0.26	-0.2	-0.31	-0.39
GOBP_PHARYNGEAL_SYSTEM_DEVELOPMENT	-0.12	-0.25	-0.28	0.68	0.7	-0.15	0.15	0.39	0.3	0.28	0.62	0.94	2.27	-0.16	1.61	0.14	-0.24	-0.3	-0.32	0.38	1.81	1.03	0.04	0.03	-0.1	-0.33	0.81	-0.19	-0.16	-0.5	-0.09	-0.26	-0.44	-0.37	-0.16	-0.2	-0.13	-0.31	-0.08	-0.14	-0.27	-0.28	-0.19	-0.32	-0.33	-0.22	-0.35	-0.41	-0.41
FAN_EMBRYONIC_CTX_MICROGLIA_3	-0.13	0.53	0.35	1.21	-0.37	-0.23	-0.39	-0.37	-0.27	-0.3	0.03	2.56	4.63	-0.01	1.85	0.04	-0.35	-0.37	-0.34	0.81	0.11	-0.43	1.29	0.05	0.11	-0.25	-0.31	-0.4	0.17	-0.09	-0.19	-0.34	-0.02	-0.47	-0.42	-0.24	-0.45	-0.48	-0.23	-0.37	-0.45	-0.48	-0.29	-0.38	-0.31	-0.38	-0.45	-0.4	-0.34
GOBP_ECTODERM_DEVELOPMENT	-0.17	-0.31	-0.05	0.41	0.61	-0.11	0.86	-0.25	-0.26	-0.16	0.31	0.49	3.4	0.26	1.07	0.59	-0.19	-0.18	0.33	0.71	0.27	0.37	0.33	0.07	0.08	-0.14	-0.1	0.19	-0.04	0.53	0.05	-0.28	0.11	-0.24	-0.22	-0.26	-0.07	-0.22	-0.25	-0.17	-0.15	-0.05	-0.16	-0.11	-0.13	-0.1	-0.25	-0.23	-0.16
ZHONG_PFC_C2_THY1_POS_OPC	-0.14	-0.16	-0.05	2.23	0.24	0.03	0.68	0.06	0.09	0.14	0.67	0.19	4.32	-0.24	-0.21	0.28	-0.22	-0.25	0.14	0.85	-0.42	-0.18	-0.07	-0.22	-0.37	-0.11	0.2	-0.43	-0.34	-0.17	0.05	-0.27	-0.04	-0.22	-0.28	-0.33	-0.31	-0.25	-0.28	-0.38	-0.26	-0.35	-0.32	-0.36	-0.28	-0.26	-0.24	-0.25	-0.31
GAO_SMALL_INTESTINE_24W_C2_PROCRPOS_PROGENITOR	3.02	0.21	0.63	0.07	0.21	0.05	1.05	1.48	0.78	0.64	1.93	0.68	0.64	1.27	-0.1	0.19	-0.02	-0.25	-0.02	-0.18	-0.26	-0.46	-0.17	0.03	-0.27	-0.31	-0.17	-0.46	-0.22	-0.38	0.03	-0.33	-0.25	-0.42	-0.29	-0.49	-0.27	-0.34	-0.37	-0.41	-0.37	-0.31	-0.28	-0.35	-0.34	-0.33	-0.34	-0.35	-0.4
[truncated: 29 more columns]

## Sheet: Day 3
Table S6. iTF-mediated lineage specification
ID (643)	Gata3	Gata4	Elf5	Cdx2	Dlx3	Dlx5	Dlx4	Pdx1	Gcm1	Gsc	Fos	Pax9	Jun	Tbx5	Nkx2-1	Nkx2-5	Otx2	Fosl1	Fosl2	Zfp36l1	Gli1	Hand1	Mafk	Creb3l2	Ets2	Etv4	Cebpb	Maff	Cited1	Control	Foxn2	Hdac2	Fbxl19	Dpf1	Dnajb6	Arnt	Cited2	Creb3	Tcea1	E2f5	Erf	Hmgn2	Id1	Hopx	Id2	Zfp13	Vgll4	Pole3	Polr2e
DESCARTES_FETAL_LIVER_HEMATOPOIETIC_STEM_CELLS	-0.52	-0.3	-0.61	3.83	-0.25	-0.36	-0.33	-0.48	0.03	-0.52	-0.31	-0.31	0.14	-0.47	0.71	0.63	-0.54	-0.54	-0.58	-0.38	0.05	-0.56	-0.64	-0.26	-0.58	-0.34	-0.19	-0.32	-0.45	-0.41	-0.51	-0.31	-0.46	-0.46	-0.23	-0.42	-0.41	-0.26	-0.43	-0.45	-0.46	-0.34	-0.3	-0.39	-0.31	-0.4	-0.41	-0.3	-0.24
DESCARTES_FETAL_HEART_ELF3_AGBL2_POSITIVE_CELLS	0.4	0.19	-0.36	-0.69	-0.33	-0.24	-0.03	-0.49	0.99	0.89	0.67	0.02	-0.25	0.18	-0.05	0.1	-0.54	0.17	-0.07	1.35	1.35	-0.34	-0.11	-0.32	-0.29	-0.17	-0.55	-0.15	-0.07	-0.42	-0.59	-0.38	-0.48	-0.21	-0.41	-0.44	-0.25	-0.43	-0.5	-0.14	-0.34	-0.36	-0.41	-0.31	-0.34	-0.44	-0.4	-0.28	-0.32
DESCARTES_FETAL_HEART_LYMPHOID_CELLS	-0.61	-0.49	0	0.04	-0.05	-0.42	-0.19	-0.12	0.52	2.15	0.95	3.17	1.13	-0.13	0.43	0.61	-0.35	0	0.69	0.23	-0.25	-0.37	0.47	-0.3	-0.28	-0.06	-0.36	0.12	-0.08	-0.24	-0.15	-0.29	-0.26	-0.15	-0.38	-0.17	-0.17	-0.35	-0.23	-0.2	-0.18	-0.14	-0.13	-0.21	-0.09	-0.06	-0.03	-0.25	-0.25
DESCARTES_FETAL_LUNG_LYMPHOID_CELLS	-0.72	-0.64	0.63	0.07	0.04	-0.54	-0.18	-0.26	1.37	1.79	-0.27	1.77	0.4	0.12	0.18	-0.03	0.26	-0.08	0.84	1.54	-0.1	-0.36	0.25	-0.27	0.18	0.38	0.04	0.63	0.07	-0.2	0.06	-0.21	0.06	-0.06	-0.36	0.13	-0.15	-0.2	-0.24	0.07	-0.15	0	-0.11	-0.02	0.05	0.12	0.29	-0.04	-0.14
DURANTE_ADULT_OLFACTORY_NEUROEPITHELIUM_B_CELLS	-0.43	-0.26	0.95	-0.41	-0.17	-0.25	-0.26	0.86	1.13	-0.1	0.04	2.71	0.18	0.09	0.75	1.11	-0.11	-0.26	0.03	0.66	-0.26	-0.38	-0.1	-0.33	0.2	0	-0.42	-0.24	0.18	-0.32	-0.39	-0.39	-0.23	-0.42	-0.34	-0.14	-0.26	-0.2	-0.25	-0.03	-0.35	-0.13	-0.24	-0.15	-0.2	-0.34	-0.36	-0.21	-0.11
DURANTE_ADULT_OLFACTORY_NEUROEPITHELIUM_CD4_T_CELLS	-0.44	-0.7	0.01	0.91	-0.31	0.49	-0.33	-0.18	1.77	0.25	0.75	1.93	0.06	-0.08	-0.32	-0.17	-0.35	-0.14	-0.01	0.87	-0.02	-0.08	-0.67	-0.45	-0.19	0.03	-0.04	-0.17	-0.1	-0.35	-0.29	-0.48	-0.15	-0.26	-0.26	-0.37	-0.37	-0.31	-0.25	-0.36	-0.39	-0.43	-0.26	-0.27	-0.3	-0.32	-0.28	-0.22	-0.34
DESCARTES_FETAL_THYMUS_THYMOCYTES	-0.31	-0.27	-0.23	0.26	-0.01	-0.39	-0.16	0.2	0.94	1.02	-0.21	0	-0.08	-0.21	-0.21	-0.12	0.08	-0.32	-0.18	-0.02	-0.17	-0.31	0.43	-0.16	-0.18	0.02	-0.16	-0.38	-0.27	-0.29	-0.32	-0.28	-0.23	-0.14	-0.25	-0.32	-0.24	-0.22	-0.32	-0.34	-0.3	-0.33	-0.33	-0.22	-0.31	-0.36	-0.27	-0.26	-0.25
DESCARTES_FETAL_CEREBELLUM_SLC24A4_PEX5L_POSITIVE_CELLS	0.27	0.35	0.81	-0.52	0.78	3.83	-0.33	0.24	-0.18	-0.41	-0.06	2.59	-0.32	-0.37	-0.22	-0.33	0.67	-0.43	-0.3	-0.38	-0.21	-0.36	1.61	-0.34	-0.39	-0.35	-0.37	-0.36	-0.4	-0.41	-0.38	-0.45	-0.4	-0.34	-0.32	-0.33	-0.37	-0.37	-0.38	-0.34	-0.38	-0.39	-0.39	-0.37	-0.38	-0.4	-0.39	-0.34	-0.37
DESCARTES_FETAL_PANCREAS_ACINAR_CELLS	2.83	-0.08	-0.28	-0.47	2.99	3.66	0.08	-0.05	-0.09	1.76	-0.14	0.75	0.03	-0.35	0.09	-0.21	-0.33	-0.24	-0.06	-0.52	-0.24	-0.35	-0.27	-0.18	-0.16	-0.35	-0.04	0.44	-0.17	-0.31	-0.3	-0.34	-0.08	-0.22	-0.21	-0.24	-0.14	-0.14	-0.01	-0.28	-0.31	-0.22	-0.23	-0.16	-0.17	-0.08	-0.2	-0.16	-0.13
DESCARTES_FETAL_STOMACH_NEUROENDOCRINE_CELLS	-0.13	0.48	0.09	0.78	0.36	-0.18	0.35	1.11	1.24	-0.19	0.48	0.41	0.82	-0.05	0.53	-0.01	-0.14	-0.06	-0.03	-0.14	0.02	-0.1	-0.7	-0.07	-0.42	-0.28	-0.55	-0.51	-0.37	-0.35	-0.43	-0.43	-0.25	-0.08	0.04	-0.17	-0.1	0.06	0.18	0.07	-0.38	-0.18	-0.01	-0.04	-0.16	-0.04	-0.1	-0.27	0.02
DESCARTES_FETAL_PANCREAS_SMOOTH_MUSCLE_CELLS	-0.21	-0.31	0.76	-0.55	-0.42	-0.37	-0.29	-0.07	-0.46	0.24	3.63	0.55	3.65	1.46	-0.27	0.47	0.31	3.31	1.72	1.19	-0.35	-0.4	-0.1	-0.16	-0.19	0.31	-0.48	1.09	-0.25	-0.4	-0.4	-0.42	-0.15	-0.39	-0.39	-0.19	-0.36	-0.38	-0.27	-0.21	-0.36	-0.33	-0.24	-0.36	-0.23	-0.3	-0.11	-0.27	-0.29
DESCARTES_FETAL_STOMACH_SQUAMOUS_EPITHELIAL_CELLS	0.77	-0.41	-0.06	-0.16	0.17	-0.21	-0.04	-0.35	-0.13	0	4.25	2.25	4.87	1.52	0.54	1.04	-0.09	2.47	1.46	0.76	-0.1	-0.22	-0.44	0.01	-0.38	-0.24	-0.62	-0.36	-0.21	-0.43	-0.45	-0.29	-0.5	-0.35	-0.42	-0.46	-0.48	-0.42	-0.41	-0.21	-0.45	-0.42	-0.29	-0.35	-0.38	-0.34	-0.45	-0.4	-0.44
GAO_LARGE_INTESTINE_24W_C10_ENTEROCYTE	3.48	-0.08	-0.42	0.21	-0.06	0.63	-0.42	-0.26	0.66	-0.39	2.58	0.98	4.74	0.8	0.44	0.16	-0.48	0.58	0.34	-0.55	-0.33	-0.55	-0.16	-0.47	-0.43	-0.21	-0.17	-0.57	-0.14	-0.36	-0.47	-0.28	-0.45	-0.42	-0.5	-0.45	-0.42	-0.38	-0.41	-0.36	-0.44	-0.5	-0.46	-0.38	-0.47	-0.44	-0.36	-0.46	-0.42
DESCARTES_FETAL_HEART_MEGAKARYOCYTES	-0.29	-0.39	-0.03	-0.07	0.77	0.86	-0.18	0.32	0.54	0.35	0.44	0.07	0.43	0.14	-0.15	0.16	-0.03	-0.22	-0.39	-0.62	-0.13	-0.41	-0.54	-0.32	-0.13	-0.12	-0.2	-0.45	-0.21	-0.38	-0.39	-0.33	-0.42	-0.27	-0.21	-0.22	-0.29	-0.23	-0.17	-0.33	-0.38	-0.26	-0.24	-0.27	-0.2	-0.38	-0.31	-0.33	-0.2
DESCARTES_FETAL_PANCREAS_STROMAL_CELLS	-0.46	-0.46	0.12	-0.49	0.11	4.12	-0.2	-0.2	0.9	0.63	0.09	0.16	1.27	-0.16	0.22	3.07	-0.15	-0.22	-0.35	0.13	-0.31	-0.38	-0.49	-0.21	-0.18	-0.24	-0.23	0.02	-0.26	-0.35	-0.21	-0.11	-0.38	-0.26	-0.19	-0.22	-0.19	-0.24	-0.18	-0.32	-0.23	-0.27	-0.15	-0.25	-0.23	-0.32	-0.26	-0.21	-0.3
DESCARTES_MAIN_FETAL_CARDIOMYOCYTES	-0.41	-0.31	-0.37	-0.67	1.08	3.7	-0.03	0.36	1.49	-0.62	-0.5	0.26	0.42	0.09	1.03	0.11	-0.15	-0.36	-0.4	-0.65	-0.23	-0.29	0.42	-0.17	-0.33	-0.04	-0.53	-0.11	-0.21	-0.36	-0.26	-0.3	-0.04	-0.34	-0.16	-0.09	-0.35	-0.37	-0.26	-0.12	-0.33	-0.18	-0.31	-0.27	-0.32	-0.27	-0.03	-0.2	-0.27
DESCARTES_FETAL_SPLEEN_STROMAL_CELLS	0.32	0.23	-0.4	-0.57	0.57	1.77	-0.48	1.21	-0.09	-0.54	-0.28	-0.09	0.58	0.11	0.04	0.68	0.62	-0.35	-0.32	0.92	-0.1	0.12	-0.3	-0.37	-0.48	-0.41	-0.1	-0.48	-0.45	-0.51	-0.14	-0.52	-0.32	-0.4	-0.41	-0.43	-0.42	-0.35	-0.22	-0.35	-0.39	-0.35	-0.42	-0.41	-0.44	-0.44	-0.43	-0.38	-0.46
DESCARTES_MAIN_FETAL_INTESTINAL_EPITHELIAL_CELLS	0.14	1.88	-0.11	-0.47	0.52	2.18	0.42	0.92	0.34	0.86	0.31	0.54	1.26	0.21	0.11	0.15	0.8	-0.26	-0.34	-0.48	-0.37	-0.47	-0.5	-0.29	-0.29	-0.32	-0.34	-0.06	-0.1	-0.35	-0.38	-0.12	-0.32	-0.29	-0.28	-0.2	-0.29	-0.31	-0.33	-0.29	-0.31	-0.31	-0.31	-0.36	-0.31	-0.33	-0.4	-0.37	-0.25
DESCARTES_MAIN_FETAL_SLC26A4_PAEP_POSITIVE_CELLS	0.43	0.99	0.07	0.7	0.69	4.21	0.38	3.01	0.39	0.26	0.08	2.18	1.67	0.23	0.8	2.35	0.37	-0.28	-0.21	0.08	-0.24	-0.23	-0.68	0.05	-0.29	0.14	0.05	2.05	-0.23	-0.24	-0.23	-0.31	-0.21	-0.16	-0.26	-0.24	-0.26	-0.19	-0.24	-0.18	-0.31	-0.25	-0.16	-0.3	-0.25	-0.11	-0.42	-0.27	-0.34
DESCARTES_MAIN_FETAL_RETINAL_PROGENITORS_AND_MULLER_GLIA	-0.16	-0.34	0.34	0.71	1.18	4.74	0.79	1.25	0.38	-0.08	0.12	1.22	1.87	-0.05	1.65	0.65	4.1	-0.26	-0.25	-0.28	0.25	-0.28	-0.64	-0.25	-0.08	-0.05	-0.09	0.04	-0.13	-0.32	-0.36	-0.09	-0.25	-0.23	-0.29	-0.32	-0.22	-0.14	-0.12	-0.02	-0.23	-0.22	-0.09	-0.2	-0.13	-0.24	-0.26	-0.2	-0.32
DESCARTES_FETAL_CEREBELLUM_GRANULE_NEURONS	-0.41	-0.42	0.34	1.19	0.29	0.83	0.7	3.59	3.96	1.8	-0.35	0.64	1.22	-0.39	0.33	0.79	-0.29	-0.39	-0.4	-0.43	-0.4	-0.36	-0.41	-0.38	-0.37	-0.36	-0.38	-0.4	-0.29	-0.42	-0.41	-0.39	-0.38	-0.39	-0.39	-0.39	-0.4	-0.39	-0.39	-0.37	-0.4	-0.38	-0.38	-0.39	-0.39	-0.39	-0.4	-0.39	-0.39
DESCARTES_FETAL_HEART_SCHWANN_CELLS	0.51	-0.35	-0.19	1.71	0.35	0.56	0.13	2.23	1.85	0.03	0.24	0.17	0.02	-0.05	0.81	0.92	-0.32	0.14	-0.12	0.98	0.04	-0.18	-0.32	-0.18	-0.19	-0.37	-0.3	0.02	-0.34	-0.31	0.1	-0.04	-0.48	0.04	-0.26	-0.28	-0.24	-0.23	-0.06	-0.19	-0.26	-0.27	-0.13	-0.12	-0.2	-0.19	-0.11	-0.35	-0.07
DESCARTES_FETAL_INTESTINE_ENS_GLIA	0.45	1.15	-0.04	-0.5	0.49	0.57	0.16	2.7	3.33	0.67	0.41	0.29	2.62	0	0.97	0.12	-0.09	-0.05	-0.36	0.39	0.16	-0.27	-0.03	-0.3	-0.24	-0.36	-0.17	0.17	-0.27	-0.28	0.15	-0.15	-0.31	-0.04	-0.28	-0.23	-0.13	-0.2	-0.09	-0.28	-0.24	-0.28	-0.37	-0.33	-0.24	-0.23	-0.07	-0.38	-0.25
DESCARTES_FETAL_STOMACH_ENS_NEURONS	-0.5	-0.15	-0.28	1.73	-0.1	0.68	-0.14	3.67	3.16	1.39	-0.05	0.28	4.54	-0.39	0.47	0.07	-0.14	-0.45	-0.15	-0.34	-0.5	-0.46	1.24	-0.25	-0.09	-0.24	-0.2	-0.13	-0.51	-0.29	-0.51	-0.6	-0.68	-0.17	-0.16	-0.07	-0.23	-0.3	-0.18	-0.26	-0.47	-0.22	-0.51	-0.23	-0.27	-0.39	-0.25	-0.39	-0.31
DESCARTES_MAIN_FETAL_VISCERAL_NEURONS	-0.42	1.16	-0.56	2.1	-0.11	1.43	-0.08	1.89	2.38	1.42	-0.15	0.35	3.1	-0.37	1.01	-0.19	-0.41	-0.36	-0.35	-0.04	0.07	-0.5	1.38	-0.28	-0.51	-0.62	-0.34	0.58	-0.42	-0.33	-0.32	-0.44	-0.65	-0.44	-0.45	-0.35	-0.32	-0.4	-0.42	-0.34	-0.54	-0.28	-0.46	-0.35	-0.38	-0.45	-0.51	-0.45	-0.41
DESCARTES_FETAL_HEART_LYMPHATIC_ENDOTHELIAL_CELLS	0.53	1.36	-0.02	2.57	0.18	0.52	-0.32	0.48	3.75	-0.56	-0.24	0.42	1.61	0.36	0.43	0.5	0.41	-0.3	-0.19	0.26	-0.29	-0.46	-0.44	-0.34	-0.23	0.14	-0.41	-0.38	-0.33	-0.46	-0.54	-0.46	-0.45	-0.48	-0.42	-0.39	-0.41	-0.34	-0.32	-0.42	-0.39	-0.41	-0.42	-0.4	-0.41	-0.37	-0.35	-0.41	-0.35
DESCARTES_MAIN_FETAL_METANEPHRIC_CELLS	0.07	2.73	-0.44	6.49	1.12	1.85	-0.19	0.79	5.91	-0.37	-0.35	1.74	1.57	-0.36	1.76	1.08	0.01	-0.31	-0.28	-0.49	0.21	-0.39	0.89	-0.42	-0.13	-0.27	-0.05	-0.49	-0.38	-0.33	-0.35	-0.27	-0.28	-0.18	-0.3	-0.11	-0.28	-0.26	-0.18	-0.29	-0.29	-0.25	-0.27	-0.26	-0.23	-0.32	-0.29	-0.14	-0.24
DESCARTES_MAIN_FETAL_AMACRINE_CELLS	0.32	2.14	-0.32	5.5	2.28	2.35	-0.15	0.76	5.28	-0.3	-0.23	0.14	0.55	-0.21	5.36	0.11	-0.14	-0.3	-0.27	-0.26	-0.09	-0.23	-0.72	0.25	-0.26	-0.23	-0.53	-0.55	-0.35	-0.33	-0.32	-0.46	-0.27	-0.26	-0.31	-0.41	-0.41	-0.34	-0.36	-0.34	-0.34	-0.37	-0.37	-0.39	-0.35	-0.38	-0.34	-0.34	-0.37
DESCARTES_MAIN_FETAL_HORIZONTAL_CELLS	-0.3	-0.12	0.15	4.04	0.2	0.97	0.23	0.31	5.03	-0.18	0.32	0.77	1.28	0.05	0.39	1.04	0.51	0	-0.19	-0.57	-0.11	-0.15	-0.74	-0.26	-0.19	0.14	-0.04	0.02	-0.28	-0.31	-0.23	-0.37	-0.31	-0.19	-0.24	-0.42	-0.26	-0.16	-0.23	-0.18	-0.27	-0.31	-0.36	-0.35	-0.32	-0.33	-0.29	-0.38	-0.44
DESCARTES_MAIN_FETAL_INHIBITORY_INTERNEURONS	-0.38	0.94	-0.33	0.87	0.59	1.04	0.56	2.15	3.66	-0.48	-0.3	0.74	-0.14	-0.09	1.06	-0.2	0.31	-0.4	-0.29	-0.16	-0.21	-0.44	0.54	0.12	-0.1	-0.04	-0.22	-0.01	-0.41	-0.4	-0.52	-0.31	-0.28	-0.37	-0.3	-0.41	-0.39	-0.24	-0.15	-0.35	-0.36	-0.35	-0.36	-0.2	-0.4	-0.27	-0.16	-0.31	-0.28
DESCARTES_FETAL_LUNG_LYMPHATIC_ENDOTHELIAL_CELLS	-0.27	-0.51	1.25	3.12	1.16	0.62	0.31	0.47	2.61	0.03	1.78	0.68	2.86	1.05	0.36	1.54	0.35	0.76	0.65	-0.33	1	-0.35	-0.41	-0.01	-0.21	0.24	-0.26	0.21	-0.37	-0.34	-0.54	-0.28	-0.32	-0.38	-0.44	-0.46	-0.42	-0.37	-0.41	-0.28	-0.38	-0.29	-0.36	-0.37	-0.37	-0.34	-0.38	-0.39	-0.33
DESCARTES_FETAL_EYE_LENS_FIBRE_CELLS	-0.17	0.4	0.25	1.02	0.04	0.15	0.68	0.67	2.79	-0.27	0.65	-0.22	2.84	1.51	0.36	0.64	0.19	-0.13	-0.29	-0.24	-0.25	-0.27	-0.51	-0.16	-0.33	-0.18	0.14	0.09	-0.34	-0.36	-0.4	-0.5	-0.46	-0.42	-0.31	-0.26	-0.44	-0.44	-0.41	-0.46	-0.42	-0.42	-0.39	-0.37	-0.43	-0.41	-0.29	-0.34	-0.38
GAUTAM_EYE_IRIS_CILIARY_BODY_CYTOTOXIC_T_CELLS	0.59	0.89	1.34	3.25	0.65	1.22	0.09	1.6	6.86	0.26	3.15	2.45	3.88	1.98	1.3	1.63	2.17	0	-0.08	-0.93	0.29	-0.15	-0.3	0	0	0.03	-0.03	-0.34	-0.28	-0.23	-0.44	-0.12	-0.41	-0.27	-0.33	-0.31	-0.39	-0.23	-0.3	-0.31	-0.35	-0.28	-0.34	-0.34	-0.24	-0.28	-0.42	-0.41	-0.43
DESCARTES_FETAL_STOMACH_VASCULAR_ENDOTHELIAL_CELLS	-0.13	-0.6	0.16	2.93	0.03	0.55	-0.32	3.81	4.48	0.12	-0.18	0	2.51	0.68	2	0.88	2.62	-0.28	-0.47	-0.41	0.17	-0.17	0.11	-0.09	0.32	1.75	-0.62	-0.33	-0.11	-0.31	-0.21	-0.26	-0.23	-0.06	-0.1	-0.21	-0.15	-0.28	-0.28	-0.03	-0.14	-0.12	-0.12	-0.13	-0.17	-0.03	-0.18	-0.22	-0.01
DESCARTES_MAIN_FETAL_VASCULAR_ENDOTHELIAL_CELLS	1.07	0.29	1.24	2.67	0.56	1.55	0.12	2.42	3.37	1.26	1.15	1.16	1.71	0.28	0.37	0.96	1.5	0.26	-0.1	0.25	0.74	-0.46	0.69	-0.22	-0.21	1.16	-0.6	-0.74	-0.21	-0.35	-0.43	-0.4	-0.17	-0.29	-0.4	-0.28	-0.41	-0.46	-0.42	-0.34	-0.45	-0.43	-0.33	-0.39	-0.39	-0.48	-0.43	-0.32	-0.25
DESCARTES_FETAL_CEREBELLUM_INHIBITORY_INTERNEURONS	-0.4	-0.43	-0.47	-0.44	-0.39	-0.37	-0.39	-0.39	3.83	0.51	-0.27	-0.21	0.18	0.17	2.48	2.22	2.5	-0.39	-0.37	-0.43	-0.4	-0.4	-0.3	-0.38	-0.41	-0.41	-0.27	-0.01	-0.39	-0.42	-0.4	-0.44	-0.31	-0.35	-0.26	-0.42	-0.41	-0.35	-0.37	-0.36	-0.37	-0.39	-0.36	-0.39	-0.37	-0.39	-0.22	-0.38	-0.43
DESCARTES_MAIN_FETAL_THYMOCYTES	-0.3	-0.34	0.66	0.72	1.07	0.95	0.26	0.4	3.51	0.56	-0.17	0.25	0.51	0.18	1.49	2.17	1.18	-0.33	-0.28	-0.14	0.18	-0.21	0.45	-0.16	-0.15	0.71	-0.04	-0.18	-0.27	-0.31	-0.46	-0.19	-0.39	-0.21	-0.39	-0.27	-0.3	-0.19	-0.41	-0.3	-0.35	-0.17	-0.29	-0.27	-0.34	-0.18	-0.16	-0.24	-0.27
DESCARTES_FETAL_EYE_PHOTORECEPTOR_CELLS	0.37	2.62	-0.14	-0.48	-0.01	0.02	-0.15	0.04	4.25	-0.23	-0.33	-0.39	0.78	-0.3	0.08	-0.46	0.52	-0.32	-0.21	-0.48	-0.18	-0.25	1.37	0.02	-0.22	-0.44	0.01	0.63	-0.33	-0.49	0.11	-0.25	-0.15	-0.28	-0.26	-0.03	-0.23	-0.18	-0.14	-0.08	-0.31	-0.26	-0.14	-0.17	-0.16	-0.17	-0.05	-0.3	-0.1
DESCARTES_FETAL_PANCREAS_ERYTHROBLASTS	-0.11	4.13	-0.21	0.55	0.07	0.07	0.12	0.28	5.22	0.57	0.13	0.98	1.39	0.49	0.68	0.35	1.45	-0.07	-0.46	-0.49	0.2	-0.36	-0.49	-0.18	0.38	0.17	0.08	-0.2	-0.12	-0.26	-0.48	-0.53	-0.13	-0.27	-0.32	-0.44	-0.31	-0.44	-0.47	-0.23	-0.45	-0.3	-0.25	-0.36	-0.28	-0.34	-0.31	-0.33	-0.24
DESCARTES_FETAL_PLACENTA_AFP_ALB_POSITIVE_CELLS	0.41	1.73	-0.24	0.06	-0.15	-0.27	-0.18	-0.29	3.14	0.17	0.05	0.95	1.87	0.7	1.02	1.66	1	0.01	0	0.11	-0.19	-0.38	-0.23	-0.28	-0.09	-0.29	-0.41	-0.43	-0.4	-0.41	-0.43	-0.58	-0.39	-0.5	-0.43	-0.54	-0.49	-0.44	-0.48	-0.49	-0.51	-0.52	-0.49	-0.52	-0.44	-0.49	-0.54	-0.51	-0.47
DESCARTES_FETAL_STOMACH_MUC13_DMBT1_POSITIVE_CELLS	0.98	0.4	-0.2	-0.41	-0.32	0.11	-0.15	-0.18	2.56	0.35	0.18	0.51	0.49	0.44	-0.26	0.55	0.23	-0.22	-0.24	-0.73	-0.15	-0.3	-0.17	-0.15	-0.19	-0.36	-0.5	-0.14	-0.28	-0.3	-0.32	-0.5	-0.25	-0.31	-0.41	-0.33	-0.31	-0.36	-0.34	-0.48	-0.41	-0.42	-0.41	-0.39	-0.32	-0.3	-0.38	-0.29	-0.37
DESCARTES_MAIN_FETAL_NEUROENDOCRINE_CELLS	-0.07	0	-0.38	-0.6	-0.23	0.17	-0.29	0.13	4.69	0.86	0.18	0.5	1.41	-0.42	0.35	0.7	-0.38	-0.38	-0.36	-0.58	-0.36	-0.42	-0.23	-0.35	-0.44	-0.3	-0.41	-0.44	-0.45	-0.29	-0.33	-0.47	-0.44	-0.39	-0.31	-0.25	-0.33	-0.38	-0.38	-0.34	-0.42	-0.41	-0.3	-0.39	-0.35	-0.44	-0.37	-0.39	-0.43
DESCARTES_FETAL_ADRENAL_SLC26A4_PAEP_POSITIVE_CELLS	-0.28	0.11	-0.45	-0.69	0.47	0.31	-0.07	0.65	1.41	-0.3	-0.07	0.63	0.66	-0.05	0.48	0.61	-0.39	-0.31	-0.45	-0.22	-0.29	-0.11	-0.44	0	-0.32	0.02	0.06	-0.61	-0.3	-0.37	0.01	0	-0.4	-0.19	-0.2	-0.28	-0.24	-0.37	-0.48	-0.31	-0.25	-0.25	-0.18	-0.25	-0.21	-0.33	-0.32	-0.24	-0.28
ZHONG_PFC_C2_UNKNOWN_NPC	0.03	0.32	0.28	0.46	0.44	1.03	0.13	0.52	3.33	-0.47	1.84	0.57	1.49	-0.13	0.81	0.48	0.26	0.11	-0.37	-0.13	0.32	-0.52	-0.54	-0.24	-0.17	0.29	0.02	0.5	-0.1	-0.37	-0.03	-0.3	-0.35	-0.37	-0.13	-0.22	-0.32	-0.09	-0.34	-0.26	-0.21	-0.19	-0.26	-0.31	-0.3	-0.36	-0.4	-0.36	-0.25
ZHONG_PFC_C1_NEUROD1_POS_EXCITATORY_NEURON	-0.12	0.97	0.41	0.56	0.33	0.93	-0.05	0.6	4.86	-0.44	-0.38	0.23	4.46	-0.19	1.37	0.69	0.65	-0.3	-0.38	0.56	0.41	-0.4	-0.75	-0.16	-0.35	-0.27	0.01	-0.21	-0.2	-0.32	0.04	-0.46	-0.18	-0.28	-0.03	-0.45	-0.21	-0.05	-0.14	-0.16	-0.29	-0.04	-0.29	-0.24	-0.32	-0.36	-0.45	-0.07	-0.28
ZHONG_PFC_C5_BCL11B_CALB2_POS_INP	-0.44	0.8	0.79	0.55	0.79	1.39	0.71	1.56	6.95	0.12	1.07	0.37	6.53	-0.19	4.28	1.29	1.27	0.09	0.09	-0.18	0.12	-0.37	-0.17	-0.06	-0.27	0.15	0.12	-0.22	-0.12	-0.21	-0.33	-0.28	-0.38	-0.4	-0.08	-0.09	-0.11	-0.25	-0.1	-0.11	-0.07	0.04	-0.12	-0.11	-0.19	0.03	-0.23	-0.05	-0.16
AIZARANI_LIVER_C12_NK_NKT_CELLS_4	0.2	-0.07	3.07	-0.32	-0.16	0.08	0.03	0.12	1.64	1.39	0.17	0.98	0.76	0.22	0.15	1.15	0.32	-0.2	-0.11	0.49	-0.15	-0.45	-0.66	-0.22	-0.24	0.25	-0.23	0.04	-0.24	-0.26	-0.08	-0.19	-0.44	-0.18	-0.29	-0.31	-0.47	-0.1	-0.26	-0.24	-0.29	-0.25	-0.34	-0.25	-0.2	-0.24	-0.2	-0.15	-0.15
CUI_DEVELOPING_HEART_LEFT_ATRIAL_CARDIOMYOCYTE	-0.23	1.13	3.67	0.72	0.29	0.56	-0.36	1.06	3.82	1.29	0.12	1.1	3.37	-0.19	-0.23	-0.04	-0.32	-0.29	-0.31	-0.08	0.61	-0.53	0.33	-0.15	-0.47	-0.01	-0.38	-0.32	-0.36	-0.32	-0.57	-0.42	-0.49	-0.44	-0.27	-0.36	-0.41	-0.36	-0.38	-0.35	-0.38	-0.42	-0.45	-0.44	-0.45	-0.46	-0.52	-0.42	-0.39
DESCARTES_FETAL_EYE_GANGLION_CELLS	-0.39	-0.15	2.12	0.34	1.15	2.02	0.35	1.04	2.26	1.74	0.04	0.24	1.28	-0.02	1.51	1.32	0.41	-0.35	-0.16	-0.29	-0.46	-0.4	-0.28	0.05	-0.19	0.19	-0.5	0.34	-0.14	-0.34	-0.41	-0.33	-0.43	-0.23	-0.23	-0.16	-0.24	-0.4	-0.22	-0.36	-0.43	-0.21	-0.38	-0.27	-0.38	-0.3	-0.31	-0.28	-0.35
DESCARTES_FETAL_ADRENAL_LYMPHOID_CELLS	-0.26	-0.09	1.89	0.37	0.36	0.6	-0.24	0.13	0.91	2.18	1.45	1.52	2.85	0.1	2.36	1.88	0.2	-0.33	-0.27	0.76	-0.2	-0.27	-0.05	0.04	-0.11	0.2	-0.23	0.01	-0.06	-0.33	-0.32	-0.3	-0.47	-0.39	-0.36	-0.46	-0.37	-0.38	-0.32	-0.3	-0.5	-0.31	-0.36	-0.34	-0.37	-0.36	-0.32	-0.37	-0.46
DESCARTES_FETAL_KIDNEY_LYMPHOID_CELLS	-0.08	-0.16	2.01	0.62	0.33	1.14	-0.04	1.02	0.53	2.19	1.46	1.1	1.52	0.44	2.68	1.83	0.43	-0.17	0.08	0.29	-0.06	-0.28	-0.33	0	-0.36	0.04	-0.19	0.41	-0.2	-0.3	-0.33	-0.29	-0.3	-0.4	-0.34	-0.4	-0.31	-0.34	-0.28	-0.28	-0.39	-0.32	-0.32	-0.28	-0.39	-0.35	-0.33	-0.4	-0.32
DESCARTES_FETAL_PANCREAS_LYMPHOID_CELLS	-0.29	-0.53	1.88	-0.53	0.38	1.13	0	0.94	0.54	1.49	2.81	0.67	2.86	0.15	4.12	1.94	1.07	-0.01	-0.04	-0.5	0.55	-0.35	0.32	-0.31	-0.08	0.56	-0.07	-0.35	-0.23	-0.22	-0.23	-0.14	-0.1	-0.26	-0.42	-0.45	-0.29	-0.29	-0.17	-0.22	-0.3	-0.18	-0.24	-0.16	-0.21	-0.09	-0.19	-0.31	-0.31
DURANTE_ADULT_OLFACTORY_NEUROEPITHELIUM_CD8_T_CELLS	-0.47	-0.38	1.7	1.26	-0.37	0.4	-0.14	0.54	0.87	1.99	4.65	3.59	2.01	0.45	2.81	1.7	0.68	0.21	0.09	0.66	0.27	-0.34	-0.85	-0.39	-0.01	0.13	-0.28	-0.42	-0.12	-0.31	-0.32	-0.36	-0.53	-0.34	-0.39	-0.49	-0.45	-0.29	-0.43	-0.42	-0.34	-0.5	-0.42	-0.39	-0.27	-0.49	-0.42	-0.28	-0.5
DESCARTES_FETAL_INTESTINE_LYMPHOID_CELLS	-0.52	-0.53	2.23	0.09	-0.34	-0.48	-0.31	-0.15	1.03	1.01	-0.42	0.52	-0.17	0.29	2.51	1.03	0.19	-0.41	-0.15	-0.35	-0.27	-0.29	0.11	-0.3	-0.25	0.18	-0.02	-0.38	-0.21	-0.3	-0.28	-0.1	-0.22	-0.23	-0.23	-0.2	-0.24	-0.24	-0.19	-0.25	-0.31	-0.28	-0.29	-0.16	-0.19	-0.22	-0.2	-0.26	-0.29
DESCARTES_FETAL_PLACENTA_LYMPHOID_CELLS	-0.11	0.39	2.56	1.27	0.19	0.25	-0.15	0.63	1.37	0.7	0.63	2.18	1	0.13	2.98	1.04	0.53	-0.2	-0.05	0.64	0.19	-0.37	-0.34	-0.14	0.13	0.38	-0.19	0.37	-0.16	-0.3	-0.22	-0.49	-0.11	-0.25	-0.23	-0.3	-0.28	-0.26	-0.18	-0.23	-0.29	-0.28	-0.22	-0.24	-0.26	-0.24	-0.22	-0.17	-0.35
DESCARTES_FETAL_STOMACH_LYMPHOID_CELLS	-0.45	-0.4	1.48	0.72	0.62	1.44	0.07	0.94	2.17	1.91	-0.2	1.5	1.08	0.07	4.4	0.78	1.37	-0.3	-0.46	0.23	0.51	-0.36	0.64	-0.21	0.3	0.5	0.28	-0.18	0.06	-0.23	-0.18	-0.36	-0.1	-0.14	-0.14	0	-0.22	-0.08	-0.25	-0.13	-0.34	-0.12	-0.18	0.07	-0.1	-0.05	0.03	0.01	-0.27
DESCARTES_FETAL_LUNG_BRONCHIOLAR_AND_ALVEOLAR_EPITHELIAL_CELLS	0.76	-0.05	-0.07	-0.29	-0.13	-0.16	-0.22	-0.09	-0.08	1.23	0.7	1.22	1.6	0.79	2.87	1.79	-0.29	-0.1	-0.17	-0.29	0.54	-0.45	-0.19	-0.25	-0.26	-0.16	-0.49	0.05	-0.12	-0.32	-0.37	-0.44	-0.24	-0.16	-0.31	-0.28	-0.3	-0.34	-0.28	-0.26	-0.31	-0.3	-0.28	-0.25	-0.34	-0.24	-0.36	-0.31	-0.3
GAO_LARGE_INTESTINE_ADULT_CF_GOBLET_CELL_SUBTYPE_1	-0.4	0.11	0.14	-0.49	-0.24	0.37	-0.22	0.41	-0.47	-0.09	0.39	0.2	1.31	1.44	3.6	0.36	0.18	-0.25	-0.21	-0.26	0.19	-0.5	0.71	-0.22	-0.17	0.12	-0.52	-0.52	-0.46	-0.53	-0.54	-0.54	-0.5	-0.51	-0.3	-0.27	-0.5	-0.46	-0.47	-0.24	-0.5	-0.48	-0.48	-0.47	-0.49	-0.43	-0.5	-0.49	-0.51
DESCARTES_FETAL_SPLEEN_LYMPHOID_CELLS	-0.01	0.02	2.75	0.88	0.86	1.62	0.23	1.12	0.18	0.19	0.63	0.71	1.92	0.16	0.96	0.35	2.21	-0.24	-0.19	-0.44	0.24	-0.4	-0.34	-0.12	0.16	0.49	-0.12	-0.43	-0.02	-0.32	-0.25	-0.26	-0.24	-0.34	-0.08	-0.16	-0.18	-0.19	-0.33	-0.16	-0.34	-0.15	-0.35	-0.12	-0.16	-0.32	-0.08	-0.24	-0.3
DESCARTES_MAIN_FETAL_UNIPOLAR_BRUSH_CELLS	0.01	-0.17	1.33	0.79	0.27	0.17	-0.33	0.51	-0.55	0.67	-0.51	0.15	0.69	-0.2	1.12	0.19	0.49	-0.33	-0.38	-0.21	-0.33	-0.4	-0.4	-0.43	-0.3	0.06	-0.59	-0.2	-0.4	-0.4	-0.37	-0.51	-0.45	-0.43	-0.27	-0.46	-0.39	-0.41	-0.44	-0.43	-0.47	-0.33	-0.43	-0.42	-0.39	-0.43	-0.33	-0.4	-0.35
GOBP_PHARYNGEAL_SYSTEM_DEVELOPMENT	-0.01	0.11	1.56	2.01	1.52	1.74	0.4	2.08	0.96	0.49	0.2	0.21	0.64	0.77	3.2	2.88	0.19	-0.3	-0.16	-0.16	1.27	-0.26	0.3	0.09	-0.14	0.31	-0.09	0.14	-0.34	-0.39	-0.47	-0.17	-0.5	-0.19	-0.14	-0.3	-0.29	-0.26	-0.42	-0.29	-0.38	-0.35	-0.38	-0.35	-0.28	-0.33	-0.31	-0.36	-0.32
DESCARTES_FETAL_CEREBELLUM_PURKINJE_NEURONS	2.55	2.55	-0.33	2.91	0.75	2.34	0.63	3.12	0.08	-0.06	-0.03	-0.35	2.12	-0.32	1.56	0.72	1.72	-0.24	-0.28	-0.16	0.03	-0.35	-0.43	-0.35	-0.4	-0.19	-0.31	-0.42	-0.38	-0.35	-0.4	-0.39	-0.54	-0.35	-0.38	-0.44	-0.4	-0.38	-0.43	-0.29	-0.36	-0.37	-0.44	-0.4	-0.38	-0.46	-0.41	-0.33	-0.29
DESCARTES_FETAL_CEREBRUM_SKOR2_NPSR1_POSITIVE_CELLS	0.95	1.71	-0.32	3.44	1.62	1.01	1.17	4.2	1.04	0.82	-0.05	0.25	1.83	-0.13	0.78	1.03	3.2	-0.24	-0.42	-0.5	0.06	-0.37	-0.33	-0.42	-0.25	-0.44	-0.53	-0.4	-0.47	-0.28	-0.31	-0.36	-0.51	-0.42	-0.25	-0.45	-0.35	-0.33	-0.4	-0.29	-0.36	-0.41	-0.36	-0.36	-0.35	-0.37	-0.31	-0.41	-0.27
GAO_SMALL_INTESTINE_24W_C2_PROCRPOS_PROGENITOR	0.92	1.89	0.15	5.67	0.96	2.43	0.58	4.57	-0.39	0.2	-0.07	0.29	0.28	-0.36	0.97	0.84	4.51	-0.13	-0.27	0.03	0.06	-0.43	-0.57	2.3	-0.3	-0.12	-0.27	-0.66	-0.34	-0.3	-0.29	-0.31	-0.29	-0.19	-0.28	-0.33	-0.25	-0.29	-0.33	-0.41	-0.3	-0.41	-0.37	-0.32	-0.39	-0.3	-0.32	-0.21	-0.19
GAO_SMALL_INTESTINE_24W_C9_ENTEROENDOCRINE_CELL	-0.06	0.18	0.26	5.22	0.06	0.05	-0.07	4.1	0.8	0.13	0.59	1.25	0.74	-0.04	0.53	1.27	1.42	-0.05	-0.05	0.08	0.08	-0.33	-0.34	-0.14	-0.04	0.36	-0.27	-0.25	-0.22	-0.37	-0.18	-0.26	-0.36	-0.2	-0.17	-0.4	-0.34	-0.11	-0.26	-0.23	-0.24	-0.12	-0.21	-0.29	-0.31	-0.12	-0.18	-0.24	-0.18
DESCARTES_MAIN_FETAL_BIPOLAR_CELLS	-0.03	-0.47	-0.52	2.28	0.26	2.05	0.36	2.35	-0.44	1.01	0.02	-0.11	0.09	-0.26	0.77	1	0.02	-0.39	-0.33	-0.28	-0.35	-0.42	-0.77	-0.11	-0.12	-0.14	-0.38	-0.31	-0.34	-0.37	-0.38	-0.35	-0.27	-0.23	-0.4	-0.31	-0.37	-0.25	-0.29	-0.16	-0.32	-0.33	-0.33	-0.33	-0.36	-0.27	-0.38	-0.3	-0.41
DESCARTES_FETAL_STOMACH_MESOTHELIAL_CELLS	0.46	2.76	-0.51	4.26	0.17	-0.19	-0.35	0.48	0.55	1.69	-0.12	-0.16	0.39	-0.2	0.38	1.61	0.37	-0.2	-0.23	0.17	-0.37	-0.48	-0.24	-0.29	-0.28	-0.47	-0.45	-0.52	-0.28	-0.46	-0.4	-0.31	-0.44	-0.25	-0.23	-0.3	-0.32	-0.35	-0.27	-0.21	-0.3	-0.33	-0.31	-0.33	-0.31	-0.43	-0.43	-0.32	-0.37
DESCARTES_FETAL_PANCREAS_CCL19_CCL21_POSITIVE_CELLS	-0.07	0.91	0.89	3.15	0.26	0.82	0.11	2.08	1.16	1.67	0.12	0.86	0.87	0.17	0.36	0.72	0.1	-0.32	-0.29	-0.24	-0.03	-0.39	-0.49	-0.23	-0.27	-0.18	-0.22	-0.14	-0.18	-0.25	-0.24	-0.33	-0.44	-0.48	-0.23	-0.45	-0.53	-0.27	-0.56	-0.44	-0.46	-0.38	-0.36	-0.43	-0.4	-0.55	-0.42	-0.42	-0.33
GAO_LARGE_INTESTINE_24W_C6_SECRETORY_PROGENITOR	-0.07	0.89	-0.06	2.29	0.49	0.39	0.23	0.47	0.33	1.87	0.13	0.42	0.84	0.25	0.46	0.28	-0.11	-0.21	0.02	-0.03	0	-0.48	-0.18	-0.12	-0.16	-0.13	-0.07	-0.43	-0.1	-0.28	-0.32	-0.21	-0.34	-0.22	-0.15	-0.29	-0.36	-0.41	-0.43	-0.43	-0.38	-0.35	-0.29	-0.36	-0.33	-0.5	-0.27	-0.31	-0.34
BUSSLINGER_GASTRIC_REG3A_POSITIVE_CELLS	0.12	0.32	0.08	4.98	-0.11	0.51	-0.24	0.42	0.1	1.81	0.59	4.69	3.61	0.7	1.7	2.42	0.3	-0.32	-0.23	-0.36	-0.05	-0.54	-0.63	0.13	-0.19	-0.22	-0.57	-0.28	-0.3	-0.28	-0.19	-0.03	-0.57	-0.22	-0.36	-0.15	-0.54	-0.28	-0.3	-0.38	-0.27	-0.31	-0.36	-0.32	-0.23	-0.16	-0.21	-0.3	-0.11
GAO_STOMACH_24W_C5_PUTATIVE_PIT_CELL_PROGENITOR	0.36	1.51	0.4	6.22	0.99	1.72	0.09	0.21	0.28	0.99	0.52	3.11	4.34	-0.07	0.36	1.2	0.03	-0.32	-0.49	-0.09	-0.37	-0.36	-0.37	-0.38	-0.43	-0.23	-0.19	-0.32	-0.27	-0.28	-0.4	-0.34	-0.43	-0.36	-0.37	-0.5	-0.37	-0.31	-0.42	-0.4	-0.42	-0.36	-0.4	-0.41	-0.42	-0.33	-0.41	-0.41	-0.3
DESCARTES_MAIN_FETAL_URETERIC_BUD_CELLS	0.72	1.03	0.77	5	-0.33	0.15	0.05	0.73	0.44	-0.5	-0.18	2.21	2.8	-0.31	0.66	-0.26	-0.36	-0.23	0.05	0.51	-0.36	-0.49	0.23	-0.49	-0.15	-0.4	0.45	0.09	-0.35	-0.46	-0.46	-0.42	-0.35	-0.32	-0.43	-0.42	-0.4	-0.42	-0.43	-0.34	-0.48	-0.4	-0.46	-0.45	-0.36	-0.48	-0.39	-0.32	-0.38
GAO_LARGE_INTESTINE_24W_C8_GOBLET_CELL	-0.04	0.1	-0.44	7.34	0.47	-0.42	0.11	0.3	1.83	0.66	0.35	0.49	2.96	0.45	1.87	1.01	-0.17	0.04	0.16	-0.6	-0.19	-0.34	-0.51	-0.35	-0.38	-0.37	-0.54	-0.19	-0.16	-0.31	-0.33	-0.38	-0.35	-0.28	-0.18	-0.33	-0.19	-0.27	-0.3	-0.21	-0.29	-0.29	-0.3	-0.33	-0.3	-0.22	-0.39	-0.29	-0.29
DESCARTES_FETAL_KIDNEY_VASCULAR_ENDOTHELIAL_CELLS	2.54	2.65	2.28	3.18	0.56	1.14	-0.13	2.2	0.27	0.79	2.69	1.57	0.26	0.29	0.52	0.64	1.7	0.51	0.19	0.09	-0.01	-0.46	0.19	-0.04	0.29	0.78	-0.46	-0.4	-0.34	-0.37	-0.57	-0.55	-0.41	-0.46	-0.49	-0.43	-0.47	-0.44	-0.43	-0.53	-0.53	-0.48	-0.45	-0.45	-0.47	-0.51	-0.51	-0.38	-0.45
MENON_FETAL_KIDNEY_2_NEPHRON_PROGENITOR_CELLS	2.16	2.28	0.58	5.81	0.63	3.01	0	0.49	0.18	1.59	2.69	2.6	1.75	0.34	0.33	2.23	1.75	0.04	-0.02	-0.28	0.17	-0.46	-0.44	-0.38	-0.31	-0.27	-0.41	-0.55	-0.39	-0.33	-0.5	-0.47	-0.52	-0.28	-0.48	-0.49	-0.5	-0.43	-0.42	-0.37	-0.49	-0.46	-0.46	-0.46	-0.49	-0.44	-0.41	-0.45	-0.41
HAY_BONE_MARROW_FOLLICULAR_B_CELL	0.29	1.72	1.6	4.32	0.97	1.39	0.25	0.81	0.78	-0.08	1.22	1.53	1.84	1.36	0.46	-0.3	0.59	-0.08	-0.23	-0.74	0.1	-0.37	-0.62	-0.11	-0.03	0.8	-0.43	-0.39	-0.19	-0.34	-0.36	-0.42	-0.43	-0.24	-0.43	-0.3	-0.31	-0.37	-0.35	-0.22	-0.39	-0.24	-0.32	-0.31	-0.35	-0.29	-0.37	-0.28	-0.42
DESCARTES_FETAL_HEART_SMOOTH_MUSCLE_CELLS	-0.24	-0.5	-0.42	2.33	0.38	0.43	-0.23	-0.31	1.61	0.53	-0.15	0.83	3.12	-0.49	1.13	0.05	0.82	-0.14	-0.31	-0.38	0.05	-0.37	0.42	-0.18	-0.16	-0.11	0.11	0.99	0.06	-0.35	-0.24	-0.32	-0.13	-0.28	-0.18	-0.23	-0.27	-0.09	-0.28	-0.1	-0.1	-0.12	0.02	-0.12	-0.07	-0.19	-0.19	-0.12	-0.26
DESCARTES_MAIN_FETAL_SMOOTH_MUSCLE_CELLS	-0.37	-0.45	-0.52	0.4	0.35	0.7	-0.18	0.12	2.02	1	0.53	1.67	4.34	-0.16	1.17	0.12	0.75	-0.22	-0.12	0.32	0.42	-0.34	-0.09	-0.18	0.03	-0.03	-0.04	1.62	0.17	-0.36	-0.18	-0.2	-0.03	-0.21	-0.17	-0.21	-0.18	-0.06	-0.25	0.28	-0.24	-0.1	-0.21	-0.14	-0.12	-0.19	-0.09	-0.17	-0.27
DESCARTES_MAIN_FETAL_HEPATOBLASTS	0.89	0.34	-0.52	-0.16	-0.28	0.53	0.13	-0.31	-0.02	0.17	-0.08	1.14	2.23	-0.13	0.68	0.04	-0.08	-0.02	-0.01	-0.82	0.76	-0.24	0.09	-0.14	-0.44	-0.27	-0.02	0.31	-0.23	-0.3	0.07	-0.35	-0.28	-0.23	-0.13	-0.26	-0.16	-0.07	-0.12	-0.24	-0.21	-0.22	-0.27	-0.25	-0.23	-0.13	-0.38	-0.24	-0.14
AIZARANI_LIVER_C38_RESIDENT_B_CELLS_3	1.46	1.95	-0.1	0.21	0.07	0.17	-0.08	0.48	0.52	1.13	-0.05	2.65	0.69	-0.04	1.05	0.31	0.36	-0.25	-0.34	-0.22	-0.13	-0.35	0.66	-0.06	-0.28	-0.07	-0.29	-0.14	-0.3	-0.29	-0.33	-0.49	-0.32	-0.51	-0.38	-0.43	-0.37	-0.33	-0.4	-0.34	-0.41	-0.43	-0.4	-0.38	-0.41	-0.42	-0.43	-0.34	-0.35
AIZARANI_LIVER_C8_RESIDENT_B_CELLS_1	1.49	1.85	-0.1	0.42	0.04	-0.03	-0.05	0.56	0.24	1.02	0.63	2.22	2.32	-0.03	1.52	0.11	0.69	-0.17	-0.28	0.21	-0.1	-0.28	-0.51	0.04	-0.28	-0.17	-0.26	-0.33	-0.29	-0.3	-0.24	-0.42	-0.19	-0.37	-0.36	-0.34	-0.34	-0.35	-0.41	-0.33	-0.41	-0.38	-0.38	-0.35	-0.35	-0.34	-0.3	-0.39	-0.35
DURANTE_ADULT_OLFACTORY_NEUROEPITHELIUM_MONOCYTES	2.59	2.66	-0.02	-0.24	-0.19	-0.35	-0.27	-0.04	-0.2	0.29	0.04	1.14	1.42	0.37	-0.19	0.29	0.31	-0.28	-0.4	-0.29	-0.09	-0.5	-0.43	-0.39	-0.5	-0.41	-0.43	-0.43	-0.34	-0.38	-0.46	-0.43	-0.53	-0.45	-0.44	-0.4	-0.39	-0.29	-0.37	-0.29	-0.44	-0.4	-0.43	-0.39	-0.36	-0.48	-0.48	-0.42	-0.34
DESCARTES_MAIN_FETAL_GOBLET_CELLS	3.14	3.59	0.08	1.08	-0.17	-0.04	-0.27	-0.11	-0.45	-0.36	0.08	0.84	1.79	-0.24	3.95	1.94	1.55	-0.39	-0.36	-0.13	-0.46	-0.38	-0.58	-0.34	-0.31	-0.13	-0.36	-0.05	-0.34	-0.32	-0.39	-0.33	-0.3	-0.35	-0.39	-0.42	-0.35	-0.39	-0.42	-0.4	-0.37	-0.33	-0.43	-0.34	-0.4	-0.38	-0.35	-0.41	-0.42
BUSSLINGER_DUODENAL_K_CELLS	-0.29	1.88	-0.04	-0.02	-0.27	0.29	-0.15	0.8	-0.05	0.13	1.75	0.72	1.53	0.1	0.43	0.08	0.13	-0.12	-0.31	-0.25	-0.21	-0.35	-0.73	-0.07	-0.41	-0.05	-0.11	-0.42	-0.27	-0.17	-0.09	-0.41	-0.36	-0.33	-0.24	-0.2	-0.29	-0.37	-0.5	-0.31	-0.42	-0.34	-0.1	-0.32	-0.17	-0.3	-0.26	-0.36	-0.24
DESCARTES_FETAL_SPLEEN_ERYTHROBLASTS	-0.12	0.9	-0.18	-0.14	0.12	0.11	0.04	0.5	0.19	-0.06	1.83	0.32	0.72	0.08	0.77	0.1	-0.25	0.41	-0.08	-0.07	-0.22	-0.42	-0.62	0.17	-0.09	0.25	-0.28	-0.33	-0.01	-0.28	-0.57	-0.32	-0.31	-0.28	-0.28	-0.42	-0.22	-0.35	-0.17	-0.17	-0.4	-0.41	-0.26	-0.29	-0.26	-0.37	-0.24	-0.26	-0.37
DESCARTES_FETAL_STOMACH_PDE1C_ACSM3_POSITIVE_CELLS	-0.13	0.5	-0.24	0.08	0.01	-0.1	0.01	0.8	0.12	0.35	0.66	0.03	0.45	0.08	0.1	0.3	0.04	-0.01	-0.26	-0.39	0.06	-0.34	-0.43	-0.23	-0.04	0.15	-0.4	-0.39	0.05	-0.33	-0.45	-0.39	-0.23	-0.26	-0.18	-0.29	-0.2	-0.2	-0.27	-0.29	-0.24	-0.2	-0.19	-0.27	-0.28	-0.26	-0.18	-0.22	-0.32
DESCARTES_FETAL_CEREBRUM_OLIGODENDROCYTES	2.04	3.01	-0.45	-0.53	0.79	3.12	0.31	0.29	1.81	1.57	-0.05	-0.2	0.3	-0.35	0.57	0.61	0.42	-0.31	-0.32	-0.08	0.25	-0.49	-0.07	-0.32	-0.52	-0.27	-0.31	-0.38	-0.28	-0.39	-0.35	-0.55	-0.53	-0.4	-0.31	-0.45	-0.33	-0.28	-0.24	-0.25	-0.46	-0.33	-0.44	-0.37	-0.41	-0.49	-0.39	-0.39	-0.34
DESCARTES_FETAL_LUNG_STROMAL_CELLS	2.06	2.94	-0.31	-0.62	-0.2	1.42	-0.09	-0.12	1.78	-0.25	-0.11	-0.51	-0.42	0.32	-0.14	0.39	0.12	-0.2	-0.41	0.41	-0.05	-0.53	-0.24	-0.59	-0.37	-0.28	-0.39	-0.24	-0.43	-0.41	-0.57	-0.56	-0.49	-0.5	-0.46	-0.57	-0.45	-0.46	-0.46	-0.42	-0.51	-0.52	-0.46	-0.45	-0.52	-0.48	-0.54	-0.47	-0.54
DESCARTES_MAIN_FETAL_ACINAR_CELLS	3.05	1.94	-0.48	-0.52	-0.09	1.62	-0.12	0.62	1.39	1.92	-0.26	0.48	-0.07	-0.25	2.25	0.74	1.98	-0.35	-0.23	-0.39	-0.06	-0.4	-0.24	-0.06	-0.18	-0.24	0	0.32	-0.21	-0.33	-0.3	-0.33	-0.17	-0.16	-0.3	-0.39	-0.22	-0.18	-0.16	-0.36	-0.31	-0.19	-0.29	-0.23	-0.24	-0.26	-0.3	-0.27	-0.31
CUI_DEVELOPING_HEART_CORONARY_VASCULAR_ENDOTHELIAL_CELL	3.2	3.12	-0.03	1.84	0.47	1.93	0.02	3.02	1.49	0.79	2.17	0.48	0.25	0.08	2.16	2.36	1.09	0.01	-0.16	-0.51	0.06	-0.27	-0.27	-0.16	-0.2	-0.11	-0.42	-0.33	-0.4	-0.37	-0.41	-0.45	-0.46	-0.37	-0.38	-0.38	-0.44	-0.34	-0.4	-0.24	-0.41	-0.36	-0.35	-0.37	-0.42	-0.42	-0.39	-0.35	-0.33
DESCARTES_FETAL_PANCREAS_VASCULAR_ENDOTHELIAL_CELLS	2.74	2.54	0.43	1.09	-0.02	0.6	-0.19	1.29	2.26	0.27	1.72	-0.07	0.21	-0.13	0.08	-0.09	0.13	0.05	-0.04	0.53	0.05	-0.36	0.31	-0.25	0.21	1.25	-0.27	-0.45	-0.35	-0.35	-0.54	-0.52	-0.28	-0.4	-0.43	-0.31	-0.37	-0.41	-0.35	-0.33	-0.49	-0.46	-0.38	-0.45	-0.42	-0.49	-0.44	-0.38	-0.35
DESCARTES_FETAL_INTESTINE_STROMAL_CELLS	2.21	3.01	0.12	0.34	0.28	2.34	0.06	2.41	3.22	-0.03	-0.41	-0.24	3.16	-0.16	1.56	0.77	0.1	-0.47	-0.48	-0.55	0.12	-0.59	-0.54	-0.18	-0.3	-0.33	-0.51	-0.58	-0.48	-0.43	-0.27	-0.42	-0.43	-0.27	-0.46	-0.34	-0.44	-0.19	-0.41	-0.33	-0.38	-0.45	-0.35	-0.44	-0.47	-0.46	-0.36	-0.36	-0.46
DESCARTES_FETAL_MUSCLE_STROMAL_CELLS	2.24	2.85	1.26	0.89	0.54	2.69	0.73	0.97	5.1	0.07	1.66	-0.22	2.13	0.02	1.09	0.63	0.51	-0.17	-0.25	-0.22	0.09	-0.39	-0.6	0.37	-0.36	-0.38	0.12	-0.55	-0.38	-0.34	-0.48	-0.31	-0.45	-0.39	-0.43	-0.41	-0.27	-0.37	-0.44	-0.42	-0.43	-0.46	-0.39	-0.42	-0.44	-0.41	-0.41	-0.43	-0.31
DESCARTES_FETAL_STOMACH_STROMAL_CELLS	1.94	2.54	1.6	0.28	0.42	1.94	0.27	1.52	2.76	0.21	0.35	0.72	1.42	0.03	0.57	2.65	0.53	-0.21	-0.31	-0.22	0.66	-0.52	-0.58	-0.23	-0.28	-0.49	-0.51	-0.65	-0.3	-0.36	-0.31	-0.36	-0.47	-0.33	-0.33	-0.34	-0.31	-0.3	-0.37	-0.28	-0.41	-0.38	-0.43	-0.4	-0.39	-0.37	-0.41	-0.34	-0.41
DESCARTES_FETAL_INTESTINE_LYMPHATIC_ENDOTHELIAL_CELLS	0.4	1.02	-0.1	-0.22	-0.04	2.29	0.1	0.15	1.09	-0.19	0.1	0.15	0.64	0.22	0.26	0.13	0.11	-0.44	-0.4	-0.48	-0.43	-0.54	0.52	-0.38	-0.25	0.16	-0.46	-0.49	-0.29	-0.42	-0.41	-0.44	-0.44	-0.44	-0.42	-0.54	-0.47	-0.47	-0.48	-0.5	-0.5	-0.35	-0.5	-0.41	-0.49	-0.36	-0.42	-0.49	-0.45
DESCARTES_FETAL_CEREBELLUM_OLIGODENDROCYTES	2.21	3.3	-0.37	1.16	0.94	3.6	0.86	1.02	1.36	0.15	-0.06	0.1	0.5	-0.26	0.1	0.38	0.22	-0.41	-0.34	-0.11	-0.07	-0.45	-0.44	-0.34	-0.31	-0.12	-0.06	-0.17	-0.37	-0.32	-0.42	-0.45	-0.43	-0.29	-0.34	-0.45	-0.41	-0.32	-0.31	-0.32	-0.48	-0.33	-0.44	-0.42	-0.41	-0.42	-0.41	-0.34	-0.37
DESCARTES_MAIN_FETAL_OLIGODENDROCYTES	1.87	3.24	0.11	2.4	1.34	4.46	0.31	1.53	0.54	-0.29	-0.4	-0.21	0.95	-0.19	0.75	0.07	-0.16	-0.4	-0.37	-0.1	-0.13	-0.35	-0.27	-0.24	-0.25	-0.09	-0.39	-0.26	-0.32	-0.31	-0.42	-0.39	-0.41	-0.35	-0.21	-0.28	-0.29	-0.23	-0.38	-0.27	-0.37	-0.21	-0.3	-0.32	-0.28	-0.35	-0.25	-0.37	-0.28
GAO_SMALL_INTESTINE_24W_C7_SECRETORY_PROGENITOR	2.45	2.59	-0.43	1.95	0.62	2.92	0.11	1.5	0.39	0.12	-0.44	0.65	0.14	-0.33	0.03	0.69	0.4	-0.34	-0.31	0.03	-0.44	-0.48	-0.36	-0.43	-0.41	-0.34	-0.31	-0.42	-0.31	-0.43	-0.4	-0.48	-0.53	-0.4	-0.46	-0.42	-0.42	-0.33	-0.31	-0.39	-0.38	-0.48	-0.4	-0.4	-0.37	-0.39	-0.31	-0.35	-0.44
DESCARTES_MAIN_FETAL_PHOTORECEPTOR_CELLS	1.87	2.72	0.42	1.66	0.76	2.81	0.32	0.61	0.14	-0.23	0.18	0.21	1.05	0.05	0.12	0.69	1.07	-0.32	-0.35	-0.33	-0.38	-0.44	0.31	-0.38	-0.03	0.01	-0.31	-0.39	-0.13	-0.3	-0.43	-0.4	-0.44	-0.47	-0.44	-0.27	-0.41	-0.44	-0.46	-0.34	-0.46	-0.45	-0.36	-0.39	-0.42	-0.32	-0.37	-0.4	-0.38
GAO_ESOPHAGUS_25W_C3_FGFR1LOW_EPITHELIAL_CELLS	1.09	2.31	0.53	1.47	0.45	1.68	0.1	0.37	1.21	1.34	0.72	0.75	1.36	0.03	0.53	0.78	0.48	0.07	0.1	0.2	-0.07	-0.01	-0.03	-0.38	0.23	0.18	-0.29	0.03	-0.08	-0.22	-0.5	-0.53	-0.09	-0.36	-0.29	-0.31	-0.26	-0.33	-0.12	-0.43	-0.33	-0.34	-0.26	-0.26	-0.27	-0.26	-0.26	-0.22	-0.22
LAKE_ADULT_KIDNEY_C13_THICK_ASCENDING_LIMB	2.23	2.65	0.09	1.51	1.56	3.2	0.19	1.22	2.75	0.23	1	0.41	1.01	0.93	1.27	1.07	0.97	-0.16	-0.21	0.06	0.22	-0.15	-0.44	-0.42	-0.29	-0.19	-0.36	-0.58	-0.37	-0.38	-0.43	-0.38	-0.43	-0.4	-0.44	-0.38	-0.44	-0.38	-0.43	-0.44	-0.45	-0.38	-0.44	-0.41	-0.42	-0.38	-0.39	-0.4	-0.42
LAKE_ADULT_KIDNEY_C15_CONNECTING_TUBULE	2.04	2.49	0.11	2.78	1.48	5.31	0.57	2.42	1.68	0.12	0.99	1.47	3.21	0.79	1.14	2.01	2.35	-0.24	-0.29	-0.41	-0.13	-0.35	-0.38	-0.39	-0.36	-0.24	-0.34	-0.42	-0.4	-0.37	-0.38	-0.42	-0.45	-0.4	-0.42	-0.45	-0.46	-0.38	-0.42	-0.4	-0.45	-0.43	-0.46	-0.42	-0.43	-0.43	-0.43	-0.44	-0.39
LAKE_ADULT_KIDNEY_C16_COLLECTING_SYSTEM_PRINCIPAL_CELLS_CORTEX	2.08	3.05	0.04	2.28	1.08	4.58	0.47	2.55	1.13	0.37	1.14	1.35	3.49	0.59	1.55	2.49	2.3	-0.31	-0.23	-0.36	-0.22	-0.41	-0.57	-0.38	-0.42	-0.3	-0.35	-0.44	-0.4	-0.38	-0.37	-0.35	-0.47	-0.38	-0.42	-0.39	-0.45	-0.43	-0.43	-0.42	-0.41	-0.39	-0.44	-0.39	-0.44	-0.42	-0.42	-0.34	-0.42
LAKE_ADULT_KIDNEY_C1_EPITHELIAL_CELLS_UNASSIGNED	0.42	3.07	0.56	3.09	1.09	2.73	-0.14	1.14	1.03	0.4	-0.17	0.08	2.04	0.72	1.91	1.4	0.39	-0.41	-0.46	-0.06	-0.34	-0.49	-0.53	-0.37	-0.4	-0.4	-0.47	-0.42	-0.47	-0.44	-0.48	-0.43	-0.44	-0.45	-0.44	-0.51	-0.48	-0.45	-0.46	-0.46	-0.46	-0.45	-0.46	-0.48	-0.47	-0.46	-0.39	-0.44	-0.46
LAKE_ADULT_KIDNEY_C3_PROXIMAL_TUBULE_EPITHELIAL_CELLS_S1_S2	1.22	2.61	0.55	2.3	0.64	3.55	0	0.84	1.73	0.64	0.7	0.77	2.52	1.07	1.68	1.54	0.75	-0.3	-0.28	-0.12	-0.13	-0.43	-0.49	-0.41	-0.37	-0.38	-0.45	-0.59	-0.46	-0.39	-0.44	-0.44	-0.42	-0.38	-0.42	-0.43	-0.43	-0.43	-0.43	-0.43	-0.48	-0.41	-0.43	-0.44	-0.43	-0.41	-0.43	-0.46	-0.44
CUI_DEVELOPING_HEART_RIGHT_VENTRICULAR_CARDIOMYOCYTE	-0.17	0.58	-0.19	0	0.1	0.61	-0.12	1.85	0.38	0.51	1.23	2.45	0.97	0.74	0.7	2.13	1	0.23	0.1	0.4	-0.01	-0.44	-0.57	-0.18	-0.29	-0.04	-0.44	-0.32	-0.41	-0.32	-0.36	-0.31	-0.49	-0.4	-0.48	-0.34	-0.52	-0.41	-0.47	-0.36	-0.5	-0.44	-0.47	-0.48	-0.53	-0.49	-0.5	-0.34	-0.47
DESCARTES_FETAL_PLACENTA_VASCULAR_ENDOTHELIAL_CELLS	0.25	1.12	0.76	1.14	0.64	0.7	0.36	1.94	0.18	-0.12	1.3	3.25	1.36	1.25	0.75	1.4	1.76	0.1	-0.06	0.58	0.6	-0.52	0.22	-0.15	0.11	1.62	-0.63	-0.48	-0.18	-0.32	-0.49	-0.33	-0.13	-0.28	-0.24	-0.32	-0.37	-0.31	-0.3	-0.43	-0.42	-0.4	-0.44	-0.47	-0.44	-0.44	-0.41	-0.36	-0.29
DESCARTES_FETAL_STOMACH_MYELOID_CELLS	0.87	0.31	1.09	-0.64	-0.08	0.68	-0.2	0.24	0.43	0.75	1.94	2.09	1.72	0.48	0.63	1.98	3.29	0.46	0.08	-0.14	-0.17	-0.38	0.13	-0.17	-0.27	-0.37	-0.18	-0.03	-0.19	-0.35	-0.46	-0.31	-0.26	-0.38	-0.3	-0.39	-0.24	-0.37	-0.46	-0.27	-0.51	-0.2	-0.35	-0.38	-0.35	-0.49	-0.42	-0.43	-0.27
DESCARTES_MAIN_FETAL_ANTIGEN_PRESENTING_CELLS	-0.23	-0.09	0.81	0.61	1.58	2.1	-0.1	0.53	0.35	0.04	1.41	3.17	3.32	0.09	0.55	1.63	4.05	-0.08	0.12	0.57	-0.12	-0.28	0.28	-0.22	0.11	-0.15	0.29	0.36	-0.14	-0.31	-0.33	-0.3	-0.22	-0.26	-0.29	-0.2	-0.28	-0.27	-0.18	-0.27	-0.38	-0.27	-0.3	-0.27	-0.28	-0.28	-0.31	-0.28	-0.27
DESCARTES_FETAL_STOMACH_PARIETAL_AND_CHIEF_CELLS	0.68	1.14	0.86	0.25	0.05	0.58	-0.08	-0.02	-0.08	-0.06	0.24	4.07	1.84	-0.25	1.77	1.1	0.81	-0.2	-0.18	0.43	-0.14	-0.3	1.43	-0.34	0.08	0.33	-0.3	-0.08	-0.29	-0.34	-0.26	-0.38	-0.32	-0.3	-0.31	-0.3	-0.24	-0.16	-0.28	-0.29	-0.32	-0.28	-0.33	-0.19	-0.19	-0.32	-0.32	-0.21	-0.34
DESCARTES_MAIN_FETAL_AFP_ALB_POSITIVE_CELLS	0.13	0.62	0.04	-0.05	0.28	0.78	0.05	-0.06	0.2	1.93	0.68	2.02	0.68	0.61	0.33	1.86	0.44	-0.25	-0.28	-0.56	0.12	-0.41	-0.44	-0.22	-0.3	-0.24	-0.62	0.03	-0.36	-0.28	-0.52	-0.49	-0.26	-0.47	-0.45	-0.52	-0.44	-0.52	-0.5	-0.6	-0.56	-0.49	-0.5	-0.5	-0.51	-0.53	-0.47	-0.54	-0.59
ZHONG_PFC_C1_ASTROCYTE	-0.13	1.76	1.64	0.09	0.15	0.64	0.05	0.17	0.06	1.4	0.29	1.17	1.34	0.58	0.87	1.43	0.89	-0.21	-0.26	-0.15	-0.31	-0.5	-0.32	-0.39	-0.4	-0.26	-0.14	-0.44	-0.15	-0.39	-0.53	-0.26	-0.48	-0.37	-0.42	-0.45	-0.51	-0.37	-0.48	-0.46	-0.49	-0.43	-0.44	-0.45	-0.52	-0.51	-0.44	-0.4	-0.43
DESCARTES_FETAL_ADRENAL_SYMPATHOBLASTS	0.01	0.14	-0.2	0.04	1.91	2.15	0.21	1.31	0.45	1.71	0.09	-0.24	5.26	1.02	1.94	0.37	-0.36	-0.2	-0.28	0.31	-0.24	-0.21	-0.1	-0.23	-0.19	-0.29	0.05	-0.12	-0.25	-0.3	-0.41	-0.31	-0.33	-0.37	-0.42	-0.22	-0.29	-0.28	-0.36	-0.29	-0.27	-0.35	-0.32	-0.23	-0.34	-0.34	-0.33	-0.36	-0.26
DESCARTES_FETAL_KIDNEY_MEGAKARYOCYTES	0.18	0.24	0	0.66	0.32	1.44	-0.07	0.44	0.39	0.92	0.64	0.39	4.12	0.09	1.43	0.32	-0.08	-0.17	-0.2	-0.19	-0.22	-0.4	-0.52	-0.35	-0.26	-0.21	-0.22	-0.34	-0.18	-0.24	-0.28	-0.47	-0.26	-0.26	-0.13	-0.2	-0.25	-0.22	-0.22	-0.23	-0.29	-0.21	-0.17	-0.23	-0.14	-0.23	-0.34	-0.13	-0.23
DESCARTES_MAIN_FETAL_MUC13_DMBT1_POSITIVE_CELLS	-0.27	0.04	-0.59	0.06	-0.31	0.4	-0.25	0.52	-0.2	0.21	1.39	0.15	4.48	-0.15	0.63	1.11	0	0.78	0.44	-0.16	-0.35	-0.19	-0.28	-0.22	-0.19	-0.09	-0.19	-0.5	-0.05	-0.31	-0.4	0.06	-0.26	-0.3	-0.3	-0.39	-0.28	-0.22	-0.3	-0.19	-0.32	-0.32	-0.27	-0.25	-0.24	-0.19	-0.27	-0.25	-0.3
DESCARTES_FETAL_PLACENTA_TROPHOBLAST_GIANT_CELLS	-0.41	-0.52	0.85	-0.48	-0.16	0.6	-0.05	1.03	0.35	2.29	0.64	3.22	6.16	1.7	0.45	0.5	0.64	-0.01	-0.33	-0.24	-0.08	-0.31	-0.23	-0.23	-0.1	0.39	-0.64	-0.37	-0.16	-0.25	-0.65	-0.38	-0.3	-0.27	-0.11	-0.39	-0.29	-0.38	-0.41	-0.2	-0.38	-0.29	-0.29	-0.29	-0.36	-0.4	-0.3	-0.34	-0.36
DESCARTES_MAIN_FETAL_ADRENOCORTICAL_CELLS	-0.35	0.13	1.39	1.67	0.18	1.95	0.13	0.47	0.58	-0.61	0.87	0.63	1.28	0.38	0.49	1.22	0.93	0.2	-0.05	-0.26	-0.12	-0.17	0.02	0.04	-0.3	-0.03	-0.21	0.74	-0.27	-0.19	-0.31	-0.19	-0.39	-0.18	-0.27	-0.14	-0.36	-0.35	-0.24	-0.16	-0.34	-0.22	-0.2	-0.29	-0.31	-0.25	-0.33	-0.34	-0.27
BUSSLINGER_ESOPHAGEAL_EARLY_SUPRABASAL_CELLS	0.49	1.51	0.35	4.43	0.4	3.54	0.35	1.21	1.36	0.27	0.97	1.96	3.89	0.29	1.64	1.78	0.18	-0.15	-0.14	0.11	0.38	-0.52	-0.36	-0.45	-0.09	0.15	-0.32	0.4	-0.21	-0.26	-0.31	-0.08	-0.28	-0.12	-0.34	-0.32	-0.16	-0.07	-0.32	-0.17	-0.24	-0.2	-0.26	-0.2	-0.22	-0.34	-0.27	-0.27	-0.19
DESCARTES_FETAL_EYE_RETINAL_PIGMENT_CELLS	0.27	0.68	-0.24	4.41	0.44	1.82	0.4	0.77	0.39	-0.31	0.22	0.9	2.92	-0.09	1.04	0.8	0.54	-0.34	-0.58	0.49	-0.07	-0.65	0.07	-0.04	-0.19	-0.41	-0.64	0.25	-0.18	-0.46	-0.33	-0.36	-0.24	-0.32	-0.55	-0.18	-0.43	-0.13	-0.43	-0.04	-0.5	-0.13	-0.44	-0.45	-0.4	-0.38	-0.29	-0.21	-0.51
DESCARTES_FETAL_PANCREAS_ENS_GLIA	0.36	-0.05	-0.06	3.78	1.84	4.06	0.95	2.69	0.92	-0.13	-0.08	0.8	3.19	0.14	1.53	2.8	0.18	-0.27	-0.44	1.29	-0.17	-0.29	-0.11	-0.24	-0.41	-0.37	-0.45	-0.05	-0.29	-0.28	0.02	-0.14	-0.51	-0.31	-0.21	-0.41	-0.27	-0.25	-0.25	-0.35	-0.38	-0.28	-0.29	-0.36	-0.35	-0.31	-0.25	-0.5	-0.24
DESCARTES_FETAL_EYE_SMOOTH_MUSCLE_CELLS	0.29	0.77	-0.08	3.6	1.25	4.71	-0.1	0.52	-0.33	0.25	-0.1	0.51	2.91	-0.1	2.4	2.08	0.29	-0.22	-0.24	0.2	-0.29	-0.33	1.05	0.09	-0.35	0.11	-0.01	0.06	-0.25	-0.33	-0.32	-0.55	-0.45	-0.4	-0.22	-0.42	-0.37	-0.28	-0.29	-0.27	-0.34	-0.31	-0.16	-0.29	-0.37	-0.35	-0.4	-0.4	-0.49
FAN_EMBRYONIC_CTX_BIG_GROUPS_EXCITATORY_NEURON	0.39	1.16	0.51	4.97	1.98	4.22	0.29	1.03	0.64	-0.18	-0.03	-0.02	2.67	0.3	3.42	2.67	0.07	-0.23	-0.42	0.53	-0.25	-0.49	-0.72	-0.12	-0.15	-0.12	-0.64	-0.08	-0.41	-0.31	-0.58	-0.51	-0.52	-0.41	-0.53	-0.44	-0.51	-0.48	-0.41	-0.37	-0.49	-0.47	-0.47	-0.46	-0.48	-0.41	-0.41	-0.44	-0.4
DESCARTES_MAIN_FETAL_ISLET_ENDOCRINE_CELLS	-0.37	0.84	-0.24	5.6	2.31	5.51	2.44	0.83	3.03	1.8	1.37	2.83	4.81	0.1	3.42	4.57	0.58	-0.04	0.18	1	-0.12	-0.32	-0.33	-0.37	-0.37	-0.2	-0.23	0.52	-0.12	-0.27	-0.38	-0.42	-0.28	-0.31	-0.29	-0.37	-0.26	-0.27	-0.41	-0.27	-0.41	-0.32	-0.39	-0.3	-0.34	-0.47	-0.36	-0.22	-0.29
DESCARTES_MAIN_FETAL_THYMIC_EPITHELIAL_CELLS	0.06	0.21	-0.2	4.28	0.97	4.26	0.78	0.89	1.5	0.87	1.43	1.81	3.62	0.18	2.31	2.01	1.24	-0.19	-0.01	0.41	-0.19	-0.42	2.07	0.03	-0.21	0.19	0	0.11	-0.17	-0.28	-0.25	-0.53	-0.22	0.02	-0.29	-0.31	-0.17	-0.21	-0.06	0.26	-0.31	-0.27	-0.26	-0.21	-0.17	-0.35	-0.14	-0.4	-0.15
DESCARTES_FETAL_PLACENTA_SMOOTH_MUSCLE_CELLS	0.68	1.21	0.86	3.8	0.71	3.12	-0.07	0.88	2.85	0.25	0.65	0.07	1.32	-0.13	0.13	0.57	0.9	-0.29	-0.33	0.45	-0.04	-0.37	-0.23	-0.34	-0.09	0.28	-0.13	-0.27	-0.24	-0.41	-0.09	-0.35	-0.21	-0.32	-0.18	-0.26	-0.21	-0.26	-0.24	-0.32	-0.33	-0.31	-0.24	-0.31	-0.29	-0.21	-0.31	-0.28	-0.15
DESCARTES_MAIN_FETAL_SCHWANN_CELLS	0.23	0.37	-0.39	3.89	1.79	4.61	0.33	0.91	1.47	0.51	0.63	0.69	1.53	-0.18	0.57	1.73	3.03	-0.26	-0.37	-0.42	0.27	-0.13	-0.65	-0.29	-0.33	-0.21	-0.43	-0.25	-0.38	-0.37	-0.14	-0.24	-0.53	-0.36	-0.23	-0.52	-0.44	-0.35	-0.23	-0.38	-0.4	-0.29	-0.24	-0.33	-0.38	-0.32	-0.36	-0.41	-0.29
DESCARTES_MAIN_FETAL_ENS_NEURONS	0.07	0.68	-0.28	4.28	0.79	4.32	0.36	1.72	1.25	0.77	-0.44	0.04	1.6	-0.38	-0.13	0.85	0.23	-0.49	-0.2	-0.21	-0.4	-0.4	-0.52	-0.32	-0.43	-0.25	-0.44	-0.46	-0.29	-0.34	-0.35	-0.18	-0.39	-0.27	-0.34	-0.49	-0.32	-0.36	-0.3	-0.43	-0.4	-0.33	-0.31	-0.4	-0.41	-0.32	-0.25	-0.37	-0.36
TRAVAGLINI_LUNG_CD8_MEMORY_EFFECTOR_T_CELL	-0.35	0.91	0.4	5.15	-0.23	6.64	-0.02	0.3	0.13	0.01	0.21	0.68	2.42	-0.18	0.7	0.51	-0.11	-0.31	-0.11	-0.27	-0.23	-0.45	-0.83	-0.31	-0.34	-0.39	-0.13	0.02	-0.42	-0.32	0.13	-0.49	-0.27	-0.42	-0.48	-0.57	-0.53	-0.31	-0.51	-0.34	-0.49	-0.47	-0.49	-0.39	-0.38	-0.49	-0.47	-0.34	-0.37
DESCARTES_FETAL_CEREBRUM_INHIBITORY_NEURONS	-0.35	-0.24	-0.37	3.37	2.91	5.14	1.22	1.91	0.22	1.06	-0.25	0.97	5.39	-0.34	-0.17	0.11	1.46	-0.36	-0.36	0.17	-0.31	-0.36	-0.25	-0.32	-0.36	-0.36	-0.21	0.71	-0.36	-0.39	-0.36	-0.38	-0.36	-0.37	-0.35	-0.35	-0.36	-0.33	-0.35	-0.32	-0.36	-0.31	-0.35	-0.36	-0.36	-0.34	-0.36	-0.36	-0.37
HU_FETAL_RETINA_AMACRINE	0.12	0.37	-0.09	2.81	1.24	4.63	0.42	1.35	0.15	-0.26	-0.08	2	2.79	0.37	0.21	1.88	0.42	-0.12	-0.17	0.3	0.05	-0.51	0.38	-0.06	-0.33	-0.32	-0.45	-0.2	-0.53	-0.37	-0.42	-0.54	-0.6	-0.32	-0.53	-0.45	-0.47	-0.39	-0.46	-0.46	-0.59	-0.48	-0.62	-0.5	-0.49	-0.59	-0.44	-0.48	-0.47
DESCARTES_MAIN_FETAL_MESOTHELIAL_CELLS	-0.55	-0.49	-0.55	4.19	0.83	4.25	-0.33	0.36	0.37	-0.2	4.4	2.33	2.11	-0.46	-0.3	1.2	-0.07	1.89	0.5	-0.6	-0.46	-0.55	-0.32	-0.47	-0.5	-0.6	-0.38	-0.57	-0.48	-0.34	-0.47	-0.38	-0.45	-0.35	-0.4	-0.36	-0.42	-0.48	-0.48	-0.38	-0.42	-0.38	-0.44	-0.46	-0.44	-0.55	-0.57	-0.46	-0.44
DESCARTES_MAIN_FETAL_CSH1_CSH2_POSITIVE_CELLS	0.08	0.03	-0.14	1.73	0.66	1.93	0.28	0.64	0.72	0.33	1.61	1.53	0.92	0.53	0.06	0.34	0	-0.06	-0.12	1.01	-0.13	-0.3	-0.13	-0.16	-0.19	-0.19	-0.21	-0.48	-0.21	-0.23	-0.38	-0.43	-0.18	-0.29	-0.26	-0.2	-0.34	-0.16	-0.16	-0.25	-0.29	-0.18	-0.28	-0.34	-0.33	-0.35	-0.45	-0.33	-0.25
FAN_EMBRYONIC_CTX_EX_2_EXCITATORY_NEURON	0.88	-0.3	0.58	5.6	2.83	5.34	0.45	2.79	4.83	0.2	3.74	2.77	5.06	0.83	1.97	2.54	0.57	0.46	0.39	1.74	-0.08	-0.15	-0.98	-0.15	0.06	-0.01	-0.6	-0.61	-0.37	-0.31	-0.44	-0.37	-0.52	-0.28	-0.35	-0.44	-0.44	-0.4	-0.32	-0.18	-0.43	-0.32	-0.39	-0.39	-0.44	-0.47	-0.42	-0.33	-0.35
VANGURP_PANCREATIC_GAMMA_CELL	-0.33	0.47	0.55	2.65	2.71	4.9	0.01	1.54	1.36	0.3	1.88	1.09	3.59	0.23	0.09	1.59	-0.26	0.84	0.59	0.35	-0.19	-0.41	0.32	-0.31	-0.34	-0.11	-0.31	0.53	-0.49	-0.37	-0.58	-0.59	-0.42	-0.45	-0.54	-0.58	-0.53	-0.37	-0.57	-0.44	-0.54	-0.46	-0.54	-0.54	-0.43	-0.59	-0.52	-0.38	-0.54
BUSSLINGER_GASTRIC_D_CELLS	0.65	0.01	0.61	5.16	0.64	1.4	0.46	2.29	1.29	0.98	0.52	0.69	2.65	-0.11	2.59	3.48	2.68	-0.23	-0.03	0.95	-0.11	-0.47	-0.61	0.02	-0.37	-0.38	0.18	-0.22	-0.23	-0.32	-0.29	-0.41	-0.26	-0.26	-0.34	-0.32	-0.31	-0.25	-0.13	-0.33	-0.37	-0.34	-0.4	-0.3	-0.36	-0.46	-0.35	-0.16	-0.41
DESCARTES_FETAL_HEART_MYELOID_CELLS	-0.08	1.18	0	4.2	-0.05	0.64	0.37	2.16	1.51	0.56	1.86	0.78	4.18	0.17	3.56	2.74	4.06	1.33	1.04	-0.15	-0.21	-0.32	0.05	-0.09	-0.21	-0.43	-0.34	-0.26	-0.16	-0.24	-0.34	-0.33	-0.44	-0.36	-0.2	-0.25	-0.05	-0.23	-0.32	-0.29	-0.46	-0.29	-0.34	-0.24	-0.35	-0.26	-0.41	-0.23	-0.28
DESCARTES_FETAL_KIDNEY_MESANGIAL_CELLS	0.17	-0.14	0.86	4.38	0.44	1.68	0.03	0.44	3.47	0.58	0.22	0.27	3.09	0.26	3.71	1.4	1.7	-0.35	-0.44	0.25	0.12	0.03	-0.79	-0.38	-0.35	-0.31	-0.4	-0.66	-0.31	-0.28	-0.26	-0.39	-0.25	-0.18	-0.2	-0.21	-0.1	-0.14	-0.28	-0.31	-0.39	-0.15	-0.29	-0.4	-0.19	-0.44	-0.27	-0.26	-0.24
DESCARTES_FETAL_MUSCLE_SMOOTH_MUSCLE_CELLS	-0.21	-0.24	-0.06	2.26	0.55	0.42	0	1.03	1.71	1.57	0.52	0.58	2.06	0.05	1.09	1.42	1.34	-0.12	-0.2	-0.26	0.18	-0.37	-0.68	0.07	-0.05	0.17	-0.23	-0.28	-0.1	-0.3	-0.26	-0.13	-0.1	-0.23	-0.13	-0.08	0.09	0.03	-0.13	-0.13	-0.28	-0.15	-0.08	-0.13	-0.11	-0.04	-0.19	-0.11	-0.12
DESCARTES_FETAL_SPLEEN_VASCULAR_ENDOTHELIAL_CELLS	-0.01	-0.09	0.16	4.03	0.41	-0.01	-0.45	1.42	0.02	-0.45	-0.07	0.48	3.38	0.31	4.99	1.9	0.12	-0.09	-0.25	-0.59	0.25	-0.58	-0.42	-0.41	-0.11	0.06	-0.63	-0.62	-0.4	-0.37	-0.59	-0.41	-0.38	-0.33	-0.2	-0.55	-0.4	-0.36	-0.4	-0.31	-0.47	-0.42	-0.4	-0.41	-0.51	-0.47	-0.48	-0.42	-0.42
ZHONG_PFC_C2_THY1_POS_OPC	-0.18	0.67	0.59	4.52	0.02	0.64	0.07	1.38	-0.46	0.8	-0.12	0.62	3.62	-0.36	1.82	3.94	0.03	-0.32	-0.49	0.6	-0.25	-0.43	-0.45	-0.36	-0.13	0.31	0.4	0.52	-0.39	-0.39	-0.48	-0.46	-0.39	-0.42	-0.37	-0.48	-0.39	-0.32	-0.39	-0.44	-0.42	-0.25	-0.32	-0.43	-0.39	-0.34	-0.45	-0.36	-0.31
GOBP_ECTODERM_DEVELOPMENT	-0.33	0.35	0.39	2.12	-0.01	-0.07	-0.11	-0.06	2.01	-0.02	2.15	0.31	2.62	0.5	1.66	4.61	1.52	-0.22	-0.19	-0.44	-0.3	-0.11	-0.46	-0.48	-0.27	-0.19	-0.32	-0.55	-0.15	-0.26	-0.14	-0.29	-0.46	-0.37	-0.23	-0.35	-0.32	-0.31	-0.38	-0.19	-0.34	-0.36	-0.27	-0.32	-0.33	-0.27	-0.35	-0.24	-0.28
DESCARTES_FETAL_ADRENAL_MYELOID_CELLS	0.67	1.83	1.31	3.09	0.3	1.1	0.2	0.98	0.11	0.11	4.03	2.39	4.44	0.09	2.36	2.08	0.12	1.72	1.3	-0.26	-0.18	-0.24	-0.47	-0.21	-0.16	-0.15	-0.15	-0.2	-0.16	-0.27	-0.34	-0.3	-0.22	-0.29	-0.32	-0.29	-0.22	-0.25	-0.27	-0.32	-0.42	-0.3	-0.29	-0.27	-0.34	-0.26	-0.28	-0.3	-0.24
DESCARTES_FETAL_MUSCLE_MYELOID_CELLS	0.97	1.34	0.6	4.19	0.5	1.54	0.46	1.74	-0.16	-0.42	2.25	1.04	2.35	0.08	3	2.61	0.15	1.04	0.76	-0.36	-0.2	-0.47	0.09	-0.17	-0.2	-0.24	-0.48	-0.05	-0.31	-0.2	-0.58	-0.2	-0.5	-0.32	-0.3	-0.22	-0.2	-0.27	-0.35	-0.34	-0.46	-0.29	-0.36	-0.29	-0.35	-0.24	-0.42	-0.29	-0.32
DESCARTES_FETAL_CEREBRUM_LIMBIC_SYSTEM_NEURONS	-0.11	-0.18	-0.28	4.05	0.68	2.67	-0.32	0.72	0.49	0.2	4.1	1.27	4.26	-0.11	1.09	0.76	0.51	-0.11	0.06	-0.25	-0.18	-0.38	-0.26	-0.41	-0.37	-0.34	-0.36	-0.5	-0.4	-0.36	-0.51	-0.43	-0.42	-0.43	-0.37	-0.39	-0.44	-0.37	-0.43	-0.35	-0.39	-0.39	-0.41	-0.39	-0.39	-0.41	-0.38	-0.43	-0.39
DESCARTES_MAIN_FETAL_LYMPHOID_CELLS	-0.45	0.65	0.43	6.34	0.55	1.68	-0.04	1.67	0.63	-0.37	6.71	3.76	4.92	0.82	1.83	0.41	1.26	0.28	0.12	0.87	0.52	-0.35	0.03	-0.33	0	0.34	-0.5	-0.12	0	-0.33	-0.31	-0.33	-0.33	-0.37	-0.44	-0.43	-0.26	-0.53	-0.34	-0.35	-0.45	-0.4	-0.36	-0.33	-0.31	-0.27	-0.39	-0.34	-0.37
GAO_SMALL_INTESTINE_24W_C6_GOBLET_CELLS	-0.12	0.14	-0.22	3.63	-0.08	0.07	0.25	-0.1	0.14	2.26	5.6	1.45	5.62	0.83	3.67	1.73	0.79	0.33	0.01	-0.1	0.39	-0.39	0.09	-0.09	-0.19	-0.24	-0.31	-0.46	-0.22	-0.41	-0.43	-0.21	-0.15	-0.31	-0.36	-0.19	-0.28	-0.3	-0.28	-0.29	-0.27	-0.17	-0.36	-0.26	-0.35	-0.22	-0.15	-0.29	-0.26
DESCARTES_MAIN_FETAL_ASTROCYTES	0.04	0.32	-0.35	3.25	0.3	0.49	-0.14	0.15	0.44	0.98	1.67	1.07	0.81	0.06	2	0.5	0.93	0.02	0	0.62	0.25	-0.41	0.25	0.42	-0.33	0.15	-0.36	0.12	-0.43	-0.39	-0.3	-0.48	-0.22	-0.36	-0.17	-0.46	-0.29	-0.14	-0.19	-0.27	-0.31	-0.3	-0.41	-0.31	-0.32	-0.34	-0.31	-0.22	-0.31
DESCARTES_FETAL_EYE_ASTROCYTES	0.15	0.16	-0.4	0.01	-0.26	0.44	-0.23	-0.08	1.33	-0.07	-0.42	-0.08	0.93	0.1	1.14	1.22	-0.02	-0.41	-0.55	-0.28	-0.25	-0.4	-0.33	-0.44	-0.47	-0.39	-0.48	0.51	-0.4	-0.4	-0.43	-0.36	-0.34	-0.39	-0.44	-0.4	-0.44	-0.38	-0.44	-0.45	-0.45	-0.41	-0.37	-0.37	-0.4	-0.4	-0.38	-0.37	-0.28
DESCARTES_FETAL_ADRENAL_SCHWANN_CELLS	0.24	0.8	-0.21	0.27	0.67	3.27	0.84	2.51	4.7	0.64	1.48	4.05	2.71	0.06	3.06	3.25	1.1	-0.08	-0.3	0.38	0.35	-0.41	-0.22	-0.2	-0.3	-0.33	0.06	0.31	-0.28	-0.27	-0.19	0	-0.44	-0.19	-0.28	-0.42	-0.28	-0.16	-0.26	-0.26	-0.33	-0.22	-0.22	-0.32	-0.31	-0.29	-0.21	-0.41	-0.31
HU_FETAL_RETINA_HORIZONTAL	0.02	0.07	0.1	0.44	0.73	2.43	0.23	1.67	2.65	-0.1	-0.17	2.05	2.95	0.34	2.22	3.51	0.88	-0.35	-0.21	-0.4	-0.08	-0.44	0.67	-0.04	-0.3	-0.26	-0.48	-0.23	-0.46	-0.34	-0.38	-0.52	-0.57	-0.23	-0.37	-0.46	-0.45	-0.33	-0.35	-0.39	-0.46	-0.42	-0.52	-0.41	-0.4	-0.41	-0.3	-0.45	-0.45
DESCARTES_FETAL_ADRENAL_CHROMAFFIN_CELLS	0	0.07	1.07	2.56	1	3.06	0.51	4.4	8.03	3.82	0.54	2.02	7.88	0.63	1.67	0.97	2.62	-0.16	-0.25	-0.2	0.29	-0.48	-0.76	-0.05	-0.17	-0.28	-0.42	-0.44	-0.16	-0.3	-0.6	-0.44	-0.44	-0.04	-0.14	-0.33	-0.39	-0.36	-0.26	-0.14	-0.36	-0.27	-0.37	-0.27	-0.41	-0.37	-0.29	-0.29	-0.43
GAUTAM_EYE_CORNEA_CYTOTOXIC_T_CELLS	0.08	0.46	0.5	0.76	1.66	3.41	-0.02	1.21	4.29	0.39	1.31	1.06	6.36	0.6	0.83	1.61	0.85	-0.14	-0.19	0.03	0.14	-0.47	-0.51	-0.46	-0.22	-0.13	-0.89	0.15	-0.21	-0.28	-0.33	-0.08	-0.31	-0.33	-0.28	-0.38	-0.42	-0.31	-0.44	-0.27	-0.38	-0.28	-0.29	-0.38	-0.33	-0.35	-0.27	-0.35	-0.5
AIZARANI_LIVER_C17_HEPATOCYTES_3	0.13	0.72	1.21	0.64	0.15	2.15	0.07	2.33	2.54	1.08	0.23	0.18	2.41	0.28	1.89	0.86	2.26	-0.31	-0.24	-0.18	0.17	-0.43	0.1	-0.1	-0.07	0.35	-0.07	-0.57	-0.24	-0.27	-0.43	-0.41	-0.44	-0.44	-0.31	-0.47	-0.49	-0.45	-0.47	-0.41	-0.46	-0.5	-0.46	-0.46	-0.49	-0.48	-0.47	-0.37	-0.44
DESCARTES_FETAL_MUSCLE_SATELLITE_CELLS	0.03	0.8	0.36	0.61	0.87	1.22	0.12	1.88	3.64	0.83	0.46	0.37	4.51	0.66	3.56	1.66	0.8	-0.44	-0.39	-0.4	0.02	-0.52	-0.05	-0.38	-0.2	0.03	-0.49	-0.45	-0.42	-0.4	-0.59	-0.39	-0.4	-0.4	-0.38	-0.39	-0.46	-0.4	-0.44	-0.44	-0.46	-0.37	-0.37	-0.42	-0.41	-0.5	-0.41	-0.42	-0.41
ZHONG_PFC_C2_SOX5_BCL11B_POS_EXCITATORY_NEURON	0.41	0.71	0.14	0.13	0.67	1.8	0.85	3.73	4.25	0.17	0.06	0.45	4.6	0.02	4.49	4.55	3.6	-0.17	-0.19	0.36	0.5	-0.18	-0.86	-0.08	-0.28	-0.02	-0.11	-0.16	-0.29	-0.34	-0.32	-0.33	-0.24	-0.23	-0.35	-0.25	-0.34	-0.12	-0.09	-0.17	-0.27	-0.17	-0.19	-0.19	-0.17	-0.37	-0.29	-0.12	-0.25
BUSSLINGER_DUODENAL_EC_CELLS	-0.18	0.19	0.1	3.33	0.73	1.82	0.27	2.55	0.91	0	1.87	0.5	6.55	-0.35	0.22	1.27	2.2	0.12	-0.12	-0.05	0.05	-0.47	-0.63	-0.2	-0.43	-0.31	-0.43	-0.39	-0.42	-0.35	-0.26	-0.32	-0.18	-0.1	-0.14	-0.22	-0.25	-0.05	-0.01	-0.17	-0.37	-0.15	-0.21	-0.28	-0.27	-0.36	-0.41	-0.26	-0.25
DESCARTES_FETAL_LUNG_NEUROENDOCRINE_CELLS	0.42	0.09	0.01	4.35	0.35	1.19	0.97	4.37	1.31	0.26	1.94	0.73	6.6	-0.29	1.11	1.7	0.53	0.2	0.09	0	0.25	-0.45	0.16	0.05	0.1	0.1	-0.12	-0.29	-0.33	-0.25	-0.08	-0.08	-0.05	-0.23	-0.21	-0.17	-0.22	-0.02	-0.21	-0.12	-0.25	-0.11	-0.21	-0.16	-0.22	-0.26	-0.2	-0.16	-0.18
DESCARTES_FETAL_PLACENTA_STROMAL_CELLS	0.07	-0.03	-0.2	1.43	2.13	3.98	0.71	2.41	1.05	1.9	0.85	0.06	3.78	-0.19	0.41	0.28	0.19	-0.21	-0.36	-0.41	0.22	-0.4	-0.27	-0.25	-0.22	-0.25	-0.16	0.16	-0.05	-0.37	-0.12	-0.32	-0.26	-0.09	-0.08	-0.09	-0.17	-0.06	-0.26	-0.08	-0.14	-0.25	-0.17	-0.12	-0.26	-0.12	-0.21	-0.21	-0.21
DESCARTES_FETAL_HEART_VISCERAL_NEURONS	-0.14	1.37	-0.07	1.85	2.88	4.92	3.29	3.97	1.77	2.61	1.2	0.92	8.08	-0.3	4.88	3.52	1.02	0.38	0.22	0.2	1.7	-0.37	-0.07	-0.01	0.1	-0.14	0	-0.09	0.14	-0.32	-0.2	-0.21	-0.06	-0.15	0.15	-0.08	-0.1	-0.13	0.03	0.18	-0.19	-0.06	-0.01	-0.06	-0.11	-0.14	-0.12	-0.08	-0.1
DESCARTES_FETAL_INTESTINE_ENS_NEURONS	-0.35	-0.02	0.34	2.04	0.75	2.45	1.71	4.86	1.43	1.58	-0.06	0.59	5.88	-0.07	2.2	1.82	1.38	-0.19	-0.02	-0.6	-0.14	-0.53	1.27	-0.1	-0.17	-0.19	-0.43	0.36	-0.33	-0.39	-0.41	-0.45	-0.54	-0.27	-0.09	-0.17	-0.21	-0.29	-0.21	-0.09	-0.41	-0.18	-0.46	-0.17	-0.18	-0.25	-0.24	-0.33	-0.33
DESCARTES_FETAL_LUNG_VISCERAL_NEURONS	-0.24	1.23	0.29	1.8	2.36	3.87	1.72	5.97	2.54	1.29	0.21	0.17	6.95	-0.03	2.5	1.81	1.93	-0.25	-0.2	-0.6	0.48	-0.67	0.96	-0.17	-0.26	-0.53	-0.55	1.1	-0.46	-0.33	-0.46	-0.48	-0.67	-0.38	-0.27	-0.5	-0.18	-0.33	-0.3	-0.28	-0.55	-0.3	-0.46	-0.26	-0.35	-0.42	-0.45	-0.43	-0.4
DESCARTES_FETAL_PANCREAS_ENS_NEURONS	-0.31	-0.08	0.24	2.32	3.02	4.7	1.94	4.72	0.84	1.13	-0.03	0.91	7.26	-0.28	3.03	2.72	1.67	-0.19	-0.24	-0.33	-0.13	-0.48	1.49	0.03	0	-0.2	0.06	0.77	-0.36	-0.33	-0.42	-0.41	-0.57	-0.17	-0.19	-0.12	-0.25	-0.37	-0.25	-0.17	-0.42	-0.12	-0.47	-0.2	-0.3	-0.39	-0.15	-0.33	-0.33
DESCARTES_FETAL_INTESTINE_SMOOTH_MUSCLE_CELLS	0.24	1.02	-0.07	3.15	1.53	4.04	0.18	2.64	2.44	3.59	0.71	1.82	5.7	-0.14	2.29	0.93	0.31	-0.04	-0.34	0.42	1.24	-0.17	-0.02	-0.13	-0.17	-0.29	-0.15	0.01	0.06	-0.29	-0.25	-0.42	-0.07	-0.28	-0.23	-0.2	-0.28	-0.16	-0.2	-0.26	-0.3	-0.22	-0.2	-0.27	-0.29	-0.28	-0.26	-0.26	-0.27
DESCARTES_MAIN_FETAL_SATELLITE_CELLS	0.11	1.25	-0.32	3.09	1.04	1.7	0.2	3.34	1.95	0.93	1	1.17	3.45	0.22	1.16	1.48	0.28	-0.34	-0.38	-0.54	1.36	-0.46	0.1	-0.14	0.01	-0.2	-0.42	-0.31	-0.33	-0.33	-0.45	-0.49	-0.44	-0.37	-0.37	-0.45	-0.38	-0.36	-0.28	-0.37	-0.44	-0.42	-0.42	-0.42	-0.39	-0.26	-0.37	-0.35	-0.45
ZHENG_CORD_BLOOD_C4_PUTATIVE_EARLY_ERYTHROID_COMMITMENT	0.28	1.49	0.51	3.33	0.88	4.71	0.21	4.46	2.77	2.36	1.62	0.89	4.63	0.47	2.63	2.08	1.28	-0.11	0.02	1.18	1.88	-0.49	-0.24	-0.03	-0.17	-0.1	-0.22	-0.22	-0.26	-0.24	-0.19	-0.28	-0.27	-0.23	-0.28	-0.43	-0.38	-0.2	-0.29	-0.26	-0.25	-0.16	-0.21	-0.29	-0.29	-0.3	-0.33	-0.34	-0.19
DESCARTES_FETAL_HEART_SATB2_LRRC7_POSITIVE_CELLS	-0.02	0.3	0.45	1.6	1.19	3.52	0.36	4.26	3.01	1.04	0.01	0.53	3.6	0.69	1.06	1.53	0.83	-0.37	-0.44	1.02	-0.06	-0.4	-0.74	-0.1	0.09	0.23	-0.47	-0.62	-0.44	-0.21	0.01	-0.23	-0.31	-0.37	-0.4	-0.43	-0.29	-0.25	-0.29	-0.26	-0.33	-0.34	-0.34	-0.3	-0.34	-0.42	-0.28	-0.35	-0.31
DESCARTES_MAIN_FETAL_PDE11A_FAM19A2_POSITIVE_CELLS	-0.4	0.1	-0.04	1.57	1.19	3.74	0.77	3.79	0.86	-0.29	-0.36	0.03	3.22	0.04	0.92	1.96	0.07	-0.42	-0.36	0.21	0.11	-0.33	-0.45	-0.23	-0.16	0.19	-0.43	0.23	-0.32	-0.37	-0.37	-0.34	-0.26	-0.18	-0.25	-0.44	-0.35	-0.2	-0.28	-0.28	-0.35	-0.34	-0.34	-0.32	-0.3	-0.25	-0.14	-0.21	-0.31
DESCARTES_FETAL_CEREBELLUM_ASTROCYTES	0.86	1.93	2.06	2.96	0.65	4.06	0.32	4.99	2.87	-0.16	0.79	1.35	3.09	1.81	3.42	1.22	0.67	-0.26	-0.36	0.22	0.79	-0.46	-0.34	-0.01	-0.33	0.25	-0.4	-0.26	-0.39	-0.37	-0.42	-0.42	-0.47	-0.26	-0.45	-0.43	-0.37	-0.3	-0.29	-0.27	-0.41	-0.34	-0.28	-0.35	-0.41	-0.47	-0.37	-0.35	-0.3
MURARO_PANCREAS_EPSILON_CELL	0.02	0.4	0.1	1.24	1.32	4.8	0.58	3.65	2	-0.5	0.92	0.41	1.42	0.67	2.07	1.87	0.24	0.01	-0.25	-0.18	0.7	-0.58	-0.4	-0.33	-0.45	-0.28	-0.4	-0.6	-0.37	-0.32	-0.6	-0.4	-0.46	-0.33	-0.41	-0.5	-0.48	-0.44	-0.43	-0.54	-0.6	-0.47	-0.48	-0.52	-0.47	-0.59	-0.54	-0.45	-0.54
FAN_EMBRYONIC_CTX_NSC_1	-0.1	1.87	0.24	0.81	0.8	3.13	-0.16	3.32	1.02	0.56	0.62	-0.12	3.28	-0.16	0.93	3.24	3.14	-0.26	-0.3	-0.43	1.35	-0.42	0.16	-0.21	-0.13	0.83	-0.36	-0.44	-0.35	-0.33	-0.47	-0.41	-0.3	-0.3	-0.43	-0.43	-0.41	-0.38	-0.37	-0.31	-0.38	-0.34	-0.39	-0.37	-0.39	-0.38	-0.4	-0.37	-0.41
HU_FETAL_RETINA_BIPOLAR	0.43	2.79	0.94	0.97	0.63	2.95	0.31	2.58	1.66	1.16	0.33	0.3	3.48	1.44	3.14	1.26	1.33	-0.4	-0.5	0.17	0.76	0.36	-0.45	-0.38	-0.07	-0.26	-0.47	-0.39	-0.39	-0.35	-0.52	-0.48	-0.45	-0.55	-0.44	-0.52	-0.48	-0.5	-0.51	-0.46	-0.55	-0.48	-0.48	-0.46	-0.52	-0.54	-0.5	-0.45	-0.44
HU_FETAL_RETINA_MULLER	0.39	1.94	-0.1	1.62	1.22	2.59	0.54	3.44	0.6	1.57	1.78	0.13	3.73	2.27	3.11	3.01	2.59	-0.12	-0.12	-0.6	0.61	0.19	-0.4	0.04	-0.1	-0.12	-0.32	-0.5	-0.4	-0.34	-0.5	-0.31	-0.59	-0.31	-0.58	-0.49	-0.42	-0.49	-0.51	-0.52	-0.49	-0.53	-0.55	-0.53	-0.53	-0.52	-0.45	-0.51	-0.47
TRAVAGLINI_LUNG_FIBROMYOCYTE_CELL	0.68	2.23	-0.13	0.93	0.59	4.46	0.63	4.08	0.96	1.53	1.39	-0.1	4.8	2.25	5.64	0.63	0.06	-0.05	0.09	-0.4	2.07	1.08	0.79	0.32	-0.25	-0.14	-0.59	-0.66	-0.33	-0.32	-0.47	-0.41	-0.2	-0.35	-0.38	-0.42	-0.28	-0.27	-0.33	-0.39	-0.37	-0.22	-0.33	-0.32	-0.26	-0.28	-0.34	-0.31	-0.29
DESCARTES_FETAL_LUNG_VASCULAR_ENDOTHELIAL_CELLS	0.83	0.29	0.37	-0.52	0.26	0.8	0.16	2.54	0.36	-0.12	0.26	1.16	3.06	0	0.66	0.64	0.31	-0.22	-0.15	-0.05	-0.25	-0.41	0.38	-0.32	-0.43	0.73	0	0.17	-0.33	-0.35	-0.54	-0.46	-0.46	-0.27	-0.39	-0.19	-0.44	-0.31	-0.3	-0.27	-0.45	-0.26	-0.28	-0.37	-0.42	-0.33	-0.31	-0.16	-0.28
GAUTAM_EYE_IRIS_CILIARY_BODY_SCHWANN_CELLS	0.62	1.91	0.31	0.5	1.17	5.8	0.79	4.87	1.07	-0.27	1.35	1.42	5.85	0.17	2.14	0.65	0.53	-0.14	-0.12	0.28	-0.28	-0.37	-0.65	-0.28	-0.05	-0.33	-0.18	-0.18	-0.2	-0.28	-0.45	-0.43	-0.42	-0.37	-0.37	-0.36	-0.37	-0.28	-0.38	-0.28	-0.47	-0.33	-0.38	-0.35	-0.29	-0.27	-0.28	-0.35	-0.28
TRAVAGLINI_LUNG_VEIN_CELL	0.59	0.88	-0.05	1.41	0.55	3.68	1.77	4.02	-0.24	0.04	2.45	2.41	7.71	0.54	1.61	3.95	1.01	-0.15	-0.29	0.81	-0.35	-0.27	-0.49	-0.16	-0.04	0.01	-0.46	-0.53	-0.37	-0.28	-0.37	-0.44	-0.29	-0.42	-0.44	-0.29	-0.51	-0.43	-0.32	-0.26	-0.33	-0.35	-0.35	-0.41	-0.39	-0.47	-0.29	-0.27	-0.32
DESCARTES_FETAL_INTESTINE_MESOTHELIAL_CELLS	0.29	2.29	-0.27	-0.28	0.08	-0.2	-0.28	0.21	0.75	1.79	2.41	0.17	3.9	0.48	0.69	0.74	0.16	0.44	0.38	0.49	-0.13	-0.53	-0.58	-0.32	-0.54	-0.47	-0.69	-0.64	-0.45	-0.35	-0.54	-0.51	-0.44	-0.42	-0.49	-0.55	-0.51	-0.51	-0.44	-0.4	-0.47	-0.44	-0.49	-0.52	-0.45	-0.47	-0.48	-0.43	-0.43
DESCARTES_FETAL_ADRENAL_STROMAL_CELLS	1.5	2.67	-0.17	-0.12	0.24	1.89	0.34	0.89	2.79	0.36	3.02	0.44	4.68	0.7	0.11	0.57	-0.26	-0.17	-0.14	-0.29	-0.04	-0.41	-0.52	0.25	-0.32	-0.27	-0.37	-0.48	-0.41	-0.4	-0.35	-0.39	-0.48	-0.39	-0.45	-0.43	-0.42	-0.39	-0.44	-0.39	-0.4	-0.45	-0.4	-0.43	-0.46	-0.43	-0.42	-0.42	-0.38
DESCARTES_FETAL_STOMACH_ENS_GLIA	0.35	1.56	-0.21	0.27	0.04	0.32	0.08	1.95	2.92	2.17	2.11	1.24	4.24	0.33	0.49	1.59	-0.2	-0.26	-0.33	0.06	0.06	-0.31	-0.5	-0.18	-0.29	-0.31	-0.13	-0.35	-0.24	-0.32	-0.14	-0.32	-0.35	-0.15	-0.29	-0.38	-0.29	-0.17	-0.25	-0.17	-0.34	-0.23	-0.22	-0.26	-0.22	-0.16	-0.11	-0.27	-0.21
DESCARTES_FETAL_PANCREAS_MYELOID_CELLS	2.23	2.28	-0.16	0.8	0.3	1.61	0.11	0.58	0.93	0.65	0.15	0.53	3	1.47	-0.1	0.1	-0.12	-0.19	-0.32	0.35	-0.1	-0.37	-0.3	-0.39	-0.33	-0.37	-0.35	-0.27	-0.3	-0.34	-0.42	-0.22	-0.43	-0.37	-0.4	-0.33	-0.25	-0.32	-0.39	-0.31	-0.41	-0.32	-0.38	-0.38	-0.34	-0.36	-0.44	-0.4	-0.37
DESCARTES_MAIN_FETAL_STELLATE_CELLS	1.96	3.21	0.7	0.19	0.24	1.29	0.05	1.46	0.67	-0.41	0.12	0.32	3.58	0.27	-0.25	0.47	-0.17	-0.37	-0.45	0.1	-0.16	-0.47	-0.38	-0.32	-0.24	-0.05	-0.47	-0.36	-0.41	-0.4	-0.4	-0.39	-0.36	-0.44	-0.42	-0.43	-0.45	-0.42	-0.42	-0.39	-0.39	-0.42	-0.44	-0.41	-0.44	-0.46	-0.37	-0.44	-0.45
DESCARTES_FETAL_STOMACH_LYMPHATIC_ENDOTHELIAL_CELLS	0.92	1.35	-0.04	0.52	0.21	0.12	0.05	-0.36	0.91	0.81	-0.27	-0.25	3.44	0.12	0.58	-0.07	0.46	-0.42	-0.34	-0.31	0.56	-0.47	-0.45	-0.25	-0.18	-0.07	-0.4	-0.42	-0.3	-0.38	-0.41	-0.42	-0.44	-0.28	-0.37	-0.45	-0.41	-0.37	-0.38	-0.35	-0.39	-0.3	-0.35	-0.37	-0.41	-0.37	-0.37	-0.4	-0.34
DESCARTES_FETAL_LIVER_ERYTHROBLASTS	0.34	3.05	-0.13	0.86	-0.12	1.29	0.09	0.52	1.58	1.32	0.25	0.29	2.85	0.3	1.03	0.2	0.08	-0.13	-0.33	-0.55	-0.12	-0.46	-0.48	0.01	-0.22	-0.1	-0.26	-0.38	-0.15	-0.32	-0.58	-0.26	-0.26	-0.27	-0.22	-0.22	-0.25	-0.29	-0.34	-0.13	-0.41	-0.34	-0.27	-0.31	-0.3	-0.37	-0.3	-0.2	-0.29
HAY_BONE_MARROW_CD34_POS_GRAN	1.44	2.49	-0.05	0.17	-0.1	0.05	-0.14	0.47	1.35	1.56	0.08	0.13	3.02	0.09	1.24	1.63	0.09	-0.25	-0.31	-0.46	-0.24	-0.44	0.51	-0.22	-0.34	-0.3	-0.33	-0.44	-0.33	-0.33	-0.43	-0.39	-0.52	-0.39	-0.47	-0.51	-0.47	-0.43	-0.47	-0.44	-0.49	-0.4	-0.47	-0.45	-0.46	-0.46	-0.47	-0.45	-0.43
CUI_DEVELOPING_HEART_RIGHT_ATRIAL_CARDIOMYOCYTE	-0.05	0.57	0.51	3.44	1.13	2.78	0.07	1	5.77	2.6	0.17	3.34	3.16	-0.05	3.79	2.34	0.33	-0.31	-0.39	-0.09	0.03	-0.54	-0.6	-0.32	-0.33	0.1	-0.7	-0.41	-0.19	-0.37	-0.65	-0.61	-0.53	-0.5	-0.49	-0.37	-0.53	-0.52	-0.54	-0.52	-0.53	-0.52	-0.57	-0.52	-0.56	-0.54	-0.54	-0.56	-0.58
DESCARTES_MAIN_FETAL_DUCTAL_CELLS	0.29	0.55	0.06	1.03	-0.08	2.27	-0.03	0.71	1.59	1.02	-0.26	0.77	0.46	0.08	1.26	0.54	0.48	-0.37	-0.27	-0.19	0.05	-0.41	-0.44	-0.04	-0.29	-0.23	-0.48	-0.43	-0.32	-0.4	-0.37	-0.36	-0.24	-0.24	-0.37	-0.33	-0.35	-0.3	-0.29	-0.35	-0.4	-0.38	-0.39	-0.37	-0.35	-0.37	-0.4	-0.21	-0.27
DESCARTES_FETAL_KIDNEY_ERYTHROBLASTS	1.11	3.18	-0.24	2.22	0.59	2.72	0.39	1.38	4.16	0.9	0.16	1.46	3.91	0.23	1.04	0.67	2.89	-0.03	-0.17	-0.28	-0.17	-0.38	-0.02	-0.18	0.26	0.4	-0.34	-0.13	-0.19	-0.28	-0.33	-0.42	-0.31	-0.29	-0.38	-0.34	-0.31	-0.24	-0.34	-0.28	-0.41	-0.34	-0.3	-0.31	-0.22	-0.31	-0.28	-0.28	-0.29
DESCARTES_FETAL_MUSCLE_ERYTHROBLASTS	0.5	0.42	0.71	2.42	0.38	1.53	0.22	0.74	1.58	-0.28	0.17	1.52	1.85	0.64	0.85	0.56	2.34	-0.14	-0.37	-0.83	0.15	-0.33	-0.56	-0.17	-0.22	0.19	-0.19	0.07	-0.22	-0.22	-0.41	-0.35	-0.25	-0.41	-0.36	-0.5	-0.4	-0.35	-0.4	-0.4	-0.4	-0.37	-0.43	-0.37	-0.37	-0.42	-0.44	-0.35	-0.37
DESCARTES_FETAL_PLACENTA_MYELOID_CELLS	-0.04	2.46	0.35	3.62	0.14	3.3	0.35	2.06	2.5	1.35	0.58	1.55	1.35	0.4	3.36	0.8	3.67	0.09	0.07	-0.47	-0.21	-0.19	-0.08	-0.33	-0.24	-0.05	0.39	-0.02	-0.11	-0.23	-0.46	-0.28	-0.51	-0.27	-0.34	-0.24	-0.09	-0.25	-0.21	-0.31	-0.44	-0.25	-0.41	-0.25	-0.36	-0.34	-0.37	-0.23	-0.23
DURANTE_ADULT_OLFACTORY_NEUROEPITHELIUM_OLFACTORY_HORIZONTAL_BASAL_CELLS	0.42	0.38	0.83	1.97	0.48	2.88	-0.14	0.47	1.41	-0.22	1.43	0.33	1.29	0.04	2.55	1.17	1.9	-0.16	-0.21	-0.26	-0.01	-0.36	-0.27	-0.31	-0.41	-0.42	-0.37	-0.5	-0.35	-0.3	-0.51	-0.45	-0.67	-0.36	-0.47	-0.57	-0.42	-0.47	-0.5	-0.45	-0.54	-0.48	-0.38	-0.49	-0.46	-0.37	-0.57	-0.54	-0.49
BUSSLINGER_GASTRIC_NECK_CELLS	0.67	3.27	0.37	0.81	-0.13	2.87	-0.06	2.75	1.28	1.06	2.41	1.99	1.1	0.9	3.53	2.4	1.7	-0.31	-0.35	0.68	-0.03	-0.43	-0.35	0.56	-0.3	-0.29	-0.38	0.32	-0.25	-0.34	-0.38	-0.25	-0.41	-0.29	-0.47	-0.43	-0.4	-0.38	-0.34	-0.39	-0.41	-0.38	-0.42	-0.41	-0.43	-0.43	-0.37	-0.38	-0.33
DESCARTES_FETAL_ADRENAL_ERYTHROBLASTS	0.05	3.72	0.27	1.93	1.19	4.66	0.51	1.15	0.57	0.76	1.29	2.18	2.38	0.79	2.78	2.67	1.41	0	-0.17	0.12	0.03	-0.37	-0.46	-0.21	-0.2	0.54	-0.5	-0.47	0.09	-0.26	-0.4	-0.25	-0.13	-0.21	-0.25	-0.47	-0.26	-0.31	-0.24	-0.32	-0.39	-0.35	-0.24	-0.27	-0.32	-0.33	-0.22	-0.26	-0.2
DESCARTES_FETAL_INTESTINE_ERYTHROBLASTS	0.56	2.61	-0.14	0.32	0.27	2.49	0.09	0.43	1.16	0.01	2.27	1.19	2.8	0.35	3.35	2.08	1.43	0.06	-0.11	0.01	-0.12	-0.45	-0.54	-0.35	-0.33	0.09	-0.45	-0.13	-0.23	-0.32	-0.56	-0.32	-0.4	-0.3	-0.33	-0.5	-0.41	-0.38	-0.43	-0.29	-0.4	-0.37	-0.39	-0.36	-0.28	-0.4	-0.39	-0.3	-0.3
DESCARTES_FETAL_STOMACH_ERYTHROBLASTS	0.37	2.65	-0.19	0.42	0.05	2.55	0	0.29	1.62	0.07	0.79	1.08	1.84	0.21	2.55	2.12	1.41	-0.24	-0.35	-0.26	-0.06	-0.52	-0.61	-0.39	0.3	0.01	-0.41	-0.56	-0.1	-0.3	-0.54	-0.28	-0.34	-0.46	-0.32	-0.5	-0.42	-0.37	-0.45	-0.4	-0.45	-0.51	-0.37	-0.38	-0.39	-0.44	-0.42	-0.42	-0.46
HAY_BONE_MARROW_CD34_POS_PRE_B	1.64	0.98	0.36	0.45	0.66	3.24	0.03	0.57	0.2	0.45	0.23	2.38	1.27	0.3	2.21	1.47	1.15	-0.37	-0.34	0.02	0.06	-0.45	-0.68	-0.4	-0.16	-0.42	-0.52	-0.2	-0.35	-0.37	-0.53	-0.52	-0.5	-0.39	-0.5	-0.54	-0.48	-0.46	-0.55	-0.48	-0.56	-0.47	-0.48	-0.49	-0.53	-0.39	-0.48	-0.52	-0.44
DESCARTES_MAIN_FETAL_HEMATOPOIETIC_STEM_CELLS	-0.18	1.05	-0.39	-0.02	0.58	1.32	0.16	0.58	0.38	-0.12	0.22	0.15	1.09	0.02	2.43	0.98	-0.03	-0.27	-0.42	0.39	-0.39	-0.43	-0.14	-0.47	-0.37	-0.35	0.1	-0.31	-0.22	-0.32	-0.48	0.05	-0.46	-0.3	-0.53	-0.19	-0.22	-0.38	-0.4	-0.34	-0.42	-0.42	-0.32	-0.39	-0.34	-0.31	-0.39	-0.29	-0.16
GAO_STOMACH_24W_C1_PROCRPOS_MULTIPOTENT_PROGENITOR	-0.19	0.03	-0.14	-0.02	0.21	0.9	-0.19	0.12	-0.26	-0.61	0.15	0.65	1.14	-0.09	1.9	0.63	0.22	-0.35	-0.42	-0.26	-0.27	-0.39	-0.44	-0.2	-0.25	-0.14	-0.46	-0.75	-0.23	-0.22	-0.54	-0.39	-0.44	-0.4	-0.32	-0.29	-0.34	-0.24	-0.19	-0.37	-0.37	-0.32	-0.34	-0.37	-0.35	-0.38	-0.39	-0.48	-0.31
DESCARTES_FETAL_PANCREAS_LYMPHATIC_ENDOTHELIAL_CELLS	1.12	0.42	1.57	3.04	0.64	1.54	0.39	0.07	1.21	1.06	-0.16	1.22	1.3	1.24	2.04	1.77	0.02	-0.38	-0.18	-0.19	0.13	-0.51	-0.6	-0.35	-0.32	-0.09	-0.5	0.02	-0.3	-0.36	-0.52	-0.45	-0.46	-0.34	-0.31	-0.48	-0.4	-0.4	-0.36	-0.4	-0.46	-0.45	-0.41	-0.41	-0.41	-0.39	-0.42	-0.35	-0.44
DESCARTES_MAIN_FETAL_MICROGLIA	0.91	1.53	1.25	3.26	1.09	1.88	0.58	2.14	1.27	0.71	0.3	2.43	3.27	1	2.97	2.16	0.65	-0.22	-0.26	-0.33	1.44	-0.39	-0.45	-0.27	-0.32	-0.3	-0.25	0.02	-0.27	-0.4	-0.45	-0.43	-0.45	-0.43	-0.46	-0.45	-0.42	-0.28	-0.36	-0.42	-0.44	-0.47	-0.42	-0.39	-0.38	-0.34	-0.45	-0.4	-0.41
DURANTE_ADULT_OLFACTORY_NEUROEPITHELIUM_UNSPECIFIED	1.44	1.74	0.04	3.92	0.5	0.4	0.24	0.31	0.2	1.6	0.19	3.28	3.34	2.75	3.22	3.86	0.85	-0.34	-0.19	0.18	1.27	0.32	-0.38	0.1	-0.3	-0.26	-0.09	-0.41	-0.36	-0.29	-0.74	-0.52	-0.34	-0.41	-0.52	-0.49	-0.51	-0.45	-0.57	-0.46	-0.54	-0.51	-0.57	-0.48	-0.53	-0.56	-0.51	-0.54	-0.5
BUSSLINGER_GASTRIC_PREZYMOGENIC_CELLS	0.19	1.05	0.21	2.47	0.5	3.19	-0.21	0.98	0.98	2.18	1.06	3.31	3.46	0.61	0.74	2.16	1.65	-0.24	-0.28	0.4	-0.02	-0.47	-0.45	0.27	-0.19	-0.09	-0.34	-0.19	-0.01	-0.37	-0.37	-0.46	-0.38	-0.33	-0.42	-0.55	-0.4	-0.43	-0.35	-0.39	-0.5	-0.34	-0.44	-0.39	-0.43	-0.42	-0.47	-0.39	-0.32
DESCARTES_MAIN_FETAL_CLC_IL5RA_POSITIVE_CELLS	0.23	0.93	0.09	3.5	0.74	3.72	0.52	1.3	1.55	2.64	0.71	2.44	2.28	0.27	1.3	2.22	1.18	0.09	-0.07	-0.02	-0.23	-0.29	-0.28	-0.09	0.01	-0.02	-0.28	-0.04	-0.16	-0.22	-0.29	-0.2	-0.34	-0.27	-0.55	-0.24	-0.37	-0.19	-0.25	-0.38	-0.47	-0.19	-0.24	-0.34	-0.34	-0.46	-0.42	-0.52	-0.25
GAUTAM_EYE_CHOROID_SCLERA_ACTIVATED_T_CELLS	-0.16	0.75	0.1	1.41	-0.19	2.56	-0.11	0.8	0.33	2.08	0.87	1.92	1.15	0.64	1.1	0.86	1.26	-0.26	-0.12	-0.53	-0.03	-0.42	-0.98	-0.2	-0.16	-0.09	0.29	-0.34	-0.18	-0.27	-0.2	-0.31	-0.31	-0.24	-0.43	-0.35	-0.32	-0.32	-0.42	-0.29	-0.41	-0.39	-0.3	-0.36	-0.34	-0.38	-0.45	-0.41	-0.37
GAO_SMALL_INTESTINE_24W_C3_ENTEROCYTE_PROGENITOR_SUBTYPE_1	0.29	0.45	0.22	2.26	1.18	1.74	0.1	1.46	1.54	1.5	0.92	3.36	0.97	0.86	0.53	2.05	1.32	-0.09	-0.2	-0.23	0.91	-0.59	-0.17	-0.16	-0.29	0.07	-0.53	-0.37	-0.13	-0.3	-0.64	-0.53	-0.54	-0.34	-0.39	-0.57	-0.36	-0.34	-0.56	-0.37	-0.41	-0.35	-0.38	-0.37	-0.38	-0.5	-0.44	-0.37	-0.36
DESCARTES_FETAL_MUSCLE_SCHWANN_CELLS	0.81	0.61	1.51	4.03	1.59	3.97	-0.02	3.29	0.17	-0.14	0.92	2.46	2.13	0.89	0.31	2.9	1.78	-0.25	-0.43	0.37	-0.17	-0.25	-0.58	-0.29	-0.47	0.09	-0.42	-0.4	-0.42	-0.34	-0.43	-0.46	-0.59	-0.43	-0.33	-0.53	-0.43	-0.36	-0.42	-0.42	-0.44	-0.44	-0.4	-0.47	-0.44	-0.52	-0.43	-0.45	-0.41
ZHENG_CORD_BLOOD_C10_MULTILYMPHOID_PROGENITOR	0.17	1.81	1.67	5.97	0.73	3.62	0.43	6.43	1.17	2.41	2.57	4.26	4.53	1.26	3.08	3.29	0.66	-0.07	-0.36	0.57	-0.25	-0.13	0.04	-0.24	-0.19	0.16	-0.08	-0.15	-0.14	-0.3	-0.52	-0.36	-0.39	-0.31	-0.36	-0.51	-0.33	-0.3	-0.39	-0.4	-0.38	-0.31	-0.34	-0.38	-0.31	-0.42	-0.42	-0.23	-0.36
AIZARANI_LIVER_C22_RESIDENT_B_CELLS_2	1.37	1.69	-0.06	0.61	-0.14	-0.21	-0.1	0.42	2.21	2.04	0.24	1.21	1.12	0.15	1.33	0.06	0.72	-0.16	-0.11	-0.13	-0.13	-0.36	-0.49	-0.12	-0.28	-0.16	-0.27	-0.24	-0.26	-0.27	-0.29	-0.44	-0.32	-0.43	-0.43	-0.42	-0.41	-0.36	-0.4	-0.31	-0.43	-0.42	-0.41	-0.39	-0.41	-0.35	-0.4	-0.41	-0.37
BUSSLINGER_GASTRIC_LYZ_POSITIVE_CELLS	0.35	2.36	0.38	1.38	0.23	2.03	-0.16	2.61	3.32	2.02	1.31	1.98	3.49	2.17	3.3	1.82	1.87	-0.44	-0.35	-0.04	-0.17	-0.51	-0.72	-0.01	-0.42	-0.29	-0.4	-0.45	-0.13	-0.34	-0.25	-0.5	-0.49	-0.25	-0.59	-0.54	-0.43	-0.55	-0.49	-0.56	-0.59	-0.54	-0.49	-0.46	-0.47	-0.54	-0.56	-0.49	-0.54
DESCARTES_FETAL_EYE_VASCULAR_ENDOTHELIAL_CELLS	0.48	2.22	0.37	0.03	-0.09	0.54	0.15	1.31	2.61	1.92	0.65	2.27	2.35	2.19	1.36	1.32	0.86	-0.31	-0.35	-0.33	0.65	-0.51	-0.39	-0.38	-0.07	0.67	-0.42	-0.41	-0.31	-0.42	-0.39	-0.41	-0.41	-0.44	-0.5	-0.44	-0.43	-0.45	-0.43	-0.43	-0.47	-0.45	-0.42	-0.43	-0.45	-0.48	-0.46	-0.42	-0.45
DESCARTES_MAIN_FETAL_ELF3_AGBL2_POSITIVE_CELLS	0.12	0.67	0.03	0.41	0.58	1.13	0.14	0.77	0.38	2.26	0.25	1.02	1.99	1.41	1.11	0.43	0.38	-0.27	-0.2	-0.08	-0.08	-0.38	-0.6	-0.28	-0.3	-0.13	-0.36	-0.42	-0.1	-0.3	-0.44	-0.61	-0.45	-0.48	-0.48	-0.45	-0.38	-0.45	-0.45	-0.47	-0.47	-0.42	-0.47	-0.45	-0.52	-0.45	-0.43	-0.39	-0.41
DESCARTES_FETAL_HEART_ENDOCARDIAL_CELLS	1.96	3.12	-0.29	0.2	0.06	-0.05	-0.13	0.12	2.02	0.05	1.5	1.16	4.49	1.2	3.39	1.28	0.78	-0.04	-0.07	-0.7	-0.08	-0.45	-0.71	-0.33	-0.34	-0.35	-0.67	-0.5	-0.51	-0.36	-0.41	-0.54	-0.4	-0.37	-0.28	-0.47	-0.44	-0.23	-0.38	-0.36	-0.43	-0.47	-0.46	-0.47	-0.41	-0.31	-0.46	-0.44	-0.47
DESCARTES_FETAL_LIVER_VASCULAR_ENDOTHELIAL_CELLS	2.05	2.2	0.77	1.41	-0.06	0.07	-0.32	0.44	1.87	1.04	1.8	2.41	4.89	2.13	2.97	1.34	-0.15	-0.18	-0.23	-0.3	-0.16	-0.47	-0.13	-0.36	0.06	0.26	-0.18	-0.43	-0.41	-0.41	-0.5	-0.47	-0.44	-0.42	-0.49	-0.5	-0.46	-0.51	-0.5	-0.49	-0.49	-0.49	-0.45	-0.51	-0.47	-0.49	-0.52	-0.48	-0.48
DESCARTES_MAIN_FETAL_SKELETAL_MUSCLE_CELLS	3.24	0.47	0.24	0.53	0.38	0.49	0.4	0.58	2.47	2.59	1.64	3.43	6.35	1.52	5.33	4.82	2.72	-0.28	-0.2	0.74	0.03	-0.3	1.74	-0.24	-0.1	0.41	0.07	-0.33	-0.2	-0.32	-0.61	-0.27	-0.18	-0.43	-0.44	-0.42	-0.43	-0.34	-0.48	-0.41	-0.48	-0.41	-0.51	-0.38	-0.46	-0.49	-0.43	-0.27	-0.49
FAN_EMBRYONIC_CTX_MICROGLIA_3	0.54	1.34	0.38	-0.29	-0.17	-0.28	-0.19	0.16	1.22	1.14	-0.22	1.15	3.65	0.07	3.09	2.88	0.44	-0.29	-0.28	-0.34	-0.16	-0.28	-0.39	-0.24	-0.14	-0.38	-0.25	-0.12	-0.25	-0.32	-0.32	-0.43	-0.34	-0.25	-0.29	-0.32	-0.31	-0.32	-0.3	-0.29	-0.29	-0.25	-0.3	-0.31	-0.32	-0.32	-0.32	-0.28	-0.32
TRAVAGLINI_LUNG_MYELOID_DENDRITIC_TYPE_1_CELL	0.24	1.71	-0.2	-0.27	0.01	0.47	-0.28	0.27	-0.19	0.44	0.4	0.53	3.5	0.13	3.06	2.12	0.29	-0.29	-0.31	-0.18	-0.34	-0.43	-0.43	-0.36	-0.12	-0.15	-0.38	-0.25	-0.29	-0.33	-0.34	-0.32	-0.46	-0.41	-0.4	-0.41	-0.47	-0.38	-0.4	-0.39	-0.48	-0.46	-0.4	-0.44	-0.44	-0.46	-0.4	-0.47	-0.34
DESCARTES_MAIN_FETAL_BRONCHIOLAR_AND_ALVEOLAR_EPITHELIAL_CELLS	0.47	0.53	0.28	3.21	0.85	1.37	0.01	0.22	0.76	1.38	0.68	0.69	5.43	0.17	3.73	2.38	1.06	0.01	-0.4	-0.3	0.93	-0.54	-0.24	-0.13	-0.29	0.11	-0.51	0	-0.26	-0.36	-0.5	-0.49	-0.33	-0.41	-0.42	-0.42	-0.38	-0.43	-0.46	-0.37	-0.47	-0.41	-0.4	-0.41	-0.42	-0.45	-0.33	-0.38	-0.41
DESCARTES_FETAL_LIVER_MEGAKARYOCYTES	-0.03	-0.12	0.25	2.29	0.58	1.93	-0.09	1.23	1.62	1.43	2.28	0.55	5.32	1.49	3.57	5.19	0.49	-0.11	-0.32	-0.33	0.05	-0.37	-0.23	-0.37	-0.19	0.02	-0.17	-0.46	-0.13	-0.35	-0.42	-0.34	-0.27	-0.29	-0.16	-0.29	-0.29	-0.32	-0.23	-0.33	-0.38	-0.27	-0.34	-0.29	-0.29	-0.21	-0.35	-0.27	-0.24
DESCARTES_FETAL_LUNG_MEGAKARYOCYTES	0.78	0.54	0.42	1.4	0.5	1.78	-0.22	0.35	0.46	1.47	1.17	0.45	5.01	2.29	2.04	3.91	-0.04	-0.43	-0.41	-0.47	-0.19	-0.54	-0.37	-0.33	-0.43	-0.19	-0.34	-0.27	-0.29	-0.43	-0.5	-0.43	-0.32	-0.42	-0.32	-0.49	-0.4	-0.46	-0.41	-0.44	-0.47	-0.42	-0.42	-0.43	-0.46	-0.43	-0.51	-0.42	-0.43
DESCARTES_FETAL_SPLEEN_MEGAKARYOCYTES	1.32	0.3	0.72	1.91	0.84	1.99	0.28	1.65	1.24	0.06	0.86	0.57	4.5	0.63	2.82	4.84	1.36	-0.15	-0.38	-0.36	0.12	-0.35	-0.29	-0.35	-0.12	-0.02	-0.44	-0.17	-0.25	-0.32	-0.41	-0.39	-0.39	-0.32	-0.4	-0.27	-0.46	-0.36	-0.31	-0.3	-0.37	-0.39	-0.41	-0.41	-0.37	-0.32	-0.43	-0.38	-0.36
TRAVAGLINI_LUNG_CLUB_CELL	1.37	1.25	0.13	1.3	0.07	1.97	-0.33	0.34	-0.25	0.45	0.93	0.81	3.26	0.41	2.06	3.34	1.43	-0.31	-0.34	-0.14	-0.13	-0.51	-0.59	-0.38	-0.39	-0.13	-0.31	-0.32	-0.46	-0.42	-0.39	-0.53	-0.49	-0.33	-0.57	-0.59	-0.55	-0.51	-0.58	-0.5	-0.6	-0.58	-0.58	-0.54	-0.49	-0.59	-0.58	-0.52	-0.55
TRAVAGLINI_LUNG_SIGNALING_ALVEOLAR_EPITHELIAL_TYPE_2_CELL	1.39	1.36	0.32	1.23	0.88	3.27	-0.06	0.75	0.45	1.02	0.23	1.07	3.72	0.14	5.63	4.52	2.16	-0.3	-0.27	-0.26	-0.18	-0.46	-0.4	-0.35	-0.33	-0.27	-0.3	-0.27	-0.37	-0.38	-0.45	-0.49	-0.4	-0.53	-0.56	-0.44	-0.48	-0.43	-0.47	-0.34	-0.51	-0.5	-0.5	-0.47	-0.48	-0.55	-0.46	-0.47	-0.41
AIZARANI_LIVER_C5_NK_NKT_CELLS_3	2.25	2.14	2.3	1.02	0.13	0.98	-0.23	1.39	0.45	0.4	1.17	1.61	2.21	0.39	1.22	1.82	0.69	-0.24	-0.23	0.34	1.63	-0.54	-0.24	-0.29	-0.35	-0.04	-0.34	-0.32	-0.42	-0.35	-0.35	-0.46	-0.45	-0.47	-0.38	-0.44	-0.48	-0.31	-0.42	-0.4	-0.42	-0.4	-0.49	-0.44	-0.39	-0.35	-0.39	-0.43	-0.35
DESCARTES_FETAL_LIVER_LYMPHOID_CELLS	1.59	1.98	2.51	0.19	-0.01	0.54	-0.4	0.91	-0.1	-0.03	-0.14	0.68	1.95	-0.24	1.14	0.37	1.05	-0.48	-0.45	0.58	-0.22	-0.41	-0.23	-0.42	-0.17	0.04	-0.18	-0.29	-0.5	-0.33	-0.38	-0.52	-0.43	-0.35	-0.53	-0.4	-0.46	-0.42	-0.41	-0.43	-0.52	-0.44	-0.46	-0.37	-0.47	-0.43	-0.34	-0.45	-0.5
DESCARTES_MAIN_FETAL_MYELOID_CELLS	2.4	2.25	0.78	-0.11	-0.07	0.2	-0.2	0.03	-0.07	0.6	1.55	0.78	2.69	0.27	0.19	0.86	0.13	0.2	-0.04	0.07	-0.38	-0.32	-0.45	-0.28	-0.28	-0.23	-0.37	-0.29	-0.28	-0.38	-0.49	-0.36	-0.32	-0.32	-0.35	-0.34	-0.4	-0.38	-0.35	-0.38	-0.41	-0.33	-0.36	-0.34	-0.36	-0.39	-0.4	-0.37	-0.37
DESCARTES_FETAL_PANCREAS_MESOTHELIAL_CELLS	1.08	2.31	0.79	-0.3	-0.16	0.53	-0.12	0.4	-0.22	1.29	1.94	1.29	3.31	0.72	0.99	1.32	0.01	0.29	0.19	-0.19	-0.41	-0.44	-0.58	-0.36	-0.55	-0.46	-0.5	-0.35	-0.39	-0.37	-0.53	-0.48	-0.47	-0.42	-0.48	-0.45	-0.42	-0.46	-0.35	-0.39	-0.41	-0.39	-0.47	-0.43	-0.45	-0.42	-0.45	-0.39	-0.41
DURANTE_ADULT_OLFACTORY_NEUROEPITHELIUM_DENDRITIC_CELLS	1.78	2.46	1.36	0.4	0.24	1.03	-0.26	0.88	1.09	1.77	3.25	2.87	4.63	1	1.82	1.61	0.51	0.2	-0.06	-0.56	-0.03	-0.55	-0.44	-0.3	-0.36	-0.06	-0.26	-0.38	-0.29	-0.37	-0.44	-0.32	-0.53	-0.42	-0.42	-0.42	-0.54	-0.31	-0.44	-0.51	-0.47	-0.46	-0.5	-0.41	-0.43	-0.45	-0.38	-0.39	-0.36
FAN_EMBRYONIC_CTX_BRAIN_EFFECTOR_T_CELL	1.99	2.19	1.85	0	-0.07	0.56	-0.14	1.02	0	1.73	2.59	0.63	4.64	0.34	1.47	2.13	0.66	-0.03	-0.24	-0.41	-0.2	-0.42	-0.54	-0.02	-0.39	0.03	-0.47	-0.39	-0.26	-0.36	-0.43	-0.44	-0.49	-0.5	-0.35	-0.47	-0.55	-0.37	-0.47	-0.42	-0.44	-0.43	-0.48	-0.44	-0.43	-0.39	-0.37	-0.46	-0.38
CUI_DEVELOPING_HEART_C9_B_T_CELL	2.23	2.36	1.21	2.29	0.1	1.07	-0.17	1.06	0.98	1.44	3.17	2.78	3.86	0.82	1.38	2.36	1.15	0.2	-0.02	0.03	0.03	-0.38	-0.53	-0.35	-0.31	-0.14	-0.4	-0.56	-0.32	-0.32	-0.36	-0.39	-0.45	-0.5	-0.42	-0.55	-0.61	-0.27	-0.4	-0.45	-0.43	-0.39	-0.39	-0.42	-0.43	-0.41	-0.29	-0.41	-0.42
DURANTE_ADULT_OLFACTORY_NEUROEPITHELIUM_NK_CELLS	2.5	2.43	0.66	2.46	0.07	0.23	-0.23	0.35	0.02	1.93	4.01	3.01	3.99	0.25	1.96	1.27	0.15	0.08	-0.13	-0.15	0.1	-0.37	-0.4	-0.39	-0.4	-0.16	-0.43	-0.45	-0.35	-0.39	-0.45	-0.39	-0.51	-0.48	-0.39	-0.43	-0.54	-0.39	-0.49	-0.46	-0.47	-0.44	-0.5	-0.43	-0.42	-0.42	-0.36	-0.42	-0.38
TRAVAGLINI_LUNG_IGSF21_DENDRITIC_CELL	1.69	2.51	1.14	1.54	0.12	0.98	-0.11	0.66	0.77	1.01	2.61	0.74	3.14	-0.04	0.3	0.88	0.98	-0.25	-0.3	0.43	-0.47	-0.43	-0.52	-0.27	-0.47	-0.42	-0.48	-0.53	-0.42	-0.42	-0.48	-0.39	-0.5	-0.42	-0.43	-0.4	-0.43	-0.37	-0.39	-0.36	-0.43	-0.43	-0.44	-0.37	-0.46	-0.46	-0.47	-0.38	-0.42
DURANTE_ADULT_OLFACTORY_NEUROEPITHELIUM_MACROPHAGES	1.91	2.2	0.76	0.87	-0.15	0.26	-0.12	0.1	-0.06	1.29	1.77	1.47	1.68	0.53	2.21	1.22	0.94	0.06	-0.16	-0.36	-0.01	-0.57	-0.26	-0.44	-0.01	-0.03	-0.4	-0.48	-0.13	-0.4	-0.56	-0.38	-0.54	-0.49	-0.45	-0.58	-0.56	-0.46	-0.45	-0.49	-0.53	-0.5	-0.52	-0.5	-0.51	-0.57	-0.5	-0.51	-0.4
DESCARTES_FETAL_INTESTINE_VASCULAR_ENDOTHELIAL_CELLS	3.04	2.31	1.2	2.44	-0.04	0.85	-0.26	0.86	1.52	-0.17	0.31	0.86	2.45	0.56	0.56	0.83	1.17	-0.41	-0.51	0	-0.01	-0.34	-0.18	-0.38	-0.06	0.68	-0.48	-0.3	-0.4	-0.39	-0.45	-0.51	-0.39	-0.42	-0.48	-0.34	-0.51	-0.34	-0.44	-0.33	-0.48	-0.48	-0.42	-0.4	-0.43	-0.42	-0.46	-0.46	-0.3
DESCARTES_FETAL_MUSCLE_VASCULAR_ENDOTHELIAL_CELLS	2.61	2.28	2.17	1.24	0.12	0.23	-0.2	1.82	1.13	0.72	0.03	0.2	2.27	0.58	0.31	1.07	1.93	-0.17	-0.27	0.37	0.14	-0.44	-0.03	-0.34	-0.19	0.01	-0.4	-0.52	-0.38	-0.41	-0.39	-0.48	-0.39	-0.41	-0.26	-0.36	-0.41	-0.42	-0.42	-0.3	-0.46	-0.42	-0.43	-0.41	-0.44	-0.38	-0.44	-0.4	-0.37
DESCARTES_FETAL_THYMUS_ANTIGEN_PRESENTING_CELLS	2.42	2.45	1.43	3.33	0.06	0.49	-0.07	0.29	1.62	0.76	2.22	1.6	3.96	1.55	1.55	0.94	2.62	0.49	-0.01	-0.23	0.04	-0.15	0.03	-0.27	-0.28	-0.09	-0.18	-0.35	-0.16	-0.34	-0.32	-0.32	-0.36	-0.33	-0.35	-0.39	-0.24	-0.35	-0.39	-0.27	-0.46	-0.33	-0.36	-0.34	-0.38	-0.35	-0.39	-0.34	-0.27
DESCARTES_FETAL_LIVER_STELLATE_CELLS	2.37	2.9	1.08	0.63	0.61	1.7	0.07	1.06	1.03	0.79	0.01	0.43	1.91	0.37	0.47	0.63	0.75	-0.32	-0.39	1.24	0.32	-0.45	-0.48	-0.38	-0.29	0	-0.57	-0.45	-0.39	-0.44	-0.49	-0.41	-0.43	-0.48	-0.46	-0.45	-0.47	-0.43	-0.47	-0.44	-0.47	-0.46	-0.46	-0.45	-0.46	-0.46	-0.43	-0.48	-0.5
DESCARTES_FETAL_PANCREAS_DUCTAL_CELLS	2.12	2.16	0.19	0.63	0.02	1.68	-0.08	0.49	0.95	0.35	0.31	0.09	0.99	0.54	0.55	0.61	0.91	-0.25	-0.2	0.26	-0.19	-0.45	-0.48	-0.31	-0.45	-0.29	-0.42	-0.37	-0.36	-0.42	-0.46	-0.39	-0.42	-0.42	-0.41	-0.4	-0.37	-0.44	-0.37	-0.46	-0.45	-0.48	-0.43	-0.43	-0.44	-0.46	-0.45	-0.35	-0.4
DESCARTES_FETAL_EYE_MICROGLIA	2.86	2.91	1	1.65	0.64	1.41	0.49	1.14	0.76	0.95	0.48	1.5	2.99	0.64	0.98	0.96	0.38	-0.03	-0.1	-0.26	0.56	-0.23	-0.31	-0.28	-0.24	0.01	0.03	0.07	-0.14	-0.29	-0.38	-0.33	-0.36	-0.37	-0.44	-0.37	-0.17	-0.23	-0.26	-0.26	-0.4	-0.28	-0.36	-0.3	-0.37	-0.34	-0.37	-0.35	-0.29
DESCARTES_MAIN_FETAL_ENDOCARDIAL_CELLS	1.52	2.49	0.03	1.19	0.8	0.83	0.25	0.58	1.36	1.16	0.29	1.19	3.45	0.92	0.81	0.81	0.99	-0.22	-0.27	-0.54	0.11	-0.38	-0.37	-0.28	-0.13	-0.18	-0.44	-0.52	-0.34	-0.38	-0.48	-0.34	-0.39	-0.48	-0.43	-0.47	-0.39	-0.4	-0.45	-0.46	-0.45	-0.4	-0.43	-0.45	-0.47	-0.45	-0.47	-0.37	-0.45
CUI_DEVELOPING_HEART_C3_FIBROBLAST_LIKE_CELL	2.4	3.36	-0.16	1.66	1	1.87	0.21	2.35	2.24	1.03	1.29	1.46	2.87	0.51	1.73	1.62	2.1	-0.28	-0.38	-0.25	-0.27	-0.35	-0.38	0.31	-0.34	-0.25	-0.43	-0.29	-0.37	-0.38	-0.39	-0.42	-0.43	-0.43	-0.39	-0.41	-0.39	-0.41	-0.4	-0.39	-0.4	-0.39	-0.41	-0.39	-0.4	-0.39	-0.41	-0.37	-0.41
FAN_OVARY_CL5_HEALTHY_SELECTABLE_FOLLICLE_THECAL_CELL	2.34	3.24	-0.17	0.78	0.9	1.96	0	1.39	2.4	0.87	1.43	1.76	2.68	0.69	1.67	1.96	1.73	-0.15	-0.26	0.16	-0.17	-0.46	-0.52	-0.29	-0.37	-0.43	-0.5	-0.43	-0.32	-0.34	-0.39	-0.46	-0.46	-0.4	-0.41	-0.46	-0.47	-0.38	-0.36	-0.44	-0.44	-0.39	-0.45	-0.42	-0.42	-0.44	-0.46	-0.42	-0.36
LAKE_ADULT_KIDNEY_C5_PROXIMAL_TUBULE_EPITHELIAL_CELLS_STRESS_INFLAM	1.88	2.9	0.53	0.8	0.29	2.52	0.03	1.16	1.35	0.79	1.19	1.38	2.27	0.35	1.29	1.01	0.69	-0.21	-0.17	-0.26	-0.12	-0.44	-0.44	-0.24	-0.42	-0.28	-0.31	-0.51	-0.26	-0.4	-0.43	-0.44	-0.44	-0.4	-0.4	-0.41	-0.43	-0.41	-0.36	-0.42	-0.45	-0.39	-0.4	-0.41	-0.41	-0.37	-0.43	-0.41	-0.37
GAO_LARGE_INTESTINE_24W_C1_DCLK1POS_PROGENITOR	1.64	2.49	-0.14	0.9	0.84	2.15	-0.16	0.76	0.87	1.43	0.97	1.69	2.93	0.21	1.82	1.67	1.88	-0.3	-0.37	-0.42	0.11	-0.47	-0.47	0.86	-0.35	-0.26	-0.27	-0.43	-0.4	-0.41	-0.37	-0.38	-0.48	-0.39	-0.46	-0.52	-0.4	-0.49	-0.45	-0.42	-0.44	-0.43	-0.46	-0.48	-0.47	-0.46	-0.47	-0.44	-0.43
DESCARTES_FETAL_ADRENAL_VASCULAR_ENDOTHELIAL_CELLS	2.49	3.68	2.61	0.86	0.05	1.45	0.14	0.96	1.89	0.91	1.95	2.12	4.36	1.76	3.35	2.28	1.95	-0.01	-0.31	-0.17	-0.1	-0.46	-0.35	-0.17	0.08	0.43	-0.41	-0.42	-0.36	-0.35	-0.5	-0.42	-0.4	-0.42	-0.36	-0.47	-0.38	-0.4	-0.39	-0.37	-0.44	-0.39	-0.4	-0.41	-0.44	-0.44	-0.48	-0.37	-0.33
TRAVAGLINI_LUNG_BRONCHIAL_VESSEL_2_CELL	2.83	2.96	0.66	1.13	0.36	1.04	-0.19	0.68	2.56	1.47	1.68	2.02	3.71	0.64	1.88	1.75	1.07	-0.07	-0.23	-0.18	-0.03	-0.51	-0.57	-0.3	-0.27	0.14	-0.38	-0.47	-0.33	-0.37	-0.41	-0.47	-0.49	-0.38	-0.37	-0.42	-0.48	-0.39	-0.33	-0.36	-0.43	-0.35	-0.37	-0.35	-0.37	-0.39	-0.38	-0.36	-0.23
TRAVAGLINI_LUNG_ARTERY_CELL	2.73	3.05	0.36	1.09	0.14	1.44	-0.14	0.32	0.21	0.18	1	1.77	3.83	1	2.16	1.55	1.14	-0.29	-0.26	-0.06	0.59	-0.05	-0.77	-0.11	-0.35	-0.12	-0.2	-0.16	-0.39	-0.35	-0.42	-0.45	-0.43	-0.24	-0.42	-0.41	-0.47	-0.3	-0.37	-0.42	-0.44	-0.37	-0.45	-0.41	-0.42	-0.43	-0.37	-0.37	-0.37
ZHONG_PFC_MAJOR_TYPES_OPC	1.8	2.75	0.66	0.97	0.76	2.03	-0.07	0.77	0.31	0.81	1.23	1.82	3.42	1.23	1	1.61	1.12	-0.45	-0.42	-0.44	-0.31	-0.49	-0.15	-0.23	-0.32	0.03	-0.36	-0.12	-0.46	-0.4	-0.46	-0.4	-0.43	-0.46	-0.45	-0.42	-0.41	-0.48	-0.47	-0.46	-0.44	-0.43	-0.5	-0.45	-0.45	-0.48	-0.44	-0.46	-0.44
GOBP_ENDODERMAL_CELL_DIFFERENTIATION	2.9	3.07	1.34	0.45	0.09	1.72	-0.31	-0.12	0.44	0.45	1.48	0.11	3.24	0.04	1.5	0.63	1.72	-0.26	-0.3	-0.13	-0.2	-0.46	-0.27	-0.32	-0.37	-0.12	-0.34	-0.47	-0.42	-0.38	-0.47	-0.45	-0.42	-0.42	-0.39	-0.38	-0.44	-0.44	-0.43	-0.43	-0.45	-0.46	-0.45	-0.45	-0.45	-0.44	-0.42	-0.45	-0.46
GOBP_ENDODERM_DEVELOPMENT	2.91	3.27	0.96	0.5	0.52	1.54	-0.21	0.21	0.58	0.35	1.83	0.52	3.17	0.23	1.32	0.91	1.95	-0.17	-0.25	-0.14	-0.22	-0.45	-0.31	-0.35	-0.22	0.13	-0.37	-0.41	-0.38	-0.34	-0.48	-0.44	-0.4	-0.42	-0.42	-0.41	-0.42	-0.45	-0.44	-0.44	-0.46	-0.45	-0.41	-0.45	-0.43	-0.42	-0.4	-0.41	-0.41
GOBP_ENDODERM_FORMATION	3.04	3.02	1.3	0.63	0.64	1.66	-0.22	0.1	0.29	0.29	1.97	0.47	3.64	0.07	1.44	1.06	2.15	-0.17	-0.26	-0.15	-0.14	-0.44	-0.3	-0.31	-0.3	0.05	-0.37	-0.46	-0.41	-0.37	-0.47	-0.44	-0.42	-0.39	-0.39	-0.4	-0.44	-0.45	-0.4	-0.44	-0.45	-0.45	-0.43	-0.45	-0.45	-0.43	-0.41	-0.43	-0.42
TRAVAGLINI_LUNG_PERICYTE_CELL	2.73	2.98	0.59	1.38	0.41	1.11	0.01	1.53	0.85	0.53	1.57	0.83	3.21	0.15	1.52	0.73	1.79	-0.16	-0.29	-0.05	-0.23	-0.46	-0.27	-0.49	-0.16	0.42	-0.49	-0.54	-0.42	-0.43	-0.51	-0.47	-0.53	-0.45	-0.48	-0.49	-0.56	-0.5	-0.5	-0.47	-0.5	-0.55	-0.53	-0.48	-0.5	-0.52	-0.47	-0.44	-0.46
WP_ENDODERM_DIFFERENTIATION	1.92	2.4	1.12	1.34	0.36	0.94	0.05	0.27	-0.03	0.48	0.9	0.69	1.75	0.38	0.82	0.91	1.58	-0.31	-0.45	-0.3	0.14	-0.5	-0.49	-0.52	-0.3	-0.1	-0.55	-0.36	-0.36	-0.37	-0.49	-0.51	-0.46	-0.45	-0.48	-0.51	-0.45	-0.46	-0.51	-0.48	-0.52	-0.46	-0.48	-0.51	-0.48	-0.5	-0.52	-0.52	-0.46
DESCARTES_FETAL_KIDNEY_METANEPHRIC_CELLS	0.42	2.55	1.76	1.11	1.84	2.96	0.86	0.73	0.7	-0.6	0.66	1.73	3.59	-0.12	0.51	0.26	1.79	-0.32	-0.32	-0.21	-0.56	-0.49	0.17	-0.25	-0.44	-0.48	-0.37	-0.33	-0.46	-0.35	-0.49	-0.47	-0.41	-0.41	-0.38	-0.23	-0.47	-0.33	-0.45	-0.47	-0.45	-0.4	-0.35	-0.44	-0.39	-0.47	-0.42	-0.43	-0.39
GAUTAM_EYE_IRIS_CILIARY_BODY_SMOOTH_MUSCLE_CELLS	1.13	2.38	0.3	1.75	1.51	2.72	0.34	1.75	0.42	0.58	0.7	2.49	4.33	1.55	1.05	0.65	0.52	-0.23	-0.26	0.43	-0.12	-0.65	-0.58	-0.39	-0.36	-0.21	-0.4	-0.4	-0.29	-0.35	-0.52	-0.55	-0.48	-0.47	-0.42	-0.58	-0.48	-0.49	-0.46	-0.53	-0.49	-0.49	-0.52	-0.5	-0.5	-0.54	-0.54	-0.52	-0.48
DESCARTES_MAIN_FETAL_SYNCYTIOTROPHOBLASTS_AND_VILLOUS_CYTOTROPHOBLASTS	1.09	2.01	0.12	1.64	1.92	3.58	0.39	2.27	0.21	0.55	1.04	0.8	4.8	0.36	0.53	0.6	4.32	-0.32	-0.25	0.85	-0.15	-0.42	-0.52	-0.36	0.02	0.03	-0.32	-0.54	-0.37	-0.23	-0.44	-0.4	-0.48	-0.27	-0.41	-0.35	-0.44	-0.31	-0.33	-0.36	-0.4	-0.43	-0.35	-0.35	-0.36	-0.26	-0.36	-0.37	-0.41
DESCARTES_FETAL_LUNG_MYELOID_CELLS	0.32	2.22	-0.2	0.64	-0.08	0.43	-0.16	0.22	1.72	1.12	0.96	2.5	4.97	2.4	0.89	2.26	3.93	0.2	-0.23	-0.23	-0.05	-0.28	-0.41	-0.22	-0.1	-0.53	-0.45	0.9	-0.25	-0.24	-0.32	-0.04	-0.27	-0.34	-0.36	-0.28	-0.09	-0.02	-0.28	-0.13	-0.47	-0.1	-0.3	-0.27	-0.26	-0.27	-0.39	-0.37	-0.22
DESCARTES_FETAL_HEART_EPICARDIAL_FAT_CELLS	0.88	2.36	0.01	0.25	0.31	1.21	-0.11	0.76	0.1	1.01	2.35	0.56	3.11	0.32	2.17	1.56	1.94	0.49	0.3	-0.05	-0.14	-0.44	-0.36	-0.39	-0.36	-0.27	-0.64	-0.13	-0.32	-0.39	-0.54	-0.42	-0.46	-0.34	-0.42	-0.4	-0.35	-0.4	-0.41	-0.39	-0.36	-0.35	-0.48	-0.41	-0.46	-0.45	-0.44	-0.33	-0.48
BUSSLINGER_GASTRIC_CHIEF_CELLS	0.72	2.03	-0.24	1.26	0.2	1.74	-0.21	-0.17	0.2	0.05	0.8	1.37	2.59	0.18	0.87	1.28	1.93	-0.42	-0.36	-0.74	-0.11	-0.51	-0.29	-0.4	-0.2	-0.1	-0.3	-0.25	-0.47	-0.37	-0.49	-0.63	-0.48	-0.46	-0.57	-0.64	-0.57	-0.59	-0.61	-0.64	-0.65	-0.51	-0.66	-0.57	-0.58	-0.61	-0.58	-0.67	-0.57
DESCARTES_FETAL_INTESTINE_MYELOID_CELLS	0.69	1.13	0.03	1.19	0.49	1.47	-0.21	0.93	0.45	0.99	0.31	2.3	4.51	0.2	1.83	1.78	2.79	-0.04	-0.08	-0.39	0.11	-0.31	-0.24	-0.3	-0.33	-0.19	-0.57	-0.39	-0.32	-0.37	-0.38	-0.36	-0.44	-0.39	-0.47	-0.46	-0.27	-0.4	-0.41	-0.38	-0.47	-0.37	-0.41	-0.4	-0.42	-0.42	-0.47	-0.48	-0.37
DURANTE_ADULT_OLFACTORY_NEUROEPITHELIUM_RESPIRATORY_CILIATED_CELLS	1.02	2.61	0.04	2.62	0.2	1.92	-0.09	0.28	1.16	2.19	2.07	2.96	6.49	1.64	2.75	2.64	2.72	-0.08	-0.09	-0.53	0.95	0.2	0.06	-0.07	-0.42	0.1	-0.37	0.18	-0.29	-0.34	-0.52	-0.68	-0.47	-0.47	-0.51	-0.61	-0.49	-0.55	-0.53	-0.45	-0.51	-0.52	-0.56	-0.48	-0.51	-0.58	-0.56	-0.48	-0.51
HAY_BONE_MARROW_EARLY_ERYTHROBLAST	0.12	1.56	0.12	0.87	-0.11	0.94	-0.01	0.54	0.31	0.63	0.91	0.98	5.65	0.8	2.2	0.99	2.57	-0.06	0.03	-0.48	0.48	-0.48	-0.44	-0.09	-0.26	-0.06	-0.3	-0.36	-0.25	-0.27	-0.44	-0.49	-0.43	-0.23	-0.39	-0.32	-0.39	-0.3	-0.39	-0.39	-0.42	-0.33	-0.32	-0.35	-0.32	-0.44	-0.42	-0.34	-0.36
GAO_SMALL_INTESTINE_24W_C4_ENTEROCYTE_PROGENITOR_SUBTYPE_2	0.92	1.21	0.36	0.53	1.12	2.05	0.29	0.46	-0.02	1.43	0.8	1.11	4.08	1.11	2.87	0.95	2.79	0.07	-0.06	-0.46	-0.04	-0.36	-0.52	-0.2	-0.27	-0.07	-0.28	-0.37	-0.24	-0.35	-0.4	-0.39	-0.38	-0.36	-0.4	-0.35	-0.36	-0.39	-0.34	-0.32	-0.37	-0.39	-0.37	-0.37	-0.37	-0.38	-0.3	-0.41	-0.31
GAO_LARGE_INTESTINE_ADULT_CG_GOBLET_CELL_SUBTYPE_2	0.13	0.25	0.63	1.98	0.28	0.09	-0.03	0.09	0.7	-0.07	1.47	1.2	4.62	0.27	2.06	1.02	2.52	-0.15	-0.32	-0.21	0.06	-0.36	-0.42	0	0.09	0.23	-0.71	0.07	-0.15	-0.25	-0.53	-0.27	-0.24	-0.26	-0.19	-0.43	-0.18	-0.19	-0.38	-0.28	-0.37	-0.31	-0.36	-0.37	-0.37	-0.43	-0.33	-0.35	-0.28
CUI_DEVELOPING_HEART_TRABECULAR_VENTRICULAR_CARDIOMYOCYTE	1.76	1.69	0.45	0.04	0.45	1.37	-0.31	0.5	2.31	0.58	3.05	1.82	4.05	0.49	1.88	2.36	1.12	0.06	-0.32	-0.3	0.67	-0.55	-0.49	-0.27	-0.53	-0.27	-0.39	-0.5	-0.46	-0.44	-0.58	-0.51	-0.55	-0.54	-0.48	-0.51	-0.57	-0.48	-0.58	-0.49	-0.56	-0.52	-0.48	-0.51	-0.48	-0.57	-0.54	-0.51	-0.53
DESCARTES_FETAL_KIDNEY_URETERIC_BUD_CELLS	1.28	1.3	0.04	0.78	0.71	0.49	-0.26	-0.19	1.98	0.5	3.38	1.94	4.17	1.37	1.54	1.71	0.66	-0.04	-0.16	-0.39	-0.01	-0.48	-0.52	-0.48	-0.46	-0.41	-0.49	-0.45	-0.45	-0.48	-0.48	-0.45	-0.49	-0.47	-0.47	-0.5	-0.51	-0.48	-0.49	-0.49	-0.48	-0.47	-0.46	-0.5	-0.49	-0.49	-0.51	-0.49	-0.48
DESCARTES_MAIN_FETAL_PARIETAL_AND_CHIEF_CELLS	2.51	2.77	0.32	0.75	0.76	0.74	0.79	0.69	4.14	1.24	3.91	2.95	6.24	2.14	3.96	1.61	1.88	0.61	0	-0.01	0.79	0.48	-0.39	-0.26	-0.08	0.15	-0.14	-0.45	-0.27	-0.33	-0.52	-0.48	-0.31	-0.38	-0.46	-0.55	-0.42	-0.4	-0.47	-0.46	-0.49	-0.44	-0.47	-0.39	-0.4	-0.52	-0.44	-0.33	-0.42
BUSSLINGER_DUODENAL_MATURE_ENTEROCYTES	0.92	1.07	1.18	-0.3	0.11	1.27	-0.19	0.06	2.97	1.77	3.58	3.41	6.08	1.66	1.97	1.99	1.44	1.19	1.12	0.68	0.51	-0.41	-0.32	-0.4	-0.38	-0.18	-0.48	-0.48	-0.48	-0.41	-0.55	-0.52	-0.51	-0.42	-0.54	-0.52	-0.53	-0.52	-0.51	-0.54	-0.53	-0.5	-0.57	-0.55	-0.57	-0.57	-0.56	-0.55	-0.49
CUI_DEVELOPING_HEART_C6_EPICARDIAL_CELL	0.52	2.02	-0.05	-0.15	0	1.32	-0.27	0.28	2.59	1.4	3.3	2.79	4.38	0.87	1.31	2.07	0.91	0.89	0.72	0.49	0.52	-0.52	-0.55	-0.37	-0.49	-0.39	-0.57	-0.33	-0.48	-0.49	-0.58	-0.57	-0.52	-0.52	-0.51	-0.55	-0.53	-0.53	-0.51	-0.53	-0.54	-0.53	-0.55	-0.53	-0.54	-0.56	-0.58	-0.53	-0.56
CUI_DEVELOPING_HEART_C7_MAST_CELL	1.76	1.93	0.38	0.72	-0.08	1.05	-0.31	0.14	2.89	1.59	4.13	2.46	6.23	1.16	1.04	1.33	0.22	1.41	1.24	1.15	0.54	-0.51	-0.66	-0.38	-0.36	-0.18	-0.44	-0.47	-0.38	-0.44	-0.48	-0.45	-0.53	-0.39	-0.42	-0.42	-0.52	-0.31	-0.43	-0.44	-0.43	-0.38	-0.46	-0.44	-0.46	-0.49	-0.48	-0.44	-0.37
BUSSLINGER_ESOPHAGEAL_LATE_SUPRABASAL_CELLS	0.33	1.56	1.35	1.45	0.56	2.52	-0.23	0.31	2.53	1.27	5.41	4.03	6.05	1.97	2.51	3.04	0.47	0.84	0.25	0.93	-0.18	-0.55	-0.47	-0.32	-0.48	-0.38	-0.52	-0.36	-0.4	-0.43	-0.52	-0.48	-0.47	-0.46	-0.51	-0.48	-0.5	-0.47	-0.46	-0.52	-0.51	-0.48	-0.48	-0.47	-0.48	-0.52	-0.49	-0.48	-0.48
DESCARTES_FETAL_EYE_CORNEAL_AND_CONJUNCTIVAL_EPITHELIAL_CELLS	0.61	0.87	-0.17	0.74	-0.15	1.07	-0.13	-0.22	2.78	1.25	4.44	2.62	4.33	1.29	1.61	2.3	0.62	1.24	0.83	1.03	0.45	-0.48	-0.48	-0.42	-0.39	-0.31	-0.48	-0.37	-0.37	-0.42	-0.52	-0.47	-0.5	-0.45	-0.47	-0.49	-0.49	-0.47	-0.43	-0.47	-0.47	-0.48	-0.47	-0.47	-0.48	-0.5	-0.47	-0.47	-0.47
DURANTE_ADULT_OLFACTORY_NEUROEPITHELIUM_RESPIRATORY_COLUMNAR_CELLS	0.4	0.45	-0.2	-0.09	0.09	0.92	-0.23	0.02	2.26	0.68	4.15	2.81	4	1.24	1.98	1.48	1.02	1.1	0.55	1.2	0.1	-0.45	-0.46	-0.45	-0.49	-0.26	-0.48	-0.37	-0.43	-0.42	-0.51	-0.51	-0.46	-0.46	-0.49	-0.53	-0.53	-0.52	-0.49	-0.5	-0.48	-0.48	-0.52	-0.5	-0.51	-0.55	-0.49	-0.5	-0.5
DURANTE_ADULT_OLFACTORY_NEUROEPITHELIUM_RESPIRATORY_HORIZONTAL_BASAL_CELLS	0.2	0.52	1.15	-0.07	-0.15	1.21	-0.19	-0.07	3	0.83	4.72	3.16	4.43	1.11	1.35	1.02	0.82	1.16	0.71	1.25	0.02	-0.41	-0.43	-0.46	-0.44	-0.31	-0.46	-0.4	-0.42	-0.4	-0.52	-0.49	-0.49	-0.45	-0.44	-0.5	-0.5	-0.5	-0.47	-0.43	-0.45	-0.46	-0.5	-0.46	-0.48	-0.49	-0.46	-0.45	-0.44
FAN_EMBRYONIC_CTX_BRAIN_MYELOID	-0.06	0.84	0.46	0.89	0.34	2.17	-0.22	0.74	3.09	1.81	5.51	4.43	6.01	1.58	0.84	2.67	1.28	1.75	1.29	1.14	0.3	-0.53	-0.45	-0.35	-0.38	-0.23	-0.57	-0.36	-0.34	-0.38	-0.53	-0.45	-0.55	-0.4	-0.42	-0.53	-0.49	-0.41	-0.51	-0.52	-0.48	-0.43	-0.5	-0.5	-0.52	-0.52	-0.47	-0.5	-0.43
BUSSLINGER_DUODENAL_DIFFERENTIATING_STEM_CELLS	0.57	0.82	-0.05	0.41	0.58	2.02	-0.05	1.35	2.62	1.29	3.59	3.07	4.01	0.68	1.04	2.47	0.84	0	-0.28	0.34	0.13	-0.7	-0.6	-0.5	-0.23	-0.35	-0.37	-0.23	-0.22	-0.32	-0.32	-0.49	-0.42	-0.37	-0.36	-0.44	-0.42	-0.32	-0.4	-0.43	-0.44	-0.39	-0.38	-0.44	-0.42	-0.45	-0.44	-0.4	-0.32
BUSSLINGER_DUODENAL_TRANSIT_AMPLIFYING_CELLS	0.61	0.88	0.13	0.17	-0.15	0.8	-0.08	0.61	1.94	1.05	3.46	2.34	3.6	0.32	0.92	1.96	0.9	0.1	-0.22	0.69	0.29	-0.65	-0.8	-0.55	-0.31	-0.23	-0.3	-0.21	-0.31	-0.38	-0.36	-0.49	-0.51	-0.43	-0.39	-0.45	-0.47	-0.37	-0.52	-0.42	-0.47	-0.47	-0.43	-0.46	-0.42	-0.59	-0.51	-0.46	-0.41
ZHONG_PFC_C8_ORG_PROLIFERATING	0.31	0.44	-0.08	0.3	1.09	1.96	0.18	0.47	3.17	0.8	4.14	3.01	4.09	1.57	0.58	2.06	0.04	0.52	-0.13	-0.12	0.39	-0.55	-0.63	-0.53	-0.43	0.08	-0.41	-0.35	-0.1	-0.4	-0.38	-0.39	-0.44	-0.49	-0.38	-0.37	-0.47	-0.38	-0.52	-0.46	-0.41	-0.4	-0.45	-0.47	-0.51	-0.5	-0.43	-0.47	-0.47
DESCARTES_FETAL_ADRENAL_CSH1_CSH2_POSITIVE_CELLS	-0.07	1.84	1.5	-0.3	0.02	0.66	-0.23	-0.15	2.34	0.82	3.31	2.6	3.7	1.14	0.89	1.57	0.8	0.05	-0.17	-0.49	-0.33	-0.44	-0.55	-0.45	-0.38	-0.39	-0.39	-0.43	-0.4	-0.41	-0.49	-0.52	-0.45	-0.41	-0.46	-0.44	-0.48	-0.47	-0.42	-0.45	-0.47	-0.46	-0.47	-0.43	-0.45	-0.47	-0.47	-0.44	-0.47
HAY_BONE_MARROW_EOSINOPHIL	0.91	1.74	0.77	0.48	0.67	0.69	0.12	0.49	2.55	1.55	2.53	3.13	3.17	1.56	1.01	1.16	-0.02	0.04	-0.18	0.34	-0.27	-0.53	-0.47	-0.23	-0.49	-0.27	-0.1	-0.09	-0.26	-0.35	-0.3	-0.37	-0.37	-0.39	-0.51	-0.47	-0.48	-0.44	-0.41	-0.41	-0.45	-0.39	-0.49	-0.44	-0.43	-0.47	-0.52	-0.47	-0.45
CUI_DEVELOPING_HEART_C1_5TH_WEEK_CARDIAC_CELLS	0.94	1.45	0.15	0.69	-0.19	0.57	-0.23	0.14	4.18	0.99	3.38	3.18	3.67	1.02	2.44	2.11	1.69	0.04	-0.37	0.15	0.97	-0.23	-0.46	-0.36	-0.55	-0.33	-0.2	-0.31	-0.47	-0.42	-0.54	-0.58	-0.52	-0.61	-0.56	-0.52	-0.56	-0.51	-0.59	-0.5	-0.58	-0.5	-0.53	-0.54	-0.53	-0.56	-0.59	-0.51	-0.54
DURANTE_ADULT_OLFACTORY_NEUROEPITHELIUM_SUSTENTACULAR_CELLS	0.43	0.96	-0.49	1.99	0.18	-0.07	-0.26	0.13	3.35	1.22	3.79	3.4	4.12	0.01	2.56	2.11	1.58	-0.18	-0.37	-0.03	0.18	-0.48	-0.61	-0.34	-0.43	-0.32	-0.33	-0.26	-0.43	-0.39	-0.47	-0.42	-0.45	-0.4	-0.35	-0.43	-0.47	-0.42	-0.43	-0.44	-0.4	-0.43	-0.41	-0.43	-0.41	-0.41	-0.36	-0.42	-0.44
DURANTE_ADULT_OLFACTORY_NEUROEPITHELIUM_OLFACTORY_MICROVILLAR_CELLS	-0.11	0.11	-0.13	1.01	0.09	0.19	0.17	0.82	2.14	1.4	3.12	2.98	2.24	0.98	1.23	2.06	1.12	-0.05	-0.18	-0.26	-0.12	-0.43	-0.08	-0.31	-0.3	-0.29	-0.42	-0.3	-0.37	-0.37	-0.45	-0.41	-0.42	-0.31	-0.39	-0.44	-0.46	-0.41	-0.4	-0.38	-0.42	-0.42	-0.41	-0.41	-0.43	-0.45	-0.4	-0.41	-0.43
BUSSLINGER_DUODENAL_BCHE_CELLS	0.28	0.23	-0.17	1.89	0.78	1.46	-0.16	-0.28	1.75	1.62	3.92	2.63	4.03	1.66	1.19	2.85	0.15	1.72	1.62	0.05	0.4	-0.46	-0.46	-0.35	-0.47	-0.53	-0.85	-0.35	-0.54	-0.39	-0.54	-0.58	-0.54	-0.54	-0.55	-0.67	-0.52	-0.54	-0.53	-0.56	-0.58	-0.56	-0.58	-0.57	-0.57	-0.58	-0.63	-0.59	-0.56
FAN_OVARY_CL2_PUTATIVE_EARLY_ATRETIC_FOLLICLE_THECAL_CELL_1	-0.12	0.85	-0.18	2.12	0.31	0.7	-0.18	0.57	3.87	1.93	3.15	4	4.58	2.04	2.01	2.55	1.43	1.29	1.29	1.44	0.8	-0.6	-0.61	-0.4	-0.28	-0.3	-0.4	-0.55	-0.16	-0.3	-0.27	-0.42	-0.58	-0.37	-0.49	-0.54	-0.61	-0.42	-0.47	-0.57	-0.5	-0.44	-0.54	-0.5	-0.51	-0.58	-0.55	-0.48	-0.41
DESCARTES_FETAL_PLACENTA_PAEP_MECOM_POSITIVE_CELLS	-0.29	0.67	2.02	2.99	0.51	1.13	0.22	0.21	2.34	0.69	3.38	2.68	3.65	2.12	2.39	1.28	0.91	1.73	1.03	1.65	-0.25	-0.45	-0.58	-0.26	-0.38	-0.09	-0.39	-0.48	-0.17	-0.34	-0.4	-0.41	-0.38	-0.36	-0.32	-0.36	-0.4	-0.43	-0.43	-0.34	-0.4	-0.42	-0.35	-0.43	-0.4	-0.41	-0.38	-0.39	-0.41
DESCARTES_FETAL_KIDNEY_MYELOID_CELLS	0.86	0.63	1.13	0.69	0.19	1.23	0.22	1.3	1.72	1.48	3.39	3.2	5.92	0.55	1.41	2.1	-0.04	0.78	0.49	-0.23	-0.21	-0.31	-0.36	-0.2	-0.28	-0.01	0.05	-0.12	-0.25	-0.33	-0.34	-0.16	-0.44	-0.36	-0.43	-0.38	-0.29	-0.36	-0.28	-0.43	-0.46	-0.37	-0.38	-0.31	-0.32	-0.34	-0.38	-0.38	-0.27
GAO_ESOPHAGUS_25W_C2_KRT6BPOS_SECRETORY_PROGENITOR_CELLS	0.28	-0.05	0.35	2.81	-0.23	0.99	-0.02	1.5	1.13	3.49	4.6	5.9	9.36	0.97	4.32	4.95	-0.11	0.53	0.13	-0.07	0.5	-0.32	-0.33	-0.15	-0.32	-0.24	-0.3	-0.29	-0.2	-0.33	-0.27	-0.43	-0.34	-0.17	-0.14	-0.34	-0.26	-0.31	-0.27	-0.2	-0.32	-0.26	-0.29	-0.22	-0.36	-0.34	-0.21	-0.32	-0.13
GAUTAM_EYE_CORNEA_CONJUNCTIVAL_CELLS	0.01	0.72	0.58	0.5	0.37	2.06	0.04	0.39	1.28	1.85	3.04	3.79	4.37	0.81	3.38	2.52	0.98	-0.1	-0.22	-0.1	-0.31	-0.48	-0.56	-0.36	-0.34	-0.35	-0.3	-0.32	-0.33	-0.39	-0.43	-0.45	-0.44	-0.43	-0.41	-0.44	-0.45	-0.46	-0.44	-0.44	-0.47	-0.47	-0.44	-0.42	-0.41	-0.49	-0.46	-0.45	-0.5
RUBENSTEIN_SKELETAL_MUSCLE_T_CELLS	0.9	1.32	0.84	1.1	1.19	2.02	0.15	1.49	0.65	3.21	3.29	3.26	5	1.07	1.98	2.77	0.6	-0.01	-0.03	0.56	0.1	-0.37	-1.06	-0.28	-0.18	-0.1	-0.32	0.01	0.07	-0.21	-0.25	-0.67	-0.51	-0.41	-0.59	-0.46	-0.47	-0.47	-0.54	-0.59	-0.58	-0.55	-0.52	-0.48	-0.47	-0.71	-0.58	-0.48	-0.51
RUBENSTEIN_SKELETAL_MUSCLE_B_CELLS	0.61	1.54	0.35	0.54	0.07	1.76	-0.21	0.91	1.04	2.83	1.37	3.88	4.13	0.16	1.33	1.33	0.09	-0.23	-0.1	0.11	0.07	-0.52	-0.98	-0.46	-0.08	-0.15	0	-0.55	-0.03	-0.22	0.01	-0.62	-0.34	-0.36	-0.59	-0.55	-0.41	-0.45	-0.4	-0.53	-0.56	-0.56	-0.49	-0.37	-0.41	-0.48	-0.54	-0.37	-0.52
DESCARTES_MAIN_FETAL_EPICARDIAL_FAT_CELLS	-0.27	-0.02	-0.37	0.77	0.35	1.72	-0.48	0.11	4.45	0.12	4.15	1.6	5.8	0.19	1.2	2.13	-0.23	1.67	1.15	0.26	-0.19	-0.53	-0.44	-0.19	-0.41	-0.28	-0.44	-0.14	-0.32	-0.32	-0.45	-0.58	-0.43	-0.42	-0.43	-0.49	-0.47	-0.32	-0.45	-0.38	-0.39	-0.38	-0.47	-0.48	-0.49	-0.35	-0.46	-0.39	-0.45
DESCARTES_MAIN_FETAL_SQUAMOUS_EPITHELIAL_CELLS	0.37	-0.11	-0.08	1.28	1.94	4.03	0.31	0.15	1.21	0.56	4.72	2.52	5.93	3.21	1.87	1.49	0.08	2.79	1.2	0.24	0.29	-0.33	-0.33	-0.3	-0.38	-0.14	-0.59	-0.21	-0.18	-0.32	-0.42	-0.43	-0.45	-0.28	-0.39	-0.37	-0.43	-0.37	-0.39	-0.29	-0.46	-0.37	-0.37	-0.37	-0.38	-0.33	-0.41	-0.41	-0.4
ZHENG_CORD_BLOOD_C3_MEGAKARYOCYTE_ERYTHROID_PROGENITOR	-0.05	0.89	0.13	0.72	1.41	3.44	-0.16	0.31	1.96	1.28	4.04	2.56	4.95	1.18	0.79	2.12	0.36	1.69	1.52	1.17	0.38	-0.59	-0.33	-0.34	-0.34	-0.32	-0.53	-0.2	-0.27	-0.36	-0.6	-0.45	-0.51	-0.32	-0.43	-0.38	-0.55	-0.3	-0.4	-0.41	-0.42	-0.4	-0.35	-0.41	-0.44	-0.47	-0.42	-0.42	-0.38
DESCARTES_FETAL_CEREBRUM_ASTROCYTES	0.41	3.83	1.81	2.58	0.75	3.14	0.12	1.19	4.28	0.56	1.27	3.29	5.4	2.7	2.89	2.73	1.54	-0.12	-0.27	0.17	1.09	-0.44	0.07	-0.22	-0.37	-0.17	-0.08	-0.19	-0.25	-0.35	-0.45	-0.44	-0.34	-0.4	-0.52	-0.34	-0.35	-0.36	-0.39	-0.35	-0.44	-0.4	-0.37	-0.38	-0.32	-0.4	-0.39	-0.4	-0.46
DESCARTES_FETAL_LUNG_CSH1_CSH2_POSITIVE_CELLS	0.34	2.01	2.18	2.7	0.4	1.88	0.57	1.87	3.38	0.54	1.9	1.79	5.31	1.3	1.67	1.37	2.64	0.02	-0.13	-0.57	-0.04	-0.41	-0.04	-0.41	-0.08	-0.25	-0.52	-0.63	-0.5	-0.38	-0.46	-0.54	-0.5	-0.43	-0.46	-0.4	-0.47	-0.49	-0.51	-0.36	-0.49	-0.47	-0.41	-0.47	-0.46	-0.53	-0.45	-0.47	-0.42
GAO_LARGE_INTESTINE_ADULT_CE_OLFM4HIGH_STEM_CELL	0.36	2.99	1.16	4.73	1.07	4.15	0.42	1.05	4.79	-0.33	3.19	2.23	5.81	2.84	3.18	2.01	3.12	0.28	0.32	0.19	0	-0.49	0.03	-0.43	-0.26	-0.18	-0.41	0.16	-0.35	-0.36	-0.37	-0.42	-0.48	-0.41	-0.43	-0.42	-0.42	-0.37	-0.38	-0.42	-0.41	-0.35	-0.31	-0.36	-0.34	-0.35	-0.38	-0.38	-0.37
DESCARTES_MAIN_FETAL_PAEP_MECOM_POSITIVE_CELLS	0.62	0.75	3.57	3.19	0.55	2.56	0.35	0.81	4.6	0.24	1.1	3.51	6.51	2.24	3.64	4.11	3.11	-0.11	-0.14	-0.12	0.23	-0.32	-0.59	-0.4	-0.34	-0.28	-0.35	-0.73	-0.36	-0.34	-0.52	-0.27	-0.5	-0.47	-0.42	-0.5	-0.43	-0.43	-0.43	-0.44	-0.45	-0.49	-0.34	-0.49	-0.43	-0.49	-0.4	-0.47	-0.37
DURANTE_ADULT_OLFACTORY_NEUROEPITHELIUM_GLOBOSE_BASAL_CELLS	0.41	1.66	1.3	2.13	0.12	2.94	-0.26	1.58	3.49	1.22	1.34	0.57	4.52	1.3	3.56	2.84	1.23	0.36	0.14	0.3	0.86	0.18	0.94	-0.04	-0.26	-0.12	-0.34	-0.6	-0.62	-0.34	-0.31	-0.52	-0.53	-0.39	-0.34	-0.49	-0.47	-0.31	-0.36	-0.37	-0.49	-0.37	-0.59	-0.4	-0.44	-0.51	-0.41	-0.43	-0.45
FAN_EMBRYONIC_CTX_ASTROCYTE_1	0.73	2.01	3.74	3.35	0.71	4.41	0.16	2.75	5.54	1.82	4.7	0.86	5.54	1.37	3.93	3.79	3.54	0.85	0.23	0.13	0.62	-0.46	-0.47	-0.24	-0.25	-0.02	-0.61	-0.39	-0.31	-0.37	-0.4	-0.39	-0.46	-0.37	-0.43	-0.38	-0.29	-0.25	-0.43	-0.38	-0.44	-0.35	-0.34	-0.4	-0.39	-0.38	-0.4	-0.4	-0.43
MENON_FETAL_KIDNEY_0_CAP_MESENCHYME_CELLS	0.18	0.42	1.9	3.53	1.13	3.38	0.31	0.89	3.41	0.9	2.05	1.03	3.17	0.35	2.38	2.55	0.62	0.3	0.03	-0.23	0.66	-0.54	-0.15	-0.53	0.08	-0.14	-0.25	-0.28	-0.14	-0.28	-0.53	-0.42	-0.42	-0.33	-0.44	-0.39	-0.39	-0.3	-0.41	-0.33	-0.33	-0.27	-0.32	-0.34	-0.4	-0.35	-0.33	-0.38	-0.32
CUI_DEVELOPING_HEART_5TH_WEEK_VENTRICULAR_CARDIOMYOCYTE	0.51	1.61	1.9	1.38	0.76	2.24	-0.12	1.35	3.34	1.45	4.06	1.36	4.5	0.94	0.83	0.57	0.48	-0.08	-0.34	0.14	0.36	-0.46	-0.5	-0.3	-0.01	-0.11	-0.29	-0.39	-0.33	-0.33	-0.46	-0.55	-0.45	-0.49	-0.4	-0.46	-0.36	-0.45	-0.39	-0.4	-0.42	-0.36	-0.48	-0.44	-0.44	-0.44	-0.49	-0.44	-0.49
AIZARANI_LIVER_C31_KUPFFER_CELLS_5	0.66	1.29	1.34	3.51	1.13	2.95	0.2	1.87	3.63	1.11	3.81	2.47	4.63	0.95	1.34	1.02	0.16	0.61	0.05	0.03	0.46	-0.44	-0.51	-0.52	-0.34	-0.17	-0.37	-0.07	-0.39	-0.35	-0.44	-0.35	-0.42	-0.31	-0.43	-0.46	-0.42	-0.42	-0.34	-0.44	-0.45	-0.36	-0.41	-0.46	-0.42	-0.46	-0.44	-0.41	-0.44
DURANTE_ADULT_OLFACTORY_NEUROEPITHELIUM_MAST_CELLS	2.41	2.42	1.12	2.43	1.02	2.81	0.16	1.98	2.47	1.23	5.11	2.98	5.93	0.61	1.38	1.76	0.05	0.73	0.16	0.72	-0.2	-0.43	-0.53	-0.41	-0.39	0.06	-0.37	-0.49	-0.33	-0.37	-0.46	-0.52	-0.45	-0.43	-0.45	-0.43	-0.49	-0.36	-0.43	-0.39	-0.42	-0.37	-0.43	-0.4	-0.42	-0.46	-0.48	-0.42	-0.42
DESCARTES_MAIN_FETAL_CILIATED_EPITHELIAL_CELLS	0.83	0.52	-0.08	3.08	0.44	3.14	0.32	1.21	2.9	1.84	4.75	2.58	6.53	0.32	1.8	1.56	0.97	0	0.19	0.17	0.09	-0.53	-0.13	-0.01	-0.27	-0.26	0.1	1.26	-0.24	-0.25	-0.19	-0.54	-0.15	-0.25	-0.23	-0.23	-0.32	-0.22	-0.29	-0.32	-0.37	-0.18	-0.37	-0.27	-0.24	-0.2	-0.3	-0.37	-0.2
ZHENG_CORD_BLOOD_C5_SIMILAR_TO_HSC_C6_PUTATIVE_ALTERED_METABOLIC_STATE	0.98	1.22	1.07	1.45	0.55	3.22	-0.12	1.9	3.85	1.89	2.94	3.58	2.59	0.45	1.79	1.95	0.09	0.21	0.06	0.25	-0.08	-0.4	-0.32	-0.43	-0.29	-0.14	-0.16	-0.7	-0.3	-0.38	-0.5	-0.53	-0.42	-0.44	-0.55	-0.53	-0.53	-0.51	-0.51	-0.41	-0.51	-0.53	-0.55	-0.52	-0.53	-0.57	-0.55	-0.49	-0.55
CUI_DEVELOPING_HEART_5TH_WEEK_ATRIAL_CARDIOMYOCYTE	0.45	0.29	2.16	0.65	1.1	2.34	0.48	0.8	3.64	2.02	2.8	4.41	3.22	3.37	2.04	2.54	1.27	0.18	-0.24	-0.29	0.34	-0.38	-0.12	-0.19	-0.19	0.62	-0.51	-0.4	-0.19	-0.31	-0.48	-0.48	-0.37	-0.38	-0.43	-0.35	-0.39	-0.4	-0.44	-0.33	-0.42	-0.41	-0.42	-0.37	-0.46	-0.43	-0.35	-0.34	-0.38
CUI_DEVELOPING_HEART_ENDOCARDIAL_CELL	0.79	0.55	1.29	0.91	0.7	0.49	0.32	0.94	1.97	0.77	1.75	2.6	2.92	1.74	2.39	1.77	1.63	-0.12	-0.35	-0.61	0.14	-0.29	-0.68	-0.37	-0.26	-0.07	-0.53	-0.38	-0.37	-0.42	-0.5	-0.46	-0.47	-0.4	-0.41	-0.48	-0.46	-0.43	-0.42	-0.4	-0.46	-0.45	-0.46	-0.44	-0.45	-0.47	-0.48	-0.43	-0.47
AIZARANI_LIVER_C14_HEPATOCYTES_2	0.27	1.5	1.78	0.07	0.44	1.63	0.13	1.53	2.79	0.63	2.06	1.7	3.97	1	1.37	0.62	0.73	-0.01	-0.21	-0.51	0.09	-0.58	-0.54	-0.33	-0.16	0.04	-0.49	-0.54	-0.35	-0.39	-0.43	-0.53	-0.55	-0.46	-0.43	-0.58	-0.61	-0.52	-0.54	-0.61	-0.56	-0.47	-0.6	-0.54	-0.53	-0.58	-0.51	-0.49	-0.38
DESCARTES_FETAL_MUSCLE_LYMPHATIC_ENDOTHELIAL_CELLS	-0.09	0.11	1.36	0.99	1.78	2.5	-0.1	1.11	3.04	-0.21	4.2	2.05	4.83	0.8	2.71	1.84	1.12	1.13	0.55	0.15	0.49	-0.53	-0.51	-0.2	-0.04	-0.18	-0.37	-0.73	-0.26	-0.24	-0.57	-0.44	-0.51	-0.2	-0.33	-0.42	-0.49	-0.28	-0.37	-0.29	-0.45	-0.35	-0.4	-0.31	-0.34	-0.27	-0.44	-0.35	-0.32
CUI_DEVELOPING_HEART_LEFT_VENTRICULAR_CARDIOMYOCYTE	0.94	0.08	2.2	0.79	1.71	2.25	0.23	0.53	3.73	1.53	4.14	3.06	5.12	1.85	2.36	2.42	0.71	0.83	0.04	0.13	0.07	-0.42	-0.44	-0.49	-0.15	0.88	-0.37	-0.4	-0.3	-0.38	-0.51	-0.47	-0.41	-0.42	-0.46	-0.49	-0.48	-0.42	-0.51	-0.42	-0.45	-0.48	-0.47	-0.47	-0.48	-0.5	-0.44	-0.49	-0.48
DESCARTES_FETAL_PLACENTA_IGFBP1_DKK1_POSITIVE_CELLS	0.47	1.08	1.66	0.03	1.8	2.73	0.54	0.89	3.65	2.13	4.54	2.96	5.18	1.94	3.07	2.54	2.74	0.6	-0.12	-0.07	0.67	-0.53	-0.2	-0.38	-0.21	0.44	-0.41	-0.58	-0.24	-0.37	-0.45	-0.4	-0.41	-0.37	-0.32	-0.37	-0.37	-0.38	-0.39	-0.44	-0.44	-0.44	-0.27	-0.4	-0.42	-0.43	-0.45	-0.35	-0.37
TRAVAGLINI_LUNG_SEROUS_CELL	1.14	0.67	0.1	-0.02	2.15	3	0.29	0.74	3.76	1.02	2.64	2.86	4.42	0.99	2.9	2.62	0.78	0	-0.31	-0.76	-0.09	-0.53	-0.4	-0.21	-0.14	-0.32	-0.26	-0.53	-0.35	-0.35	-0.54	-0.47	-0.54	-0.53	-0.51	-0.52	-0.52	-0.48	-0.48	-0.53	-0.54	-0.5	-0.49	-0.48	-0.45	-0.52	-0.45	-0.56	-0.45
GAUTAM_EYE_IRIS_CILIARY_BODY_CRYAA_HIGH_CILIARY_BODY_CELLS	0.7	0.9	0.95	1.02	0.78	2.69	0.01	2.11	4.24	1.44	3.47	1.84	7.19	1.45	3.92	4.04	0.84	0.27	0	0.57	0.1	-0.56	-1.01	-0.54	-0.29	-0.24	-0.29	-0.68	-0.52	-0.27	-0.33	-0.53	-0.55	-0.42	-0.32	-0.52	-0.48	-0.47	-0.44	-0.46	-0.46	-0.47	-0.41	-0.49	-0.49	-0.5	-0.49	-0.52	-0.4
DESCARTES_FETAL_MUSCLE_SKELETAL_MUSCLE_CELLS	2.15	0.5	-0.27	3.67	2.11	2.3	1.42	1.88	3.71	0.6	3.07	3.3	5.14	1.58	4.44	3.4	3.35	-0.25	-0.3	0.4	0.73	-0.33	-0.12	-0.29	-0.39	-0.33	-0.17	-0.42	-0.48	-0.38	-0.53	-0.43	-0.39	-0.48	-0.52	-0.46	-0.5	-0.51	-0.49	-0.52	-0.49	-0.44	-0.52	-0.51	-0.47	-0.56	-0.48	-0.41	-0.52
HAY_BONE_MARROW_CD34_POS_MKP	0.89	-0.17	-0.14	2.49	1.68	2.06	0	1.95	3.15	0.01	2.17	1.06	3.32	0.68	2.17	2.06	1.77	-0.05	-0.34	0.12	0.32	-0.32	-0.39	-0.29	-0.37	-0.31	-0.39	-0.44	-0.42	-0.39	-0.43	-0.51	-0.48	-0.45	-0.48	-0.45	-0.43	-0.45	-0.44	-0.39	-0.43	-0.41	-0.45	-0.44	-0.43	-0.42	-0.43	-0.39	-0.44
DESCARTES_FETAL_EYE_SKELETAL_MUSCLE_CELLS	0.35	1.19	0.17	2.3	1.86	2.66	0.56	1.4	2.85	2.89	1.71	2.48	4.63	2.1	4.02	4.37	2.41	-0.07	-0.28	0.73	-0.13	-0.16	0.85	-0.43	-0.22	0.01	-0.07	-0.14	-0.05	-0.32	-0.6	-0.43	-0.33	-0.49	-0.4	-0.39	-0.38	-0.43	-0.37	-0.44	-0.43	-0.5	-0.42	-0.4	-0.35	-0.46	-0.36	-0.34	-0.43
FAN_EMBRYONIC_CTX_BRAIN_B_CELL	-0.31	0.42	0.07	2.54	0.27	2.46	-0.15	1.82	3	2.92	1.77	2.11	3.53	0.97	0.92	1.98	1.21	-0.05	-0.19	0.03	0.08	-0.21	-0.48	-0.07	-0.24	-0.37	-0.52	0.11	-0.16	-0.24	-0.35	-0.54	-0.52	-0.44	-0.4	-0.62	-0.54	-0.53	-0.49	-0.47	-0.48	-0.49	-0.45	-0.51	-0.51	-0.47	-0.43	-0.44	-0.37
DESCARTES_MAIN_FETAL_CCL19_CCL21_POSITIVE_CELLS	-0.03	1.01	0.14	1.19	1.14	1.88	-0.17	1.52	2.35	2.44	1.76	3.59	3.58	0.58	1.9	1.37	1.51	-0.11	-0.07	-0.05	-0.17	-0.57	-0.7	-0.16	-0.24	-0.29	-0.28	-0.46	-0.08	-0.38	-0.47	-0.35	-0.43	-0.36	-0.38	-0.51	-0.48	-0.43	-0.41	-0.37	-0.44	-0.47	-0.44	-0.43	-0.43	-0.38	-0.41	-0.43	-0.38
DESCARTES_MAIN_FETAL_EXTRAVILLOUS_TROPHOBLASTS	0.55	0.18	0.52	1.89	0.44	1.37	-0.04	1.46	2.86	1.85	3.15	2.3	3.96	1.36	2.41	2.5	1.47	-0.21	-0.25	0.95	0.09	-0.41	-0.48	-0.47	-0.24	-0.32	-0.45	-0.42	-0.49	-0.4	-0.5	-0.49	-0.44	-0.41	-0.45	-0.42	-0.45	-0.46	-0.48	-0.42	-0.45	-0.44	-0.44	-0.42	-0.46	-0.48	-0.43	-0.47	-0.4
DESCARTES_MAIN_FETAL_IGFBP1_DKK1_POSITIVE_CELLS	0.61	0.95	1.99	3.23	1.24	2.67	-0.01	1.09	4.53	2.92	3.73	3.83	6.41	2.09	3.13	2.7	1.57	0.45	-0.28	-0.06	0.25	-0.46	-0.48	-0.24	-0.4	0.09	-0.37	-0.46	-0.31	-0.39	-0.48	-0.41	-0.43	-0.38	-0.36	-0.46	-0.41	-0.41	-0.44	-0.46	-0.42	-0.39	-0.36	-0.41	-0.41	-0.41	-0.46	-0.38	-0.41
BUSSLINGER_DUODENAL_TUFT_CELLS	0.08	0.33	0.2	2.15	1.45	2.04	0.11	1.98	3.56	2.03	3.25	3.42	3.88	1.34	2.83	3.64	2.19	0	-0.27	-0.64	0.5	-0.41	-0.47	-0.23	-0.28	-0.29	-0.38	-0.31	-0.34	-0.39	-0.4	-0.47	-0.42	-0.41	-0.37	-0.42	-0.36	-0.41	-0.41	-0.4	-0.43	-0.38	-0.42	-0.42	-0.41	-0.43	-0.39	-0.39	-0.42
DURANTE_ADULT_OLFACTORY_NEUROEPITHELIUM_VASCULAR_SMOOTH_MUSCLE_CELLS	0.95	1.16	0.07	3.06	1.46	2.22	0.33	2.34	4.08	1.75	1.35	3.34	4.54	1.67	2.37	2.32	2.71	-0.33	-0.39	0.3	-0.3	-0.5	-0.52	-0.27	-0.32	-0.22	-0.45	-0.37	-0.31	-0.41	-0.43	-0.46	-0.43	-0.48	-0.4	-0.47	-0.42	-0.48	-0.42	-0.43	-0.44	-0.45	-0.4	-0.44	-0.45	-0.49	-0.49	-0.44	-0.45
TRAVAGLINI_LUNG_VASCULAR_SMOOTH_MUSCLE_CELL	-0.33	0.17	0.31	3.17	1.28	2.03	0	1.75	3.18	1.71	2.07	2.95	3.67	1.78	2.09	2.29	1.96	-0.29	-0.37	-0.04	-0.17	-0.45	-0.46	-0.45	-0.35	0.08	-0.51	-0.47	-0.42	-0.39	-0.4	-0.48	-0.42	-0.42	-0.45	-0.46	-0.46	-0.45	-0.43	-0.41	-0.45	-0.43	-0.46	-0.45	-0.45	-0.46	-0.44	-0.38	-0.47
RUBENSTEIN_SKELETAL_MUSCLE_SMOOTH_MUSCLE_CELLS	0.55	1.14	0.79	2.76	1.45	3.37	0.15	1.84	3.33	2.2	2.23	3	6.07	2.49	2.21	3.44	2.53	-0.25	-0.31	-0.28	0.4	-0.26	-0.45	-0.33	-0.35	-0.2	-0.15	-0.31	-0.19	-0.31	-0.44	-0.66	-0.38	-0.44	-0.49	-0.41	-0.42	-0.51	-0.48	-0.42	-0.49	-0.46	-0.42	-0.38	-0.46	-0.56	-0.49	-0.39	-0.46
TRAVAGLINI_LUNG_AIRWAY_SMOOTH_MUSCLE_CELL	-0.06	0.93	0.11	2.34	1.09	2.31	-0.04	1.57	2.83	2.16	2.15	3.17	5.32	1.64	1.91	2.69	2.29	-0.37	-0.45	-0.44	-0.36	-0.54	-0.51	-0.41	-0.38	-0.26	-0.27	-0.12	-0.39	-0.41	-0.4	-0.61	-0.56	-0.43	-0.5	-0.52	-0.53	-0.53	-0.49	-0.49	-0.55	-0.5	-0.52	-0.5	-0.49	-0.56	-0.53	-0.52	-0.53
VANGURP_PANCREATIC_BETA_CELL	0.15	1.26	1.21	3.35	1.54	3.2	0.03	1.81	3.81	2.19	2.72	3.29	6.1	1.08	3.43	2.2	3.03	-0.03	-0.39	0	0.49	-0.49	-0.49	-0.35	-0.35	-0.38	-0.32	-0.42	-0.48	-0.39	-0.39	-0.56	-0.5	-0.44	-0.43	-0.51	-0.56	-0.48	-0.4	-0.45	-0.52	-0.47	-0.54	-0.47	-0.49	-0.58	-0.5	-0.49	-0.54
GAUTAM_EYE_IRIS_CILIARY_BODY_FIBROBLASTS	1.32	0.64	2.04	1.71	1.47	3.58	0.11	1.99	4.31	1.81	2.62	2.8	4.97	2.53	2.08	3.31	2.09	0.11	-0.39	0.49	0.31	-0.57	-0.66	-0.35	0	0.16	-0.13	-0.67	-0.14	-0.33	-0.65	-0.44	-0.47	-0.45	-0.39	-0.57	-0.49	-0.53	-0.49	-0.44	-0.54	-0.5	-0.52	-0.49	-0.53	-0.44	-0.51	-0.57	-0.46
ZHENG_CORD_BLOOD_C1_PUTATIVE_MEGAKARYOCYTE_PROGENITOR	-0.01	-0.18	-0.09	2.96	2.07	3.74	0.24	2.35	3.24	1.88	3.17	1.52	5.19	1.58	2.65	3.78	1.62	-0.2	-0.33	-0.47	0	-0.49	-0.29	-0.37	-0.27	0.1	-0.44	-0.42	-0.36	-0.33	-0.43	-0.55	-0.47	-0.41	-0.42	-0.45	-0.46	-0.43	-0.4	-0.38	-0.42	-0.4	-0.47	-0.41	-0.44	-0.48	-0.39	-0.43	-0.39
GAUTAM_EYE_CORNEA_ELF3_HIGH_EPITHELIAL_CELLS	0.47	0.81	0.12	1.27	0.72	2.71	-0.09	2.3	3.97	2.15	3.95	3.23	4.85	1.93	0.89	2.29	1.02	1.38	1.29	0.23	0.42	-0.48	-0.4	-0.45	-0.23	-0.24	-0.28	-0.29	-0.17	-0.36	-0.48	-0.55	-0.58	-0.49	-0.57	-0.61	-0.55	-0.51	-0.49	-0.52	-0.55	-0.53	-0.49	-0.53	-0.53	-0.6	-0.57	-0.54	-0.5
FAN_EMBRYONIC_CTX_BRAIN_NAIVE_LIKE_T_CELL	0.23	0.3	0.34	2.44	1.88	3.21	-0.05	1.67	3.83	1.77	5.79	2.78	5.67	2.04	1.23	2.49	2.22	0.43	-0.23	0.9	0.18	-0.4	-0.46	-0.19	-0.14	-0.01	-0.61	-0.5	-0.15	-0.24	-0.28	-0.34	-0.54	-0.36	-0.32	-0.35	-0.47	-0.26	-0.37	-0.48	-0.36	-0.33	-0.39	-0.41	-0.42	-0.39	-0.3	-0.36	-0.32
TRAVAGLINI_LUNG_BASAL_CELL	-0.13	0.52	0.54	3.71	1.11	4.03	0.32	2.91	4.07	1.9	5.07	3.49	6.52	2.66	1.85	2.61	2.73	0.96	0.25	0.78	0.27	-0.54	-0.29	-0.28	-0.29	0.19	-0.27	-0.22	-0.23	-0.33	-0.25	-0.43	-0.45	-0.31	-0.37	-0.34	-0.45	-0.31	-0.39	-0.35	-0.39	-0.31	-0.37	-0.34	-0.33	-0.41	-0.39	-0.34	-0.27
CUI_DEVELOPING_HEART_C2_CARDIOMYOCYTE	0.95	1.86	0.09	0.9	0.3	1.42	-0.03	0.39	2.13	1.78	2.39	0.82	3.91	0.3	2.78	2.79	1.18	-0.08	-0.25	0.25	0.33	-0.29	-0.33	-0.51	-0.2	0.78	-0.03	0.06	-0.06	-0.32	-0.7	-0.56	-0.38	-0.58	-0.53	-0.54	-0.46	-0.52	-0.43	-0.55	-0.5	-0.59	-0.49	-0.42	-0.42	-0.56	-0.48	-0.5	-0.47
DESCARTES_FETAL_EYE_STROMAL_CELLS	1.94	2.52	-0.16	1.89	0.57	0.86	-0.16	0.63	3.52	1.06	2.12	1.9	5.23	-0.08	3.22	3.48	2.31	-0.13	-0.22	0.46	-0.11	-0.42	-0.55	0.38	-0.17	-0.07	-0.18	-0.4	-0.38	-0.34	-0.4	-0.2	-0.38	-0.36	-0.36	-0.36	-0.34	-0.4	-0.41	-0.35	-0.39	-0.4	-0.42	-0.37	-0.4	-0.41	-0.36	-0.35	-0.37
DESCARTES_FETAL_KIDNEY_STROMAL_CELLS	1.59	1.67	-0.09	1.15	0.93	0.98	0.06	0.78	2.69	1.2	1.55	1.08	5.83	-0.38	2.27	2.89	2.27	-0.16	-0.26	-0.2	-0.09	-0.45	-0.57	-0.05	-0.4	-0.33	-0.32	-0.31	-0.42	-0.39	-0.46	-0.31	-0.42	-0.37	-0.45	-0.38	-0.35	-0.4	-0.45	-0.4	-0.41	-0.41	-0.39	-0.42	-0.42	-0.45	-0.44	-0.41	-0.46
DESCARTES_FETAL_CEREBELLUM_MICROGLIA	1.1	2.17	0.44	2.46	0.57	1.71	0.03	1.16	1.93	1.71	3.01	2.21	4.89	1.48	3.33	2.41	1.14	0.58	0.17	-0.3	-0.1	-0.59	-0.47	-0.28	-0.33	-0.29	-0.42	-0.34	-0.34	-0.4	-0.54	-0.44	-0.52	-0.43	-0.45	-0.47	-0.47	-0.48	-0.43	-0.51	-0.54	-0.49	-0.51	-0.47	-0.53	-0.49	-0.49	-0.46	-0.46
DESCARTES_FETAL_CEREBRUM_MICROGLIA	0.43	1.84	0.07	3.24	0.26	1.8	0.01	1.42	1.48	1.07	3.74	2.3	5.52	1.49	3.51	3.25	1.06	0.86	0.42	-0.09	-0.08	-0.46	-0.51	0.34	-0.39	-0.38	-0.42	-0.15	-0.41	-0.39	-0.5	-0.32	-0.5	-0.38	-0.5	-0.43	-0.44	-0.38	-0.4	-0.28	-0.47	-0.46	-0.45	-0.41	-0.45	-0.45	-0.49	-0.43	-0.48
DESCARTES_FETAL_LIVER_MYELOID_CELLS	0.42	1.75	0.47	3.5	0.48	1.88	0.1	1.73	2.92	1.13	1.98	1.33	4.81	1.24	3.97	3.02	0.4	0.68	0.43	-0.03	-0.12	-0.46	-0.38	-0.26	-0.36	-0.34	-0.25	-0.09	-0.32	-0.38	-0.39	-0.38	-0.44	-0.38	-0.38	-0.39	-0.36	-0.33	-0.34	-0.36	-0.42	-0.37	-0.38	-0.37	-0.34	-0.38	-0.37	-0.32	-0.38
DESCARTES_MAIN_FETAL_LYMPHATIC_ENDOTHELIAL_CELLS	0.71	1.66	1.16	2.55	1.18	0.88	-0.02	1.33	2.65	0.3	3.48	1.41	4.2	0.64	2.19	3.05	0.25	0.66	0.35	0.34	0.76	-0.41	-0.57	-0.16	-0.22	0.26	-0.48	0.22	-0.38	-0.28	-0.41	-0.38	-0.31	-0.31	-0.41	-0.43	-0.5	-0.34	-0.4	-0.33	-0.41	-0.35	-0.45	-0.39	-0.41	-0.4	-0.41	-0.42	-0.33
TRAVAGLINI_LUNG_ALVEOLAR_EPITHELIAL_TYPE_2_CELL	1.08	1.66	0.31	1.83	1.6	2.2	-0.06	2.41	0.91	-0.12	2.14	1.54	3.64	1.25	3.86	2.82	0.73	-0.07	-0.41	-0.32	-0.18	-0.69	-0.33	-0.41	-0.14	0.27	-0.02	-0.06	-0.46	-0.38	-0.67	-0.59	-0.45	-0.6	-0.57	-0.54	-0.59	-0.51	-0.5	-0.47	-0.58	-0.54	-0.51	-0.46	-0.51	-0.57	-0.55	-0.59	-0.62
BUSSLINGER_DUODENAL_LATE_IMMATURE_ENTEROCYTES	1.49	1.51	0.67	1.33	0.53	1.91	0.02	1.32	0.76	0.07	2.32	0.76	3.91	1.22	0.81	1.33	0.73	-0.03	-0.23	-0.65	-0.21	-0.51	-0.52	-0.37	-0.32	-0.12	-0.24	-0.47	-0.39	-0.38	-0.53	-0.61	-0.49	-0.51	-0.44	-0.53	-0.5	-0.51	-0.5	-0.47	-0.5	-0.44	-0.45	-0.46	-0.46	-0.55	-0.43	-0.5	-0.47
DESCARTES_FETAL_MUSCLE_MEGAKARYOCYTES	1.93	1.81	0.23	1.89	1.75	3.25	0.54	3.02	0.6	0.42	2.08	2.05	5.61	1.64	2.15	2.36	0.93	-0.22	-0.28	-0.45	0.1	-0.51	-0.44	-0.44	-0.25	-0.06	-0.07	-0.16	-0.31	-0.38	-0.59	-0.6	-0.5	-0.48	-0.45	-0.55	-0.45	-0.48	-0.45	-0.42	-0.52	-0.48	-0.52	-0.46	-0.5	-0.5	-0.49	-0.48	-0.5
FAN_OVARY_CL0_XBP1_SELK_HIGH_STROMAL_CELL	1.33	1.62	0.39	0.66	0.55	2.63	0.25	1.29	0.07	0.94	2.02	1.22	3.07	0.67	1.32	1.35	1.39	0.01	0.15	-0.54	-0.21	-0.56	-0.91	-0.37	-0.41	-0.12	-0.36	-0.57	-0.31	-0.31	-0.2	-0.62	-0.56	-0.5	-0.55	-0.58	-0.54	-0.5	-0.54	-0.51	-0.57	-0.54	-0.48	-0.51	-0.44	-0.59	-0.67	-0.53	-0.48
DESCARTES_FETAL_CEREBRUM_MEGAKARYOCYTES	1.78	1.62	0.37	1.65	0.89	2.86	0.72	1.51	0.5	0.85	2.79	1.73	4.92	0.75	3	3.19	1.38	-0.23	-0.28	0	0.29	-0.51	-0.49	-0.35	-0.02	0.41	-0.36	-0.29	-0.45	-0.39	-0.63	-0.38	-0.5	-0.34	-0.42	-0.51	-0.43	-0.49	-0.43	-0.4	-0.48	-0.46	-0.47	-0.44	-0.48	-0.46	-0.49	-0.41	-0.47
GAUTAM_EYE_CORNEA_MELANOCYTES	1.42	2.69	0.27	2.9	1	2.94	0.78	1.79	0.9	1.92	2.26	3.02	6.12	1.03	3.13	3.39	1.85	-0.1	-0.33	-0.12	0.45	-0.56	-0.56	-0.4	-0.22	-0.24	0.01	-0.08	-0.23	-0.27	-0.29	-0.55	-0.41	-0.41	-0.53	-0.48	-0.43	-0.42	-0.33	-0.36	-0.51	-0.46	-0.44	-0.35	-0.34	-0.49	-0.46	-0.34	-0.39
TRAVAGLINI_LUNG_NONCLASSICAL_MONOCYTE_CELL	1.29	1.72	1.05	2.63	0.42	2.06	1.43	2.09	0.97	0.79	2.63	2.31	5.27	1.71	2.58	2.16	1.28	-0.04	-0.2	-0.14	0.93	0.07	-0.33	-0.37	-0.25	0.04	-0.49	-0.16	-0.34	-0.37	-0.51	-0.38	-0.55	-0.41	-0.45	-0.49	-0.52	-0.39	-0.42	-0.43	-0.46	-0.41	-0.5	-0.5	-0.4	-0.47	-0.42	-0.47	-0.4
BUSSLINGER_GASTRIC_PPP1R1B_POSITIVE_CELLS	1.77	1.72	-0.23	2.49	0.46	2.88	0.47	2.6	3.43	1.72	3.68	2.14	4.45	0.83	2.62	2.19	0.67	0.33	0.18	-0.18	-0.24	-0.5	-1.01	-0.35	-0.34	-0.22	-0.06	-0.4	-0.01	-0.32	-0.1	-0.47	-0.43	-0.28	-0.47	-0.58	-0.41	-0.42	-0.38	-0.43	-0.51	-0.47	-0.47	-0.43	-0.4	-0.46	-0.54	-0.45	-0.52
BUSSLINGER_DUODENAL_STEM_CELLS	1.4	1.86	0.13	1.02	0.87	3.41	-0.02	1.8	2.65	1.29	3.11	2.49	4.4	1.29	1.62	2.13	0.68	0.05	-0.22	-0.21	0.27	-0.62	-0.46	-0.32	-0.24	-0.36	-0.19	-0.31	-0.24	-0.39	-0.33	-0.61	-0.39	-0.3	-0.46	-0.5	-0.48	-0.4	-0.42	-0.39	-0.47	-0.41	-0.47	-0.42	-0.43	-0.46	-0.49	-0.4	-0.35
TRAVAGLINI_LUNG_LYMPHATIC_CELL	1.84	2.47	0.34	2.21	1.66	3.8	-0.05	2.45	3.09	0.81	4.36	2.02	5.76	1.95	1.76	2.56	1.73	0.87	0.28	-0.54	0.15	-0.5	-0.51	-0.33	-0.4	-0.27	-0.49	-0.19	-0.44	-0.42	-0.53	-0.48	-0.47	-0.47	-0.47	-0.5	-0.46	-0.46	-0.44	-0.49	-0.5	-0.44	-0.51	-0.47	-0.48	-0.52	-0.51	-0.46	-0.49
DESCARTES_FETAL_CEREBELLUM_VASCULAR_ENDOTHELIAL_CELLS	2.04	2.97	0.85	0.43	0.76	1.5	0.35	1.53	2.58	1.05	2.13	2.1	4.53	1.53	1.23	1.73	1.54	-0.06	-0.27	-0.54	-0.23	-0.5	-0.43	-0.38	-0.26	0.15	-0.47	-0.31	-0.38	-0.39	-0.43	-0.45	-0.4	-0.42	-0.41	-0.42	-0.45	-0.44	-0.41	-0.44	-0.44	-0.4	-0.44	-0.43	-0.43	-0.45	-0.44	-0.43	-0.42
DESCARTES_FETAL_CEREBRUM_VASCULAR_ENDOTHELIAL_CELLS	2.31	2.97	1.3	0.33	0.62	1.45	0.47	1.29	2.42	1.13	2.63	2.68	4.1	1.79	1.09	1.81	1.54	-0.05	-0.15	-0.57	-0.19	-0.52	-0.53	-0.31	-0.27	0.13	-0.56	-0.44	-0.45	-0.39	-0.47	-0.51	-0.48	-0.44	-0.48	-0.51	-0.49	-0.44	-0.44	-0.48	-0.5	-0.44	-0.48	-0.49	-0.49	-0.48	-0.5	-0.46	-0.46
AIZARANI_LIVER_C20_LSECS_3	2.37	2.96	0.47	1.9	0.59	2.47	0.39	1.41	1.64	1.17	2.74	2.44	4.6	1.18	2.11	1.83	1.48	0.27	-0.07	-0.36	-0.23	-0.51	-0.33	-0.26	-0.28	-0.08	-0.31	-0.39	-0.38	-0.38	-0.43	-0.45	-0.45	-0.39	-0.39	-0.41	-0.46	-0.39	-0.39	-0.35	-0.4	-0.39	-0.42	-0.39	-0.38	-0.41	-0.43	-0.41	-0.41
AIZARANI_LIVER_C13_LSECS_2	2.32	2.9	0.45	2.14	0.64	1.76	-0.19	1.58	1.99	1.26	2.2	2.27	5.48	0.97	1.66	1.95	1.36	0.15	-0.15	-0.43	-0.03	-0.45	-0.49	-0.37	-0.27	-0.01	-0.51	-0.37	-0.39	-0.37	-0.36	-0.35	-0.45	-0.37	-0.38	-0.4	-0.44	-0.37	-0.4	-0.39	-0.38	-0.36	-0.43	-0.4	-0.43	-0.38	-0.43	-0.44	-0.36
AIZARANI_LIVER_C9_LSECS_1	2.33	2.63	0.42	1.56	0.8	2.12	0.36	1.53	1.68	1.19	2.38	2.14	5.38	1.13	1.64	1.62	1.45	0.29	-0.15	-0.04	-0.1	-0.5	-0.48	-0.27	-0.3	-0.15	-0.32	-0.38	-0.39	-0.4	-0.41	-0.47	-0.47	-0.45	-0.44	-0.46	-0.45	-0.41	-0.44	-0.4	-0.44	-0.4	-0.48	-0.42	-0.43	-0.46	-0.45	-0.43	-0.43
FAN_EMBRYONIC_CTX_BIG_GROUPS_BRAIN_ENDOTHELIAL	2.25	2.84	0.16	1.51	0.75	2.27	0.33	1.26	1.84	0.98	2.14	2.16	4.71	1.09	1.3	2.22	1.85	-0.13	-0.29	-0.7	-0.24	-0.47	-0.38	-0.4	-0.34	-0.13	-0.47	-0.3	-0.38	-0.38	-0.44	-0.43	-0.45	-0.42	-0.43	-0.44	-0.45	-0.42	-0.43	-0.43	-0.42	-0.41	-0.43	-0.43	-0.43	-0.43	-0.42	-0.45	-0.41
FAN_EMBRYONIC_CTX_BRAIN_ENDOTHELIAL_2	2.11	2.81	0.28	1.42	0.85	2.79	0.04	1.4	2.05	1.11	2.57	1.77	4.81	1.4	1.26	2.02	1.63	-0.16	-0.33	0.08	-0.31	-0.51	-0.39	-0.37	-0.35	-0.2	-0.44	-0.3	-0.37	-0.41	-0.4	-0.46	-0.43	-0.41	-0.45	-0.38	-0.46	-0.41	-0.42	-0.41	-0.4	-0.42	-0.42	-0.42	-0.42	-0.42	-0.4	-0.4	-0.4
AIZARANI_LIVER_C21_STELLATE_CELLS_1	2.36	3.06	0.71	1.39	0.78	1.84	-0.08	1.05	2.68	1.64	2.86	2.37	5.34	0.85	2.15	2.45	1.64	0.1	-0.24	-0.26	-0.31	-0.45	-0.44	-0.32	-0.33	-0.18	-0.45	-0.33	-0.33	-0.39	-0.36	-0.45	-0.46	-0.39	-0.43	-0.47	-0.46	-0.4	-0.4	-0.41	-0.4	-0.39	-0.42	-0.44	-0.44	-0.46	-0.45	-0.45	-0.4
HU_FETAL_RETINA_FIBROBLAST	2	2.66	0.59	0.87	0.79	2.08	-0.15	1.24	2	0.92	2.63	2.37	4.24	1.09	1.48	1.55	1.47	0.07	-0.17	-0.39	-0.14	-0.53	-0.38	-0.31	-0.38	-0.27	-0.45	-0.36	-0.38	-0.4	-0.42	-0.44	-0.44	-0.45	-0.44	-0.46	-0.45	-0.41	-0.43	-0.44	-0.44	-0.43	-0.46	-0.45	-0.46	-0.48	-0.46	-0.44	-0.44
AIZARANI_LIVER_C10_MVECS_1	2.12	2.58	0.54	1.07	0.72	2.57	0.61	1.52	2.14	1.59	2.84	2.41	5.66	1.48	2.06	1.84	2.05	-0.25	-0.4	-0.6	-0.23	-0.52	-0.39	-0.32	-0.31	0.02	-0.46	-0.35	-0.42	-0.43	-0.45	-0.45	-0.49	-0.43	-0.44	-0.49	-0.48	-0.44	-0.49	-0.48	-0.43	-0.45	-0.49	-0.49	-0.49	-0.47	-0.48	-0.51	-0.44
MANNO_MIDBRAIN_NEUROTYPES_HENDO	1.68	2.58	1.08	1.12	0.82	2.48	0.23	1.57	1.89	1.3	3	2.38	6.03	1.66	2.02	2.09	2.06	0.05	-0.1	-0.65	-0.24	-0.56	-0.4	-0.36	-0.34	0.07	-0.43	-0.36	-0.35	-0.39	-0.49	-0.52	-0.44	-0.46	-0.42	-0.47	-0.48	-0.43	-0.4	-0.43	-0.48	-0.42	-0.46	-0.43	-0.43	-0.47	-0.44	-0.47	-0.46
MANNO_MIDBRAIN_NEUROTYPES_HPERIC	2.18	2.65	0.14	0.92	0.88	2.73	0.13	1.47	2.46	1.5	3.33	2.47	6	1.51	1.81	2.23	1.53	-0.15	-0.35	-0.64	-0.4	-0.51	-0.29	-0.44	-0.21	-0.27	-0.46	-0.33	-0.36	-0.39	-0.43	-0.42	-0.4	-0.39	-0.36	-0.41	-0.47	-0.41	-0.39	-0.42	-0.42	-0.39	-0.42	-0.39	-0.41	-0.4	-0.43	-0.4	-0.4
MURARO_PANCREAS_MESENCHYMAL_STROMAL_CELL	2.17	2.67	0.35	1.83	0.9	2.54	0.07	1.12	2.07	0.74	3.21	2.21	6.13	1.09	1.37	1.59	2.13	0.11	-0.09	-0.03	-0.19	-0.52	-0.39	-0.23	-0.3	-0.25	-0.4	-0.31	-0.37	-0.38	-0.38	-0.47	-0.4	-0.39	-0.42	-0.41	-0.41	-0.4	-0.4	-0.41	-0.42	-0.39	-0.41	-0.4	-0.39	-0.42	-0.43	-0.36	-0.38
FAN_EMBRYONIC_CTX_BRAIN_ENDOTHELIAL_1	1.95	2.83	0.68	0.43	0.82	2.16	0.22	1.35	0.9	1.16	2.37	1.54	4.97	1.29	1.75	2.37	2.07	-0.1	-0.13	-0.73	-0.28	-0.55	-0.41	-0.37	-0.4	-0.07	-0.51	-0.32	-0.44	-0.41	-0.42	-0.48	-0.49	-0.46	-0.48	-0.48	-0.48	-0.44	-0.49	-0.48	-0.44	-0.45	-0.49	-0.48	-0.48	-0.47	-0.47	-0.51	-0.46
GAO_LARGE_INTESTINE_ADULT_CJ_IMMUNE_CELLS	2.13	2.9	0.58	1.48	1.19	3.48	0.08	2.03	2.33	1.24	2.4	1.19	4.88	0.62	1.85	1.47	2.05	-0.13	-0.17	-0.13	-0.05	-0.44	-0.18	-0.34	-0.23	-0.07	-0.45	-0.37	-0.4	-0.38	-0.45	-0.47	-0.5	-0.44	-0.43	-0.45	-0.45	-0.46	-0.45	-0.42	-0.47	-0.42	-0.49	-0.47	-0.44	-0.53	-0.47	-0.45	-0.4
HAY_BONE_MARROW_PLATELET	1.46	2.25	-0.12	1.38	0.81	2.69	0.03	1.37	1.81	1.4	1.84	1.28	4.92	1.09	0.79	1.69	1.06	-0.41	-0.48	-0.65	-0.35	-0.56	-0.31	-0.34	-0.46	-0.29	-0.5	-0.36	-0.46	-0.43	-0.47	-0.45	-0.47	-0.45	-0.43	-0.42	-0.42	-0.5	-0.43	-0.47	-0.48	-0.45	-0.5	-0.45	-0.47	-0.44	-0.46	-0.37	-0.44
MURARO_PANCREAS_ENDOTHELIAL_CELL	2.54	3.08	0.55	1.79	0.92	2.05	0.73	1.63	1.54	0.89	2.1	1.47	3.74	1.01	1.43	2.17	1.8	0.02	-0.24	-0.17	-0.1	-0.47	-0.32	-0.38	-0.25	0	-0.42	-0.33	-0.4	-0.38	-0.46	-0.45	-0.46	-0.4	-0.49	-0.42	-0.46	-0.43	-0.43	-0.44	-0.45	-0.39	-0.46	-0.42	-0.44	-0.47	-0.39	-0.44	-0.43
GAUTAM_EYE_CORNEA_MONOCYTES	1.23	2.73	0.63	1.18	0.85	1.97	0.04	0.71	1.59	1.15	1.41	2.53	4.52	1.46	1.91	0.88	1.69	-0.11	-0.25	-0.08	-0.01	-0.46	-0.37	-0.31	-0.18	-0.03	-0.45	-0.49	-0.28	-0.35	-0.39	-0.47	-0.42	-0.35	-0.41	-0.4	-0.4	-0.4	-0.41	-0.38	-0.46	-0.41	-0.41	-0.41	-0.38	-0.44	-0.36	-0.46	-0.43
CUI_DEVELOPING_HEART_C8_MACROPHAGE	2.01	2.08	1.4	1.83	0.31	2.08	0.12	1.14	2.59	2.22	1.99	3.82	6	1.04	2.85	2.63	1.86	0.04	-0.09	-0.18	-0.15	-0.45	-0.24	-0.35	-0.31	-0.2	-0.17	-0.29	-0.16	-0.38	-0.45	-0.47	-0.43	-0.41	-0.45	-0.51	-0.46	-0.39	-0.4	-0.39	-0.48	-0.39	-0.47	-0.43	-0.42	-0.49	-0.45	-0.45	-0.43
FAN_OVARY_CL17_PUTATIVE_APOPTOTIC_SMOOTH_MUSCLE_CELL	1.67	2.33	1.04	1.93	1.04	1.7	0.3	1.77	3.51	1.85	2.53	4.2	5.36	1.76	2.34	2.81	1.81	0.03	-0.22	-0.52	-0.23	-0.55	-0.44	-0.36	-0.41	-0.32	-0.4	-0.32	-0.38	-0.4	-0.53	-0.59	-0.49	-0.41	-0.43	-0.4	-0.48	-0.38	-0.37	-0.36	-0.43	-0.36	-0.43	-0.38	-0.38	-0.43	-0.44	-0.4	-0.39
FAN_OVARY_CL6_PUTATIVE_EARLY_ATRETIC_FOLLICLE_THECAL_CELL_2	1.6	2.54	0.08	1.81	0.82	1.84	-0.12	1.48	2.77	1.47	2.31	3.07	5.12	0.87	1.48	2.4	2.44	0.39	0.35	0	0.12	-0.51	-0.36	-0.37	-0.38	-0.24	-0.51	-0.34	-0.32	-0.41	-0.43	-0.36	-0.51	-0.43	-0.42	-0.49	-0.49	-0.44	-0.42	-0.45	-0.46	-0.42	-0.45	-0.44	-0.47	-0.46	-0.47	-0.44	-0.42
RUBENSTEIN_SKELETAL_MUSCLE_PERICYTES	1.97	2.06	-0.24	1.59	0.87	1.48	0.18	1.19	2.58	1.27	1.8	2.58	4.39	1.71	1.35	2.44	1.15	-0.34	-0.43	0.05	-0.31	-0.53	-0.39	-0.44	-0.36	-0.33	-0.53	-0.37	-0.39	-0.42	-0.41	-0.5	-0.45	-0.47	-0.49	-0.5	-0.49	-0.48	-0.45	-0.5	-0.45	-0.43	-0.49	-0.46	-0.46	-0.49	-0.48	-0.45	-0.44
DURANTE_ADULT_OLFACTORY_NEUROEPITHELIUM_FIBROBLASTS_STROMAL_CELLS	0.99	2.08	0.8	1.94	1.26	2.12	-0.02	1.97	3.74	1.34	2.71	2.79	6.51	1.24	2.59	3.08	2.57	-0.14	-0.37	-0.58	-0.21	-0.45	-0.33	-0.05	-0.21	0.1	-0.39	-0.35	-0.35	-0.38	-0.36	-0.36	-0.49	-0.36	-0.4	-0.4	-0.43	-0.42	-0.43	-0.38	-0.39	-0.38	-0.41	-0.4	-0.39	-0.4	-0.4	-0.39	-0.33
TRAVAGLINI_LUNG_CAPILLARY_INTERMEDIATE_1_CELL	1.22	1.71	1.14	2.16	0.79	1.54	0.1	1.54	3.39	1.45	2.91	2.27	5.37	1.52	1.88	1.97	1.3	0.4	-0.29	-0.32	-0.19	-0.47	-0.39	-0.4	-0.36	-0.11	-0.46	-0.44	-0.43	-0.46	-0.48	-0.48	-0.5	-0.49	-0.48	-0.49	-0.48	-0.48	-0.45	-0.49	-0.49	-0.5	-0.5	-0.46	-0.5	-0.51	-0.47	-0.51	-0.46
HAY_BONE_MARROW_STROMAL	2.01	2.69	0.99	1.56	1.11	2.4	-0.1	1.39	3.65	0.96	2.46	1.47	5.08	1.47	2.05	2.37	1.74	-0.08	-0.18	-0.35	-0.05	-0.51	-0.24	-0.29	-0.34	-0.26	-0.45	-0.32	-0.38	-0.41	-0.47	-0.42	-0.45	-0.44	-0.41	-0.44	-0.45	-0.47	-0.43	-0.42	-0.47	-0.43	-0.47	-0.43	-0.45	-0.45	-0.43	-0.43	-0.42
GAO_LARGE_INTESTINE_ADULT_CI_MESENCHYMAL_CELLS	1.65	2.22	1.42	2.49	0.92	1.46	-0.02	1.27	2.13	1.76	3.34	2.09	5.15	1.55	2.1	2.36	2.34	0.04	-0.21	-0.04	0.68	-0.44	-0.42	-0.36	-0.24	0.06	-0.47	-0.27	-0.32	-0.44	-0.48	-0.4	-0.46	-0.42	-0.52	-0.5	-0.48	-0.49	-0.48	-0.47	-0.51	-0.44	-0.52	-0.47	-0.47	-0.5	-0.47	-0.5	-0.49
BUSSLINGER_DUODENAL_IMMUNE_CELLS	1.44	2.3	0.95	2.86	0.83	3.56	0.17	1.86	1.33	1.81	3.23	2.94	7.01	1.26	1.98	3.17	2.03	-0.04	-0.19	0.15	-0.05	-0.57	-0.44	-0.31	-0.36	-0.16	-0.15	-0.2	-0.24	-0.38	-0.31	-0.56	-0.35	-0.33	-0.41	-0.41	-0.41	-0.31	-0.4	-0.41	-0.42	-0.34	-0.36	-0.36	-0.34	-0.39	-0.39	-0.32	-0.34
BUSSLINGER_GASTRIC_IMMUNE_CELLS	1.57	2.13	0.58	3.21	0.83	4.23	0.48	1.79	2.1	1.79	3.7	2.72	7.53	1.64	1.84	2.84	1.91	0.26	-0.01	0.11	0.31	-0.5	-0.56	-0.3	-0.29	-0.09	-0.03	-0.33	-0.19	-0.4	-0.37	-0.53	-0.41	-0.42	-0.45	-0.49	-0.45	-0.4	-0.42	-0.39	-0.48	-0.35	-0.4	-0.37	-0.34	-0.5	-0.44	-0.38	-0.31
TRAVAGLINI_LUNG_PROXIMAL_BASAL_CELL	1.14	1.99	0.69	2.21	0.93	3.96	0.12	0.98	0.9	0.9	3.59	2.72	6.58	1.09	1.39	1.95	2.14	0.05	-0.17	0.23	-0.15	-0.69	-0.41	-0.43	-0.34	0.01	-0.27	-0.37	-0.41	-0.3	-0.38	-0.61	-0.43	-0.28	-0.46	-0.47	-0.44	-0.48	-0.46	-0.38	-0.5	-0.43	-0.47	-0.44	-0.45	-0.49	-0.47	-0.38	-0.35
TRAVAGLINI_LUNG_PROXIMAL_CILIATED_CELL	1.78	2.6	0.44	2.99	1.27	4.53	0.41	2.31	0.92	1.19	3.36	2.73	7.76	1.71	1.95	2.3	2.22	0.14	-0.02	-0.12	0.27	-0.36	-0.26	-0.47	-0.26	0.16	-0.23	-0.2	-0.14	-0.32	-0.57	-0.54	-0.37	-0.45	-0.43	-0.47	-0.4	-0.48	-0.42	-0.43	-0.49	-0.4	-0.49	-0.41	-0.43	-0.49	-0.48	-0.47	-0.45
GAUTAM_EYE_CORNEA_FIBROBLASTS	1.18	2.1	0.71	2.19	0.93	2.42	0.07	0.67	0.45	1.4	2.07	2.45	5.53	1	1.33	1.58	1.12	-0.17	-0.19	-0.26	0.3	-0.5	-0.52	-0.31	-0.25	-0.09	-0.17	-0.27	-0.19	-0.33	-0.45	-0.47	-0.36	-0.34	-0.41	-0.49	-0.46	-0.43	-0.37	-0.4	-0.43	-0.42	-0.42	-0.39	-0.33	-0.45	-0.44	-0.4	-0.4
GAUTAM_EYE_CHOROID_SCLERA_MELANOCYTES	1.2	1.66	-0.05	0.72	0.26	2.71	-0.07	0.57	0.45	0.9	2.38	2.34	4.86	0.49	0.77	1.58	0.95	-0.02	-0.09	-0.2	-0.23	-0.51	-0.59	-0.5	-0.36	-0.32	-0.33	-0.39	-0.41	-0.32	-0.34	-0.6	-0.43	-0.43	-0.55	-0.47	-0.51	-0.42	-0.43	-0.39	-0.54	-0.49	-0.48	-0.49	-0.46	-0.45	-0.59	-0.5	-0.43
BUSSLINGER_ESOPHAGEAL_DENDRITIC_CELLS	1.22	1.99	1.04	1.77	0.66	3.26	0.02	1.74	2.01	1.94	3.97	2.66	6.28	2.31	1.77	3.29	2.12	0.18	-0.15	-0.34	0.29	-0.4	-0.14	-0.31	-0.31	-0.12	-0.37	-0.32	-0.15	-0.42	-0.53	-0.48	-0.46	-0.4	-0.45	-0.51	-0.48	-0.41	-0.46	-0.4	-0.47	-0.44	-0.43	-0.45	-0.45	-0.49	-0.43	-0.44	-0.48
HAY_BONE_MARROW_NK_CELLS	0.6	1.46	1.13	2.1	0.17	2.53	-0.19	0.98	1.26	0.9	3.35	1.86	6.14	1.2	2.06	2.79	1.93	-0.19	-0.27	-0.75	-0.26	-0.64	-0.49	-0.4	-0.43	-0.21	-0.46	-0.31	-0.43	-0.38	-0.37	-0.45	-0.43	-0.46	-0.36	-0.53	-0.47	-0.4	-0.41	-0.45	-0.42	-0.39	-0.5	-0.43	-0.4	-0.44	-0.41	-0.45	-0.34
FAN_OVARY_CL1_GPRC5A_TNFRS12A_HIGH_SELECTABLE_FOLLICLE_STROMAL_CELL	0.6	1.94	0.58	2.99	0.99	3.18	0.26	1.32	1.89	0.79	4.2	2.11	6.31	1.58	1.58	2.68	2.89	0.4	-0.05	0.03	0.19	-0.54	-0.53	-0.41	-0.27	-0.06	-0.49	-0.63	-0.4	-0.35	-0.43	-0.43	-0.38	-0.27	-0.37	-0.4	-0.43	-0.34	-0.39	-0.32	-0.44	-0.35	-0.36	-0.33	-0.35	-0.33	-0.44	-0.37	-0.33
AIZARANI_LIVER_C25_KUPFFER_CELLS_4	1.75	1.95	0.42	2.03	0.6	3.53	0.18	1.31	1.94	0.28	3.55	2.45	6.7	0.98	1.95	2.95	1.95	0.36	-0.1	0.16	-0.08	-0.43	-0.21	-0.32	-0.34	-0.24	-0.53	-0.07	-0.33	-0.38	-0.34	-0.41	-0.47	-0.34	-0.43	-0.44	-0.35	-0.37	-0.35	-0.36	-0.44	-0.4	-0.44	-0.42	-0.38	-0.44	-0.39	-0.39	-0.43
AIZARANI_LIVER_C2_KUPFFER_CELLS_1	1.8	1.83	0.69	1.63	0.64	2.62	0.18	1.46	2.33	0.84	3.3	3.15	6.44	1.26	1.94	3.11	1.96	0.28	-0.12	0.12	-0.08	-0.46	-0.21	-0.41	-0.34	-0.17	-0.52	-0.29	-0.27	-0.38	-0.51	-0.41	-0.52	-0.37	-0.42	-0.51	-0.44	-0.39	-0.42	-0.4	-0.48	-0.42	-0.49	-0.46	-0.48	-0.5	-0.44	-0.47	-0.46
FAN_EMBRYONIC_CTX_OLIG	0.93	1.93	0.35	2.59	0.88	3.23	0.02	1.48	2.46	1.34	3.25	2.43	7.48	1.61	2.37	2.16	2.03	-0.2	-0.4	-0.59	-0.23	-0.48	-0.31	-0.37	-0.2	-0.22	-0.37	-0.41	-0.45	-0.43	-0.49	-0.51	-0.52	-0.43	-0.46	-0.43	-0.45	-0.44	-0.45	-0.46	-0.5	-0.44	-0.43	-0.45	-0.44	-0.45	-0.46	-0.44	-0.43
MURARO_PANCREAS_DUCTAL_CELL	1.43	1.97	0.43	2.11	0.8	3.12	0.12	1.57	2.41	1.03	3.94	2.88	6.24	1.65	2.5	2.61	1.51	0.49	0.17	-0.14	-0.16	-0.6	-0.3	-0.47	-0.36	-0.26	-0.46	-0.31	-0.42	-0.4	-0.5	-0.47	-0.44	-0.4	-0.4	-0.43	-0.46	-0.41	-0.38	-0.44	-0.44	-0.4	-0.41	-0.39	-0.4	-0.45	-0.43	-0.42	-0.4
TRAVAGLINI_LUNG_PLATELET_MEGAKARYOCYTE_CELL	1.43	1.7	0.32	1.95	0.91	2.28	0.17	1.2	2.26	1.2	2.96	2.25	5.37	1.26	2.21	2.19	1.72	-0.24	-0.42	-0.42	-0.37	-0.4	-0.22	-0.5	-0.43	-0.2	-0.31	-0.33	-0.43	-0.41	-0.53	-0.51	-0.46	-0.45	-0.43	-0.52	-0.45	-0.47	-0.43	-0.47	-0.46	-0.43	-0.47	-0.46	-0.46	-0.49	-0.45	-0.45	-0.45
MURARO_PANCREAS_ACINAR_CELL	1.51	2.35	0.5	1.51	1.01	3.05	0.23	1.22	2.51	0.97	2.9	2.88	5.42	1.52	2.07	2.63	2.43	-0.15	-0.16	-0.01	-0.1	-0.6	-0.5	-0.32	-0.31	-0.08	-0.11	-0.33	-0.37	-0.35	-0.46	-0.54	-0.48	-0.4	-0.48	-0.48	-0.47	-0.46	-0.44	-0.53	-0.51	-0.39	-0.48	-0.42	-0.45	-0.51	-0.5	-0.49	-0.44
TRAVAGLINI_LUNG_BASOPHIL_MAST_1_CELL	1.5	1.99	0.29	3.17	1.11	3.46	-0.12	1.95	1.8	1.25	3.98	2.73	6.04	0.68	2.11	3.02	2.06	0	-0.06	0.55	-0.07	-0.45	-0.17	-0.42	-0.41	-0.32	-0.5	-0.34	-0.34	-0.39	-0.43	-0.44	-0.42	-0.38	-0.47	-0.42	-0.44	-0.44	-0.46	-0.48	-0.47	-0.46	-0.47	-0.44	-0.48	-0.49	-0.47	-0.47	-0.49
TRAVAGLINI_LUNG_BASOPHIL_MAST_2_CELL	1.23	1.93	0.46	2.57	1.21	3.7	0.07	2.18	2.26	1.61	3.46	3.15	6.11	0.91	2.45	3.33	2.26	0.03	-0.13	-0.1	-0.13	-0.57	-0.4	-0.37	-0.36	-0.34	-0.31	-0.29	-0.31	-0.4	-0.45	-0.49	-0.49	-0.41	-0.44	-0.51	-0.45	-0.43	-0.38	-0.44	-0.49	-0.41	-0.48	-0.43	-0.45	-0.49	-0.51	-0.45	-0.45
AIZARANI_LIVER_C6_KUPFFER_CELLS_2	1.1	2.36	0.72	2.98	0.33	3.09	0.16	1.32	2.22	1.31	2.09	3	4.92	0.4	3.13	2.07	1.23	-0.07	-0.25	0.06	-0.17	-0.48	-0.41	-0.42	-0.27	-0.24	-0.24	-0.44	-0.26	-0.37	-0.43	-0.39	-0.47	-0.38	-0.33	-0.47	-0.42	-0.37	-0.41	-0.48	-0.49	-0.42	-0.48	-0.45	-0.44	-0.46	-0.44	-0.44	-0.49
FAN_OVARY_CL9_PUTATIVE_APOPTOTIC_ENDOTHELIAL_CELL	2.03	2.25	0.51	2.71	0.35	3.3	0.03	1.43	1.5	1.37	3.98	3.69	5.92	1.26	1.73	2.7	1.54	-0.14	-0.27	-0.27	-0.23	-0.5	-0.6	-0.41	-0.22	-0.12	-0.53	-0.47	-0.41	-0.41	-0.44	-0.51	-0.42	-0.36	-0.44	-0.45	-0.48	-0.42	-0.39	-0.43	-0.46	-0.36	-0.43	-0.43	-0.42	-0.45	-0.44	-0.41	-0.37
RUBENSTEIN_SKELETAL_MUSCLE_NK_CELLS	1.46	2.34	0.58	2.48	0.02	1.74	-0.16	0.89	0.95	1.49	2.29	2.95	4.91	0.8	1.66	1.97	1.44	-0.05	-0.08	-0.43	-0.26	-0.52	-0.53	-0.33	-0.4	-0.26	-0.32	-0.41	-0.31	-0.33	-0.37	-0.41	-0.43	-0.38	-0.45	-0.5	-0.42	-0.34	-0.35	-0.45	-0.4	-0.39	-0.4	-0.36	-0.39	-0.45	-0.45	-0.36	-0.32
FAN_EMBRYONIC_CTX_BIG_GROUPS_MICROGLIA	1.22	2.31	0.13	1.83	0.19	1.59	0.25	1.13	1.61	1.95	2.3	3.2	4.31	1.24	1.67	1.79	1.31	-0.18	-0.13	-0.04	-0.22	-0.52	-0.38	-0.45	-0.32	-0.26	-0.4	-0.39	-0.24	-0.38	-0.5	-0.44	-0.42	-0.43	-0.4	-0.48	-0.46	-0.43	-0.44	-0.44	-0.49	-0.44	-0.52	-0.43	-0.48	-0.46	-0.49	-0.45	-0.45
HU_FETAL_RETINA_MICROGLIA	1.65	2.22	0.75	2.33	0.59	1.96	0.32	1.53	2.02	1.74	2.68	2.91	6.24	1.55	2.19	2.49	1.67	-0.02	-0.21	-0.35	-0.2	-0.53	-0.26	-0.43	-0.21	-0.18	-0.36	-0.32	-0.29	-0.39	-0.52	-0.43	-0.44	-0.46	-0.47	-0.47	-0.45	-0.41	-0.41	-0.44	-0.49	-0.45	-0.48	-0.42	-0.45	-0.51	-0.46	-0.42	-0.47
MANNO_MIDBRAIN_NEUROTYPES_HMGL	1.8	2.35	0.43	2.02	0.34	1.47	0.18	1.18	1.97	1.52	2.47	2.48	5.61	1.2	2.58	1.47	1.09	-0.12	-0.22	-0.16	-0.3	-0.5	-0.31	-0.42	-0.25	-0.21	-0.43	-0.33	-0.27	-0.37	-0.59	-0.41	-0.47	-0.43	-0.39	-0.49	-0.44	-0.45	-0.42	-0.46	-0.5	-0.42	-0.51	-0.42	-0.46	-0.48	-0.47	-0.45	-0.44
ZHONG_PFC_MAJOR_TYPES_MICROGLIA	1.26	2.33	0.11	2.22	0.18	2.11	0.11	0.89	1.7	1.77	2.99	2.87	5.44	1.27	2.23	1.68	1.16	0.17	-0.01	-0.35	-0.17	-0.56	-0.29	-0.33	-0.31	-0.18	-0.44	-0.33	-0.24	-0.38	-0.44	-0.37	-0.44	-0.38	-0.34	-0.43	-0.45	-0.37	-0.35	-0.4	-0.44	-0.35	-0.47	-0.39	-0.42	-0.43	-0.44	-0.46	-0.36
CUI_DEVELOPING_HEART_TRABECULAR_ATRIAL_CARDIOMYOCYTE	1.45	2.31	-0.01	2.51	0.65	2.87	-0.06	1.99	0.74	0.75	2	1.61	3.94	1.26	1.91	2.4	0.82	-0.16	-0.07	-0.36	-0.07	-0.44	-0.34	-0.44	-0.32	-0.28	-0.41	-0.3	-0.4	-0.38	-0.42	-0.4	-0.38	-0.5	-0.46	-0.44	-0.47	-0.44	-0.45	-0.41	-0.44	-0.47	-0.48	-0.43	-0.44	-0.42	-0.52	-0.43	-0.49
GAUTAM_EYE_CHOROID_SCLERA_FIBROBLASTS	2.18	2.8	0.26	2.47	0.77	2.91	0.97	1.87	0.84	0.73	1.96	2.22	4.44	1.26	1.93	2.47	1.69	-0.21	-0.31	0.19	0.41	-0.15	-0.17	0.29	-0.34	-0.22	-0.42	-0.25	-0.37	-0.4	-0.48	-0.36	-0.4	-0.43	-0.42	-0.45	-0.41	-0.45	-0.41	-0.41	-0.42	-0.42	-0.47	-0.43	-0.44	-0.43	-0.43	-0.42	-0.4
FAN_OVARY_CL3_MATURE_CUMULUS_GRANULOSA_CELL_1	1.94	2.72	0.61	2.03	0.9	4.05	0.23	1.85	1.38	0.88	2.86	1	3.7	1.17	1.74	1.79	1.72	0.03	-0.13	-0.11	0.73	-0.27	-0.37	-0.39	-0.4	-0.25	-0.17	-0.32	-0.44	-0.39	-0.44	-0.52	-0.47	-0.49	-0.51	-0.5	-0.48	-0.49	-0.44	-0.43	-0.52	-0.45	-0.52	-0.47	-0.46	-0.55	-0.51	-0.47	-0.44
FAN_OVARY_CL8_MATURE_CUMULUS_GRANULOSA_CELL_2	2.12	2.87	0.03	1.95	0.88	3.53	0.34	1.74	1.2	0.47	2.79	1.83	4.74	1.47	1.35	2.43	1.4	0.04	-0.25	-0.13	0.28	-0.48	-0.35	-0.43	-0.3	-0.23	-0.25	-0.34	-0.43	-0.29	-0.39	-0.53	-0.38	-0.48	-0.5	-0.53	-0.47	-0.51	-0.45	-0.47	-0.5	-0.46	-0.51	-0.44	-0.47	-0.53	-0.51	-0.43	-0.46
AIZARANI_LIVER_C28_NK_NKT_CELLS_6	2.8	2.44	1.12	2.86	1.38	3.13	0.13	1.72	1.96	1.29	3.16	2.09	4.75	1.02	2.07	2.07	1.91	0.42	0.04	-0.11	0.2	-0.43	-0.35	-0.48	-0.07	0.13	-0.33	-0.28	-0.31	-0.38	-0.42	-0.43	-0.36	-0.41	-0.43	-0.47	-0.49	-0.34	-0.46	-0.4	-0.42	-0.42	-0.44	-0.4	-0.43	-0.47	-0.39	-0.33	-0.42
LAKE_ADULT_KIDNEY_C17_COLLECTING_SYSTEM_PCS_STRESSED_DISSOC_SUBSET	1.78	2.35	0.88	2.81	0.57	2.95	0.66	2.16	2.58	1.07	3.6	1.99	3.99	0.98	1.91	2.09	1.88	0.1	-0.22	0.39	-0.04	-0.47	-0.62	-0.49	-0.46	-0.34	-0.28	-0.53	-0.39	-0.39	-0.43	-0.52	-0.49	-0.5	-0.49	-0.48	-0.52	-0.43	-0.4	-0.48	-0.48	-0.45	-0.52	-0.45	-0.46	-0.44	-0.49	-0.43	-0.46
FAN_OVARY_CL18_B_LYMPHOCYTE	1.74	2.78	0.41	1.72	0.34	1.86	0.06	0.95	0.92	0.94	2.38	2.19	3.17	1.15	1.53	1.63	1	-0.2	-0.21	-0.29	0.13	-0.39	-0.45	-0.38	-0.28	-0.16	-0.56	-0.31	-0.3	-0.31	-0.33	-0.6	-0.41	-0.38	-0.48	-0.45	-0.46	-0.47	-0.46	-0.4	-0.51	-0.39	-0.43	-0.42	-0.4	-0.49	-0.5	-0.39	-0.42
FAN_OVARY_CL11_MURAL_GRANULOSA_CELL	1.87	2.71	0.32	1.86	0.78	2.79	0.06	1.08	2.1	0.76	2.68	2.46	3.77	1.18	1.52	2.16	1.88	-0.02	-0.14	-0.33	0.44	-0.35	-0.41	-0.45	-0.37	-0.25	-0.22	-0.37	-0.43	-0.4	-0.44	-0.5	-0.42	-0.37	-0.44	-0.45	-0.44	-0.43	-0.41	-0.41	-0.45	-0.41	-0.43	-0.41	-0.39	-0.44	-0.44	-0.43	-0.42
FAN_OVARY_CL15_SMALL_ANTRAL_FOLLICLE_GRANULOSA_CELL	1.53	2.43	0.19	1.97	0.7	2.68	0.12	1.37	2.27	0.94	2.98	2.51	4.07	1.61	1.38	2.23	1.47	0.32	-0.04	-0.3	0.36	-0.46	-0.5	-0.47	-0.38	-0.31	-0.31	-0.32	-0.38	-0.37	-0.39	-0.49	-0.37	-0.41	-0.44	-0.46	-0.43	-0.4	-0.36	-0.36	-0.47	-0.38	-0.44	-0.42	-0.41	-0.52	-0.46	-0.43	-0.41
TRAVAGLINI_LUNG_CILIATED_CELL	1.86	2.72	0.17	2.87	1.14	3.77	0.94	2.77	2.1	1.4	3.8	3.36	6.12	2.25	2.46	3.04	2.31	0.2	-0.1	-0.24	0.65	-0.21	-0.12	-0.29	-0.31	0.16	-0.31	-0.24	-0.23	-0.41	-0.53	-0.52	-0.39	-0.39	-0.41	-0.45	-0.42	-0.44	-0.4	-0.43	-0.49	-0.4	-0.45	-0.42	-0.41	-0.5	-0.44	-0.43	-0.42
LAKE_ADULT_KIDNEY_C6_PROXIMAL_TUBULE_EPITHELIAL_CELLS_FIBRINOGEN_POS_S3	1.34	2.26	0.87	1.81	0.48	2.69	0.27	1.76	1.53	0.58	1.62	2.16	4.06	0.93	1.01	1.37	2	-0.28	-0.33	-0.37	-0.21	-0.52	-0.53	-0.38	-0.43	-0.28	-0.33	-0.4	-0.45	-0.4	-0.52	-0.46	-0.52	-0.48	-0.47	-0.51	-0.51	-0.47	-0.47	-0.51	-0.53	-0.47	-0.53	-0.5	-0.5	-0.57	-0.52	-0.47	-0.5
AIZARANI_LIVER_C11_HEPATOCYTES_1	1.41	1.9	0.58	1.78	0.93	2.41	0.56	1.61	2.24	0.04	2.36	1.72	2.94	1.08	2.02	2.28	1.69	-0.12	-0.29	-0.25	0.08	-0.5	-0.33	-0.39	-0.45	-0.09	-0.44	-0.48	-0.47	-0.42	-0.64	-0.64	-0.53	-0.51	-0.5	-0.56	-0.61	-0.58	-0.54	-0.59	-0.61	-0.59	-0.55	-0.56	-0.57	-0.59	-0.61	-0.57	-0.5
DURANTE_ADULT_OLFACTORY_NEUROEPITHELIUM_OLFACTORY_ENSHEATHING_GLIA	1.17	2.17	0.26	1.76	0.79	1.84	0.52	1.5	1.44	0.92	1.74	2.19	3.73	0.93	1.79	3.06	1.71	0.27	-0.13	-0.44	-0.32	-0.56	-0.34	-0.27	-0.45	-0.16	-0.48	-0.44	-0.38	-0.42	-0.41	-0.45	-0.56	-0.4	-0.5	-0.47	-0.53	-0.43	-0.42	-0.5	-0.48	-0.45	-0.49	-0.46	-0.5	-0.51	-0.47	-0.45	-0.4
ZHONG_PFC_MAJOR_TYPES_ASTROCYTES	0.73	2.21	1.24	1.47	0.57	2.34	0.26	1.77	1.52	0.79	2.67	2.04	4.57	1.72	2.47	3.39	1.88	-0.08	-0.35	-0.3	-0.15	-0.56	-0.32	-0.32	-0.4	-0.22	-0.48	-0.38	-0.37	-0.42	-0.45	-0.41	-0.47	-0.42	-0.42	-0.41	-0.52	-0.47	-0.47	-0.51	-0.48	-0.45	-0.49	-0.44	-0.49	-0.47	-0.45	-0.51	-0.42
ZHONG_PFC_C9_ORG_OTHER	1.72	2.5	1.06	2.31	0.91	2.88	0.4	2.54	2.01	1.04	2.01	1.62	3.95	1.26	1.83	3.52	1.15	-0.33	-0.42	-0.33	-0.2	-0.48	-0.32	-0.43	-0.35	-0.25	-0.53	-0.11	-0.46	-0.43	-0.39	-0.46	-0.47	-0.47	-0.49	-0.5	-0.44	-0.5	-0.46	-0.5	-0.48	-0.48	-0.48	-0.47	-0.48	-0.51	-0.5	-0.48	-0.53
DESCARTES_MAIN_FETAL_TROPHOBLAST_GIANT_CELLS	1.7	2.34	0.29	0.83	0.32	1.86	-0.32	2.05	0.96	1.02	1.98	2.28	5.85	1.49	1.03	1.71	0.12	-0.25	-0.45	-0.46	-0.2	-0.51	-0.47	-0.5	-0.29	-0.29	-0.6	-0.52	-0.47	-0.42	-0.56	-0.49	-0.53	-0.42	-0.46	-0.51	-0.51	-0.5	-0.52	-0.53	-0.52	-0.52	-0.51	-0.5	-0.53	-0.52	-0.51	-0.47	-0.49
TRAVAGLINI_LUNG_MUCOUS_CELL	1.38	2.12	0.84	0.5	0.57	2.38	0.26	2.23	1.84	1	2.43	3.28	6.21	0.39	1.94	1.61	1.06	-0.15	-0.29	-0.23	-0.21	-0.55	-0.7	-0.37	-0.39	0.05	-0.49	-0.66	-0.45	-0.42	-0.46	-0.3	-0.56	-0.38	-0.44	-0.5	-0.62	-0.4	-0.44	-0.5	-0.5	-0.5	-0.44	-0.51	-0.49	-0.47	-0.43	-0.47	-0.43
HAY_BONE_MARROW_DENDRITIC_CELL	1.2	2.4	-0.13	2.05	0.52	0.69	0.06	1.32	0.57	1	2.48	2.37	5.07	1.07	3.25	1.89	1.61	-0.28	-0.33	-0.16	-0.24	-0.32	-0.31	-0.26	-0.38	-0.24	-0.3	0.51	-0.29	-0.37	-0.39	-0.45	-0.4	-0.39	-0.38	-0.4	-0.41	-0.43	-0.39	-0.36	-0.41	-0.4	-0.41	-0.38	-0.37	-0.44	-0.37	-0.4	-0.4
HAY_BONE_MARROW_PLASMA_CELL	1	1.19	0.02	0.86	0.06	0.98	-0.23	0.4	0.21	0.46	0.89	1.1	2.64	0.29	1.24	0.9	0.23	-0.17	-0.29	-0.17	-0.27	-0.48	-0.57	0.34	-0.34	-0.34	-0.42	-0.26	-0.38	-0.38	-0.41	-0.46	-0.34	-0.41	-0.46	-0.48	-0.48	-0.47	-0.45	-0.41	-0.45	-0.46	-0.45	-0.43	-0.47	-0.42	-0.44	-0.45	-0.45
TRAVAGLINI_LUNG_PLASMACYTOID_DENDRITIC_CELL	1.2	2.58	0.05	2.32	0.39	2.37	0.07	0.37	0.59	0.81	2.07	1.83	4.66	0.89	2.7	1.2	1.44	-0.24	-0.28	-0.26	-0.13	-0.35	-0.45	-0.25	-0.36	-0.24	-0.46	-0.41	-0.36	-0.37	-0.39	-0.41	-0.44	-0.35	-0.43	-0.45	-0.41	-0.43	-0.38	-0.42	-0.43	-0.42	-0.4	-0.41	-0.41	-0.44	-0.42	-0.42	-0.42
TRAVAGLINI_LUNG_GOBLET_CELL	1.75	3	0.19	1.22	-0.16	1.15	-0.11	0.6	1.25	0.8	2.27	2.04	4.38	0.35	1.88	2.11	1.06	0.03	-0.24	-0.39	-0.2	-0.44	-0.43	-0.12	-0.4	-0.29	-0.34	-0.41	-0.34	-0.38	-0.38	-0.35	-0.41	-0.4	-0.41	-0.41	-0.42	-0.41	-0.37	-0.44	-0.44	-0.42	-0.41	-0.44	-0.42	-0.42	-0.41	-0.43	-0.41
BUSSLINGER_DUODENAL_EARLY_IMMATURE_ENTEROCYTES	1.16	0.62	0.02	2.43	0.61	1.66	-0.09	0.63	1.78	0.54	4.41	2.17	4.63	0.64	1.36	3.14	1.06	0.09	-0.21	-0.78	0	-0.61	-0.56	-0.55	-0.23	-0.12	-0.48	-0.5	-0.4	-0.35	-0.6	-0.57	-0.61	-0.54	-0.61	-0.66	-0.55	-0.63	-0.57	-0.64	-0.61	-0.56	-0.62	-0.54	-0.58	-0.62	-0.57	-0.58	-0.57
BUSSLINGER_GASTRIC_METALLOTHIONEIN_CELLS	1.05	1.54	0.14	2.03	1.26	1.58	-0.07	1.29	2.54	1.03	4.33	2.29	5.26	0.89	1.84	3.6	1.59	-0.06	-0.42	-0.36	0.18	-0.53	-0.39	-0.47	-0.4	-0.12	-0.5	-0.35	-0.54	-0.41	-0.51	-0.51	-0.48	-0.43	-0.44	-0.5	-0.53	-0.46	-0.45	-0.48	-0.54	-0.48	-0.5	-0.47	-0.45	-0.54	-0.54	-0.49	-0.51
AIZARANI_LIVER_C18_NK_NKT_CELLS_5	0.45	1.2	1.12	2.25	0.33	1.74	-0.05	1.05	1.43	1.31	3.79	3.36	7.2	0.59	1.74	3.76	2.3	0.66	0.07	0.2	-0.1	-0.42	-0.31	-0.31	-0.31	-0.05	-0.46	-0.12	-0.33	-0.31	-0.46	-0.39	-0.52	-0.22	-0.43	-0.53	-0.39	-0.34	-0.44	-0.39	-0.46	-0.41	-0.5	-0.48	-0.45	-0.48	-0.42	-0.49	-0.42
DESCARTES_FETAL_INTESTINE_INTESTINAL_EPITHELIAL_CELLS	0.61	1.56	0.1	2.73	1.11	1.92	-0.01	0.63	0.75	2.15	3.61	1.99	5.68	0.52	1.44	3.05	1.09	0.53	0.18	-0.04	-0.28	-0.42	-0.48	-0.26	-0.37	-0.02	-0.26	-0.21	-0.13	-0.36	-0.41	-0.37	-0.34	-0.38	-0.38	-0.34	-0.33	-0.38	-0.34	-0.39	-0.45	-0.37	-0.41	-0.34	-0.41	-0.41	-0.42	-0.36	-0.43
DESCARTES_MAIN_FETAL_CORNEAL_AND_CONJUNCTIVAL_EPITHELIAL_CELLS	0.01	1.78	0.48	1.8	0.27	1.74	-0.14	0.54	1.59	1.89	3.93	3.57	5.09	1.03	1.38	2.01	1.35	-0.01	0.02	-0.06	0.11	-0.53	-0.19	-0.37	-0.1	-0.19	-0.68	-0.49	-0.16	-0.23	-0.53	-0.41	-0.55	-0.34	-0.32	-0.63	-0.34	-0.41	-0.45	-0.35	-0.49	-0.4	-0.48	-0.5	-0.52	-0.46	-0.5	-0.48	-0.42
AIZARANI_LIVER_C29_MVECS_2	0.6	1.51	0.95	1.22	1	3.47	0.94	1.99	2.82	1.84	3.93	3.3	8.15	2.13	1.93	2.13	2.35	0.25	-0.03	0.31	-0.07	-0.49	-0.35	-0.25	-0.16	0.16	-0.39	-0.27	-0.36	-0.35	-0.45	-0.51	-0.54	-0.4	-0.39	-0.45	-0.47	-0.4	-0.43	-0.39	-0.4	-0.41	-0.47	-0.43	-0.42	-0.4	-0.42	-0.43	-0.42
FAN_EMBRYONIC_CTX_BIG_GROUPS_CAJAL_RETZIUS	0.43	1.9	0.52	1.52	1.84	3.1	0.86	2.55	3.49	1.31	2.4	3.09	6.69	1.61	2.54	1.91	1.73	-0.06	-0.4	0.17	0.47	-0.53	-0.51	-0.49	-0.4	0.21	-0.42	-0.08	-0.24	-0.34	-0.62	-0.52	-0.51	-0.55	-0.48	-0.52	-0.57	-0.53	-0.48	-0.58	-0.56	-0.5	-0.52	-0.48	-0.49	-0.54	-0.54	-0.53	-0.57
HAY_BONE_MARROW_IMMATURE_NEUTROPHIL	0.67	0.7	1.94	3.1	1.09	4.42	0.84	1.38	3.44	3.01	4.84	3.89	8.46	1.59	3.78	4.93	2.24	0.6	0.02	-0.16	-0.12	-0.21	-0.22	-0.23	-0.03	0.05	-0.01	-0.32	-0.19	-0.3	-0.58	-0.55	-0.45	-0.43	-0.49	-0.47	-0.5	-0.43	-0.47	-0.41	-0.54	-0.51	-0.49	-0.47	-0.53	-0.57	-0.51	-0.49	-0.52
TRAVAGLINI_LUNG_BRONCHIAL_VESSEL_1_CELL	0.64	1.13	1.37	2.3	0.97	2.37	0.98	1.53	2.09	1.94	3.38	2.46	6.56	0.43	2.91	2.78	2.11	0.23	0.18	0.73	-0.08	-0.6	-0.72	-0.05	-0.2	0.78	-0.23	-0.29	-0.17	-0.25	0	-0.45	-0.5	-0.22	-0.34	-0.35	-0.4	-0.3	-0.27	-0.34	-0.4	-0.33	-0.3	-0.25	-0.28	-0.36	-0.37	-0.29	-0.13
CUI_DEVELOPING_HEART_C4_ENDOTHELIAL_CELL	0.83	1.76	1.95	2.45	0.74	1.05	0.23	0.71	1.39	0.73	3.43	1.92	6.6	1.4	2.78	2.84	1.86	0.76	0	-0.51	0.11	-0.46	-0.56	-0.36	-0.18	0.65	-0.35	-0.42	-0.43	-0.37	-0.42	-0.41	-0.53	-0.45	-0.47	-0.48	-0.58	-0.41	-0.46	-0.48	-0.49	-0.5	-0.56	-0.5	-0.48	-0.49	-0.49	-0.54	-0.41
HAY_BONE_MARROW_MONOCYTE	1.34	1.94	1.24	2.61	0.37	2.56	0.17	1.22	1.41	1.34	5.1	3.89	8	2.43	3.05	2.77	1.6	0.09	-0.17	0.08	0.53	-0.12	-0.36	-0.36	-0.14	0.02	-0.36	-0.36	-0.29	-0.31	-0.47	-0.42	-0.47	-0.4	-0.39	-0.41	-0.43	-0.38	-0.38	-0.37	-0.45	-0.44	-0.44	-0.4	-0.41	-0.33	-0.38	-0.41	-0.39
TRAVAGLINI_LUNG_LIPOFIBROBLAST_CELL	1.17	1.8	2.24	2.23	2.17	2.93	0.45	1.67	3.09	0.73	4.35	3.1	7.08	1.17	4.09	1.78	1.83	0.45	-0.13	-0.37	0.19	-0.51	-0.74	-0.37	-0.17	0.13	-0.35	-0.44	-0.4	-0.34	-0.37	-0.29	-0.57	-0.37	-0.41	-0.45	-0.55	-0.33	-0.32	-0.46	-0.42	-0.38	-0.47	-0.43	-0.42	-0.47	-0.41	-0.49	-0.25
AIZARANI_LIVER_C4_EPCAM_POS_BILE_DUCT_CELLS_1	1.08	1.81	-0.11	0.95	0.61	2.61	0.19	1.14	2.6	0.75	2.99	2.63	3.14	1.78	1.69	1.56	1.41	-0.23	-0.39	-0.37	0.28	-0.26	-0.49	-0.32	-0.32	-0.36	-0.4	-0.48	-0.42	-0.43	-0.5	-0.46	-0.49	-0.45	-0.49	-0.47	-0.47	-0.47	-0.43	-0.48	-0.49	-0.46	-0.5	-0.45	-0.47	-0.49	-0.46	-0.48	-0.46
AIZARANI_LIVER_C7_EPCAM_POS_BILE_DUCT_CELLS_2	0.95	1.45	-0.08	1.08	0.74	1.84	0.16	0.65	3.31	0.73	3.41	3.18	3.79	1.63	2.07	2.2	1.44	0.49	0.35	0.29	0.29	-0.35	-0.41	-0.38	-0.39	-0.43	-0.42	-0.31	-0.5	-0.44	-0.55	-0.49	-0.53	-0.47	-0.5	-0.52	-0.51	-0.47	-0.45	-0.51	-0.49	-0.47	-0.51	-0.49	-0.5	-0.53	-0.48	-0.48	-0.46
CUI_DEVELOPING_HEART_VASCULAR_ENDOTHELIAL_CELL	1.28	1.98	0.43	1.12	0.52	2.39	0.03	1.97	2.11	2.51	3.48	3.22	4.34	1.24	2.62	2.92	2.06	-0.05	-0.1	-0.39	0.46	0.17	-0.33	-0.22	-0.3	-0.12	-0.41	-0.56	-0.23	-0.38	-0.55	-0.42	-0.49	-0.49	-0.5	-0.5	-0.52	-0.5	-0.51	-0.52	-0.55	-0.5	-0.52	-0.55	-0.53	-0.55	-0.54	-0.5	-0.52
DESCARTES_FETAL_LIVER_MESOTHELIAL_CELLS	0.51	1.93	0	1.3	0.45	2.04	-0.16	0.58	3.1	1.33	3.55	2.29	5.41	0.85	2.26	3.23	1.62	0.39	0.02	0.11	-0.02	-0.41	-0.51	-0.37	-0.45	-0.41	-0.43	-0.3	-0.32	-0.45	-0.49	-0.45	-0.49	-0.46	-0.48	-0.5	-0.48	-0.48	-0.44	-0.45	-0.47	-0.45	-0.47	-0.46	-0.46	-0.48	-0.49	-0.46	-0.44
DESCARTES_FETAL_SPLEEN_MESOTHELIAL_CELLS	0.47	1.79	0.16	1.22	0.45	2.25	0.12	0.8	3.32	1.83	4.71	3.5	5.01	0.97	2.88	3.64	1.37	0.57	0.23	0.1	-0.11	-0.45	-0.54	-0.35	-0.33	-0.27	-0.48	-0.31	-0.33	-0.45	-0.5	-0.5	-0.47	-0.46	-0.5	-0.5	-0.47	-0.48	-0.42	-0.49	-0.46	-0.44	-0.47	-0.47	-0.46	-0.48	-0.46	-0.42	-0.45
FAN_OVARY_CL14_MATURE_SMOOTH_MUSCLE_CELL	0.95	1.34	1.09	2.13	0.85	2.71	-0.16	1.24	3.82	2.3	3.19	3.91	6.51	2.03	2.16	3.2	2.01	0.6	0.56	0.36	0.35	-0.31	-0.33	-0.25	-0.33	-0.22	-0.3	-0.33	-0.27	-0.37	-0.47	-0.5	-0.5	-0.48	-0.49	-0.47	-0.46	-0.45	-0.43	-0.48	-0.46	-0.43	-0.46	-0.43	-0.45	-0.5	-0.47	-0.47	-0.46
FAN_OVARY_CL7_ANGEIOGENIC_ENDOTHELIAL_CELL	1.29	1.52	0.84	1.67	0.5	2.49	-0.21	1.93	3.1	2.08	3.59	3.55	6.12	1.47	2.51	3.65	1.61	0.87	0.78	0.44	0.35	-0.48	-0.45	-0.23	-0.31	-0.04	-0.41	-0.29	-0.37	-0.39	-0.51	-0.5	-0.53	-0.48	-0.56	-0.54	-0.49	-0.45	-0.43	-0.46	-0.49	-0.48	-0.52	-0.51	-0.52	-0.5	-0.51	-0.49	-0.41
CUI_DEVELOPING_HEART_C5_VALVAR_CELL	0.78	1.45	0.04	1.42	1.39	2.86	0.02	2.31	3.75	1.98	3.14	3.64	5.59	1.57	3.02	2.98	2.08	1.26	1	1.21	0.59	-0.64	-0.19	-0.27	-0.37	-0.38	-0.47	-0.07	-0.26	-0.34	-0.44	-0.54	-0.65	-0.49	-0.5	-0.6	-0.57	-0.53	-0.52	-0.48	-0.54	-0.48	-0.49	-0.53	-0.57	-0.56	-0.57	-0.51	-0.52
RUBENSTEIN_SKELETAL_MUSCLE_SATELLITE_CELLS	0.5	1.72	0.26	0.72	0.78	2.3	-0.22	1.59	2.07	1.8	2.4	2.37	4.51	1.78	1.53	2.41	2.18	0.82	0.77	1.05	0.42	-0.73	-0.54	-0.48	-0.15	-0.26	-0.3	-0.52	-0.25	-0.36	-0.5	-0.65	-0.58	-0.43	-0.58	-0.64	-0.56	-0.66	-0.62	-0.61	-0.64	-0.6	-0.64	-0.56	-0.55	-0.65	-0.55	-0.57	-0.56
AIZARANI_LIVER_C23_KUPFFER_CELLS_3	1.73	2.11	0.72	1.18	0.65	2.22	-0.18	1.19	3.16	1.33	4.2	3.67	6.08	1.64	0.95	2.5	1.3	1.65	1.2	1.08	0.42	-0.48	-0.25	-0.33	-0.33	-0.14	-0.45	-0.18	-0.41	-0.43	-0.49	-0.45	-0.51	-0.43	-0.47	-0.46	-0.46	-0.48	-0.45	-0.43	-0.46	-0.43	-0.45	-0.48	-0.49	-0.54	-0.49	-0.43	-0.44
BUSSLINGER_GASTRIC_IMMATURE_PIT_CELLS	1	1.4	0.01	1.45	0.86	1.7	-0.22	0.7	2.57	1.18	4.54	2.63	5.03	1.31	1.66	2.37	1.05	1.04	0.68	0.95	0.35	-0.54	-0.46	-0.53	-0.4	-0.34	-0.52	-0.29	-0.5	-0.41	-0.53	-0.56	-0.51	-0.47	-0.48	-0.55	-0.51	-0.48	-0.47	-0.51	-0.52	-0.47	-0.54	-0.5	-0.52	-0.52	-0.52	-0.51	-0.51
BUSSLINGER_GASTRIC_MATURE_PIT_CELLS	1.22	1.65	0.68	1.66	0.73	1.79	-0.27	0.72	2.34	1.31	4.56	2.75	5.31	1.51	1.52	2.16	1.01	0.86	0.72	0.76	0.36	-0.59	-0.55	-0.47	-0.38	-0.3	-0.65	-0.36	-0.45	-0.41	-0.56	-0.56	-0.56	-0.48	-0.5	-0.58	-0.53	-0.52	-0.47	-0.53	-0.57	-0.48	-0.57	-0.54	-0.56	-0.56	-0.55	-0.59	-0.54
FAN_EMBRYONIC_CTX_BIG_GROUPS_BRAIN_IMMUNE	1.24	1.82	0.58	1.66	0.08	2.6	-0.26	0.71	2.99	2	5.07	3.18	5.82	1.29	0.97	2.13	0.86	1.47	1.38	1.11	0.48	-0.5	-0.44	-0.25	-0.36	-0.23	-0.6	-0.29	-0.33	-0.39	-0.5	-0.46	-0.5	-0.51	-0.48	-0.47	-0.52	-0.44	-0.47	-0.49	-0.44	-0.44	-0.46	-0.5	-0.51	-0.5	-0.43	-0.48	-0.47
FAN_OVARY_CL12_T_LYMPHOCYTE_NK_CELL_2	1.7	1.68	0.71	2.12	0.43	2.61	-0.12	1.12	3.21	1.99	5.18	3.39	6.51	1.52	1.47	2.12	0.93	1.52	1.16	1	0.34	-0.49	-0.5	-0.43	-0.39	-0.31	-0.49	-0.11	-0.35	-0.42	-0.59	-0.55	-0.52	-0.48	-0.5	-0.51	-0.53	-0.5	-0.5	-0.49	-0.55	-0.5	-0.53	-0.49	-0.49	-0.6	-0.51	-0.48	-0.47
ZHENG_CORD_BLOOD_C2_PUTATIVE_BASOPHIL_EOSINOPHIL_MAST_CELL_PROGENITOR	0.93	1.68	0.11	0.88	0.32	1.94	-0.25	0.51	1.96	1.27	3.83	1.88	4.16	1.25	0.21	2.05	1.14	1.05	0.84	0.73	0.43	-0.53	-0.45	-0.3	-0.38	-0.28	-0.59	-0.33	-0.31	-0.43	-0.46	-0.37	-0.5	-0.48	-0.51	-0.49	-0.55	-0.41	-0.53	-0.47	-0.48	-0.45	-0.46	-0.48	-0.48	-0.45	-0.48	-0.52	-0.46
MENON_FETAL_KIDNEY_6_COLLECTING_DUCT_CELLS	1.12	1.25	0.23	1.9	0.21	2.08	-0.15	1.06	3.43	1.14	4.69	4.09	4.2	1.05	1.27	1.91	1.34	0.99	0.84	0.75	0.36	-0.58	-0.3	-0.44	-0.47	-0.36	-0.47	-0.4	-0.39	-0.45	-0.53	-0.55	-0.51	-0.5	-0.52	-0.54	-0.5	-0.53	-0.48	-0.51	-0.52	-0.52	-0.53	-0.51	-0.51	-0.58	-0.52	-0.51	-0.5
DESCARTES_FETAL_LUNG_SQUAMOUS_EPITHELIAL_CELLS	1.12	1.6	0.59	2.21	0.22	1.67	-0.29	0.03	2.73	1.16	3.67	2.25	4.88	0.8	2.32	2.25	0.72	1	0.44	1.15	0.45	-0.38	-0.25	-0.55	-0.37	-0.29	-0.39	-0.34	-0.42	-0.42	-0.61	-0.49	-0.45	-0.5	-0.49	-0.52	-0.48	-0.5	-0.43	-0.53	-0.51	-0.5	-0.47	-0.46	-0.46	-0.49	-0.48	-0.48	-0.49
MENON_FETAL_KIDNEY_10_IMMUNE_CELLS	1.47	1.56	0.53	2.49	0.17	2.39	-0.1	0.32	1.99	1.37	3.5	3.3	3.98	1.49	1.61	2.37	0.47	1.01	0.95	1.01	0.37	-0.54	-0.43	-0.56	-0.47	-0.31	-0.37	-0.45	-0.42	-0.46	-0.57	-0.58	-0.54	-0.51	-0.55	-0.56	-0.54	-0.55	-0.56	-0.61	-0.59	-0.53	-0.55	-0.57	-0.55	-0.6	-0.56	-0.54	-0.61
AIZARANI_LIVER_C24_EPCAM_POS_BILE_DUCT_CELLS_3	0.68	0.92	0.42	1.56	0.75	2.44	0.21	0.88	2.76	1	4.45	3.01	5.01	1.64	1.2	2.58	1.1	0.72	0.45	0.27	0.24	-0.49	-0.37	-0.44	-0.34	-0.42	-0.48	-0.22	-0.52	-0.41	-0.48	-0.41	-0.48	-0.41	-0.45	-0.49	-0.45	-0.43	-0.42	-0.43	-0.45	-0.42	-0.48	-0.42	-0.46	-0.51	-0.46	-0.44	-0.44
AIZARANI_LIVER_C39_EPCAM_POS_BILE_DUCT_CELLS_4	0.72	1.48	0.6	1.98	0.68	2.5	0.02	0.73	2.52	0.94	3.95	3.53	4.68	1.83	1.63	2.14	1.15	0.58	0.43	0.34	0.24	-0.45	-0.39	-0.44	-0.43	-0.39	-0.41	-0.39	-0.5	-0.44	-0.5	-0.52	-0.51	-0.49	-0.48	-0.53	-0.48	-0.48	-0.46	-0.46	-0.47	-0.46	-0.5	-0.48	-0.48	-0.5	-0.52	-0.47	-0.5
LAKE_ADULT_KIDNEY_C10_THIN_ASCENDING_LIMB	0.85	1.47	-0.22	1.58	0.36	2.63	0.03	1.07	1.69	1.34	3.83	3.45	5.15	1.31	0.94	2.08	0.65	0.66	0.46	0.54	0.11	-0.68	-0.48	-0.4	-0.43	-0.34	-0.42	-0.41	-0.5	-0.38	-0.49	-0.54	-0.46	-0.47	-0.45	-0.49	-0.53	-0.43	-0.46	-0.46	-0.46	-0.42	-0.46	-0.46	-0.44	-0.51	-0.46	-0.41	-0.39
LAKE_ADULT_KIDNEY_C18_COLLECTING_DUCT_PRINCIPAL_CELLS_MEDULLA	0.67	1.17	-0.17	1.14	0.53	2.93	-0.12	1.19	1.89	1.11	3.67	3.4	4.64	1.17	1.54	1.94	0.7	0.63	0.45	0.45	0.06	-0.65	-0.59	-0.51	-0.43	-0.39	-0.41	-0.43	-0.48	-0.39	-0.46	-0.57	-0.49	-0.48	-0.47	-0.5	-0.56	-0.48	-0.49	-0.49	-0.5	-0.47	-0.48	-0.48	-0.48	-0.54	-0.52	-0.47	-0.43
LAKE_ADULT_KIDNEY_C8_DECENDING_THIN_LIMB	0.93	1.24	-0.06	1.61	0.74	2.94	0.1	1.64	2.41	1.07	3.43	3.22	4.18	1.42	1.29	2.07	0.97	0.61	0.4	0.41	0.1	-0.7	-0.43	-0.34	-0.43	-0.43	-0.37	-0.38	-0.45	-0.38	-0.41	-0.51	-0.48	-0.48	-0.46	-0.47	-0.54	-0.42	-0.47	-0.45	-0.46	-0.45	-0.48	-0.45	-0.43	-0.54	-0.46	-0.42	-0.38
LAKE_ADULT_KIDNEY_C9_THIN_ASCENDING_LIMB	0.8	1.21	-0.21	1.8	0.61	2.61	0.11	1.45	1.94	1.15	3.02	2.97	4.33	1.39	1.05	2.13	1.12	0.6	0.41	0.31	0.12	-0.71	-0.5	-0.47	-0.45	-0.44	-0.4	-0.47	-0.54	-0.4	-0.45	-0.48	-0.49	-0.5	-0.51	-0.51	-0.56	-0.43	-0.48	-0.43	-0.47	-0.46	-0.47	-0.47	-0.45	-0.55	-0.45	-0.44	-0.38
LAKE_ADULT_KIDNEY_C19_COLLECTING_DUCT_INTERCALATED_CELLS_TYPE_A_MEDULLA	0.94	1.72	-0.05	1.75	0.64	3.17	-0.06	1.5	1.16	0.98	3.55	2.83	4.27	1.28	0.58	1.95	0.85	0.1	-0.11	-0.12	-0.17	-0.7	-0.64	-0.53	-0.42	-0.3	-0.39	-0.41	-0.45	-0.39	-0.48	-0.61	-0.47	-0.54	-0.49	-0.51	-0.52	-0.54	-0.52	-0.49	-0.51	-0.5	-0.5	-0.5	-0.49	-0.57	-0.57	-0.48	-0.4
ZHENG_CORD_BLOOD_C9_GRANULOCYTE_MACROPHAGE_PROGENITOR	0.8	1.9	0.44	2	1.14	3.69	0.01	1.34	2.42	1.11	3.72	2.51	4.77	1.58	1.08	2.15	1.55	0.77	0.05	-0.1	0.15	-0.52	-0.19	-0.46	-0.32	-0.16	-0.43	-0.28	-0.32	-0.34	-0.4	-0.46	-0.41	-0.33	-0.42	-0.37	-0.47	-0.26	-0.36	-0.34	-0.34	-0.35	-0.37	-0.35	-0.39	-0.42	-0.4	-0.33	-0.32
FAN_OVARY_CL16_LYMPHATIC_ENDOTHELIAL_CELL	1.57	1.38	0.81	2.52	0.48	2.54	-0.19	2.13	1.46	1.47	3.89	3.31	6.56	1.59	1.39	2.82	1.54	1.23	0.96	0.45	0.42	-0.58	-0.36	-0.47	-0.31	-0.16	-0.54	-0.32	-0.44	-0.37	-0.53	-0.49	-0.49	-0.41	-0.46	-0.45	-0.51	-0.37	-0.42	-0.42	-0.45	-0.45	-0.51	-0.44	-0.46	-0.44	-0.5	-0.43	-0.39
TRAVAGLINI_LUNG_CAPILLARY_INTERMEDIATE_2_CELL	1.26	1.6	0.09	1.66	1.14	3.51	-0.04	2.38	2	1.65	3.47	3.11	6.3	1.62	1.94	3.54	1.67	0.97	0.83	0.6	0.4	-0.57	-0.44	-0.37	-0.45	-0.29	-0.36	-0.47	-0.41	-0.37	-0.52	-0.48	-0.59	-0.52	-0.47	-0.57	-0.54	-0.47	-0.54	-0.56	-0.54	-0.47	-0.52	-0.53	-0.51	-0.54	-0.5	-0.48	-0.46
FAN_OVARY_CL4_T_LYMPHOCYTE_NK_CELL_1	1.32	1.9	0.66	1.58	0.17	2.48	-0.26	0.85	1.65	1.74	3.76	3.6	5.38	1.02	1.54	2.3	0.68	1.18	0.92	0.68	0.17	-0.58	-0.41	-0.39	-0.38	-0.21	-0.5	-0.29	-0.41	-0.39	-0.43	-0.43	-0.41	-0.48	-0.42	-0.46	-0.51	-0.39	-0.44	-0.4	-0.44	-0.38	-0.45	-0.44	-0.46	-0.49	-0.43	-0.4	-0.41
RUBENSTEIN_SKELETAL_MUSCLE_MYELOID_CELLS	1.82	2.23	0.33	1.08	0.21	2.45	-0.1	1.22	1.47	2	3.65	3.82	5.6	0.99	2.44	2.81	1.14	0.98	0.85	0.75	0.26	-0.55	-0.57	-0.54	-0.39	-0.33	-0.26	-0.26	-0.27	-0.34	-0.5	-0.55	-0.53	-0.51	-0.54	-0.52	-0.55	-0.54	-0.5	-0.46	-0.56	-0.52	-0.51	-0.53	-0.5	-0.54	-0.58	-0.51	-0.55
TRAVAGLINI_LUNG_NEUTROPHIL_CELL	1.73	1.51	1.17	1.44	0.13	2.51	-0.19	1.35	2.11	1.74	4.27	3.63	6.06	1.2	1.19	2.18	2.04	1.36	1.35	1.08	0.71	-0.63	-0.31	-0.41	-0.25	-0.07	-0.44	-0.62	-0.27	-0.33	-0.47	-0.38	-0.51	-0.47	-0.42	-0.53	-0.58	-0.46	-0.52	-0.48	-0.48	-0.45	-0.48	-0.48	-0.49	-0.5	-0.54	-0.48	-0.41
BUSSLINGER_GASTRIC_ISTHMUS_CELLS	1.58	1.81	0.24	1.22	0.72	2.4	0.13	0.76	1.96	0.86	4.38	2.48	4.92	1.43	1.55	2.1	0.96	0.69	0.44	0.53	0.18	-0.61	-0.54	-0.43	-0.27	-0.34	-0.42	-0.39	-0.44	-0.41	-0.5	-0.43	-0.46	-0.47	-0.41	-0.5	-0.52	-0.45	-0.44	-0.4	-0.46	-0.43	-0.47	-0.44	-0.5	-0.47	-0.49	-0.48	-0.47
FAN_OVARY_CL13_MONOCYTE_MACROPHAGE	1.6	2.14	0.6	1.26	0.39	2.62	0.3	0.79	2.04	1.54	5.07	3.82	6.92	1.85	1.79	2.69	1.51	0.91	0.62	0.6	0.15	-0.56	-0.19	-0.57	-0.4	-0.19	-0.37	-0.17	-0.42	-0.39	-0.51	-0.58	-0.45	-0.44	-0.46	-0.48	-0.51	-0.48	-0.48	-0.41	-0.52	-0.44	-0.48	-0.46	-0.46	-0.54	-0.47	-0.43	-0.49
HAY_BONE_MARROW_NEUTROPHIL	1.54	1.97	1.16	1.87	0.79	3.89	-0.16	1.46	2.73	1.43	3.87	2.96	6.07	1.73	1.79	2.79	1.55	1.32	0.98	0.15	0.5	-0.48	-0.37	-0.43	-0.42	-0.18	-0.42	-0.42	-0.39	-0.43	-0.45	-0.46	-0.47	-0.45	-0.48	-0.54	-0.51	-0.49	-0.46	-0.46	-0.5	-0.46	-0.49	-0.49	-0.48	-0.51	-0.48	-0.47	-0.44
TRAVAGLINI_LUNG_EREG_DENDRITIC_CELL	2	2.28	1.34	1.17	0.36	2.73	0.38	1.44	2.61	1.37	4.21	3.15	6.56	1.84	1.68	2.3	1.27	0.76	0.61	0.67	0.2	-0.53	-0.4	-0.43	-0.35	-0.2	-0.37	-0.4	-0.4	-0.4	-0.49	-0.48	-0.46	-0.44	-0.46	-0.45	-0.5	-0.41	-0.4	-0.43	-0.45	-0.43	-0.43	-0.45	-0.43	-0.49	-0.44	-0.4	-0.42
TRAVAGLINI_LUNG_MESOTHELIAL_CELL	1.66	2.12	0.71	1.24	0.76	2.77	0.1	1.17	2.3	1.02	3.89	2.75	6.21	1.65	1.43	2.29	1.21	0.59	0.45	0.43	0.22	-0.57	-0.59	-0.43	-0.31	-0.13	-0.23	-0.35	-0.4	-0.37	-0.41	-0.58	-0.42	-0.43	-0.45	-0.45	-0.47	-0.41	-0.43	-0.46	-0.48	-0.41	-0.45	-0.42	-0.43	-0.48	-0.5	-0.46	-0.46
TRAVAGLINI_LUNG_OLR1_CLASSICAL_MONOCYTE_CELL	1.69	2.06	0.95	1.73	0.71	3.43	0.36	1.17	2.45	1.22	3.64	3.26	6.19	1.91	1.7	2.88	1.48	0.83	0.6	0.7	0.27	-0.55	-0.29	-0.34	-0.35	-0.18	-0.33	-0.38	-0.45	-0.39	-0.48	-0.51	-0.42	-0.43	-0.45	-0.48	-0.49	-0.39	-0.4	-0.38	-0.45	-0.43	-0.43	-0.42	-0.38	-0.47	-0.43	-0.39	-0.4
TRAVAGLINI_LUNG_ADVENTITIAL_FIBROBLAST_CELL	1.13	2.31	0.88	1.69	1	3.06	0.14	1.18	2.88	1.36	4.64	2.42	6.57	1.35	2.23	2.49	1.01	1.28	0.95	0.59	0.35	-0.61	-0.52	-0.3	-0.35	-0.19	-0.46	-0.5	-0.32	-0.4	-0.5	-0.44	-0.53	-0.48	-0.5	-0.51	-0.56	-0.44	-0.46	-0.52	-0.52	-0.5	-0.53	-0.51	-0.5	-0.48	-0.54	-0.48	-0.49
RUBENSTEIN_SKELETAL_MUSCLE_FAP_CELLS	1.4	2.14	0.23	0.39	0.01	1.73	-0.22	0.91	1.32	1.22	3.27	2.17	4.4	0.58	1.57	2.36	1.62	0.68	0.57	0.39	0	-0.48	-0.23	-0.33	-0.46	-0.4	-0.45	-0.19	-0.39	-0.42	-0.5	-0.47	-0.46	-0.51	-0.48	-0.5	-0.49	-0.47	-0.48	-0.43	-0.48	-0.46	-0.51	-0.47	-0.47	-0.5	-0.51	-0.45	-0.52
RUBENSTEIN_SKELETAL_MUSCLE_FBN1_FAP_CELLS	1.09	2.11	0.19	1.06	0.25	2.4	-0.13	1.35	1.08	1.14	4	2.3	5.88	1.39	1.69	2.73	1.52	0.67	0.54	0.22	-0.15	-0.41	-0.23	-0.45	-0.38	-0.32	-0.41	-0.26	-0.41	-0.43	-0.5	-0.47	-0.42	-0.43	-0.42	-0.45	-0.47	-0.47	-0.43	-0.4	-0.45	-0.45	-0.47	-0.42	-0.43	-0.47	-0.48	-0.44	-0.48
TRAVAGLINI_LUNG_ALVEOLAR_EPITHELIAL_TYPE_1_CELL	1.73	2.44	-0.05	1.47	0.27	2.01	-0.2	0.91	2.36	1.21	3.97	2.92	5.96	1.22	2.1	2.55	1.29	0.42	0.09	0.09	-0.04	-0.4	-0.38	-0.48	-0.41	-0.31	-0.37	-0.39	-0.47	-0.42	-0.48	-0.49	-0.43	-0.48	-0.44	-0.47	-0.45	-0.49	-0.45	-0.48	-0.47	-0.45	-0.48	-0.45	-0.47	-0.49	-0.46	-0.44	-0.47
TRAVAGLINI_LUNG_TREM2_DENDRITIC_CELL	1.72	2.31	0.03	1.79	0.42	2.45	0.05	0.9	1.79	1.43	3.49	3.02	5.1	1.26	1.77	2.36	1.93	0.6	0.41	0.09	-0.09	-0.5	-0.14	-0.47	-0.34	-0.24	-0.51	-0.17	-0.37	-0.37	-0.51	-0.46	-0.48	-0.47	-0.46	-0.47	-0.46	-0.5	-0.45	-0.49	-0.5	-0.46	-0.49	-0.46	-0.46	-0.53	-0.48	-0.49	-0.5
TRAVAGLINI_LUNG_MACROPHAGE_CELL	1.83	1.93	0.27	1.36	0.15	1.76	0.17	0.65	1.62	1.14	4.23	2.79	5.75	1.45	1.93	3	1.85	0.46	0.08	-0.02	-0.25	-0.5	-0.17	-0.45	-0.43	-0.15	-0.55	-0.31	-0.36	-0.41	-0.53	-0.49	-0.5	-0.44	-0.46	-0.54	-0.52	-0.56	-0.48	-0.52	-0.55	-0.5	-0.56	-0.52	-0.54	-0.58	-0.52	-0.53	-0.55
TRAVAGLINI_LUNG_PROLIFERATING_MACROPHAGE_CELL	1.82	2.23	-0.15	1.49	0.55	2.7	0.35	0.9	1.42	1.25	3.64	2.83	5.7	1.51	1.37	2.21	1.58	0.45	0.26	0.38	0.06	-0.61	-0.24	-0.54	-0.31	-0.22	-0.52	-0.34	-0.3	-0.33	-0.39	-0.38	-0.48	-0.44	-0.38	-0.45	-0.46	-0.41	-0.49	-0.38	-0.49	-0.42	-0.43	-0.42	-0.43	-0.49	-0.43	-0.44	-0.35
HU_FETAL_RETINA_BLOOD	1.02	2.29	0.18	1.1	0.94	1.25	0.97	1.66	2.38	1.03	3.77	2.49	5.07	1.77	1.46	2.38	0.85	1.18	1	0.86	0.52	-0.57	-0.68	-0.54	-0.36	-0.29	-0.72	-0.52	-0.36	-0.43	-0.63	-0.62	-0.61	-0.55	-0.51	-0.65	-0.58	-0.55	-0.61	-0.57	-0.61	-0.6	-0.54	-0.59	-0.6	-0.59	-0.56	-0.59	-0.51
TRAVAGLINI_LUNG_CLASSICAL_MONOCYTE_CELL	0.68	1.45	0.78	1.71	0.68	2.23	1.23	1.85	3.16	1.41	3.59	2.79	5.8	2.34	1.78	2.66	0.69	1.44	1.33	1.26	0.45	-0.46	-0.22	-0.44	-0.21	-0.04	-0.43	-0.32	-0.43	-0.46	-0.53	-0.54	-0.58	-0.46	-0.51	-0.56	-0.45	-0.46	-0.5	-0.5	-0.54	-0.46	-0.52	-0.54	-0.49	-0.56	-0.54	-0.53	-0.51
LAKE_ADULT_KIDNEY_C12_THICK_ASCENDING_LIMB	1.63	1.96	0.32	2.02	0.95	2.65	0.49	1.59	1.27	1.87	2.95	2.56	4.67	1.51	1.39	2.21	1.76	0.89	0.73	0.95	0.62	-0.41	-0.49	-0.41	-0.42	0.06	-0.37	-0.52	-0.28	-0.4	-0.43	-0.55	-0.5	-0.5	-0.53	-0.5	-0.51	-0.57	-0.51	-0.45	-0.56	-0.53	-0.52	-0.53	-0.49	-0.61	-0.58	-0.5	-0.51
MENON_FETAL_KIDNEY_4_PODOCYTES	1.03	2.04	-0.06	1.6	0.51	1.87	-0.1	1.31	1.72	1.2	2.18	2.06	3.64	1.47	1.01	2.05	1.59	0.37	0.33	0.34	0.2	-0.46	-0.35	-0.41	-0.36	-0.4	-0.48	-0.46	-0.48	-0.44	-0.49	-0.5	-0.5	-0.48	-0.54	-0.52	-0.46	-0.52	-0.51	-0.47	-0.51	-0.48	-0.53	-0.51	-0.52	-0.51	-0.52	-0.51	-0.53
LAKE_ADULT_KIDNEY_C7_PROXIMAL_TUBULE_EPITHELIAL_CELLS_S3	1.83	2.34	0.7	1.72	0.74	1.51	0.2	1.06	1.84	1.05	1.65	2.06	2.95	0.92	1.49	1.87	1.08	0.63	0.64	0.46	0.43	-0.62	-0.53	-0.55	-0.47	-0.37	-0.42	-0.53	-0.55	-0.4	-0.46	-0.58	-0.49	-0.52	-0.56	-0.62	-0.58	-0.55	-0.57	-0.54	-0.58	-0.57	-0.57	-0.56	-0.54	-0.6	-0.63	-0.54	-0.55
MENON_FETAL_KIDNEY_9_ENDOTHELIAL_CELLS	2.23	2.59	0.43	2	0.53	1.62	-0.2	1.52	1.97	1.49	2.49	2.66	4.15	1.14	1.31	2.56	0.93	0.58	0.49	0.4	0.36	-0.52	-0.47	-0.3	-0.36	-0.09	-0.48	-0.44	-0.43	-0.43	-0.46	-0.45	-0.49	-0.43	-0.49	-0.45	-0.49	-0.41	-0.49	-0.45	-0.45	-0.41	-0.48	-0.45	-0.46	-0.47	-0.44	-0.45	-0.41
TRAVAGLINI_LUNG_CAPILLARY_AEROCYTE_CELL	1.37	2.14	0.37	1.9	-0.02	1.4	0.08	0.18	2.19	1.47	2.39	2.83	4.19	1.33	0.71	2.19	1.31	1.14	1.11	1.17	0.33	-0.5	-0.27	-0.52	-0.4	-0.37	-0.61	-0.4	-0.51	-0.48	-0.53	-0.52	-0.58	-0.5	-0.55	-0.55	-0.51	-0.54	-0.53	-0.52	-0.53	-0.54	-0.55	-0.53	-0.54	-0.55	-0.53	-0.53	-0.52
MENON_FETAL_KIDNEY_7_LOOPOF_HENLE_CELLS_DISTAL	1.91	2.38	0.02	1.04	0.72	1.36	0.26	1.12	1.06	1.13	2.68	2.32	3.83	1.84	1.5	1.36	0.3	0.89	0.78	0.71	0.78	-0.23	-0.51	-0.43	-0.32	0.18	-0.44	-0.51	-0.3	-0.34	-0.6	-0.63	-0.62	-0.58	-0.55	-0.66	-0.56	-0.6	-0.55	-0.54	-0.59	-0.59	-0.64	-0.58	-0.66	-0.67	-0.58	-0.6	-0.46
MENON_FETAL_KIDNEY_8_CONNECTING_TUBULE_CELLS	2.04	2.21	0.07	1.14	0.65	1.28	-0.07	0.9	1.41	0.55	3.22	2.29	3.16	1.43	2.16	2.59	0.81	0.61	0.5	0.74	0.09	-0.67	-0.56	-0.52	-0.48	-0.37	-0.53	-0.6	-0.53	-0.43	-0.61	-0.6	-0.61	-0.56	-0.58	-0.54	-0.58	-0.56	-0.53	-0.52	-0.56	-0.57	-0.59	-0.55	-0.58	-0.62	-0.57	-0.57	-0.58
CUI_DEVELOPING_HEART_VALVAR_ENDOTHELIAL_CELL	0.92	2.19	0.05	0.9	1.45	2.68	-0.04	0.45	1.74	1.29	3.85	2.55	6.44	1.02	2.31	2.82	1.62	1.29	1.18	1.26	0.76	-0.45	-0.22	-0.42	-0.31	-0.2	-0.5	-0.37	-0.38	-0.47	-0.56	-0.53	-0.56	-0.51	-0.5	-0.54	-0.54	-0.53	-0.52	-0.51	-0.52	-0.52	-0.53	-0.54	-0.52	-0.57	-0.55	-0.53	-0.53
FAN_OVARY_CL10_PUTATIVE_EARLY_ATRESIA_GRANULOSA_CELL	0.89	1.85	0.86	0.84	1.34	2.68	0.29	1.35	1.1	0.86	3.71	1.57	5.73	1.43	2	2.45	1.41	0.58	0.08	0.39	0.6	-0.21	-0.29	-0.38	-0.28	-0.19	-0.29	-0.42	-0.45	-0.32	-0.43	-0.55	-0.36	-0.44	-0.61	-0.56	-0.44	-0.49	-0.47	-0.46	-0.53	-0.46	-0.5	-0.47	-0.51	-0.6	-0.51	-0.52	-0.45
TRAVAGLINI_LUNG_DIFFERENTIATING_BASAL_CELL	0.81	2	0.98	1.29	1.29	3.3	0.1	0.57	1.95	0.56	3.51	1.84	6.32	0.96	2.14	1.82	0.98	0.27	-0.03	-0.5	0.17	-0.48	-0.43	-0.33	-0.3	-0.21	-0.41	-0.39	-0.33	-0.39	-0.52	-0.27	-0.5	-0.37	-0.4	-0.44	-0.42	-0.43	-0.39	-0.43	-0.45	-0.38	-0.42	-0.43	-0.44	-0.44	-0.43	-0.39	-0.38
TRAVAGLINI_LUNG_PROLIFERATING_BASAL_CELL	1.53	1.76	0.62	1.56	1.47	4.22	0.37	1.48	1.54	0.48	3.78	2.53	5.94	1.46	1.43	1.88	2.02	0.54	0.11	0.86	0.34	-0.74	-0.43	-0.56	-0.08	0.04	-0.41	-0.09	-0.13	-0.25	-0.29	-0.32	-0.54	-0.26	-0.28	-0.28	-0.28	-0.29	-0.36	-0.32	-0.4	-0.37	-0.31	-0.29	-0.33	-0.42	-0.32	-0.28	-0.26
GAUTAM_EYE_CORNEA_TGFBI_HIGH_EPITHELIAL_CELLS	2.14	2.67	0.36	0.69	0.67	2.63	0.56	0.5	2.09	1.57	3.15	3.17	4.23	0.9	2.4	2.62	0.38	0.04	-0.13	0.04	0.36	-0.55	-0.35	-0.24	-0.16	-0.21	-0.52	-0.35	-0.09	-0.34	-0.56	-0.33	-0.41	-0.19	-0.41	-0.49	-0.36	-0.3	-0.23	-0.29	-0.39	-0.41	-0.36	-0.41	-0.42	-0.41	-0.47	-0.39	-0.28
HU_FETAL_RETINA_PHOTORECEPTOR	1.98	2.54	-0.14	0.53	0.48	3.15	-0.06	1.25	1.53	0.36	2.04	1.96	2.95	1.1	2.53	1.64	1.34	-0.2	-0.14	-0.06	1.09	0.18	-0.57	-0.35	-0.07	-0.1	-0.65	-0.53	-0.36	-0.37	-0.47	-0.43	-0.35	-0.44	-0.47	-0.46	-0.46	-0.4	-0.41	-0.38	-0.47	-0.43	-0.48	-0.41	-0.44	-0.45	-0.42	-0.4	-0.39
MENON_FETAL_KIDNEY_1_EMBRYONIC_RED_BLOOD_CELLS	1.22	1.16	0.15	0.24	0.34	1.66	0.04	0.84	1.08	1.07	1.05	1.8	3.1	0.11	0.73	1.51	1.32	-0.29	-0.32	0.15	0.41	-0.54	-0.55	-0.18	-0.14	-0.03	-0.31	-0.06	-0.16	-0.23	0.18	-0.11	-0.31	-0.21	-0.35	-0.42	-0.29	-0.18	-0.34	-0.29	-0.35	-0.24	-0.37	-0.38	-0.29	-0.28	-0.4	-0.38	-0.11
CUI_DEVELOPING_HEART_COMPACT_VENTRICULAR_CARDIOMYOCYTE	2.09	2.39	0.33	2.26	0.93	1.5	-0.21	0.88	2.69	1.39	2.94	2.32	3.9	0.76	0.44	2.57	2.66	-0.07	-0.43	0.17	-0.14	-0.43	-0.53	-0.36	-0.31	-0.29	-0.37	-0.42	-0.43	-0.43	-0.47	-0.44	-0.5	-0.4	-0.48	-0.48	-0.49	-0.49	-0.5	-0.48	-0.52	-0.48	-0.53	-0.51	-0.54	-0.5	-0.42	-0.48	-0.49
HAY_BONE_MARROW_CD34_POS_HSC	0.88	1.41	0.34	3.31	0.42	1.7	-0.23	1.42	2.77	0.87	2.62	2.31	2.24	0.06	1.3	2.02	2.07	-0.11	-0.26	0.17	-0.25	-0.5	-0.3	-0.52	-0.34	-0.42	-0.42	-0.44	-0.51	-0.43	-0.49	-0.49	-0.49	-0.48	-0.51	-0.49	-0.56	-0.49	-0.5	-0.52	-0.53	-0.49	-0.53	-0.5	-0.52	-0.56	-0.51	-0.51	-0.46
AIZARANI_LIVER_C33_STELLATE_CELLS_2	2.23	2.89	-0.05	2.28	1.2	2.89	-0.05	1.62	2.57	0.82	1.87	1.87	3.86	0.8	2.01	2.22	2.18	-0.07	-0.36	-0.58	-0.21	-0.45	-0.41	-0.37	-0.34	-0.23	-0.44	-0.38	-0.43	-0.43	-0.4	-0.45	-0.5	-0.41	-0.47	-0.46	-0.48	-0.42	-0.44	-0.43	-0.41	-0.38	-0.4	-0.44	-0.43	-0.42	-0.44	-0.44	-0.42
MENON_FETAL_KIDNEY_3_STROMAL_CELLS	2.02	2.57	0.63	2.79	1.69	2.63	0.19	1.84	2.51	1.21	1.77	1.6	3.08	0.81	1.9	2.43	2.5	-0.17	-0.26	-0.48	-0.19	-0.43	-0.4	-0.25	-0.42	-0.33	-0.5	-0.39	-0.42	-0.43	-0.45	-0.48	-0.46	-0.43	-0.47	-0.47	-0.45	-0.46	-0.46	-0.43	-0.45	-0.46	-0.45	-0.45	-0.44	-0.46	-0.44	-0.44	-0.44
HU_FETAL_RETINA_RPE	1.5	1.82	0.3	2.23	1.25	2.69	-0.15	1.67	2.2	1.24	2.3	2.15	4.08	0.79	2.32	2.59	2.81	-0.32	-0.45	-0.45	-0.08	-0.54	-0.25	-0.35	-0.38	-0.23	-0.54	-0.3	-0.48	-0.43	-0.42	-0.42	-0.45	-0.43	-0.44	-0.47	-0.47	-0.47	-0.45	-0.46	-0.46	-0.44	-0.49	-0.47	-0.49	-0.51	-0.49	-0.47	-0.46
LAKE_ADULT_KIDNEY_C22_ENDOTHELIAL_CELLS_GLOMERULAR_CAPILLARIES	2.15	2.66	0.6	3.16	0.93	2.15	0.1	1.41	1.87	0.85	1.4	1.55	3.48	0.71	2.27	2.05	1.67	-0.2	-0.3	0.25	-0.23	-0.4	-0.65	-0.36	-0.26	-0.11	-0.45	-0.59	-0.47	-0.42	-0.47	-0.4	-0.46	-0.38	-0.44	-0.44	-0.43	-0.43	-0.4	-0.44	-0.46	-0.4	-0.43	-0.43	-0.41	-0.43	-0.41	-0.39	-0.41
LAKE_ADULT_KIDNEY_C26_MESANGIAL_CELLS	2.38	2.87	0.69	3.31	0.74	1.91	-0.06	2.19	2.83	1.18	2.36	3.01	3.95	0.86	2.56	2.05	1.66	-0.21	-0.18	0.45	-0.11	-0.5	-0.68	-0.22	-0.32	-0.18	-0.37	-0.5	-0.41	-0.42	-0.46	-0.47	-0.48	-0.41	-0.48	-0.53	-0.47	-0.5	-0.43	-0.49	-0.48	-0.44	-0.47	-0.47	-0.46	-0.47	-0.49	-0.41	-0.44
LAKE_ADULT_KIDNEY_C27_VASCULAR_SMOOTH_MUSCLE_CELLS_AND_PERICYTES	2.01	2.55	1.01	3.79	1.78	3.14	0.29	2.27	3.18	1.4	2.04	2.05	2.94	0.9	3.38	2.7	2.07	-0.18	-0.15	0.47	0.06	-0.44	-0.54	-0.42	-0.3	-0.15	-0.4	-0.29	-0.33	-0.42	-0.39	-0.42	-0.45	-0.42	-0.44	-0.47	-0.46	-0.45	-0.39	-0.38	-0.43	-0.42	-0.39	-0.41	-0.42	-0.44	-0.43	-0.4	-0.4
LAKE_ADULT_KIDNEY_C28_INTERSTITIUM	2.11	2.29	0.16	4	2.22	2.86	0.42	2.54	2.95	0.52	1.51	1.24	3.55	0.59	2.69	2.66	1.59	-0.37	-0.29	0.29	-0.07	-0.45	-0.46	-0.42	-0.27	-0.13	-0.28	-0.55	-0.47	-0.43	-0.44	-0.49	-0.44	-0.42	-0.45	-0.44	-0.47	-0.42	-0.51	-0.46	-0.47	-0.43	-0.46	-0.44	-0.46	-0.47	-0.44	-0.43	-0.46
LAKE_ADULT_KIDNEY_C4_PROXIMAL_TUBULE_EPITHELIAL_CELLS_S2	1.81	2.41	-0.1	2.76	1.55	3.41	0.11	1.42	2.72	0.7	1.32	1.33	3.64	0.85	2.34	1.98	1.36	-0.37	-0.32	-0.39	-0.29	-0.43	-0.46	-0.43	-0.37	-0.29	-0.44	-0.42	-0.44	-0.43	-0.47	-0.43	-0.45	-0.43	-0.41	-0.43	-0.42	-0.43	-0.43	-0.44	-0.44	-0.43	-0.42	-0.4	-0.41	-0.42	-0.43	-0.42	-0.43
FAN_EMBRYONIC_CTX_OPC	2.58	2.83	-0.11	3.75	1.02	4.06	0.65	0.68	3.21	0.95	2.64	2.43	4.43	0.2	1.35	2.78	0.63	0.18	-0.06	0.44	-0.26	-0.36	-0.06	-0.35	-0.35	-0.31	-0.04	0.01	-0.52	-0.35	-0.61	-0.5	-0.57	-0.5	-0.52	-0.43	-0.56	-0.46	-0.58	-0.44	-0.54	-0.47	-0.6	-0.52	-0.56	-0.6	-0.5	-0.49	-0.52
LAKE_ADULT_KIDNEY_C24_ENDOTHELIAL_CELLS_AEA_AND_DVR	1.94	2.4	0.13	3.46	0.66	2.31	-0.14	1.78	1.36	0.5	1.95	2.08	3.45	0.44	0.79	1.91	2.18	-0.2	-0.22	-0.45	-0.12	-0.51	-0.56	-0.23	-0.37	-0.19	-0.24	-0.44	-0.43	-0.38	-0.36	-0.47	-0.47	-0.41	-0.47	-0.52	-0.5	-0.43	-0.45	-0.49	-0.48	-0.41	-0.47	-0.46	-0.47	-0.44	-0.43	-0.4	-0.37
RUBENSTEIN_SKELETAL_MUSCLE_ENDOTHELIAL_CELLS	2.55	2.57	1.23	3.3	0.39	1.94	-0.07	1.07	1.87	0.23	2.6	1.74	3.47	0.47	1.06	2.54	1.51	-0.05	-0.34	-0.16	-0.12	-0.55	-0.63	-0.43	-0.27	-0.01	-0.41	-0.61	-0.45	-0.45	-0.41	-0.45	-0.5	-0.48	-0.46	-0.48	-0.54	-0.4	-0.46	-0.49	-0.49	-0.46	-0.5	-0.49	-0.5	-0.47	-0.46	-0.47	-0.41
ZHENG_CORD_BLOOD_C7_PUTATIVE_LYMPHOID_PRIMED_MULTIPOTENT_PROGENITOR_1	2.24	2.19	0.78	2.51	0.43	1.26	0.53	0.7	1.45	0.44	1.94	1.06	3.12	0.48	0.52	1.09	0.39	-0.06	-0.1	-0.32	-0.14	-0.48	-0.53	-0.28	-0.35	-0.33	-0.26	-0.5	-0.36	-0.35	-0.36	-0.44	-0.34	-0.36	-0.45	-0.44	-0.51	-0.3	-0.31	-0.35	-0.41	-0.33	-0.41	-0.37	-0.35	-0.36	-0.39	-0.34	-0.28
LAKE_ADULT_KIDNEY_C11_THIN_ASCENDING_LIMB	2.5	2.4	0.38	2.3	1.31	2.65	0.34	2.13	1.27	1.11	2.59	1.57	3.52	1.42	1.14	1.74	0	1.19	1.16	0.04	0.3	-0.52	-0.44	-0.41	-0.36	-0.26	-0.46	-0.48	-0.44	-0.43	-0.57	-0.43	-0.55	-0.43	-0.52	-0.46	-0.46	-0.5	-0.46	-0.51	-0.51	-0.5	-0.5	-0.48	-0.49	-0.51	-0.49	-0.49	-0.45
ZHENG_CORD_BLOOD_C6_HSC_MULTIPOTENT_PROGENITOR	2.07	1.8	0.72	2.62	1.54	3.42	0.15	1.99	0.59	-0.08	3.9	2.07	3.28	0.69	1.85	1.48	1.36	0.2	0.02	0.7	-0.09	-0.49	-0.35	-0.37	-0.42	-0.04	-0.25	-0.52	-0.44	-0.35	-0.52	-0.49	-0.62	-0.51	-0.58	-0.56	-0.57	-0.5	-0.51	-0.55	-0.58	-0.53	-0.56	-0.52	-0.55	-0.64	-0.56	-0.58	-0.51
DESCARTES_FETAL_THYMUS_VASCULAR_ENDOTHELIAL_CELLS	2.19	2.88	0.23	2.21	0.13	0.44	0.31	2.36	2.05	0.56	2.02	1.93	4.31	-0.07	1.63	1.62	1.78	-0.29	-0.24	-0.28	0.06	-0.49	-0.33	-0.38	-0.34	-0.11	-0.47	-0.19	-0.4	-0.35	-0.47	-0.39	-0.43	-0.39	-0.44	-0.45	-0.49	-0.42	-0.41	-0.4	-0.47	-0.44	-0.41	-0.43	-0.48	-0.42	-0.43	-0.45	-0.34
DESCARTES_FETAL_THYMUS_STROMAL_CELLS	2.26	3.04	1.04	1.73	1.02	1.95	0.27	2.33	2.98	0.88	1.71	1.45	4.36	0.85	2.35	2.24	2.66	0.85	0.86	0.28	0.67	-0.56	-0.38	0.09	-0.44	-0.36	-0.56	-0.47	-0.52	-0.49	-0.54	-0.46	-0.55	-0.47	-0.53	-0.54	-0.47	-0.51	-0.5	-0.5	-0.53	-0.53	-0.51	-0.54	-0.52	-0.53	-0.53	-0.51	-0.54
GAO_LARGE_INTESTINE_24W_C11_PANETH_LIKE_CELL	1.8	2.27	1.32	1.43	0.27	1.9	1.25	2.53	1.49	0.63	2.75	1.76	4.5	1.04	1.83	1.29	1.82	0.63	0.43	-0.29	0.01	-0.44	-0.32	-0.39	-0.28	-0.16	-0.51	-0.44	-0.4	-0.42	-0.45	-0.45	-0.46	-0.4	-0.4	-0.4	-0.43	-0.39	-0.4	-0.35	-0.43	-0.41	-0.4	-0.39	-0.4	-0.44	-0.44	-0.42	-0.41
DURANTE_ADULT_OLFACTORY_NEUROEPITHELIUM_PERICYTES	1.73	2.99	0.73	1.85	0.29	2.12	-0.18	3.23	1.33	0.98	0.58	1.93	4.25	0.3	2.54	2.49	2.9	-0.19	-0.3	-0.54	0.01	-0.35	-0.52	-0.33	-0.22	0.41	-0.38	-0.53	-0.39	-0.42	-0.46	-0.44	-0.45	-0.45	-0.47	-0.5	-0.45	-0.45	-0.5	-0.48	-0.47	-0.46	-0.49	-0.53	-0.48	-0.49	-0.5	-0.48	-0.48
ZHONG_PFC_C4_UNKNOWN_INP	0.77	3.02	0.86	1.3	0.68	1.17	0.18	2.98	0.94	-0.22	1.94	0.69	3.24	0.22	2.13	1.59	1.47	-0.21	-0.4	-0.24	-0.18	-0.57	-0.3	-0.46	-0.35	-0.14	-0.48	-0.44	-0.46	-0.4	-0.51	-0.51	-0.46	-0.49	-0.5	-0.53	-0.48	-0.5	-0.51	-0.5	-0.48	-0.47	-0.48	-0.45	-0.46	-0.47	-0.52	-0.48	-0.52
CUI_DEVELOPING_HEART_CARDIAC_FIBROBLASTS	2.01	2.51	-0.06	1.48	1.15	2.86	0.14	2	3	1.4	2.07	1.6	3.83	0.47	2.66	1.57	2.71	-0.08	-0.28	-0.14	0.14	-0.37	-0.11	-0.52	-0.33	0.37	-0.23	-0.2	-0.32	-0.42	-0.59	-0.62	-0.46	-0.55	-0.51	-0.52	-0.53	-0.49	-0.47	-0.48	-0.5	-0.52	-0.5	-0.47	-0.47	-0.6	-0.48	-0.48	-0.47
MANNO_MIDBRAIN_NEUROTYPES_HOPC	2	2.74	0.6	0.46	1.54	3.88	0.42	3.29	3.65	1.36	2.83	2.06	5.3	1.16	3.07	1.52	2.91	0.18	-0.08	-0.05	1.17	-0.31	-0.16	-0.27	-0.28	-0.05	-0.36	-0.37	-0.33	-0.4	-0.52	-0.37	-0.51	-0.39	-0.32	-0.49	-0.47	-0.44	-0.4	-0.45	-0.5	-0.5	-0.43	-0.43	-0.45	-0.4	-0.53	-0.46	-0.44
MANNO_MIDBRAIN_NEUROTYPES_HRGL1	0.87	2.25	1.32	0.95	1.55	4.35	0.74	2.26	2.6	0.89	2.16	1.4	5.34	1.71	3.2	2.06	3.3	-0.1	-0.32	-0.45	-0.05	-0.52	-0.24	-0.4	-0.39	-0.1	-0.49	-0.33	-0.42	-0.42	-0.45	-0.46	-0.52	-0.43	-0.49	-0.48	-0.44	-0.48	-0.46	-0.46	-0.48	-0.45	-0.46	-0.45	-0.45	-0.48	-0.46	-0.45	-0.45
MANNO_MIDBRAIN_NEUROTYPES_HRGL2B	1.22	2.38	0.85	1.04	1.23	2.62	0.34	2.13	2.14	1.03	2.14	2.3	4.92	1.14	2.66	2.44	2.89	-0.17	-0.24	-0.36	0.07	-0.53	-0.47	-0.38	-0.45	-0.16	-0.56	-0.3	-0.35	-0.43	-0.55	-0.52	-0.53	-0.43	-0.48	-0.46	-0.47	-0.46	-0.46	-0.48	-0.53	-0.47	-0.52	-0.47	-0.49	-0.56	-0.48	-0.48	-0.47
MANNO_MIDBRAIN_NEUROTYPES_HRGL2A	1.13	2.67	0.67	1.66	1.05	3.15	0.34	2.66	2.66	0.88	1.65	1.61	5.46	1.64	3.21	2.51	2.47	-0.28	-0.33	-0.27	0.04	-0.52	-0.27	-0.3	-0.49	-0.32	-0.39	-0.32	-0.37	-0.43	-0.51	-0.49	-0.54	-0.42	-0.47	-0.45	-0.42	-0.45	-0.44	-0.46	-0.48	-0.43	-0.47	-0.43	-0.45	-0.46	-0.48	-0.47	-0.5
MANNO_MIDBRAIN_NEUROTYPES_HRGL3	1.09	2.72	0.33	1.6	1	3.7	-0.18	2.33	2.56	1.1	2.18	1.84	5.04	1.38	2.21	2.37	2.61	-0.21	-0.36	-0.36	-0.24	-0.45	-0.31	-0.35	-0.45	-0.19	-0.5	-0.31	-0.4	-0.43	-0.44	-0.46	-0.5	-0.41	-0.44	-0.45	-0.41	-0.46	-0.44	-0.44	-0.45	-0.43	-0.45	-0.44	-0.45	-0.45	-0.44	-0.43	-0.44
MANNO_MIDBRAIN_NEUROTYPES_HRGL2C	1.62	2.58	0.59	0.7	0.93	3	0.21	2.11	2.6	1.11	1.67	1.23	5.53	1.89	2.99	1.48	2.3	-0.16	-0.3	0.15	0.21	-0.53	-0.25	-0.28	-0.48	-0.08	-0.49	-0.33	-0.37	-0.41	-0.52	-0.43	-0.55	-0.43	-0.38	-0.46	-0.48	-0.4	-0.44	-0.4	-0.52	-0.49	-0.46	-0.43	-0.48	-0.53	-0.49	-0.5	-0.49
FAN_EMBRYONIC_CTX_BIG_GROUPS_GLIAL	1.89	2.63	0.87	0.66	1.19	2.65	0.2	1.5	1.03	0.42	1.2	0.99	2.91	1.65	1.66	1.92	1.48	-0.28	-0.42	0.31	0.4	-0.22	-0.26	-0.31	-0.39	-0.14	-0.41	-0.3	-0.41	-0.43	-0.5	-0.49	-0.41	-0.48	-0.44	-0.43	-0.48	-0.5	-0.45	-0.45	-0.46	-0.44	-0.48	-0.44	-0.46	-0.51	-0.43	-0.49	-0.48
MANNO_MIDBRAIN_NEUROTYPES_HPROGM	1.56	3.25	0.7	0.9	0.98	3.11	0.16	1.57	1.73	0.64	2.58	0.91	3.27	1.35	2.12	1.81	2.33	0.12	0.03	0.27	0.35	-0.5	-0.19	-0.37	-0.33	0.14	-0.48	-0.38	-0.3	-0.41	-0.44	-0.43	-0.45	-0.32	-0.34	-0.42	-0.4	-0.38	-0.39	-0.39	-0.41	-0.37	-0.41	-0.4	-0.42	-0.46	-0.41	-0.36	-0.41
MANNO_MIDBRAIN_NEUROTYPES_HPROGBP	1.18	2.33	1.37	1.05	1.09	2.86	0.25	1.73	1.72	0.54	1.15	1.46	2.54	0.8	1.87	1.3	2.08	-0.14	-0.33	-0.2	0.61	-0.53	-0.36	-0.46	-0.31	0.32	-0.52	-0.31	-0.26	-0.4	-0.46	-0.4	-0.49	-0.35	-0.41	-0.5	-0.42	-0.46	-0.47	-0.42	-0.46	-0.42	-0.45	-0.43	-0.43	-0.46	-0.37	-0.39	-0.39
MANNO_MIDBRAIN_NEUROTYPES_HPROGFPL	0.99	2.6	1.18	1.4	1.26	3.71	0.07	1.45	1.39	0.69	1.08	1.58	3.49	0.81	1.92	1.51	2.51	0.02	-0.24	0.09	0.56	-0.52	-0.38	-0.46	-0.29	0.35	-0.58	-0.3	-0.19	-0.42	-0.41	-0.41	-0.49	-0.31	-0.34	-0.45	-0.4	-0.4	-0.43	-0.39	-0.42	-0.38	-0.4	-0.41	-0.41	-0.44	-0.34	-0.37	-0.39
MANNO_MIDBRAIN_NEUROTYPES_HPROGFPM	0.88	2.34	1.26	1.24	1.35	4.03	0.08	1.39	2.01	0.69	2.27	1.65	3.55	0.98	1.78	2.25	2.79	0.19	-0.29	0.14	0.7	-0.55	-0.4	-0.52	-0.24	0.39	-0.43	-0.17	-0.19	-0.38	-0.41	-0.37	-0.49	-0.33	-0.35	-0.41	-0.38	-0.37	-0.45	-0.39	-0.45	-0.39	-0.38	-0.39	-0.39	-0.48	-0.38	-0.38	-0.39
HU_FETAL_RETINA_RGC	1.51	1.65	0.72	1.85	1.22	3.96	0.56	1.64	1.73	0.99	1.72	1.94	7.44	1.23	2.49	2.41	1.59	0.71	0.35	0	-0.03	-0.31	0.01	-0.36	-0.22	-0.11	-0.48	-0.27	-0.4	-0.37	-0.46	-0.6	-0.46	-0.52	-0.59	-0.5	-0.47	-0.45	-0.43	-0.5	-0.57	-0.49	-0.51	-0.46	-0.38	-0.6	-0.53	-0.49	-0.47
MURARO_PANCREAS_ALPHA_CELL	2.19	2.94	0.69	1.4	0.88	3.26	0.58	1.65	0.95	0.78	1.14	1.36	5.72	1.09	1.95	2.17	1.3	-0.16	-0.29	-0.05	0.23	-0.18	-0.06	-0.32	-0.31	-0.21	-0.28	-0.43	-0.46	-0.37	-0.44	-0.43	-0.44	-0.43	-0.44	-0.5	-0.44	-0.42	-0.42	-0.45	-0.51	-0.41	-0.51	-0.45	-0.4	-0.5	-0.46	-0.49	-0.45
MANNO_MIDBRAIN_NEUROTYPES_HNBM	1.46	2.33	1.49	0.71	2.86	4.75	0.66	2.37	2.49	0.39	1.77	1.94	6.58	1.57	2.73	1.88	1.97	0.09	-0.22	0.08	-0.32	-0.59	0.18	-0.15	-0.16	-0.15	-0.58	-0.05	-0.62	-0.39	-0.6	-0.55	-0.64	-0.4	-0.56	-0.48	-0.45	-0.47	-0.5	-0.53	-0.58	-0.44	-0.56	-0.54	-0.54	-0.58	-0.49	-0.59	-0.58
HU_FETAL_RETINA_RPC	1.41	2.46	-0.05	0.79	0.76	1.32	0.55	1.72	1.86	0.87	1.06	1	2.37	0.77	1.83	1.84	2.51	-0.19	-0.23	-0.13	0.76	-0.13	-0.08	-0.15	-0.21	0.12	-0.47	-0.26	-0.24	-0.34	-0.23	-0.05	-0.5	-0.24	-0.34	-0.32	-0.31	-0.21	-0.24	-0.3	-0.28	-0.14	-0.19	-0.25	-0.34	-0.29	-0.17	-0.36	0.05
CUI_DEVELOPING_HEART_SMOOTH_MUSCLE_CELL	1.59	1.86	1.11	-0.31	1.99	2.81	-0.25	0.24	2.76	1.22	2.55	2.66	4.4	0.89	1.64	2.18	0.96	1.54	1.55	1.52	0.37	-0.54	-0.43	0.9	-0.05	-0.1	-0.39	-0.46	-0.46	-0.42	-0.43	-0.39	-0.54	-0.47	-0.52	-0.5	-0.43	-0.47	-0.48	-0.49	-0.48	-0.46	-0.51	-0.51	-0.51	-0.54	-0.49	-0.47	-0.46
GAUTAM_EYE_IRIS_CILIARY_BODY_CILIARY_BODY_CELLS	2.07	2.58	0.14	0.31	0.21	1.15	-0.17	0.58	1.16	0.55	2.06	2.27	3.83	0.96	0.3	1.34	0.89	1.21	1.16	0.06	0.38	-0.55	-0.47	-0.42	-0.47	-0.41	-0.45	-0.62	-0.46	-0.47	-0.59	-0.58	-0.59	-0.57	-0.56	-0.58	-0.51	-0.55	-0.56	-0.57	-0.58	-0.51	-0.53	-0.56	-0.55	-0.6	-0.57	-0.55	-0.54
VANGURP_PANCREATIC_DELTA_CELL	-0.03	1.6	1.14	1.55	0.71	3.35	-0.14	0.82	1.55	1.33	2.05	1.91	4.42	1.32	0.43	2.05	2.12	1.49	1.47	0.05	0.58	-0.44	-0.43	-0.38	-0.45	-0.31	-0.56	-0.42	-0.51	-0.49	-0.58	-0.57	-0.57	-0.48	-0.55	-0.58	-0.55	-0.56	-0.57	-0.54	-0.57	-0.52	-0.52	-0.55	-0.51	-0.6	-0.52	-0.49	-0.59
AIZARANI_LIVER_C34_MHC_II_POS_B_CELLS	0.33	1.21	0.15	1.8	0.26	2.35	0.16	2.81	1.12	0.46	1.44	2.67	4.74	0.48	2.42	1.27	1.37	-0.27	-0.34	0.08	-0.08	-0.44	-0.59	-0.45	-0.07	-0.06	0.09	-0.04	-0.32	-0.2	-0.38	-0.57	-0.44	-0.29	-0.21	-0.45	-0.38	-0.39	-0.5	-0.4	-0.45	-0.39	-0.42	-0.45	-0.42	-0.53	-0.46	-0.46	-0.39
TRAVAGLINI_LUNG_B_CELL	0.17	0.86	0.36	0.96	0.79	1.86	0.45	2.05	0.49	0.64	0.82	3.63	3.09	1.04	2.32	2.54	1.44	-0.17	-0.36	-0.26	-0.02	-0.4	-0.67	-0.16	0.2	0.02	-0.19	0.06	-0.39	-0.26	-0.16	-0.49	-0.45	-0.17	-0.45	-0.46	-0.44	-0.46	-0.58	-0.44	-0.54	-0.39	-0.4	-0.44	-0.4	-0.46	-0.39	-0.51	-0.43
DESCARTES_MAIN_FETAL_ERYTHROBLASTS	0.24	1.05	0.21	1.53	0.94	2.96	0.39	1.68	1.68	0.28	1.79	2.06	4.48	1.25	3.37	3.07	2.08	0.04	-0.18	-0.59	0.65	-0.54	-1.1	-0.27	-0.05	0.18	0	0.1	0.07	-0.21	-0.33	-0.39	-0.4	-0.2	-0.4	-0.32	-0.35	-0.25	-0.32	-0.34	-0.33	-0.19	-0.28	-0.33	-0.32	-0.45	-0.35	-0.41	-0.33
MANNO_MIDBRAIN_NEUROTYPES_HNPROG	0.56	1.33	1.5	0.92	1.61	3.63	0.53	2.56	2.93	1.65	2.28	2.82	5.17	1.89	4.72	3.1	1.78	0.3	-0.05	0.34	1.53	-0.55	-0.3	-0.42	-0.22	0.21	-0.46	0.2	-0.27	-0.36	-0.39	-0.5	-0.56	-0.32	-0.44	-0.39	-0.39	-0.45	-0.38	-0.44	-0.48	-0.47	-0.52	-0.42	-0.48	-0.54	-0.49	-0.5	-0.43
HAY_BONE_MARROW_PRO_B	0.46	1.4	0.73	2.09	1.22	3.97	0.89	2.58	2.8	0.36	1.61	2.54	3.86	1.19	1.89	2.16	1.44	-0.06	-0.38	0.14	0.82	-0.46	-0.25	-0.4	0	0.22	-0.35	-0.04	0.05	-0.2	-0.41	-0.25	-0.36	-0.19	-0.25	-0.31	-0.18	-0.21	-0.36	-0.42	-0.3	-0.16	-0.32	-0.29	-0.26	-0.37	-0.26	-0.26	-0.22
ZHONG_PFC_C1_MICROGLIA	0.38	1.13	0.11	1.92	1.33	3.01	0.6	2.02	2.58	1.02	1.37	2.44	3.62	1.15	2.23	2.31	0.96	0	-0.25	0.17	0.53	-0.43	-0.05	-0.21	0.2	0.15	-0.5	-0.11	0.28	-0.28	-0.25	-0.02	-0.22	-0.06	-0.25	-0.23	-0.02	-0.05	-0.16	0.04	-0.19	0.06	-0.11	-0.07	-0.05	-0.19	0	-0.18	-0.02
TRAVAGLINI_LUNG_PROLIFERATING_NK_T_CELL	0.4	1.92	0.26	1.28	0.86	2.34	0.1	2.29	2.05	0.18	1.52	1.54	3.99	0.03	2.57	2.13	0.5	-0.17	-0.42	-0.38	0.61	-0.55	-0.31	-0.39	-0.06	0.12	-0.57	-0.08	0.01	-0.3	-0.39	-0.09	-0.41	-0.23	-0.34	-0.25	-0.2	-0.24	-0.24	-0.16	-0.28	-0.23	-0.23	-0.28	-0.22	-0.23	-0.2	-0.25	-0.22
FAN_EMBRYONIC_CTX_NSC_2	-0.06	0.59	0.59	0.74	1.51	2.17	0.35	1.23	3.41	0.9	3.35	3.15	4.19	1.45	1.51	2.55	1.55	0.36	-0.33	0.18	0.78	-0.53	-0.6	-0.61	-0.09	0.45	-0.43	0.05	0.12	-0.31	-0.3	-0.27	-0.44	-0.28	-0.3	-0.35	-0.33	-0.32	-0.37	-0.26	-0.35	-0.29	-0.35	-0.33	-0.37	-0.46	-0.37	-0.34	-0.34
ZHONG_PFC_C1_OPC	0.31	1.47	0.59	0.86	1.37	2.87	0.29	1.13	3.03	0.84	3.28	2.31	3.52	1.7	2.12	2.82	1.84	0.31	-0.25	0.12	1.22	-0.09	-0.39	-0.14	-0.09	0.51	-0.19	0.05	0.16	-0.33	-0.48	-0.13	-0.44	-0.29	-0.25	-0.4	-0.27	-0.35	-0.44	-0.32	-0.36	-0.32	-0.33	-0.32	-0.35	-0.44	-0.3	-0.37	-0.28
ZHONG_PFC_MAJOR_TYPES_NPCS	0.11	1.99	1.55	1.11	1.49	2.85	0.09	2.46	3.84	0.74	2.71	1.67	4.07	0.86	2.4	2.45	2.45	0.07	-0.33	-0.73	0.45	-0.51	-0.47	-0.42	-0.16	0.3	-0.41	0.05	-0.11	-0.41	-0.36	-0.3	-0.53	-0.27	-0.35	-0.35	-0.28	-0.38	-0.43	-0.3	-0.36	-0.36	-0.34	-0.4	-0.41	-0.45	-0.31	-0.39	-0.31
DESCARTES_FETAL_SPLEEN_MYELOID_CELLS	1.26	2.47	0.54	3.49	1.1	3.23	0.16	1.42	3.1	-0.14	0.45	0.65	5.98	2.45	3.26	0.97	0.01	0	-0.2	-0.22	0.2	-0.41	-0.56	-0.18	-0.34	-0.29	-0.33	0.14	-0.43	-0.34	-0.39	-0.37	-0.47	-0.45	-0.43	-0.51	-0.32	-0.24	-0.44	-0.34	-0.5	-0.32	-0.37	-0.46	-0.41	-0.43	-0.44	-0.39	-0.35
DESCARTES_MAIN_FETAL_SATB2_LRRC7_POSITIVE_CELLS	0.49	1.73	0.8	1.96	0.88	3.53	-0.01	0.82	1.72	0.96	0.99	1.03	5.1	0.6	3.34	0.71	0.73	-0.2	-0.26	-0.26	0.03	-0.4	-0.47	-0.13	-0.22	-0.18	-0.27	-0.21	-0.03	-0.28	-0.3	-0.53	-0.26	-0.29	-0.48	-0.39	-0.25	-0.36	-0.38	-0.32	-0.48	-0.32	-0.45	-0.32	-0.35	-0.26	-0.38	-0.45	-0.29
DESCARTES_FETAL_PANCREAS_ISLET_ENDOCRINE_CELLS	0.94	1.11	-0.02	3.39	1.35	2.54	1.18	1.02	1.04	-0.44	0.93	0.34	3.15	0.37	2.17	0.65	0.94	0.01	-0.02	-0.13	0.13	-0.4	-0.52	-0.22	-0.46	-0.24	-0.24	-0.42	-0.41	-0.26	-0.43	-0.15	-0.45	-0.23	-0.34	-0.32	-0.37	-0.31	-0.34	-0.37	-0.43	-0.34	-0.35	-0.4	-0.39	-0.44	-0.46	-0.42	-0.41
DESCARTES_FETAL_HEART_STROMAL_CELLS	1.73	2.9	-0.05	3.04	1.42	4.24	1.06	3.1	1.43	-0.21	-0.01	-0.41	4.26	-0.35	2.66	3.08	1.5	0.09	-0.14	0.18	-0.28	-0.48	-0.53	-0.21	-0.25	-0.36	-0.38	0.63	-0.39	-0.36	-0.42	-0.55	-0.41	-0.37	-0.34	-0.42	-0.32	-0.32	-0.47	-0.43	-0.45	-0.45	-0.34	-0.37	-0.41	-0.46	-0.37	-0.34	-0.33
DESCARTES_FETAL_INTESTINE_CHROMAFFIN_CELLS	1.14	2.6	0.06	4.23	1.44	2.54	0.63	2.78	1.89	-0.41	0.56	0.68	3.65	0.15	3.37	2.45	0.07	-0.23	-0.01	0.52	0.43	-0.27	-0.07	-0.37	-0.26	-0.13	-0.25	-0.3	-0.35	-0.36	-0.37	-0.45	-0.28	-0.19	-0.26	-0.37	-0.18	-0.19	-0.3	-0.28	-0.43	-0.36	-0.35	-0.34	-0.28	-0.43	-0.46	-0.31	-0.31
DESCARTES_MAIN_FETAL_RETINAL_PIGMENT_CELLS	0.28	0.28	0.03	3.91	0.77	2.24	0.88	2.61	2.15	-0.12	0.19	1.66	5.95	0.51	3.28	3.4	1.47	-0.48	-0.41	-0.55	-0.23	-0.31	-0.35	-0.19	-0.4	-0.29	0.22	-0.63	-0.21	-0.28	-0.34	-0.39	-0.37	-0.35	-0.31	-0.36	-0.37	-0.31	-0.35	-0.3	-0.48	-0.38	-0.26	-0.27	-0.25	-0.37	-0.46	-0.28	-0.39
LAKE_ADULT_KIDNEY_C21_COLLECTING_DUCT_INTERCALATED_CELLS_TYPE_B	0.64	2.05	0.65	4.28	1.45	5	0.61	4.97	4.03	1.13	2.9	0.83	5.69	0.74	4.14	4.82	2.86	-0.1	-0.23	0.2	-0.04	-0.56	-0.34	-0.34	-0.23	-0.19	-0.62	-0.52	-0.33	-0.39	-0.37	-0.48	-0.48	-0.33	-0.46	-0.49	-0.43	-0.36	-0.4	-0.38	-0.39	-0.4	-0.41	-0.41	-0.46	-0.43	-0.4	-0.35	-0.36
ZHONG_PFC_C4_PTGDS_POS_OPC	0.84	0.82	0.07	4.21	0.96	3.6	0.6	2.74	2.59	0.27	1.02	0.85	4.72	0.21	3.15	2.2	1.22	-0.35	-0.4	-0.31	0.5	-0.29	-0.34	-0.29	0.07	0.04	-0.31	-0.74	-0.37	-0.33	-0.43	-0.31	-0.53	-0.38	-0.33	-0.43	-0.55	-0.35	-0.36	-0.4	-0.45	-0.39	-0.39	-0.39	-0.33	-0.46	-0.53	-0.41	-0.38
ZHONG_PFC_C7_ORG_UNDERGOING_NEURONAL_DIFFERENTIATION	0.15	0.15	0.05	4.97	0.59	3.75	0.26	3.66	1.03	0.75	1.66	0.73	4.93	0.57	2.96	2.05	0.23	-0.12	-0.18	0.56	-0.4	-0.25	-0.48	-0.16	0.02	-0.17	-0.38	-0.42	-0.44	-0.32	-0.44	-0.4	-0.46	-0.33	-0.42	-0.27	-0.38	-0.22	-0.3	-0.29	-0.38	-0.35	-0.37	-0.33	-0.37	-0.33	-0.31	-0.25	-0.27
DESCARTES_MAIN_FETAL_PDE1C_ACSM3_POSITIVE_CELLS	0.11	0.83	1.28	1.33	0.54	4.9	0.18	1.87	0.46	1.15	1.39	1.88	4.26	1.1	2.47	2.53	0.55	-0.07	-0.01	-0.02	0.01	-0.55	-1.19	-0.21	-0.08	-0.11	-0.3	-0.79	-0.14	-0.29	-0.55	-0.5	-0.41	-0.4	-0.62	-0.43	-0.42	-0.46	-0.52	-0.4	-0.51	-0.47	-0.51	-0.48	-0.45	-0.52	-0.37	-0.35	-0.45
BUSSLINGER_GASTRIC_PARIETAL_CELLS	1.74	3.16	0.55	4.85	1.87	2.99	1.13	2.91	2.26	1	2.55	2.25	7.46	1.87	3.3	2.29	4.2	0.02	-0.26	0.62	1.2	-0.09	-0.44	-0.58	-0.3	0.68	-0.26	-0.75	-0.1	-0.3	-0.63	-0.67	-0.53	-0.5	-0.58	-0.65	-0.61	-0.6	-0.6	-0.64	-0.65	-0.64	-0.65	-0.57	-0.62	-0.73	-0.72	-0.65	-0.64
DESCARTES_FETAL_LIVER_HEPATOBLASTS	0.71	1.89	-0.03	2.11	0.85	1.55	0.63	1.83	0.64	0.01	1.65	0.6	4.16	1.46	1.22	1.53	1.46	0.08	-0.03	-0.3	0.3	-0.48	-0.47	-0.38	-0.31	-0.3	-0.62	-0.47	-0.39	-0.41	-0.58	-0.52	-0.5	-0.52	-0.46	-0.54	-0.57	-0.52	-0.55	-0.53	-0.58	-0.57	-0.56	-0.53	-0.53	-0.63	-0.59	-0.55	-0.5
DURANTE_ADULT_OLFACTORY_NEUROEPITHELIUM_MATURE_NEURONS	1.17	1.67	0.41	2.91	1.01	2.04	0.41	0.92	0.7	0.26	1.51	1.19	4.13	1.47	1.47	1.86	0.98	0.04	-0.21	0.17	-0.15	0.14	0.09	-0.23	-0.37	-0.39	-0.63	-0.03	-0.5	-0.38	-0.51	-0.69	-0.58	-0.51	-0.57	-0.66	-0.53	-0.51	-0.62	-0.55	-0.64	-0.52	-0.65	-0.59	-0.54	-0.67	-0.63	-0.61	-0.61
BUSSLINGER_GASTRIC_G_CELLS	0.98	1.58	0.54	5.36	2.09	3.49	0.35	3.16	2.55	1.48	2.74	1.57	4.9	2.13	2.21	1.98	1.74	0.16	-0.29	0.44	-0.03	-0.27	-0.63	-0.15	-0.24	-0.27	-0.37	-0.51	-0.28	-0.38	-0.42	-0.46	-0.43	-0.39	-0.38	-0.43	-0.45	-0.38	-0.35	-0.36	-0.44	-0.43	-0.38	-0.39	-0.43	-0.45	-0.45	-0.39	-0.39
GAUTAM_EYE_IRIS_CILIARY_BODY_PIGMENTED_CILIARY_BODY_CELLS	1.08	2.15	0.26	3.43	1.02	3.8	0	4.34	1.65	2.43	2.86	0.6	5.47	1.89	3.24	2.07	1.6	-0.21	-0.12	-0.18	0.54	0.36	-0.3	-0.17	-0.22	-0.12	-0.16	-0.5	-0.27	-0.26	-0.47	-0.48	-0.39	-0.45	-0.47	-0.42	-0.38	-0.45	-0.42	-0.38	-0.43	-0.42	-0.45	-0.41	-0.35	-0.45	-0.42	-0.38	-0.39
DESCARTES_FETAL_HEART_ERYTHROBLASTS	0.31	1.19	0.88	2.03	0.85	2.33	0.73	1.86	1.01	-0.2	1.35	1.51	3.14	0.7	0.71	0.86	1.41	0.11	-0.02	-0.58	0.2	-0.43	-0.44	-0.03	-0.1	-0.05	-0.29	-0.27	-0.13	-0.28	-0.57	-0.5	-0.32	-0.28	-0.24	-0.28	-0.33	-0.38	-0.31	-0.44	-0.45	-0.3	-0.36	-0.35	-0.33	-0.39	-0.35	-0.41	-0.41
HAY_BONE_MARROW_ERYTHROBLAST	0.93	1.98	0.76	2.4	1.41	3.17	1.26	2.22	1.03	0.02	3.32	2.22	5.18	1.33	1.36	1.28	1.86	0.2	0.01	-0.42	0.27	-0.49	-0.39	-0.4	0.13	0.18	-0.69	-0.4	0.01	-0.25	-0.36	-0.43	-0.2	-0.1	-0.27	-0.28	-0.22	-0.23	-0.2	-0.12	-0.34	-0.15	-0.21	-0.2	-0.12	-0.3	-0.27	-0.28	-0.19
AIZARANI_LIVER_C1_NK_NKT_CELLS_1	0.41	0.58	2.64	3.06	1.28	3.29	0.03	2.55	0.42	0.74	2.82	2.04	4.54	0.47	2.36	2.01	0.77	-0.01	-0.25	-0.16	0.01	-0.57	-0.7	-0.32	-0.21	0.02	-0.39	-0.38	-0.41	-0.31	-0.25	-0.37	-0.42	-0.37	-0.37	-0.41	-0.56	-0.24	-0.41	-0.4	-0.45	-0.36	-0.45	-0.4	-0.41	-0.43	-0.34	-0.36	-0.28
DESCARTES_FETAL_THYMUS_THYMIC_EPITHELIAL_CELLS	0.42	0.71	0.85	2.23	1.55	4.16	0.64	1.95	0.62	0.32	2.6	1.52	6.73	1.34	3.54	3.47	1.84	-0.25	-0.25	-0.37	0.56	-0.41	-0.64	-0.34	-0.32	-0.17	-0.42	-0.43	-0.34	-0.39	-0.47	-0.47	-0.46	-0.35	-0.37	-0.41	-0.42	-0.36	-0.38	-0.39	-0.45	-0.38	-0.46	-0.4	-0.37	-0.38	-0.44	-0.41	-0.44
TRAVAGLINI_LUNG_CD8_NAIVE_T_CELL	0.49	2.04	0.9	2.37	1.06	3.58	0.13	2.42	0.66	0.49	4.07	1.44	5.55	0.66	2.6	1.72	1.59	-0.14	-0.26	-0.57	1.37	-0.54	-0.42	-0.23	-0.34	-0.14	-0.23	-0.48	-0.36	-0.35	-0.47	-0.39	-0.52	-0.44	-0.36	-0.43	-0.47	-0.36	-0.4	-0.46	-0.43	-0.41	-0.47	-0.41	-0.43	-0.35	-0.41	-0.49	-0.4
AIZARANI_LIVER_C30_HEPATOCYTES_4	0.59	2.17	0.39	3.08	1.5	4.93	0.32	1.91	2.03	0.79	3.43	3.2	5.21	1.07	2.99	3.18	2.59	-0.05	-0.29	-0.23	0.66	-0.37	-0.65	-0.35	-0.17	-0.27	-0.23	-0.24	-0.39	-0.34	-0.5	-0.38	-0.44	-0.19	-0.34	-0.34	-0.41	-0.42	-0.32	-0.35	-0.4	-0.3	-0.32	-0.36	-0.3	-0.41	-0.37	-0.33	-0.29
LAKE_ADULT_KIDNEY_C20_COLLECTING_DUCT_INTERCALATED_CELLS_TYPE_A_CORTEX	0.7	1.03	0.31	4.22	1.99	5.28	0.88	2.37	2.18	0.13	3.97	2.02	5.62	2.96	3.24	3.68	2.37	0.13	-0.25	-0.02	0.76	-0.38	-0.43	-0.29	-0.2	-0.04	-0.5	-0.52	-0.3	-0.29	-0.42	-0.37	-0.39	-0.29	-0.36	-0.31	-0.35	-0.34	-0.32	-0.29	-0.37	-0.35	-0.36	-0.36	-0.39	-0.34	-0.31	-0.33	-0.35
BUSSLINGER_GASTRIC_X_CELLS	0.31	1.51	0.56	2.67	1.34	4.48	0.12	2.43	2.84	1.35	3.42	2.23	5.37	1.72	2.39	3.05	1.83	0.61	0.23	0.49	-0.35	-0.46	-0.08	-0.32	-0.3	-0.48	-0.53	-0.44	-0.33	-0.37	-0.44	-0.64	-0.54	-0.43	-0.53	-0.59	-0.5	-0.45	-0.45	-0.58	-0.58	-0.51	-0.58	-0.5	-0.47	-0.56	-0.57	-0.45	-0.49
GAUTAM_EYE_CHOROID_SCLERA_CHOROID_ENDOTHELIAL_CELLS	1.7	1.16	0.49	2.28	0.42	3.94	-0.05	3.16	1.89	0.47	2.56	2.06	4.84	0.92	2.1	2.31	1.63	-0.28	-0.25	0.25	-0.32	-0.55	-0.37	-0.48	-0.43	-0.25	-0.45	-0.78	-0.36	-0.34	-0.39	-0.65	-0.46	-0.47	-0.53	-0.5	-0.5	-0.49	-0.52	-0.59	-0.58	-0.55	-0.54	-0.52	-0.51	-0.54	-0.6	-0.47	-0.48
BUSSLINGER_ESOPHAGEAL_QUIESCENT_BASAL_CELLS	0.68	2.09	0.81	3.81	0.59	4.36	0.08	1.99	2.6	1.93	2.71	1.99	4.31	0.74	2.53	2.14	1.9	0.01	-0.08	-0.46	0.54	-0.41	-0.63	-0.33	-0.38	-0.27	-0.14	-0.58	-0.21	-0.29	-0.26	-0.38	-0.46	-0.35	-0.38	-0.43	-0.55	-0.3	-0.35	-0.4	-0.37	-0.38	-0.38	-0.41	-0.39	-0.45	-0.44	-0.33	-0.19
LAKE_ADULT_KIDNEY_C2_PODOCYTES	0.41	2.1	1.14	2.52	0.64	3.5	-0.12	1.69	1.76	1.24	2.07	1.31	4.12	1.36	1.9	1.77	1.42	-0.24	-0.29	0.14	0.15	-0.47	-0.53	-0.41	-0.18	-0.26	-0.45	-0.56	-0.45	-0.43	-0.51	-0.47	-0.48	-0.44	-0.49	-0.51	-0.41	-0.42	-0.45	-0.46	-0.52	-0.45	-0.45	-0.45	-0.46	-0.48	-0.46	-0.48	-0.46
BUSSLINGER_GASTRIC_OXYNTIC_ENTEROCHROMAFFIN_LIKE_CELLS	0.42	1.31	1.24	1.82	1.02	2.18	0.15	1.79	1.7	0.96	2.01	2.32	4.09	0.65	0.37	1.92	0.67	0.24	-0.04	-0.1	-0.3	-0.48	-0.62	-0.42	-0.32	-0.36	-0.49	-0.28	-0.36	-0.42	-0.46	-0.37	-0.43	-0.43	-0.4	-0.45	-0.43	-0.44	-0.45	-0.45	-0.51	-0.48	-0.44	-0.45	-0.48	-0.48	-0.47	-0.36	-0.45
AIZARANI_LIVER_C3_NK_NKT_CELLS_2	0.93	1.34	0.96	3.43	1.06	4.84	0.15	2.06	1.98	2.1	4.04	2.79	6.73	0.74	1.86	2.49	0.89	0.52	0.19	0.01	-0.03	-0.41	-0.81	-0.34	-0.1	0.18	-0.17	-0.33	-0.17	-0.34	-0.36	-0.44	-0.27	-0.31	-0.5	-0.51	-0.41	-0.34	-0.47	-0.41	-0.45	-0.51	-0.45	-0.37	-0.39	-0.51	-0.42	-0.22	-0.43
RUBENSTEIN_SKELETAL_MUSCLE_PCV_ENDOTHELIAL_CELLS	0.95	1	0.81	3.5	1.24	4.22	0.12	2.43	1.11	1.2	3.23	2.65	6.03	0.72	2.11	3.09	2.02	0.27	0.08	-0.32	-0.09	-0.59	-0.84	-0.32	-0.26	0.05	-0.2	-0.32	-0.41	-0.3	-0.1	-0.42	-0.45	-0.34	-0.44	-0.57	-0.51	-0.3	-0.42	-0.48	-0.45	-0.38	-0.48	-0.46	-0.43	-0.48	-0.49	-0.46	-0.34
GAUTAM_EYE_IRIS_CILIARY_BODY_MELANOCYTES	0.46	0.58	0.48	2.48	0.61	2.62	0.43	1.39	1.16	1.09	2.8	3.28	4.6	1.08	1.34	2.31	1.2	0.15	-0.16	-0.27	0.06	-0.66	-0.61	-0.54	-0.26	-0.35	-0.45	-0.7	-0.43	-0.36	-0.39	-0.54	-0.54	-0.46	-0.5	-0.58	-0.53	-0.5	-0.56	-0.54	-0.59	-0.55	-0.53	-0.51	-0.56	-0.58	-0.53	-0.51	-0.5
GAUTAM_EYE_IRIS_CILIARY_BODY_MGP_HIGH_FIBROBLASTS	0.63	1.25	0.1	2.18	1.17	2.76	-0.02	1.34	1.45	0.86	2.25	2.35	4.56	0.77	1.19	1.62	0.34	-0.19	-0.33	0.65	-0.01	-0.53	-0.14	-0.24	-0.35	-0.27	-0.45	-0.47	-0.46	-0.37	-0.52	-0.55	-0.46	-0.44	-0.51	-0.51	-0.46	-0.5	-0.44	-0.51	-0.47	-0.44	-0.53	-0.46	-0.49	-0.49	-0.45	-0.47	-0.46
GAUTAM_EYE_IRIS_CILIARY_BODY_WIF1_HIGH_FIBROBLASTS	0.31	1.17	0.3	3.49	1.8	3.92	0.04	1.55	3.04	2.29	2.85	3.53	6.51	1.11	2.46	3.13	2.33	-0.06	-0.36	0.63	-0.06	-0.53	-0.76	-0.42	-0.39	-0.2	-0.4	-0.56	-0.3	-0.29	-0.39	-0.54	-0.47	-0.41	-0.46	-0.61	-0.36	-0.44	-0.34	-0.46	-0.42	-0.44	-0.4	-0.41	-0.38	-0.5	-0.48	-0.4	-0.31
HAY_BONE_MARROW_NAIVE_T_CELL	0.41	1.06	0.29	4.33	1.86	4.77	0.42	2.71	2.62	2.43	2.77	3.21	6.44	0.52	2.1	3.03	1.86	-0.13	-0.07	1.05	-0.14	-0.66	-0.95	-0.41	0.01	-0.04	-0.02	-0.48	-0.1	-0.25	-0.21	-0.48	-0.46	-0.33	-0.52	-0.44	-0.34	-0.48	-0.43	-0.59	-0.55	-0.54	-0.49	-0.48	-0.47	-0.61	-0.57	-0.42	-0.44
GAUTAM_EYE_IRIS_CILIARY_BODY_CILIARY_BODY_ENDOTHELIAL_CELLS	0.76	2.47	0.67	5.71	1.46	5.34	0.58	1.47	1.08	1.12	2.25	3.94	6.4	1.94	2.43	2.88	2.67	0.15	-0.01	-0.03	0.3	-0.33	-1.03	-0.33	-0.09	0.13	-0.08	-0.17	-0.23	-0.25	-0.44	-0.3	-0.47	-0.3	-0.38	-0.36	-0.31	-0.36	-0.26	-0.35	-0.39	-0.3	-0.42	-0.35	-0.3	-0.37	-0.42	-0.37	-0.26
LAKE_ADULT_KIDNEY_C23_ENDOTHELIAL_CELLS_AVR	0.61	1.25	0.27	3.4	0.24	2.63	-0.11	1.77	0.16	0.84	1.84	2.02	4.79	0.61	1.11	1.47	1.83	-0.22	-0.18	-0.7	-0.18	-0.65	-0.5	-0.35	-0.4	-0.23	-0.26	-0.42	-0.44	-0.33	-0.36	-0.5	-0.41	-0.32	-0.38	-0.41	-0.55	-0.35	-0.51	-0.43	-0.42	-0.38	-0.4	-0.42	-0.41	-0.41	-0.44	-0.43	-0.33
MURARO_PANCREAS_BETA_CELL	0.5	2.17	0.09	4.14	1.71	4.59	0.55	3.55	2.22	1.47	3.37	3.41	7.83	1.66	2.35	2.28	2.71	0.1	-0.22	-0.15	0.15	-0.48	-0.24	-0.32	-0.13	0	-0.4	-0.51	-0.16	-0.27	-0.54	-0.59	-0.47	-0.33	-0.5	-0.52	-0.49	-0.36	-0.48	-0.39	-0.58	-0.37	-0.51	-0.49	-0.4	-0.5	-0.53	-0.45	-0.38
TRAVAGLINI_LUNG_ALVEOLAR_FIBROBLAST_CELL	1.69	2.57	0.8	3.79	1.46	3.9	0.54	2.87	1.71	0.73	2.52	2.04	6.48	1.09	2.63	1.97	2.29	0	-0.03	-0.24	0.02	-0.42	-0.57	-0.32	-0.3	-0.03	-0.33	-0.49	-0.43	-0.4	-0.48	-0.45	-0.42	-0.44	-0.43	-0.46	-0.48	-0.44	-0.49	-0.4	-0.46	-0.45	-0.44	-0.44	-0.47	-0.49	-0.43	-0.47	-0.44
DESCARTES_MAIN_FETAL_MEGAKARYOCYTES	0.13	0.49	0.78	4.36	0.94	4.51	0.4	0.88	2.71	0.66	3.06	2.33	7.59	2.19	2	2.07	0.59	0.01	-0.22	0.21	0.27	-0.4	-0.24	-0.36	-0.12	0.11	0.04	-0.53	-0.27	-0.3	-0.36	-0.43	-0.41	-0.34	-0.27	-0.34	-0.31	-0.4	-0.3	-0.39	-0.42	-0.35	-0.33	-0.28	-0.34	-0.37	-0.39	-0.37	-0.28
HAY_BONE_MARROW_CD8_T_CELL	0.32	0.88	0.13	2.91	1.02	4.63	0.22	0.65	1.25	0.21	2.71	1.49	5.5	0.79	1.8	2.51	0.84	0	-0.07	-0.39	-0.16	-0.28	-0.25	-0.21	-0.22	-0.21	-0.48	-0.14	-0.45	-0.28	-0.44	-0.46	-0.44	-0.39	-0.38	-0.63	-0.46	-0.36	-0.46	-0.45	-0.48	-0.51	-0.5	-0.52	-0.44	-0.42	-0.46	-0.49	-0.4
AIZARANI_LIVER_C32_MVECS_3	0.42	0.73	0.63	3.94	1.29	2.55	0.14	1.91	1.25	1.42	3.18	1.65	6.87	0.58	2.03	1.3	1.8	0.52	0.23	-0.2	0.25	-0.55	-0.72	-0.14	-0.07	0.1	-0.48	-0.54	-0.33	-0.37	-0.47	-0.27	-0.59	-0.32	-0.38	-0.53	-0.58	-0.17	-0.36	-0.47	-0.35	-0.26	-0.44	-0.4	-0.36	-0.42	-0.39	-0.49	-0.39
TRAVAGLINI_LUNG_CD4_MEMORY_EFFECTOR_T_CELL	0.16	0.89	0.1	3.68	2.23	3.61	0.09	2.4	1.49	0.74	3.72	1.84	7.19	0.59	1.34	1.66	1.31	0.22	0.06	1.17	0.13	-0.48	-0.62	-0.12	-0.12	0.18	-0.27	-0.16	-0.32	-0.28	-0.13	-0.29	-0.42	-0.41	-0.51	-0.53	-0.54	-0.22	-0.24	-0.55	-0.29	-0.27	-0.43	-0.37	-0.36	-0.28	-0.32	-0.32	-0.3
GAUTAM_EYE_IRIS_CILIARY_BODY_ACTIVATED_T_CELLS	0.37	1.75	1.16	4.61	1.12	1.97	0.16	2.36	2.51	0.89	5.04	1.85	7.71	0.64	3.25	2.63	2.73	-0.15	-0.19	-0.53	-0.03	-0.48	-0.62	-0.45	-0.38	-0.37	-0.04	-0.36	-0.42	-0.35	-0.34	-0.53	-0.41	-0.37	-0.38	-0.5	-0.48	-0.45	-0.45	-0.46	-0.51	-0.49	-0.48	-0.4	-0.4	-0.53	-0.48	-0.38	-0.49
GAUTAM_EYE_IRIS_CILIARY_BODY_MEG3_HIGH_FIBROBLASTS	0.16	1.89	0.77	3.69	0.73	2.54	0.43	2.98	2.06	0.58	3.01	2.27	7.03	0.67	1.41	2.63	1.91	0.09	-0.07	0.39	0.12	-0.45	-0.55	-0.33	-0.38	-0.21	-0.3	-0.48	-0.34	-0.37	-0.3	-0.45	-0.34	-0.2	-0.4	-0.33	-0.42	-0.29	-0.27	-0.35	-0.39	-0.32	-0.33	-0.31	-0.39	-0.37	-0.43	-0.35	-0.31
BUSSLINGER_ESOPHAGEAL_PROLIFERATING_BASAL_CELLS	0.67	0.57	1.1	4.24	0.38	4	0.32	1.32	2.55	0.45	2.76	2.09	5.28	0.4	2.63	3.1	1.93	0.17	-0.17	1.26	1.12	-0.4	-0.02	-0.23	-0.11	0.06	-0.41	-0.07	-0.25	-0.24	-0.12	-0.21	-0.29	-0.03	-0.05	-0.2	-0.28	0.03	-0.03	-0.13	-0.16	0.02	-0.11	-0.12	-0.15	-0.19	-0.13	-0.16	0.01
FAN_EMBRYONIC_CTX_EX_4_EXCITATORY_NEURON	0.95	1.11	0.74	2.59	0.41	3.42	-0.02	1.75	1.61	-0.06	1.44	1.09	4.07	-0.09	1.65	2.63	0.51	-0.04	0.14	0.37	0.13	-0.49	-0.49	-0.35	-0.26	-0.16	-0.3	-0.33	-0.41	-0.35	-0.45	-0.52	-0.55	-0.38	-0.48	-0.35	-0.43	-0.41	-0.41	-0.37	-0.45	-0.34	-0.41	-0.41	-0.41	-0.39	-0.42	-0.46	-0.45
GOBP_PANCREAS_DEVELOPMENT	0.37	0.85	1.51	2.7	1.69	3.97	0.15	2.09	3.57	-0.3	2.75	1.7	4.04	0.2	2.34	0.75	1.59	0.23	-0.15	0.24	0.1	-0.5	-0.58	-0.38	-0.29	-0.12	-0.43	-0.56	-0.55	-0.46	-0.54	-0.58	-0.55	-0.47	-0.57	-0.53	-0.53	-0.51	-0.5	-0.47	-0.54	-0.5	-0.52	-0.53	-0.53	-0.53	-0.51	-0.51	-0.45
GAO_ESOPHAGUS_25W_C1_CILIATED_EPITHELIAL_CELLS	1.21	0.41	0.92	3.39	1.59	2.99	0.23	2.15	3.39	0.45	3.5	2.55	5.51	0.7	2.82	2.1	1.99	1.05	0.67	0.08	0.76	-0.45	-0.52	-0.05	-0.22	-0.06	-0.25	-0.07	-0.27	-0.3	-0.33	-0.41	-0.38	-0.31	-0.42	-0.37	-0.39	-0.33	-0.41	-0.37	-0.46	-0.31	-0.41	-0.36	-0.38	-0.34	-0.43	-0.46	-0.35
TRAVAGLINI_LUNG_MYOFIBROBLAST_CELL	0.16	0.78	1.46	3.68	1.56	4.71	0.28	3.22	2.93	0.31	3.12	1.84	5.65	0.57	2.72	3.24	3.48	1.06	0.54	-0.25	0.26	-0.28	-0.2	-0.25	-0.14	-0.03	-0.35	-0.07	-0.38	-0.33	-0.39	-0.33	-0.37	-0.22	-0.35	-0.39	-0.33	-0.31	-0.36	-0.28	-0.3	-0.37	-0.39	-0.39	-0.36	-0.36	-0.37	-0.25	-0.3
LAKE_ADULT_KIDNEY_C14_DISTAL_CONVOLUTED_TUBULE	0.24	0.85	0.27	3.68	1.9	5.33	0.55	2.27	1.22	0.57	2.74	1.58	3.09	1.39	1.67	2.24	1.76	-0.1	-0.2	-0.24	0.36	0.05	-0.62	-0.3	-0.28	0.02	-0.3	-0.66	-0.33	-0.33	-0.46	-0.39	-0.4	-0.29	-0.32	-0.42	-0.38	-0.3	-0.32	-0.34	-0.42	-0.33	-0.42	-0.3	-0.4	-0.31	-0.35	-0.3	-0.3
LAKE_ADULT_KIDNEY_C29_UNKNOWN_NOVEL_PT_CFH_POS_SUBPOPULATION_S2	-0.08	0.54	0.13	3.54	2.96	4.84	1.06	2.7	2.11	1.38	1.5	2.28	3.74	1.04	2.78	2.85	3.17	-0.2	-0.35	0.29	0.05	-0.3	-0.33	-0.33	-0.33	-0.27	-0.14	-0.33	-0.41	-0.34	-0.28	-0.44	-0.46	-0.37	-0.34	-0.43	-0.42	-0.38	-0.48	-0.43	-0.43	-0.39	-0.4	-0.41	-0.44	-0.49	-0.43	-0.36	-0.32
LAKE_ADULT_KIDNEY_C25_ENDOTHELIAL_CELLS_UNASSIGNED	0.44	1.43	0.96	3.69	2.95	4.54	0.31	1.67	2.58	0.11	0.74	0.77	3.59	0.43	2.48	3.18	0.96	-0.26	-0.18	-0.32	-0.03	-0.43	-0.51	-0.3	-0.3	-0.21	-0.46	-0.4	-0.35	-0.32	-0.39	-0.32	-0.37	-0.34	-0.41	-0.39	-0.38	-0.34	-0.35	-0.35	-0.38	-0.35	-0.37	-0.35	-0.37	-0.29	-0.4	-0.36	-0.34
MURARO_PANCREAS_PANCREATIC_POLYPEPTIDE_CELL	1.24	0.71	0.89	3.74	2.24	5.59	0.45	1.41	3.04	1.93	1.24	2.48	4.77	0.91	3.54	2.31	1.48	-0.14	-0.11	0.95	0.45	-0.42	0.22	-0.2	-0.03	0.2	-0.6	0.07	-0.24	-0.34	-0.46	-0.56	-0.57	-0.38	-0.47	-0.3	-0.45	-0.38	-0.35	-0.47	-0.53	-0.43	-0.55	-0.42	-0.37	-0.5	-0.47	-0.39	-0.51
GAO_ESOPHAGUS_25W_C4_FGFR1HIGH_EPITHELIAL_CELLS	0.66	0.53	0.74	1.64	2.21	5.61	0.3	2.6	0.5	0.94	2.25	1.71	7.19	0.99	1.41	2.16	2.68	-0.29	-0.31	0.22	-0.12	-0.48	-0.39	0.21	-0.13	0.09	-0.29	-0.51	-0.38	-0.4	-0.57	-0.43	-0.46	-0.42	-0.46	-0.42	-0.44	-0.43	-0.42	-0.42	-0.47	-0.42	-0.46	-0.43	-0.42	-0.42	-0.48	-0.44	-0.4
GAO_LARGE_INTESTINE_ADULT_CA_ENTEROENDOCRINE_CELLS	0.79	0.65	0.61	2.75	1.52	4.36	0.25	3.54	1.06	0.4	1.47	0.27	7.73	0.05	0.8	2.23	2.53	-0.04	-0.3	0.45	-0.02	-0.56	0.14	-0.38	-0.11	0.15	-0.63	-0.2	-0.37	-0.32	-0.57	-0.55	-0.65	-0.37	-0.58	-0.55	-0.53	-0.51	-0.52	-0.58	-0.63	-0.58	-0.61	-0.56	-0.56	-0.67	-0.56	-0.55	-0.53
MANNO_MIDBRAIN_NEUROTYPES_HDA1	0.95	2.21	0.6	3.5	3.3	8.43	1.3	4.1	2.36	0.7	1.99	1.34	7.67	0.9	3.55	3.05	3.13	-0.11	-0.21	0	0.32	-0.42	0.25	0	-0.08	-0.09	-0.29	0.03	-0.46	-0.39	-0.44	-0.45	-0.53	-0.35	-0.42	-0.49	-0.42	-0.4	-0.4	-0.42	-0.45	-0.4	-0.49	-0.39	-0.4	-0.46	-0.39	-0.43	-0.46
MANNO_MIDBRAIN_NEUROTYPES_HDA	1.22	1.8	0.6	3.43	2.81	9.26	1.58	5.21	1.93	1.25	2.48	2.36	8.43	0.68	3.49	3.13	3.05	0.07	-0.17	0.46	-0.24	-0.41	0.49	0	-0.2	-0.09	-0.49	0.06	-0.48	-0.29	-0.49	-0.51	-0.64	-0.31	-0.44	-0.47	-0.42	-0.4	-0.48	-0.48	-0.53	-0.35	-0.54	-0.46	-0.47	-0.52	-0.48	-0.47	-0.45
MANNO_MIDBRAIN_NEUROTYPES_HDA2	0.95	1.11	0.73	2.64	2.96	7.61	1.6	4.26	1.43	0.39	1.67	1.55	7.94	0.71	3.03	2.9	3.06	0.06	-0.12	0.15	0.15	-0.41	0.4	-0.24	-0.21	-0.19	-0.41	-0.09	-0.43	-0.34	-0.5	-0.54	-0.53	-0.33	-0.47	-0.59	-0.42	-0.39	-0.43	-0.41	-0.54	-0.42	-0.54	-0.43	-0.47	-0.53	-0.51	-0.51	-0.5
MANNO_MIDBRAIN_NEUROTYPES_HGABA	0.67	1.48	1.22	4.78	2.71	8.93	1.25	5.22	2.51	0.95	3.2	2.28	8.73	1.73	4.55	3.74	2.74	0.61	0.18	0.16	0.32	-0.4	0.26	0.02	-0.05	-0.14	-0.45	0.14	-0.43	-0.26	-0.48	-0.45	-0.49	-0.37	-0.35	-0.43	-0.37	-0.36	-0.44	-0.38	-0.49	-0.35	-0.47	-0.39	-0.37	-0.48	-0.41	-0.42	-0.41
MANNO_MIDBRAIN_NEUROTYPES_HNBGABA	1.79	2.47	0.44	3.96	3.03	7.54	1.3	4.63	2.96	0.4	0.5	2.01	8.38	0.89	4.59	3.17	2.92	-0.24	-0.19	0.23	-0.26	-0.42	0.49	-0.04	-0.12	-0.09	-0.42	0.29	-0.4	-0.32	-0.42	-0.48	-0.53	-0.31	-0.35	-0.4	-0.35	-0.31	-0.34	-0.39	-0.42	-0.26	-0.45	-0.35	-0.33	-0.44	-0.39	-0.41	-0.39
MANNO_MIDBRAIN_NEUROTYPES_HNBML5	0.67	1.68	0.67	3.89	2.28	7.08	1.07	4.16	2.72	0.89	0.54	1.8	6.02	0.79	3.98	2.42	3.18	-0.13	-0.1	0.16	-0.29	-0.37	0.39	-0.08	0.01	0.06	-0.28	0.32	-0.34	-0.31	-0.51	-0.49	-0.45	-0.35	-0.38	-0.47	-0.32	-0.33	-0.28	-0.38	-0.41	-0.3	-0.46	-0.38	-0.33	-0.42	-0.32	-0.36	-0.28
MANNO_MIDBRAIN_NEUROTYPES_HRN	0.97	2.1	1.75	2.46	2.38	6.09	0.41	2.84	0.14	0.15	0.98	1.65	6.78	1.39	2.57	1.81	2.38	-0.26	-0.26	-0.33	-0.32	-0.54	0.36	-0.09	-0.23	0.44	-0.43	0.13	-0.5	-0.43	-0.61	-0.51	-0.63	-0.3	-0.5	-0.49	-0.47	-0.4	-0.48	-0.47	-0.53	-0.36	-0.57	-0.49	-0.46	-0.51	-0.45	-0.5	-0.42
MANNO_MIDBRAIN_NEUROTYPES_HNBML1	0.55	0.85	1.47	3.06	2.6	5.93	0.58	2.89	2.15	0.55	2.06	2.33	8.38	1.66	2.59	3.25	2.44	0.25	-0.07	-0.01	-0.18	-0.42	0.56	-0.09	-0.18	0.29	-0.61	-0.01	-0.5	-0.41	-0.48	-0.5	-0.57	-0.29	-0.47	-0.45	-0.41	-0.44	-0.41	-0.41	-0.52	-0.35	-0.56	-0.45	-0.44	-0.51	-0.47	-0.48	-0.43
MANNO_MIDBRAIN_NEUROTYPES_HOMTN	-0.03	0.65	0.98	3.25	2.6	6.58	1.4	3.11	2.13	1.41	2.37	2.26	7.7	1.74	4.92	3.78	2.42	0.76	0.25	0.2	-0.05	-0.59	0.3	-0.06	-0.35	-0.49	-0.77	-0.2	-0.56	-0.35	-0.49	-0.63	-0.6	-0.36	-0.54	-0.58	-0.46	-0.45	-0.52	-0.61	-0.56	-0.5	-0.6	-0.54	-0.52	-0.56	-0.58	-0.58	-0.53
DURANTE_ADULT_OLFACTORY_NEUROEPITHELIUM_IMMATURE_NEURONS	0.85	1.72	0.62	2.18	1.74	4.51	0.28	1.82	1.2	0.34	1.52	1.11	4.97	1.53	2.27	2.31	1.66	0.24	-0.14	0.3	0.34	-0.04	0.25	-0.29	-0.2	-0.23	-0.41	-0.02	-0.46	-0.38	-0.58	-0.59	-0.54	-0.46	-0.54	-0.56	-0.51	-0.37	-0.51	-0.51	-0.57	-0.44	-0.6	-0.51	-0.46	-0.57	-0.53	-0.51	-0.52
ZHONG_PFC_C3_MICROGLIA	0.46	1.1	1.01	2.09	1.16	3.56	0.44	2.44	0.81	0.48	2.26	0.81	4.98	1.17	1.76	2.45	2.04	0.03	-0.27	0.34	-0.08	-0.46	0.14	-0.48	-0.16	-0.09	-0.35	0.04	-0.43	-0.37	-0.51	-0.54	-0.53	-0.45	-0.42	-0.57	-0.42	-0.46	-0.49	-0.5	-0.53	-0.44	-0.57	-0.46	-0.42	-0.5	-0.46	-0.46	-0.4
ZHONG_PFC_C3_ASTROCYTE	0.53	2.55	1.16	2.2	1.96	5.86	0.72	3.36	1.57	-0.08	2.91	1.53	5.92	1.64	2.18	3.22	2.08	0.18	0.09	-0.12	0.01	-0.41	-0.42	-0.23	-0.3	0.51	-0.33	-0.05	-0.22	-0.36	-0.42	-0.42	-0.41	-0.32	-0.47	-0.47	-0.42	-0.41	-0.39	-0.39	-0.45	-0.36	-0.41	-0.38	-0.42	-0.46	-0.43	-0.38	-0.42
MANNO_MIDBRAIN_NEUROTYPES_HSERT	0.3	0.69	0.46	5.97	2.91	7.16	0.98	5.39	3.72	0.18	1.65	0.94	8.75	0.95	2.77	2.57	3.73	0.07	-0.15	0.06	-0.32	-0.56	0.58	-0.04	-0.28	-0.18	-0.3	0.33	-0.59	-0.31	-0.5	-0.59	-0.59	-0.38	-0.39	-0.44	-0.38	-0.33	-0.45	-0.44	-0.53	-0.27	-0.48	-0.39	-0.42	-0.44	-0.48	-0.45	-0.48
MURARO_PANCREAS_DELTA_CELL	-0.02	0.27	1.32	4.64	1.85	6.05	1.61	3.77	2.82	1.25	1.27	1.12	5.65	0.91	2.04	2.52	2.19	-0.15	-0.3	0.29	0.01	-0.38	-0.43	-0.22	-0.18	0.26	-0.43	-0.46	-0.29	-0.38	-0.48	-0.45	-0.52	-0.44	-0.43	-0.43	-0.45	-0.46	-0.42	-0.43	-0.52	-0.49	-0.48	-0.44	-0.44	-0.46	-0.51	-0.45	-0.48
TRAVAGLINI_LUNG_NEUROENDOCRINE_CELL	0.37	1.26	-0.11	3.87	2.65	5.23	-0.04	2.93	2.02	-0.17	0.76	1.29	4.24	0.27	1.56	1.79	1.62	0.06	-0.13	0.62	-0.17	-0.35	0.7	-0.33	-0.11	-0.28	-0.34	-0.18	-0.49	-0.38	-0.47	-0.62	-0.63	-0.29	-0.53	-0.61	-0.49	-0.48	-0.52	-0.49	-0.56	-0.49	-0.6	-0.49	-0.45	-0.59	-0.46	-0.52	-0.52
DESCARTES_FETAL_ADRENAL_MEGAKARYOCYTES	1.13	1.01	-0.27	0.42	-0.08	1.71	-0.4	0.15	0.14	0.75	1.76	0.91	4.04	1.77	0.66	1.11	0.24	-0.37	-0.36	-0.18	-0.29	-0.55	-0.25	-0.45	-0.43	-0.22	-0.56	-0.47	-0.33	-0.44	-0.51	-0.45	-0.46	-0.47	-0.4	-0.4	-0.4	-0.44	-0.43	-0.45	-0.48	-0.44	-0.44	-0.47	-0.47	-0.41	-0.49	-0.43	-0.43
DESCARTES_MAIN_FETAL_LENS_FIBRE_CELLS	1.07	0.32	0.72	1	0.32	0.91	-0.17	0.41	1.89	-0.32	1.98	1.12	4.99	1.26	0.58	1.03	0.7	-0.14	-0.25	-0.29	-0.17	-0.35	-0.64	-0.37	-0.46	-0.41	-0.29	-0.17	-0.4	-0.42	-0.47	-0.48	-0.5	-0.47	-0.43	-0.45	-0.45	-0.43	-0.49	-0.45	-0.49	-0.41	-0.47	-0.42	-0.46	-0.37	-0.49	-0.45	-0.47
GAUTAM_EYE_IRIS_CILIARY_BODY_MONOCYTES	0.42	0.59	-0.33	1.66	0.47	1.12	0.09	1.34	-0.14	1.65	4.17	2.73	7.13	1.06	0.7	0.97	0.73	-0.15	0.01	0.05	0.64	-0.38	-0.08	-0.32	-0.33	-0.21	-0.48	-0.68	-0.21	-0.27	-0.61	-0.6	-0.5	-0.44	-0.52	-0.44	-0.48	-0.44	-0.54	-0.42	-0.5	-0.48	-0.48	-0.48	-0.44	-0.54	-0.42	-0.4	-0.56
DESCARTES_FETAL_LUNG_MESOTHELIAL_CELLS	0.98	0.23	0.28	3.47	0.65	1.72	0.24	2.04	0.5	2.25	2.46	1.89	4.86	0.04	0.35	3.21	0.43	0.57	0.66	0.26	0.01	-0.27	-0.77	-0.15	-0.35	-0.29	-0.23	-0.31	-0.29	-0.28	-0.33	-0.25	-0.25	-0.11	-0.3	-0.24	-0.32	-0.24	-0.31	-0.2	-0.32	-0.24	-0.25	-0.27	-0.27	-0.25	-0.33	-0.15	-0.3
GAUTAM_EYE_CHOROID_SCLERA_MONOCYTES	0.03	1.88	0.38	2.46	0.19	2.11	0.02	1.59	2.53	2.37	2.62	1.16	5.62	0.8	1.37	1.6	0.83	0.07	-0.23	0.01	0.05	-0.27	-0.66	-0.17	-0.05	0.15	-0.14	-0.06	0.07	-0.28	-0.43	-0.44	-0.38	-0.38	-0.49	-0.5	-0.23	-0.34	-0.32	-0.25	-0.38	-0.34	-0.42	-0.34	-0.4	-0.32	-0.36	-0.46	-0.28
MANNO_MIDBRAIN_NEUROTYPES_BASAL	0.43	0.5	0.59	1.36	0.21	1.73	-0.19	1.05	0.76	1.36	1.34	1.97	4.52	0.37	0.08	1.57	0.23	-0.3	-0.08	0.12	-0.03	-0.58	-0.45	-0.39	-0.27	-0.17	-0.16	-0.76	-0.28	-0.22	-0.26	-0.67	-0.47	-0.43	-0.57	-0.67	-0.47	-0.47	-0.49	-0.51	-0.55	-0.45	-0.54	-0.48	-0.42	-0.61	-0.6	-0.43	-0.49
VANGURP_PANCREATIC_ALPHA_CELL	0.97	1.38	1.3	3.57	0.17	3.38	-0.07	3.27	1.76	2.14	1.06	2.97	6.93	0.52	2.06	1.85	1.17	-0.23	-0.25	0.06	-0.04	-0.4	-0.5	-0.18	-0.41	-0.31	0.16	-0.56	-0.31	-0.42	-0.35	-0.43	-0.41	-0.43	-0.42	-0.37	-0.41	-0.42	-0.44	-0.4	-0.39	-0.36	-0.43	-0.39	-0.39	-0.46	-0.4	-0.45	-0.39
TRAVAGLINI_LUNG_CD4_NAIVE_T_CELL	0	1.08	0.35	1.68	0.52	0.26	0	1.49	0.11	1.64	1.15	1.23	3.92	0.17	0.38	0.88	0.61	-0.15	0.02	0.06	-0.2	-0.64	-1.07	-0.2	-0.25	-0.12	-0.15	-0.57	-0.27	-0.22	0.08	-0.19	-0.33	-0.18	-0.39	-0.34	-0.41	-0.24	-0.24	-0.5	-0.31	-0.33	-0.27	-0.34	-0.25	-0.25	-0.4	-0.2	-0.08
TRAVAGLINI_LUNG_NATURAL_KILLER_CELL	0.82	2.33	1.22	2.23	0.08	0.61	-0.12	2.18	0.54	-0.01	3.15	1.98	6.47	0.79	2.69	2.43	0.54	-0.23	-0.39	-0.68	-0.2	-0.63	-0.34	-0.16	-0.3	-0.32	-0.33	-0.27	-0.41	-0.35	-0.45	-0.41	-0.53	-0.44	-0.32	-0.43	-0.58	-0.34	-0.45	-0.46	-0.43	-0.35	-0.5	-0.44	-0.44	-0.43	-0.4	-0.39	-0.35
ZHENG_CORD_BLOOD_C8_PUTATIVE_LYMPHOID_PRIMED_MULTIPOTENT_PROGENITOR_2	2.39	2.05	-0.1	3.15	0.22	1	-0.26	1.79	0.17	-0.14	1.72	1.96	5.05	0.15	1.43	1.29	0.49	-0.17	-0.26	-0.41	-0.19	-0.59	-0.68	-0.25	-0.4	-0.27	-0.39	-0.37	-0.42	-0.32	-0.31	-0.44	-0.49	-0.4	-0.35	-0.43	-0.5	-0.29	-0.35	-0.45	-0.42	-0.28	-0.46	-0.37	-0.35	-0.3	-0.42	-0.32	-0.35
DESCARTES_FETAL_SPLEEN_AFP_ALB_POSITIVE_CELLS	0.45	1.27	0.03	1.29	1.28	2.35	0.63	2.39	1.69	-0.12	1.55	0.77	1.93	0.99	0.68	1.47	1.83	-0.05	-0.23	-0.03	0.51	-0.54	-0.49	-0.4	-0.36	-0.35	-0.59	-0.58	-0.47	-0.38	-0.59	-0.55	-0.55	-0.54	-0.55	-0.56	-0.67	-0.57	-0.64	-0.6	-0.64	-0.58	-0.6	-0.62	-0.62	-0.65	-0.62	-0.56	-0.57
GAUTAM_EYE_IRIS_CILIARY_BODY_COL9A1_HIGH_CILIARY_BODY_CELLS	0.33	2.21	1.54	1.21	2.1	4.38	0.82	2.44	1.48	0.76	3.1	1.26	3.71	2.39	1.15	1.26	2.26	0.08	-0.29	-0.22	0.41	-0.58	-0.42	-0.28	-0.3	-0.08	-0.02	-0.42	-0.22	-0.32	-0.6	-0.53	-0.52	-0.52	-0.46	-0.53	-0.46	-0.46	-0.48	-0.51	-0.52	-0.46	-0.54	-0.42	-0.48	-0.53	-0.47	-0.5	-0.52
GOBP_MESODERM_DEVELOPMENT	0.71	0.17	2.83	1.66	1.55	2.5	0.17	2.91	1.93	0.05	1.58	1.26	3.05	1.84	2.8	2.32	2.21	0.13	-0.12	0.32	0.22	-0.39	0.08	-0.4	-0.2	0.7	-0.42	-0.56	-0.31	-0.32	-0.46	-0.36	-0.5	-0.34	-0.42	-0.51	-0.32	-0.46	-0.4	-0.44	-0.55	-0.46	-0.46	-0.47	-0.49	-0.42	-0.48	-0.48	-0.36
GOBP_MESODERM_MORPHOGENESIS	0.84	0.1	1.99	1.92	1.6	2.58	0.02	2.77	1.24	0.13	1.93	0.21	3.2	1.16	1.33	1.58	2.08	0.14	-0.08	0.4	0.22	-0.4	-0.54	-0.31	-0.02	0.18	-0.38	-0.43	-0.29	-0.34	-0.38	-0.39	-0.45	-0.33	-0.39	-0.45	-0.44	-0.39	-0.4	-0.45	-0.5	-0.45	-0.47	-0.46	-0.44	-0.42	-0.44	-0.45	-0.37
GOBP_MESODERMAL_CELL_DIFFERENTIATION	1.62	-0.17	2.2	1.06	0.87	3.13	-0.15	0.99	2.01	0.16	2.39	1.06	4.19	1.39	1.34	1.15	0.56	0.55	0.17	-0.3	0.71	-0.44	-0.5	-0.2	0.04	0.33	-0.45	-0.27	-0.27	-0.28	-0.34	-0.31	-0.42	-0.32	-0.34	-0.54	-0.44	-0.36	-0.38	-0.42	-0.5	-0.43	-0.45	-0.44	-0.45	-0.38	-0.39	-0.44	-0.35
DESCARTES_FETAL_PLACENTA_SYNCYTIOTROPHOBLASTS_AND_VILLOUS_CYTOTROPHOBLASTS	0.62	3.1	0.04	2.56	0.26	0.61	-0.08	0.65	0.57	0.62	0.39	0.81	3.64	0.2	1.88	0.28	0.4	-0.36	-0.19	1.01	0.46	-0.46	-0.07	-0.31	0.12	-0.02	-0.21	-0.16	-0.31	-0.37	-0.4	-0.37	-0.27	-0.19	-0.26	-0.24	-0.41	-0.25	-0.17	-0.3	-0.39	-0.32	-0.43	-0.3	-0.33	-0.31	-0.35	-0.31	-0.35
[truncated: 18 more rows]
[truncated: 28 more columns]

## Sheet: Day 5
Table S6. iTF-mediated lineage specification
[truncated: 644 more rows]
[truncated: 20 more columns]
