# Supplementary material for: Systematic mapping of TF-mediated cell fate changes by a pooled induction coupled with scRNA-seq and multi-omics approaches
Source: Genome Res. 2024 Mar;34(3):484–97. doi: 10.1101/gr.277926.123 (PMC11067882; doi:10.1101/gr.277926.123)
Supplement: Supplement 7 [file Supplemental_Table_S7.xlsx]

## Sheet: Primers
Table S7. Primers
RT_Gata3_F	CCTCTGGAGGAGGAACGCTAAT
RT_Gata3_R	GTTTCGGGTCTGGATGCCTTCT
RT_Arid3a_F	TCCATCACCAGTGCTGCCTTCA
RT_Arid3a_R	TCCCTGCGATTGCTGTCTATGG
RT_Hand1_F	CCTTCAAGGCTGAACTCAAAAA
RT_Hand1_R	GCGCCCTTTAATCCTCTTCT
RT_Tfap2c_F	GCGGAAGAGTATGTTGTTGGCTG
RT_Tfap2c_R	GTATGTTCGGCTCCAAGACCTG
RT_Cdx2_F	GCGAAACCTGTGCGAGTGGATG
RT_Cdx2_R	CGGTATTTGTCTTTTGTCCTGGTTTTCA
RT_Map1b_F	ACCACTCCTGAGGTCAAAGCCA
RT_Map1b_R	GTGGACGACTTGGCTGTCTTAG
RT_Ngfr_F	GGAGAGAAACTGCACAGCGACA
RT_Ngfr_R	CAGGCTACTGTAGAGGTTGCCA
RT_Ntrk2_F	CCACGGATGTTGCTGACCAAAG
RT_Ntrk2_R	GCCAAACTTGGAATGTCTCGCC
RT_Lhx1_F	CAAAGCCAAGCAACTGGAGACG
RT_Lhx1_R	GAGCGTCGATTCTGGAACCAGA
RT_Gnat2_F	AGTTCCAGCTCAATGACTCGGC
RT_Gnat2_R	GATGCCTGTTGTCTTGACTCTGG
RT_Dlx3_F	CTCACACAAACACAGGTGAAAATCT
RT_Dlx3_R	ATGGAGTCACTGTTGTTGGGG
RT_Dlx4_F	GCTCGAAGCAGAATCAGAGAAG
RT_Dlx4_R	CTGCAGGCTAGAGTAGATGGTTCT
RT_Dlx5_F	GAGAAGGTTTCAGAAGACTCAGTACC
RT_Dlx5_R	CTTCTTGATCTTGGATCTTTTGTTC
RT_Lmo1_F	TGATCCCAGCTTTTGAGATGGT
RT_Lmo1_R	CTCCCACGCAAAATCTCTGATTG
RT_St6gal1_F	CCTACAGACAACTTCCAACAGGAT
RT_St6gal1_R	TTTTCTGTGGTGACTAACTGAGAGT
RT_Ggt1_F	TAGTACCATCAACCTCTACTTTGGC
RT_Ggt1_R	AGCTGAAGTCATCCATCTCATCATT
RT_Ccdc113_F	CAATTGAGACAGAAGGAGGAGGTAG
RT_Ccdc113_R	GATCAGTTCTTTGTTCCTTGCTTCA
RT_Osbpl6_F	TCTTCTCAGAACAAGTTAGCCATCA
RT_Osbpl6_R	CCATCTGATATCTTGCCAAAACACA
RT_Mecom_F	TTTACAGAGATCCGCAATTTCATCG
RT_Mecom_R	TTTATCCTTGAAGTGACTGCCATTC
RT_Foxn4_F	GGACTTCCTCAACATCAACAGTG
RT_Foxn4_R	AAGCTGTCCTCCTTCATCTCTTC
RT_Nkx2-1_F	GGCAACATGAGCGAGCTG
RT_Nkx2-1_R	GGGCCATGTTCTTGCTCAC
RT_Nkx2-5_F	TTCAAGCAACAGCGGTACCT
RT_Nkx2-5_R	ACCAGATCTTGACCTGCGTG
RT_Chst1_F	ATTTCTCTAGCTCTGTGTCTACTGG
RT_Chst1_R	CTGTCTTCTTCATTGGATTTCTGGC
RT_Mfsd2a_F	AAGACAGCTGTATACATCGGGATC
RT_Mfsd2a_R	AAGTGACGATTAGATTACGCTCCAT
RT_Vwa1_F	ACTTTGTGGATGTGGATGATCTTC
RT_Vwa1_R	GAAGCCACTGGACAGAACCTC
RT_Prox1_F	CTCATGTTCTTTTACACCCGCTAC
RT_Prox1_R	TAATGCATCTGTTGAACTTCACGTC
RT_Greb1l_F	GGGTTTTCTGGAAATTGTATCGGTT
RT_Greb1l_R	GAGCTTCAAGTTAATGTGGTTGGAA
RT_Pde2a_F	GTGGATGCCTCTGAAGATCAAAAG
RT_Pde2a_R	AGAAGTAGCATCCAAGTCAAAGAGT
RT_Timp3_F	TTAAGCAGATGAAGATGTACCGAGG
RT_Timp3_R	GGTATTTGTTGACTTCTAGCTTGAGG
RT_S100a13_F	GTGGGCTCTCTAGATGAAAAGATGA
RT_S100a13_R	TCTCCAATCAGTCTCCAGTATTCAC
RT_Tgfbr3_F	AAAATCTGTCAACTGGGTGATCAAG
RT_Tgfbr3_R	GTCATGGATCGTTCACTCTCTTTTC
RT_endo_Gata3_F	AACTCTTCGCACACTTGGAGAC
RT_endo_Gata3_R	CATCCCTGAGCCACATCTCTC
RT_endo_Cdx2_F	CGCACGGAGCTAGGATACAT
RT_endo_Cdx2_R	GGCAGCCTTCAACGTTTGTC
RT_endo_Ets2_F	CCACTTGCTCCAAAGACCCA
RT_endo_Ets2_R	CAGAGAGGCTATGCCGGTTT
RT_endo_Yy1_F	GCGAATCCATACCGGAGACA
RT_endo_Yy1_R	ACACTCCTGAAGAGGCTTCC
RT_endo_Fosl1_F	AAGTGGTTCAGCCCAAGAAC
RT_endo_Fosl1_R	TTCCCCGTAGTCTCGGTACAT
RT_endo_Fosl2_F	GTGGGGACCAGTCATCAGAC
RT_endo_Fosl2_R	GCCCCTTATTCCCTCAAGGC
RT_endo_Jun_F	GAGGGCATCGTCGTAGAAGG
RT_endo_Jun_R	TTGTTACAGAAGCGGGGACG
RT_endo_Meis1_F	TCCTTGCAGGAAAAGACCTGA
RT_endo_Meis1_R	AGGAGACCCGACAATGAGTG
RT_endo_Mef2d_F	CACAGTGTGAGGCTCCTGAT
RT_endo_Mef2d_R	ACTTCCGCTTGGTGAAGGTC
RT_endo_Id2_F	TGGTCCGACAGGCTGTTTTT
RT_endo_Id2_R	GTCTTCCTCCTACGAGCAGC
RT_endo_Esrrg_F	CAAGGCAGTCCAGCACTTCT
RT_endo_Esrrg_R	TTCAACGTGCAGGATGGGAG
RT_endo_Gata4_F	GCCCCAGCCTTTTACTTTGC
RT_endo_Gata4_R	AGCAGGACTCTTGGAACAGC
RT_endo_Etv4_F	GAGCAACCCCACCATGTCAA
RT_endo_Etv4_R	TCCTGCCTACCTCCCAGAAC
RT_endo_Gli1_F	GGGCACCTCATGTAGCCATT
RT_endo_Gli1_R	ACATGAGTGTCTTGCTGGGG
RT_endo_Dlx3_F	TAACCCTGGGGCTGTGTACT
RT_endo_Dlx3_R	CTAGGACAGGGCACCTTCTG
RT_endo_Dlx5_F	GATTCCTGAGACGGGTGGTG
RT_endo_Dlx5_R	CCGCAGTAGAAGAACAGCCA
RT_endo_Nkx2-5_F	CGCCCTTCTCCTAAAGGTGG
RT_endo_Nkx2-5_R	CTTCGTGAACTTTGGCGTCG
RT_endo_Pdx1_F	CTAAGGCCTGGCTTGTAGCTC
RT_endo_Pdx1_R	TCCTTGTAGAGCTGTGTGGC
RT_endo_Gcm1_F	GCATGCATGGGCTTAGATCA
RT_endo_Gcm1_R	TCACGACTGGGAGAGAGAAGG
RT_endo_Otx2_F	AGCCCATTGACTGCGTAAGG
RT_endo_Otx2_R	CCACTCCAGGCGAATCGAGA
RT_endo_Creb3l2_F	GATCCAGTGGTGAAGGGGAA
RT_endo_Creb3l2_R	GCTGGAGAGGAGAGTGAACG
RT_endo_Mllt1_F	CCAACCACTGAGGGGTACTG
RT_endo_Mllt1_R	ACTGTTCGCAAGCTGCAGAG
